# Supplementary material
Source: HighWire-hosted journal article supplement (doi:10.1101/rna.049098.114)
Supplement: TableS1_libraries_statistics.xlsx [file TableS1_libraries_statistics.xlsx]

## Sheet: 1-dmelibraries
Name	Run	GSMnumber	modENCODE	LibraryInternalName	Adapter3prime	Experiment	Submission	SRAStudy	Sample Accession	Study Title	BioProject
V063V0632...combined V063 and V0632.CS,ovary,AGO1IP	V063V0632			V063V0632
	SRR069266	GSM609230	modENCODE_2744	V063	CTGTAGGCACCATCAATC	SRX028838	SRA024744	SRP003842	SRS117381	GSE24310: Canton S Ago1 Immunoprecipitation	GEO Series accession: GSE24310
	V0632			V0632	CTGTAGGCACCATCAATC					CS,ovary,AGO1IP
V064V0642...combined V064 and V0642.ago2[414], ovary, AGO1IP	V064V0642			V064V0642
	SRR069268	GSM609231	modENCODE_2746	V064	CTGTAGGCACCATCAATC	SRX028839	SRA024746	SRP003843	SRS117382	GSE24311: Ago2[414] Ago1 Immunoprecipitation	GEO Series accession: GSE24311
	V0642			V0642	CTGTAGGCACCATCAATC					ago2[414], ovary, AGO1IP
V065V0652...combined V065 and V0652.dcr-2[L811fsX], ovary, AGO1IP	V065V0652			V065V0652
	SRR069274	GSM609236	modENCODE_2833	V065	CTGTAGGCACCATCAATC	SRX028841	SRA024752	SRP003846	SRS117384	GSE24316: dcr-2[L811fsX] Ago1 Immunoprecipitation ovary	GEO Series accession: GSE24316
	V0652			V0652	CTGTAGGCACCATCAATC					dcr-2[L811fsX], ovary, AGO1IP
V066V0662...combined V066 and V0662.r2d2[1], ovary, AGO1IP	V066V0662			V066V0662
	V066	GSM609233	modENCODE_2749	V066	CTGTAGGCACCATCAATC					GSE24313: r2d2 Ago1 Immunoprecipitation ovary	GEO Series accession: GSE24313
	V0662			V0662	CTGTAGGCACCATCAATC					r2d2[1], ovary, AGO1IP
V097.SRR069232.GSM609246..CS ovary	SRR069232	GSM609246	modENCODE_2976	V097	CTGTAGGCACCATCAATC	SRX028800	SRA024715	SRP003820	SRS117359	GSE24545: Canton S Adult ovaries	GEO Series accession: GSE24545
V0892.SRR073602.GSM628272.resequenced of V089.ago2[414] ovary total RNA Â	SRR073602	GSM628272	modENCODE_3315	V0892	CTGTAGGCACCATCAATC	SRX031801	SRA026681	SRP004630	SRS139289	GSE25570: Ovary small RNA	GEO Series accession: GSE25570
V098.SRR069233.GSM609245..dcr-2[L811fsX] ovary	SRR069233	GSM609245	modENCODE_2975	V098	CTGTAGGCACCATCAATC	SRX028801	SRA024716	SRP003821	SRS117360	GSE24544: Dcr-2[L811fsX] Ovary smallRNA RNA-Seq	GEO Series accession: GSE24544
V0882.SRR073601.GSM628271.resequenced of V088.r2d2[1] ovary total RNA Â	SRR073601	GSM628271	modENCODE_3314	V0882	CTGTAGGCACCATCAATC	SRX031800	SRA026681	SRP004630	SRS139288	GSE25570: Ovary small RNA	GEO Series accession: GSE25570
SRR068998.S2.head female	SRR068998	GSM240749	modENCODE_737	S2	CTGTAGGCACCATCAATC	SRX028578	SRA024695	SRP003801	SRS117295	GSE10790: Drosophila melanogaster small RNA sequence: female heads	GEO Series accession: GSE10790
SRR013604.S22.head female	SRR013604	GSM322533		S22	CTGTAGGCACCATCAATC	SRX002671	SRA008172	SRP000602	SRS002176	Drosophila melanogaster larval, pupal and adult head small RNA libraries	GEO Series accession: GSE12840
SRR016854.S24.male body	SRR016854	GSM399107	modENCODE_2554	S24	CTGTAGGCACCATCAATC	SRX005025	SRA008659	SRP000788	SRS003140	small RNA from adult Drosophila melanogaster	GEO Series accession: GSE15898
SRR018039.S23.female body	SRR018039	GSM399106	modENCODE_2555	S23	CTGTAGGCACCATCAATC	SRX005023	SRA008659	SRP000788	SRS003138	small RNA from adult Drosophila melanogaster	GEO Series accession: GSE15898
SRR069835.S1.head male	SRR069835	GSM286601	modENCODE_747	S1	CTGTAGGCACCATCAATC	SRX029072	SRA025073	SRP003879	SRS117898	Drosophila melanogaster small RNA sequence from 14 libraries	GEO Series accession: GSE11624
SRR069836.S3.male body	SRR069836	GSM286602	modENCODE_739	S3	CTGTAGGCACCATCAATC	SRX029073	SRA025073	SRP003879	SRS117899	Drosophila melanogaster small RNA sequence from 14 libraries	GEO Series accession: GSE11624
SRR069837.S4.female body	SRR069837	GSM286603	modENCODE_743	S4	CTGTAGGCACCATCAATC	SRX029074	SRA025073	SRP003879	SRS117900	Drosophila melanogaster small RNA sequence from 14 libraries	GEO Series accession: GSE11624
SRR069236.V090.male body	SRR069236	GSM609234	modENCODE_2751	V090	CTGTAGGCACCATCAATC	SRX028804	SRA024719	SRP003824	SRS117363	GSE24314: Dm Canton-S Adult Male Body smallRNA RNA-Seq	GEO Series accession: GSE24314
SRR069832.S5.Imaginal disc	SRR069832	GSM275691	modENCODE_742	S5	CTGTAGGCACCATCAATC	SRX029069	SRA025070	SRP003876	SRS117895	Drosophila melanogaster small RNA sequence: cell lines and imaginal disc	GEO Series accession: GSE10794
SRR016853.S21.imaginal disc brain	SRR016853	GSM399105	modENCODE_2376	S21	CTGTAGGCACCATCAATC	SRX005024	SRA008659	SRP000788	SRS003139	small RNA from adult Drosophila melanogaster	GEO Series accession: GSE15898
SRR031692..head	SRR031692	GSM466487			CTGTAGGCACCATCAAT	SRX014446	SRA010241	SRP001536	SRS008434	Sorting of Drosophila small silencing RNAs partitions microRNA* strands into the RNA interference pathway	GEO Series accession: GSE18806
SRR031696..AGO1IP head	SRR031696	GSM466489			CTGTAGGCACCATCAAT	SRX014448	SRA010241	SRP001536	SRS008436	Sorting of Drosophila small silencing RNAs partitions microRNA* strands into the RNA interference pathway	GEO Series accession: GSE18806
SRR032152..AGO1IP head	SRR032152	GSM466489			CTGTAGGCACCATCAAT	SRX014448	SRA010241	SRP001536	SRS008436	Sorting of Drosophila small silencing RNAs partitions microRNA* strands into the RNA interference pathway	GEO Series accession: GSE18806
SRR060644..ovary A2	SRR060644	GSM548583			CTGTAGGCACCATCAATCGTATGCCGTCTTCTGCTTG	SRX023725	SRA020991	SRP002877	SRS085135	Small RNA-based silencing strategies for transposons in the process of invading Drosophila species	GEO Series accession: GSE22067
SRR060647..AGO2 IP ovary A2	SRR060647	GSM548586			CTGTAGGCACCATCAATCGTATGCCGTCTTCTGCTTG	SRX023728	SRA020991	SRP002877	SRS085138	Small RNA-based silencing strategies for transposons in the process of invading Drosophila species	GEO Series accession: GSE22067
V094....FLAG-IP from S2-R+, FLAG-HA-AGO2	SRR768821			V094	CTGTAGGCACCATCAATC	SRX247213	SRA068304	SRP018995	SRS399252	Functional small RNAs are generated from select miRNA hairpin loops in flies and mammals	PRJNA192603
V095....AGO1-IP from S2-R+, FLAG-HA-AGO2	SRR768820			V095	CTGTAGGCACCATCAATC	SRX247212	SRA068304	SRP018995	SRS399252	Functional small RNAs are generated from select miRNA hairpin loops in flies and mammals	PRJNA192603
SRR013547.V020, SRR013548.V025 combined.cell line S2R+	V020V025			V020V025
SRR013547.V020.cell line S2R+	SRR013547	GSM343832		V020	CTGTAGGCACCATCAATC	SRX002618	SRA008168	SRP000598	SRS002123	Drosophila melanogaster S2R+ cells	GEO Series accession: GSE13679
SRR013548.V025.cell line S2R+	SRR013548	GSM343833		V025	CTGTAGGCACCATCAATC	SRX002619	SRA008168	SRP000598	SRS002124	Drosophila melanogaster S2R+ cells	GEO Series accession: GSE13679
SRR1015573..GFP knockdown, AGO1IP, S2R+	SRR1015573				AGO1-associated RNA was extracted using randomized 3’ adaptor (5’rAppNNNNTGGAATTCTCGGGTGCCAAGG/ 3ddC/) and randomized 5’ adaptor (5'GUUCAGAGUUCUACAGUCCGACGAUCNNNN). Genome_build: n/a, trim adaptors using fastx_clipper, trim 4 random nucleotides from each end, using custom script, collapse identical reads using fastq_collapser, Supplementary_files_format_and_content: read count table files (column…	SRX367010	SRA107962	SRP031850	SRS493134	GSE51585: Intertwined pathways for Argonaute-mediated microRNA biogenesis in Drosophila	GEO Series accession: GSE51585
SRR1015574..dcr1 knockdown, AGO1IP, S2R+	SRR1015574				AGO1-associated RNA was extracted using randomized 3’ adaptor (5’rAppNNNNTGGAATTCTCGGGTGCCAAGG/ 3ddC/) and randomized 5’ adaptor (5'GUUCAGAGUUCUACAGUCCGACGAUCNNNN). Genome_build: n/a, trim adaptors using fastx_clipper, trim 4 random nucleotides from each end, using custom script, collapse identical reads using fastq_collapser, Supplementary_files_format_and_content: read count table files (column…	SRX367011	SRA107962	SRP031850	SRS493135	GSE51585: Intertwined pathways for Argonaute-mediated microRNA biogenesis in Drosophila	GEO Series accession: GSE51585
SRR069830.S15.cell line S2-GMR	SRR069830	GSM272652	modENCODE_746	S15	CTGTAGGCACCATCAATC	SRX029067	SRA025070	SRP003876	SRS117893	Drosophila melanogaster small RNA sequence: cell lines and imaginal disc	GEO Series accession: GSE10794
SRR013618.S30.cell line S2-GMR	SRR013618	GSM361908		S30	CTGTAGGCACCATCAATC	SRX002678	SRA008174	SRP000606	SRS002182	Drosophila melanogaster S2-GMR cells	GEO Series accession: GSE14488
SRR069831.S16.cell line KC	SRR069831	GSM272653	modENCODE_738	S16	CTGTAGGCACCATCAATC	SRX029068	SRA025070	SRP003876	SRS117894	Drosophila melanogaster small RNA sequence: cell lines and imaginal disc	GEO Series accession: GSE10794
SRR016855.S33.cell line KC	SRR016855	GSM399110	modENCODE_2374	S33	CTGTAGGCACCATCAATC	SRX005026	SRA008661	SRP000789	SRS003141	small RNA from Drosophila melanogaster - Kc cell line	GEO Series accession: GSE15899
SRR029028..cell line S2-NP mock	SRR029028	GSM430030			CTGTAGGCACCATCAATC	SRX012157	SRA009945	SRP001305	SRS006622	Processing of Drosophila endo-siRNAs depends on a specific Loquacious isoform	GEO Series accession: GSE17171
SRR029029..dcr1 knocdown S2-NP	SRR029029	GSM430031			CTGTAGGCACCATCAATC	SRX012158	SRA009945	SRP001305	SRS006623	Processing of Drosophila endo-siRNAs depends on a specific Loquacious isoform	GEO Series accession: GSE17171
SRR029030..dcr2 knockdown S2-NP	SRR029030	GSM430032			CTGTAGGCACCATCAATC	SRX012159	SRA009945	SRP001305	SRS006624	Processing of Drosophila endo-siRNAs depends on a specific Loquacious isoform	GEO Series accession: GSE17171
SRR029031..loqs knockdown S2-NP	SRR029031	GSM430033			CTGTAGGCACCATCAATC	SRX012160	SRA009945	SRP001305	SRS006625	Processing of Drosophila endo-siRNAs depends on a specific Loquacious isoform	GEO Series accession: GSE17171
SRR029032..r2d2 knockdown S2-NP	SRR029032	GSM430034			CTGTAGGCACCATCAATC	SRX012161	SRA009945	SRP001305	SRS006626	Processing of Drosophila endo-siRNAs depends on a specific Loquacious isoform	GEO Series accession: GSE17171
SRR029033..lacZ knockdown S2-NP	SRR029033	GSM430035			CTGTAGGCACCATCAATC	SRX012162	SRA009945	SRP001305	SRS006627	Processing of Drosophila endo-siRNAs depends on a specific Loquacious isoform	GEO Series accession: GSE17171
SRR032092..cell line S2-NP mock oxidized	SRR032092	GSM442732			CTGTAGGCACCATCAATCGTATGCCGTCTTCTGCTTG	SRX014797	SRA010262	SRP001552	SRS009287	Hierarchical rules for Argonaute loading in Drosophila	GEO Series accession: GSE17734
SRR032093..ago1 knockdown S2-NP	SRR032093	GSM442733			CTGTAGGCACCATCAATCGTATGCCGTCTTCTGCTTG	SRX014798	SRA010262	SRP001552	SRS009288	Hierarchical rules for Argonaute loading in Drosophila	GEO Series accession: GSE17734
SRR032094..ago2 knockdown S2-NP	SRR032094	GSM442734			CTGTAGGCACCATCAATCGTATGCCGTCTTCTGCTTG	SRX014799	SRA010262	SRP001552	SRS009289	Hierarchical rules for Argonaute loading in Drosophila	GEO Series accession: GSE17734
SRR032095..dcr2 knockdown AGO1IP S2-NP	SRR032095	GSM442735			CTGTAGGCACCATCAATCGTATGCCGTCTTCTGCTTG	SRX014800	SRA010262	SRP001552	SRS009290	Hierarchical rules for Argonaute loading in Drosophila	GEO Series accession: GSE17734
SRR032096..dcr2 knockdown AGO2IP S2-NP	SRR032096	GSM442736			CTGTAGGCACCATCAATCGTATGCCGTCTTCTGCTTG	SRX014801	SRA010262	SRP001552	SRS009291	Hierarchical rules for Argonaute loading in Drosophila	GEO Series accession: GSE17734
SRR015372.V067.cell line S2-NP	SRR015372	GSM371638		V067	CTGTAGGCACCATCAATC	SRX003967	SRA008418	SRP000731	SRS002735	Small RNA from S2 cells (S2-NP)	GEO Series accession: GSE14849
SRR019717.OSS2.cell line OSS	SRR019717	GSM385744	modENCODE_2605	OSS2	TCGTATGCCGTCTTCTGCTTG	SRX006980	SRA009273	SRP001004	SRS004371	Drosophila OSS cell small RNA libraries	GEO Series accession: GSE15378
SRR019718.OSS6.cell line OSS	SRR019718	GSM385748	modENCODE_2605	OSS6	TCGTATGCCGTCTTCTGCTTG	SRX006981	SRA009273	SRP001004	SRS004372	Drosophila OSS cell small RNA libraries	GEO Series accession: GSE15378
SRR019719.OSS7.cell line OSS	SRR019719	GSM385821	modENCODE_2605	OSS7	TCGTATGCCGTCTTCTGCTTG	SRX006982	SRA009273	SRP001004	SRS004373	Drosophila OSS cell small RNA libraries	GEO Series accession: GSE15378
SRR019720.OSS8.cell line OSS	SRR019720	GSM385822	modENCODE_2605	OSS8	TCGTATGCCGTCTTCTGCTTG	SRX006983	SRA009273	SRP001004	SRS004374	Drosophila OSS cell small RNA libraries	GEO Series accession: GSE15378
SRR023197..cell line S2	SRR023197	GSM180337			ATCTCGTATGCCGTCTTCTGCTTG	SRX007800	SRA009393	SRP001090	SRS004782	The endogenous siRNA pathway is involved in heterochromatin formation in Drosophila	heterochromatin endo-siRNAs
SRR028728.V018.cell line KC167	SRR028728	GSM399100	modENCODE_2606	V018	CTGTAGGCACCATCAATC	SRX011859	SRA009926	SRP001284	SRS006274	GSE15897: small RNA from Drosophila melanogaster - cell line Kc167	GEO Series accession: GSE15897
SRR028729.V024.cell line KC167	SRR028729	GSM399101	modENCODE_2606	V024	CTGTAGGCACCATCAATC	SRX011860	SRA009926	SRP001284	SRS006275	GSE15897: small RNA from Drosophila melanogaster - cell line Kc167	GEO Series accession: GSE15897
SRR069243.V076.cell line MLDmBG3-c2	SRR069243	GSM609225	modENCODE_2719	V076	CTGTAGGCACCATCAATC	SRX028811	SRA024722	SRP003827	SRS117366	GSE24306: Lai_ML-DmBG3-C2	GEO Series accession: GSE24306
SRR069246.V075.cell line MLDmBG1-c1	SRR069246	GSM609222	modENCODE_2007	V075	CTGTAGGCACCATCAATC	SRX028814	SRA024725	SRP003832	SRS117369	GSE24303: Lai-ML-DmBG1-C1/BS176	GEO Series accession: GSE24303
SRR069255.V019.cell line GM2	SRR069255	GSM609219	modENCODE_2004	V019	CTGTAGGCACCATCAATC	SRX028828	SRA024728	SRP003835	SRS117372	GSE24300: Lai ‰ÛÒ GM2cell/BS32	GEO Series accession: GSE24300
SRR069256.V021.cell line MLDmD21	SRR069256	GSM609220	modENCODE_2005	V021	CTGTAGGCACCATCAATC	SRX028830	SRA024729	SRP003836	SRS117374	GSE24301: Lai ‰ÛÒ ML-DmD21cell/BS90	GEO Series accession: GSE24301
SRR069257.V026.cell line 1182-4H	SRR069257	GSM609221	modENCODE_2006	V026	CTGTAGGCACCATCAATC	SRX028831	SRA024730	SRP003837	SRS117375	GSE24302: Lai_1182-4Hcell/BS23	GEO Series accession: GSE24302
SRR069258.V010.cell line MLDmD20c5	SRR069258	GSM609217	modENCODE_2002	V010	CTGTAGGCACCATCAATC	SRX028832	SRA024731	SRP003838	SRS117376	GSE24298: Lai - MLDmD20c5/BS16	GEO Series accession: GSE24298
SRR069259.V011.cell line Sg4	SRR069259	GSM609218	modENCODE_2003	V011	CTGTAGGCACCATCAATC	SRX028833	SRA024732	SRP003839	SRS117377	GSE24299: Lai ‰ÛÒ Sg4/BS35	GEO Series accession: GSE24299
SRR069271.V009.cell line CMEL1	SRR069271	GSM609235	modENCODE_2820	V009	CTGTAGGCACCATCAATC	SRX028840	SRA024749	SRP003844	SRS117383	GSE24315: Lai - CMEL1/BS28	GEO Series accession: GSE24315
SRR069299.V028.cell line CMEW1Cl.8+	SRR069299	GSM609226	modENCODE_2721	V028	CTGTAGGCACCATCAATC	SRX028867	SRA024753	SRP003849	SRS117409	GSE24307: Lai_CMEW1_Cl_8	GEO Series accession: GSE24307
SRR069300.V033.cell line CMEW1Cl.8+	SRR069300	GSM609227	modENCODE_2721	V033	CTGTAGGCACCATCAATC	SRX028868	SRA024753	SRP003849	SRS117410	GSE24307: Lai_CMEW1_Cl_8	GEO Series accession: GSE24307
SRR069506.V029.cell line ML-DmD9	SRR069506	GSM609248	modENCODE_3192	V029	CTGTAGGCACCATCAATC	SRX028911	SRA024989	SRP003857	SRS117433	GSE24605: Lai - MLDmD9/BS102	GEO Series accession: GSE24605
SRR069508.V035.cell line MLDmD32	SRR069508	GSM609250	modENCODE_3194	V035	CTGTAGGCACCATCAATC	SRX028913	SRA024991	SRP003859	SRS117435	GSE24607: Lai - MLDmD32/BS26	GEO Series accession: GSE24607
SRR069829.S8.cell line S2+KCmix	SRR069829	GSM272651	modENCODE_741	S8	CTGTAGGCACCATCAATC	SRX029066	SRA025070	SRP003876	SRS117892	Drosophila melanogaster small RNA sequence: cell lines and imaginal disc	GEO Series accession: GSE10794
SRR488371..cell line ML-DmBG1-c1	SRR488371	GSM980233			CTGTAGGCACCATCAATC	SRX173121	SRA024725	SRP003832	SRS353010	GSE24303: Lai-ML-DmBG1-C1/BS176	GEO Series accession: GSE24303
SRR488698..cell line 118204H	SRR488698	GSM980238			CTGTAGGCACCATCAATC	SRX173210	SRA024730	SRP003837	SRS353099	GSE24302: Lai_1182-4Hcell/BS23	GEO Series accession: GSE24302
SRR546566.V027.cell line MLDmD21	SRR546566	GSM609249	modENCODE_3193	V027	CTGTAGGCACCATCAATC	SRX176121	SRA024729	SRP003836	SRS355597	GSE24301: Lai ‰ÛÒ ML-DmD21cell/BS90	GEO Series accession: GSE24301
SRR069228.S34.ecdysone KC	SRR069228	GSM609243	modENCODE_2974	S34	CTGTAGGCACCATCAATC	SRX028796	SRA024713	SRP003818	SRS117355	GSE24543: Kc-Rubin + Ecdysone smallRNA RNA-Seq	GEO Series accession: GSE24543
SRR069229.S35.ecdysone KC	SRR069229	GSM609244	modENCODE_2974	S35	CTGTAGGCACCATCAATC	SRX028797	SRA024713	SRP003818	SRS117356	GSE24543: Kc-Rubin + Ecdysone smallRNA RNA-Seq	GEO Series accession: GSE24543
SRR069230.S31.ecdysone S2	SRR069230	GSM609241	modENCODE_2973	S31	CTGTAGGCACCATCAATC	SRX028798	SRA024714	SRP003819	SRS117357	GSE24542: S2-Rubin + Ecdysone smallRNA RNA-Seq	GEO Series accession: GSE24542
SRR069231.S32.ecdysone S2	SRR069231	GSM609242	modENCODE_2973	S32	CTGTAGGCACCATCAATC	SRX028799	SRA024714	SRP003819	SRS117358	GSE24542: S2-Rubin + Ecdysone smallRNA RNA-Seq	GEO Series accession: GSE24542
SRR069840.S14.dev time point 0-1hr embryo #1	SRR069840	GSM286613	modENCODE_745	S14	CTGTAGGCACCATCAATC	SRX029077	SRA025073	SRP003879	SRS117903	Drosophila melanogaster small RNA sequence from 14 libraries	GEO Series accession: GSE11624
SRR069838.S12.dev time point 6-10hr embryo	SRR069838	GSM286607	modENCODE_754	S12	CTGTAGGCACCATCAATC	SRX029075	SRA025073	SRP003879	SRS117901	Drosophila melanogaster small RNA sequence from 14 libraries	GEO Series accession: GSE11624
SRR069839.S13.dev time point 6-10hr embryo #1	SRR069839	GSM286611	modENCODE_753	S13	CTGTAGGCACCATCAATC	SRX029076	SRA025073	SRP003879	SRS117902	Drosophila melanogaster small RNA sequence from 14 libraries	GEO Series accession: GSE11624
SRR014367.S7.dev time point 12-24hr embryo	SRR014367	GSM364902	modENCODE_2741	S7	CTGTAGGCACCATCAATC	SRX003183	SRA008251	SRP000602	SRS002320	Drosophila melanogaster larval, pupal and adult head small RNA libraries	GEO Series accession: GSE12840
SRR069234.V082.dev time point embryos,2-6 hr after egg laying (Celniker/RNA:217, 223) extraction1-2	SRR069234	GSM609238	modENCODE_2742	V082	CTGTAGGCACCATCAATC	SRX028802	SRA024717	SRP003822	SRS117361	GSE24539: Lai_embryo_2-6hr_BS43-46	GEO Series accession: GSE24539
SRR069262.V081.dev time point embryos,14-24 hr after egg laying (Celniker/RNA:253,259,265,277) extraction1-4	SRR069262	GSM609229	modENCODE_2743	V081	CTGTAGGCACCATCAATC	SRX028836	SRA024739	SRP003841	SRS117379	GSE24309: Lai_embryo_12-24hr_BS61-64-67-73	GEO Series accession: GSE24309
SRR069503.V001.non-irradiated embryo	SRR069503	GSM609239	modENCODE_2971	V001	CTGTAGGCACCATCAATC	SRX028908	SRA024986	SRP003854	SRS117430	GSE24540: Dm 2-18hr non-irradiated embryos smallRNA RNA-Seq	GEO Series accession: GSE24540
SRR069504.V002.irradiated embryo	SRR069504	GSM609240	modENCODE_2972	V002	CTGTAGGCACCATCAATC	SRX028909	SRA024987	SRP003855	SRS117431	GSE24541: Dm 2-18hr irradiated embryos smallRNA RNA-Seq	GEO Series accession: GSE24541
SRR013600.S18.dev time point 3rd instar larvae (1)	SRR013600	GSM322208	modENCODE_748	S18	CTGTAGGCACCATCAATC	SRX002667	SRA008172	SRP000602	SRS002172	Drosophila melanogaster larval, pupal and adult head small RNA libraries	GEO Series accession: GSE12840
SRR013602.S17.dev time point 3rd instar larvae (2)	SRR013602	GSM322245		S17	CTGTAGGCACCATCAATC	SRX002669	SRA008172	SRP000602	SRS002174	Drosophila melanogaster larval, pupal and adult head small RNA libraries	GEO Series accession: GSE12840
SRR013601.S19.dev time point 2-4 day old pupae (1)	SRR013601	GSM322219		S19	CTGTAGGCACCATCAATC	SRX002668	SRA008172	SRP000602	SRS002173	Drosophila melanogaster larval, pupal and adult head small RNA libraries	GEO Series accession: GSE12840
SRR013603.S20.dev time point 2-4 day old pupae (2)	SRR013603	GSM322338		S20	CTGTAGGCACCATCAATC	SRX002670	SRA008172	SRP000602	SRS002175	Drosophila melanogaster larval, pupal and adult head small RNA libraries	GEO Series accession: GSE12840
SRR351332..whole fly	SRR351332	GSM811191			ATCTCGTATGCCGTCTTCTGCTTG	SRX100238	SRA046915	SRP008774	SRS266387	Small RNA profiling in Drosophila wild-type and nbr[f02257] mutants	GEO Series accession: GSE32684

## Sheet: 2-dmestatistics
Name	collapsed unique sequences	total number of reads in library	reads mapped to dme rDNA	percentage of mapped reads to dme rDNA	reads mapped to UCSC Dme genome	percentage mapped to Dme genome	unique mappers mapped to Dme genome	multiple mappers mapped to Dme genome	Reads mapping to rRNA, tRNA, snRNA, snoRNA	miRBase miRNAs (plus ITS1 mIRNA)	hairpin siRNA	LTR element	LINE element	DNA element	percentage of mapped reads to transposons and hpRNA loci	type	dme rdna.18SrRNA sense reads	dme rdna.28SrRNA precursor region sense reads	dme rdna.28SrRNApart1 processed rRNA sense reads	dme rdna.28SrRNApart2 processed rRNA sense reads	28SrRNApart1+28SrRNApart2 sense reads	dme rdna.2SrRNA sense reads	dme rdna.5.8SrRNA sense reads	dme rdna.ITS1 sense reads	dme rdna.ITS1wohp sense reads	dme rdna.ITS2 sense reads	dme rdna.ITS2a sense reads	dme rdna.dmemirITS1hprDNA sense reads	dme rdna.dmemirITS1hprDNAmature5p sense reads	dme rdna.spacer sense reads	dme rdna.whole sense reads	percentage of ITS1 hairpin sense reads to whole rDNA minus 2S	percentage of ITS1 mature 5p sense reads to ITS1 hairpin	percentage of ITS1 hairpin to whole ITS1	18SrRNA sense reads to genome per million	28SrRNA percursor region sense reads to genome per million	28SrRNApart1 processed rRNA sense reads to genome per million	28SrRNApart2 processed rRNA sense reads to genome per million	28SrRNApart1+28SrRNApart2 sense reads to genome per million	2SrRNA sense reads to genome per million	5.8SrRNA sense reads to genome per million	ITS1 sense reads to genome per million	ITS1 without hairpin sense reads to genome per million	ITS2 sense reads to genome per million	ITS2a sense reads to genome per million	dmemirITS1hprDNA sense reads to genome per million	dmemirITS1hprDNAmature5p sense reads to genome per million	spacer sense reads to genome per million	whole dme rDNA sense reads to genome per million
V063V0632...combined V063 and V0632.CS,ovary,AGO1IP	4947781	38977405	295311	0.76	22130819	56.78	17952368	4178451	342863	21493773	50562	111490	87770	16045	1.20134	tissue and organs	44959	94569	34463	59178	93641	47607	3535	97872	139	96	0	97698	37820	456.998	293726	39.6954	38.7111	99.8222	2031.51	4273.18	1557.24	2674.01	4231.25	2151.16	159.732	4422.43	6.28083	4.33784	0	4414.57	1708.93	20.6498	13272.3
V064V0642...combined V064 and V0642.ago2[414], ovary, AGO1IP	5406080	38564969	180391	0.47	26875362	69.69	16583574	10291788	224193	19944690	124933	3631107	1684389	146555	20.7885	tissue and organs	33732	75356	23445	51508	74953	17842	2615	41270	553	157	0	40652	15859	1183	174498	25.9499	39.0116	98.5025	1255.13	2803.91	872.36	1916.55	2788.91	663.879	97.301	1535.61	20.5765	5.84178	0	1512.61	590.094	44.018	6492.86
V065V0652...combined V065 and V0652.dcr-2[L811fsX], ovary, AGO1IP	3512658	39907139	367522	0.92	26795776	67.15	21805971	4989805	411111	26364704	456	39985	38854	6423	0.319894	tissue and organs	68604	137101	50525	85096	135621	36542	3189	115717	119	73	0	115535	45875	369.002	367007	34.9613	39.7066	99.8427	2560.25	5116.52	1885.56	3175.72	5061.28	1363.72	119.011	4318.48	4.441	2.72431	0	4311.69	1712.02	13.7709	13696.4
V066V0662...combined V066 and V0662.r2d2[1], ovary, AGO1IP	6637564	39374100	203014	0.52	28599580	72.64	17559939	11039641	248400	19331100	101091	3892034	1714886	1483335	25.1449	tissue and organs	36608	72074	24708	46730	71438	17186	3158	54070	1508	240	0	52498	20923	2768	188502	30.644	39.8549	97.0927	1280.02	2520.11	863.929	1633.94	2497.87	600.918	110.421	1890.59	52.728	8.39173	0	1835.62	731.584	96.7846	6591.08
V097.SRR069232.GSM609246..CS ovary	6635235	31019658	1053538	3.4	20403750	65.78	12658073	7745677	1400065	12029514	55855	2802604	2532042	211890	27.4577	tissue and organs	162324	393709	152417	228976	381393	351259	34148	88255	901	2219	0	87022	48598	4664	1.04732e+06	12.5021	55.8456	98.6029	7955.6	19295.9	7470.05	11222.3	18692.3	17215.4	1673.61	4325.43	44.1585	108.755	0	4265	2381.82	228.585	51329.8
V0892.SRR073602.GSM628272.resequenced of V089.ago2[414] ovary total RNA	5478782	30765684	4288478	13.94	23076091	75.01	10196840	12879251	4862133	9246042	55894	4021906	3178729	188879	32.2646	tissue and organs	290314	728219	253676	461456	715132	3158347	29981	56618	2512	2583	0	53645	29042	4125.01	4.28343e+06	4.76808	54.1374	94.749	12580.7	31557.3	10993	19997.1	30990.2	136867	1299.22	2453.54	108.857	111.934	0	2324.7	1258.53	178.757	185622
V098.SRR069233.GSM609245..dcr-2[L811fsX] ovary	5289006	30329799	1559834	5.14	21418538	70.62	13004167	8414371	2043705	13459109	184	2415916	2112247	197828	22.0658	tissue and organs	247178	652551	244177	396041	640218	550818	34867	47209	1403	2222	0	45587	24571	5460.01	1.5544e+06	4.54241	53.8991	96.5642	11540.4	30466.6	11400.3	18490.6	29890.8	25716.9	1627.89	2204.12	65.504	103.742	0	2128.39	1147.18	254.92	72572.8
V0882.SRR073601.GSM628271.resequenced of V088.r2d2[1] ovary total RNA	5906402	29413521	2022978	6.88	22519982	76.56	11401639	11118343	2448543	11164788	84636	3581131	2492403	851836	31.1279	tissue and organs	591736	893070	294296	589543	883839	421200	31674	49578	2179	4076	0	47077	21300	6863	2.01802e+06	2.94817	45.245	94.9554	26276	39656.8	13068.2	26178.7	39246.9	18703.4	1406.48	2201.51	96.7585	180.995	0	2090.45	945.827	304.752	89610.2
SRR068998.S2.head female	194612	921184	23149	2.51	434988	47.22	363778	71210	37772	374058	1215	6872	2039	1492	2.67088	tissue and organs	4927	7946	2430	5509	7939	9464	245	375	7	6	0	367	172	26.0007	23139	2.68373	46.8665	97.8667	11326.7	18267.2	5586.36	12664.7	18251.1	21756.9	563.234	862.093	16.0924	13.7935	0	843.701	395.413	59.7734	53194.6
SRR013604.S22.head female	235952	1703608	76625	4.5	1080186	63.41	852232	227954	130530	864128	4152	26628	7159	3697	3.85452	tissue and organs	15522	24580	7592	16957	24549	34271	769	672	32	14	0	638	259	153	76602	1.50717	40.5956	94.9405	14369.7	22755.3	7028.42	15698.2	22726.6	31726.9	711.914	622.115	29.6245	12.9607	0	590.639	239.774	141.642	70915.6
SRR016854.S24.male body	780331	4071506	937308	23.02	2812297	69.07	1244352	1567945	1311234	869408	6383	33535	12617	6581	2.10205	tissue and organs	287075	573095	184645	388234	572879	62354	10933	1924	261	164	0	1660	936	275	937290	0.189728	56.3855	86.2786	102078	203782	65656.3	138049	203705	22171.9	3887.57	684.138	92.8067	58.3153	0	590.265	332.824	97.7847	333283
SRR018039.S23.female body	597322	1963101	373705	19.04	1158568	59.02	403203	755365	509702	237442	1715	110243	75308	9314	16.9675	tissue and organs	142987	204455	64822	139430	204252	19618	3722	1247	462	259	0	775	285	673.999	373457	0.219026	36.7742	62.1492	123417	176472	55950.1	120347	176297	16933	3212.59	1076.33	398.768	223.552	0	668.929	245.993	581.752	322344
SRR069835.S1.head male	128107	474570	7446	1.57	199954	42.13	169733	30221	15437	175985	428	1847	316	542	1.56686	tissue and organs	1442	2170	711	1453	2164	3651	46	49	2	0	0	47	19	8	7446	1.23847	40.4255	95.9184	7211.66	10852.5	3555.82	7266.67	10822.5	18259.2	230.053	245.056	10.0023	0	0	235.054	95.0219	40.0092	37238.6
SRR069836.S3.male body	321852	802004	115117	14.35	347504	43.33	148654	198850	166668	104576	1000	5130	1752	1045	2.56889	tissue and organs	34506	73439	24031	49365	73396	5613	1178	202	25	19	0	176	91	27.0003	115112	0.160732	51.7045	87.1287	99296.7	211333	69153.2	142056	211209	16152.3	3389.89	581.288	71.9416	54.6756	0	506.469	261.867	77.6978	331254
SRR069837.S4.female body	334388	906307	194026	21.41	556485	61.4	185697	370788	265678	96483	614	46169	31363	3895	14.7427	tissue and organs	83606	95414	30929	64361	95290	11950	1648	530	180	156	0	344	142	322.002	193892	0.189071	41.2791	64.9057	150239	171458	55579.2	115656	171236	21474.1	2961.45	952.407	323.459	280.331	0	618.166	255.173	578.636	348423
SRR069236.V090.male body	3086078	16503798	361910	2.19	6850924	41.51	6027108	823816	406195	6358188	5246	16023	6156	2424	0.435693	tissue and organs	88955	156101	51313	103096	154409	105230	2792	7295	12	34	0	7267	5494	130.002	361904	2.83122	75.602	99.6162	12984.4	22785.4	7489.94	15048.5	22538.4	15360	407.536	1064.82	1.75159	4.96283	0	1060.73	801.936	18.9758	52825.6
SRR069832.S5.Imaginal disc	285829	1327547	642426	48.39	1141239	85.97	220336	920903	774209	136367	6368	40723	31837	11160	7.89388	tissue and organs	311247	283529	41908	241452	283360	39649	6106	532	139	224	0	393	160	276	642419	0.065199	40.7125	73.8722	272727	248440	36721.5	211570	248292	34742.1	5350.33	466.16	121.797	196.278	0	344.363	140.199	241.842	562914
SRR016853.S21.imaginal disc brain	512994	2200223	975550	44.34	1737230	78.96	319019	1418211	1187475	171598	11876	65876	50574	18213	8.43521	tissue and organs	462642	451499	62205	388953	451158	50150	8698	670	218	364	0	449	152	484	975530	0.0485206	33.853	67.0149	266310	259896	35807	223893	259700	28867.8	5006.82	385.671	125.487	209.529	0	258.457	87.4956	278.604	561543
SRR031692..head	5038716	11486891	834701	7.27	2806216	24.43	1584337	1221879	1114079	1551763	9336	27102	2818	5492	1.5946	tissue and organs	82368	198607	54922	143128	198050	537942	11890	1273	165	623	0	1084	337	379	834037	0.366099	31.0886	85.1532	29352	70774	19571.6	51003.9	70575.5	191697	4237.02	453.636	58.798	222.007	0	386.285	120.091	135.057	297211
SRR031696..AGO1IP head	130677	1541576	27573	1.79	1266893	82.18	1171095	95798	43986	1210821	3125	307	33	126	0.283449	tissue and organs	9488	16019	5430	10497	15927	227	450	1144	15	6	0	1074	435	4.9999	27371	3.95668	40.5028	93.8811	7489.19	12644.3	4286.08	8285.62	12571.7	179.179	355.2	902.997	11.84	4.736	0	847.743	343.36	3.94658	21604.8
SRR032152..AGO1IP head	804969	6112870	69367	1.13	4120211	67.4	3849493	270718	103154	3981785	9694	656	112	237	0.259671	tissue and organs	25240	39551	12838	26577	39415	228	1430	2474	64	11	0	2286	1088	17.0001	69053	3.32147	47.5941	92.401	6125.9	9599.27	3115.86	6450.4	9566.26	55.337	347.07	600.455	15.5332	2.66977	0	554.826	264.064	4.12603	16759.6
SRR060644..ovary A2	1010965	3960286	950158	23.99	3418422	86.32	1134174	2284248	1101346	986483	6680	598150	448706	38007	31.9312	tissue and organs	298864	488502	154259	326601	480860	131651	20439	3131	614	1135	1	2471	1574	928.001	949373	0.302181	63.6989	78.9205	87427.5	142903	45125.8	95541.5	140667	38512.2	5979.07	915.92	179.615	332.025	0.292533	722.848	460.446	271.471	277723
SRR060647..AGO2 IP ovary A2	536761	5490677	3720986	67.77	5005052	91.16	530827	4474225	3996007	105824	23888	282447	142526	17313	9.31407	tissue and organs	557398	2049116	806539	1241283	2047822	833644	243231	1251	291	339	0	902	529	387	3.71998e+06	0.0312507	58.6475	72.1023	111367	409410	161145	248006	409151	166561	48597.1	249.947	58.1413	67.7316	0	180.218	105.693	77.3219	743244
V094....FLAG-IP from S2-R+, FLAG-HA-AGO2	8696830	31413129	846162	2.69	12402728	39.48	5336309	7066419	992957	2463154	201950	4409878	906007	86606	45.1872	cell lines	233905	552648	34837	516766	551603	37894	6414	1818	906	526	2	825	442	1220	835791	0.103397	53.5758	45.3795	18859.2	44558.6	2808.82	41665.5	44474.3	3055.3	517.144	146.581	73.0484	42.41	0.161255	66.5176	35.6373	98.3654	67387.7
V095....AGO1-IP from S2-R+, FLAG-HA-AGO2	2304567	29894459	126433	0.42	22467768	75.16	17207638	5260130	142942	21741365	35097	238343	50722	7972	1.47827	cell lines	20604	87362	7969	78987	86956	12038	615	4199	182	151	0	3979	3049	260.999	125569	3.50477	76.6273	94.7607	917.047	3888.33	354.686	3515.57	3870.26	535.79	27.3725	186.89	8.10049	6.72074	0	177.098	135.706	11.6166	5588.85
SRR013547.V020, SRR013548.V025 combined.cell line S2R+	1814922	10198534	152201	1.49	6776015	66.44	5316248	1459767	195945	5539926	21600	524703	68683	3447	9.1268	cell lines	12964	35050	20304	14331	34635	94284	2356	1211	90	51	0	1112	888	375.002	152049	1.92504	79.8561	91.8249	1913.22	5172.66	2996.45	2114.96	5111.41	13914.4	347.697	178.719	13.2821	7.52655	0	164.108	131.05	55.3426	22439.3
SRR1015573..GFP knockdown, AGO1IP, S2R+	1002883	36602530	428383	1.17	31474813	85.99	27335669	4139144	465594	30599188	113435	120391	20222	4222	0.820561	cell lines	27642	50332	16668	33348	50016	338698	2585	4864	592	83	1	4255	1868	693.998	426035	4.87193	43.9013	87.4794	878.226	1599.12	529.566	1059.51	1589.08	10760.9	82.1292	154.536	18.8087	2.63703	0.0317714	135.187	59.349	22.0493	13535.7
SRR1015574..dcr1 knockdown, AGO1IP, S2R+	1568782	45300554	885984	1.96	37942416	83.76	32187532	5754884	1030341	35613955	375595	365505	65609	11782	2.15719	cell lines	62408	96453	32632	62983	95615	704542	4761	7707	6187	158	0	1447	425	1805	881175	0.819213	29.3711	18.7751	1644.81	2542.09	860.04	1659.96	2520	18568.7	125.48	203.124	163.063	4.16421	0	38.1367	11.2012	47.5721	23224
SRR069830.S15.cell line S2-GMR	551865	2436703	376994	15.47	1488193	61.07	725026	763167	481054	476092	18324	211787	21653	1129	16.9933	cell lines	123417	174672	73419	101077	174496	61886	14404	541	230	168	0	305	171	381.001	376869	0.0968306	56.0656	56.3771	82930.8	117372	49334.3	67919.3	117254	41584.7	9678.85	363.528	154.55	112.889	0	204.947	114.904	256.016	253239
SRR013618.S30.cell line S2-GMR	675415	4022389	351302	8.73	2284680	56.8	1297304	987376	473067	920372	35520	363501	36578	2622	19.1808	cell lines	60377	121127	43760	77181	120941	144572	20084	662	162	72	0	500	261	1064	350790	0.242462	52.2	75.5287	26426.9	53017.1	19153.7	33782	52935.6	63278.9	8790.73	289.756	70.9071	31.5143	0	218.849	114.239	465.711	153540
SRR069831.S16.cell line KC	439913	2195055	174593	7.95	1026477	46.76	489982	536495	228101	446696	5151	240370	5407	1360	24.578	cell lines	42173	77754	16639	60950	77589	51104	1362	946	550	245	0	374	178	666.998	174509	0.303067	47.5936	39.5349	41085.2	75748.4	16209.8	59377.9	75587.7	49785.8	1326.87	921.599	535.813	238.68	0	364.353	173.409	649.793	170008
SRR016855.S33.cell line KC	772879	6748808	544749	8.07	3149153	46.66	1522583	1626570	715632	1494055	15256	547411	49095	9274	19.7207	cell lines	127010	247203	53331	193173	246504	157988	4841	2951	1573	518	0	1353	458	2392	543802	0.350687	33.8507	45.8489	40331.5	78498.3	16935	61341.3	78276.3	50168.4	1537.24	937.077	499.499	164.489	0	429.639	145.436	759.57	172682
SRR029028..cell line S2-NP mock	1073389	7098161	31284	0.44	3786716	53.35	2348149	1438567	57588	1503845	111291	1099263	42430	3743	33.1878	cell lines	4010	10557	4376	6037	10413	12977	1886	622	74	50	3	536	383	407.001	30840	3.00062	71.4552	86.1736	1058.97	2787.9	1155.62	1594.26	2749.88	3426.98	498.057	164.258	19.542	13.2041	0.792243	141.547	101.143	107.481	8144.26
SRR029029..dcr1 knocdown S2-NP	430804	3609774	17215	0.48	1670654	46.28	974788	695866	37987	399202	45201	527875	18349	1629	35.4983	cell lines	2146	6590	3076	3405	6481	7177	848	55	26	11	0	29	15	98.9996	17052	0.293671	51.7241	52.7273	1284.53	3944.56	1841.2	2038.12	3879.32	4295.92	507.586	32.9212	15.5628	6.58425	0	17.3585	8.97852	59.258	10206.8
SRR029030..dcr2 knockdown S2-NP	183252	2016994	18354	0.91	999345	49.55	717763	281582	30103	629232	5613	134913	4855	323	14.5799	cell lines	1723	4803	1905	2854	4759	10699	659	189	18	12	0	171	110	67	18266	2.25981	64.3275	90.4762	1724.13	4806.15	1906.25	2855.87	4762.12	10706	659.432	189.124	18.0118	12.0079	0	171.112	110.072	67.0439	18278
SRR029031..loqs knockdown S2-NP	719212	5699356	53626	0.94	2897973	50.85	2133206	764767	73569	1618054	4215	434322	18340	1240	15.8082	cell lines	4290	12168	6210	5853	12063	35496	926	186	61	26	0	117	104	185	53577	0.647088	88.8889	62.9032	1480.35	4198.8	2142.88	2019.69	4162.56	12248.6	319.534	64.1828	21.0492	8.97179	0	40.373	35.8872	63.8379	18487.8
SRR029032..r2d2 knockdown S2-NP	561488	4133250	20578	0.5	1939496	46.92	1182408	757088	35021	644209	42548	564800	17905	2283	32.3556	cell lines	2946	6988	3170	3694	6864	9125	857	163	37	14	0	126	97	176.001	20393	1.11821	76.9841	77.3006	1518.95	3603	1634.45	1904.62	3539.06	4704.83	441.867	84.0425	19.0771	7.21837	0	64.9653	50.013	90.7455	10514.6
SRR029033..lacZ knockdown S2-NP	448442	3191411	28466	0.89	1353439	42.41	788343	565096	44772	545182	36229	387552	13436	1421	32.4091	cell lines	2123	6440	2750	3581	6331	18320	933	169	41	27	0	123	100	87	28302	1.23222	81.3008	72.7811	1568.6	4758.25	2031.86	2645.85	4677.71	13535.9	689.355	124.867	30.2932	19.9492	0	90.8796	73.8859	64.2807	20911.2
SRR032092..cell line S2-NP mock oxidized	619615	7154737	13301	0.19	3705038	51.78	1636052	2068986	20743	87313	219133	1796127	74097	7542	56.5959	cell lines	2697	5730	2217	3384	5601	2991	390	144	44	73	0	94	54	368	12446	0.994183	57.4468	65.2778	727.928	1546.54	598.374	913.351	1511.73	807.279	105.262	38.866	11.8757	19.7029	0	25.3709	14.5747	99.3241	3359.21
SRR032093..ago1 knockdown S2-NP	652646	3527518	25065	0.71	1337101	37.9	841914	495187	41801	385527	48795	322096	15853	1099	29.0063	cell lines	3107	11492	5851	5497	11348	7959	1736	175	32	34	0	141	89	176	24903	0.832153	63.1206	80.5714	2323.68	8594.71	4375.88	4111.13	8487.02	5952.43	1298.33	130.88	23.9324	25.4281	0	105.452	66.5619	131.628	18624.6
SRR032094..ago2 knockdown S2-NP	517723	4328783	28010	0.65	1453706	33.58	746441	707265	43803	497100	16143	548971	24851	1271	40.6709	cell lines	4601	11679	5159	6379	11538	9259	1555	202	97	65	0	99	79	244.001	27800	0.533952	79.798	49.0099	3165.01	8033.95	3548.86	4388.09	7936.96	6369.24	1069.68	138.955	66.726	44.7133	0	68.1018	54.3439	167.847	19123.5
SRR032095..dcr2 knockdown AGO1IP S2-NP	176667	6550299	13489	0.21	5865577	89.55	4931948	933629	15779	5736754	1509	46056	1371	397	0.84106	cell lines	4265	3111	1287	1776	3063	5398	295	307	1	3	1	303	281	4.0002	13474	3.75186	92.7393	98.6971	727.124	530.383	219.416	302.784	522.199	920.285	50.2934	52.3393	0.170486	0.511459	0.170486	51.6573	47.9066	0.681979	2297.13
SRR032096..dcr2 knockdown AGO2IP S2-NP	1016058	6734365	116526	1.73	3743119	55.58	2136877	1606242	133108	130181	10254	1384990	44548	7281	38.6596	cell lines	47397	41618	14759	26077	40836	23665	2924	48	23	5	0	25	18	14.0003	115890	0.0271076	72	52.0833	12662.4	11118.5	3942.97	6966.65	10909.6	6322.27	781.167	12.8235	6.14461	1.33578	0	6.67892	4.80882	3.74028	30960.8
SRR015372.V067.cell line S2-NP	2802601	9872219	65941	0.67	4376273	44.33	3605954	770319	93702	3825994	18360	212857	10899	721	5.54895	cell lines	6322	12132	4133	7676	11809	43170	1866	1070	74	95	0	984	669	143.002	65869	4.33499	67.9878	91.9626	1444.61	2772.22	944.411	1754	2698.41	9864.56	426.39	244.5	16.9094	21.708	0	224.849	152.87	32.6766	15051.4
SRR019717.OSS2.cell line OSS	1984546	5612344	48534	0.86	3836300	68.35	1927543	1908757	126103	993424	42887	1728866	80835	6199	48.4526	cell lines	28753	8400	2759	5312	8071	5306	1404	1422	731	1418	0	599	265	1285	48366	1.39108	44.2404	42.1238	7494.98	2189.61	719.183	1384.67	2103.85	1383.1	365.978	370.67	190.548	369.627	0	156.14	69.077	334.957	12607.5
SRR019718.OSS6.cell line OSS	2051568	5868645	52658	0.9	4004943	68.24	2010845	1994098	134104	1029503	40353	1808127	85051	6689	48.4456	cell lines	31512	9054	2991	5677	8668	5409	1442	1496	769	1559	0	629	288	1437	52514	1.33531	45.787	42.0455	7868.28	2260.71	746.827	1417.5	2164.33	1350.58	360.055	373.538	192.013	389.269	0	157.056	71.9111	358.806	13112.3
SRR019719.OSS7.cell line OSS	1577627	4364092	40399	0.93	3038153	69.62	1520991	1517162	102196	793383	36601	1366076	64243	5012	48.4483	cell lines	24776	6635	2172	4204	6376	4281	1063	1113	601	1074	0	441	187	966	40277	1.22514	42.4036	39.6226	8154.95	2183.89	714.908	1383.74	2098.64	1409.08	349.884	366.341	197.818	353.504	0	145.154	61.5506	317.956	13257.1
SRR019720.OSS8.cell line OSS	1888006	4867534	43460	0.89	3180441	65.34	1618280	1562161	108452	798194	23449	1433145	68697	5733	48.1387	cell lines	25208	8060	2780	4883	7663	4151	1090	1391	728	1538	0	562	222	1383	43319	1.43484	39.5018	40.4026	7925.94	2534.24	874.093	1535.32	2409.41	1305.16	342.72	437.361	228.899	483.581	0	176.705	69.8016	434.844	13620.4
SRR023197..cell line S2	47306	1676003	708777	42.29	1430899	85.38	687025	743874	720137	679552	425	20945	2644	63	1.68265	cell lines	8435	10753	3601	7117	10718	687023	1213	19	8	46	0	11	6	29	708727	0.0506819	54.5455	57.8947	5894.9	7514.86	2516.6	4973.8	7490.4	480134	847.719	13.2784	5.59089	32.1476	0	7.68747	4.19317	20.267	495302
SRR028728.V018.cell line KC167	794851	6284230	85803	1.37	4795316	76.31	3917744	877572	109698	4371978	14932	172325	14168	4528	4.29488	cell lines	7041	28606	16604	11917	28521	38114	1081	9487	152	63	0	9315	6597	688.001	85749	19.5549	70.8213	98.187	1468.31	5965.4	3462.55	2485.13	5947.68	7948.17	225.428	1978.39	31.6976	13.1378	0	1942.52	1375.72	143.474	17881.8
SRR028729.V024.cell line KC167	1071702	5371965	42424	0.79	3231226	60.15	2684798	546428	62338	2844827	24463	169205	14403	4484	6.57815	cell lines	6575	17332	6284	10355	16639	10145	3603	3444	164	96	0	3261	1705	479.999	42324	10.1339	52.2846	94.6864	2034.83	5363.91	1944.77	3204.67	5149.44	3139.68	1115.06	1065.85	50.7547	29.7101	0	1009.21	527.663	148.55	13098.4
SRR069243.V076.cell line MLDmBG3-c2	4485268	15406003	143594	0.93	5832727	37.86	4657006	1175721	198721	5120899	14982	270197	20969	3191	5.30351	cell lines	7599	23957	7342	15867	23209	94010	1108	11206	243	2537	0	10865	8285	526.005	143453	21.9748	76.254	96.957	1302.82	4107.34	1258.76	2720.34	3979.1	16117.7	189.963	1921.23	41.6615	434.959	0	1862.77	1420.43	90.1817	24594.5
SRR069246.V075.cell line MLDmBG1-c1	11875841	20289566	29614	0.15	1067341	5.26	890806	176535	56970	919423	718	42639	3477	1463	4.52498	cell lines	1808	6756	2451	4169	6620	17388	497	2254	86	138	0	2133	1517	418.002	29575	17.5023	71.1205	94.6318	1693.93	6329.75	2296.36	3905.97	6202.33	16291	465.643	2111.79	80.5741	129.293	0	1998.42	1421.29	391.629	27709
SRR069255.V019.cell line GM2	1638809	7458567	815897	10.94	3582460	48.03	2292495	1289965	908934	2458995	5916	147956	2688	627	4.38768	cell lines	42700	647654	519522	128067	647589	116316	5021	1517	283	407	0	1227	931	781.997	815716	0.175436	75.8761	80.8833	11919.2	180785	145018	35748.3	180767	32468.2	1401.55	423.452	78.996	113.609	0	342.502	259.877	218.285	227697
SRR069256.V021.cell line MLDmD21	649571	4933916	146377	2.97	3319632	67.28	2556539	763093	183422	3029230	3409	50281	3183	721	1.73495	cell lines	7642	33304	5687	27563	33250	90753	1043	10104	40	36	0	10059	8209	232	146369	18.0865	81.6085	99.5546	2302.06	10032.4	1713.14	8303.03	10016.2	27338.3	314.191	3043.71	12.0495	10.8446	0	3030.16	2472.86	69.8873	44091.9
SRR069257.V026.cell line 1182-4H	598998	4495689	30162	0.67	3051755	67.88	2305609	746146	40012	2783989	5987	178229	2614	848	6.14984	cell lines	3171	8420	2722	5228	7950	14320	1768	1597	16	17	0	1578	1089	110	30155	9.96527	69.0114	98.8103	1039.07	2759.07	891.946	1713.11	2605.06	4692.38	579.339	523.305	5.24288	5.57057	0	517.08	356.844	36.0448	9881.2
SRR069258.V010.cell line MLDmD20c5	2336377	8186297	67951	0.83	2109689	25.77	1757766	351923	98243	1871712	2692	86068	9712	1019	4.71591	cell lines	4274	7238	2787	4413	7200	47451	371	5476	140	73	0	5324	3545	566.001	67848	26.1019	66.5853	97.2243	2025.89	3430.84	1321.05	2091.78	3412.83	22491.9	175.855	2595.64	66.3605	34.6023	0	2523.59	1680.34	268.286	32160.2
SRR069259.V011.cell line Sg4	800872	4801880	78101	1.63	2509474	52.26	1735628	773846	93348	2216960	2063	153009	12509	293	6.68961	cell lines	3351	6218	1919	4285	6204	64002	277	1051	59	51	0	988	682	327.999	78034	7.04105	69.0283	94.0057	1335.34	2477.81	764.702	1707.53	2472.23	25504.1	110.382	418.813	23.5109	20.323	0	393.708	271.77	130.704	31095.8
SRR069271.V009.cell line CMEL1	798319	5533126	104224	1.88	3720599	67.24	3077090	643509	131257	3477049	1775	73051	3188	449	2.10888	cell lines	5609	19753	6609	13033	19642	70951	1242	3519	70	31	0	3446	2347	390.996	104194	10.3661	68.108	97.9255	1507.55	5309.09	1776.33	3502.93	5279.26	19069.8	333.817	945.815	18.8142	8.33199	0	926.195	630.812	105.09	28004.6
SRR069299.V028.cell line CMEW1Cl.8+	838250	4314325	72774	1.69	2234973	51.8	1815589	419384	98058	1991158	1132	99894	1255	180	4.58444	cell lines	6855	35437	11721	23191	34912	22666	3664	2635	81	116	0	2538	1643	361.999	72688	5.07377	64.736	96.3188	3067.15	15855.7	5244.36	10376.4	15620.8	10141.5	1639.39	1178.99	36.242	51.9022	0	1135.58	735.132	161.97	32523
SRR069300.V033.cell line CMEW1Cl.8+	1612062	6804401	146261	2.15	2895196	42.55	2059630	835566	214321	2308825	2197	296778	2313	355	10.4187	cell lines	14103	76353	18228	57383	75611	48137	2421	2833	140	219	0	2641	1597	623.999	146053	2.69721	60.4695	93.2227	4871.17	26372.3	6295.95	19820.1	26116	16626.5	836.213	978.518	48.356	75.6425	0	912.201	551.603	215.529	50446.7
SRR069506.V029.cell line ML-DmD9	714668	4233306	50053	1.18	2645196	62.49	2110761	534435	90705	2369508	9685	101119	3831	422	4.34966	cell lines	3729	9255	2944	5864	8808	30893	1822	3283	59	48	0	3221	2177	314.001	50019	16.8409	67.5877	98.1115	1409.73	3498.8	1112.96	2216.85	3329.81	11678.9	688.796	1241.12	22.3046	18.1461	0	1217.68	823.001	118.706	18909.4
SRR069508.V035.cell line MLDmD32	690237	5711204	70576	1.24	4437184	77.69	3503049	934135	112913	4070709	3583	128064	9221	1056	3.19852	cell lines	9364	14249	3971	9667	13638	34603	1480	8221	174	69	0	8030	4748	766.004	70568	22.3273	59.1283	97.6767	2110.35	3211.27	894.937	2178.63	3073.57	7798.41	333.545	1852.75	39.2141	15.5504	0	1809.71	1070.05	172.633	15903.8
SRR069829.S8.cell line S2+KCmix	197523	715383	60362	8.44	390321	54.56	221205	169116	81127	189837	4086	52450	5174	709	15.9917	cell lines	14793	25574	7071	18447	25518	17934	1167	262	129	63	0	129	66	271	60279	0.30464	51.1628	49.2366	37899.6	65520.4	18115.9	47261.1	65377	45946.8	2989.85	671.242	330.497	161.406	0	330.497	169.092	694.301	154434
SRR488371..cell line ML-DmBG1-c1	7391772	43590393	216438	0.5	4000634	9.18	3044273	956361	310688	3489735	1878	93982	11432	3353	2.76569	cell lines	4965	18746	6913	11687	18600	185644	1577	3557	127	96	0	3415	2777	426.001	216273	11.1496	81.3177	96.0079	1241.05	4685.76	1727.98	2921.29	4649.26	46403.6	394.188	889.109	31.745	23.9962	0	853.615	694.14	106.483	54059.7
SRR488698..cell line 118204H	4379257	36474151	657028	1.8	24666416	67.63	14884388	9782028	786484	21140615	31739	2403130	32014	11303	10.0468	cell lines	26946	88005	34236	51344	85580	489788	6858	27165	198	130	0	26926	20677	1886	656875	16.115	76.7919	99.1202	1092.42	3567.81	1387.96	2081.53	3469.49	19856.5	278.03	1101.29	8.02711	5.27032	0	1091.61	838.265	76.4603	26630.3
SRR546566.V027.cell line MLDmD21	411445	4562525	159567	3.5	3709141	81.3	2845080	864061	213977	3356846	2082	73198	2440	371	2.10537	cell lines	7918	18722	4458	13535	17993	117878	6897	5558	40	68	0	5510	3997	352	159559	13.2195	72.5408	99.1364	2134.73	5047.53	1201.9	3649.09	4850.99	31780.4	1859.46	1498.46	10.7842	18.3331	0	1485.52	1077.61	94.9007	43017.8
SRR069228.S34.ecdysone KC	468404	1945813	133805	6.88	839286	43.13	347651	491635	184380	326684	2949	144413	57955	10199	25.6785	cell lines	36865	62366	15564	46581	62145	30451	1456	1358	555	102	0	789	231	533.996	133429	0.766183	29.2776	58.1001	43924.2	74308.4	18544.3	55500.7	74045.1	36282	1734.81	1618.04	661.276	121.532	0	940.085	275.234	636.25	158979
SRR069229.S35.ecdysone KC	361057	2152605	223717	10.39	994581	46.2	449250	545331	298347	456649	4658	93581	4930	1638	10.5378	cell lines	62796	120693	30137	90248	120385	34676	2055	1472	942	403	0	520	196	994.998	223393	0.275545	37.6923	35.3261	63138.1	121351	30301.2	90739.7	121041	34864.9	2066.2	1480.02	947.133	405.196	0	522.833	197.068	1000.42	224610
SRR069230.S31.ecdysone S2	811705	4139612	373962	9.03	2267400	54.77	1289083	978317	505267	1004026	24750	304002	35983	1871	16.1686	cell lines	90272	143271	47310	95699	143009	119319	15905	765	288	201	0	469	238	972.997	373484	0.184526	50.7463	61.3072	39813	63187.4	20865.3	42206.5	63071.8	52623.7	7014.64	337.391	127.018	88.6478	0	206.845	104.966	429.125	164719
SRR069231.S32.ecdysone S2	975692	6336625	628423	9.92	3683000	58.12	2048157	1634843	851272	1616347	48151	475372	56992	4130	15.8742	cell lines	145897	248962	70405	178251	248656	185063	39874	1251	452	260	0	796	479	1969	627723	0.179822	60.1759	63.6291	39613.6	67597.6	19116.2	48398.3	67514.5	50247.9	10826.5	339.669	122.726	70.5946	0	216.128	130.057	534.618	170438
SRR069840.S14.dev time point 0-1hr embryo #1	991145	2419254	157298	6.5	1745210	72.14	514131	1231079	216817	211056	784	609941	377602	57343	59.9166	developmental timing	34357	42405	13465	28321	41786	70073	2898	4067	1138	124	0	2841	618	857.003	156165	3.29996	21.7529	69.8549	19686.5	24297.9	7715.4	16227.8	23943.3	40151.6	1660.55	2330.38	652.071	71.0516	0	1627.88	354.112	491.06	89482.1
SRR069838.S12.dev time point 6-10hr embryo	438252	1939521	90450	4.66	1093089	56.36	477215	615874	115465	359772	270	277320	171070	25399	43.3687	developmental timing	19757	17426	6710	10392	17102	48715	718	1663	565	113	0	1076	343	716	89716	2.62433	31.8773	64.7023	18074.5	15942	6138.57	9507	15645.6	44566.4	656.854	1521.38	516.884	103.377	0	984.366	313.79	655.024	82075.7
SRR069839.S13.dev time point 6-10hr embryo #1	474367	1632673	182667	11.19	1021856	62.59	424183	597673	217940	343294	342	203489	127980	18127	34.2453	developmental timing	68589	40169	16728	23212	39940	69633	1271	1117	395	122	0	707	262	562.002	182253	0.627775	37.058	63.2945	67122	39309.8	16370.2	22715.5	39085.7	68143.7	1243.82	1093.11	386.552	119.391	0	691.878	256.396	549.982	178355
SRR014367.S7.dev time point 12-24hr embryo	131699	473222	183808	38.84	395169	83.51	131719	263450	229930	99531	65	16019	9379	1592	6.84644	developmental timing	123089	48036	17434	30515	47949	10471	708	468	297	154	0	170	48	431	183775	0.0980935	28.2353	36.3248	311484	121558	44117.8	77220.1	121338	26497.5	1791.64	1184.3	751.577	389.707	0	430.196	121.467	1090.67	465054
SRR069234.V082.dev time point embryos,2-6 hr after egg laying (Celniker/RNA:217, 223) extraction1-2	3649134	15654573	990831	6.33	10393057	66.39	5358559	5034498	1242834	4932774	1679	1772941	1052110	148196	28.6242	developmental timing	250300	468393	185965	263523	449488	150812	52469	22173	2017	631	1	19787	12279	9086	959615	2.44645	62.0559	89.2392	24083.4	45067.9	17893.2	25355.7	43248.9	14510.8	5048.47	2133.44	194.072	60.7136	0.0962181	1903.87	1181.46	874.238	92332.3
SRR069262.V081.dev time point embryos,14-24 hr after egg laying (Celniker/RNA:253,259,265,277) extraction1-4	919748	8111217	53421	0.66	5243358	64.64	4114890	1128468	59769	5183949	62	5805	5551	937	0.235631	developmental timing	9387	17979	6774	11023	17797	4854	436	19913	17	13	0	19888	9743	54.0007	53346	41.0129	48.9893	99.8745	1790.26	3428.91	1291.92	2102.28	3394.2	925.743	83.1528	3797.76	3.2422	2.47933	0	3792.99	1858.16	10.2989	10174
SRR069503.V001.non-irradiated embryo	1025620	3582679	474417	13.24	2414976	67.41	1311247	1103729	699435	1310242	312	120729	73656	10613	8.50153	developmental timing	179634	220875	64893	155129	220022	57488	4899	3374	936	2937	0	2382	1301	1955	474096	0.571761	54.618	70.5987	74383.3	91460.5	26871.1	64236.2	91107.3	23804.8	2028.59	1397.12	387.581	1216.16	0	986.345	538.722	809.532	196315
SRR069504.V002.irradiated embryo	870748	2857815	374119	13.09	1888213	66.07	973874	914339	553542	947943	328	89807	60184	7443	8.3551	developmental timing	104874	212295	50048	161920	211968	42325	6127	2814	1243	2398	0	1545	772	1666	373946	0.465893	49.9676	54.9041	55541.4	112432	26505.5	85753	112259	22415.4	3244.87	1490.3	658.294	1269.98	0	818.234	408.852	882.315	198042
SRR013600.S18.dev time point 3rd instar larvae (1)	324747	2481500	1598351	64.41	1980086	79.79	100912	1879174	1869016	68246	309	4188	687	281	0.275998	developmental timing	522134	965244	375880	589066	964946	82193	27247	81	5	7	0	75	30	19.0009	1.59834e+06	0.00494676	40	92.5926	263693	487476	189830	297495	487325	41509.8	13760.5	40.9073	2.52514	3.5352	0	37.8771	15.1509	9.596	807206
SRR013602.S17.dev time point 3rd instar larvae (2)	158647	568715	119229	20.96	258840	45.51	97936	160904	145653	83477	400	2491	755	432	1.57549	developmental timing	50085	58574	24415	34129	58544	8628	1399	215	60	25	0	155	80	88.0001	119226	0.140147	51.6129	72.093	193498	226294	94324.7	131854	226178	33333.3	5404.88	830.629	231.803	96.5848	0	598.826	309.071	339.979	460617
SRR013601.S19.dev time point 2-4 day old pupae (1)	355299	2042473	388939	19.04	936734	45.86	401649	535085	479368	353306	1706	9711	3751	2201	1.85421	developmental timing	182897	164017	65373	98564	163937	36266	3997	641	131	87	0	510	229	267.002	388932	0.144613	44.902	79.5632	195250	175095	69788.2	105221	175009	38715.4	4266.95	684.292	139.848	92.8759	0	544.445	244.466	285.035	415200
SRR013603.S20.dev time point 2-4 day old pupae (2)	297022	2042234	1259099	61.65	1577857	77.26	78475	1499382	1489914	47673	324	3846	563	255	0.316125	developmental timing	420641	756657	283336	473052	756388	58488	22311	81	14	6	0	67	34	32.0011	1.25909e+06	0.00558053	50.7463	82.716	266590	479547	179570	299807	479377	37068	14140.1	51.3355	8.87279	3.80263	0	42.4627	21.5482	20.2814	797975
SRR351332..whole fly	922142	17936396	2067315	11.53	13868036	77.32	10611237	3256799	2361000	10411599	12804	434556	333514	55919	6.03397	developmental timing	109146	277132	77784	189116	266900	1632971	25531	12311	109	184	0	12192	9101	568.999	2.06229e+06	2.83982	74.6473	99.0334	7870.33	19983.5	5608.87	13636.8	19245.7	117751	1841	887.725	7.8598	13.2679	0	879.144	656.257	41.0295	148708

## Sheet: 3-mmulibraries
Name	Run	GSMnumber	Adapter3prime	Experiment	Submission	Study Accession	Sample	SampleName	Study Title	BioProject
SRR640602.GSM1057530: ES_NI; Mus musculus; RNA-Seq	SRR640602	GSM1057530	TGGAATTCTCGGGTGCCAAGG	SRX212694	SRA063218	SRP017691	SRS381552	GSM1057530	GSE43153: Evidence for antiviral RNA interference in mammals	GEO Series accession: GSE43153
SRR640603.GSM1057531: ES_EMCV 3hrs; Mus musculus; RNA-Seq	SRR640603	GSM1057531	TGGAATTCTCGGGTGCCAAGG	SRX212695	SRA063218	SRP017691	SRS381553	GSM1057531	GSE43153: Evidence for antiviral RNA interference in mammals	GEO Series accession: GSE43153
SRR640604.GSM1057532: ES_EMCV 6hrs; Mus musculus; RNA-Seq	SRR640604	GSM1057532	TGGAATTCTCGGGTGCCAAGG	SRX212696	SRA063218	SRP017691	SRS381554	GSM1057532	GSE43153: Evidence for antiviral RNA interference in mammals	GEO Series accession: GSE43153
SRR640605.GSM1057533: ES_D0 INF; Mus musculus; RNA-Seq	SRR640605	GSM1057533	TGGAATTCTCGGGTGCCAAGG	SRX212697	SRA063218	SRP017691	SRS381555	GSM1057533	GSE43153: Evidence for antiviral RNA interference in mammals	GEO Series accession: GSE43153
SRR640606.GSM1057534: ES_D10 NI; Mus musculus; RNA-Seq	SRR640606	GSM1057534	TGGAATTCTCGGGTGCCAAGG	SRX212698	SRA063218	SRP017691	SRS381556	GSM1057534	GSE43153: Evidence for antiviral RNA interference in mammals	GEO Series accession: GSE43153
SRR640607.GSM1057535: ES_D10 INF; Mus musculus; RNA-Seq	SRR640607	GSM1057535	TGGAATTCTCGGGTGCCAAGG	SRX212699	SRA063218	SRP017691	SRS381557	GSM1057535	GSE43153: Evidence for antiviral RNA interference in mammals	GEO Series accession: GSE43153
SRR640612.GSM1057540: IP_mAGO2_INF; Mus musculus; RNA-Seq	SRR640612	GSM1057540	TGGAATTCTCGGGTGCCAAGG	SRX212704	SRA063218	SRP017691	SRS381562	GSM1057540	GSE43153: Evidence for antiviral RNA interference in mammals	GEO Series accession: GSE43153
SRR640614.GSM1057542: ES_NoV; Mus musculus; RNA-Seq	SRR640614	GSM1057542	TGGAATTCTCGGGTGCCAAGG	SRX212706	SRA063218	SRP017691	SRS381564	GSM1057542	GSE43153: Evidence for antiviral RNA interference in mammals	GEO Series accession: GSE43153
SRR640615.GSM1057543: ES_NoVÃ«Ã“B2; Mus musculus; RNA-Seq	SRR640615	GSM1057543	TGGAATTCTCGGGTGCCAAGG	SRX212707	SRA063218	SRP017691	SRS381565	GSM1057543	GSE43153: Evidence for antiviral RNA interference in mammals	GEO Series accession: GSE43153
SRR037904.GSM510440: brain_rep1	SRR037904	GSM510440	TCGTATGCCGTCTTCTGCTTG	SRX017753	SRA012228	SRP002118	SRS025205	GSM510440	Mammalian microRNAs: Experimental evaluation of novel and previously annotated genes	GEO Series accession: GSE20384
SRR037905.GSM510441: brain_rep2	SRR037905	GSM510441	TCGTATGCCGTCTTCTGCTTG	SRX017754	SRA012228	SRP002118	SRS025206	GSM510441	Mammalian microRNAs: Experimental evaluation of novel and previously annotated genes	GEO Series accession: GSE20384
SRR037906.GSM510442: brain_rep3	SRR037906	GSM510442	TCGTATGCCGTCTTCTGCTTG	SRX017755	SRA012228	SRP002118	SRS025207	GSM510442	Mammalian microRNAs: Experimental evaluation of novel and previously annotated genes	GEO Series accession: GSE20384
SRR037907.GSM510443: brain_rep4	SRR037907	GSM510443	TCGTATGCCGTCTTCTGCTTG	SRX017756	SRA012228	SRP002118	SRS025208	GSM510443	Mammalian microRNAs: Experimental evaluation of novel and previously annotated genes	GEO Series accession: GSE20384
SRR037919.GSM510457: e12p5_rep1	SRR037919	GSM510457	TCGTATGCCGTCTTCTGCTTG	SRX017768	SRA012228	SRP002118	SRS025220	GSM510457	Mammalian microRNAs: Experimental evaluation of novel and previously annotated genes	GEO Series accession: GSE20384
SRR037920.GSM510458: e12p5_rep2	SRR037920	GSM510458	TCGTATGCCGTCTTCTGCTTG	SRX017769	SRA012228	SRP002118	SRS025221	GSM510458	Mammalian microRNAs: Experimental evaluation of novel and previously annotated genes	GEO Series accession: GSE20384
SRR037921.GSM510459: e12p5_rep3	SRR037921	GSM510459	TCGTATGCCGTCTTCTGCTTG	SRX017770	SRA012228	SRP002118	SRS025222	GSM510459	Mammalian microRNAs: Experimental evaluation of novel and previously annotated genes	GEO Series accession: GSE20384
SRR037922.GSM510460: e12p5_rep4	SRR037922	GSM510460	TCGTATGCCGTCTTCTGCTTG	SRX017771	SRA012228	SRP002118	SRS025223	GSM510460	Mammalian microRNAs: Experimental evaluation of novel and previously annotated genes	GEO Series accession: GSE20384
SRR037923.GSM510461: e9p5_rep1	SRR037923	GSM510461	TCGTATGCCGTCTTCTGCTTG	SRX017772	SRA012228	SRP002118	SRS025224	GSM510461	Mammalian microRNAs: Experimental evaluation of novel and previously annotated genes	GEO Series accession: GSE20384
SRR037924.GSM510462: e9p5_rep2	SRR037924	GSM510462	TCGTATGCCGTCTTCTGCTTG	SRX017773	SRA012228	SRP002118	SRS025225	GSM510462	Mammalian microRNAs: Experimental evaluation of novel and previously annotated genes	GEO Series accession: GSE20384
SRR037925.GSM510463: e9p5_rep3	SRR037925	GSM510463	TCGTATGCCGTCTTCTGCTTG	SRX017774	SRA012228	SRP002118	SRS025226	GSM510463	Mammalian microRNAs: Experimental evaluation of novel and previously annotated genes	GEO Series accession: GSE20384
SRR037926.GSM510464: e9p5_rep4	SRR037926	GSM510464	TCGTATGCCGTCTTCTGCTTG	SRX017775	SRA012228	SRP002118	SRS025227	GSM510464	Mammalian microRNAs: Experimental evaluation of novel and previously annotated genes	GEO Series accession: GSE20384
SRR037927.GSM510465: e7p5_rep1	SRR037927	GSM510465	TCGTATGCCGTCTTCTGCTTG	SRX017776	SRA012228	SRP002118	SRS025228	GSM510465	Mammalian microRNAs: Experimental evaluation of novel and previously annotated genes	GEO Series accession: GSE20384
SRR037928.GSM510466: e7p5_rep2	SRR037928	GSM510466	TCGTATGCCGTCTTCTGCTTG	SRX017777	SRA012228	SRP002118	SRS025229	GSM510466	Mammalian microRNAs: Experimental evaluation of novel and previously annotated genes	GEO Series accession: GSE20384
SRR037929.GSM510467: e7p5_rep3	SRR037929	GSM510467	TCGTATGCCGTCTTCTGCTTG	SRX017778	SRA012228	SRP002118	SRS025230	GSM510467	Mammalian microRNAs: Experimental evaluation of novel and previously annotated genes	GEO Series accession: GSE20384
SRR037930.GSM510468: e7p5_rep4	SRR037930	GSM510468	TCGTATGCCGTCTTCTGCTTG	SRX017779	SRA012228	SRP002118	SRS025231	GSM510468	Mammalian microRNAs: Experimental evaluation of novel and previously annotated genes	GEO Series accession: GSE20384
SRR038741.GSM527276: DGCR8_wt_hippocampus	SRR038741	GSM527276	TCGTATGCCGTCTTCTGCTTG	SRX018285	SRA012310	SRP002171	SRS041846	GSM527276	Functional non-canonical microRNAs in the mammalian hippocampus and cortex	GEO Series accession: GSE21090
SRR038744.GSM527279: DGCR8_wt_cortex	SRR038744	GSM527279	TCGTATGCCGTCTTCTGCTTG	SRX018288	SRA012310	SRP002171	SRS041849	GSM527279	Functional non-canonical microRNAs in the mammalian hippocampus and cortex	GEO Series accession: GSE21090
SRR039610.GSM527274: DICER_wt_hippocampus	SRR039610	GSM527274	TCGTATGCCGTCTTCTGCTTG	SRX018283	SRA012310	SRP002171	SRS041844	GSM527274	Functional non-canonical microRNAs in the mammalian hippocampus and cortex	GEO Series accession: GSE21090
SRR040488.GSM533911: E18.5 wild type LIVER small RNA	SRR040488	GSM533911	CTGTAGGCACCATCAATCGTATGCCGTCTTCTGCTTG	SRX019620	SRA012598	SRP002375	SRS065791	GSM533911	Small RNA profile in E18.5 fetal liver from wild type and Ago2 catalytically inactive mutant mice	GEO Series accession: GSE21370
SRR042477.GSM539869: mouse brain tissue [09-002]	SRR042477	GSM539869	TCGTATGCCGTCTTCTGCTTG	SRX020071	SRA012686	SRP002412	SRS066254	GSM539869	Regulation of microRNA Expression and Abundance during Lymphopoiesis	GEO Series accession: GSE21630
SRR042482.GSM539874: mouse skin tissue [09-002]	SRR042482	GSM539874	TCGTATGCCGTCTTCTGCTTG	SRX020076	SRA012686	SRP002412	SRS066259	GSM539874	Regulation of microRNA Expression and Abundance during Lymphopoiesis	GEO Series accession: GSE21630
SRR069834.GSM304914: Analysis of small RNAs in murine neutrophils cultured in vitro by Solexa/Illumina genome analyzer	SRR069834	GSM304914	TCGTATGCCGTCTTCTGCTTG	SRX029071	SRA025072	SRP003878	SRS117897	GSM304914	Analysis of small RNAs in murine neutrophils by Solexa/Illumina genome analyzer	GEO Series accession: GSE12074
SRR206939.GSM723280: NAc_saline_smallRNA	SRR206939	GSM723280	ATCTCGTATGCCGTCTTCTGCTTG	SRX062916	SRA036604	SRP006784	SRS193112	GSM723280	Cocaine-regulated expression of striatal microRNAs	GEO Series accession: GSE29261
SRR206940.GSM723281: NAc_cocaine_smallRNA	SRR206940	GSM723281	ATCTCGTATGCCGTCTTCTGCTTG	SRX062917	SRA036604	SRP006784	SRS193113	GSM723281	Cocaine-regulated expression of striatal microRNAs	GEO Series accession: GSE29261
SRR206941.GSM723282: PSD_saline_smallRNA	SRR206941	GSM723282	ATCTCGTATGCCGTCTTCTGCTTG	SRX062918	SRA036604	SRP006784	SRS193114	GSM723282	Cocaine-regulated expression of striatal microRNAs	GEO Series accession: GSE29261
SRR206942.GSM723283: PSD_cocaine_smallRNA	SRR206942	GSM723283	ATCTCGTATGCCGTCTTCTGCTTG	SRX062919	SRA036604	SRP006784	SRS193115	GSM723283	Cocaine-regulated expression of striatal microRNAs	GEO Series accession: GSE29261
SRR306526.GSM750569: Cerebellum_1	SRR306526	GSM750569	CTGTAGGCACCATCAATCGTATGCCGTCTTCTGCTTG	SRX081787	SRA039795	SRP007405	SRS213885	GSM750569	Cell-type based analysis of microRNA profiles in the mouse brain	GEO Series accession: GSE30286
SRR306527.GSM750570: Cerebellum_2	SRR306527	GSM750570	CTGTAGGCACCATCAATCGTATGCCGTCTTCTGCTTG	SRX081788	SRA039795	SRP007405	SRS213886	GSM750570	Cell-type based analysis of microRNA profiles in the mouse brain	GEO Series accession: GSE30286
SRR306528.GSM750571: Cerebellum_3	SRR306528	GSM750571	CTGTAGGCACCATCAATCGTATGCCGTCTTCTGCTTG	SRX081789	SRA039795	SRP007405	SRS213887	GSM750571	Cell-type based analysis of microRNA profiles in the mouse brain	GEO Series accession: GSE30286
SRR306529.GSM750572: Purkinje_1	SRR306529	GSM750572	CTGTAGGCACCATCAATCGTATGCCGTCTTCTGCTTG	SRX081790	SRA039795	SRP007405	SRS213888	GSM750572	Cell-type based analysis of microRNA profiles in the mouse brain	GEO Series accession: GSE30286
SRR306530.GSM750573: Purkinje_2	SRR306530	GSM750573	CTGTAGGCACCATCAATCGTATGCCGTCTTCTGCTTG	SRX081791	SRA039795	SRP007405	SRS213889	GSM750573	Cell-type based analysis of microRNA profiles in the mouse brain	GEO Series accession: GSE30286
SRR306531.GSM750574: Purkinje_3	SRR306531	GSM750574	CTGTAGGCACCATCAATCGTATGCCGTCTTCTGCTTG	SRX081792	SRA039795	SRP007405	SRS213890	GSM750574	Cell-type based analysis of microRNA profiles in the mouse brain	GEO Series accession: GSE30286
SRR306532.GSM750575: Camk2a_1	SRR306532	GSM750575	CTGTAGGCACCATCAATCGTATGCCGTCTTCTGCTTG	SRX081793	SRA039795	SRP007405	SRS213891	GSM750575	Cell-type based analysis of microRNA profiles in the mouse brain	GEO Series accession: GSE30286
SRR306533.GSM750576: Camk2a_2	SRR306533	GSM750576	CTGTAGGCACCATCAATCGTATGCCGTCTTCTGCTTG	SRX081794	SRA039795	SRP007405	SRS213892	GSM750576	Cell-type based analysis of microRNA profiles in the mouse brain	GEO Series accession: GSE30286
SRR306534.GSM750577: Camk2a_3	SRR306534	GSM750577	CTGTAGGCACCATCAATCGTATGCCGTCTTCTGCTTG	SRX081795	SRA039795	SRP007405	SRS213893	GSM750577	Cell-type based analysis of microRNA profiles in the mouse brain	GEO Series accession: GSE30286
SRR306535.GSM750578: Gad2_1	SRR306535	GSM750578	CTGTAGGCACCATCAATCGTATGCCGTCTTCTGCTTG	SRX081796	SRA039795	SRP007405	SRS213894	GSM750578	Cell-type based analysis of microRNA profiles in the mouse brain	GEO Series accession: GSE30286
SRR306536.GSM750579: Gad2_2	SRR306536	GSM750579	CTGTAGGCACCATCAATCGTATGCCGTCTTCTGCTTG	SRX081797	SRA039795	SRP007405	SRS213895	GSM750579	Cell-type based analysis of microRNA profiles in the mouse brain	GEO Series accession: GSE30286
SRR306537.GSM750580: Gad2_3	SRR306537	GSM750580	CTGTAGGCACCATCAATCGTATGCCGTCTTCTGCTTG	SRX081798	SRA039795	SRP007405	SRS213896	GSM750580	Cell-type based analysis of microRNA profiles in the mouse brain	GEO Series accession: GSE30286
SRR306538.GSM750581: Neocortex_1	SRR306538	GSM750581	CTGTAGGCACCATCAATCGTATGCCGTCTTCTGCTTG	SRX081799	SRA039795	SRP007405	SRS213897	GSM750581	Cell-type based analysis of microRNA profiles in the mouse brain	GEO Series accession: GSE30286
SRR306539.GSM750582: Neocortex_2	SRR306539	GSM750582	CTGTAGGCACCATCAATCGTATGCCGTCTTCTGCTTG	SRX081800	SRA039795	SRP007405	SRS213898	GSM750582	Cell-type based analysis of microRNA profiles in the mouse brain	GEO Series accession: GSE30286
SRR306540.GSM750583: Neocortex_3	SRR306540	GSM750583	CTGTAGGCACCATCAATCGTATGCCGTCTTCTGCTTG	SRX081801	SRA039795	SRP007405	SRS213899	GSM750583	Cell-type based analysis of microRNA profiles in the mouse brain	GEO Series accession: GSE30286
SRR306541.GSM750584: PV_1	SRR306541	GSM750584	CTGTAGGCACCATCAATCGTATGCCGTCTTCTGCTTG	SRX081802	SRA039795	SRP007405	SRS213900	GSM750584	Cell-type based analysis of microRNA profiles in the mouse brain	GEO Series accession: GSE30286
SRR306542.GSM750585: PV_2	SRR306542	GSM750585	CTGTAGGCACCATCAATCGTATGCCGTCTTCTGCTTG	SRX081803	SRA039795	SRP007405	SRS213901	GSM750585	Cell-type based analysis of microRNA profiles in the mouse brain	GEO Series accession: GSE30286
SRR306543.GSM750586: SST_1	SRR306543	GSM750586	CTGTAGGCACCATCAATCGTATGCCGTCTTCTGCTTG	SRX081804	SRA039795	SRP007405	SRS213902	GSM750586	Cell-type based analysis of microRNA profiles in the mouse brain	GEO Series accession: GSE30286
SRR306544.GSM750587: SST_2	SRR306544	GSM750587	CTGTAGGCACCATCAATCGTATGCCGTCTTCTGCTTG	SRX081805	SRA039795	SRP007405	SRS213903	GSM750587	Cell-type based analysis of microRNA profiles in the mouse brain	GEO Series accession: GSE30286
SRR345196.GSM794736: Untreated mouse hippocampus replicate 1	SRR345196	GSM794736	TCGTATGCCGTCTTCTGCTTG	SRX097257	SRA045927	SRP008223	SRS261135	GSM794736	Neuronal activity regulates hippocampal miRNA expression	GEO Series accession: GSE32055
SRR345197.GSM794737: hippocampus 0.5h following ECS replicate 1	SRR345197	GSM794737	TCGTATGCCGTCTTCTGCTTG	SRX097258	SRA045927	SRP008223	SRS261136	GSM794737	Neuronal activity regulates hippocampal miRNA expression	GEO Series accession: GSE32055
SRR345198.GSM794738: hippocampus 1h following ECS replicate 1	SRR345198	GSM794738	TCGTATGCCGTCTTCTGCTTG	SRX097259	SRA045927	SRP008223	SRS261137	GSM794738	Neuronal activity regulates hippocampal miRNA expression	GEO Series accession: GSE32055
SRR345199.GSM794739: hippocampus 3h following ECS replicate 1	SRR345199	GSM794739	TCGTATGCCGTCTTCTGCTTG	SRX097260	SRA045927	SRP008223	SRS261138	GSM794739	Neuronal activity regulates hippocampal miRNA expression	GEO Series accession: GSE32055
SRR345200.GSM794740: hippocampus 6h following ECS replicate 1	SRR345200	GSM794740	TCGTATGCCGTCTTCTGCTTG	SRX097261	SRA045927	SRP008223	SRS261139	GSM794740	Neuronal activity regulates hippocampal miRNA expression	GEO Series accession: GSE32055
SRR345201.GSM794741: hippocampus 24h following ECS replicate 1	SRR345201	GSM794741	TCGTATGCCGTCTTCTGCTTG	SRX097262	SRA045927	SRP008223	SRS261140	GSM794741	Neuronal activity regulates hippocampal miRNA expression	GEO Series accession: GSE32055
SRR345202.GSM794742: Untreated mouse hippocampus replicate 2	SRR345202	GSM794742	TCGTATGCCGTCTTCTGCTTG	SRX097263	SRA045927	SRP008223	SRS261141	GSM794742	Neuronal activity regulates hippocampal miRNA expression	GEO Series accession: GSE32055
SRR345203.GSM794743: hippocampus 0.5h following ECS replicate 2	SRR345203	GSM794743	TCGTATGCCGTCTTCTGCTTG	SRX097264	SRA045927	SRP008223	SRS261142	GSM794743	Neuronal activity regulates hippocampal miRNA expression	GEO Series accession: GSE32055
SRR345204.GSM794744: hippocampus 1h following ECS replicate 2	SRR345204	GSM794744	TCGTATGCCGTCTTCTGCTTG	SRX097265	SRA045927	SRP008223	SRS261143	GSM794744	Neuronal activity regulates hippocampal miRNA expression	GEO Series accession: GSE32055
SRR345205.GSM794745: hippocampus 3h following ECS replicate 2	SRR345205	GSM794745	TCGTATGCCGTCTTCTGCTTG	SRX097266	SRA045927	SRP008223	SRS261144	GSM794745	Neuronal activity regulates hippocampal miRNA expression	GEO Series accession: GSE32055
SRR345206.GSM794746: hippocampus 6h following ECS replicate 2	SRR345206	GSM794746	TCGTATGCCGTCTTCTGCTTG	SRX097267	SRA045927	SRP008223	SRS261145	GSM794746	Neuronal activity regulates hippocampal miRNA expression	GEO Series accession: GSE32055
SRR345207.GSM794747: hippocampus 24h following ECS replicate 2	SRR345207	GSM794747	TCGTATGCCGTCTTCTGCTTG	SRX097268	SRA045927	SRP008223	SRS261146	GSM794747	Neuronal activity regulates hippocampal miRNA expression	GEO Series accession: GSE32055
SRR346413.short_heart	SRR346413		ATCTCGTATGCCGTCTTCTGCTTG	SRX098254	SRA046016	SRP008303	SRS265069	short_heart	Global profiling of miRNA and the hairpin precursor	MDC20110921
SRR346414.short_spleen	SRR346414		ATCTCGTATGCCGTCTTCTGCTTG	SRX098255	SRA046016	SRP008303	SRS265070	short_spleen	Global profiling of miRNA and the hairpin precursor	MDC20110921
SRR346415.short_testes	SRR346415		ATCTCGTATGCCGTCTTCTGCTTG	SRX098256	SRA046016	SRP008303	SRS265071	short_testes	Global profiling of miRNA and the hairpin precursor	MDC20110921
SRR346416.short_kidney	SRR346416		ATCTCGTATGCCGTCTTCTGCTTG	SRX098257	SRA046016	SRP008303	SRS265072	short_kidney	Global profiling of miRNA and the hairpin precursor	MDC20110921
SRR346417.short_cerebellum	SRR346417		ATCTCGTATGCCGTCTTCTGCTTG	SRX098258	SRA046016	SRP008303	SRS265073	short_cerebellum	Global profiling of miRNA and the hairpin precursor	MDC20110921
SRR346418.short_liver	SRR346418		ATCTCGTATGCCGTCTTCTGCTTG	SRX098259	SRA046016	SRP008303	SRS265074	short_liver	Global profiling of miRNA and the hairpin precursor	MDC20110921
SRR346419.short_lung	SRR346419		ATCTCGTATGCCGTCTTCTGCTTG	SRX098260	SRA046016	SRP008303	SRS265075	short_lung	Global profiling of miRNA and the hairpin precursor	MDC20110921
SRR346420.short_uterus	SRR346420		ATCTCGTATGCCGTCTTCTGCTTG	SRX098261	SRA046016	SRP008303	SRS265077	short_uterus	Global profiling of miRNA and the hairpin precursor	MDC20110921
SRR346421.mixtureDSN	SRR346421		ATCTCGTATGCCGTCTTCTGCTTG	SRX098263	SRA046016	SRP008303	SRS265078	mixtureDSN	Global profiling of miRNA and the hairpin precursor	MDC20110921
SRR346422.short_muscle	SRR346422		ATCTCGTATGCCGTCTTCTGCTTG	SRX098264	SRA046016	SRP008303	SRS265079	short_muscle	Global profiling of miRNA and the hairpin precursor	MDC20110921
SRR346423.short_cortex	SRR346423		ATCTCGTATGCCGTCTTCTGCTTG	SRX098265	SRA046016	SRP008303	SRS265080	short_cortex	Global profiling of miRNA and the hairpin precursor	MDC20110921
SRR346424.N2a_pbs	SRR346424		ATCTCGTATGCCGTCTTCTGCTTG	SRX098266	SRA046016	SRP008303	SRS265081	N2a_pbs	Global profiling of miRNA and the hairpin precursor	MDC20110921
SRR346425.N2a_D2	SRR346425		ATCTCGTATGCCGTCTTCTGCTTG	SRX098267	SRA046016	SRP008303	SRS265082	N2a_D2	Global profiling of miRNA and the hairpin precursor	MDC20110921
SRR391845.GSM852140: wild type replicate 1; Mus musculus; RNA-Seq	SRR391845	GSM852140	TCGTATGCCGTCTTCTGCTTG	SRX112710	SRA048763	SRP009919	SRS283223	GSM852140	Adenosine deaminases that act on RNA induce reproducible changes in abundance and sequence of embryonic miRNAs	GEO Series accession: GSE34626
SRR391846.GSM852141: ADAR2-/- replicate 1; Mus musculus; RNA-Seq	SRR391846	GSM852141	TCGTATGCCGTCTTCTGCTTG	SRX112711	SRA048763	SRP009919	SRS283224	GSM852141	Adenosine deaminases that act on RNA induce reproducible changes in abundance and sequence of embryonic miRNAs	GEO Series accession: GSE34626
SRR391847.GSM852142: ADAR2-/-/ADAR1-/- replicate 1; Mus musculus; RNA-Seq	SRR391847	GSM852142	TCGTATGCCGTCTTCTGCTTG	SRX112712	SRA048763	SRP009919	SRS283225	GSM852142	Adenosine deaminases that act on RNA induce reproducible changes in abundance and sequence of embryonic miRNAs	GEO Series accession: GSE34626
SRR391848.GSM852143: wild type replicate 2; Mus musculus; RNA-Seq	SRR391848	GSM852143	TCGTATGCCGTCTTCTGCTTG	SRX112713	SRA048763	SRP009919	SRS283226	GSM852143	Adenosine deaminases that act on RNA induce reproducible changes in abundance and sequence of embryonic miRNAs	GEO Series accession: GSE34626
SRR391849.GSM852144: ADAR2-/- replicate 2; Mus musculus; RNA-Seq	SRR391849	GSM852144	TCGTATGCCGTCTTCTGCTTG	SRX112714	SRA048763	SRP009919	SRS283227	GSM852144	Adenosine deaminases that act on RNA induce reproducible changes in abundance and sequence of embryonic miRNAs	GEO Series accession: GSE34626
SRR391850.GSM852145: ADAR2-/-/ADAR1-/- replicate 2; Mus musculus; RNA-Seq	SRR391850	GSM852145	TCGTATGCCGTCTTCTGCTTG	SRX112715	SRA048763	SRP009919	SRS283228	GSM852145	Adenosine deaminases that act on RNA induce reproducible changes in abundance and sequence of embryonic miRNAs	GEO Series accession: GSE34626
SRR391851.GSM852146: wild type replicate 3; Mus musculus; RNA-Seq	SRR391851	GSM852146	TCGTATGCCGTCTTCTGCTTG	SRX112716	SRA048763	SRP009919	SRS283229	GSM852146	Adenosine deaminases that act on RNA induce reproducible changes in abundance and sequence of embryonic miRNAs	GEO Series accession: GSE34626
SRR391852.GSM852147: ADAR2-/- replicate 3; Mus musculus; RNA-Seq	SRR391852	GSM852147	TCGTATGCCGTCTTCTGCTTG	SRX112717	SRA048763	SRP009919	SRS283230	GSM852147	Adenosine deaminases that act on RNA induce reproducible changes in abundance and sequence of embryonic miRNAs	GEO Series accession: GSE34626
SRR391853.GSM852148: ADAR2-/-/ADAR1-/- replicate 3; Mus musculus; RNA-Seq	SRR391853	GSM852148	TCGTATGCCGTCTTCTGCTTG	SRX112718	SRA048763	SRP009919	SRS283231	GSM852148	Adenosine deaminases that act on RNA induce reproducible changes in abundance and sequence of embryonic miRNAs	GEO Series accession: GSE34626
SRR525237.IgG Control 1	SRR525237		TCGTATGCCGTCTTCTGCTTG	SRX170313	SRA056111	SRP014535	SRS351131	IgG Control 1	Mus musculus domesticus miRNA sequencing	PRJNA171125
SRR525238.IgG control 3	SRR525238		TCGTATGCCGTCTTCTGCTTG	SRX170314	SRA056111	SRP014535	SRS351132	IgG control 3	Mus musculus domesticus miRNA sequencing	PRJNA171125
SRR525239.Argonaute 1.a	SRR525239		TCGTATGCCGTCTTCTGCTTG	SRX170315	SRA056111	SRP014535	SRS351133	Argonaute 1.a	Mus musculus domesticus miRNA sequencing	PRJNA171125
SRR525240.Argonaute 1.b	SRR525240		TCGTATGCCGTCTTCTGCTTG	SRX170316	SRA056111	SRP014535	SRS351134	Argonaute 1.b	Mus musculus domesticus miRNA sequencing	PRJNA171125
SRR525241.Argonaute 1.c	SRR525241		TCGTATGCCGTCTTCTGCTTG	SRX170317	SRA056111	SRP014535	SRS351135	Argonaute 1.c	Mus musculus domesticus miRNA sequencing	PRJNA171125
SRR525242.Argonaute 2.a	SRR525242		TCGTATGCCGTCTTCTGCTTG	SRX170318	SRA056111	SRP014535	SRS351136	Argonaute 2.a	Mus musculus domesticus miRNA sequencing	PRJNA171125
SRR525243.Argonaute 2.b	SRR525243		TCGTATGCCGTCTTCTGCTTG	SRX170319	SRA056111	SRP014535	SRS351137	Argonaute 2.b	Mus musculus domesticus miRNA sequencing	PRJNA171125
SRR525244.Argonaute 2.c	SRR525244		TCGTATGCCGTCTTCTGCTTG	SRX170320	SRA056111	SRP014535	SRS351138	Argonaute 2.c	Mus musculus domesticus miRNA sequencing	PRJNA171125
SRR546155.Ago2-IP	SRR546155		ATCTCGTATGCCGTCTTCTGCTTG	SRX180174	SRA046016	SRP008303	SRS359036	Ago2-IP	Global profiling of miRNA and the hairpin precursor	MDC20110921

## Sheet: 4-mmustatistics
Name	collapsed unique sequences	total number of reads in library	reads mapped to UCSC mmu10 genome	reads mapped to mmu mirbasev20 miRNA stemloop hairpin
SRR640602.GSM1057530: ES_NI; Mus musculus; RNA-Seq	939316	30990668	22695740	16487067
SRR640603.GSM1057531: ES_EMCV 3hrs; Mus musculus; RNA-Seq	1090877	36048416	27197916	20242824
SRR640604.GSM1057532: ES_EMCV 6hrs; Mus musculus; RNA-Seq	919311	30919063	22838540	16214378
SRR640605.GSM1057533: ES_D0 INF; Mus musculus; RNA-Seq	1196501	31184688	23915664	18565508
SRR640606.GSM1057534: ES_D10 NI; Mus musculus; RNA-Seq	839211	35763265	27078866	21317347
SRR640607.GSM1057535: ES_D10 INF; Mus musculus; RNA-Seq	842598	27989233	20878367	16349502
SRR640612.GSM1057540: IP_mAGO2_INF; Mus musculus; RNA-Seq	945903	36971638	25689374	17783462
SRR640614.GSM1057542: ES_NoV; Mus musculus; RNA-Seq	1839004	43762647	29906760	21330238
SRR640615.GSM1057543: ES_NoVÃ«Ã“B2; Mus musculus; RNA-Seq	1578063	38595568	26196716	20376789
SRR037904.GSM510440: brain_rep1	50261	386402	259079	239198
SRR037905.GSM510441: brain_rep2	297280	2052171	1259544	1161962
SRR037906.GSM510442: brain_rep3	399474	2592581	1549207	1428859
SRR037907.GSM510443: brain_rep4	142664	672031	363510	336138
SRR037919.GSM510457: e12p5_rep1	44006	286434	200602	175908
SRR037920.GSM510458: e12p5_rep2	299556	1952848	1254761	1099601
SRR037921.GSM510459: e12p5_rep3	414291	2502328	1551195	1356710
SRR037922.GSM510460: e12p5_rep4	137126	669049	406203	354936
SRR037923.GSM510461: e9p5_rep1	93963	601149	388991	331105
SRR037924.GSM510462: e9p5_rep2	1120185	3680588	1626398	1380482
SRR037925.GSM510463: e9p5_rep3	1011117	3747900	1768793	1494767
SRR037926.GSM510464: e9p5_rep4	151419	577295	296974	255172
SRR037927.GSM510465: e7p5_rep1	112104	713393	454051	364215
SRR037928.GSM510466: e7p5_rep2	607415	2676173	1413863	1139601
SRR037929.GSM510467: e7p5_rep3	817036	3388742	1716361	1369175
SRR037930.GSM510468: e7p5_rep4	142389	562816	287246	230621
SRR038741.GSM527276: DGCR8_wt_hippocampus	354821	4425927	151644	51433
SRR038744.GSM527279: DGCR8_wt_cortex	762447	6919624	240239	69327
SRR039610.GSM527274: DICER_wt_hippocampus	729538	5211872	303082	49865
SRR040488.GSM533911: E18.5 wild type LIVER small RNA	1175607	6862134	4631462	2766206
SRR042477.GSM539869: mouse brain tissue [09-002]	148412	6075312	3941749	3892767
SRR042482.GSM539874: mouse skin tissue [09-002]	200560	6188518	4336760	4223145
SRR069834.GSM304914: Analysis of small RNAs in murine neutrophils cultured in vitro by Solexa/Illumina genome analyzer	77946	1038512	501480	361229
SRR206939.GSM723280: NAc_saline_smallRNA	262265	4623202	3430955	3143138
SRR206940.GSM723281: NAc_cocaine_smallRNA	360809	7374089	5869714	5278582
SRR206941.GSM723282: PSD_saline_smallRNA	722300	9879874	7093429	4080520
SRR206942.GSM723283: PSD_cocaine_smallRNA	655063	10673536	8272222	4903912
SRR306526.GSM750569: Cerebellum_1	65601	1607560	1263775	1257345
SRR306527.GSM750570: Cerebellum_2	138762	4312933	3381355	3363419
SRR306528.GSM750571: Cerebellum_3	74182	2298540	1835189	1827833
SRR306529.GSM750572: Purkinje_1	152069	2958050	2167233	2132242
SRR306530.GSM750573: Purkinje_2	196120	3670865	2618157	2567100
SRR306531.GSM750574: Purkinje_3	205310	4733930	3575593	3513049
SRR306532.GSM750575: Camk2a_1	308135	17597296	10595586	10522076
SRR306533.GSM750576: Camk2a_2	288758	19942760	13068505	12992106
SRR306534.GSM750577: Camk2a_3	301190	16866901	10788920	10715597
SRR306535.GSM750578: Gad2_1	259454	19778371	14439232	14377461
SRR306536.GSM750579: Gad2_2	276124	12639869	7800454	7743893
SRR306537.GSM750580: Gad2_3	262856	11585000	7287873	7249466
SRR306538.GSM750581: Neocortex_1	95908	3739500	2286594	2276550
SRR306539.GSM750582: Neocortex_2	186371	7201416	4331887	4312199
SRR306540.GSM750583: Neocortex_3	234062	15548715	11174272	11141433
SRR306541.GSM750584: PV_1	979757	18074011	11218886	11023011
SRR306542.GSM750585: PV_2	623015	16528599	11673424	11568929
SRR306543.GSM750586: SST_1	267828	2616215	1356475	1331771
SRR306544.GSM750587: SST_2	495901	8370035	2618212	2500721
SRR345196.GSM794736: Untreated mouse hippocampus replicate 1	917688	3717930	1948827	1143201
SRR345197.GSM794737: hippocampus 0.5h following ECS replicate 1	2425755	6221300	2198810	1783166
SRR345198.GSM794738: hippocampus 1h following ECS replicate 1	2563959	5845572	1865085	1407888
SRR345199.GSM794739: hippocampus 3h following ECS replicate 1	1663581	4861055	1979082	1549809
SRR345200.GSM794740: hippocampus 6h following ECS replicate 1	2822196	4431578	799771	469949
SRR345201.GSM794741: hippocampus 24h following ECS replicate 1	2246763	6536368	2561135	2229686
SRR345202.GSM794742: Untreated mouse hippocampus replicate 2	1142791	7167976	4487916	4242815
SRR345203.GSM794743: hippocampus 0.5h following ECS replicate 2	1266216	7230675	4035816	3854667
SRR345204.GSM794744: hippocampus 1h following ECS replicate 2	936920	6511871	4025088	3864849
SRR345205.GSM794745: hippocampus 3h following ECS replicate 2	1091512	7131191	4208893	4056853
SRR345206.GSM794746: hippocampus 6h following ECS replicate 2	151282	1788398	1384527	1317881
SRR345207.GSM794747: hippocampus 24h following ECS replicate 2	963158	6815638	4235207	4051879
SRR346413.short_heart	175669	11216625	8599971	7543806
SRR346414.short_spleen	359321	9322264	7509465	6636892
SRR346415.short_testes	1316354	15402161	10849103	5041946
SRR346416.short_kidney	915672	16201365	12580968	5934575
SRR346417.short_cerebellum	485562	19749020	15963674	13859563
SRR346418.short_liver	1029239	17050203	13816020	9418737
SRR346419.short_lung	1192560	17962800	12794904	6754159
SRR346420.short_uterus	1084992	17440838	11810422	6845858
SRR346421.mixtureDSN	46310	336484	259191	21534
SRR346422.short_muscle	306387	20316678	15080076	13921863
SRR346423.short_cortex	400683	19833617	16311677	13661802
SRR346424.N2a_pbs	903624	23341404	19052527	16952871
SRR346425.N2a_D2	1154315	18053037	13838117	11191529
SRR391845.GSM852140: wild type replicate 1; Mus musculus; RNA-Seq	1808469	23089293	17366960	12504901
SRR391846.GSM852141: ADAR2-/- replicate 1; Mus musculus; RNA-Seq	2605885	21070463	14440971	8790649
SRR391847.GSM852142: ADAR2-/-/ADAR1-/- replicate 1; Mus musculus; RNA-Seq	2251444	21918309	15106291	8880642
SRR391848.GSM852143: wild type replicate 2; Mus musculus; RNA-Seq	2217523	18308363	13258583	5971168
SRR391849.GSM852144: ADAR2-/- replicate 2; Mus musculus; RNA-Seq	2490994	15430331	11650292	3079646
SRR391850.GSM852145: ADAR2-/-/ADAR1-/- replicate 2; Mus musculus; RNA-Seq	1915871	13818703	8870138	2354876
SRR391851.GSM852146: wild type replicate 3; Mus musculus; RNA-Seq	2958194	28210352	20653813	9613536
SRR391852.GSM852147: ADAR2-/- replicate 3; Mus musculus; RNA-Seq	3803135	29763126	22312170	10882075
SRR391853.GSM852148: ADAR2-/-/ADAR1-/- replicate 3; Mus musculus; RNA-Seq	3409848	27600571	21383877	10821159
SRR525237.IgG Control 1	144356	4081798	531015	51966
SRR525238.IgG control 3	209011	6233237	1051419	221461
SRR525239.Argonaute 1.a	129813	6613901	763224	650825
SRR525240.Argonaute 1.b	170590	5088662	1081620	837302
SRR525241.Argonaute 1.c	175004	6564094	760427	467374
SRR525242.Argonaute 2.a	152152	8110268	4723321	4700512
SRR525243.Argonaute 2.b	215842	9859314	5165992	5084017
SRR525244.Argonaute 2.c	203851	14201384	8078433	7981930
SRR546155.Ago2-IP	1801005	133334876	98155474	97165644

## Sheet: 5-hsalibraries
Name	Run	GSMnumber	Adapter3prime	Experiment	Submission	SRAStudy	Sample	SampleName	Study Title	BioProject
SRR039611.GSM531974: Human Normal Liver Tissue Sample 1	SRR039611	GSM531974	TCGTATGCCGTCTTCTGCTTG	SRX018957	SRA012425	SRP002272	SRS059014	GSM531974	Small RNA Solexa sequencing of human liver samples	GEO Series accession: GSE21279
SRR039612.GSM531975: Human Normal Liver Tissue Sample 2	SRR039612	GSM531975	TCGTATGCCGTCTTCTGCTTG	SRX018958	SRA012425	SRP002272	SRS059015	GSM531975	Small RNA Solexa sequencing of human liver samples	GEO Series accession: GSE21279
SRR039613.GSM531976: Human Normal Liver Tissue Sample 3	SRR039613	GSM531976	TCGTATGCCGTCTTCTGCTTG	SRX018959	SRA012425	SRP002272	SRS059016	GSM531976	Small RNA Solexa sequencing of human liver samples	GEO Series accession: GSE21279
SRR207111.GSM721073: HeLa18-30	SRR207111	GSM721073	ATCTCGTATGCCGTCTTCTGCTTG	SRX063008	SRA036617	SRP006788	SRS193195	GSM721073	Small RNA profiles from human genic regions suggest biogenic mechanisms and identify new Argonaute-associated species	GEO Series accession: GSE29116
SRR207112.GSM721074: HeLa18-30_RRP40	SRR207112	GSM721074	ATCTCGTATGCCGTCTTCTGCTTG	SRX063009	SRA036617	SRP006788	SRS193196	GSM721074	Small RNA profiles from human genic regions suggest biogenic mechanisms and identify new Argonaute-associated species	GEO Series accession: GSE29116
SRR207113.GSM721075: HeLa18-30_AGO1/2	SRR207113	GSM721075	ATCTCGTATGCCGTCTTCTGCTTG	SRX063010	SRA036617	SRP006788	SRS193197	GSM721075	Small RNA profiles from human genic regions suggest biogenic mechanisms and identify new Argonaute-associated species	GEO Series accession: GSE29116
SRR207114.GSM721076: HeLa18-30_AGO1/2_RRP40	SRR207114	GSM721076	ATCTCGTATGCCGTCTTCTGCTTG	SRX063011	SRA036617	SRP006788	SRS193198	GSM721076	Small RNA profiles from human genic regions suggest biogenic mechanisms and identify new Argonaute-associated species	GEO Series accession: GSE29116
SRR207115.GSM721077: HeLa18-30_XRN1/2	SRR207115	GSM721077	ATCTCGTATGCCGTCTTCTGCTTG	SRX063012	SRA036617	SRP006788	SRS193199	GSM721077	Small RNA profiles from human genic regions suggest biogenic mechanisms and identify new Argonaute-associated species	GEO Series accession: GSE29116
SRR207116.GSM721078: HeLa18-30_N	SRR207116	GSM721078	ATCTCGTATGCCGTCTTCTGCTTG	SRX063013	SRA036617	SRP006788	SRS193200	GSM721078	Small RNA profiles from human genic regions suggest biogenic mechanisms and identify new Argonaute-associated species	GEO Series accession: GSE29116
SRR387909.GSM843861: Total RNA extracted from HHV-6 infected Sup-T-1 cells	SRR387909	GSM843861	TCGTATGCCGTCTTCTGCTTG	SRX110587	SRA048502	SRP009640	SRS281805	GSM843861	Small RNA deep-sequencing identifies microRNAs and other small non-coding RNAs from human herpesvirus 6 (HHV-6B)	GEO Series accession: GSE34196
SRR387910.GSM843862: Ago 2 immunoprecipitated RNA extracted from HHV-6 infected Sup-T-1 cells	SRR387910	GSM843862	TCGTATGCCGTCTTCTGCTTG	SRX110588	SRA048502	SRP009640	SRS281806	GSM843862	Small RNA deep-sequencing identifies microRNAs and other small non-coding RNAs from human herpesvirus 6 (HHV-6B)	GEO Series accession: GSE34196
SRR390723.GSM850202: Endogenous small RNAs from human senescent fibroblast WI-38; Homo sapiens; RNA-Seq	SRR390723	GSM850202	ATCTCGTATGCCGTCTTCTGCTTG	SRX112006	SRA048699	SRP009864	SRS282727	GSM850202	High-throughput sequencing of AGO-immunoprecipitating miRs in human senescent fibroblast WI-38	GEO Series accession: GSE34494
SRR390724.GSM850203: immunoprecipitating small RNA with an antibody againt AGO proteins from human senescent fibroblast WI-38; Homo sapiens; OTHER	SRR390724	GSM850203	ATCTCGTATGCCGTCTTCTGCTTG	SRX112007	SRA048699	SRP009864	SRS282728	GSM850203	High-throughput sequencing of AGO-immunoprecipitating miRs in human senescent fibroblast WI-38	GEO Series accession: GSE34494
SRR390725.GSM850204: immunoprecipitating small RNA with an antibody againt H3K9me2 proteins from human senescent fibroblast WI-38; Homo sapiens; OTHER	SRR390725	GSM850204	ATCTCGTATGCCGTCTTCTGCTTG	SRX112008	SRA048699	SRP009864	SRS282729	GSM850204	High-throughput sequencing of AGO-immunoprecipitating miRs in human senescent fibroblast WI-38	GEO Series accession: GSE34494
SRR797059.GSM1105748: Ago1 IP; Homo sapiens; RNA-Seq	SRR797059	GSM1105748	TACTATCGTATGCCGTCTTCTGCTTG	SRX255060	SRA071574	SRP019990	SRS404030	GSM1105748	GSE45506: miRNAs associated with the different human Argonaute proteins	GEO Series accession: GSE45506
SRR797060.GSM1105749: Ago2 IP; Homo sapiens; RNA-Seq	SRR797060	GSM1105749	TGTAATCGTATGCCGTCTTCTGCTTG	SRX255061	SRA071574	SRP019990	SRS404031	GSM1105749	GSE45506: miRNAs associated with the different human Argonaute proteins	GEO Series accession: GSE45506
SRR797061.GSM1105750: Ago3 IP; Homo sapiens; RNA-Seq	SRR797061	GSM1105750	TTACATCGTATGCCGTCTTCTGCTTG	SRX255062	SRA071574	SRP019990	SRS404032	GSM1105750	GSE45506: miRNAs associated with the different human Argonaute proteins	GEO Series accession: GSE45506
SRR797062.GSM1105751: Ago4 IP; Homo sapiens; RNA-Seq	SRR797062	GSM1105751	TATGATCGTATGCCGTCTTCTGCTTG	SRX255063	SRA071574	SRP019990	SRS404033	GSM1105751	GSE45506: miRNAs associated with the different human Argonaute proteins	GEO Series accession: GSE45506
SRR797063.GSM1105752: Control IP; Homo sapiens; RNA-Seq	SRR797063	GSM1105752	TGAGATCGTATGCCGTCTTCTGCTTG	SRX255064	SRA071574	SRP019990	SRS404034	GSM1105752	GSE45506: miRNAs associated with the different human Argonaute proteins	GEO Series accession: GSE45506
SRR797064.GSM1105753: Input; Homo sapiens; RNA-Seq	SRR797064	GSM1105753	TCATATCGTATGCCGTCTTCTGCTTG	SRX255065	SRA071574	SRP019990	SRS404035	GSM1105753	GSE45506: miRNAs associated with the different human Argonaute proteins	GEO Series accession: GSE45506

## Sheet: 6-hsastatistics
Name	collapsed unique sequences	total number of reads in library	reads mapped to UCSC hg19 genome	reads mapped to hsa mirbasev20 miRNA stemloop hairpin
SRR039611.GSM531974: Human Normal Liver Tissue Sample 1	352222	8935270	5789205	5196876
SRR039612.GSM531975: Human Normal Liver Tissue Sample 2	427382	13742035	8934148	8361425
SRR039613.GSM531976: Human Normal Liver Tissue Sample 3	394289	13616779	9058140	8202683
SRR207111.GSM721073: HeLa18-30	210162	4919131	4467898	4142896
SRR207112.GSM721074: HeLa18-30_RRP40	242740	4132110	3629304	3214127
SRR207113.GSM721075: HeLa18-30_AGO1/2	308648	15511035	12270890	12073631
SRR207114.GSM721076: HeLa18-30_AGO1/2_RRP40	297626	16268918	12956585	12402430
SRR207115.GSM721077: HeLa18-30_XRN1/2	1480884	20780143	16442823	12156930
SRR207116.GSM721078: HeLa18-30_N	1327808	18008014	14170613	10986874
SRR387909.GSM843861: Total RNA extracted from HHV-6 infected Sup-T-1 cells	436119	23138114	12353438	2493347
SRR387910.GSM843862: Ago 2 immunoprecipitated RNA extracted from HHV-6 infected Sup-T-1 cells	251558	29161711	25048207	24767658
SRR390723.GSM850202: Endogenous small RNAs from human senescent fibroblast WI-38; Homo sapiens; RNA-Seq	174894	3302986	2697829	2540584
SRR390724.GSM850203: immunoprecipitating small RNA with an antibody againt AGO proteins from human senescent fibroblast WI-38; Homo sapiens; OTHER	60383	2117115	432542	376792
SRR390725.GSM850204: immunoprecipitating small RNA with an antibody againt H3K9me2 proteins from human senescent fibroblast WI-38; Homo sapiens; OTHER	54095	2191683	56133	48032
SRR797059.GSM1105748: Ago1 IP; Homo sapiens; RNA-Seq	131654	7716530	10817	9089
SRR797060.GSM1105749: Ago2 IP; Homo sapiens; RNA-Seq	110263	4507209	8532	6951
SRR797061.GSM1105750: Ago3 IP; Homo sapiens; RNA-Seq	125027	9207810	8785	7108
SRR797062.GSM1105751: Ago4 IP; Homo sapiens; RNA-Seq	11451	103641	431	143
SRR797063.GSM1105752: Control IP; Homo sapiens; RNA-Seq	13763	68966	419	119
SRR797064.GSM1105753: Input; Homo sapiens; RNA-Seq	411914	5647556	26875	13230

## Sheet: 7-referencesequence
Reference Sequences	Source	Reference
RepeatMasker Database release 20130422	RepBase Update	Jurka et al. (2005) Repbase Update, a database of eukaryotic repetitive elements. Cytogentic and Genome Research 110:462-467. Smit et al., P. RepeatMasker Open-3.0. 1996-2010 <http://www.repeatmasker.org>.
FB201304 dmel-r5.52	FlyBase	St. Pierre et al. (2014). FlyBase 102 - advanced approaches to interrogating FlyBase. NAR 42(D1):D780-D788.
miRBase Release 20	miRBase	Kozomara and Griffiths-Jones S. (2014) miRBase: annotating high confidence microRNAs using deep sequencing data. NAR 42:D68-D73
D. melanogaster (dme) rDNA M21017.1 (repeated half 18S sequence removed from fasta file according to NCBI genbank annotation to obtain 11726nt long sequence)	NCBI	https://www.ncbi.nlm.nih.gov
H. sapiens (hsa) rDNA NR046235 (13357nt)	NCBI	https://www.ncbi.nlm.nih.gov
M. musculus (mmu) rDNA BK000964 (45306nt)	NCBI	https://www.ncbi.nlm.nih.gov
D. melanogaster Genome Assembly Apr. 2006 (dm3)	UCSC Genome Browser	Hoskins et al. (2007) Sequence finishing and mapping of Drosophila melanogaster heterochromatin. Science. 316(5831):1625-1628. Celniker et al. (2002) Finishing a whole genome shotgun: Release 3 of the Drosophila melanogaster euchromatic genome sequence. Genome Biology 3(12):research0079.1-0079.14. Hoskins et al. (2002) Heterochromatic sequences in a Drosophila whole genome shotgun assembly. Genom…
Mouse Genome Assembly Dec. 2011 (mm10)	UCSC Genome Browser	Mouse Genome Sequencing Consortium. (2002) Initial sequencing and comparative analysis of the mouse genome. Nature. 420(6915):520-562
Human Genome Assembly Feb. 2009 (hg19, GRCh37)	UCSC Genome Browser	The Genome Sequencing Consortium. (2002) Initial sequencing and analysis of the human genome. Nature 409(6822):860-921.
hairpin siRNA		Okamura et al. (2008) The Drosophila hairpin RNA pathway generates endogenous short interfering RNAs. Nature 453(7196):803-806. Czech et al. (2008) An endogenous small interfering RNA pathway in Drosophila. Nature 453(7196):798-802. Kawamura et al. (2008) Drosophila endogenous small RNAs bind to Argonaute 2 in somatic cells. Nature 453(7196):793-797. Ghildiyal et al. (2008) Endogenous siRNAs deri…
