# Supplementary material
Source: HighWire-hosted journal article supplement (doi:10.1101/rna.049098.114)
Supplement: TableS2_ITS1_mapping.xlsx [file TableS2_ITS1_mapping.xlsx]

## Sheet: 1-count
key	start0based	stop1based	dme-mir-ITS1 hairpin	sequencelength	sequence	tissues and organs	V063V0632...combined V063 and V0632.CS,ovary,AGO1IP	V064V0642...combined V064 and V0642.ago2[414], ovary, AGO1IP	V065V0652...combined V065 and V0652.dcr-2[L811fsX], ovary, AGO1IP	V066V0662...combined V066 and V0662.r2d2[1], ovary, AGO1IP	V097.SRR069232.GSM609246..CS ovary	V0892.SRR073602.GSM628272.resequenced of V089.ago2[414] ovary total RNA Â	V098.SRR069233.GSM609245..dcr-2[L811fsX] ovary	V0882.SRR073601.GSM628271.resequenced of V088.r2d2[1] ovary total RNA Â	SRR068998.S2.head female	SRR013604.S22.head female	SRR016854.S24.male body	SRR018039.S23.female body	SRR069835.S1.head male	SRR069836.S3.male body	SRR069837.S4.female body	SRR069236.V090.male body	SRR069832.S5.Imaginal disc	SRR016853.S21.imaginal disc brain	SRR031692..head	SRR031696..AGO1IP head	SRR032152..AGO1IP head	SRR060644..ovary A2	SRR060647..AGO2 IP ovary A2	Cell lines	V094....FLAG-IP from S2-R+, FLAG-HA-AGO2	V095....AGO1-IP from S2-R+, FLAG-HA-AGO2	SRR013547.V020, SRR013548.V025 combined.cell line S2R+	SRR1015573..GFP knockdown, AGO1IP, S2R+	SRR1015574..dcr1 knockdown, AGO1IP, S2R+	SRR069830.S15.cell line S2-GMR	SRR013618.S30.cell line S2-GMR	SRR069831.S16.cell line KC	SRR016855.S33.cell line KC	SRR029028..cell line S2-NP mock	SRR029029..dcr1 knocdown S2-NP	SRR029030..dcr2 knockdown S2-NP	SRR029031..loqs knockdown S2-NP	SRR029032..r2d2 knockdown S2-NP	SRR029033..lacZ knockdown S2-NP	SRR032092..cell line S2-NP mock oxidized	SRR032093..ago1 knockdown S2-NP	SRR032094..ago2 knockdown S2-NP	SRR032095..dcr2 knockdown AGO1IP S2-NP
key	start0based	stop1based	ATACATTTATTGAAGGAATTGATATATGCCAGTAAAATGGTGTATTTTTAATTTCTTTCAATAAAAACA	sequencelength	sequence		V063V0632.NormReads	V064V0642.NormReads	V065V0652.NormReads	V066V0662.NormReads	V097.NormReads	V0892.NormReads	V098.NormReads	V0882.NormReads	SRR068998.NormReads	SRR013604.NormReads	SRR016854.NormReads	SRR018039.NormReads	SRR069835.NormReads	SRR069836.NormReads	SRR069837.NormReads	V090.NormReads	SRR069832.NormReads	SRR016853.NormReads	SRR031692.NormReads	SRR031696.NormReads	SRR032152.NormReads	SRR060644.NormReads	SRR060647.NormReads		V094.NormReads	V095.NormReads	V020V025.NormReads	SRR1015573.NormReads	SRR1015574.NormReads	SRR069830.NormReads	SRR013618.NormReads	SRR069831.NormReads	SRR016855.NormReads	SRR029028.NormReads	SRR029029.NormReads	SRR029030.NormReads	SRR029031.NormReads	SRR029032.NormReads	SRR029033.NormReads	SRR032092.NormReads	SRR032093.NormReads	SRR032094.NormReads	SRR032095.NormReads
dme-mir-ITS1_7_29_+	7	29	.......TATTGAAGGAATTGATATATGC........................................	22	TATTGAAGGAATTGATATATGC		22728	8687	30589	15300	28133	18444	13579	16266	89	110	509	178	12	42	105	2310	102	83	115	178	464	1036	382		306	1762	632	877	176	88	156	90	257	144	2	46	30	39	68	54	51	44	141
dme-mir-ITS1_9_31_+	9	31	.........TTGAAGGAATTGATATATGCCA......................................	22	TTGAAGGAATTGATATATGCCA		30050	12702	32639	13798	9703	6642	5414	7706	28	37	140	65	1	11	20	384	30	33	38	65	144	262	30		9	109	13	64	15	7	9	13	63	31	0	17	1	0	0	30	2	2	3
dme-mir-ITS1_7_28_+	7	28	.......TATTGAAGGAATTGATATATG.........................................	21	TATTGAAGGAATTGATATATG		10949	5715	11043	4348	18131	9344	9624	3728	53	110	263	72	2	26	19	2817	42	56	87	80	161	396	37		104	1111	217	669	124	51	66	39	105	120	0	16	49	14	17	0	24	14	104
dme-mir-ITS1_7_30_+	7	30	.......TATTGAAGGAATTGATATATGCC.......................................	23	TATTGAAGGAATTGATATATGCC		6236	2759	9640	6386	11245	6264	5516	7026	46	42	185	105	3	17	42	563	66	71	80	81	168	146	43		44	447	114	579	310	45	81	35	138	50	14	10	2	2	13	0	18	2	2
dme-mir-ITS1_7_31_+	7	31	.......TATTGAAGGAATTGATATATGCCA......................................	24	TATTGAAGGAATTGATATATGCCA		11238	4035	10629	3415	8220	5169	5115	3318	3	7	13	38	0	0	12	23	8	2	2	20	43	174	9		2	26	2	8	24	0	9	0	64	6	0	5	0	0	0	0	0	13	0
dme-mir-ITS1_9_30_+	9	30	.........TTGAAGGAATTGATATATGCC.......................................	21	TTGAAGGAATTGATATATGCC		6856	3076	8925	4739	4593	3561	2266	4363	17	51	66	56	6	7	13	310	10	20	17	32	93	124	89		30	85	33	306	128	5	14	6	42	17	0	11	1	13	0	0	7	0	9
dme-mir-ITS1_8_30_+	8	30	........ATTGAAGGAATTGATATATGCC.......................................	22	ATTGAAGGAATTGATATATGCC		1368	478	1889	796	1316	689	694	1326	1	3	6	2	0	1	3	27	0	4	6	5	11	8	0		5	31	6	83	27	1	5	1	12	0	0	0	0	0	0	0	0	0	1
dme-mir-ITS1_6_28_+	6	28	......TTATTGAAGGAATTGATATATG.........................................	22	TTATTGAAGGAATTGATATATG		843	379	1134	427	1233	409	634	346	7	8	23	2	3	3	3	269	4	7	14	14	29	33	1		14	58	11	14	2	5	1	5	5	10	0	0	2	0	0	0	1	0	3
dme-mir-ITS1_9_29_+	9	29	.........TTGAAGGAATTGATATATGC........................................	20	TTGAAGGAATTGATATATGC		1329	467	1373	396	541	367	328	443	2	6	15	7	2	2	1	78	2	3	5	12	30	41	53		11	25	12	53	31	3	1	2	7	9	4	2	7	0	0	0	5	0	15
dme-mir-ITS1_8_29_+	8	29	........ATTGAAGGAATTGATATATGC........................................	21	ATTGAAGGAATTGATATATGC		1249	415	1463	476	874	401	435	534	0	3	10	7	0	2	5	27	2	2	4	4	13	8	31		8	22	9	81	14	1	0	1	5	6	0	11	0	0	0	0	2	4	8
dme-mir-ITS1_10_31_+	10	31	..........TGAAGGAATTGATATATGCCA......................................	21	TGAAGGAATTGATATATGCCA		1244	698	2025	769	433	305	279	283	25	86	65	28	4	18	10	42	13	18	8	5	25	12	30		4	5	2	18	3	5	2	10	25	2	0	0	0	0	0	0	1	0	0
dme-mir-ITS1_6_29_+	6	29	......TTATTGAAGGAATTGATATATGC........................................	23	TTATTGAAGGAATTGATATATGC		474	177	1023	506	656	358	333	599	4	3	16	5	0	1	2	68	4	3	7	37	81	21	43		54	55	26	21	3	3	7	4	1	5	0	0	2	9	1	0	0	0	3
dme-mir-ITS1_7_27_+	7	27	.......TATTGAAGGAATTGATATAT..........................................	20	TATTGAAGGAATTGATATAT		834	248	714	153	210	119	202	55	22	23	117	12	2	17	8	158	6	5	115	141	365	26	3		3	87	7	93	21	26	36	33	72	80	6	35	6	44	10	0	3	17	11
dme-mir-ITS1_9_28_+	9	28	.........TTGAAGGAATTGATATATG.........................................	19	TTGAAGGAATTGATATATG		260	154	290	107	270	214	163	114	3	1	1	3	0	0	0	47	1	1	0	2	2	7	2		4	8	8	9	2	0	1	1	6	1	0	0	2	0	5	0	0	0	1
dme-mir-ITS1_8_28_+	8	28	........ATTGAAGGAATTGATATATG.........................................	20	ATTGAAGGAATTGATATATG		314	134	276	86	333	125	158	71	0	2	0	0	1	0	0	22	1	2	1	2	1	5	2		1	14	0	49	13	0	0	0	0	3	0	0	0	0	0	0	1	0	0
dme-mir-ITS1_7_33_+	7	33	.......TATTGAAGGAATTGATATATGCCAGT....................................	26	TATTGAAGGAATTGATATATGCCAGT		102	27	188	42	104	193	52	38	0	0	0	4	0	1	1	13	2	0	1	4	7	5	3		4	42	1	18	87	1	2	1	9	0	0	0	0	0	0	0	3	0	0
dme-mir-ITS1_40_62_+	40	62	........................................TGTATTTTTAATTTCTTTCAAT.......	22	TGTATTTTTAATTTCTTTCAAT		73	14	55	54	10	10	11	19	12	35	35	9	3	8	7	1	8	17	132	42	59	9	0		7	3	0	215	12	2	8	15	26	4	0	0	0	0	0	0	7	0	0
dme-mir-ITS1_8_31_+	8	31	........ATTGAAGGAATTGATATATGCCA......................................	23	ATTGAAGGAATTGATATATGCCA		347	98	277	62	192	64	129	67	0	0	1	1	0	1	0	1	0	1	1	0	5	4	0		0	0	0	3	3	0	0	0	1	0	0	0	0	0	0	0	0	0	0
dme-mir-ITS1_40_63_+	40	63	........................................TGTATTTTTAATTTCTTTCAATA......	23	TGTATTTTTAATTTCTTTCAATA		32	35	42	36	74	9	51	33	3	2	1	1	1	0	3	2	1	4	60	57	102	1	0		32	13	1	327	30	1	0	0	1	0	0	0	0	0	0	0	0	0	0
dme-mir-ITS1_7_26_+	7	26	.......TATTGAAGGAATTGATATA...........................................	19	TATTGAAGGAATTGATATA		78	23	91	38	89	17	60	70	3	0	14	0	0	2	0	27	0	0	6	2	16	43	5		2	15	0	18	30	1	1	3	3	15	3	0	10	0	0	0	0	0	1
dme-mir-ITS1_7_32_+	7	32	.......TATTGAAGGAATTGATATATGCCAG.....................................	25	TATTGAAGGAATTGATATATGCCAG		41	12	48	17	94	185	63	75	0	2	3	8	0	0	3	2	1	6	1	2	1	21	0		1	2	1	8	30	3	7	1	16	3	0	3	0	0	0	0	4	0	0
dme-mir-ITS1_40_65_+	40	65	........................................TGTATTTTTAATTTCTTTCAATAAA....	25	TGTATTTTTAATTTCTTTCAATAAA		86	23	62	87	21	20	23	21	4	4	15	25	0	0	15	0	17	19	31	1	1	1	0		1	1	0	43	6	3	6	0	13	8	0	7	0	0	0	0	3	0	0
dme-mir-ITS1_10_32_+	10	32	..........TGAAGGAATTGATATATGCCAG.....................................	22	TGAAGGAATTGATATATGCCAG		132	76	215	79	66	33	43	35	3	3	8	4	0	3	3	3	6	5	4	4	2	2	3		0	1	0	1	0	1	0	2	7	0	0	0	0	0	0	0	0	0	0
dme-mir-ITS1_6_27_+	6	27	......TTATTGAAGGAATTGATATAT..........................................	21	TTATTGAAGGAATTGATATAT		70	22	78	23	47	15	35	9	15	24	22	9	3	3	1	26	6	3	49	17	44	3	2		0	5	1	3	3	9	6	3	8	6	0	0	0	0	0	0	0	0	1
dme-mir-ITS1_40_64_+	40	64	........................................TGTATTTTTAATTTCTTTCAATAA.....	24	TGTATTTTTAATTTCTTTCAATAA		21	8	40	37	14	2	16	8	4	6	16	14	0	4	4	0	20	15	47	26	42	0	0		1	0	0	56	4	11	7	1	14	0	0	0	0	0	0	0	0	0	0
dme-mir-ITS1_6_32_+	6	32	......TTATTGAAGGAATTGATATATGCCAG.....................................	26	TTATTGAAGGAATTGATATATGCCAG		9	1	17	7	43	85	37	53	0	0	1	2	0	0	1	1	1	6	2	1	3	6	0		0	0	3	1	8	2	8	0	16	5	0	0	0	0	0	0	0	0	0
dme-mir-ITS1_10_35_+	10	35	..........TGAAGGAATTGATATATGCCAGTAA..................................	25	TGAAGGAATTGATATATGCCAGTAA		56	24	86	32	23	23	18	13	1	5	4	9	0	0	2	0	0	2	1	1	0	1	0		0	0	0	1	0	4	3	0	8	0	0	0	0	0	0	0	0	0	0
dme-mir-ITS1_5_29_+	5	29	.....TTTATTGAAGGAATTGATATATGC........................................	24	TTTATTGAAGGAATTGATATATGC		10	6	9	10	33	51	20	30	0	0	0	2	0	0	3	2	0	0	1	56	81	11	31		25	3	0	0	2	0	1	0	0	0	0	0	0	0	0	0	0	3	0
dme-mir-ITS1_41_62_+	41	62	.........................................GTATTTTTAATTTCTTTCAAT.......	21	GTATTTTTAATTTCTTTCAAT		11	0	9	2	1	0	2	2	3	20	17	3	1	0	1	0	1	2	49	8	27	0	0		1	0	0	81	5	5	11	7	11	2	0	0	0	0	0	0	0	0	0
dme-mir-ITS1_6_31_+	6	31	......TTATTGAAGGAATTGATATATGCCA......................................	25	TTATTGAAGGAATTGATATATGCCA		37	12	63	16	20	50	17	33	0	0	2	2	0	0	1	1	3	2	0	17	15	5	4		17	3	0	3	8	0	0	1	3	0	0	0	0	0	0	0	0	0	0
dme-mir-ITS1_6_33_+	6	33	......TTATTGAAGGAATTGATATATGCCAGT....................................	27	TTATTGAAGGAATTGATATATGCCAGT		26	4	72	8	18	30	15	8	1	0	0	0	0	0	0	4	0	1	0	4	4	6	8		34	12	2	10	22	0	8	0	1	0	0	0	0	0	0	0	0	0	0
dme-mir-ITS1_10_30_+	10	30	..........TGAAGGAATTGATATATGCC.......................................	20	TGAAGGAATTGATATATGCC		49	12	42	17	20	9	12	13	0	0	0	0	0	0	0	4	0	1	0	1	1	1	11		3	0	2	25	23	0	0	1	0	1	0	6	0	0	0	0	0	0	0
dme-mir-ITS1_1_26_+	1	26	.TACATTTATTGAAGGAATTGATATA...........................................	25	TACATTTATTGAAGGAATTGATATA		2	0	0	0	59	70	38	57	0	0	0	2	0	0	1	0	0	1	1	0	0	11	0		0	0	1	1	1	0	0	0	0	2	0	0	1	0	0	0	0	0	0
dme-mir-ITS1_32_57_+	32	57	................................TAAAATGGTGTATTTTTAATTTCTT............	25	TAAAATGGTGTATTTTTAATTTCTT		0	0	0	0	0	0	0	0	0	0	0	13	0	0	2	0	2	1	0	0	0	0	0		0	0	0	0	0	2	2	0	36	0	0	0	0	0	0	0	0	0	0
dme-mir-ITS1_32_58_+	32	58	................................TAAAATGGTGTATTTTTAATTTCTTT...........	26	TAAAATGGTGTATTTTTAATTTCTTT		0	0	0	0	0	0	0	0	0	0	1	5	0	0	6	0	0	1	0	0	0	0	0		0	0	0	0	0	0	0	1	42	0	0	0	0	0	0	0	0	0	0
dme-mir-ITS1_9_33_+	9	33	.........TTGAAGGAATTGATATATGCCAGT....................................	24	TTGAAGGAATTGATATATGCCAGT		26	10	44	13	17	25	9	9	0	1	2	0	0	0	0	0	0	0	0	0	5	1	2		1	2	0	13	22	2	5	0	0	0	0	0	0	0	0	0	0	0	0
dme-mir-ITS1_10_33_+	10	33	..........TGAAGGAATTGATATATGCCAGT....................................	23	TGAAGGAATTGATATATGCCAGT		41	21	37	12	23	11	19	10	1	4	5	1	0	1	1	3	0	0	2	0	3	1	1		0	1	0	2	2	0	0	1	2	0	0	0	0	0	0	0	0	0	0
dme-mir-ITS1_41_63_+	41	63	.........................................GTATTTTTAATTTCTTTCAATA......	22	GTATTTTTAATTTCTTTCAATA		3	1	2	1	8	1	9	0	1	0	1	0	0	0	1	0	1	1	8	8	18	0	0		5	4	1	135	7	1	2	0	0	0	0	0	0	0	0	0	0	0	0
dme-mir-ITS1_10_34_+	10	34	..........TGAAGGAATTGATATATGCCAGTA...................................	24	TGAAGGAATTGATATATGCCAGTA		35	9	59	20	32	14	7	8	0	7	12	1	0	0	0	2	1	2	1	0	4	0	0		0	0	0	0	1	1	0	1	1	0	0	0	0	0	0	0	0	0	0
dme-mir-ITS1_6_26_+	6	26	......TTATTGAAGGAATTGATATA...........................................	20	TTATTGAAGGAATTGATATA		17	8	15	1	18	3	12	12	3	1	4	0	0	0	1	12	0	0	4	1	4	4	9		2	1	1	8	15	0	2	3	0	0	0	0	2	0	9	0	0	0	0
dme-mir-ITS1_5_32_+	5	32	.....TTTATTGAAGGAATTGATATATGCCAG.....................................	27	TTTATTGAAGGAATTGATATATGCCAG		10	4	15	5	8	46	15	41	0	0	0	0	0	0	0	0	0	0	0	0	0	0	0		1	0	0	2	5	0	1	0	4	0	0	0	0	0	0	0	0	0	0
dme-mir-ITS1_40_61_+	40	61	........................................TGTATTTTTAATTTCTTTCAA........	21	TGTATTTTTAATTTCTTTCAA		4	1	4	3	0	0	0	0	0	4	8	2	1	1	0	0	2	2	22	3	6	0	0		0	0	0	62	1	0	0	3	11	0	0	0	0	0	0	0	0	0	0
dme-mir-ITS1_7_25_+	7	25	.......TATTGAAGGAATTGATAT............................................	18	TATTGAAGGAATTGATAT		7	3	5	4	3	1	6	2	0	2	3	1	0	0	1	4	0	0	2	11	28	1	6		1	4	1	4	6	0	0	6	3	2	0	0	0	0	0	0	3	0	0
dme-mir-ITS1_10_36_+	10	36	..........TGAAGGAATTGATATATGCCAGTAAA.................................	26	TGAAGGAATTGATATATGCCAGTAAA		38	8	45	23	22	13	12	11	0	0	0	0	0	0	1	2	0	0	0	0	0	0	0		0	0	0	0	0	0	0	0	4	0	0	0	0	0	0	0	0	0	0
dme-mir-ITS1_4_29_+	4	29	....ATTTATTGAAGGAATTGATATATGC........................................	25	ATTTATTGAAGGAATTGATATATGC		5	2	2	1	20	25	10	20	0	0	0	2	0	0	0	0	0	1	0	6	9	1	6		26	2	1	1	2	0	0	1	0	1	0	0	1	0	0	6	1	0	0
dme-mir-ITS1_5_31_+	5	31	.....TTTATTGAAGGAATTGATATATGCCA......................................	26	TTTATTGAAGGAATTGATATATGCCA		16	1	14	9	5	17	10	24	0	0	0	1	0	0	0	0	0	1	0	13	8	0	3		12	3	1	1	3	1	1	0	3	0	0	2	0	0	0	0	0	0	0
dme-mir-ITS1_6_30_+	6	30	......TTATTGAAGGAATTGATATATGCC.......................................	24	TTATTGAAGGAATTGATATATGCC		3	0	2	0	4	2	2	5	2	1	1	1	1	0	1	0	2	0	0	22	28	1	0		11	0	0	7	46	0	0	0	1	0	0	0	0	0	0	0	0	0	0
dme-mir-ITS1_9_37_+	9	37	.........TTGAAGGAATTGATATATGCCAGTAAAA................................	28	TTGAAGGAATTGATATATGCCAGTAAAA		3	0	1	0	2	95	3	31	0	0	0	0	0	0	0	0	0	0	0	0	0	0	0		0	0	0	0	0	0	0	0	0	0	0	0	0	0	0	0	0	0	0
dme-mir-ITS1_10_29_+	10	29	..........TGAAGGAATTGATATATGC........................................	19	TGAAGGAATTGATATATGC		26	2	10	7	2	3	6	5	0	1	3	4	0	0	2	2	4	0	0	0	0	6	3		2	0	1	8	3	0	0	1	0	0	0	0	0	0	0	0	0	0	0
dme-mir-ITS1_41_64_+	41	64	.........................................GTATTTTTAATTTCTTTCAATAA.....	23	GTATTTTTAATTTCTTTCAATAA		3	0	0	2	2	0	4	0	1	3	8	2	0	1	0	0	4	4	26	4	1	0	0		1	0	0	34	0	0	2	0	0	0	0	0	0	0	0	0	0	0	0
dme-mir-ITS1_4_27_+	4	27	....ATTTATTGAAGGAATTGATATAT..........................................	23	ATTTATTGAAGGAATTGATATAT		2	4	7	6	1	0	1	2	0	0	0	0	0	0	0	2	0	0	2	37	68	2	4		1	4	0	1	0	0	0	1	0	0	0	0	2	0	0	0	0	0	1
dme-mir-ITS1_32_56_+	32	56	................................TAAAATGGTGTATTTTTAATTTCT.............	24	TAAAATGGTGTATTTTTAATTTCT		0	0	0	0	0	0	0	0	0	0	0	5	0	0	5	0	1	1	0	0	0	0	0		0	0	0	0	0	1	2	2	37	0	0	0	0	0	0	0	0	0	0
dme-mir-ITS1_10_37_+	10	37	..........TGAAGGAATTGATATATGCCAGTAAAA................................	27	TGAAGGAATTGATATATGCCAGTAAAA		3	2	5	5	6	32	3	17	0	0	0	0	0	0	0	0	0	0	0	0	0	6	0		1	0	0	0	0	0	0	0	4	0	0	0	0	0	0	0	0	0	0
dme-mir-ITS1_1_24_+	1	24	.TACATTTATTGAAGGAATTGATA.............................................	23	TACATTTATTGAAGGAATTGATA		1	0	0	2	23	30	11	23	0	0	0	1	0	0	0	0	0	0	0	1	2	9	0		0	0	0	0	2	1	0	0	0	0	0	0	0	0	0	0	0	0	0
dme-mir-ITS1_4_25_+	4	25	....ATTTATTGAAGGAATTGATAT............................................	21	ATTTATTGAAGGAATTGATAT		5	9	13	7	8	2	5	10	0	0	0	0	0	0	0	2	0	0	1	5	14	1	5		1	4	0	0	1	0	0	0	0	5	0	0	0	0	0	0	0	0	0
dme-mir-ITS1_6_25_+	6	25	......TTATTGAAGGAATTGATAT............................................	19	TTATTGAAGGAATTGATAT		3	5	1	1	4	2	3	2	0	3	2	0	0	0	0	0	1	4	3	3	9	4	12		0	1	0	3	0	2	1	0	2	0	0	0	0	5	0	0	0	0	0
dme-mir-ITS1_40_60_+	40	60	........................................TGTATTTTTAATTTCTTTCA.........	20	TGTATTTTTAATTTCTTTCA		1	0	1	0	0	0	0	0	0	5	1	1	1	0	0	0	0	0	34	9	16	0	0		0	0	0	7	0	4	2	5	9	0	0	0	0	0	0	0	0	0	0
dme-mir-ITS1_41_65_+	41	65	.........................................GTATTTTTAATTTCTTTCAATAAA....	24	GTATTTTTAATTTCTTTCAATAAA		5	0	1	2	5	1	2	1	1	1	3	4	0	0	2	0	0	2	12	0	0	0	0		0	0	0	31	0	0	1	2	3	0	0	0	0	0	0	0	0	0	0
dme-mir-ITS1_5_24_+	5	24	.....TTTATTGAAGGAATTGATA.............................................	19	TTTATTGAAGGAATTGATA		16	7	15	3	10	11	4	6	0	0	1	0	0	0	0	0	2	0	0	3	6	3	5		1	1	0	4	10	0	0	1	1	0	0	0	0	0	0	0	0	0	0
dme-mir-ITS1_5_33_+	5	33	.....TTTATTGAAGGAATTGATATATGCCAGT....................................	28	TTTATTGAAGGAATTGATATATGCCAGT		19	4	27	7	0	11	2	3	0	0	0	0	0	0	0	0	0	0	0	3	0	0	0		8	0	0	3	10	0	0	0	0	0	0	0	0	0	0	0	0	0	0
dme-mir-ITS1_9_35_+	9	35	.........TTGAAGGAATTGATATATGCCAGTAA..................................	26	TTGAAGGAATTGATATATGCCAGTAA		7	2	19	10	11	19	10	11	0	1	0	1	0	0	0	0	1	3	0	0	0	2	0		0	0	0	0	2	1	0	0	0	0	0	0	0	0	0	0	0	0	0
dme-mir-ITS1_4_23_+	4	23	....ATTTATTGAAGGAATTGAT..............................................	19	ATTTATTGAAGGAATTGAT		1	4	4	2	4	1	9	1	0	0	0	0	0	0	0	4	0	0	2	0	2	0	2		6	10	1	0	6	0	0	0	1	0	0	0	1	0	0	0	0	3	0
dme-mir-ITS1_5_26_+	5	26	.....TTTATTGAAGGAATTGATATA...........................................	21	TTTATTGAAGGAATTGATATA		1	3	12	2	5	13	11	13	0	0	0	1	0	0	0	2	0	0	0	1	2	1	2		1	6	0	8	19	0	0	0	0	0	0	0	2	0	0	0	0	0	0
dme-mir-ITS1_5_25_+	5	25	.....TTTATTGAAGGAATTGATAT............................................	20	TTTATTGAAGGAATTGATAT		10	7	29	9	1	1	8	8	0	0	1	0	0	0	0	0	0	0	1	3	8	1	6		0	0	0	0	2	0	0	0	0	0	0	0	0	0	0	0	0	0	0
dme-mir-ITS1_40_66_+	40	66	........................................TGTATTTTTAATTTCTTTCAATAAAA...	26	TGTATTTTTAATTTCTTTCAATAAAA		19	4	11	13	5	4	10	2	0	0	0	2	0	0	0	0	1	1	0	0	0	1	0		0	0	0	9	1	0	0	0	2	0	0	0	0	0	0	0	0	0	0
dme-mir-ITS1_8_27_+	8	27	........ATTGAAGGAATTGATATAT..........................................	19	ATTGAAGGAATTGATATAT		28	5	14	3	2	2	2	0	0	1	0	1	0	0	0	1	0	0	1	1	4	0	0		0	1	0	6	1	0	0	0	0	3	0	0	0	0	0	0	0	0	0
dme-mir-ITS1_4_24_+	4	24	....ATTTATTGAAGGAATTGATA.............................................	20	ATTTATTGAAGGAATTGATA		1	5	5	2	3	5	5	12	0	1	0	0	0	0	0	2	0	0	0	0	1	0	11		1	1	0	1	8	0	0	0	0	1	0	0	0	0	0	0	0	3	0
dme-mir-ITS1_5_28_+	5	28	.....TTTATTGAAGGAATTGATATATG.........................................	23	TTTATTGAAGGAATTGATATATG		5	2	5	1	5	7	11	4	0	0	0	0	0	0	0	1	0	0	0	1	2	0	3		11	3	0	1	0	0	0	0	0	0	0	0	0	0	0	0	1	0	0
dme-mir-ITS1_37_63_+	37	63	.....................................TGGTGTATTTTTAATTTCTTTCAATA......	26	TGGTGTATTTTTAATTTCTTTCAATA		1	0	0	0	0	0	0	0	0	0	0	3	0	0	1	0	0	1	0	0	0	0	0		1	0	0	0	0	1	0	1	11	0	0	0	0	0	0	0	0	0	0
dme-mir-ITS1_11_31_+	11	31	...........GAAGGAATTGATATATGCCA......................................	20	GAAGGAATTGATATATGCCA		34	0	9	2	0	0	1	3	1	0	0	0	0	0	0	0	0	2	0	0	0	0	0		0	0	1	1	0	0	0	0	25	0	0	0	0	0	0	0	0	0	0
dme-mir-ITS1_6_24_+	6	24	......TTATTGAAGGAATTGATA.............................................	18	TTATTGAAGGAATTGATA		1	0	0	0	0	0	5	1	0	0	1	0	0	0	1	0	0	1	0	0	2	0	22		1	0	1	3	10	0	0	1	0	0	0	0	1	0	0	0	0	0	0
dme-mir-ITS1_7_34_+	7	34	.......TATTGAAGGAATTGATATATGCCAGTA...................................	27	TATTGAAGGAATTGATATATGCCAGTA		0	0	0	0	0	2	3	4	0	0	2	0	0	0	0	0	0	0	1	1	0	0	0		0	1	0	7	10	0	3	0	3	0	0	0	0	0	0	0	0	0	0
dme-mir-ITS1_8_33_+	8	33	........ATTGAAGGAATTGATATATGCCAGT....................................	25	ATTGAAGGAATTGATATATGCCAGT		2	0	4	0	9	12	6	9	0	0	0	0	0	0	0	0	0	0	0	0	0	0	0		1	1	0	4	9	0	0	0	0	0	0	0	0	0	0	0	0	0	0
dme-mir-ITS1_3_29_+	3	29	...CATTTATTGAAGGAATTGATATATGC........................................	26	CATTTATTGAAGGAATTGATATATGC		0	0	0	0	7	5	5	11	0	0	0	2	0	0	1	0	0	1	0	0	0	2	3		5	0	2	0	0	2	0	0	4	0	0	0	0	0	5	0	0	0	0
dme-mir-ITS1_4_30_+	4	30	....ATTTATTGAAGGAATTGATATATGCC.......................................	26	ATTTATTGAAGGAATTGATATATGCC		1	0	2	3	1	1	2	6	0	0	0	0	0	0	0	0	0	0	0	1	2	0	0		18	0	0	2	20	0	0	0	0	0	0	0	0	0	0	0	0	0	0
dme-mir-ITS1_4_32_+	4	32	....ATTTATTGAAGGAATTGATATATGCCAG.....................................	28	ATTTATTGAAGGAATTGATATATGCCAG		0	4	5	0	0	38	3	13	0	0	0	0	0	0	0	0	0	0	0	0	0	0	0		0	0	0	2	4	0	0	0	0	0	0	0	0	0	0	0	0	0	0
dme-mir-ITS1_5_30_+	5	30	.....TTTATTGAAGGAATTGATATATGCC.......................................	25	TTTATTGAAGGAATTGATATATGCC		0	0	0	0	2	2	1	4	0	0	0	0	0	0	0	0	0	0	1	7	13	0	1		5	0	0	6	15	0	0	0	3	0	0	0	0	0	0	0	0	0	0
dme-mir-ITS1_10_38_+	10	38	..........TGAAGGAATTGATATATGCCAGTAAAAT...............................	28	TGAAGGAATTGATATATGCCAGTAAAAT		3	1	11	18	0	17	0	10	0	0	0	0	0	0	0	1	0	0	0	0	0	0	0		0	0	0	0	0	0	0	0	0	0	0	0	0	0	0	0	0	0	0
dme-mir-ITS1_4_28_+	4	28	....ATTTATTGAAGGAATTGATATATG.........................................	24	ATTTATTGAAGGAATTGATATATG		0	2	2	0	9	7	6	5	0	0	0	0	0	0	0	2	0	0	0	1	2	1	0		10	1	0	0	0	0	0	0	1	0	0	0	1	0	0	0	0	0	0
dme-mir-ITS1_4_26_+	4	26	....ATTTATTGAAGGAATTGATATA...........................................	22	ATTTATTGAAGGAATTGATATA		3	1	2	7	7	2	3	8	0	0	0	0	0	0	0	1	0	0	0	0	3	0	6		0	4	0	0	6	0	0	0	0	0	0	0	1	0	0	0	0	0	1
dme-mir-ITS1_26_45_+	26	45	..........................TGCCAGTAAAATGGTGTAT........................	19	TGCCAGTAAAATGGTGTAT		0	0	0	0	0	0	0	0	0	0	0	0	0	0	0	0	0	0	0	0	0	0	0		0	0	0	0	0	2	0	12	33	0	0	0	0	0	0	0	0	0	0
dme-mir-ITS1_9_36_+	9	36	.........TTGAAGGAATTGATATATGCCAGTAAA.................................	27	TTGAAGGAATTGATATATGCCAGTAAA		7	0	3	10	2	15	5	9	0	0	0	0	0	0	0	0	0	0	0	0	0	0	0		0	0	0	0	5	0	0	0	0	0	0	0	0	0	0	0	0	0	0
dme-mir-ITS1_9_32_+	9	32	.........TTGAAGGAATTGATATATGCCAG.....................................	23	TTGAAGGAATTGATATATGCCAG		12	5	13	7	2	3	3	3	0	0	0	0	0	0	0	0	0	0	0	0	1	1	0		0	0	0	0	0	0	0	0	0	0	0	0	0	0	0	0	0	0	0
dme-mir-ITS1_37_61_+	37	61	.....................................TGGTGTATTTTTAATTTCTTTCAA........	24	TGGTGTATTTTTAATTTCTTTCAA		0	0	0	0	1	0	0	1	0	1	0	6	0	0	4	0	3	0	0	0	0	0	0		0	0	0	0	0	0	0	1	1	0	0	0	0	0	0	0	0	0	0
dme-mir-ITS1_5_27_+	5	27	.....TTTATTGAAGGAATTGATATAT..........................................	22	TTTATTGAAGGAATTGATATAT		4	0	1	1	2	1	1	1	0	0	2	0	0	0	0	2	0	0	1	7	16	0	0		0	1	0	0	1	0	3	0	1	0	0	0	0	0	0	0	0	0	0
dme-mir-ITS1_41_61_+	41	61	.........................................GTATTTTTAATTTCTTTCAA........	20	GTATTTTTAATTTCTTTCAA		0	0	0	0	0	0	0	0	1	0	3	1	0	0	0	0	0	1	9	3	2	0	0		0	0	0	13	0	0	2	2	0	0	0	0	0	0	0	0	0	0	0
dme-mir-ITS1_7_35_+	7	35	.......TATTGAAGGAATTGATATATGCCAGTAA..................................	28	TATTGAAGGAATTGATATATGCCAGTAA		10	1	7	7	1	8	2	8	0	0	0	0	0	0	0	1	0	0	0	2	0	0	0		1	0	0	1	4	0	0	0	0	0	0	0	0	0	0	0	0	0	0
dme-mir-ITS1_32_55_+	32	55	................................TAAAATGGTGTATTTTTAATTTC..............	23	TAAAATGGTGTATTTTTAATTTC		0	0	0	0	0	0	0	0	1	0	0	1	0	0	0	0	0	0	0	0	0	0	0		0	0	0	0	0	0	0	0	3	0	0	0	0	0	0	0	0	0	0
dme-mir-ITS1_41_60_+	41	60	.........................................GTATTTTTAATTTCTTTCA.........	19	GTATTTTTAATTTCTTTCA		0	0	0	0	0	0	0	0	1	1	4	0	0	1	1	0	0	0	15	6	10	0	0		0	0	0	0	0	0	1	0	0	0	0	0	0	0	0	0	0	0	0
dme-mir-ITS1_1_28_+	1	28	.TACATTTATTGAAGGAATTGATATATG.........................................	27	TACATTTATTGAAGGAATTGATATATG		0	0	0	0	7	7	6	9	0	0	0	0	0	0	0	0	0	0	0	0	0	3	0		0	0	0	0	0	0	0	0	0	0	0	0	0	0	0	0	0	0	0
dme-mir-ITS1_1_27_+	1	27	.TACATTTATTGAAGGAATTGATATAT..........................................	26	TACATTTATTGAAGGAATTGATATAT		0	1	0	1	4	9	5	2	0	0	0	0	0	0	0	0	0	0	0	0	3	1	0		0	0	0	3	5	0	0	0	0	0	0	0	0	0	0	0	0	0	0
dme-mir-ITS1_1_29_+	1	29	.TACATTTATTGAAGGAATTGATATATGC........................................	28	TACATTTATTGAAGGAATTGATATATGC		0	0	1	0	0	8	1	6	0	0	0	0	0	0	0	0	0	0	0	1	0	0	0		0	0	0	0	0	0	0	0	0	0	0	0	0	0	0	0	0	0	0
dme-mir-ITS1_32_59_+	32	59	................................TAAAATGGTGTATTTTTAATTTCTTTC..........	27	TAAAATGGTGTATTTTTAATTTCTTTC		0	0	0	0	0	0	0	0	0	0	0	1	0	0	0	0	0	0	0	0	0	0	0		0	0	0	0	0	0	2	0	4	0	0	0	0	0	0	0	0	0	0
dme-mir-ITS1_37_64_+	37	64	.....................................TGGTGTATTTTTAATTTCTTTCAATAA.....	27	TGGTGTATTTTTAATTTCTTTCAATAA		0	0	0	0	0	0	0	0	0	0	0	0	0	0	1	0	0	1	0	0	0	0	0		1	0	0	0	0	0	0	0	7	0	0	0	0	0	0	0	0	0	0
dme-mir-ITS1_9_34_+	9	34	.........TTGAAGGAATTGATATATGCCAGTA...................................	25	TTGAAGGAATTGATATATGCCAGTA		3	0	8	0	1	5	3	1	0	0	0	0	0	0	0	0	0	3	0	0	0	0	0		0	0	0	0	0	0	0	0	1	0	0	0	0	0	0	0	0	0	0
dme-mir-ITS1_10_28_+	10	28	..........TGAAGGAATTGATATATG.........................................	18	TGAAGGAATTGATATATG		7	5	4	2	5	4	3	7	0	0	0	0	0	0	0	1	0	0	0	0	0	0	1		0	0	0	0	0	0	0	0	0	0	0	0	0	0	0	0	0	0	0
dme-mir-ITS1_42_65_+	42	65	..........................................TATTTTTAATTTCTTTCAATAAA....	23	TATTTTTAATTTCTTTCAATAAA		2	0	3	4	0	1	0	1	0	0	0	0	0	0	0	0	0	0	4	1	2	0	0		1	0	0	25	0	0	0	0	0	0	0	0	0	0	0	0	0	0	0
dme-mir-ITS1_42_63_+	42	63	..........................................TATTTTTAATTTCTTTCAATA......	21	TATTTTTAATTTCTTTCAATA		0	0	0	0	0	0	0	0	0	0	0	1	0	0	0	0	0	0	2	4	14	0	0		1	0	0	22	1	0	0	0	1	0	0	0	0	0	0	0	0	0	0
dme-mir-ITS1_5_23_+	5	23	.....TTTATTGAAGGAATTGAT..............................................	18	TTTATTGAAGGAATTGAT		0	0	0	1	1	0	1	2	0	0	0	0	0	1	0	0	1	0	0	0	0	0	0		0	0	0	0	9	0	1	1	3	0	0	0	0	0	0	0	0	0	0
dme-mir-ITS1_0_22_+	0	22	ATACATTTATTGAAGGAATTGA...............................................	22	ATACATTTATTGAAGGAATTGA		2	0	6	9	4	1	0	12	0	0	0	0	0	0	0	0	0	0	0	0	0	0	0		0	1	0	0	0	0	0	3	0	0	0	0	0	0	0	0	0	0	0
dme-mir-ITS1_9_27_+	9	27	.........TTGAAGGAATTGATATAT..........................................	18	TTGAAGGAATTGATATAT		4	0	1	1	0	0	2	2	0	0	1	0	0	0	0	0	0	0	0	2	4	0	4		0	0	0	1	1	1	0	1	0	0	0	0	0	0	0	0	0	0	0
dme-mir-ITS1_1_25_+	1	25	.TACATTTATTGAAGGAATTGATAT............................................	24	TACATTTATTGAAGGAATTGATAT		0	0	2	3	0	1	3	1	0	1	0	0	0	0	1	1	0	0	1	1	8	1	0		1	1	0	0	0	0	0	0	0	0	0	0	0	0	0	0	0	0	0
dme-mir-ITS1_8_32_+	8	32	........ATTGAAGGAATTGATATATGCCAG.....................................	24	ATTGAAGGAATTGATATATGCCAG		1	0	2	0	4	6	5	14	0	0	0	0	0	0	0	0	0	0	0	0	1	0	0		1	0	0	1	0	0	0	0	5	0	0	0	0	0	0	0	0	0	0
dme-mir-ITS1_0_21_+	0	21	ATACATTTATTGAAGGAATTG................................................	21	ATACATTTATTGAAGGAATTG		0	14	0	6	1	3	2	5	0	0	0	0	0	0	0	0	0	0	0	0	0	0	0		0	1	0	0	0	0	0	2	0	0	0	0	0	0	0	0	0	0	0
dme-mir-ITS1_1_22_+	1	22	.TACATTTATTGAAGGAATTGA...............................................	21	TACATTTATTGAAGGAATTGA		1	2	2	4	2	2	1	6	0	0	0	0	0	0	0	1	0	0	0	0	0	0	0		0	0	0	2	2	0	0	2	0	0	0	0	0	0	0	0	0	0	0
dme-mir-ITS1_11_29_+	11	29	...........GAAGGAATTGATATATGC........................................	18	GAAGGAATTGATATATGC		7	1	2	0	2	0	0	0	0	0	0	0	0	0	1	0	0	0	0	0	0	4	0		0	0	1	0	0	0	0	1	0	0	0	0	0	0	0	0	0	0	0
dme-mir-ITS1_12_37_+	12	37	............AAGGAATTGATATATGCCAGTAAAA................................	25	AAGGAATTGATATATGCCAGTAAAA		0	0	0	0	5	2	0	18	0	0	0	1	0	0	2	0	0	0	0	0	0	4	0		0	0	0	0	0	0	0	0	0	0	0	0	0	0	0	0	0	0	0
dme-mir-ITS1_37_60_+	37	60	.....................................TGGTGTATTTTTAATTTCTTTCA.........	23	TGGTGTATTTTTAATTTCTTTCA		0	0	0	0	0	0	0	0	0	0	0	1	0	0	0	0	0	0	0	0	0	0	0		0	0	0	0	0	0	2	2	4	0	0	0	0	0	0	0	0	0	0
dme-mir-ITS1_42_64_+	42	64	..........................................TATTTTTAATTTCTTTCAATAA.....	22	TATTTTTAATTTCTTTCAATAA		1	0	0	0	0	0	0	0	1	1	0	0	0	0	0	0	0	0	2	1	1	0	0		0	0	0	17	2	0	1	0	0	0	0	0	0	0	0	0	0	0	0
dme-mir-ITS1_37_62_+	37	62	.....................................TGGTGTATTTTTAATTTCTTTCAAT.......	25	TGGTGTATTTTTAATTTCTTTCAAT		0	0	0	0	0	0	0	0	0	0	1	1	0	0	0	0	0	0	0	0	0	1	0		0	0	0	0	0	0	0	0	0	0	0	0	0	0	0	0	0	0	0
dme-mir-ITS1_11_30_+	11	30	...........GAAGGAATTGATATATGCC.......................................	19	GAAGGAATTGATATATGCC		12	1	0	0	4	1	0	1	0	0	0	0	0	0	0	0	0	0	0	0	0	1	0		1	0	0	5	2	0	0	0	0	0	0	0	0	0	0	0	0	0	0
dme-mir-ITS1_4_31_+	4	31	....ATTTATTGAAGGAATTGATATATGCCA......................................	27	ATTTATTGAAGGAATTGATATATGCCA		2	1	2	1	1	2	1	5	0	0	0	0	0	0	0	0	0	0	0	1	1	0	0		1	2	0	0	1	0	0	0	0	0	0	0	0	0	0	0	0	0	0
dme-mir-ITS1_1_23_+	1	23	.TACATTTATTGAAGGAATTGAT..............................................	22	TACATTTATTGAAGGAATTGAT		2	0	1	0	0	1	1	0	0	0	0	0	0	0	0	0	0	0	0	0	2	0	0		0	0	0	1	2	1	0	0	0	0	0	0	0	0	0	0	0	0	1
dme-mir-ITS1_43_63_+	43	63	...........................................ATTTTTAATTTCTTTCAATA......	20	ATTTTTAATTTCTTTCAATA		3	0	0	0	1	0	0	0	0	0	0	0	0	0	0	0	0	0	11	0	1	0	0		0	0	0	4	3	0	0	0	0	0	0	0	0	0	0	0	0	0	0
dme-mir-ITS1_11_33_+	11	33	...........GAAGGAATTGATATATGCCAGT....................................	22	GAAGGAATTGATATATGCCAGT		0	0	0	1	0	1	0	0	0	0	0	0	0	0	0	0	0	0	0	0	0	0	0		0	1	0	0	0	0	0	0	0	0	0	0	0	0	0	0	3	0	0
dme-mir-ITS1_37_59_+	37	59	.....................................TGGTGTATTTTTAATTTCTTTC..........	22	TGGTGTATTTTTAATTTCTTTC		5	1	5	0	0	0	1	1	0	0	1	2	0	0	0	0	0	0	0	0	0	0	0		0	0	0	0	0	0	1	0	2	0	0	0	0	0	0	0	0	0	0
dme-mir-ITS1_40_67_+	40	67	........................................TGTATTTTTAATTTCTTTCAATAAAAA..	27	TGTATTTTTAATTTCTTTCAATAAAAA		6	1	5	0	2	2	2	1	0	0	0	0	0	0	0	0	0	0	0	0	0	0	0		0	0	0	2	0	0	0	0	1	0	0	0	0	0	0	0	0	0	0
dme-mir-ITS1_3_28_+	3	28	...CATTTATTGAAGGAATTGATATATG.........................................	25	CATTTATTGAAGGAATTGATATATG		0	0	0	0	4	4	4	1	0	0	0	0	0	0	0	1	0	0	0	0	0	1	0		3	0	0	0	0	0	0	0	0	0	0	0	0	0	0	0	0	0	0
dme-mir-ITS1_4_22_+	4	22	....ATTTATTGAAGGAATTGA...............................................	18	ATTTATTGAAGGAATTGA		0	0	0	0	4	0	1	4	0	0	0	0	0	0	0	0	0	0	1	0	0	0	2		0	1	0	0	0	0	0	0	0	0	0	0	0	0	0	0	0	0	0
dme-mir-ITS1_12_31_+	12	31	............AAGGAATTGATATATGCCA......................................	19	AAGGAATTGATATATGCCA		21	1	2	1	0	0	0	0	0	0	0	1	0	0	0	0	0	0	0	0	0	0	0		0	0	0	0	0	0	0	0	0	0	0	0	0	0	0	0	0	0	0
dme-mir-ITS1_43_65_+	43	65	...........................................ATTTTTAATTTCTTTCAATAAA....	22	ATTTTTAATTTCTTTCAATAAA		1	0	1	2	0	0	0	1	0	0	0	0	0	0	0	0	0	0	4	0	1	0	0		0	0	0	7	0	0	1	0	2	0	0	0	0	0	0	0	0	0	0
dme-mir-ITS1_43_62_+	43	62	...........................................ATTTTTAATTTCTTTCAAT.......	19	ATTTTTAATTTCTTTCAAT		0	0	0	0	0	0	0	0	1	0	1	0	0	0	0	0	0	0	6	4	6	0	0		0	0	0	2	1	0	0	0	0	0	0	0	0	0	0	0	0	0	0
dme-mir-ITS1_2_26_+	2	26	..ACATTTATTGAAGGAATTGATATA...........................................	24	ACATTTATTGAAGGAATTGATATA		0	0	0	0	5	10	3	3	0	0	0	0	0	0	0	0	0	0	0	0	0	0	0		0	0	1	0	0	0	0	0	0	0	0	0	0	0	0	0	0	0	0
dme-mir-ITS1_35_61_+	35	61	...................................AATGGTGTATTTTTAATTTCTTTCAA........	26	AATGGTGTATTTTTAATTTCTTTCAA		0	0	0	0	0	0	0	0	0	0	1	0	0	0	0	0	0	2	0	0	0	0	0		0	0	0	0	0	0	0	0	6	0	0	0	0	0	0	0	0	0	0
dme-mir-ITS1_2_29_+	2	29	..ACATTTATTGAAGGAATTGATATATGC........................................	27	ACATTTATTGAAGGAATTGATATATGC		0	0	0	0	0	1	0	3	0	0	0	0	0	0	0	0	0	0	0	0	0	2	0		0	0	1	0	0	1	0	0	0	0	0	0	0	0	0	0	0	0	0
dme-mir-ITS1_14_39_+	14	39	..............GGAATTGATATATGCCAGTAAAATG..............................	25	GGAATTGATATATGCCAGTAAAATG		0	0	0	0	1	0	0	0	0	0	0	2	0	0	1	0	2	7	0	0	0	0	0		0	0	0	0	0	0	0	0	2	0	0	0	0	0	0	0	0	0	0
dme-mir-ITS1_8_26_+	8	26	........ATTGAAGGAATTGATATA...........................................	18	ATTGAAGGAATTGATATA		0	0	0	2	3	1	3	3	0	0	0	0	0	0	0	0	0	0	1	0	0	1	0		0	0	0	0	3	0	0	0	0	0	0	0	0	0	0	0	0	0	0
dme-mir-ITS1_25_43_+	25	43	.........................ATGCCAGTAAAATGGTGT..........................	18	ATGCCAGTAAAATGGTGT		0	0	0	0	0	0	0	0	0	1	0	1	0	0	1	0	0	0	0	0	0	0	0		0	0	0	0	0	0	0	0	7	0	0	0	0	0	0	0	0	0	0
dme-mir-ITS1_34_61_+	34	61	..................................AAATGGTGTATTTTTAATTTCTTTCAA........	27	AAATGGTGTATTTTTAATTTCTTTCAA		0	0	0	0	0	0	0	0	0	0	0	0	0	0	0	0	0	0	0	0	0	0	0		0	0	0	0	0	0	0	1	6	0	0	0	0	0	0	0	0	0	0
dme-mir-ITS1_38_60_+	38	60	......................................GGTGTATTTTTAATTTCTTTCA.........	22	GGTGTATTTTTAATTTCTTTCA		0	0	0	0	0	0	0	0	0	0	0	1	0	1	0	0	1	0	0	0	0	0	0		1	0	0	0	0	0	0	2	11	0	0	0	0	0	0	0	0	0	0
dme-mir-ITS1_3_24_+	3	24	...CATTTATTGAAGGAATTGATA.............................................	21	CATTTATTGAAGGAATTGATA		0	5	0	1	0	2	0	0	0	0	0	0	0	0	0	0	0	0	0	0	0	0	7		1	0	0	0	0	0	0	0	0	0	0	0	0	0	0	0	0	0	0
dme-mir-ITS1_6_34_+	6	34	......TTATTGAAGGAATTGATATATGCCAGTA...................................	28	TTATTGAAGGAATTGATATATGCCAGTA		1	0	3	3	0	2	1	1	0	0	0	0	0	0	0	1	0	0	0	0	0	1	0		0	0	0	0	2	0	0	0	0	0	0	0	0	0	0	0	0	0	0
dme-mir-ITS1_23_44_+	23	44	.......................ATATGCCAGTAAAATGGTGTA.........................	21	ATATGCCAGTAAAATGGTGTA		0	0	0	0	0	0	0	0	1	0	1	1	0	0	0	0	0	0	0	0	0	0	0		0	0	0	0	0	0	0	1	12	0	0	0	0	0	0	0	0	0	0
dme-mir-ITS1_24_43_+	24	43	........................TATGCCAGTAAAATGGTGT..........................	19	TATGCCAGTAAAATGGTGT		0	0	0	0	0	0	0	0	0	0	0	0	0	0	0	0	0	0	0	0	0	0	0		0	0	0	0	2	0	0	2	10	0	0	0	0	0	0	0	0	0	0
dme-mir-ITS1_39_63_+	39	63	.......................................GTGTATTTTTAATTTCTTTCAATA......	24	GTGTATTTTTAATTTCTTTCAATA		13	0	1	1	1	0	2	0	0	0	0	0	0	0	0	0	0	0	0	0	1	0	0		0	1	0	0	0	0	0	0	0	0	0	0	0	0	0	0	0	0	0
dme-mir-ITS1_43_64_+	43	64	...........................................ATTTTTAATTTCTTTCAATAA.....	21	ATTTTTAATTTCTTTCAATAA		1	0	1	0	0	0	0	0	0	0	0	0	0	0	0	0	0	0	6	0	0	0	0		0	0	0	6	0	0	0	0	0	0	0	0	0	0	0	0	0	0	0
dme-mir-ITS1_2_25_+	2	25	..ACATTTATTGAAGGAATTGATAT............................................	23	ACATTTATTGAAGGAATTGATAT		1	0	0	1	0	0	0	0	0	0	0	0	0	0	0	0	0	0	0	1	1	0	0		0	0	0	0	0	0	0	1	11	0	0	0	0	0	0	0	0	0	0
dme-mir-ITS1_0_24_+	0	24	ATACATTTATTGAAGGAATTGATA.............................................	24	ATACATTTATTGAAGGAATTGATA		0	0	0	0	4	2	1	4	0	0	0	0	0	0	0	0	0	0	0	0	0	0	0		0	0	0	0	2	0	0	0	0	0	0	0	0	0	0	0	0	0	0
dme-mir-ITS1_19_39_+	19	39	...................TGATATATGCCAGTAAAATG..............................	20	TGATATATGCCAGTAAAATG		0	0	0	0	0	0	0	0	0	0	1	0	0	0	0	0	2	0	0	0	0	0	0		0	0	0	1	8	0	0	0	1	0	0	0	0	0	0	0	0	0	0
dme-mir-ITS1_22_43_+	22	43	......................TATATGCCAGTAAAATGGTGT..........................	21	TATATGCCAGTAAAATGGTGT		0	0	0	1	0	0	0	0	0	0	0	0	0	0	0	0	0	0	0	0	0	0	0		0	0	0	3	0	0	0	0	0	0	0	0	0	0	0	10	0	0	0
dme-mir-ITS1_38_62_+	38	62	......................................GGTGTATTTTTAATTTCTTTCAAT.......	24	GGTGTATTTTTAATTTCTTTCAAT		0	0	0	0	0	0	1	0	0	0	0	0	0	0	1	0	0	0	1	0	0	0	0		0	0	0	0	0	0	0	3	0	0	0	0	0	0	0	0	0	0	0
dme-mir-ITS1_8_34_+	8	34	........ATTGAAGGAATTGATATATGCCAGTA...................................	26	ATTGAAGGAATTGATATATGCCAGTA		0	0	0	0	0	2	5	3	0	0	1	0	0	0	0	0	0	0	0	0	0	0	0		0	0	0	0	2	0	0	1	0	0	0	0	0	0	0	0	0	0	0
dme-mir-ITS1_11_37_+	11	37	...........GAAGGAATTGATATATGCCAGTAAAA................................	26	GAAGGAATTGATATATGCCAGTAAAA		0	0	1	0	1	2	2	0	0	0	0	0	0	0	0	0	0	0	0	0	0	0	0		0	0	0	0	0	0	0	0	0	0	0	0	0	0	0	0	0	0	0
dme-mir-ITS1_12_33_+	12	33	............AAGGAATTGATATATGCCAGT....................................	21	AAGGAATTGATATATGCCAGT		0	1	2	0	2	2	0	1	0	0	0	0	0	0	0	0	0	0	0	0	0	0	0		1	0	0	0	0	0	0	1	0	3	0	0	0	0	0	0	0	0	0
dme-mir-ITS1_42_62_+	42	62	..........................................TATTTTTAATTTCTTTCAAT.......	20	TATTTTTAATTTCTTTCAAT		0	0	0	0	0	0	0	0	0	0	0	0	0	0	0	0	0	0	4	1	2	0	0		0	0	0	4	1	0	0	0	0	0	0	0	0	0	0	0	2	0	0
dme-mir-ITS1_3_30_+	3	30	...CATTTATTGAAGGAATTGATATATGCC.......................................	27	CATTTATTGAAGGAATTGATATATGCC		0	0	0	0	0	1	0	1	0	0	0	0	0	0	0	0	0	0	0	0	0	0	2		5	1	0	0	0	0	0	0	0	0	0	0	0	0	0	0	0	0	0
dme-mir-ITS1_1_21_+	1	21	.TACATTTATTGAAGGAATTG................................................	20	TACATTTATTGAAGGAATTG		1	0	0	1	1	0	2	0	0	0	0	0	0	0	0	0	0	0	0	0	0	0	0		0	1	0	0	0	0	0	3	1	0	0	0	0	0	0	0	0	0	0
dme-mir-ITS1_12_30_+	12	30	............AAGGAATTGATATATGCC.......................................	18	AAGGAATTGATATATGCC		4	2	0	1	0	0	0	2	0	0	1	0	0	0	0	0	0	0	0	0	0	1	0		0	0	0	2	0	0	0	0	0	0	0	0	0	0	0	0	0	0	0
dme-mir-ITS1_12_38_+	12	38	............AAGGAATTGATATATGCCAGTAAAAT...............................	26	AAGGAATTGATATATGCCAGTAAAAT		0	0	0	0	1	2	0	10	0	0	0	0	0	0	0	0	0	0	0	0	0	0	0		0	0	0	0	0	0	0	0	0	0	0	0	0	0	0	0	0	0	0
dme-mir-ITS1_13_31_+	13	31	.............AGGAATTGATATATGCCA......................................	18	AGGAATTGATATATGCCA		10	0	2	0	1	0	0	0	0	0	0	0	0	0	0	0	0	0	0	1	0	0	0		0	0	0	0	0	0	0	0	0	0	0	0	0	0	0	0	0	0	0
dme-mir-ITS1_16_39_+	16	39	................AATTGATATATGCCAGTAAAATG..............................	23	AATTGATATATGCCAGTAAAATG		0	0	0	0	0	1	0	0	0	0	0	0	0	0	2	0	0	0	0	0	0	1	0		0	0	0	0	0	0	0	0	2	0	0	0	0	0	0	0	0	0	0
dme-mir-ITS1_26_44_+	26	44	..........................TGCCAGTAAAATGGTGTA.........................	18	TGCCAGTAAAATGGTGTA		0	0	0	0	0	0	0	0	0	0	0	0	0	0	0	0	0	0	0	0	0	0	0		0	0	0	0	0	0	0	0	3	0	0	0	0	0	0	0	0	0	0
dme-mir-ITS1_2_21_+	2	21	..ACATTTATTGAAGGAATTG................................................	19	ACATTTATTGAAGGAATTG		0	0	2	0	1	0	2	3	0	0	0	0	0	0	0	0	0	0	0	0	1	0	0		0	0	0	0	0	0	0	1	0	0	0	0	0	0	0	0	0	0	0
dme-mir-ITS1_11_32_+	11	32	...........GAAGGAATTGATATATGCCAG.....................................	21	GAAGGAATTGATATATGCCAG		0	0	0	1	0	0	0	0	0	0	0	1	0	0	0	0	0	0	0	0	0	0	0		0	0	0	0	0	0	0	2	0	0	0	0	0	0	0	0	0	0	0
dme-mir-ITS1_38_64_+	38	64	......................................GGTGTATTTTTAATTTCTTTCAATAA.....	26	GGTGTATTTTTAATTTCTTTCAATAA		1	0	0	0	0	0	0	0	0	0	0	0	0	0	0	0	0	0	0	4	2	0	0		0	0	0	0	0	0	0	1	3	0	0	0	0	0	0	0	0	0	0
dme-mir-ITS1_38_63_+	38	63	......................................GGTGTATTTTTAATTTCTTTCAATA......	25	GGTGTATTTTTAATTTCTTTCAATA		1	0	0	0	0	0	0	0	0	0	0	1	0	0	0	0	0	0	0	2	0	0	0		0	0	0	0	0	0	0	1	6	0	0	0	0	0	0	0	0	0	0
dme-mir-ITS1_0_26_+	0	26	ATACATTTATTGAAGGAATTGATATA...........................................	26	ATACATTTATTGAAGGAATTGATATA		0	0	0	0	1	4	3	1	0	0	0	0	0	0	0	0	0	0	0	0	0	1	0		0	0	0	0	0	0	0	0	0	0	0	0	0	0	0	0	0	0	0
dme-mir-ITS1_2_27_+	2	27	..ACATTTATTGAAGGAATTGATATAT..........................................	25	ACATTTATTGAAGGAATTGATATAT		0	0	0	0	0	1	0	1	0	0	0	0	0	0	1	0	0	0	0	0	0	0	1		0	1	0	0	1	0	0	0	0	0	0	0	0	0	0	0	0	0	0
dme-mir-ITS1_17_39_+	17	39	.................ATTGATATATGCCAGTAAAATG..............................	22	ATTGATATATGCCAGTAAAATG		0	0	0	0	2	0	0	0	0	0	1	1	0	0	0	0	0	1	0	0	0	0	0		0	0	0	0	0	0	0	1	1	0	0	0	0	0	0	0	0	0	0
dme-mir-ITS1_1_30_+	1	30	.TACATTTATTGAAGGAATTGATATATGCC.......................................	29	TACATTTATTGAAGGAATTGATATATGCC		0	0	0	0	0	0	0	0	0	0	0	0	0	0	0	0	0	0	0	0	0	0	0		0	0	0	0	0	0	0	0	0	0	0	0	0	0	0	0	0	0	0
dme-mir-ITS1_1_20_+	1	20	.TACATTTATTGAAGGAATT.................................................	19	TACATTTATTGAAGGAATT		0	0	0	0	0	0	0	2	0	0	0	1	0	0	0	0	0	0	0	0	4	1	0		0	0	0	0	0	0	0	1	0	0	0	0	0	0	0	0	0	0	0
dme-mir-ITS1_23_48_+	23	48	.......................ATATGCCAGTAAAATGGTGTATTTT.....................	25	ATATGCCAGTAAAATGGTGTATTTT		0	0	0	0	0	0	0	0	0	0	0	0	0	0	0	0	0	0	0	0	0	0	0		0	0	0	0	0	0	0	2	8	0	0	0	0	0	0	0	0	0	0
dme-mir-ITS1_25_45_+	25	45	.........................ATGCCAGTAAAATGGTGTAT........................	20	ATGCCAGTAAAATGGTGTAT		0	0	0	0	0	0	0	0	0	0	0	0	0	0	0	0	0	0	0	0	0	0	0		0	0	0	0	0	0	0	2	5	0	0	0	0	0	0	0	0	0	0
dme-mir-ITS1_26_52_+	26	52	..........................TGCCAGTAAAATGGTGTATTTTTAAT.................	26	TGCCAGTAAAATGGTGTATTTTTAAT		0	0	0	0	0	0	0	0	0	0	0	2	0	0	0	0	0	0	0	0	0	0	0		0	0	0	0	0	0	0	0	3	0	0	0	0	0	0	0	0	0	0
dme-mir-ITS1_29_53_+	29	53	.............................CAGTAAAATGGTGTATTTTTAATT................	24	CAGTAAAATGGTGTATTTTTAATT		0	0	0	0	0	0	0	0	0	0	0	0	0	0	0	0	0	0	0	0	0	0	0		0	0	0	0	0	1	0	1	0	0	0	0	0	0	0	0	0	0	0
dme-mir-ITS1_37_58_+	37	58	.....................................TGGTGTATTTTTAATTTCTTT...........	21	TGGTGTATTTTTAATTTCTTT		0	0	1	0	0	0	0	0	0	1	1	1	0	0	2	0	0	0	0	0	0	0	0		0	0	0	0	0	0	0	1	0	0	0	0	0	0	0	0	0	0	0
dme-mir-ITS1_37_56_+	37	56	.....................................TGGTGTATTTTTAATTTCT.............	19	TGGTGTATTTTTAATTTCT		0	0	0	0	0	0	0	0	0	0	0	0	0	0	0	0	0	0	0	0	0	0	0		0	0	0	0	0	1	0	0	2	0	0	0	0	0	0	0	0	0	0
dme-mir-ITS1_0_23_+	0	23	ATACATTTATTGAAGGAATTGAT..............................................	23	ATACATTTATTGAAGGAATTGAT		0	0	0	0	0	1	2	0	0	0	0	0	0	0	0	0	0	0	0	0	0	0	0		0	0	0	0	0	0	0	0	2	0	0	0	0	0	0	0	0	0	0
dme-mir-ITS1_0_19_+	0	19	ATACATTTATTGAAGGAAT..................................................	19	ATACATTTATTGAAGGAAT		0	0	0	0	1	0	1	0	0	0	0	0	0	0	0	0	0	0	0	0	0	1	0		0	0	0	0	0	0	0	0	4	0	0	0	0	0	0	0	0	0	0
dme-mir-ITS1_2_28_+	2	28	..ACATTTATTGAAGGAATTGATATATG.........................................	26	ACATTTATTGAAGGAATTGATATATG		0	0	0	0	1	2	1	2	0	0	0	0	0	0	0	0	0	0	0	0	0	0	0		0	1	1	0	0	0	0	0	0	0	0	0	0	0	0	0	0	0	0
dme-mir-ITS1_2_23_+	2	23	..ACATTTATTGAAGGAATTGAT..............................................	21	ACATTTATTGAAGGAATTGAT		1	0	0	0	0	3	0	0	0	0	0	0	0	0	0	0	0	0	1	0	0	0	0		0	0	0	0	0	0	0	1	0	0	0	0	0	0	0	0	0	0	0
dme-mir-ITS1_12_36_+	12	36	............AAGGAATTGATATATGCCAGTAAA.................................	24	AAGGAATTGATATATGCCAGTAAA		0	0	0	0	2	0	1	5	0	0	0	2	0	0	0	0	0	0	0	0	0	0	0		0	0	0	0	0	0	0	0	0	0	0	0	0	0	0	0	0	0	0
dme-mir-ITS1_18_39_+	18	39	..................TTGATATATGCCAGTAAAATG..............................	21	TTGATATATGCCAGTAAAATG		0	0	0	1	0	0	0	1	0	0	0	1	0	0	0	0	0	1	0	0	0	2	0		1	0	0	0	0	0	0	0	1	0	0	0	0	0	0	0	0	0	0
dme-mir-ITS1_30_51_+	30	51	..............................AGTAAAATGGTGTATTTTTAA..................	21	AGTAAAATGGTGTATTTTTAA		0	0	0	0	0	0	0	1	0	0	0	0	0	0	0	0	0	0	0	0	0	0	0		3	0	0	0	0	0	2	0	2	0	0	0	0	0	0	0	0	0	0
dme-mir-ITS1_33_59_+	33	59	.................................AAAATGGTGTATTTTTAATTTCTTTC..........	26	AAAATGGTGTATTTTTAATTTCTTTC		0	0	0	0	0	0	0	0	0	0	0	0	0	0	0	0	1	0	0	0	0	0	0		0	0	0	0	0	0	0	0	0	0	0	0	0	0	0	0	0	0	0
dme-mir-ITS1_37_65_+	37	65	.....................................TGGTGTATTTTTAATTTCTTTCAATAAA....	28	TGGTGTATTTTTAATTTCTTTCAATAAA		0	0	0	0	0	0	0	0	0	0	0	0	0	0	0	0	0	0	0	0	0	0	0		0	0	0	0	0	0	1	0	0	0	0	0	0	0	0	0	0	0	0
dme-mir-ITS1_38_65_+	38	65	......................................GGTGTATTTTTAATTTCTTTCAATAAA....	27	GGTGTATTTTTAATTTCTTTCAATAAA		1	0	0	0	0	0	0	0	0	0	0	0	0	0	0	0	0	0	0	3	1	0	0		1	0	0	0	3	0	0	0	0	0	0	0	0	0	0	0	0	0	0
dme-mir-ITS1_41_66_+	41	66	.........................................GTATTTTTAATTTCTTTCAATAAAA...	25	GTATTTTTAATTTCTTTCAATAAAA		0	0	0	0	0	0	1	0	0	0	0	1	0	0	1	0	0	0	1	0	0	0	0		0	0	0	2	1	0	0	0	0	0	0	0	0	0	0	0	0	0	0
dme-mir-ITS1_2_22_+	2	22	..ACATTTATTGAAGGAATTGA...............................................	20	ACATTTATTGAAGGAATTGA		0	0	0	0	1	1	1	0	0	0	0	0	0	0	0	0	0	0	0	0	0	0	0		0	1	0	0	0	0	0	2	0	0	0	0	0	0	0	0	0	0	0
dme-mir-ITS1_3_31_+	3	31	...CATTTATTGAAGGAATTGATATATGCCA......................................	28	CATTTATTGAAGGAATTGATATATGCCA		0	0	0	0	0	4	1	1	0	0	0	0	0	0	0	0	0	0	0	0	0	0	0		0	0	0	0	0	0	0	0	0	0	0	0	0	0	0	0	0	0	0
dme-mir-ITS1_4_33_+	4	33	....ATTTATTGAAGGAATTGATATATGCCAGT....................................	29	ATTTATTGAAGGAATTGATATATGCCAGT		1	0	0	0	0	4	0	0	0	0	0	0	0	0	0	0	0	0	0	0	1	0	0		0	0	0	0	1	0	0	0	0	0	0	0	0	0	0	0	0	0	0
dme-mir-ITS1_7_36_+	7	36	.......TATTGAAGGAATTGATATATGCCAGTAAA.................................	29	TATTGAAGGAATTGATATATGCCAGTAAA		1	0	0	0	0	0	0	0	0	0	0	0	0	0	0	0	0	0	0	0	0	0	0		0	0	0	0	5	0	0	0	0	0	0	0	0	0	0	0	0	0	0
dme-mir-ITS1_32_54_+	32	54	................................TAAAATGGTGTATTTTTAATTT...............	22	TAAAATGGTGTATTTTTAATTT		0	0	0	1	0	0	0	0	0	0	0	0	0	0	0	0	0	0	0	0	0	0	0		0	0	0	0	0	0	0	0	0	0	0	0	0	0	0	0	0	0	0
dme-mir-ITS1_33_57_+	33	57	.................................AAAATGGTGTATTTTTAATTTCTT............	24	AAAATGGTGTATTTTTAATTTCTT		0	0	0	0	0	0	0	0	0	0	0	1	0	0	0	0	0	0	0	0	0	0	0		0	0	0	0	0	0	0	0	2	0	0	0	0	0	0	0	0	0	0
dme-mir-ITS1_34_59_+	34	59	..................................AAATGGTGTATTTTTAATTTCTTTC..........	25	AAATGGTGTATTTTTAATTTCTTTC		0	0	0	0	0	0	0	0	0	1	0	0	0	0	0	0	0	0	0	0	0	0	0		0	0	0	0	0	0	0	0	1	0	0	0	0	0	0	0	0	0	0
dme-mir-ITS1_39_64_+	39	64	.......................................GTGTATTTTTAATTTCTTTCAATAA.....	25	GTGTATTTTTAATTTCTTTCAATAA		5	0	1	0	0	0	0	0	0	0	0	0	0	0	0	0	0	0	1	1	2	0	0		0	0	0	0	0	0	0	0	0	0	0	0	0	0	0	0	0	0	0
dme-mir-ITS1_43_66_+	43	66	...........................................ATTTTTAATTTCTTTCAATAAAA...	23	ATTTTTAATTTCTTTCAATAAAA		2	1	0	0	0	0	0	0	0	0	0	0	0	0	0	0	0	0	0	0	0	0	0		0	0	0	4	0	0	0	0	0	0	0	0	0	0	0	0	0	0	0
dme-mir-ITS1_3_25_+	3	25	...CATTTATTGAAGGAATTGATAT............................................	22	CATTTATTGAAGGAATTGATAT		0	0	1	0	0	0	0	0	0	0	0	0	0	0	0	0	0	0	0	0	0	0	0		0	0	0	0	0	0	0	0	0	0	0	0	0	0	0	0	0	0	0
dme-mir-ITS1_13_33_+	13	33	.............AGGAATTGATATATGCCAGT....................................	20	AGGAATTGATATATGCCAGT		1	0	0	0	0	0	0	0	0	0	0	0	0	0	0	0	0	0	0	0	0	0	0		0	0	0	0	0	0	0	0	0	0	0	0	0	0	0	0	0	0	0
dme-mir-ITS1_14_40_+	14	40	..............GGAATTGATATATGCCAGTAAAATGG.............................	26	GGAATTGATATATGCCAGTAAAATGG		0	0	0	0	0	1	0	0	0	0	0	0	0	0	0	0	0	0	0	0	0	0	0		0	0	0	0	0	0	0	0	0	0	0	0	0	0	0	0	0	0	0
dme-mir-ITS1_20_39_+	20	39	....................GATATATGCCAGTAAAATG..............................	19	GATATATGCCAGTAAAATG		0	0	0	0	0	0	0	0	0	0	0	3	0	0	0	0	0	4	1	0	0	0	0		0	0	0	0	0	0	0	0	0	0	0	0	0	0	0	0	0	0	0
dme-mir-ITS1_24_44_+	24	44	........................TATGCCAGTAAAATGGTGTA.........................	20	TATGCCAGTAAAATGGTGTA		0	0	0	0	0	0	0	0	0	0	2	0	0	0	0	0	0	0	0	0	0	0	0		0	0	0	0	0	0	1	2	0	0	0	0	0	0	0	0	0	0	0
dme-mir-ITS1_31_52_+	31	52	...............................GTAAAATGGTGTATTTTTAAT.................	21	GTAAAATGGTGTATTTTTAAT		0	0	0	0	0	0	0	0	0	0	0	2	0	0	0	0	0	1	0	0	0	0	0		2	0	0	0	0	0	0	0	0	0	0	0	0	0	0	0	0	0	0
dme-mir-ITS1_39_62_+	39	62	.......................................GTGTATTTTTAATTTCTTTCAAT.......	23	GTGTATTTTTAATTTCTTTCAAT		0	0	0	0	1	0	0	2	0	0	0	1	0	0	1	0	0	0	2	0	0	0	0		0	0	0	0	0	0	0	0	0	0	0	0	0	0	0	0	0	0	0
dme-mir-ITS1_2_20_+	2	20	..ACATTTATTGAAGGAATT.................................................	18	ACATTTATTGAAGGAATT		0	0	0	0	0	0	0	0	0	0	0	0	0	0	0	0	0	0	0	0	0	0	0		0	0	0	0	0	0	0	0	0	0	0	0	0	0	0	0	0	0	0
dme-mir-ITS1_3_27_+	3	27	...CATTTATTGAAGGAATTGATATAT..........................................	24	CATTTATTGAAGGAATTGATATAT		0	0	0	1	0	0	0	0	0	0	1	0	0	0	0	0	0	0	0	0	0	0	4		0	0	0	0	0	0	0	0	0	0	0	0	0	0	0	0	1	0	0
dme-mir-ITS1_3_26_+	3	26	...CATTTATTGAAGGAATTGATATA...........................................	23	CATTTATTGAAGGAATTGATATA		0	0	0	0	2	2	0	0	0	0	0	0	0	0	0	0	0	0	0	0	0	1	0		0	0	0	0	0	0	0	0	0	0	0	0	0	0	0	0	0	0	0
dme-mir-ITS1_7_37_+	7	37	.......TATTGAAGGAATTGATATATGCCAGTAAAA................................	30	TATTGAAGGAATTGATATATGCCAGTAAAA		0	0	0	0	0	0	0	0	0	0	0	0	0	0	0	0	0	0	0	0	0	0	0		0	0	0	0	0	0	0	0	0	0	0	0	0	0	0	0	0	0	0
dme-mir-ITS1_11_36_+	11	36	...........GAAGGAATTGATATATGCCAGTAAA.................................	25	GAAGGAATTGATATATGCCAGTAAA		0	0	0	0	0	0	0	2	0	0	0	0	0	0	0	0	1	0	0	0	0	0	0		0	0	0	0	0	0	0	0	0	0	0	0	0	0	0	0	0	0	0
dme-mir-ITS1_13_37_+	13	37	.............AGGAATTGATATATGCCAGTAAAA................................	24	AGGAATTGATATATGCCAGTAAAA		0	0	0	0	0	0	0	0	0	0	0	0	0	0	0	0	0	0	0	0	0	0	0		0	0	0	0	0	0	0	0	0	0	0	0	0	0	0	0	0	0	0
dme-mir-ITS1_19_37_+	19	37	...................TGATATATGCCAGTAAAA................................	18	TGATATATGCCAGTAAAA		0	0	0	0	0	0	0	0	0	0	0	0	0	0	0	0	0	0	0	0	0	0	0		0	0	0	0	0	0	0	1	0	0	0	0	0	0	0	0	0	0	0
dme-mir-ITS1_32_60_+	32	60	................................TAAAATGGTGTATTTTTAATTTCTTTCA.........	28	TAAAATGGTGTATTTTTAATTTCTTTCA		0	0	0	0	0	0	0	0	0	0	0	0	0	0	0	0	0	0	0	0	0	0	0		0	0	0	0	0	0	0	0	2	0	0	0	0	0	0	0	0	0	0
dme-mir-ITS1_33_61_+	33	61	.................................AAAATGGTGTATTTTTAATTTCTTTCAA........	28	AAAATGGTGTATTTTTAATTTCTTTCAA		0	0	0	0	0	0	0	0	0	0	0	0	0	0	0	0	0	0	0	0	0	0	0		0	0	0	0	0	0	0	0	0	0	0	0	0	0	0	0	0	0	0
dme-mir-ITS1_38_61_+	38	61	......................................GGTGTATTTTTAATTTCTTTCAA........	23	GGTGTATTTTTAATTTCTTTCAA		0	0	0	0	0	0	0	0	0	0	0	0	0	0	0	0	0	0	0	0	0	0	0		0	0	0	0	0	0	0	0	0	0	0	0	0	0	0	0	0	0	0
dme-mir-ITS1_45_63_+	45	63	.............................................TTTTAATTTCTTTCAATA......	18	TTTTAATTTCTTTCAATA		0	0	1	0	0	1	0	0	0	0	0	0	0	0	0	0	0	0	0	0	0	0	0		0	0	0	4	0	0	0	0	0	0	0	0	0	0	0	0	0	0	0
dme-mir-ITS1_3_21_+	3	21	...CATTTATTGAAGGAATTG................................................	18	CATTTATTGAAGGAATTG		0	0	0	0	0	0	0	0	0	0	0	0	0	0	0	0	0	0	0	0	0	1	0		0	0	0	0	0	0	0	2	0	0	0	0	0	0	0	0	0	0	0
dme-mir-ITS1_11_35_+	11	35	...........GAAGGAATTGATATATGCCAGTAA..................................	24	GAAGGAATTGATATATGCCAGTAA		0	0	0	0	0	0	0	0	0	0	0	0	0	0	0	0	0	0	0	0	0	0	0		0	0	0	0	0	0	0	0	0	0	0	0	0	0	0	0	0	0	0
dme-mir-ITS1_11_34_+	11	34	...........GAAGGAATTGATATATGCCAGTA...................................	23	GAAGGAATTGATATATGCCAGTA		0	0	0	0	0	0	0	1	0	0	0	0	0	0	0	0	0	0	0	0	0	0	0		0	0	0	0	2	0	0	1	0	0	0	0	0	0	0	0	0	0	0
dme-mir-ITS1_12_39_+	12	39	............AAGGAATTGATATATGCCAGTAAAATG..............................	27	AAGGAATTGATATATGCCAGTAAAATG		2	0	0	0	0	0	0	4	0	0	0	0	0	0	0	0	0	0	0	0	0	0	0		0	0	0	0	0	0	0	0	0	0	0	0	0	0	0	0	0	0	0
dme-mir-ITS1_14_38_+	14	38	..............GGAATTGATATATGCCAGTAAAAT...............................	24	GGAATTGATATATGCCAGTAAAAT		0	0	0	0	0	0	0	0	0	0	0	0	0	0	2	0	0	0	0	0	0	0	0		0	0	0	0	0	0	0	0	4	0	0	0	0	0	0	0	0	0	0
dme-mir-ITS1_17_38_+	17	38	.................ATTGATATATGCCAGTAAAAT...............................	21	ATTGATATATGCCAGTAAAAT		0	0	0	0	0	0	0	0	0	0	0	0	0	0	1	0	0	0	0	0	0	0	0		1	0	0	0	0	0	0	1	0	0	0	0	0	0	0	0	0	0	0
dme-mir-ITS1_26_51_+	26	51	..........................TGCCAGTAAAATGGTGTATTTTTAA..................	25	TGCCAGTAAAATGGTGTATTTTTAA		0	0	0	0	0	0	0	0	0	0	0	0	0	0	0	0	0	0	0	0	0	0	0		0	0	0	0	0	0	0	0	0	0	0	0	0	0	0	0	0	0	0
dme-mir-ITS1_26_50_+	26	50	..........................TGCCAGTAAAATGGTGTATTTTTA...................	24	TGCCAGTAAAATGGTGTATTTTTA		0	0	0	0	0	0	0	0	0	0	0	0	0	0	0	0	0	0	0	0	0	0	0		0	0	0	0	0	0	0	0	0	0	0	0	0	0	0	0	0	0	0
dme-mir-ITS1_26_46_+	26	46	..........................TGCCAGTAAAATGGTGTATT.......................	20	TGCCAGTAAAATGGTGTATT		0	0	0	0	0	0	0	0	0	0	0	0	0	0	0	0	0	0	0	0	0	0	0		0	0	0	0	0	0	0	0	1	0	0	0	0	0	0	0	0	0	0
dme-mir-ITS1_30_52_+	30	52	..............................AGTAAAATGGTGTATTTTTAAT.................	22	AGTAAAATGGTGTATTTTTAAT		0	0	0	0	0	0	0	0	0	0	0	0	0	0	0	0	0	0	0	0	0	0	0		5	0	0	0	0	0	0	0	0	0	0	0	0	0	0	0	0	0	0
dme-mir-ITS1_30_49_+	30	49	..............................AGTAAAATGGTGTATTTTT....................	19	AGTAAAATGGTGTATTTTT		0	0	0	0	0	0	0	0	0	0	0	1	0	0	0	0	0	0	0	0	0	0	0		0	0	0	0	1	0	0	0	0	0	0	0	0	0	0	0	0	0	0
dme-mir-ITS1_31_55_+	31	55	...............................GTAAAATGGTGTATTTTTAATTTC..............	24	GTAAAATGGTGTATTTTTAATTTC		0	0	0	0	0	0	0	0	0	0	0	0	0	0	0	0	0	0	0	0	0	0	0		1	0	0	0	0	0	2	0	0	0	0	0	0	0	0	0	0	0	0
dme-mir-ITS1_31_51_+	31	51	...............................GTAAAATGGTGTATTTTTAA..................	20	GTAAAATGGTGTATTTTTAA		0	0	0	0	0	0	0	0	0	0	2	0	0	0	0	0	0	1	0	0	0	0	0		1	0	0	0	0	0	0	1	0	0	0	0	0	0	0	0	0	0	0
dme-mir-ITS1_35_60_+	35	60	...................................AATGGTGTATTTTTAATTTCTTTCA.........	25	AATGGTGTATTTTTAATTTCTTTCA		0	0	0	0	0	0	0	0	0	0	0	0	0	0	0	0	0	0	0	0	0	0	0		0	0	0	0	0	1	0	0	0	0	0	0	0	0	0	0	0	0	0
dme-mir-ITS1_40_59_+	40	59	........................................TGTATTTTTAATTTCTTTC..........	19	TGTATTTTTAATTTCTTTC		0	0	0	0	0	0	0	0	0	0	0	0	0	0	0	0	0	0	1	0	0	0	0		1	0	0	1	0	0	0	0	0	0	0	0	0	0	0	0	0	0	0
dme-mir-ITS1_45_65_+	45	65	.............................................TTTTAATTTCTTTCAATAAA....	20	TTTTAATTTCTTTCAATAAA		0	0	1	2	0	0	0	0	0	0	0	0	0	0	0	0	0	0	2	0	0	0	0		0	0	0	1	0	0	0	0	0	0	0	0	0	0	0	0	0	0	0
dme-mir-ITS1_0_25_+	0	25	ATACATTTATTGAAGGAATTGATAT............................................	25	ATACATTTATTGAAGGAATTGATAT		0	0	0	0	0	0	0	0	0	0	0	0	0	0	0	0	0	0	0	0	0	0	0		0	0	0	0	0	0	0	0	0	0	0	0	1	0	0	0	0	0	0
dme-mir-ITS1_0_20_+	0	20	ATACATTTATTGAAGGAATT.................................................	20	ATACATTTATTGAAGGAATT		0	0	0	0	0	0	0	0	0	0	0	0	0	0	0	0	0	0	0	0	0	0	0		0	0	0	0	0	0	0	0	0	0	0	0	0	0	0	0	0	0	0
dme-mir-ITS1_2_24_+	2	24	..ACATTTATTGAAGGAATTGATA.............................................	22	ACATTTATTGAAGGAATTGATA		0	0	0	1	0	1	0	1	0	0	0	0	0	0	0	0	0	0	0	0	0	2	0		0	0	0	0	0	0	0	0	0	0	0	0	0	0	0	0	0	0	0
dme-mir-ITS1_8_35_+	8	35	........ATTGAAGGAATTGATATATGCCAGTAA..................................	27	ATTGAAGGAATTGATATATGCCAGTAA		0	0	0	0	0	2	1	3	0	0	0	0	0	0	0	0	0	0	0	0	0	0	0		0	0	0	0	0	0	0	0	0	0	0	0	0	0	0	0	0	0	0
dme-mir-ITS1_9_38_+	9	38	.........TTGAAGGAATTGATATATGCCAGTAAAAT...............................	29	TTGAAGGAATTGATATATGCCAGTAAAAT		0	0	0	0	0	1	1	0	0	0	0	0	0	0	0	0	0	0	0	0	1	0	0		0	0	0	0	2	0	0	0	0	0	0	0	0	0	0	0	0	0	0
dme-mir-ITS1_18_44_+	18	44	..................TTGATATATGCCAGTAAAATGGTGTA.........................	26	TTGATATATGCCAGTAAAATGGTGTA		0	0	0	0	0	0	0	0	0	0	0	0	0	0	0	0	0	0	0	0	0	0	0		0	0	0	0	3	0	0	0	0	0	0	0	0	0	0	0	0	0	0
dme-mir-ITS1_23_50_+	23	50	.......................ATATGCCAGTAAAATGGTGTATTTTTA...................	27	ATATGCCAGTAAAATGGTGTATTTTTA		0	0	0	0	0	0	0	0	0	0	0	0	0	0	0	0	0	0	0	0	0	0	0		0	0	0	0	0	0	0	0	0	0	0	0	0	0	0	0	0	0	0
dme-mir-ITS1_23_47_+	23	47	.......................ATATGCCAGTAAAATGGTGTATTT......................	24	ATATGCCAGTAAAATGGTGTATTT		0	0	0	0	0	0	0	0	0	0	0	0	0	0	0	0	0	0	0	0	0	0	0		0	0	0	0	0	0	0	0	2	0	0	0	0	0	0	0	0	0	0
dme-mir-ITS1_30_48_+	30	48	..............................AGTAAAATGGTGTATTTT.....................	18	AGTAAAATGGTGTATTTT		0	0	0	0	0	0	0	0	0	0	0	0	0	0	0	0	0	0	0	0	0	0	0		3	0	0	0	3	0	0	0	0	0	0	0	0	0	0	0	0	0	0
dme-mir-ITS1_34_60_+	34	60	..................................AAATGGTGTATTTTTAATTTCTTTCA.........	26	AAATGGTGTATTTTTAATTTCTTTCA		0	0	0	0	0	0	0	0	0	0	0	0	0	0	0	0	0	0	0	0	0	0	0		0	0	0	0	0	0	0	0	0	0	0	0	0	0	0	0	0	0	0
dme-mir-ITS1_34_58_+	34	58	..................................AAATGGTGTATTTTTAATTTCTTT...........	24	AAATGGTGTATTTTTAATTTCTTT		0	0	0	0	0	0	0	0	0	0	0	0	0	0	0	0	0	0	0	0	0	0	0		0	0	0	0	0	0	0	0	0	0	0	0	0	0	0	0	0	0	0
dme-mir-ITS1_36_61_+	36	61	....................................ATGGTGTATTTTTAATTTCTTTCAA........	25	ATGGTGTATTTTTAATTTCTTTCAA		0	0	0	0	0	0	0	0	0	0	0	1	0	0	0	0	0	0	0	0	0	0	0		0	0	0	0	0	0	0	0	3	0	0	0	0	0	0	0	0	0	0
dme-mir-ITS1_37_57_+	37	57	.....................................TGGTGTATTTTTAATTTCTT............	20	TGGTGTATTTTTAATTTCTT		0	0	0	0	0	0	0	0	0	0	1	0	0	0	0	0	0	0	0	0	0	0	0		0	0	0	0	1	0	0	0	0	0	0	0	0	0	0	0	0	0	0
dme-mir-ITS1_39_66_+	39	66	.......................................GTGTATTTTTAATTTCTTTCAATAAAA...	27	GTGTATTTTTAATTTCTTTCAATAAAA		2	0	0	0	0	0	0	0	0	0	0	0	0	0	0	0	0	0	0	3	1	0	0		0	0	0	0	0	0	0	0	0	0	0	0	0	0	0	0	0	0	0
dme-mir-ITS1_41_67_+	41	67	.........................................GTATTTTTAATTTCTTTCAATAAAAA..	26	GTATTTTTAATTTCTTTCAATAAAAA		0	0	0	0	0	0	1	0	0	2	0	0	0	0	0	0	0	0	0	0	0	0	0		0	0	0	2	0	0	0	0	0	0	0	0	0	0	0	0	0	0	0
dme-mir-ITS1_41_59_+	41	59	.........................................GTATTTTTAATTTCTTTC..........	18	GTATTTTTAATTTCTTTC		0	0	0	0	0	0	0	0	0	0	0	1	0	0	2	0	0	0	0	0	0	0	0		0	0	0	0	0	0	0	0	0	0	0	0	0	0	0	0	0	0	0
dme-mir-ITS1_3_33_+	3	33	...CATTTATTGAAGGAATTGATATATGCCAGT....................................	30	CATTTATTGAAGGAATTGATATATGCCAGT		0	0	0	0	0	0	0	0	0	0	0	0	0	0	0	0	0	0	0	0	0	0	0		0	0	0	0	0	0	0	0	0	0	0	0	0	0	0	0	0	0	0
dme-mir-ITS1_3_22_+	3	22	...CATTTATTGAAGGAATTGA...............................................	19	CATTTATTGAAGGAATTGA		0	0	0	0	0	0	0	0	0	0	0	1	0	0	1	0	0	0	0	0	0	0	0		0	0	0	0	0	0	0	0	0	0	0	0	0	0	0	0	0	0	0
dme-mir-ITS1_5_34_+	5	34	.....TTTATTGAAGGAATTGATATATGCCAGTA...................................	29	TTTATTGAAGGAATTGATATATGCCAGTA		0	0	0	0	0	0	0	0	0	0	0	0	0	0	0	0	0	0	0	0	0	0	0		0	0	0	0	1	0	0	0	0	0	0	0	0	0	0	0	0	0	0
dme-mir-ITS1_12_40_+	12	40	............AAGGAATTGATATATGCCAGTAAAATGG.............................	28	AAGGAATTGATATATGCCAGTAAAATGG		0	0	0	0	0	2	0	2	0	0	0	0	0	0	0	0	0	0	0	0	0	0	0		0	0	0	0	0	0	0	0	0	0	0	0	0	0	0	0	0	0	0
dme-mir-ITS1_15_38_+	15	38	...............GAATTGATATATGCCAGTAAAAT...............................	23	GAATTGATATATGCCAGTAAAAT		0	0	0	0	0	0	0	0	0	0	0	0	0	0	0	0	0	0	0	0	0	0	0		0	0	0	0	0	0	0	0	4	0	0	0	0	0	0	0	0	0	0
dme-mir-ITS1_17_35_+	17	35	.................ATTGATATATGCCAGTAA..................................	18	ATTGATATATGCCAGTAA		0	0	0	0	0	0	0	0	0	0	0	0	0	0	0	0	0	0	0	0	0	0	0		0	0	0	0	0	0	0	2	2	0	0	0	0	0	0	0	0	0	0
dme-mir-ITS1_20_38_+	20	38	....................GATATATGCCAGTAAAAT...............................	18	GATATATGCCAGTAAAAT		0	0	0	0	0	0	0	0	0	0	1	1	0	0	0	0	0	2	0	0	0	0	0		0	0	0	0	0	0	0	1	0	0	0	0	0	0	0	0	0	0	0
dme-mir-ITS1_24_47_+	24	47	........................TATGCCAGTAAAATGGTGTATTT......................	23	TATGCCAGTAAAATGGTGTATTT		0	0	0	0	0	0	0	0	0	0	0	0	0	0	0	0	0	0	0	0	0	0	0		0	0	0	0	0	0	0	1	0	0	0	0	0	0	0	0	0	0	0
dme-mir-ITS1_24_46_+	24	46	........................TATGCCAGTAAAATGGTGTATT.......................	22	TATGCCAGTAAAATGGTGTATT		0	0	0	0	0	0	0	0	0	0	0	0	0	0	1	0	0	0	0	0	0	0	0		0	0	0	0	0	0	0	0	4	0	0	0	0	0	0	0	0	0	0
dme-mir-ITS1_25_44_+	25	44	.........................ATGCCAGTAAAATGGTGTA.........................	19	ATGCCAGTAAAATGGTGTA		0	0	0	0	0	0	0	0	0	0	0	0	0	0	0	0	0	0	0	0	0	0	0		0	0	0	0	0	0	0	1	0	0	0	0	0	0	0	0	0	0	0
dme-mir-ITS1_28_48_+	28	48	............................CCAGTAAAATGGTGTATTTT.....................	20	CCAGTAAAATGGTGTATTTT		0	0	0	0	0	0	0	0	0	0	0	0	0	0	0	0	0	0	0	0	0	0	0		0	0	0	0	0	0	0	0	0	0	0	0	0	0	0	0	0	0	0
dme-mir-ITS1_29_49_+	29	49	.............................CAGTAAAATGGTGTATTTTT....................	20	CAGTAAAATGGTGTATTTTT		0	0	0	0	0	0	0	0	0	0	0	0	0	0	0	0	0	0	0	0	0	0	0		1	0	0	0	0	0	0	0	0	0	0	0	0	0	0	0	0	0	0
dme-mir-ITS1_30_55_+	30	55	..............................AGTAAAATGGTGTATTTTTAATTTC..............	25	AGTAAAATGGTGTATTTTTAATTTC		0	0	0	0	0	0	0	0	0	0	0	1	0	0	0	0	0	0	0	0	0	0	0		0	0	0	0	0	0	0	0	2	0	0	0	0	0	0	0	0	0	0
dme-mir-ITS1_30_50_+	30	50	..............................AGTAAAATGGTGTATTTTTA...................	20	AGTAAAATGGTGTATTTTTA		0	0	0	0	0	0	0	0	0	0	0	0	0	0	0	0	0	0	0	0	0	0	0		1	0	0	0	0	0	0	0	0	0	0	0	0	0	0	0	0	0	0
dme-mir-ITS1_33_58_+	33	58	.................................AAAATGGTGTATTTTTAATTTCTTT...........	25	AAAATGGTGTATTTTTAATTTCTTT		0	0	0	0	0	0	0	0	0	0	0	0	0	0	0	0	0	0	0	0	0	0	0		0	0	0	0	0	0	0	0	0	0	0	0	0	0	0	0	0	0	0
dme-mir-ITS1_36_63_+	36	63	....................................ATGGTGTATTTTTAATTTCTTTCAATA......	27	ATGGTGTATTTTTAATTTCTTTCAATA		0	0	0	1	0	0	0	0	0	0	0	0	0	0	0	0	0	0	0	0	0	0	0		0	0	0	0	0	0	0	0	0	0	0	0	0	0	0	0	0	0	0
dme-mir-ITS1_38_66_+	38	66	......................................GGTGTATTTTTAATTTCTTTCAATAAAA...	28	GGTGTATTTTTAATTTCTTTCAATAAAA		0	0	0	0	0	0	0	0	0	0	0	0	0	0	0	0	0	0	0	2	2	0	0		1	0	0	0	0	0	0	0	0	0	0	0	0	0	0	0	0	0	0
dme-mir-ITS1_38_56_+	38	56	......................................GGTGTATTTTTAATTTCT.............	18	GGTGTATTTTTAATTTCT		0	0	0	0	0	0	0	0	0	0	1	0	0	0	0	0	0	0	0	0	0	0	0		0	0	0	0	0	0	0	1	0	0	0	0	0	0	0	0	0	0	0
dme-mir-ITS1_3_23_+	3	23	...CATTTATTGAAGGAATTGAT..............................................	20	CATTTATTGAAGGAATTGAT		0	0	0	0	0	0	0	0	0	0	1	0	0	0	0	0	0	0	0	0	0	1	0		0	0	0	0	0	1	0	0	0	0	0	0	0	0	0	0	0	0	0
dme-mir-ITS1_6_35_+	6	35	......TTATTGAAGGAATTGATATATGCCAGTAA..................................	29	TTATTGAAGGAATTGATATATGCCAGTAA		0	0	0	0	0	0	0	0	0	0	0	0	0	0	0	0	0	0	0	1	1	0	0		0	0	0	0	0	0	0	0	0	0	0	0	0	0	0	0	0	0	0
dme-mir-ITS1_8_38_+	8	38	........ATTGAAGGAATTGATATATGCCAGTAAAAT...............................	30	ATTGAAGGAATTGATATATGCCAGTAAAAT		0	0	0	0	0	0	0	0	0	0	0	0	0	0	0	0	0	0	0	3	0	0	0		0	0	0	0	0	0	0	0	0	0	0	0	0	0	0	0	0	0	0
dme-mir-ITS1_13_39_+	13	39	.............AGGAATTGATATATGCCAGTAAAATG..............................	26	AGGAATTGATATATGCCAGTAAAATG		0	0	0	0	0	0	0	1	0	0	0	0	0	0	0	0	0	0	0	1	0	0	0		0	0	0	0	0	0	0	0	0	0	0	0	0	0	0	0	0	0	0
dme-mir-ITS1_14_35_+	14	35	..............GGAATTGATATATGCCAGTAA..................................	21	GGAATTGATATATGCCAGTAA		0	0	0	0	0	0	0	0	0	0	0	0	0	0	0	0	0	1	0	0	0	0	0		0	0	0	0	0	0	0	2	0	0	0	0	0	0	0	0	0	0	0
dme-mir-ITS1_14_34_+	14	34	..............GGAATTGATATATGCCAGTA...................................	20	GGAATTGATATATGCCAGTA		0	0	0	0	0	0	0	0	0	0	0	0	0	0	0	0	0	0	0	0	0	0	0		0	0	0	0	0	0	0	0	2	0	0	0	0	0	0	0	0	0	0
dme-mir-ITS1_18_43_+	18	43	..................TTGATATATGCCAGTAAAATGGTGT..........................	25	TTGATATATGCCAGTAAAATGGTGT		0	0	0	0	0	0	0	1	0	0	0	0	0	0	0	0	0	0	0	0	0	0	0		0	0	0	0	0	0	0	0	0	0	0	0	0	0	0	0	0	0	0
dme-mir-ITS1_22_44_+	22	44	......................TATATGCCAGTAAAATGGTGTA.........................	22	TATATGCCAGTAAAATGGTGTA		0	0	0	0	0	0	0	0	0	0	0	0	0	0	1	0	0	0	0	0	0	0	0		0	0	0	0	0	0	0	0	0	0	0	0	0	0	0	0	0	0	0
dme-mir-ITS1_24_51_+	24	51	........................TATGCCAGTAAAATGGTGTATTTTTAA..................	27	TATGCCAGTAAAATGGTGTATTTTTAA		0	0	0	0	0	0	0	0	0	0	0	0	0	0	0	0	0	0	0	0	0	0	0		0	0	0	0	0	0	0	0	0	0	0	0	0	0	0	0	0	0	0
dme-mir-ITS1_24_48_+	24	48	........................TATGCCAGTAAAATGGTGTATTTT.....................	24	TATGCCAGTAAAATGGTGTATTTT		0	0	0	0	0	0	0	0	0	0	0	0	0	0	0	0	0	0	0	0	0	0	0		0	0	0	0	0	0	0	1	0	0	0	0	0	0	0	0	0	0	0
dme-mir-ITS1_24_45_+	24	45	........................TATGCCAGTAAAATGGTGTAT........................	21	TATGCCAGTAAAATGGTGTAT		0	0	0	0	0	0	0	0	0	0	0	0	0	0	0	0	0	0	0	0	0	0	0		0	0	0	0	0	0	0	0	4	0	0	0	0	0	0	0	0	0	0
dme-mir-ITS1_26_48_+	26	48	..........................TGCCAGTAAAATGGTGTATTTT.....................	22	TGCCAGTAAAATGGTGTATTTT		0	0	0	0	0	0	0	0	0	0	0	0	0	0	0	0	0	0	0	0	0	0	0		0	0	0	0	0	0	0	0	0	0	0	0	0	0	0	0	0	0	0
dme-mir-ITS1_27_48_+	27	48	...........................GCCAGTAAAATGGTGTATTTT.....................	21	GCCAGTAAAATGGTGTATTTT		0	0	0	0	0	0	0	0	0	0	0	0	0	0	0	0	0	0	0	0	0	0	0		0	0	0	0	0	0	0	0	0	0	0	0	0	0	0	0	0	0	0
dme-mir-ITS1_27_45_+	27	45	...........................GCCAGTAAAATGGTGTAT........................	18	GCCAGTAAAATGGTGTAT		0	0	0	0	0	0	0	0	0	0	0	1	0	0	0	0	0	0	0	0	0	0	0		0	0	0	0	0	0	0	0	0	0	0	0	0	0	0	0	0	0	0
dme-mir-ITS1_29_52_+	29	52	.............................CAGTAAAATGGTGTATTTTTAAT.................	23	CAGTAAAATGGTGTATTTTTAAT		0	0	0	0	0	0	0	0	0	0	1	0	0	0	0	0	0	0	0	0	0	0	0		0	1	0	0	0	0	0	0	0	0	0	0	0	0	0	0	0	0	0
dme-mir-ITS1_29_51_+	29	51	.............................CAGTAAAATGGTGTATTTTTAA..................	22	CAGTAAAATGGTGTATTTTTAA		0	0	0	0	0	0	0	0	0	0	1	0	0	0	1	0	0	0	0	0	0	0	0		1	0	0	0	0	0	0	0	0	0	0	0	0	0	0	0	0	0	0
dme-mir-ITS1_31_54_+	31	54	...............................GTAAAATGGTGTATTTTTAATTT...............	23	GTAAAATGGTGTATTTTTAATTT		0	0	0	0	0	0	0	0	0	0	0	0	0	0	0	0	0	0	0	0	0	0	0		0	0	0	0	0	0	0	0	0	0	0	0	0	0	0	0	0	0	0
dme-mir-ITS1_31_53_+	31	53	...............................GTAAAATGGTGTATTTTTAATT................	22	GTAAAATGGTGTATTTTTAATT		0	0	0	0	0	0	0	0	0	0	0	0	0	0	0	0	0	0	0	0	0	0	0		0	0	0	0	0	0	0	0	0	0	0	0	0	0	0	0	0	0	0
dme-mir-ITS1_32_62_+	32	62	................................TAAAATGGTGTATTTTTAATTTCTTTCAAT.......	30	TAAAATGGTGTATTTTTAATTTCTTTCAAT		0	0	0	0	0	0	0	0	0	0	0	0	0	0	0	0	0	0	0	0	0	0	0		0	0	0	0	0	0	0	0	0	0	0	0	0	0	0	0	0	0	0
dme-mir-ITS1_32_61_+	32	61	................................TAAAATGGTGTATTTTTAATTTCTTTCAA........	29	TAAAATGGTGTATTTTTAATTTCTTTCAA		0	0	0	0	0	0	0	0	0	0	0	0	0	0	0	0	0	0	0	0	0	0	0		0	0	0	0	0	0	0	0	0	0	0	0	0	0	0	0	0	0	0
dme-mir-ITS1_32_50_+	32	50	................................TAAAATGGTGTATTTTTA...................	18	TAAAATGGTGTATTTTTA		0	0	0	0	0	0	0	0	0	0	0	0	0	0	1	0	0	0	0	0	0	0	0		0	0	0	0	0	0	0	1	0	0	0	0	0	0	0	0	0	0	0
dme-mir-ITS1_33_60_+	33	60	.................................AAAATGGTGTATTTTTAATTTCTTTCA.........	27	AAAATGGTGTATTTTTAATTTCTTTCA		0	0	0	0	0	0	0	0	0	0	0	0	0	0	0	0	0	0	0	0	0	0	0		0	0	0	0	0	0	0	0	0	0	0	0	0	0	0	0	0	0	0
dme-mir-ITS1_34_56_+	34	56	..................................AAATGGTGTATTTTTAATTTCT.............	22	AAATGGTGTATTTTTAATTTCT		0	0	0	0	0	0	0	0	1	0	0	0	0	0	0	0	0	0	0	0	0	0	0		0	0	0	0	2	0	0	0	0	0	0	0	0	0	0	0	0	0	0
dme-mir-ITS1_34_54_+	34	54	..................................AAATGGTGTATTTTTAATTT...............	20	AAATGGTGTATTTTTAATTT		0	0	0	0	0	0	0	0	0	0	0	0	0	0	0	0	0	0	0	0	0	0	0		0	0	0	0	0	0	0	0	0	0	0	0	0	0	0	0	0	0	0
dme-mir-ITS1_36_56_+	36	56	....................................ATGGTGTATTTTTAATTTCT.............	20	ATGGTGTATTTTTAATTTCT		0	0	0	0	0	0	0	0	0	0	0	1	0	0	0	0	0	0	0	0	0	0	0		0	0	0	0	1	0	0	0	0	0	0	0	0	0	0	0	0	0	0
dme-mir-ITS1_42_66_+	42	66	..........................................TATTTTTAATTTCTTTCAATAAAA...	24	TATTTTTAATTTCTTTCAATAAAA		0	0	1	0	0	0	0	0	0	0	0	0	0	0	0	0	0	0	0	0	0	0	0		0	0	0	2	0	0	0	0	0	0	0	0	0	0	0	0	0	0	0
dme-mir-ITS1_45_67_+	45	67	.............................................TTTTAATTTCTTTCAATAAAAA..	22	TTTTAATTTCTTTCAATAAAAA		0	0	0	0	0	0	0	0	0	0	0	0	0	0	0	0	0	0	0	2	2	0	0		0	0	0	0	0	0	0	0	0	0	0	0	0	0	0	0	0	0	0
dme-mir-ITS1_48_67_+	48	67	................................................TAATTTCTTTCAATAAAAA..	19	TAATTTCTTTCAATAAAAA		0	0	0	0	0	0	0	0	0	0	0	0	0	0	0	0	0	0	0	0	0	0	0		0	0	0	0	0	0	0	0	0	0	0	0	0	0	0	0	0	0	0
dme-mir-ITS1_48_66_+	48	66	................................................TAATTTCTTTCAATAAAA...	18	TAATTTCTTTCAATAAAA		0	0	0	0	0	0	0	0	0	0	0	0	0	0	0	0	0	0	0	0	0	0	0		0	0	0	0	0	0	0	0	0	0	0	0	0	0	0	0	0	0	0
dme-mir-ITS1_2_30_+	2	30	..ACATTTATTGAAGGAATTGATATATGCC.......................................	28	ACATTTATTGAAGGAATTGATATATGCC		0	0	0	0	0	2	0	0	0	0	0	0	0	0	0	0	0	0	0	0	0	0	0		0	0	0	0	0	0	0	0	0	0	0	0	0	0	0	0	0	0	0
dme-mir-ITS1_5_35_+	5	35	.....TTTATTGAAGGAATTGATATATGCCAGTAA..................................	30	TTTATTGAAGGAATTGATATATGCCAGTAA		0	0	0	0	0	0	0	0	0	0	0	0	0	0	0	0	0	0	0	0	0	0	0		0	0	0	0	0	0	0	0	0	0	0	0	0	0	0	0	0	0	0
dme-mir-ITS1_11_39_+	11	39	...........GAAGGAATTGATATATGCCAGTAAAATG..............................	28	GAAGGAATTGATATATGCCAGTAAAATG		0	0	0	0	0	0	0	0	0	0	0	0	0	0	0	0	0	0	0	0	1	0	0		0	0	0	0	0	0	0	0	0	0	0	0	0	0	0	0	0	0	0
dme-mir-ITS1_12_35_+	12	35	............AAGGAATTGATATATGCCAGTAA..................................	23	AAGGAATTGATATATGCCAGTAA		0	1	0	0	0	0	0	1	0	0	0	1	0	0	0	0	0	0	0	0	0	0	0		0	0	0	0	0	0	0	0	0	0	0	0	0	0	0	0	0	0	0
dme-mir-ITS1_12_32_+	12	32	............AAGGAATTGATATATGCCAG.....................................	20	AAGGAATTGATATATGCCAG		0	0	0	1	0	0	0	0	0	0	0	0	0	0	0	0	0	0	0	0	0	0	0		0	0	0	0	0	0	0	0	0	0	0	0	0	0	0	0	0	0	0
dme-mir-ITS1_13_36_+	13	36	.............AGGAATTGATATATGCCAGTAAA.................................	23	AGGAATTGATATATGCCAGTAAA		0	0	0	1	0	0	0	0	0	0	0	0	0	0	0	0	0	0	0	0	0	0	0		0	0	0	0	0	0	0	0	0	0	0	0	0	0	0	0	0	0	0
dme-mir-ITS1_13_32_+	13	32	.............AGGAATTGATATATGCCAG.....................................	19	AGGAATTGATATATGCCAG		0	0	0	0	0	0	0	0	0	0	0	1	0	0	0	0	0	0	0	0	0	0	0		0	0	0	0	0	0	0	0	0	0	0	0	0	0	0	0	0	0	0
dme-mir-ITS1_15_42_+	15	42	...............GAATTGATATATGCCAGTAAAATGGTG...........................	27	GAATTGATATATGCCAGTAAAATGGTG		0	0	0	0	0	0	0	0	0	0	0	0	0	0	0	0	0	0	0	0	0	0	0		0	0	0	0	0	0	0	0	0	0	0	0	0	0	0	0	0	0	0
dme-mir-ITS1_15_39_+	15	39	...............GAATTGATATATGCCAGTAAAATG..............................	24	GAATTGATATATGCCAGTAAAATG		0	0	0	0	0	0	0	0	0	0	1	0	0	0	0	0	1	0	0	0	0	0	0		0	0	0	0	0	0	0	0	0	0	0	0	0	0	0	0	0	0	0
dme-mir-ITS1_16_38_+	16	38	................AATTGATATATGCCAGTAAAAT...............................	22	AATTGATATATGCCAGTAAAAT		0	0	0	0	0	0	0	0	0	0	0	0	0	0	0	0	0	0	0	0	0	0	0		0	0	0	0	0	0	0	0	0	0	0	0	0	0	0	0	0	0	0
dme-mir-ITS1_19_46_+	19	46	...................TGATATATGCCAGTAAAATGGTGTATT.......................	27	TGATATATGCCAGTAAAATGGTGTATT		0	0	0	0	0	0	0	0	0	0	0	0	0	0	0	0	0	0	0	0	0	0	0		0	0	0	0	0	0	0	0	1	0	0	0	0	0	0	0	0	0	0
dme-mir-ITS1_20_46_+	20	46	....................GATATATGCCAGTAAAATGGTGTATT.......................	26	GATATATGCCAGTAAAATGGTGTATT		0	0	0	0	0	0	0	0	0	0	0	0	0	0	0	0	0	0	0	0	0	0	0		0	0	0	0	0	0	0	0	0	0	0	0	0	0	0	0	0	0	0
dme-mir-ITS1_22_46_+	22	46	......................TATATGCCAGTAAAATGGTGTATT.......................	24	TATATGCCAGTAAAATGGTGTATT		0	0	0	0	0	0	0	0	0	1	0	0	0	0	0	0	0	0	0	0	0	0	0		0	0	0	0	0	0	0	0	0	0	0	0	0	0	0	0	0	0	0
dme-mir-ITS1_23_43_+	23	43	.......................ATATGCCAGTAAAATGGTGT..........................	20	ATATGCCAGTAAAATGGTGT		0	0	0	0	0	0	0	0	0	0	0	1	0	0	0	0	0	0	0	0	0	0	0		0	0	0	0	0	0	0	0	0	0	0	0	0	0	0	0	0	0	0
dme-mir-ITS1_28_52_+	28	52	............................CCAGTAAAATGGTGTATTTTTAAT.................	24	CCAGTAAAATGGTGTATTTTTAAT		0	0	0	0	0	0	0	0	0	0	0	1	0	0	0	0	0	0	0	0	0	0	0		0	0	0	0	0	0	0	1	0	0	0	0	0	0	0	0	0	0	0
dme-mir-ITS1_29_56_+	29	56	.............................CAGTAAAATGGTGTATTTTTAATTTCT.............	27	CAGTAAAATGGTGTATTTTTAATTTCT		0	0	0	0	0	0	0	1	0	0	0	0	0	0	0	0	0	0	0	0	0	0	0		0	0	0	0	0	0	0	0	0	0	0	0	0	0	0	0	0	0	0
dme-mir-ITS1_29_55_+	29	55	.............................CAGTAAAATGGTGTATTTTTAATTTC..............	26	CAGTAAAATGGTGTATTTTTAATTTC		0	0	0	0	0	0	0	0	0	0	0	0	0	0	0	0	0	0	0	0	0	0	0		0	0	0	0	0	0	0	0	3	0	0	0	0	0	0	0	0	0	0
dme-mir-ITS1_29_47_+	29	47	.............................CAGTAAAATGGTGTATTT......................	18	CAGTAAAATGGTGTATTT		0	0	0	0	0	0	0	0	0	0	0	0	0	0	1	0	0	1	0	0	0	0	0		0	0	0	0	0	0	0	0	0	0	0	0	0	0	0	0	0	0	0
dme-mir-ITS1_30_54_+	30	54	..............................AGTAAAATGGTGTATTTTTAATTT...............	24	AGTAAAATGGTGTATTTTTAATTT		0	0	0	0	0	0	0	0	0	0	0	0	0	0	0	0	0	0	0	0	0	0	0		0	0	0	0	0	0	0	0	2	0	0	0	0	0	0	0	0	0	0
dme-mir-ITS1_30_53_+	30	53	..............................AGTAAAATGGTGTATTTTTAATT................	23	AGTAAAATGGTGTATTTTTAATT		0	0	0	0	0	0	0	0	0	0	1	0	0	0	0	0	0	1	0	0	0	0	0		0	0	0	0	0	0	0	0	0	0	0	0	0	0	0	0	0	0	0
dme-mir-ITS1_35_63_+	35	63	...................................AATGGTGTATTTTTAATTTCTTTCAATA......	28	AATGGTGTATTTTTAATTTCTTTCAATA		0	0	0	0	0	0	0	0	0	0	0	0	0	0	0	0	0	0	0	0	0	0	0		0	1	0	1	0	0	0	0	0	0	0	0	0	0	0	0	0	0	0
dme-mir-ITS1_35_62_+	35	62	...................................AATGGTGTATTTTTAATTTCTTTCAAT.......	27	AATGGTGTATTTTTAATTTCTTTCAAT		0	0	0	0	0	0	0	0	0	0	0	0	0	0	0	0	0	0	0	0	0	0	0		0	0	0	0	0	0	0	0	0	0	0	0	0	0	0	0	0	0	0
dme-mir-ITS1_36_62_+	36	62	....................................ATGGTGTATTTTTAATTTCTTTCAAT.......	26	ATGGTGTATTTTTAATTTCTTTCAAT		0	0	0	0	0	0	0	0	0	0	1	0	0	0	0	0	0	0	0	0	0	0	0		0	0	0	0	0	0	0	0	0	0	0	0	0	0	0	0	0	0	0
dme-mir-ITS1_36_58_+	36	58	....................................ATGGTGTATTTTTAATTTCTTT...........	22	ATGGTGTATTTTTAATTTCTTT		0	0	0	0	0	0	0	0	0	0	0	0	0	0	1	0	0	0	0	0	0	0	0		0	0	0	0	0	0	0	0	1	0	0	0	0	0	0	0	0	0	0
dme-mir-ITS1_36_54_+	36	54	....................................ATGGTGTATTTTTAATTT...............	18	ATGGTGTATTTTTAATTT		0	0	0	0	0	0	0	0	0	0	0	0	0	0	0	0	0	0	0	0	0	0	0		0	0	0	0	0	0	0	0	0	0	0	0	0	0	0	0	0	0	0
dme-mir-ITS1_38_58_+	38	58	......................................GGTGTATTTTTAATTTCTTT...........	20	GGTGTATTTTTAATTTCTTT		0	0	0	0	0	0	0	0	0	0	0	0	0	0	0	0	0	0	0	0	0	0	0		0	0	0	0	0	0	0	0	3	0	0	0	0	0	0	0	0	0	0
dme-mir-ITS1_39_65_+	39	65	.......................................GTGTATTTTTAATTTCTTTCAATAAA....	26	GTGTATTTTTAATTTCTTTCAATAAA		1	0	0	0	0	0	0	0	0	0	0	0	0	0	0	0	0	0	0	1	1	0	0		0	0	0	0	0	0	0	0	0	0	0	0	0	0	0	0	0	0	0
dme-mir-ITS1_40_58_+	40	58	........................................TGTATTTTTAATTTCTTT...........	18	TGTATTTTTAATTTCTTT		0	0	0	0	0	0	0	0	0	0	0	0	0	0	0	0	0	0	1	0	0	0	0		0	0	0	2	0	0	0	0	0	0	0	0	0	0	0	0	0	0	0
dme-mir-ITS1_42_61_+	42	61	..........................................TATTTTTAATTTCTTTCAA........	19	TATTTTTAATTTCTTTCAA		0	0	0	0	0	0	0	0	0	0	0	0	0	0	0	0	0	0	0	0	0	0	0		0	0	0	3	0	0	0	0	0	0	0	0	0	0	0	0	0	0	0
dme-mir-ITS1_44_63_+	44	63	............................................TTTTTAATTTCTTTCAATA......	19	TTTTTAATTTCTTTCAATA		0	0	0	0	0	0	0	0	0	0	0	0	0	0	0	0	0	0	0	0	0	0	0		0	0	0	3	0	0	0	0	0	0	0	0	0	0	0	0	0	0	0
dme-mir-ITS1_45_66_+	45	66	.............................................TTTTAATTTCTTTCAATAAAA...	21	TTTTAATTTCTTTCAATAAAA		0	0	0	0	0	0	0	0	0	0	0	0	0	0	0	0	0	0	0	0	2	0	0		0	0	0	0	0	0	0	0	0	0	0	0	0	0	0	0	0	0	0
dme-mir-ITS1_46_65_+	46	65	..............................................TTTAATTTCTTTCAATAAA....	19	TTTAATTTCTTTCAATAAA		0	0	0	0	0	0	0	0	0	0	0	0	0	0	0	0	0	0	1	0	0	0	0		0	0	0	0	0	0	0	0	0	0	0	0	0	0	0	0	0	0	0
dme-mir-ITS1_47_66_+	47	66	...............................................TTAATTTCTTTCAATAAAA...	19	TTAATTTCTTTCAATAAAA		0	0	0	0	0	0	0	0	0	0	0	0	0	0	0	0	0	0	1	0	0	0	0		0	0	0	0	0	0	0	0	0	0	0	0	0	0	0	0	0	0	0
dme-mir-ITS1_47_65_+	47	65	...............................................TTAATTTCTTTCAATAAA....	18	TTAATTTCTTTCAATAAA		0	0	0	0	0	0	0	0	0	0	0	0	0	0	0	0	0	0	0	0	0	0	0		0	0	0	0	1	0	0	2	0	0	0	0	0	0	0	0	0	0	0
dme-mir-ITS1_1_31_+	1	31	.TACATTTATTGAAGGAATTGATATATGCCA......................................	30	TACATTTATTGAAGGAATTGATATATGCCA		0	0	0	0	0	0	0	0	0	0	0	0	0	0	0	0	0	0	0	0	0	0	0		0	0	0	0	0	0	0	0	0	0	0	0	0	0	0	0	0	0	0
dme-mir-ITS1_3_32_+	3	32	...CATTTATTGAAGGAATTGATATATGCCAG.....................................	29	CATTTATTGAAGGAATTGATATATGCCAG		0	0	0	0	0	0	0	0	0	0	0	0	0	0	0	0	0	0	0	0	0	0	0		0	0	0	0	0	0	0	0	0	0	0	0	0	0	0	0	0	0	0
dme-mir-ITS1_4_34_+	4	34	....ATTTATTGAAGGAATTGATATATGCCAGTA...................................	30	ATTTATTGAAGGAATTGATATATGCCAGTA		0	0	0	0	0	0	0	0	0	0	0	0	0	0	0	0	0	0	0	0	0	0	0		0	0	0	0	2	0	0	0	0	0	0	0	0	0	0	0	0	0	0
dme-mir-ITS1_6_36_+	6	36	......TTATTGAAGGAATTGATATATGCCAGTAAA.................................	30	TTATTGAAGGAATTGATATATGCCAGTAAA		0	0	0	0	0	0	0	0	0	0	0	0	0	0	0	0	0	0	0	0	0	0	0		0	0	0	0	0	0	0	0	0	0	0	0	0	0	0	0	0	0	0
dme-mir-ITS1_8_37_+	8	37	........ATTGAAGGAATTGATATATGCCAGTAAAA................................	29	ATTGAAGGAATTGATATATGCCAGTAAAA		0	0	0	0	0	1	0	0	0	0	0	0	0	0	0	0	0	0	0	0	0	0	0		0	0	0	0	0	0	0	0	0	0	0	0	0	0	0	0	0	0	0
dme-mir-ITS1_10_40_+	10	40	..........TGAAGGAATTGATATATGCCAGTAAAATGG.............................	30	TGAAGGAATTGATATATGCCAGTAAAATGG		0	0	0	0	0	0	0	0	0	0	0	0	0	0	0	0	0	0	0	0	0	0	0		0	0	0	0	0	0	0	0	0	0	0	0	0	0	0	0	0	0	0
dme-mir-ITS1_10_39_+	10	39	..........TGAAGGAATTGATATATGCCAGTAAAATG..............................	29	TGAAGGAATTGATATATGCCAGTAAAATG		0	0	0	0	0	0	0	0	0	0	0	0	0	0	0	0	0	0	1	1	0	0	0		0	0	0	0	0	0	0	0	0	0	0	0	0	0	0	0	0	0	0
dme-mir-ITS1_11_40_+	11	40	...........GAAGGAATTGATATATGCCAGTAAAATGG.............................	29	GAAGGAATTGATATATGCCAGTAAAATGG		0	0	0	0	0	0	0	0	0	0	0	0	0	0	0	0	0	0	0	0	0	0	0		0	0	0	0	0	0	0	0	0	0	0	0	0	0	0	0	0	0	0
dme-mir-ITS1_11_38_+	11	38	...........GAAGGAATTGATATATGCCAGTAAAAT...............................	27	GAAGGAATTGATATATGCCAGTAAAAT		0	0	0	0	0	0	0	0	0	0	0	0	0	0	0	0	0	0	0	0	0	0	0		0	0	0	0	0	0	0	0	0	0	0	0	0	0	0	0	0	0	0
dme-mir-ITS1_14_33_+	14	33	..............GGAATTGATATATGCCAGT....................................	19	GGAATTGATATATGCCAGT		0	0	0	0	0	0	0	0	0	0	0	0	0	0	0	0	1	0	0	0	0	0	0		0	0	0	0	0	0	0	1	0	0	0	0	0	0	0	0	0	0	0
dme-mir-ITS1_15_41_+	15	41	...............GAATTGATATATGCCAGTAAAATGGT............................	26	GAATTGATATATGCCAGTAAAATGGT		0	0	0	0	0	0	0	0	0	0	0	0	0	0	1	0	0	0	0	0	0	0	0		0	0	0	0	0	0	0	0	0	0	0	0	0	0	0	0	0	0	0
dme-mir-ITS1_15_40_+	15	40	...............GAATTGATATATGCCAGTAAAATGG.............................	25	GAATTGATATATGCCAGTAAAATGG		0	0	0	0	0	0	0	0	0	0	0	0	0	0	0	0	0	0	0	0	0	0	0		0	0	0	0	0	0	0	0	0	0	0	0	0	0	0	0	0	0	0
dme-mir-ITS1_15_34_+	15	34	...............GAATTGATATATGCCAGTA...................................	19	GAATTGATATATGCCAGTA		0	0	0	0	0	0	0	0	0	0	0	0	0	0	0	0	0	0	0	0	0	0	0		0	0	0	0	0	0	0	0	0	0	0	0	0	0	0	0	0	0	0
dme-mir-ITS1_16_43_+	16	43	................AATTGATATATGCCAGTAAAATGGTGT..........................	27	AATTGATATATGCCAGTAAAATGGTGT		0	0	0	0	0	0	0	0	0	0	0	0	0	0	0	0	0	0	0	0	0	0	0		0	0	0	0	0	0	0	0	0	0	0	0	0	0	0	0	0	0	0
dme-mir-ITS1_16_40_+	16	40	................AATTGATATATGCCAGTAAAATGG.............................	24	AATTGATATATGCCAGTAAAATGG		0	0	0	0	2	0	0	0	0	0	0	0	0	0	0	0	0	0	0	0	0	0	0		0	0	0	0	0	0	0	0	0	0	0	0	0	0	0	0	0	0	0
dme-mir-ITS1_18_47_+	18	47	..................TTGATATATGCCAGTAAAATGGTGTATTT......................	29	TTGATATATGCCAGTAAAATGGTGTATTT		0	0	0	0	0	0	0	0	0	0	0	0	0	0	0	0	0	0	0	2	0	0	0		0	0	0	0	0	0	0	0	0	0	0	0	0	0	0	0	0	0	0
dme-mir-ITS1_18_38_+	18	38	..................TTGATATATGCCAGTAAAAT...............................	20	TTGATATATGCCAGTAAAAT		0	0	0	0	0	0	0	0	0	0	0	0	0	0	0	0	0	0	0	0	0	0	0		0	0	0	0	0	0	0	0	0	0	0	0	0	0	0	0	0	0	0
dme-mir-ITS1_18_36_+	18	36	..................TTGATATATGCCAGTAAA.................................	18	TTGATATATGCCAGTAAA		0	0	0	0	0	0	0	0	0	0	0	0	0	0	0	0	0	0	1	0	0	0	0		0	0	0	0	0	0	0	1	0	0	0	0	0	0	0	0	0	0	0
dme-mir-ITS1_19_44_+	19	44	...................TGATATATGCCAGTAAAATGGTGTA.........................	25	TGATATATGCCAGTAAAATGGTGTA		0	0	0	0	0	0	0	0	0	0	0	0	0	0	0	0	0	0	0	0	0	0	0		0	0	0	0	0	0	0	0	0	0	0	0	0	0	0	0	0	0	0
dme-mir-ITS1_19_40_+	19	40	...................TGATATATGCCAGTAAAATGG.............................	21	TGATATATGCCAGTAAAATGG		0	0	0	0	0	0	0	0	0	0	0	0	0	0	0	0	0	0	0	0	0	0	0		0	0	0	2	0	0	0	0	0	0	0	0	0	0	0	0	0	0	0
dme-mir-ITS1_20_45_+	20	45	....................GATATATGCCAGTAAAATGGTGTAT........................	25	GATATATGCCAGTAAAATGGTGTAT		0	0	0	0	0	0	0	0	0	0	0	0	0	0	0	0	0	0	0	0	0	0	0		0	0	0	0	0	0	0	0	0	0	0	0	0	0	0	0	0	0	0
dme-mir-ITS1_20_43_+	20	43	....................GATATATGCCAGTAAAATGGTGT..........................	23	GATATATGCCAGTAAAATGGTGT		0	0	0	0	0	1	0	0	0	0	0	0	0	0	0	0	0	0	0	0	0	0	0		0	0	0	0	0	0	0	0	0	0	0	0	0	0	0	0	0	0	0
dme-mir-ITS1_21_45_+	21	45	.....................ATATATGCCAGTAAAATGGTGTAT........................	24	ATATATGCCAGTAAAATGGTGTAT		0	0	0	0	0	0	0	0	0	0	0	0	0	0	0	0	0	0	1	0	0	0	0		0	0	0	1	0	0	0	0	0	0	0	0	0	0	0	0	0	0	0
dme-mir-ITS1_22_49_+	22	49	......................TATATGCCAGTAAAATGGTGTATTTTT....................	27	TATATGCCAGTAAAATGGTGTATTTTT		0	0	0	0	0	0	0	0	0	0	0	0	0	0	0	0	0	0	0	0	0	0	0		0	0	0	0	0	0	0	0	0	0	0	0	0	0	0	0	0	0	0
dme-mir-ITS1_22_45_+	22	45	......................TATATGCCAGTAAAATGGTGTAT........................	23	TATATGCCAGTAAAATGGTGTAT		0	0	0	0	0	0	0	0	0	0	0	0	0	0	0	0	0	0	0	0	0	0	0		0	0	0	0	0	0	0	1	0	0	0	0	0	0	0	0	0	0	0
dme-mir-ITS1_22_40_+	22	40	......................TATATGCCAGTAAAATGG.............................	18	TATATGCCAGTAAAATGG		0	0	0	0	0	0	0	0	0	0	0	0	0	0	0	0	0	0	0	0	0	0	0		0	0	0	0	0	0	0	0	0	0	0	0	0	0	0	0	0	0	0
dme-mir-ITS1_23_49_+	23	49	.......................ATATGCCAGTAAAATGGTGTATTTTT....................	26	ATATGCCAGTAAAATGGTGTATTTTT		0	0	0	0	0	0	0	0	0	0	0	0	0	0	0	0	0	0	0	0	0	0	0		0	0	0	0	0	0	0	0	2	0	0	0	0	0	0	0	0	0	0
dme-mir-ITS1_23_46_+	23	46	.......................ATATGCCAGTAAAATGGTGTATT.......................	23	ATATGCCAGTAAAATGGTGTATT		0	0	0	0	0	0	0	0	0	0	0	0	0	0	0	0	0	0	0	0	0	0	0		0	0	0	0	0	0	0	1	0	0	0	0	0	0	0	0	0	0	0
dme-mir-ITS1_24_49_+	24	49	........................TATGCCAGTAAAATGGTGTATTTTT....................	25	TATGCCAGTAAAATGGTGTATTTTT		0	0	0	0	0	0	0	0	1	0	0	0	0	0	0	0	0	0	0	0	0	0	0		0	0	0	0	0	0	0	0	0	0	0	0	0	0	0	0	0	0	0
dme-mir-ITS1_26_53_+	26	53	..........................TGCCAGTAAAATGGTGTATTTTTAATT................	27	TGCCAGTAAAATGGTGTATTTTTAATT		0	0	0	0	0	0	0	0	0	0	0	0	0	0	0	0	0	0	0	0	0	0	0		0	0	0	0	0	0	0	0	0	0	0	0	0	0	0	0	0	0	0
dme-mir-ITS1_27_46_+	27	46	...........................GCCAGTAAAATGGTGTATT.......................	19	GCCAGTAAAATGGTGTATT		0	0	0	0	0	0	0	0	0	0	0	0	0	0	0	0	0	0	0	0	0	0	0		0	0	0	0	0	0	0	1	1	0	0	0	0	0	0	0	0	0	0
dme-mir-ITS1_28_53_+	28	53	............................CCAGTAAAATGGTGTATTTTTAATT................	25	CCAGTAAAATGGTGTATTTTTAATT		0	0	0	0	0	0	0	0	0	0	0	0	0	0	0	0	0	0	0	0	0	0	0		0	0	0	0	0	0	0	0	0	0	0	0	0	0	0	0	0	0	0
dme-mir-ITS1_31_49_+	31	49	...............................GTAAAATGGTGTATTTTT....................	18	GTAAAATGGTGTATTTTT		0	0	0	0	0	0	0	0	0	0	0	1	0	0	0	0	0	0	0	0	0	0	0		0	0	0	0	1	0	0	0	0	0	0	0	0	0	0	0	0	0	0
dme-mir-ITS1_32_53_+	32	53	................................TAAAATGGTGTATTTTTAATT................	21	TAAAATGGTGTATTTTTAATT		0	0	0	0	0	0	0	0	0	0	0	0	0	0	0	0	0	0	0	0	0	0	0		0	0	0	0	0	0	0	1	0	0	0	0	0	0	0	0	0	0	0
dme-mir-ITS1_32_52_+	32	52	................................TAAAATGGTGTATTTTTAAT.................	20	TAAAATGGTGTATTTTTAAT		0	0	0	0	0	0	0	0	0	0	0	1	0	0	0	0	0	0	0	0	0	0	0		0	0	0	0	1	0	0	0	0	0	0	0	0	0	0	0	0	0	0
dme-mir-ITS1_33_56_+	33	56	.................................AAAATGGTGTATTTTTAATTTCT.............	23	AAAATGGTGTATTTTTAATTTCT		0	0	0	0	0	0	0	0	0	0	0	0	0	0	0	0	0	0	0	0	0	0	0		0	0	0	0	0	0	0	0	0	0	0	0	0	0	0	0	0	0	0
dme-mir-ITS1_33_52_+	33	52	.................................AAAATGGTGTATTTTTAAT.................	19	AAAATGGTGTATTTTTAAT		1	0	0	0	0	0	0	0	0	0	0	0	0	0	0	0	0	0	0	0	0	0	0		0	0	0	0	0	0	0	0	0	0	0	0	0	0	0	0	0	0	0
dme-mir-ITS1_35_59_+	35	59	...................................AATGGTGTATTTTTAATTTCTTTC..........	24	AATGGTGTATTTTTAATTTCTTTC		0	0	0	0	0	0	0	0	0	0	0	0	0	0	0	0	0	0	0	0	0	0	0		0	0	0	0	0	0	0	0	0	0	0	0	0	0	0	0	0	0	0
dme-mir-ITS1_35_56_+	35	56	...................................AATGGTGTATTTTTAATTTCT.............	21	AATGGTGTATTTTTAATTTCT		0	0	0	0	0	0	0	0	0	0	0	0	0	0	0	0	0	0	0	0	0	0	0		0	0	0	0	0	0	0	0	0	0	0	0	0	0	0	0	0	0	0
dme-mir-ITS1_36_64_+	36	64	....................................ATGGTGTATTTTTAATTTCTTTCAATAA.....	28	ATGGTGTATTTTTAATTTCTTTCAATAA		0	0	0	0	0	0	0	0	0	0	0	0	0	0	0	0	0	0	0	0	0	1	0		0	0	0	0	0	0	0	0	0	0	0	0	0	0	0	0	0	0	0
dme-mir-ITS1_36_59_+	36	59	....................................ATGGTGTATTTTTAATTTCTTTC..........	23	ATGGTGTATTTTTAATTTCTTTC		0	0	0	0	0	0	0	0	0	0	0	0	0	1	0	0	0	0	0	0	0	0	0		0	0	0	0	0	0	0	0	0	0	0	0	0	0	0	0	0	0	0
dme-mir-ITS1_36_57_+	36	57	....................................ATGGTGTATTTTTAATTTCTT............	21	ATGGTGTATTTTTAATTTCTT		0	0	0	0	0	0	0	0	0	0	0	0	0	0	0	0	0	0	0	0	0	0	0		0	0	0	0	1	0	0	0	0	0	0	0	0	0	0	0	0	0	0
dme-mir-ITS1_36_55_+	36	55	....................................ATGGTGTATTTTTAATTTC..............	19	ATGGTGTATTTTTAATTTC		0	0	0	0	0	0	0	0	0	0	0	1	0	0	0	0	0	0	0	0	0	0	0		0	0	0	0	0	0	0	0	0	0	0	0	0	0	0	0	0	0	0
dme-mir-ITS1_39_61_+	39	61	.......................................GTGTATTTTTAATTTCTTTCAA........	22	GTGTATTTTTAATTTCTTTCAA		2	0	0	0	0	0	0	0	0	0	0	0	0	0	0	0	0	0	0	0	0	0	0		0	0	0	0	0	0	0	0	0	0	0	0	0	0	0	0	0	0	0
dme-mir-ITS1_39_59_+	39	59	.......................................GTGTATTTTTAATTTCTTTC..........	20	GTGTATTTTTAATTTCTTTC		0	0	0	0	0	0	0	0	0	0	0	0	0	0	0	0	0	0	1	0	0	1	0		0	0	0	0	0	0	0	0	0	0	0	0	0	0	0	0	0	0	0
dme-mir-ITS1_42_60_+	42	60	..........................................TATTTTTAATTTCTTTCA.........	18	TATTTTTAATTTCTTTCA		0	0	0	0	0	0	0	0	0	0	0	0	0	0	0	0	0	0	0	0	0	0	0		0	0	0	1	1	0	0	0	0	0	0	0	0	0	0	0	0	0	0
dme-mir-ITS1_44_65_+	44	65	............................................TTTTTAATTTCTTTCAATAAA....	21	TTTTTAATTTCTTTCAATAAA		0	0	0	0	0	0	0	0	0	0	0	0	0	0	0	0	0	0	0	0	0	0	0		0	0	0	2	0	0	0	0	0	0	0	0	0	0	0	0	0	0	0
dme-mir-ITS1_44_64_+	44	64	............................................TTTTTAATTTCTTTCAATAA.....	20	TTTTTAATTTCTTTCAATAA		0	0	0	0	0	0	0	0	0	0	0	0	0	0	0	0	0	0	0	0	0	0	0		0	0	0	2	0	0	0	0	0	0	0	0	0	0	0	0	0	0	0
dme-mir-ITS1_46_67_+	46	67	..............................................TTTAATTTCTTTCAATAAAAA..	21	TTTAATTTCTTTCAATAAAAA		1	0	0	0	0	0	0	0	0	0	0	0	0	0	0	0	0	0	1	0	0	0	0		0	0	0	0	0	0	0	0	0	0	0	0	0	0	0	0	0	0	0
dme-mir-ITS1_46_66_+	46	66	..............................................TTTAATTTCTTTCAATAAAA...	20	TTTAATTTCTTTCAATAAAA		0	0	0	0	0	0	0	0	0	0	0	0	0	0	0	0	0	0	0	0	0	0	0		0	0	0	0	0	0	0	0	0	0	0	0	0	0	0	0	0	0	0
dme-mir-ITS1_0_27_+	0	27	ATACATTTATTGAAGGAATTGATATAT..........................................	27	ATACATTTATTGAAGGAATTGATATAT		0	0	0	0	1	0	0	0	0	0	0	0	0	0	0	0	0	0	0	0	0	0	0		0	0	0	0	0	0	0	0	0	0	0	0	0	0	0	0	0	0	0
dme-mir-ITS1_1_19_+	1	19	.TACATTTATTGAAGGAAT..................................................	18	TACATTTATTGAAGGAAT		0	0	0	0	0	0	0	0	0	0	0	0	0	0	0	0	0	0	0	0	0	0	0		0	0	0	0	0	0	0	0	0	0	0	0	0	0	0	0	0	0	0
dme-mir-ITS1_8_36_+	8	36	........ATTGAAGGAATTGATATATGCCAGTAAA.................................	28	ATTGAAGGAATTGATATATGCCAGTAAA		0	0	0	0	0	0	0	0	0	0	0	0	0	0	0	0	0	0	0	0	0	0	0		0	0	0	0	0	0	0	0	0	0	0	0	0	0	0	0	0	0	0
dme-mir-ITS1_11_41_+	11	41	...........GAAGGAATTGATATATGCCAGTAAAATGGT............................	30	GAAGGAATTGATATATGCCAGTAAAATGGT		0	0	0	0	0	0	0	0	0	0	0	0	0	0	0	0	0	0	0	0	0	0	0		0	0	0	0	0	0	0	0	0	0	0	0	0	0	0	0	0	0	0
dme-mir-ITS1_12_34_+	12	34	............AAGGAATTGATATATGCCAGTA...................................	22	AAGGAATTGATATATGCCAGTA		0	0	0	0	0	0	0	0	0	0	0	0	0	0	0	0	0	0	0	0	0	0	0		0	0	0	0	0	0	0	0	0	0	0	0	0	0	0	0	0	0	0
dme-mir-ITS1_13_34_+	13	34	.............AGGAATTGATATATGCCAGTA...................................	21	AGGAATTGATATATGCCAGTA		0	0	0	0	0	0	0	0	0	0	0	0	0	0	0	0	0	0	0	0	0	0	0		0	0	0	0	0	0	0	1	0	0	0	0	0	0	0	0	0	0	0
dme-mir-ITS1_14_37_+	14	37	..............GGAATTGATATATGCCAGTAAAA................................	23	GGAATTGATATATGCCAGTAAAA		0	0	0	0	0	0	0	0	0	0	0	0	0	0	0	0	0	0	0	0	0	0	0		0	0	0	0	0	0	0	0	0	0	0	0	0	0	0	0	0	0	0
dme-mir-ITS1_14_36_+	14	36	..............GGAATTGATATATGCCAGTAAA.................................	22	GGAATTGATATATGCCAGTAAA		0	0	0	0	0	0	0	0	0	0	0	0	0	0	0	0	0	0	0	0	0	0	0		0	0	0	0	0	0	0	0	0	0	0	0	0	0	0	0	0	0	0
dme-mir-ITS1_14_32_+	14	32	..............GGAATTGATATATGCCAG.....................................	18	GGAATTGATATATGCCAG		0	0	0	0	0	0	0	0	0	0	0	0	0	0	0	0	0	0	0	0	0	0	0		0	0	0	0	0	0	0	0	1	0	0	0	0	0	0	0	0	0	0
dme-mir-ITS1_15_37_+	15	37	...............GAATTGATATATGCCAGTAAAA................................	22	GAATTGATATATGCCAGTAAAA		0	0	0	0	0	0	0	0	0	0	0	0	0	0	0	0	0	1	0	0	0	0	0		0	0	0	0	0	0	0	0	0	0	0	0	0	0	0	0	0	0	0
dme-mir-ITS1_15_36_+	15	36	...............GAATTGATATATGCCAGTAAA.................................	21	GAATTGATATATGCCAGTAAA		0	0	0	0	0	0	0	0	0	0	0	0	0	0	0	0	0	0	0	0	0	0	0		0	0	0	0	0	0	0	0	1	0	0	0	0	0	0	0	0	0	0
dme-mir-ITS1_15_33_+	15	33	...............GAATTGATATATGCCAGT....................................	18	GAATTGATATATGCCAGT		0	0	0	0	0	0	0	0	0	0	0	0	0	0	0	0	0	0	0	0	0	0	0		0	0	0	0	0	0	0	0	0	0	0	0	0	0	0	0	0	0	0
dme-mir-ITS1_16_42_+	16	42	................AATTGATATATGCCAGTAAAATGGTG...........................	26	AATTGATATATGCCAGTAAAATGGTG		0	0	0	0	0	0	0	0	0	0	0	0	0	0	0	0	0	0	0	0	0	0	0		0	0	0	0	0	0	0	0	0	0	0	0	0	0	0	0	0	0	0
dme-mir-ITS1_16_37_+	16	37	................AATTGATATATGCCAGTAAAA................................	21	AATTGATATATGCCAGTAAAA		0	0	0	0	0	0	0	0	0	0	0	0	0	0	0	0	0	0	0	0	0	0	0		0	0	0	0	0	0	0	1	0	0	0	0	0	0	0	0	0	0	0
dme-mir-ITS1_17_44_+	17	44	.................ATTGATATATGCCAGTAAAATGGTGTA.........................	27	ATTGATATATGCCAGTAAAATGGTGTA		0	0	0	0	0	0	0	0	0	0	0	0	0	0	0	0	0	0	0	0	0	0	0		0	0	0	0	0	0	0	0	0	0	0	0	0	0	0	0	0	0	0
dme-mir-ITS1_17_42_+	17	42	.................ATTGATATATGCCAGTAAAATGGTG...........................	25	ATTGATATATGCCAGTAAAATGGTG		0	0	0	0	1	0	0	0	0	0	0	0	0	0	0	0	0	0	0	0	0	0	0		0	0	0	0	0	0	0	0	0	0	0	0	0	0	0	0	0	0	0
dme-mir-ITS1_17_41_+	17	41	.................ATTGATATATGCCAGTAAAATGGT............................	24	ATTGATATATGCCAGTAAAATGGT		0	0	0	0	0	0	0	0	0	1	0	0	0	0	0	0	0	0	0	0	0	0	0		0	0	0	0	0	0	0	0	0	0	0	0	0	0	0	0	0	0	0
dme-mir-ITS1_18_46_+	18	46	..................TTGATATATGCCAGTAAAATGGTGTATT.......................	28	TTGATATATGCCAGTAAAATGGTGTATT		0	0	0	0	0	1	0	0	0	0	0	0	0	0	0	0	0	0	0	0	0	0	0		0	0	0	0	0	0	0	0	0	0	0	0	0	0	0	0	0	0	0
dme-mir-ITS1_18_45_+	18	45	..................TTGATATATGCCAGTAAAATGGTGTAT........................	27	TTGATATATGCCAGTAAAATGGTGTAT		0	0	0	0	0	0	0	0	0	0	0	0	0	0	0	0	0	0	0	0	0	0	0		0	0	0	0	1	0	0	0	0	0	0	0	0	0	0	0	0	0	0
dme-mir-ITS1_18_42_+	18	42	..................TTGATATATGCCAGTAAAATGGTG...........................	24	TTGATATATGCCAGTAAAATGGTG		0	0	0	0	0	0	0	0	0	0	0	0	0	0	0	0	0	0	0	0	0	1	0		0	0	0	0	0	0	0	0	0	0	0	0	0	0	0	0	0	0	0
dme-mir-ITS1_18_41_+	18	41	..................TTGATATATGCCAGTAAAATGGT............................	23	TTGATATATGCCAGTAAAATGGT		0	0	0	0	0	0	0	0	0	0	0	0	0	0	0	0	0	0	0	0	0	0	0		0	0	0	0	0	0	0	0	0	0	0	0	0	0	0	0	0	0	0
dme-mir-ITS1_19_49_+	19	49	...................TGATATATGCCAGTAAAATGGTGTATTTTT....................	30	TGATATATGCCAGTAAAATGGTGTATTTTT		0	0	0	0	0	0	0	0	0	0	0	0	0	0	0	0	0	0	0	0	0	0	0		0	0	0	0	0	0	0	0	0	0	0	0	0	0	0	0	0	0	0
dme-mir-ITS1_19_48_+	19	48	...................TGATATATGCCAGTAAAATGGTGTATTTT.....................	29	TGATATATGCCAGTAAAATGGTGTATTTT		0	0	0	0	0	0	0	0	0	0	0	0	0	0	0	0	0	0	0	0	0	0	0		0	0	0	0	1	0	0	0	0	0	0	0	0	0	0	0	0	0	0
dme-mir-ITS1_19_43_+	19	43	...................TGATATATGCCAGTAAAATGGTGT..........................	24	TGATATATGCCAGTAAAATGGTGT		0	0	0	0	0	0	0	0	0	0	0	0	0	0	0	0	0	0	0	0	0	0	0		0	0	0	0	0	0	0	0	0	0	0	0	0	0	0	0	0	0	0
dme-mir-ITS1_19_41_+	19	41	...................TGATATATGCCAGTAAAATGGT............................	22	TGATATATGCCAGTAAAATGGT		0	0	0	0	0	0	0	0	0	0	0	0	0	0	0	0	0	0	0	0	0	0	0		0	0	0	0	0	0	0	0	0	0	0	0	0	0	0	0	0	0	0
dme-mir-ITS1_21_43_+	21	43	.....................ATATATGCCAGTAAAATGGTGT..........................	22	ATATATGCCAGTAAAATGGTGT		0	0	0	0	0	0	0	0	0	0	0	0	0	0	0	0	0	0	0	0	0	0	0		0	0	0	0	0	0	0	0	0	0	0	0	0	0	0	0	0	0	0
dme-mir-ITS1_21_40_+	21	40	.....................ATATATGCCAGTAAAATGG.............................	19	ATATATGCCAGTAAAATGG		0	0	0	0	0	0	0	0	0	0	0	0	0	0	0	0	0	0	0	0	0	0	0		0	0	1	0	0	0	0	0	0	0	0	0	0	0	0	0	0	0	0
dme-mir-ITS1_22_48_+	22	48	......................TATATGCCAGTAAAATGGTGTATTTT.....................	26	TATATGCCAGTAAAATGGTGTATTTT		0	0	0	0	0	0	0	0	0	0	0	0	0	0	0	0	0	0	0	0	0	0	0		0	0	0	0	0	0	0	0	0	0	0	0	0	0	0	0	0	0	0
dme-mir-ITS1_22_47_+	22	47	......................TATATGCCAGTAAAATGGTGTATTT......................	25	TATATGCCAGTAAAATGGTGTATTT		0	0	0	0	0	0	0	0	0	0	0	0	0	0	0	0	0	0	0	0	0	0	0		0	0	0	0	0	0	0	1	0	0	0	0	0	0	0	0	0	0	0
dme-mir-ITS1_22_41_+	22	41	......................TATATGCCAGTAAAATGGT............................	19	TATATGCCAGTAAAATGGT		0	0	0	0	0	0	0	0	0	0	0	0	0	0	0	0	0	0	0	0	1	0	0		0	0	0	0	0	0	0	0	0	0	0	0	0	0	0	0	0	0	0
dme-mir-ITS1_23_45_+	23	45	.......................ATATGCCAGTAAAATGGTGTAT........................	22	ATATGCCAGTAAAATGGTGTAT		0	0	0	0	0	0	0	0	0	0	1	0	0	0	0	0	0	0	0	0	0	0	0		0	0	0	0	0	0	0	0	0	0	0	0	0	0	0	0	0	0	0
dme-mir-ITS1_24_53_+	24	53	........................TATGCCAGTAAAATGGTGTATTTTTAATT................	29	TATGCCAGTAAAATGGTGTATTTTTAATT		0	0	0	0	0	0	0	0	0	0	0	0	0	0	0	0	0	0	0	0	0	0	0		0	0	0	0	0	0	0	0	0	0	0	0	0	0	0	0	0	0	0
dme-mir-ITS1_24_52_+	24	52	........................TATGCCAGTAAAATGGTGTATTTTTAAT.................	28	TATGCCAGTAAAATGGTGTATTTTTAAT		0	0	0	0	0	0	0	0	0	0	0	0	0	0	0	0	0	0	0	0	0	0	0		0	0	0	0	0	0	0	0	0	0	0	0	0	0	0	0	0	0	0
dme-mir-ITS1_25_48_+	25	48	.........................ATGCCAGTAAAATGGTGTATTTT.....................	23	ATGCCAGTAAAATGGTGTATTTT		0	0	0	0	0	0	0	0	0	0	0	0	0	0	0	0	0	0	0	0	0	0	0		0	0	0	0	0	0	0	0	0	0	0	0	0	0	0	0	0	0	0
dme-mir-ITS1_25_46_+	25	46	.........................ATGCCAGTAAAATGGTGTATT.......................	21	ATGCCAGTAAAATGGTGTATT		0	0	0	0	0	0	0	0	0	0	0	0	0	0	0	0	0	0	0	0	0	0	0		0	0	0	0	0	0	0	1	0	0	0	0	0	0	0	0	0	0	0
dme-mir-ITS1_26_49_+	26	49	..........................TGCCAGTAAAATGGTGTATTTTT....................	23	TGCCAGTAAAATGGTGTATTTTT		0	0	0	0	0	0	0	0	0	0	0	0	0	0	0	0	0	0	0	0	0	0	0		0	0	0	0	0	0	0	0	0	0	0	0	0	0	0	0	0	0	0
dme-mir-ITS1_27_52_+	27	52	...........................GCCAGTAAAATGGTGTATTTTTAAT.................	25	GCCAGTAAAATGGTGTATTTTTAAT		0	0	0	0	0	0	0	0	0	0	0	1	0	0	0	0	0	0	0	0	0	0	0		0	0	0	0	0	0	0	0	0	0	0	0	0	0	0	0	0	0	0
dme-mir-ITS1_27_51_+	27	51	...........................GCCAGTAAAATGGTGTATTTTTAA..................	24	GCCAGTAAAATGGTGTATTTTTAA		0	0	0	0	0	0	0	0	0	0	0	0	0	0	0	0	1	0	0	0	0	0	0		0	0	0	0	0	0	0	0	0	0	0	0	0	0	0	0	0	0	0
dme-mir-ITS1_28_57_+	28	57	............................CCAGTAAAATGGTGTATTTTTAATTTCTT............	29	CCAGTAAAATGGTGTATTTTTAATTTCTT		0	0	0	0	0	0	0	0	0	0	0	0	0	0	0	0	0	0	0	0	0	0	0		0	0	0	0	0	0	0	0	0	0	0	0	0	0	0	0	0	0	0
dme-mir-ITS1_28_49_+	28	49	............................CCAGTAAAATGGTGTATTTTT....................	21	CCAGTAAAATGGTGTATTTTT		0	0	0	0	0	0	0	0	0	0	0	0	0	0	0	0	0	0	0	0	0	0	0		0	0	0	0	1	0	0	0	0	0	0	0	0	0	0	0	0	0	0
dme-mir-ITS1_29_57_+	29	57	.............................CAGTAAAATGGTGTATTTTTAATTTCTT............	28	CAGTAAAATGGTGTATTTTTAATTTCTT		0	0	0	0	0	0	0	0	0	0	0	0	0	0	0	0	0	0	0	0	0	1	0		0	0	0	0	0	0	0	0	0	0	0	0	0	0	0	0	0	0	0
dme-mir-ITS1_29_54_+	29	54	.............................CAGTAAAATGGTGTATTTTTAATTT...............	25	CAGTAAAATGGTGTATTTTTAATTT		0	0	0	0	0	0	0	0	0	0	0	0	0	0	0	0	0	0	0	0	0	0	0		0	0	0	0	0	0	0	0	0	0	0	0	0	0	0	0	0	0	0
dme-mir-ITS1_29_48_+	29	48	.............................CAGTAAAATGGTGTATTTT.....................	19	CAGTAAAATGGTGTATTTT		0	0	0	0	0	0	0	0	0	0	0	0	0	0	0	0	0	0	0	0	0	0	0		0	0	0	0	0	0	0	0	0	0	0	0	0	0	0	0	0	0	0
dme-mir-ITS1_30_56_+	30	56	..............................AGTAAAATGGTGTATTTTTAATTTCT.............	26	AGTAAAATGGTGTATTTTTAATTTCT		0	0	0	0	0	0	0	0	0	0	0	0	0	0	0	0	0	0	0	0	0	0	0		0	0	0	0	0	0	0	0	0	0	0	0	0	0	0	0	0	0	0
dme-mir-ITS1_31_57_+	31	57	...............................GTAAAATGGTGTATTTTTAATTTCTT............	26	GTAAAATGGTGTATTTTTAATTTCTT		0	0	0	0	0	0	0	0	0	0	0	0	0	0	0	0	0	0	0	0	0	0	0		0	0	0	0	0	0	0	0	0	0	0	0	0	0	0	0	0	0	0
dme-mir-ITS1_31_50_+	31	50	...............................GTAAAATGGTGTATTTTTA...................	19	GTAAAATGGTGTATTTTTA		0	0	0	0	0	0	0	0	0	0	0	0	0	0	0	0	0	0	0	0	0	0	0		1	0	0	0	0	0	0	0	0	0	0	0	0	0	0	0	0	0	0
dme-mir-ITS1_33_54_+	33	54	.................................AAAATGGTGTATTTTTAATTT...............	21	AAAATGGTGTATTTTTAATTT		0	0	0	0	0	0	0	0	0	0	0	0	0	0	0	0	0	0	0	0	0	0	0		0	0	0	0	0	0	0	0	0	0	0	0	0	0	0	0	0	0	0
dme-mir-ITS1_33_53_+	33	53	.................................AAAATGGTGTATTTTTAATT................	20	AAAATGGTGTATTTTTAATT		0	0	0	0	0	0	0	0	0	0	0	0	0	0	0	0	0	0	0	0	0	0	0		0	0	0	0	0	0	0	0	0	0	0	0	0	0	0	0	0	0	0
dme-mir-ITS1_34_55_+	34	55	..................................AAATGGTGTATTTTTAATTTC..............	21	AAATGGTGTATTTTTAATTTC		0	0	0	0	0	0	0	0	0	0	0	0	0	0	0	0	0	0	0	0	0	0	0		0	0	0	0	0	0	0	0	0	0	0	0	0	0	0	0	0	0	0
dme-mir-ITS1_34_53_+	34	53	..................................AAATGGTGTATTTTTAATT................	19	AAATGGTGTATTTTTAATT		0	0	0	0	0	0	0	0	0	0	0	0	0	0	0	0	0	0	0	0	0	0	0		0	0	0	0	0	0	0	0	0	0	0	0	0	0	0	0	0	0	0
dme-mir-ITS1_34_52_+	34	52	..................................AAATGGTGTATTTTTAAT.................	18	AAATGGTGTATTTTTAAT		0	0	0	0	0	0	0	0	0	0	0	0	0	0	0	0	0	0	0	0	0	0	0		0	0	0	0	1	0	0	0	0	0	0	0	0	0	0	0	0	0	0
dme-mir-ITS1_35_65_+	35	65	...................................AATGGTGTATTTTTAATTTCTTTCAATAAA....	30	AATGGTGTATTTTTAATTTCTTTCAATAAA		0	0	0	0	0	0	0	0	0	0	0	0	0	0	0	0	0	0	0	0	0	0	0		0	0	0	0	0	0	0	0	0	0	0	0	0	0	0	0	0	0	0
dme-mir-ITS1_35_57_+	35	57	...................................AATGGTGTATTTTTAATTTCTT............	22	AATGGTGTATTTTTAATTTCTT		0	0	0	0	0	0	0	0	0	0	0	0	0	0	0	0	0	0	0	0	0	0	0		0	0	0	0	0	0	0	0	0	0	0	0	0	0	0	0	0	0	0
dme-mir-ITS1_36_60_+	36	60	....................................ATGGTGTATTTTTAATTTCTTTCA.........	24	ATGGTGTATTTTTAATTTCTTTCA		0	0	0	0	0	0	0	0	0	0	0	0	0	0	1	0	0	0	0	0	0	0	0		0	0	0	0	0	0	0	0	0	0	0	0	0	0	0	0	0	0	0
dme-mir-ITS1_37_66_+	37	66	.....................................TGGTGTATTTTTAATTTCTTTCAATAAAA...	29	TGGTGTATTTTTAATTTCTTTCAATAAAA		0	0	0	0	0	0	0	0	0	0	0	0	0	0	0	0	0	0	0	0	0	0	0		0	0	0	0	0	0	0	0	0	0	0	0	0	0	0	0	0	0	0
dme-mir-ITS1_37_55_+	37	55	.....................................TGGTGTATTTTTAATTTC..............	18	TGGTGTATTTTTAATTTC		0	0	0	0	0	0	0	0	0	0	0	0	0	0	0	0	0	0	0	0	0	0	0		0	0	0	0	0	0	0	0	0	0	0	0	0	0	0	0	0	0	0
dme-mir-ITS1_38_67_+	38	67	......................................GGTGTATTTTTAATTTCTTTCAATAAAAA..	29	GGTGTATTTTTAATTTCTTTCAATAAAAA		0	0	0	0	0	0	0	0	0	0	0	0	0	0	0	0	0	0	0	0	0	0	0		0	0	0	0	0	0	0	0	0	0	0	0	0	0	0	0	0	0	0
dme-mir-ITS1_39_67_+	39	67	.......................................GTGTATTTTTAATTTCTTTCAATAAAAA..	28	GTGTATTTTTAATTTCTTTCAATAAAAA		0	0	0	0	0	0	0	0	0	0	0	0	0	0	0	0	0	0	0	1	0	0	0		0	0	0	0	0	0	0	0	0	0	0	0	0	0	0	0	0	0	0
dme-mir-ITS1_40_68_+	40	68	........................................TGTATTTTTAATTTCTTTCAATAAAAAC.	28	TGTATTTTTAATTTCTTTCAATAAAAAC		0	0	0	0	0	0	0	0	0	0	0	0	0	0	0	0	0	0	0	0	0	0	0		0	0	0	0	0	0	0	0	0	0	0	0	0	0	0	0	0	0	0
dme-mir-ITS1_42_69_+	42	69	..........................................TATTTTTAATTTCTTTCAATAAAAACA	27	TATTTTTAATTTCTTTCAATAAAAACA		0	0	0	0	0	0	0	0	0	0	0	0	0	0	0	0	0	0	0	0	0	0	0		0	0	0	0	0	0	0	0	0	0	0	0	0	0	0	0	0	0	0
dme-mir-ITS1_42_68_+	42	68	..........................................TATTTTTAATTTCTTTCAATAAAAAC.	26	TATTTTTAATTTCTTTCAATAAAAAC		0	0	0	0	0	0	0	0	0	0	0	0	0	0	0	0	0	0	0	0	0	0	0		0	0	0	0	0	0	0	0	0	0	0	0	0	0	0	0	0	0	0
dme-mir-ITS1_44_68_+	44	68	............................................TTTTTAATTTCTTTCAATAAAAAC.	24	TTTTTAATTTCTTTCAATAAAAAC		0	0	0	0	0	0	0	0	0	0	0	0	0	0	0	0	0	0	0	0	0	0	0		0	0	0	0	0	0	0	0	0	0	0	0	0	0	0	0	0	0	0
dme-mir-ITS1_44_62_+	44	62	............................................TTTTTAATTTCTTTCAAT.......	18	TTTTTAATTTCTTTCAAT		0	0	0	0	0	0	0	0	0	0	0	0	0	0	0	0	0	0	0	0	0	0	0		0	0	0	0	0	0	0	0	0	0	0	0	0	0	0	0	0	0	0
dme-mir-ITS1_45_64_+	45	64	.............................................TTTTAATTTCTTTCAATAA.....	19	TTTTAATTTCTTTCAATAA		0	0	0	0	0	0	0	0	0	0	0	0	0	0	0	0	0	0	0	0	0	0	0		0	0	0	0	0	0	0	0	0	0	0	0	0	0	0	0	0	0	0
dme-mir-ITS1_48_68_+	48	68	................................................TAATTTCTTTCAATAAAAAC.	20	TAATTTCTTTCAATAAAAAC		0	0	0	0	0	0	0	0	0	0	0	0	0	0	0	0	0	0	0	0	0	0	0		0	0	0	0	0	0	0	0	0	0	0	0	0	0	0	0	0	0	0
dme-mir-ITS1_0_29_+	0	29	ATACATTTATTGAAGGAATTGATATATGC........................................	29	ATACATTTATTGAAGGAATTGATATATGC		0	0	0	0	0	0	0	0	0	0	0	0	0	0	0	0	0	0	0	0	0	0	0		0	0	0	0	0	0	0	0	0	0	0	0	0	0	0	0	0	0	0
dme-mir-ITS1_0_28_+	0	28	ATACATTTATTGAAGGAATTGATATATG.........................................	28	ATACATTTATTGAAGGAATTGATATATG		0	0	0	0	0	0	0	0	0	0	0	0	0	0	0	0	0	0	0	0	0	0	0		0	0	0	0	0	0	0	0	0	0	0	0	0	0	0	0	0	0	0
dme-mir-ITS1_0_18_+	0	18	ATACATTTATTGAAGGAA...................................................	18	ATACATTTATTGAAGGAA		0	0	0	0	0	0	0	0	0	0	0	0	0	0	0	0	0	0	0	0	0	0	0		0	0	0	0	0	0	0	0	0	0	0	0	0	0	0	0	0	0	0
dme-mir-ITS1_13_41_+	13	41	.............AGGAATTGATATATGCCAGTAAAATGGT............................	28	AGGAATTGATATATGCCAGTAAAATGGT		0	0	0	0	0	0	0	0	0	0	0	0	0	0	0	0	0	0	0	0	0	0	0		0	0	0	0	0	0	0	0	0	0	0	0	0	0	0	0	0	0	0
dme-mir-ITS1_13_40_+	13	40	.............AGGAATTGATATATGCCAGTAAAATGG.............................	27	AGGAATTGATATATGCCAGTAAAATGG		0	0	0	0	0	0	0	0	0	0	0	0	0	0	0	0	0	0	0	0	0	0	0		0	0	0	0	0	0	0	0	0	0	0	0	0	0	0	0	0	0	0
dme-mir-ITS1_13_38_+	13	38	.............AGGAATTGATATATGCCAGTAAAAT...............................	25	AGGAATTGATATATGCCAGTAAAAT		0	0	0	0	0	0	0	0	0	0	0	0	0	0	0	0	0	0	0	0	0	0	0		0	0	0	0	0	0	0	0	0	0	0	0	0	0	0	0	0	0	0
dme-mir-ITS1_13_35_+	13	35	.............AGGAATTGATATATGCCAGTAA..................................	22	AGGAATTGATATATGCCAGTAA		0	0	0	0	0	0	0	0	0	0	0	0	0	0	0	0	0	0	0	0	0	0	0		0	0	0	0	0	0	0	0	0	0	0	0	0	0	0	0	0	0	0
dme-mir-ITS1_14_42_+	14	42	..............GGAATTGATATATGCCAGTAAAATGGTG...........................	28	GGAATTGATATATGCCAGTAAAATGGTG		0	0	0	0	0	0	0	0	0	0	0	0	0	0	0	0	0	0	0	0	0	0	0		0	0	0	0	0	0	0	0	0	0	0	0	0	0	0	0	0	0	0
dme-mir-ITS1_14_41_+	14	41	..............GGAATTGATATATGCCAGTAAAATGGT............................	27	GGAATTGATATATGCCAGTAAAATGGT		0	0	0	0	0	0	0	0	0	0	0	0	0	0	0	0	0	0	0	0	0	0	0		0	0	0	0	0	0	0	0	0	0	0	0	0	0	0	0	0	0	0
dme-mir-ITS1_15_43_+	15	43	...............GAATTGATATATGCCAGTAAAATGGTGT..........................	28	GAATTGATATATGCCAGTAAAATGGTGT		0	0	0	0	0	0	0	0	0	0	0	0	0	0	0	0	0	0	0	0	0	0	0		0	0	0	0	0	0	0	0	0	0	0	0	0	0	0	0	0	0	0
dme-mir-ITS1_15_35_+	15	35	...............GAATTGATATATGCCAGTAA..................................	20	GAATTGATATATGCCAGTAA		0	0	0	0	0	0	0	0	0	0	0	0	0	0	0	0	0	0	0	0	0	0	0		0	0	0	0	0	0	0	0	0	0	0	0	0	0	0	0	0	0	0
dme-mir-ITS1_16_45_+	16	45	................AATTGATATATGCCAGTAAAATGGTGTAT........................	29	AATTGATATATGCCAGTAAAATGGTGTAT		0	0	0	0	0	0	0	0	0	0	0	0	0	0	0	0	0	0	0	0	0	0	0		0	0	0	0	0	0	0	0	0	0	0	0	0	0	0	0	0	0	0
dme-mir-ITS1_16_44_+	16	44	................AATTGATATATGCCAGTAAAATGGTGTA.........................	28	AATTGATATATGCCAGTAAAATGGTGTA		0	0	0	0	0	0	0	0	0	0	0	0	0	0	0	0	0	0	0	0	0	0	0		0	0	0	0	0	0	0	0	0	0	0	0	0	0	0	0	0	0	0
dme-mir-ITS1_16_41_+	16	41	................AATTGATATATGCCAGTAAAATGGT............................	25	AATTGATATATGCCAGTAAAATGGT		0	0	0	0	0	0	0	0	0	0	0	0	0	0	0	0	0	0	0	0	0	0	0		0	0	0	0	0	0	0	0	0	0	0	0	0	0	0	0	0	0	0
dme-mir-ITS1_16_36_+	16	36	................AATTGATATATGCCAGTAAA.................................	20	AATTGATATATGCCAGTAAA		0	0	0	0	0	0	0	0	0	0	0	0	0	0	0	0	0	0	0	0	0	0	0		0	0	0	0	0	0	0	0	0	0	0	0	0	0	0	0	0	0	0
dme-mir-ITS1_17_45_+	17	45	.................ATTGATATATGCCAGTAAAATGGTGTAT........................	28	ATTGATATATGCCAGTAAAATGGTGTAT		0	0	0	0	0	0	0	0	0	0	0	0	0	0	0	0	0	0	0	0	0	0	0		0	0	0	0	0	0	0	0	0	0	0	0	0	0	0	0	0	0	0
dme-mir-ITS1_17_43_+	17	43	.................ATTGATATATGCCAGTAAAATGGTGT..........................	26	ATTGATATATGCCAGTAAAATGGTGT		0	0	0	0	0	0	0	0	0	0	0	0	0	0	0	0	0	0	0	0	0	0	0		0	0	0	0	0	0	0	0	0	0	0	0	0	0	0	0	0	0	0
dme-mir-ITS1_17_40_+	17	40	.................ATTGATATATGCCAGTAAAATGG.............................	23	ATTGATATATGCCAGTAAAATGG		0	0	0	0	0	0	0	0	0	0	0	0	0	0	0	0	0	0	0	0	0	0	0		0	0	0	0	0	0	0	0	0	0	0	0	0	0	0	0	0	0	0
dme-mir-ITS1_17_37_+	17	37	.................ATTGATATATGCCAGTAAAA................................	20	ATTGATATATGCCAGTAAAA		0	0	0	0	0	0	0	0	0	0	0	0	0	0	0	0	0	0	0	0	0	0	0		0	0	0	0	0	0	0	0	0	0	0	0	0	0	0	0	0	0	0
dme-mir-ITS1_18_40_+	18	40	..................TTGATATATGCCAGTAAAATGG.............................	22	TTGATATATGCCAGTAAAATGG		0	0	0	0	0	0	0	0	0	0	0	0	0	0	0	0	0	0	0	0	0	0	0		0	0	0	0	0	0	0	0	0	0	0	0	0	0	0	0	0	0	0
dme-mir-ITS1_18_37_+	18	37	..................TTGATATATGCCAGTAAAA................................	19	TTGATATATGCCAGTAAAA		0	0	0	0	0	0	0	0	0	0	0	0	0	0	0	0	0	0	0	0	0	0	0		0	0	0	0	0	0	0	0	0	0	0	0	0	0	0	0	0	0	0
dme-mir-ITS1_19_47_+	19	47	...................TGATATATGCCAGTAAAATGGTGTATTT......................	28	TGATATATGCCAGTAAAATGGTGTATTT		0	0	0	0	0	0	0	0	0	0	0	0	0	0	0	0	0	0	0	0	0	0	0		0	0	0	0	0	0	0	0	0	0	0	0	0	0	0	0	0	0	0
dme-mir-ITS1_19_45_+	19	45	...................TGATATATGCCAGTAAAATGGTGTAT........................	26	TGATATATGCCAGTAAAATGGTGTAT		0	0	0	0	0	0	0	0	0	0	0	0	0	0	0	0	0	0	0	0	0	0	0		0	0	0	0	0	0	0	0	0	0	0	0	0	0	0	0	0	0	0
dme-mir-ITS1_19_42_+	19	42	...................TGATATATGCCAGTAAAATGGTG...........................	23	TGATATATGCCAGTAAAATGGTG		0	0	0	0	0	0	0	0	0	0	0	0	0	0	0	0	0	0	0	0	0	0	0		0	0	0	0	0	0	0	0	0	0	0	0	0	0	0	0	0	0	0
dme-mir-ITS1_19_38_+	19	38	...................TGATATATGCCAGTAAAAT...............................	19	TGATATATGCCAGTAAAAT		0	0	0	0	0	0	0	0	0	0	0	0	0	0	0	0	0	0	0	0	0	0	0		0	0	0	0	0	0	0	0	0	0	0	0	0	0	0	0	0	0	0
dme-mir-ITS1_20_48_+	20	48	....................GATATATGCCAGTAAAATGGTGTATTTT.....................	28	GATATATGCCAGTAAAATGGTGTATTTT		0	0	0	0	0	0	0	0	0	0	0	0	0	0	0	0	0	0	0	0	0	0	0		0	0	0	0	0	0	0	0	0	0	0	0	0	0	0	0	0	0	0
dme-mir-ITS1_20_47_+	20	47	....................GATATATGCCAGTAAAATGGTGTATTT......................	27	GATATATGCCAGTAAAATGGTGTATTT		0	0	0	0	0	0	0	0	0	0	0	0	0	0	0	0	0	0	0	0	0	0	0		0	0	0	0	0	0	0	0	0	0	0	0	0	0	0	0	0	0	0
dme-mir-ITS1_20_44_+	20	44	....................GATATATGCCAGTAAAATGGTGTA.........................	24	GATATATGCCAGTAAAATGGTGTA		0	0	0	0	0	0	0	0	0	0	0	0	0	0	0	0	0	0	0	0	0	0	0		0	0	0	0	0	0	0	0	0	0	0	0	0	0	0	0	0	0	0
dme-mir-ITS1_20_42_+	20	42	....................GATATATGCCAGTAAAATGGTG...........................	22	GATATATGCCAGTAAAATGGTG		0	0	0	0	0	0	0	0	0	0	0	0	0	0	0	0	0	0	0	0	0	0	0		0	0	0	0	0	0	0	0	0	0	0	0	0	0	0	0	0	0	0
dme-mir-ITS1_20_41_+	20	41	....................GATATATGCCAGTAAAATGGT............................	21	GATATATGCCAGTAAAATGGT		0	0	0	0	0	0	0	0	0	0	0	0	0	0	0	0	0	0	0	0	0	0	0		0	0	0	0	0	0	0	0	0	0	0	0	0	0	0	0	0	0	0
dme-mir-ITS1_20_40_+	20	40	....................GATATATGCCAGTAAAATGG.............................	20	GATATATGCCAGTAAAATGG		0	0	0	0	0	0	0	0	0	0	0	0	0	0	0	0	0	0	0	0	0	0	0		0	0	0	0	0	0	0	0	0	0	0	0	0	0	0	0	0	0	0
dme-mir-ITS1_21_47_+	21	47	.....................ATATATGCCAGTAAAATGGTGTATTT......................	26	ATATATGCCAGTAAAATGGTGTATTT		0	0	0	0	0	0	0	0	0	0	0	0	0	0	0	0	0	0	0	0	0	0	0		0	0	0	0	0	0	0	0	0	0	0	0	0	0	0	0	0	0	0
dme-mir-ITS1_21_44_+	21	44	.....................ATATATGCCAGTAAAATGGTGTA.........................	23	ATATATGCCAGTAAAATGGTGTA		0	0	0	0	0	0	0	0	0	0	0	0	0	0	0	0	0	0	0	0	0	0	0		0	0	0	0	0	0	0	0	0	0	0	0	0	0	0	0	0	0	0
dme-mir-ITS1_21_42_+	21	42	.....................ATATATGCCAGTAAAATGGTG...........................	21	ATATATGCCAGTAAAATGGTG		0	0	0	0	0	0	0	0	0	0	0	0	0	0	0	0	0	0	0	0	0	0	0		0	0	0	0	0	0	0	0	0	0	0	0	0	0	0	0	0	0	0
dme-mir-ITS1_21_41_+	21	41	.....................ATATATGCCAGTAAAATGGT............................	20	ATATATGCCAGTAAAATGGT		0	0	0	0	0	0	0	0	0	0	0	0	0	0	0	0	0	0	0	0	0	0	0		0	0	0	0	0	0	0	0	0	0	0	0	0	0	0	0	0	0	0
dme-mir-ITS1_21_39_+	21	39	.....................ATATATGCCAGTAAAATG..............................	18	ATATATGCCAGTAAAATG		0	0	0	0	0	0	0	0	0	0	0	0	0	0	0	0	0	0	0	0	0	0	0		0	0	0	0	0	0	0	0	0	0	0	0	0	0	0	0	0	0	0
dme-mir-ITS1_22_42_+	22	42	......................TATATGCCAGTAAAATGGTG...........................	20	TATATGCCAGTAAAATGGTG		0	0	0	0	0	0	0	0	0	0	0	0	0	0	0	0	0	0	0	0	0	0	0		0	0	0	0	0	0	0	0	0	0	0	0	0	0	0	0	0	0	0
dme-mir-ITS1_23_42_+	23	42	.......................ATATGCCAGTAAAATGGTG...........................	19	ATATGCCAGTAAAATGGTG		0	0	0	0	0	0	0	0	0	0	0	0	0	0	0	0	0	0	0	0	0	0	0		0	0	0	0	0	0	0	0	0	0	0	0	0	0	0	0	0	0	0
dme-mir-ITS1_23_41_+	23	41	.......................ATATGCCAGTAAAATGGT............................	18	ATATGCCAGTAAAATGGT		0	0	0	0	0	0	0	0	0	0	0	0	0	0	0	0	0	0	0	0	0	0	0		0	0	0	0	0	0	0	0	0	0	0	0	0	0	0	0	0	0	0
dme-mir-ITS1_24_42_+	24	42	........................TATGCCAGTAAAATGGTG...........................	18	TATGCCAGTAAAATGGTG		0	0	0	0	0	0	0	0	0	0	0	0	0	0	0	0	0	0	0	0	0	0	0		0	0	0	0	0	0	0	0	0	0	0	0	0	0	0	0	0	0	0
dme-mir-ITS1_28_55_+	28	55	............................CCAGTAAAATGGTGTATTTTTAATTTC..............	27	CCAGTAAAATGGTGTATTTTTAATTTC		0	0	0	0	0	0	0	0	0	0	0	0	0	0	0	0	0	0	0	0	0	0	0		0	0	0	0	0	0	0	0	0	0	0	0	0	0	0	0	0	0	0
dme-mir-ITS1_28_46_+	28	46	............................CCAGTAAAATGGTGTATT.......................	18	CCAGTAAAATGGTGTATT		0	0	0	0	0	0	0	0	0	0	0	0	0	0	0	0	0	0	0	0	0	0	0		0	0	0	0	0	0	0	0	0	0	0	0	0	0	0	0	0	0	0
dme-mir-ITS1_29_58_+	29	58	.............................CAGTAAAATGGTGTATTTTTAATTTCTTT...........	29	CAGTAAAATGGTGTATTTTTAATTTCTTT		0	0	0	0	0	0	0	0	0	0	0	0	0	0	0	0	0	0	0	0	0	0	0		0	0	0	0	0	0	0	0	0	0	0	0	0	0	0	0	0	0	0
dme-mir-ITS1_29_50_+	29	50	.............................CAGTAAAATGGTGTATTTTTA...................	21	CAGTAAAATGGTGTATTTTTA		0	0	0	0	0	0	0	0	0	0	0	0	0	0	0	0	0	0	0	0	0	0	0		0	0	0	0	0	0	0	0	0	0	0	0	0	0	0	0	0	0	0
dme-mir-ITS1_30_58_+	30	58	..............................AGTAAAATGGTGTATTTTTAATTTCTTT...........	28	AGTAAAATGGTGTATTTTTAATTTCTTT		0	0	0	0	0	0	0	0	0	0	0	0	0	0	0	0	0	0	0	0	0	0	0		0	0	0	0	0	0	0	0	0	0	0	0	0	0	0	0	0	0	0
dme-mir-ITS1_30_57_+	30	57	..............................AGTAAAATGGTGTATTTTTAATTTCTT............	27	AGTAAAATGGTGTATTTTTAATTTCTT		0	0	0	0	0	0	0	0	0	0	0	0	0	0	0	0	0	0	0	0	0	0	0		0	0	0	0	0	0	0	0	0	0	0	0	0	0	0	0	0	0	0
dme-mir-ITS1_31_59_+	31	59	...............................GTAAAATGGTGTATTTTTAATTTCTTTC..........	28	GTAAAATGGTGTATTTTTAATTTCTTTC		0	0	0	0	0	0	0	0	0	0	0	0	0	0	0	0	0	0	0	0	0	0	0		0	0	0	0	0	0	0	0	0	0	0	0	0	0	0	0	0	0	0
dme-mir-ITS1_31_58_+	31	58	...............................GTAAAATGGTGTATTTTTAATTTCTTT...........	27	GTAAAATGGTGTATTTTTAATTTCTTT		0	0	0	0	0	0	0	0	0	0	0	0	0	0	0	0	0	0	0	0	0	0	0		0	0	0	0	0	0	0	0	0	0	0	0	0	0	0	0	0	0	0
dme-mir-ITS1_31_56_+	31	56	...............................GTAAAATGGTGTATTTTTAATTTCT.............	25	GTAAAATGGTGTATTTTTAATTTCT		0	0	0	0	0	0	0	0	0	0	0	0	0	0	0	0	0	0	0	0	0	0	0		0	0	0	0	0	0	0	0	0	0	0	0	0	0	0	0	0	0	0
dme-mir-ITS1_32_51_+	32	51	................................TAAAATGGTGTATTTTTAA..................	19	TAAAATGGTGTATTTTTAA		0	0	0	0	0	0	0	0	0	0	0	0	0	0	0	0	0	0	0	0	0	0	0		0	0	0	0	0	0	0	0	0	0	0	0	0	0	0	0	0	0	0
dme-mir-ITS1_33_63_+	33	63	.................................AAAATGGTGTATTTTTAATTTCTTTCAATA......	30	AAAATGGTGTATTTTTAATTTCTTTCAATA		0	0	0	0	0	0	0	0	0	0	0	0	0	0	0	0	0	0	0	0	0	0	0		0	0	0	0	0	0	0	0	0	0	0	0	0	0	0	0	0	0	0
dme-mir-ITS1_33_62_+	33	62	.................................AAAATGGTGTATTTTTAATTTCTTTCAAT.......	29	AAAATGGTGTATTTTTAATTTCTTTCAAT		0	0	0	0	0	0	0	0	0	0	0	0	0	0	0	0	0	0	0	0	0	0	0		0	0	0	0	0	0	0	0	0	0	0	0	0	0	0	0	0	0	0
dme-mir-ITS1_33_55_+	33	55	.................................AAAATGGTGTATTTTTAATTTC..............	22	AAAATGGTGTATTTTTAATTTC		0	0	0	0	0	0	0	0	0	0	0	0	0	0	0	0	0	0	0	0	0	0	0		0	0	0	0	0	0	0	0	0	0	0	0	0	0	0	0	0	0	0
dme-mir-ITS1_34_63_+	34	63	..................................AAATGGTGTATTTTTAATTTCTTTCAATA......	29	AAATGGTGTATTTTTAATTTCTTTCAATA		0	0	0	0	0	0	0	0	0	0	0	0	0	0	0	0	0	0	0	0	0	0	0		0	0	0	0	0	0	0	0	0	0	0	0	0	0	0	0	0	0	0
dme-mir-ITS1_34_62_+	34	62	..................................AAATGGTGTATTTTTAATTTCTTTCAAT.......	28	AAATGGTGTATTTTTAATTTCTTTCAAT		0	0	0	0	0	0	0	0	0	0	0	0	0	0	0	0	0	0	0	0	0	0	0		0	0	0	0	0	0	0	0	0	0	0	0	0	0	0	0	0	0	0
dme-mir-ITS1_34_57_+	34	57	..................................AAATGGTGTATTTTTAATTTCTT............	23	AAATGGTGTATTTTTAATTTCTT		0	0	0	0	0	0	0	0	0	0	0	0	0	0	0	0	0	0	0	0	0	0	0		0	0	0	0	0	0	0	0	0	0	0	0	0	0	0	0	0	0	0
dme-mir-ITS1_35_64_+	35	64	...................................AATGGTGTATTTTTAATTTCTTTCAATAA.....	29	AATGGTGTATTTTTAATTTCTTTCAATAA		0	0	0	0	0	0	0	0	0	0	0	0	0	0	0	0	0	0	0	0	0	0	0		0	0	0	0	0	0	0	0	0	0	0	0	0	0	0	0	0	0	0
dme-mir-ITS1_35_58_+	35	58	...................................AATGGTGTATTTTTAATTTCTTT...........	23	AATGGTGTATTTTTAATTTCTTT		0	0	0	0	0	0	0	0	0	0	0	0	0	0	0	0	0	0	0	0	0	0	0		0	0	0	0	0	0	0	0	0	0	0	0	0	0	0	0	0	0	0
dme-mir-ITS1_35_55_+	35	55	...................................AATGGTGTATTTTTAATTTC..............	20	AATGGTGTATTTTTAATTTC		0	0	0	0	0	0	0	0	0	0	0	0	0	0	0	0	0	0	0	0	0	0	0		0	0	0	0	0	0	0	0	0	0	0	0	0	0	0	0	0	0	0
dme-mir-ITS1_35_54_+	35	54	...................................AATGGTGTATTTTTAATTT...............	19	AATGGTGTATTTTTAATTT		0	0	0	0	0	0	0	0	0	0	0	0	0	0	0	0	0	0	0	0	0	0	0		0	0	0	0	0	0	0	0	0	0	0	0	0	0	0	0	0	0	0
dme-mir-ITS1_35_53_+	35	53	...................................AATGGTGTATTTTTAATT................	18	AATGGTGTATTTTTAATT		0	0	0	0	0	0	0	0	0	0	0	0	0	0	0	0	0	0	0	0	0	0	0		0	0	0	0	0	0	0	0	0	0	0	0	0	0	0	0	0	0	0
dme-mir-ITS1_36_65_+	36	65	....................................ATGGTGTATTTTTAATTTCTTTCAATAAA....	29	ATGGTGTATTTTTAATTTCTTTCAATAAA		0	0	0	0	0	0	0	0	0	0	0	0	0	0	0	0	0	0	0	0	0	0	0		0	0	0	0	0	0	0	0	0	0	0	0	0	0	0	0	0	0	0
dme-mir-ITS1_38_59_+	38	59	......................................GGTGTATTTTTAATTTCTTTC..........	21	GGTGTATTTTTAATTTCTTTC		0	0	0	0	0	0	0	0	0	0	0	0	0	0	0	0	0	0	0	0	0	0	0		0	0	0	0	0	0	0	0	0	0	0	0	0	0	0	0	0	0	0
dme-mir-ITS1_38_57_+	38	57	......................................GGTGTATTTTTAATTTCTT............	19	GGTGTATTTTTAATTTCTT		0	0	0	0	0	0	0	0	0	0	0	0	0	0	0	0	0	0	0	0	0	0	0		0	0	0	0	0	0	0	0	0	0	0	0	0	0	0	0	0	0	0
dme-mir-ITS1_39_60_+	39	60	.......................................GTGTATTTTTAATTTCTTTCA.........	21	GTGTATTTTTAATTTCTTTCA		0	0	0	0	0	0	0	0	0	0	0	0	0	0	0	0	0	0	0	0	0	0	0		0	0	0	0	0	0	0	0	0	0	0	0	0	0	0	0	0	0	0
dme-mir-ITS1_39_58_+	39	58	.......................................GTGTATTTTTAATTTCTTT...........	19	GTGTATTTTTAATTTCTTT		0	0	0	0	0	0	0	0	0	0	0	0	0	0	0	0	0	0	0	0	0	0	0		0	0	0	0	0	0	0	0	0	0	0	0	0	0	0	0	0	0	0
dme-mir-ITS1_41_68_+	41	68	.........................................GTATTTTTAATTTCTTTCAATAAAAAC.	27	GTATTTTTAATTTCTTTCAATAAAAAC		0	0	0	0	0	0	0	0	0	0	0	0	0	0	0	0	0	0	0	0	0	0	0		0	0	0	0	0	0	0	0	0	0	0	0	0	0	0	0	0	0	0
dme-mir-ITS1_42_67_+	42	67	..........................................TATTTTTAATTTCTTTCAATAAAAA..	25	TATTTTTAATTTCTTTCAATAAAAA		0	0	0	0	0	0	0	0	0	0	0	0	0	0	0	0	0	0	0	0	0	0	0		0	0	0	0	0	0	0	0	0	0	0	0	0	0	0	0	0	0	0
dme-mir-ITS1_43_69_+	43	69	...........................................ATTTTTAATTTCTTTCAATAAAAACA	26	ATTTTTAATTTCTTTCAATAAAAACA		0	0	0	0	0	0	0	0	0	0	0	0	0	0	0	0	0	0	0	0	0	0	0		0	0	0	0	0	0	0	0	0	0	0	0	0	0	0	0	0	0	0
dme-mir-ITS1_43_67_+	43	67	...........................................ATTTTTAATTTCTTTCAATAAAAA..	24	ATTTTTAATTTCTTTCAATAAAAA		0	0	0	0	0	0	0	0	0	0	0	0	0	0	0	0	0	0	0	0	0	0	0		0	0	0	0	0	0	0	0	0	0	0	0	0	0	0	0	0	0	0
dme-mir-ITS1_43_61_+	43	61	...........................................ATTTTTAATTTCTTTCAA........	18	ATTTTTAATTTCTTTCAA		0	0	0	0	0	0	0	0	0	0	0	0	0	0	0	0	0	0	0	0	0	0	0		0	0	0	0	0	0	0	0	0	0	0	0	0	0	0	0	0	0	0
dme-mir-ITS1_44_69_+	44	69	............................................TTTTTAATTTCTTTCAATAAAAACA	25	TTTTTAATTTCTTTCAATAAAAACA		0	0	0	0	0	0	0	0	0	0	0	0	0	0	0	0	0	0	0	0	0	0	0		0	0	0	0	0	0	0	0	0	0	0	0	0	0	0	0	0	0	0
dme-mir-ITS1_44_67_+	44	67	............................................TTTTTAATTTCTTTCAATAAAAA..	23	TTTTTAATTTCTTTCAATAAAAA		0	0	0	0	0	0	0	0	0	0	0	0	0	0	0	0	0	0	0	0	0	0	0		0	0	0	0	0	0	0	0	0	0	0	0	0	0	0	0	0	0	0
dme-mir-ITS1_44_66_+	44	66	............................................TTTTTAATTTCTTTCAATAAAA...	22	TTTTTAATTTCTTTCAATAAAA		0	0	0	0	0	0	0	0	0	0	0	0	0	0	0	0	0	0	0	0	0	0	0		0	0	0	0	0	0	0	0	0	0	0	0	0	0	0	0	0	0	0
dme-mir-ITS1_45_69_+	45	69	.............................................TTTTAATTTCTTTCAATAAAAACA	24	TTTTAATTTCTTTCAATAAAAACA		0	0	0	0	0	0	0	0	0	0	0	0	0	0	0	0	0	0	0	0	0	0	0		0	0	0	0	0	0	0	0	0	0	0	0	0	0	0	0	0	0	0
dme-mir-ITS1_45_68_+	45	68	.............................................TTTTAATTTCTTTCAATAAAAAC.	23	TTTTAATTTCTTTCAATAAAAAC		0	0	0	0	0	0	0	0	0	0	0	0	0	0	0	0	0	0	0	0	0	0	0		0	0	0	0	0	0	0	0	0	0	0	0	0	0	0	0	0	0	0
dme-mir-ITS1_46_68_+	46	68	..............................................TTTAATTTCTTTCAATAAAAAC.	22	TTTAATTTCTTTCAATAAAAAC		0	0	0	0	0	0	0	0	0	0	0	0	0	0	0	0	0	0	0	0	0	0	0		0	0	0	0	0	0	0	0	0	0	0	0	0	0	0	0	0	0	0
dme-mir-ITS1_46_64_+	46	64	..............................................TTTAATTTCTTTCAATAA.....	18	TTTAATTTCTTTCAATAA		0	0	0	0	0	0	0	0	0	0	0	0	0	0	0	0	0	0	0	0	0	0	0		0	0	0	0	0	0	0	0	0	0	0	0	0	0	0	0	0	0	0
dme-mir-ITS1_47_68_+	47	68	...............................................TTAATTTCTTTCAATAAAAAC.	21	TTAATTTCTTTCAATAAAAAC		0	0	0	0	0	0	0	0	0	0	0	0	0	0	0	0	0	0	0	0	0	0	0		0	0	0	0	0	0	0	0	0	0	0	0	0	0	0	0	0	0	0
dme-mir-ITS1_47_67_+	47	67	...............................................TTAATTTCTTTCAATAAAAA..	20	TTAATTTCTTTCAATAAAAA		0	0	0	0	0	0	0	0	0	0	0	0	0	0	0	0	0	0	0	0	0	0	0		0	0	0	0	0	0	0	0	0	0	0	0	0	0	0	0	0	0	0
dme-mir-ITS1_48_69_+	48	69	................................................TAATTTCTTTCAATAAAAACA	21	TAATTTCTTTCAATAAAAACA		0	0	0	0	0	0	0	0	0	0	0	0	0	0	0	0	0	0	0	0	0	0	0		0	0	0	0	0	0	0	0	0	0	0	0	0	0	0	0	0	0	0
dme-mir-ITS1_49_69_+	49	69	.................................................AATTTCTTTCAATAAAAACA	20	AATTTCTTTCAATAAAAACA		0	0	0	0	0	0	0	0	0	0	0	0	0	0	0	0	0	0	0	0	0	0	0		0	0	0	0	0	0	0	0	0	0	0	0	0	0	0	0	0	0	0
dme-mir-ITS1_49_68_+	49	68	.................................................AATTTCTTTCAATAAAAAC.	19	AATTTCTTTCAATAAAAAC		0	0	0	0	0	0	0	0	0	0	0	0	0	0	0	0	0	0	0	0	0	0	0		0	0	0	0	0	0	0	0	0	0	0	0	0	0	0	0	0	0	0
dme-mir-ITS1_49_67_+	49	67	.................................................AATTTCTTTCAATAAAAA..	18	AATTTCTTTCAATAAAAA		0	0	0	0	0	0	0	0	0	0	0	0	0	0	0	0	0	0	0	0	0	0	0		0	0	0	0	0	0	0	0	0	0	0	0	0	0	0	0	0	0	0
dme-mir-ITS1_50_68_+	50	68	..................................................ATTTCTTTCAATAAAAAC.	18	ATTTCTTTCAATAAAAAC		0	0	0	0	0	0	0	0	0	0	0	0	0	0	0	0	0	0	0	0	0	0	0		0	0	0	0	0	0	0	0	0	0	0	0	0	0	0	0	0	0	0
dme-mir-ITS1_51_69_+	51	69	...................................................TTTCTTTCAATAAAAACA	18	TTTCTTTCAATAAAAACA		0	0	0	0	0	0	0	0	0	0	0	0	0	0	0	0	0	0	0	0	0	0	0		0	0	0	0	0	0	0	0	0	0	0	0	0	0	0	0	0	0	0
[truncated: 43 more columns]

## Sheet: 2-normalized
key	start0based	stop1based	dme-mir-ITS1 hairpin	sequencelength	sequence	tissues and organs	V063V0632...combined V063 and V0632.CS,ovary,AGO1IP	V064V0642...combined V064 and V0642.ago2[414], ovary, AGO1IP	V065V0652...combined V065 and V0652.dcr-2[L811fsX], ovary, AGO1IP	V066V0662...combined V066 and V0662.r2d2[1], ovary, AGO1IP	V097.SRR069232.GSM609246..CS ovary	V0892.SRR073602.GSM628272.resequenced of V089.ago2[414] ovary total RNA Â	V098.SRR069233.GSM609245..dcr-2[L811fsX] ovary	V0882.SRR073601.GSM628271.resequenced of V088.r2d2[1] ovary total RNA Â	SRR068998.S2.head female	SRR013604.S22.head female	SRR016854.S24.male body	SRR018039.S23.female body	SRR069835.S1.head male	SRR069836.S3.male body	SRR069837.S4.female body	SRR069236.V090.male body	SRR069832.S5.Imaginal disc	SRR016853.S21.imaginal disc brain	SRR031692..head	SRR031696..AGO1IP head	SRR032152..AGO1IP head	SRR060644..ovary A2	SRR060647..AGO2 IP ovary A2	Cell lines	V094....FLAG-IP from S2-R+, FLAG-HA-AGO2	V095....AGO1-IP from S2-R+, FLAG-HA-AGO2	SRR013547.V020, SRR013548.V025 combined.cell line S2R+	SRR1015573..GFP knockdown, AGO1IP, S2R+	SRR1015574..dcr1 knockdown, AGO1IP, S2R+	SRR069830.S15.cell line S2-GMR	SRR013618.S30.cell line S2-GMR	SRR069831.S16.cell line KC	SRR016855.S33.cell line KC	SRR029028..cell line S2-NP mock	SRR029029..dcr1 knocdown S2-NP	SRR029030..dcr2 knockdown S2-NP	SRR029031..loqs knockdown S2-NP	SRR029032..r2d2 knockdown S2-NP	SRR029033..lacZ knockdown S2-NP	SRR032092..cell line S2-NP mock oxidized	SRR032093..ago1 knockdown S2-NP	SRR032094..ago2 knockdown S2-NP	SRR032095..dcr2 knockdown AGO1IP S2-NP
key	start0based	stop1based	ATACATTTATTGAAGGAATTGATATATGCCAGTAAAATGGTGTATTTTTAATTTCTTTCAATAAAAACA	sequencelength	sequence		V063V0632.NormRPMdmestemloopmirbasev20plusITS1	V064V0642.NormRPMdmestemloopmirbasev20plusITS1	V065V0652.NormRPMdmestemloopmirbasev20plusITS1	V066V0662.NormRPMdmestemloopmirbasev20plusITS1	V097.NormRPMdmestemloopmirbasev20plusITS1	V0892.NormRPMdmestemloopmirbasev20plusITS1	V098.NormRPMdmestemloopmirbasev20plusITS1	V0882.NormRPMdmestemloopmirbasev20plusITS1	SRR068998.NormRPMdmestemloopmirbasev20plusITS1	SRR013604.NormRPMdmestemloopmirbasev20plusITS1	SRR016854.NormRPMdmestemloopmirbasev20plusITS1	SRR018039.NormRPMdmestemloopmirbasev20plusITS1	SRR069835.NormRPMdmestemloopmirbasev20plusITS1	SRR069836.NormRPMdmestemloopmirbasev20plusITS1	SRR069837.NormRPMdmestemloopmirbasev20plusITS1	V090.NormRPMdmestemloopmirbasev20plusITS1	SRR069832.NormRPMdmestemloopmirbasev20plusITS1	SRR016853.NormRPMdmestemloopmirbasev20plusITS1	SRR031692.NormRPMdmestemloopmirbasev20plusITS1	SRR031696.NormRPMdmestemloopmirbasev20plusITS1	SRR032152.NormRPMdmestemloopmirbasev20plusITS1	SRR060644.NormRPMdmestemloopmirbasev20plusITS1	SRR060647.NormRPMdmestemloopmirbasev20plusITS1		V094.NormRPMdmestemloopmirbasev20plusITS1	V095.NormRPMdmestemloopmirbasev20plusITS1	V020V025.NormRPMdmestemloopmirbasev20plusITS1	SRR1015573.NormRPMdmestemloopmirbasev20plusITS1	SRR1015574.NormRPMdmestemloopmirbasev20plusITS1	SRR069830.NormRPMdmestemloopmirbasev20plusITS1	SRR013618.NormRPMdmestemloopmirbasev20plusITS1	SRR069831.NormRPMdmestemloopmirbasev20plusITS1	SRR016855.NormRPMdmestemloopmirbasev20plusITS1	SRR029028.NormRPMdmestemloopmirbasev20plusITS1	SRR029029.NormRPMdmestemloopmirbasev20plusITS1	SRR029030.NormRPMdmestemloopmirbasev20plusITS1	SRR029031.NormRPMdmestemloopmirbasev20plusITS1	SRR029032.NormRPMdmestemloopmirbasev20plusITS1	SRR029033.NormRPMdmestemloopmirbasev20plusITS1	SRR032092.NormRPMdmestemloopmirbasev20plusITS1	SRR032093.NormRPMdmestemloopmirbasev20plusITS1	SRR032094.NormRPMdmestemloopmirbasev20plusITS1	SRR032095.NormRPMdmestemloopmirbasev20plusITS1
dme-mir-ITS1_7_29_+	7	29	.......TATTGAAGGAATTGATATATGC........................................	22	TATTGAAGGAATTGATATATGC		1057.42	435.555	1160.23	791.471	2338.66	1994.8	1008.91	1456.9	237.931	127.296	585.456	749.657	68.1876	401.622	1088.27	363.311	747.982	483.689	74.1093	147.008	116.531	1050.2	3609.77		124.231	81.0437	114.081	28.6609	4.9419	184.838	169.497	201.479	172.015	95.7545	5.01	73.105	18.5408	60.5394	124.729	618.465	132.286	88.5134	24.5784
dme-mir-ITS1_9_31_+	9	31	.........TTGAAGGAATTGATATATGCCA......................................	22	TTGAAGGAATTGATATATGCCA		1398.08	636.861	1237.98	713.772	806.6	718.361	402.255	690.206	74.8547	42.8177	161.029	273.751	5.6823	105.187	207.29	60.3946	219.995	192.31	24.4883	53.6826	36.1647	265.59	283.49		3.6538	5.0135	2.3466	2.0916	0.4212	14.703	9.7787	29.1026	42.1671	20.6138	0	27.0171	0.618	0	0	343.591	5.1877	4.0233	0.5229
dme-mir-ITS1_7_28_+	7	28	.......TATTGAAGGAATTGATATATG.........................................	21	TATTGAAGGAATTGATATATG		509.403	286.542	418.855	224.923	1507.21	1010.59	715.055	333.907	141.689	127.296	302.505	303.232	11.3646	248.623	196.926	443.051	307.992	326.344	56.0653	66.0709	40.4341	401.426	349.637		42.2223	51.1007	39.1702	21.8633	3.4818	107.122	71.7101	87.3077	70.2785	79.7955	0	25.4278	30.2833	21.7321	31.1822	0	62.2524	28.1633	18.1287
dme-mir-ITS1_7_30_+	7	30	.......TATTGAAGGAATTGATATATGCC.......................................	23	TATTGAAGGAATTGATATATGCC		290.131	138.333	365.64	330.349	934.784	677.479	409.834	629.3	122.976	48.6039	212.788	442.213	17.0469	162.561	435.31	88.5472	483.988	413.758	51.5543	66.8968	42.1921	148.001	406.335		17.8633	20.5599	20.5779	18.9221	8.7044	94.5195	88.0079	78.3531	92.3661	33.2481	35.07	15.8924	1.2361	3.1046	23.8452	0	46.6893	4.0233	0.3486
dme-mir-ITS1_7_31_+	7	31	.......TATTGAAGGAATTGATATATGCCA......................................	24	TATTGAAGGAATTGATATATGCCA		522.849	202.309	403.153	176.658	683.319	559.05	380.04	297.184	8.0201	8.1006	14.9527	160.039	0	0	124.374	3.6174	58.6652	11.6551	1.2889	16.5177	10.7992	176.384	85.0469		0.812	1.1959	0.361	0.2614	0.6739	0	9.7787	0	42.8364	3.9898	0	7.9462	0	0	0	0	0	26.1517	0
dme-mir-ITS1_9_30_+	9	30	.........TTGAAGGAATTGATATATGCC.......................................	21	TTGAAGGAATTGATATATGCC		318.976	154.227	338.521	245.149	381.811	385.138	168.362	390.782	45.4475	59.019	75.9137	235.847	34.0938	66.937	134.739	48.756	73.3315	116.551	10.9553	26.4283	23.3564	125.699	841.019		12.1795	3.9096	5.9568	10.0003	3.5941	10.5022	15.2112	13.432	28.1114	11.3044	0	17.4816	0.618	20.1798	0	0	18.157	0	1.5688
dme-mir-ITS1_8_30_+	8	30	........ATTGAAGGAATTGATATATGCC.......................................	22	ATTGAAGGAATTGATATATGCC		63.6463	23.9663	71.6488	41.1772	109.398	74.5184	51.5636	118.766	2.6734	3.4717	6.9013	8.4231	0	9.5624	31.0936	4.2465	0	23.3103	3.8666	4.1294	2.7626	8.1096	0		2.0299	1.4259	1.0831	2.7125	0.7581	2.1004	5.4326	2.2387	8.0318	0	0	0	0	0	0	0	0	0	0.1743
dme-mir-ITS1_6_28_+	6	28	......TTATTGAAGGAATTGATATATG.........................................	22	TTATTGAAGGAATTGATATATG		39.2207	19.0026	43.0121	22.0888	102.498	44.2351	47.1056	30.9903	18.7137	9.2579	26.4548	8.4231	17.0469	28.6873	31.0936	42.3077	29.3326	40.793	9.022	11.5624	7.2832	33.4522	9.4497		5.6838	2.6677	1.9856	0.4575	0.0562	10.5022	1.0865	11.1933	3.3466	6.6496	0	0	1.2361	0	0	0	2.5939	0	0.5229
dme-mir-ITS1_9_29_+	9	29	.........TTGAAGGAATTGATATATGC........................................	20	TTGAAGGAATTGATATATGC		61.8319	23.4148	52.0772	20.4851	44.9727	39.6927	24.3701	39.6783	5.3468	6.9434	17.2531	29.4809	11.3646	19.1248	10.3645	12.2676	14.6663	17.4827	3.2221	9.9106	7.5343	41.5618	500.832		4.4658	1.1499	2.1661	1.7321	0.8704	6.3013	1.0865	4.4773	4.6852	5.9847	10.02	3.1785	4.3262	0	0	0	12.9693	0	2.6147
dme-mir-ITS1_8_29_+	8	29	........ATTGAAGGAATTGATATATGC........................................	21	ATTGAAGGAATTGATATATGC		58.1099	20.8075	55.4909	24.6235	72.6546	43.3699	32.3201	47.8289	0	3.4717	11.5021	29.4809	0	19.1248	51.8226	4.2465	14.6663	11.6551	2.5777	3.3035	3.2649	8.1096	292.939		3.2479	1.0119	1.6246	2.6471	0.3931	2.1004	0	2.2387	3.3466	3.9898	0	17.4816	0	0	0	0	5.1877	8.0467	1.3945
dme-mir-ITS1_10_31_+	10	31	..........TGAAGGAATTGATATATGCCA......................................	21	TGAAGGAATTGATATATGCCA		57.8772	34.9968	76.8072	39.7805	35.9948	32.9871	20.7295	25.3475	66.8346	99.5223	74.7635	117.924	22.7292	172.124	103.645	6.6057	95.331	104.896	5.1554	4.1294	6.2786	12.1644	283.49		1.6239	0.23	0.361	0.5883	0.0842	10.5022	2.173	22.3866	16.733	1.3299	0	0	0	0	0	0	2.5939	0	0
dme-mir-ITS1_6_29_+	6	29	......TTATTGAAGGAATTGATATATGC........................................	23	TTATTGAAGGAATTGATATATGC		22.0529	8.8745	38.8019	26.1754	54.5325	38.7193	24.7416	53.6508	10.6935	3.4717	18.4033	21.0578	0	9.5624	20.729	10.6949	29.3326	17.4827	4.511	30.5578	20.3426	21.2877	406.335		21.9231	2.5297	4.6932	0.6863	0.0842	6.3013	7.6056	8.9546	0.6693	3.3248	0	0	1.2361	13.9706	1.8342	0	0	0	0.5229
dme-mir-ITS1_7_27_+	7	27	.......TATTGAAGGAATTGATATAT..........................................	20	TATTGAAGGAATTGATATAT		38.8019	12.4344	27.0817	7.9147	17.4571	12.8704	15.0084	4.9262	58.8144	26.6164	134.574	50.5387	11.3646	162.561	82.9162	24.8498	43.9989	29.1379	74.1093	116.45	91.6674	26.3563	28.349		1.218	4.0016	1.2635	3.0393	0.5897	54.6113	39.1146	73.8757	48.191	53.197	15.03	55.6234	3.7082	68.3008	18.3425	0	7.7816	34.1984	1.9175
dme-mir-ITS1_9_28_+	9	28	.........TTGAAGGAATTGATATATG.........................................	19	TTGAAGGAATTGATATATG		12.0965	7.7214	10.9996	5.5351	22.4448	23.145	12.1108	10.2107	8.0201	1.1572	1.1502	12.6347	0	0	0	7.392	7.3331	5.8276	0	1.6518	0.5023	7.0959	18.8993		1.6239	0.368	1.4441	0.2941	0.0562	0	1.0865	2.2387	4.0159	0.665	0	0	1.2361	0	9.1713	0	0	0	0.1743
dme-mir-ITS1_8_28_+	8	28	........ATTGAAGGAATTGATATATG.........................................	20	ATTGAAGGAATTGATATATG		14.6089	6.7186	10.4685	4.4488	27.6819	13.5193	11.7393	6.3593	0	2.3145	0	0	5.6823	0	0	3.4601	7.3331	11.6551	0.6444	1.6518	0.2511	5.0685	18.8993		0.406	0.6439	0	1.6014	0.365	0	0	0	0	1.9949	0	0	0	0	0	0	2.5939	0	0
dme-mir-ITS1_7_33_+	7	33	.......TATTGAAGGAATTGATATATGCCAGT....................................	26	TATTGAAGGAATTGATATATGCCAGT		4.7456	1.3537	7.1307	2.1727	8.6454	20.8738	3.8636	3.4036	0	0	0	16.8462	0	9.5624	10.3645	2.0446	14.6663	0	0.6444	3.3035	1.758	5.0685	28.349		1.6239	1.9318	0.1805	0.5883	2.4429	2.1004	2.173	2.2387	6.0239	0	0	0	0	0	0	0	7.7816	0	0
dme-mir-ITS1_40_62_+	40	62	........................................TGTATTTTTAATTTCTTTCAAT.......	22	TGTATTTTTAATTTCTTTCAAT		3.3963	0.7019	2.0861	2.7934	0.8313	1.0815	0.8173	1.7018	32.0806	40.5033	40.2573	37.904	17.0469	76.4994	72.5516	0.1573	58.6652	99.0688	85.0645	34.6872	14.8175	9.1233	0		2.8419	0.138	0	7.0263	0.3369	4.2009	8.6921	33.5799	17.4023	2.6599	0	0	0	0	0	0	18.157	0	0
dme-mir-ITS1_8_31_+	8	31	........ATTGAAGGAATTGATATATGCCA......................................	23	ATTGAAGGAATTGATATATGCCA		16.1442	4.9136	10.5065	3.2073	15.9607	6.9219	9.5846	6.001	0	0	1.1502	4.2115	0	9.5624	0	0.1573	0	5.8276	0.6444	0	1.2557	4.0548	0		0	0	0	0.098	0.0842	0	0	0	0.6693	0	0	0	0	0	0	0	0	0	0
dme-mir-ITS1_40_63_+	40	63	........................................TGTATTTTTAATTTCTTTCAATA......	23	TGTATTTTTAATTTCTTTCAATA		1.4888	1.7549	1.593	1.8623	6.1515	0.9734	3.7893	2.9557	8.0201	2.3145	1.1502	4.2115	5.6823	0	31.0936	0.3146	7.3331	23.3103	38.6657	47.0755	25.6167	1.0137	0		12.9915	0.5979	0.1805	10.6866	0.8424	2.1004	0	0	0.6693	0	0	0	0	0	0	0	0	0	0
dme-mir-ITS1_7_26_+	7	26	.......TATTGAAGGAATTGATATA...........................................	19	TATTGAAGGAATTGATATA		3.629	1.1532	3.4516	1.9657	7.3985	1.8386	4.458	6.2697	8.0201	0	16.1029	0	0	19.1248	0	4.2465	0	0	3.8666	1.6518	4.0183	43.5892	47.2483		0.812	0.6899	0	0.5883	0.8424	2.1004	1.0865	6.716	2.008	9.9744	7.515	0	6.1803	0	0	0	0	0	0.1743
dme-mir-ITS1_7_32_+	7	32	.......TATTGAAGGAATTGATATATGCCAG.....................................	25	TATTGAAGGAATTGATATATGCCAG		1.9075	0.6017	1.8206	0.8794	7.8141	20.0086	4.6808	6.7176	0	2.3145	3.4506	33.6924	0	0	31.0936	0.3146	7.3331	34.9654	0.6444	1.6518	0.2511	21.2877	0		0.406	0.092	0.1805	0.2614	0.8424	6.3013	7.6056	2.2387	10.7091	1.9949	0	4.7677	0	0	0	0	10.3754	0	0
dme-mir-ITS1_40_65_+	40	65	........................................TGTATTTTTAATTTCTTTCAATAAA....	25	TGTATTTTTAATTTCTTTCAATAAA		4.0012	1.1532	2.3516	4.5005	1.7457	2.1631	1.7089	1.8809	10.6935	4.6289	17.2531	105.289	0	0	155.468	0	124.664	110.724	19.9773	0.8259	0.2511	1.0137	0		0.406	0.046	0	1.4053	0.1685	6.3013	6.5191	0	8.7012	5.3197	0	11.1247	0	0	0	0	7.7816	0	0
dme-mir-ITS1_10_32_+	10	32	..........TGAAGGAATTGATATATGCCAG.....................................	22	TGAAGGAATTGATATATGCCAG		6.1413	3.8105	8.1548	4.0867	5.4865	3.5691	3.1949	3.1349	8.0201	3.4717	9.2017	16.8462	0	28.6873	31.0936	0.4718	43.9989	29.1379	2.5777	3.3035	0.5023	2.0274	28.349		0	0.046	0	0.0327	0	2.1004	0	4.4773	4.6852	0	0	0	0	0	0	0	0	0	0
dme-mir-ITS1_6_27_+	6	27	......TTATTGAAGGAATTGATATAT..........................................	21	TTATTGAAGGAATTGATATAT		3.2568	1.1031	2.9585	1.1898	3.9071	1.6223	2.6005	0.8061	40.1007	27.7737	25.3046	37.904	17.0469	28.6873	10.3645	4.0892	43.9989	17.4827	31.577	14.0401	11.0503	3.0411	18.8993		0	0.23	0.1805	0.098	0.0842	18.9039	6.5191	6.716	5.3546	3.9898	0	0	0	0	0	0	0	0	0.1743
dme-mir-ITS1_40_64_+	40	64	........................................TGTATTTTTAATTTCTTTCAATAA.....	24	TGTATTTTTAATTTCTTTCAATAA		0.977	0.4011	1.5172	1.914	1.1638	0.2163	1.1888	0.7165	10.6935	6.9434	18.4033	58.9618	0	38.2497	41.4581	0	146.663	87.4136	30.2881	21.473	10.548	0	0		0.406	0	0	1.8301	0.1123	23.1048	7.6056	2.2387	9.3705	0	0	0	0	0	0	0	0	0	0
dme-mir-ITS1_6_32_+	6	32	......TTATTGAAGGAATTGATATATGCCAG.....................................	26	TTATTGAAGGAATTGATATATGCCAG		0.4187	0.0501	0.6448	0.3621	3.5745	9.1931	2.7491	4.7471	0	0	1.1502	8.4231	0	0	10.3645	0.1573	7.3331	34.9654	1.2889	0.8259	0.7534	6.0822	0		0	0	0.5415	0.0327	0.2246	4.2009	8.6921	0	10.7091	3.3248	0	0	0	0	0	0	0	0	0
dme-mir-ITS1_10_35_+	10	35	..........TGAAGGAATTGATATATGCCAGTAA..................................	25	TGAAGGAATTGATATATGCCAGTAA		2.6054	1.2033	3.2619	1.6554	1.912	2.4876	1.3374	1.1644	2.6734	5.7862	4.6008	37.904	0	0	20.729	0	0	11.6551	0.6444	0.8259	0	1.0137	0		0	0	0	0.0327	0	8.4017	3.2595	0	5.3546	0	0	0	0	0	0	0	0	0	0
dme-mir-ITS1_5_29_+	5	29	.....TTTATTGAAGGAATTGATATATGC........................................	24	TTTATTGAAGGAATTGATATATGC		0.4653	0.3008	0.3414	0.5173	2.7433	5.5159	1.486	2.687	0	0	0	8.4231	0	0	31.0936	0.3146	0	0	0.6444	46.2496	20.3426	11.1507	292.939		10.1496	0.138	0	0	0.0562	0	1.0865	0	0	0	0	0	0	0	0	0	0	6.035	0
dme-mir-ITS1_41_62_+	41	62	.........................................GTATTTTTAATTTCTTTCAAT.......	21	GTATTTTTAATTTCTTTCAAT		0.5118	0	0.3414	0.1035	0.0831	0	0.1486	0.1791	8.0201	23.1447	19.5535	12.6347	5.6823	0	10.3645	0	7.3331	11.6551	31.577	6.6071	6.7809	0	0		0.406	0	0	2.6471	0.1404	10.5022	11.9517	15.6706	7.3625	1.3299	0	0	0	0	0	0	0	0	0
dme-mir-ITS1_6_31_+	6	31	......TTATTGAAGGAATTGATATATGCCA......................................	25	TTATTGAAGGAATTGATATATGCCA		1.7214	0.6017	2.3896	0.8277	1.6626	5.4077	1.2631	2.9557	0	0	2.3004	8.4231	0	0	10.3645	0.1573	21.9995	11.6551	0	14.0401	3.7671	5.0685	37.7986		6.9017	0.138	0	0.098	0.2246	0	0	2.2387	2.008	0	0	0	0	0	0	0	0	0	0
dme-mir-ITS1_6_33_+	6	33	......TTATTGAAGGAATTGATATATGCCAGT....................................	27	TTATTGAAGGAATTGATATATGCCAGT		1.2096	0.2006	2.7309	0.4138	1.4963	3.2446	1.1145	0.7165	2.6734	0	0	0	0	0	0	0.6291	0	5.8276	0	3.3035	1.0046	6.0822	75.5972		13.8034	0.5519	0.361	0.3268	0.6177	0	8.6921	0	0.6693	0	0	0	0	0	0	0	0	0	0
dme-mir-ITS1_10_30_+	10	30	..........TGAAGGAATTGATATATGCC.......................................	20	TGAAGGAATTGATATATGCC		2.2797	0.6017	1.593	0.8794	1.6626	0.9734	0.8916	1.1644	0	0	0	0	0	0	0	0.6291	0	5.8276	0	0.8259	0.2511	1.0137	103.946		1.218	0	0.361	0.817	0.6458	0	0	2.2387	0	0.665	0	9.5354	0	0	0	0	0	0	0
dme-mir-ITS1_1_26_+	1	26	.TACATTTATTGAAGGAATTGATATA...........................................	25	TACATTTATTGAAGGAATTGATATA		0.0931	0	0	0	4.9046	7.5708	2.8234	5.1053	0	0	0	8.4231	0	0	10.3645	0	0	5.8276	0.6444	0	0	11.1507	0		0	0	0.1805	0.0327	0.0281	0	0	0	0	1.3299	0	0	0.618	0	0	0	0	0	0
dme-mir-ITS1_32_57_+	32	57	................................TAAAATGGTGTATTTTTAATTTCTT............	25	TAAAATGGTGTATTTTTAATTTCTT		0	0	0	0	0	0	0	0	0	0	0	54.7502	0	0	20.729	0	14.6663	5.8276	0	0	0	0	0		0	0	0	0	0	4.2009	2.173	0	24.0955	0	0	0	0	0	0	0	0	0	0
dme-mir-ITS1_32_58_+	32	58	................................TAAAATGGTGTATTTTTAATTTCTTT...........	26	TAAAATGGTGTATTTTTAATTTCTTT		0	0	0	0	0	0	0	0	0	0	1.1502	21.0578	0	0	62.1871	0	0	5.8276	0	0	0	0	0		0	0	0	0	0	0	0	2.2387	28.1114	0	0	0	0	0	0	0	0	0	0
dme-mir-ITS1_9_33_+	9	33	.........TTGAAGGAATTGATATATGCCAGT....................................	24	TTGAAGGAATTGATATATGCCAGT		1.2096	0.5014	1.6689	0.6725	1.4132	2.7039	0.6687	0.8061	0	1.1572	2.3004	0	0	0	0	0	0	0	0	0	1.2557	1.0137	18.8993		0.406	0.092	0	0.4248	0.6177	4.2009	5.4326	0	0	0	0	0	0	0	0	0	0	0	0
dme-mir-ITS1_10_33_+	10	33	..........TGAAGGAATTGATATATGCCAGT....................................	23	TGAAGGAATTGATATATGCCAGT		1.9075	1.0529	1.4034	0.6208	1.912	1.1897	1.4117	0.8957	2.6734	4.6289	5.751	4.2115	0	9.5624	10.3645	0.4718	0	0	1.2889	0	0.7534	1.0137	9.4497		0	0.046	0	0.0654	0.0562	0	0	2.2387	1.3386	0	0	0	0	0	0	0	0	0	0
dme-mir-ITS1_41_63_+	41	63	.........................................GTATTTTTAATTTCTTTCAATA......	22	GTATTTTTAATTTCTTTCAATA		0.1396	0.0501	0.0759	0.0517	0.665	0.1082	0.6687	0	2.6734	0	1.1502	0	0	0	10.3645	0	7.3331	5.8276	5.1554	6.6071	4.5206	0	0		2.0299	0.184	0.1805	4.4119	0.1966	2.1004	2.173	0	0	0	0	0	0	0	0	0	0	0	0
dme-mir-ITS1_10_34_+	10	34	..........TGAAGGAATTGATATATGCCAGTA...................................	24	TGAAGGAATTGATATATGCCAGTA		1.6284	0.4512	2.2378	1.0346	2.6601	1.5142	0.5201	0.7165	0	8.1006	13.8025	4.2115	0	0	0	0.3146	7.3331	11.6551	0.6444	0	1.0046	0	0		0	0	0	0	0.0281	2.1004	0	2.2387	0.6693	0	0	0	0	0	0	0	0	0	0
dme-mir-ITS1_6_26_+	6	26	......TTATTGAAGGAATTGATATA...........................................	20	TTATTGAAGGAATTGATATA		0.7909	0.4011	0.5689	0.0517	1.4963	0.3245	0.8916	1.0748	8.0201	1.1572	4.6008	0	0	0	10.3645	1.8873	0	0	2.5777	0.8259	1.0046	4.0548	85.0469		0.812	0.046	0.1805	0.2614	0.4212	0	2.173	6.716	0	0	0	0	1.2361	0	16.5082	0	0	0	0
dme-mir-ITS1_5_32_+	5	32	.....TTTATTGAAGGAATTGATATATGCCAG.....................................	27	TTTATTGAAGGAATTGATATATGCCAG		0.4653	0.2006	0.5689	0.2587	0.665	4.9751	1.1145	3.6723	0	0	0	0	0	0	0	0	0	0	0	0	0	0	0		0.406	0	0	0.0654	0.1404	0	1.0865	0	2.6773	0	0	0	0	0	0	0	0	0	0
dme-mir-ITS1_40_61_+	40	61	........................................TGTATTTTTAATTTCTTTCAA........	21	TGTATTTTTAATTTCTTTCAA		0.1861	0.0501	0.1517	0.1552	0	0	0	0	0	4.6289	9.2017	8.4231	5.6823	9.5624	0	0	14.6663	11.6551	14.1774	2.4777	1.5069	0	0		0	0	0	2.0262	0.0281	0	0	6.716	7.3625	0	0	0	0	0	0	0	0	0	0
dme-mir-ITS1_7_25_+	7	25	.......TATTGAAGGAATTGATAT............................................	18	TATTGAAGGAATTGATAT		0.3257	0.1504	0.1896	0.2069	0.2494	0.1082	0.4458	0.1791	0	2.3145	3.4506	4.2115	0	0	10.3645	0.6291	0	0	1.2889	9.0847	7.032	1.0137	56.6979		0.406	0.184	0.1805	0.1307	0.1685	0	0	13.432	2.008	1.3299	0	0	0	0	0	0	7.7816	0	0
dme-mir-ITS1_10_36_+	10	36	..........TGAAGGAATTGATATATGCCAGTAAA.................................	26	TGAAGGAATTGATATATGCCAGTAAA		1.7679	0.4011	1.7068	1.1898	1.8288	1.406	0.8916	0.9852	0	0	0	0	0	0	10.3645	0.3146	0	0	0	0	0	0	0		0	0	0	0	0	0	0	0	2.6773	0	0	0	0	0	0	0	0	0	0
dme-mir-ITS1_4_29_+	4	29	....ATTTATTGAAGGAATTGATATATGC........................................	25	ATTTATTGAAGGAATTGATATATGC		0.2326	0.1003	0.0759	0.0517	1.6626	2.7039	0.743	1.7913	0	0	0	8.4231	0	0	0	0	0	5.8276	0	4.9553	2.2603	1.0137	56.6979		10.5556	0.092	0.1805	0.0327	0.0562	0	0	2.2387	0	0.665	0	0	0.618	0	0	68.7183	2.5939	0	0
dme-mir-ITS1_5_31_+	5	31	.....TTTATTGAAGGAATTGATATATGCCA......................................	26	TTTATTGAAGGAATTGATATATGCCA		0.7444	0.0501	0.531	0.4656	0.4156	1.8386	0.743	2.1496	0	0	0	4.2115	0	0	0	0	0	5.8276	0	10.7365	2.0091	0	28.349		4.8718	0.138	0.1805	0.0327	0.0842	2.1004	1.0865	0	2.008	0	0	3.1785	0	0	0	0	0	0	0
dme-mir-ITS1_6_30_+	6	30	......TTATTGAAGGAATTGATATATGCC.......................................	24	TTATTGAAGGAATTGATATATGCC		0.1396	0	0.0759	0	0.3325	0.2163	0.1486	0.4478	5.3468	1.1572	1.1502	4.2115	5.6823	0	10.3645	0	14.6663	0	0	18.1695	7.032	1.0137	0		4.4658	0	0	0.2288	1.2916	0	0	0	0.6693	0	0	0	0	0	0	0	0	0	0
dme-mir-ITS1_9_37_+	9	37	.........TTGAAGGAATTGATATATGCCAGTAAAA................................	28	TTGAAGGAATTGATATATGCCAGTAAAA		0.1396	0	0.0379	0	0.1663	10.2747	0.2229	2.7766	0	0	0	0	0	0	0	0	0	0	0	0	0	0	0		0	0	0	0	0	0	0	0	0	0	0	0	0	0	0	0	0	0	0
dme-mir-ITS1_10_29_+	10	29	..........TGAAGGAATTGATATATGC........................................	19	TGAAGGAATTGATATATGC		1.2096	0.1003	0.3793	0.3621	0.1663	0.3245	0.4458	0.4478	0	1.1572	3.4506	16.8462	0	0	20.729	0.3146	29.3326	0	0	0	0	6.0822	28.349		0.812	0	0.1805	0.2614	0.0842	0	0	2.2387	0	0	0	0	0	0	0	0	0	0	0
dme-mir-ITS1_41_64_+	41	64	.........................................GTATTTTTAATTTCTTTCAATAA.....	23	GTATTTTTAATTTCTTTCAATAA		0.1396	0	0	0.1035	0.1663	0	0.2972	0	2.6734	3.4717	9.2017	8.4231	0	9.5624	0	0	29.3326	23.3103	16.7551	3.3035	0.2511	0	0		0.406	0	0	1.1111	0	0	2.173	0	0	0	0	0	0	0	0	0	0	0	0
dme-mir-ITS1_4_27_+	4	27	....ATTTATTGAAGGAATTGATATAT..........................................	23	ATTTATTGAAGGAATTGATATAT		0.0931	0.2006	0.2655	0.3104	0.0831	0	0.0743	0.1791	0	0	0	0	0	0	0	0.3146	0	0	1.2889	30.5578	17.0778	2.0274	37.7986		0.406	0.184	0	0.0327	0	0	0	2.2387	0	0	0	0	1.2361	0	0	0	0	0	0.1743
dme-mir-ITS1_32_56_+	32	56	................................TAAAATGGTGTATTTTTAATTTCT.............	24	TAAAATGGTGTATTTTTAATTTCT		0	0	0	0	0	0	0	0	0	0	0	21.0578	0	0	51.8226	0	7.3331	5.8276	0	0	0	0	0		0	0	0	0	0	2.1004	2.173	4.4773	24.7648	0	0	0	0	0	0	0	0	0	0
dme-mir-ITS1_10_37_+	10	37	..........TGAAGGAATTGATATATGCCAGTAAAA................................	27	TGAAGGAATTGATATATGCCAGTAAAA		0.1396	0.1003	0.1896	0.2587	0.4988	3.4609	0.2229	1.5226	0	0	0	0	0	0	0	0	0	0	0	0	0	6.0822	0		0.406	0	0	0	0	0	0	0	2.6773	0	0	0	0	0	0	0	0	0	0
dme-mir-ITS1_1_24_+	1	24	.TACATTTATTGAAGGAATTGATA.............................................	23	TACATTTATTGAAGGAATTGATA		0.0465	0	0	0.1035	1.912	3.2446	0.8173	2.06	0	0	0	4.2115	0	0	0	0	0	0	0	0.8259	0.5023	9.1233	0		0	0	0	0	0.0562	2.1004	0	0	0	0	0	0	0	0	0	0	0	0	0
dme-mir-ITS1_4_25_+	4	25	....ATTTATTGAAGGAATTGATAT............................................	21	ATTTATTGAAGGAATTGATAT		0.2326	0.4512	0.4931	0.3621	0.665	0.2163	0.3715	0.8957	0	0	0	0	0	0	0	0.3146	0	0	0.6444	4.1294	3.516	1.0137	47.2483		0.406	0.184	0	0	0.0281	0	0	0	0	3.3248	0	0	0	0	0	0	0	0	0
dme-mir-ITS1_6_25_+	6	25	......TTATTGAAGGAATTGATAT............................................	19	TTATTGAAGGAATTGATAT		0.1396	0.2507	0.0379	0.0517	0.3325	0.2163	0.2229	0.1791	0	3.4717	2.3004	0	0	0	0	0	7.3331	23.3103	1.9333	2.4777	2.2603	4.0548	113.396		0	0.046	0	0.098	0	4.2009	1.0865	0	1.3386	0	0	0	0	7.7615	0	0	0	0	0
dme-mir-ITS1_40_60_+	40	60	........................................TGTATTTTTAATTTCTTTCA.........	20	TGTATTTTTAATTTCTTTCA		0.0465	0	0.0379	0	0	0	0	0	0	5.7862	1.1502	4.2115	5.6823	0	0	0	0	0	21.9106	7.433	4.0183	0	0		0	0	0	0.2288	0	8.4017	2.173	11.1933	6.0239	0	0	0	0	0	0	0	0	0	0
dme-mir-ITS1_41_65_+	41	65	.........................................GTATTTTTAATTTCTTTCAATAAA....	24	GTATTTTTAATTTCTTTCAATAAA		0.2326	0	0.0379	0.1035	0.4156	0.1082	0.1486	0.0896	2.6734	1.1572	3.4506	16.8462	0	0	20.729	0	0	11.6551	7.7331	0	0	0	0		0	0	0	1.0131	0	0	1.0865	4.4773	2.008	0	0	0	0	0	0	0	0	0	0
dme-mir-ITS1_5_24_+	5	24	.....TTTATTGAAGGAATTGATA.............................................	19	TTTATTGAAGGAATTGATA		0.7444	0.351	0.5689	0.1552	0.8313	1.1897	0.2972	0.5374	0	0	1.1502	0	0	0	0	0	14.6663	0	0	2.4777	1.5069	3.0411	47.2483		0.406	0.046	0	0.1307	0.2808	0	0	2.2387	0.6693	0	0	0	0	0	0	0	0	0	0
dme-mir-ITS1_5_33_+	5	33	.....TTTATTGAAGGAATTGATATATGCCAGT....................................	28	TTTATTGAAGGAATTGATATATGCCAGT		0.884	0.2006	1.0241	0.3621	0	1.1897	0.1486	0.2687	0	0	0	0	0	0	0	0	0	0	0	2.4777	0	0	0		3.2479	0	0	0.098	0.2808	0	0	0	0	0	0	0	0	0	0	0	0	0	0
dme-mir-ITS1_9_35_+	9	35	.........TTGAAGGAATTGATATATGCCAGTAA..................................	26	TTGAAGGAATTGATATATGCCAGTAA		0.3257	0.1003	0.7207	0.5173	0.9144	2.0549	0.743	0.9852	0	1.1572	0	4.2115	0	0	0	0	7.3331	17.4827	0	0	0	2.0274	0		0	0	0	0	0.0562	2.1004	0	0	0	0	0	0	0	0	0	0	0	0	0
dme-mir-ITS1_4_23_+	4	23	....ATTTATTGAAGGAATTGAT..............................................	19	ATTTATTGAAGGAATTGAT		0.0465	0.2006	0.1517	0.1035	0.3325	0.1082	0.6687	0.0896	0	0	0	0	0	0	0	0.6291	0	0	1.2889	0	0.5023	0	18.8993		2.4359	0.46	0.1805	0	0.1685	0	0	0	0.6693	0	0	0	0.618	0	0	0	0	6.035	0
dme-mir-ITS1_5_26_+	5	26	.....TTTATTGAAGGAATTGATATA...........................................	21	TTTATTGAAGGAATTGATATA		0.0465	0.1504	0.4552	0.1035	0.4156	1.406	0.8173	1.1644	0	0	0	4.2115	0	0	0	0.3146	0	0	0	0.8259	0.5023	1.0137	18.8993		0.406	0.276	0	0.2614	0.5335	0	0	0	0	0	0	0	1.2361	0	0	0	0	0	0
dme-mir-ITS1_5_25_+	5	25	.....TTTATTGAAGGAATTGATAT............................................	20	TTTATTGAAGGAATTGATAT		0.4653	0.351	1.1	0.4656	0.0831	0.1082	0.5944	0.7165	0	0	1.1502	0	0	0	0	0	0	0	0.6444	2.4777	2.0091	1.0137	56.6979		0	0	0	0	0.0562	0	0	0	0	0	0	0	0	0	0	0	0	0	0
dme-mir-ITS1_40_66_+	40	66	........................................TGTATTTTTAATTTCTTTCAATAAAA...	26	TGTATTTTTAATTTCTTTCAATAAAA		0.884	0.2006	0.4172	0.6725	0.4156	0.4326	0.743	0.1791	0	0	0	8.4231	0	0	0	0	7.3331	5.8276	0	0	0	1.0137	0		0	0	0	0.2941	0.0281	0	0	0	1.3386	0	0	0	0	0	0	0	0	0	0
dme-mir-ITS1_8_27_+	8	27	........ATTGAAGGAATTGATATAT..........................................	19	ATTGAAGGAATTGATATAT		1.3027	0.2507	0.531	0.1552	0.1663	0.2163	0.1486	0	0	1.1572	0	4.2115	0	0	0	0.1573	0	0	0.6444	0.8259	1.0046	0	0		0	0.046	0	0.1961	0.0281	0	0	0	0	1.9949	0	0	0	0	0	0	0	0	0
dme-mir-ITS1_4_24_+	4	24	....ATTTATTGAAGGAATTGATA.............................................	20	ATTTATTGAAGGAATTGATA		0.0465	0.2507	0.1896	0.1035	0.2494	0.5408	0.3715	1.0748	0	1.1572	0	0	0	0	0	0.3146	0	0	0	0	0.2511	0	103.946		0.406	0.046	0	0.0327	0.2246	0	0	0	0	0.665	0	0	0	0	0	0	0	6.035	0
dme-mir-ITS1_5_28_+	5	28	.....TTTATTGAAGGAATTGATATATG.........................................	23	TTTATTGAAGGAATTGATATATG		0.2326	0.1003	0.1896	0.0517	0.4156	0.7571	0.8173	0.3583	0	0	0	0	0	0	0	0.1573	0	0	0	0.8259	0.5023	0	28.349		4.4658	0.138	0	0.0327	0	0	0	0	0	0	0	0	0	0	0	0	2.5939	0	0
dme-mir-ITS1_37_63_+	37	63	.....................................TGGTGTATTTTTAATTTCTTTCAATA......	26	TGGTGTATTTTTAATTTCTTTCAATA		0.0465	0	0	0	0	0	0	0	0	0	0	12.6347	0	0	10.3645	0	0	5.8276	0	0	0	0	0		0.406	0	0	0	0	2.1004	0	2.2387	7.3625	0	0	0	0	0	0	0	0	0	0
dme-mir-ITS1_11_31_+	11	31	...........GAAGGAATTGATATATGCCA......................................	20	GAAGGAATTGATATATGCCA		1.5818	0	0.3414	0.1035	0	0	0.0743	0.2687	2.6734	0	0	0	0	0	0	0	0	11.6551	0	0	0	0	0		0	0	0.1805	0.0327	0	0	0	0	16.733	0	0	0	0	0	0	0	0	0	0
dme-mir-ITS1_6_24_+	6	24	......TTATTGAAGGAATTGATA.............................................	18	TTATTGAAGGAATTGATA		0.0465	0	0	0	0	0	0.3715	0.0896	0	0	1.1502	0	0	0	10.3645	0	0	5.8276	0	0	0.5023	0	207.892		0.406	0	0.1805	0.098	0.2808	0	0	2.2387	0	0	0	0	0.618	0	0	0	0	0	0
dme-mir-ITS1_7_34_+	7	34	.......TATTGAAGGAATTGATATATGCCAGTA...................................	27	TATTGAAGGAATTGATATATGCCAGTA		0	0	0	0	0	0.2163	0.2229	0.3583	0	0	2.3004	0	0	0	0	0	0	0	0.6444	0.8259	0	0	0		0	0.046	0	0.2288	0.2808	0	3.2595	0	2.008	0	0	0	0	0	0	0	0	0	0
dme-mir-ITS1_8_33_+	8	33	........ATTGAAGGAATTGATATATGCCAGT....................................	25	ATTGAAGGAATTGATATATGCCAGT		0.0931	0	0.1517	0	0.7482	1.2978	0.4458	0.8061	0	0	0	0	0	0	0	0	0	0	0	0	0	0	0		0.406	0.046	0	0.1307	0.2527	0	0	0	0	0	0	0	0	0	0	0	0	0	0
dme-mir-ITS1_3_29_+	3	29	...CATTTATTGAAGGAATTGATATATGC........................................	26	CATTTATTGAAGGAATTGATATATGC		0	0	0	0	0.5819	0.5408	0.3715	0.9852	0	0	0	8.4231	0	0	10.3645	0	0	5.8276	0	0	0	2.0274	28.349		2.0299	0	0.361	0	0	4.2009	0	0	2.6773	0	0	0	0	0	9.1713	0	0	0	0
dme-mir-ITS1_4_30_+	4	30	....ATTTATTGAAGGAATTGATATATGCC.......................................	26	ATTTATTGAAGGAATTGATATATGCC		0.0465	0	0.0759	0.1552	0.0831	0.1082	0.1486	0.5374	0	0	0	0	0	0	0	0	0	0	0	0.8259	0.5023	0	0		7.3077	0	0	0.0654	0.5616	0	0	0	0	0	0	0	0	0	0	0	0	0	0
dme-mir-ITS1_4_32_+	4	32	....ATTTATTGAAGGAATTGATATATGCCAG.....................................	28	ATTTATTGAAGGAATTGATATATGCCAG		0	0.2006	0.1896	0	0	4.1099	0.2229	1.1644	0	0	0	0	0	0	0	0	0	0	0	0	0	0	0		0	0	0	0.0654	0.1123	0	0	0	0	0	0	0	0	0	0	0	0	0	0
dme-mir-ITS1_5_30_+	5	30	.....TTTATTGAAGGAATTGATATATGCC.......................................	25	TTTATTGAAGGAATTGATATATGCC		0	0	0	0	0.1663	0.2163	0.0743	0.3583	0	0	0	0	0	0	0	0	0	0	0.6444	5.7812	3.2649	0	9.4497		2.0299	0	0	0.1961	0.4212	0	0	0	2.008	0	0	0	0	0	0	0	0	0	0
dme-mir-ITS1_10_38_+	10	38	..........TGAAGGAATTGATATATGCCAGTAAAAT...............................	28	TGAAGGAATTGATATATGCCAGTAAAAT		0.1396	0.0501	0.4172	0.9311	0	1.8386	0	0.8957	0	0	0	0	0	0	0	0.1573	0	0	0	0	0	0	0		0	0	0	0	0	0	0	0	0	0	0	0	0	0	0	0	0	0	0
dme-mir-ITS1_4_28_+	4	28	....ATTTATTGAAGGAATTGATATATG.........................................	24	ATTTATTGAAGGAATTGATATATG		0	0.1003	0.0759	0	0.7482	0.7571	0.4458	0.4478	0	0	0	0	0	0	0	0.3146	0	0	0	0.8259	0.5023	1.0137	0		4.0598	0.046	0	0	0	0	0	0	0.6693	0	0	0	0.618	0	0	0	0	0	0
dme-mir-ITS1_4_26_+	4	26	....ATTTATTGAAGGAATTGATATA...........................................	22	ATTTATTGAAGGAATTGATATA		0.1396	0.0501	0.0759	0.3621	0.5819	0.2163	0.2229	0.7165	0	0	0	0	0	0	0	0.1573	0	0	0	0	0.7534	0	56.6979		0	0.184	0	0	0.1685	0	0	0	0	0	0	0	0.618	0	0	0	0	0	0.1743
dme-mir-ITS1_26_45_+	26	45	..........................TGCCAGTAAAATGGTGTAT........................	19	TGCCAGTAAAATGGTGTAT		0	0	0	0	0	0	0	0	0	0	0	0	0	0	0	0	0	0	0	0	0	0	0		0	0	0	0	0	4.2009	0	26.8639	22.0875	0	0	0	0	0	0	0	0	0	0
dme-mir-ITS1_9_36_+	9	36	.........TTGAAGGAATTGATATATGCCAGTAAA.................................	27	TTGAAGGAATTGATATATGCCAGTAAA		0.3257	0	0.1138	0.5173	0.1663	1.6223	0.3715	0.8061	0	0	0	0	0	0	0	0	0	0	0	0	0	0	0		0	0	0	0	0.1404	0	0	0	0	0	0	0	0	0	0	0	0	0	0
dme-mir-ITS1_9_32_+	9	32	.........TTGAAGGAATTGATATATGCCAG.....................................	23	TTGAAGGAATTGATATATGCCAG		0.5583	0.2507	0.4931	0.3621	0.1663	0.3245	0.2229	0.2687	0	0	0	0	0	0	0	0	0	0	0	0	0.2511	1.0137	0		0	0	0	0	0	0	0	0	0	0	0	0	0	0	0	0	0	0	0
dme-mir-ITS1_37_61_+	37	61	.....................................TGGTGTATTTTTAATTTCTTTCAA........	24	TGGTGTATTTTTAATTTCTTTCAA		0	0	0	0	0.0831	0	0	0.0896	0	1.1572	0	25.2693	0	0	41.4581	0	21.9995	0	0	0	0	0	0		0	0	0	0	0	0	0	2.2387	0.6693	0	0	0	0	0	0	0	0	0	0
dme-mir-ITS1_5_27_+	5	27	.....TTTATTGAAGGAATTGATATAT..........................................	22	TTTATTGAAGGAATTGATATAT		0.1861	0	0.0379	0.0517	0.1663	0.1082	0.0743	0.0896	0	0	2.3004	0	0	0	0	0.3146	0	0	0.6444	5.7812	4.0183	0	0		0	0.046	0	0	0.0281	0	3.2595	0	0.6693	0	0	0	0	0	0	0	0	0	0
dme-mir-ITS1_41_61_+	41	61	.........................................GTATTTTTAATTTCTTTCAA........	20	GTATTTTTAATTTCTTTCAA		0	0	0	0	0	0	0	0	2.6734	0	3.4506	4.2115	0	0	0	0	0	5.8276	5.7999	2.4777	0.5023	0	0		0	0	0	0.4248	0	0	2.173	4.4773	0	0	0	0	0	0	0	0	0	0	0
dme-mir-ITS1_7_35_+	7	35	.......TATTGAAGGAATTGATATATGCCAGTAA..................................	28	TATTGAAGGAATTGATATATGCCAGTAA		0.4653	0.0501	0.2655	0.3621	0.0831	0.8652	0.1486	0.7165	0	0	0	0	0	0	0	0.1573	0	0	0	1.6518	0	0	0		0.406	0	0	0.0327	0.1123	0	0	0	0	0	0	0	0	0	0	0	0	0	0
dme-mir-ITS1_32_55_+	32	55	................................TAAAATGGTGTATTTTTAATTTC..............	23	TAAAATGGTGTATTTTTAATTTC		0	0	0	0	0	0	0	0	2.6734	0	0	4.2115	0	0	0	0	0	0	0	0	0	0	0		0	0	0	0	0	0	0	0	2.008	0	0	0	0	0	0	0	0	0	0
dme-mir-ITS1_41_60_+	41	60	.........................................GTATTTTTAATTTCTTTCA.........	19	GTATTTTTAATTTCTTTCA		0	0	0	0	0	0	0	0	2.6734	1.1572	4.6008	0	0	9.5624	10.3645	0	0	0	9.6664	4.9553	2.5114	0	0		0	0	0	0	0	0	1.0865	0	0	0	0	0	0	0	0	0	0	0	0
dme-mir-ITS1_1_28_+	1	28	.TACATTTATTGAAGGAATTGATATATG.........................................	27	TACATTTATTGAAGGAATTGATATATG		0	0	0	0	0.5819	0.7571	0.4458	0.8061	0	0	0	0	0	0	0	0	0	0	0	0	0	3.0411	0		0	0	0	0	0	0	0	0	0	0	0	0	0	0	0	0	0	0	0
dme-mir-ITS1_1_27_+	1	27	.TACATTTATTGAAGGAATTGATATAT..........................................	26	TACATTTATTGAAGGAATTGATATAT		0	0.0501	0	0.0517	0.3325	0.9734	0.3715	0.1791	0	0	0	0	0	0	0	0	0	0	0	0	0.7534	1.0137	0		0	0	0	0.098	0.1404	0	0	0	0	0	0	0	0	0	0	0	0	0	0
dme-mir-ITS1_1_29_+	1	29	.TACATTTATTGAAGGAATTGATATATGC........................................	28	TACATTTATTGAAGGAATTGATATATGC		0	0	0.0379	0	0	0.8652	0.0743	0.5374	0	0	0	0	0	0	0	0	0	0	0	0.8259	0	0	0		0	0	0	0	0	0	0	0	0	0	0	0	0	0	0	0	0	0	0
dme-mir-ITS1_32_59_+	32	59	................................TAAAATGGTGTATTTTTAATTTCTTTC..........	27	TAAAATGGTGTATTTTTAATTTCTTTC		0	0	0	0	0	0	0	0	0	0	0	4.2115	0	0	0	0	0	0	0	0	0	0	0		0	0	0	0	0	0	2.173	0	2.6773	0	0	0	0	0	0	0	0	0	0
dme-mir-ITS1_37_64_+	37	64	.....................................TGGTGTATTTTTAATTTCTTTCAATAA.....	27	TGGTGTATTTTTAATTTCTTTCAATAA		0	0	0	0	0	0	0	0	0	0	0	0	0	0	10.3645	0	0	5.8276	0	0	0	0	0		0.406	0	0	0	0	0	0	0	4.6852	0	0	0	0	0	0	0	0	0	0
dme-mir-ITS1_9_34_+	9	34	.........TTGAAGGAATTGATATATGCCAGTA...................................	25	TTGAAGGAATTGATATATGCCAGTA		0.1396	0	0.3034	0	0.0831	0.5408	0.2229	0.0896	0	0	0	0	0	0	0	0	0	17.4827	0	0	0	0	0		0	0	0	0	0	0	0	0	0.6693	0	0	0	0	0	0	0	0	0	0
dme-mir-ITS1_10_28_+	10	28	..........TGAAGGAATTGATATATG.........................................	18	TGAAGGAATTGATATATG		0.3257	0.2507	0.1517	0.1035	0.4156	0.4326	0.2229	0.627	0	0	0	0	0	0	0	0.1573	0	0	0	0	0	0	9.4497		0	0	0	0	0	0	0	0	0	0	0	0	0	0	0	0	0	0	0
dme-mir-ITS1_42_65_+	42	65	..........................................TATTTTTAATTTCTTTCAATAAA....	23	TATTTTTAATTTCTTTCAATAAA		0.0931	0	0.1138	0.2069	0	0.1082	0	0.0896	0	0	0	0	0	0	0	0	0	0	2.5777	0.8259	0.5023	0	0		0.406	0	0	0.817	0	0	0	0	0	0	0	0	0	0	0	0	0	0	0
dme-mir-ITS1_42_63_+	42	63	..........................................TATTTTTAATTTCTTTCAATA......	21	TATTTTTAATTTCTTTCAATA		0	0	0	0	0	0	0	0	0	0	0	4.2115	0	0	0	0	0	0	1.2889	3.3035	3.516	0	0		0.406	0	0	0.719	0.0281	0	0	0	0.6693	0	0	0	0	0	0	0	0	0	0
dme-mir-ITS1_5_23_+	5	23	.....TTTATTGAAGGAATTGAT..............................................	18	TTTATTGAAGGAATTGAT		0	0	0	0.0517	0.0831	0	0.0743	0.1791	0	0	0	0	0	9.5624	0	0	7.3331	0	0	0	0	0	0		0	0	0	0	0.2527	0	1.0865	2.2387	2.008	0	0	0	0	0	0	0	0	0	0
dme-mir-ITS1_0_22_+	0	22	ATACATTTATTGAAGGAATTGA...............................................	22	ATACATTTATTGAAGGAATTGA		0.0931	0	0.2276	0.4656	0.3325	0.1082	0	1.0748	0	0	0	0	0	0	0	0	0	0	0	0	0	0	0		0	0.046	0	0	0	0	0	6.716	0	0	0	0	0	0	0	0	0	0	0
dme-mir-ITS1_9_27_+	9	27	.........TTGAAGGAATTGATATAT..........................................	18	TTGAAGGAATTGATATAT		0.1861	0	0.0379	0.0517	0	0	0.1486	0.1791	0	0	1.1502	0	0	0	0	0	0	0	0	1.6518	1.0046	0	37.7986		0	0	0	0.0327	0.0281	2.1004	0	2.2387	0	0	0	0	0	0	0	0	0	0	0
dme-mir-ITS1_1_25_+	1	25	.TACATTTATTGAAGGAATTGATAT............................................	24	TACATTTATTGAAGGAATTGATAT		0	0	0.0759	0.1552	0	0.1082	0.2229	0.0896	0	1.1572	0	0	0	0	10.3645	0.1573	0	0	0.6444	0.8259	2.0091	1.0137	0		0.406	0.046	0	0	0	0	0	0	0	0	0	0	0	0	0	0	0	0	0
dme-mir-ITS1_8_32_+	8	32	........ATTGAAGGAATTGATATATGCCAG.....................................	24	ATTGAAGGAATTGATATATGCCAG		0.0465	0	0.0759	0	0.3325	0.6489	0.3715	1.2539	0	0	0	0	0	0	0	0	0	0	0	0	0.2511	0	0		0.406	0	0	0.0327	0	0	0	0	3.3466	0	0	0	0	0	0	0	0	0	0
dme-mir-ITS1_0_21_+	0	21	ATACATTTATTGAAGGAATTG................................................	21	ATACATTTATTGAAGGAATTG		0	0.7019	0	0.3104	0.0831	0.3245	0.1486	0.4478	0	0	0	0	0	0	0	0	0	0	0	0	0	0	0		0	0.046	0	0	0	0	0	4.4773	0	0	0	0	0	0	0	0	0	0	0
dme-mir-ITS1_1_22_+	1	22	.TACATTTATTGAAGGAATTGA...............................................	21	TACATTTATTGAAGGAATTGA		0.0465	0.1003	0.0759	0.2069	0.1663	0.2163	0.0743	0.5374	0	0	0	0	0	0	0	0.1573	0	0	0	0	0	0	0		0	0	0	0.0654	0.0562	0	0	4.4773	0	0	0	0	0	0	0	0	0	0	0
dme-mir-ITS1_11_29_+	11	29	...........GAAGGAATTGATATATGC........................................	18	GAAGGAATTGATATATGC		0.3257	0.0501	0.0759	0	0.1663	0	0	0	0	0	0	0	0	0	10.3645	0	0	0	0	0	0	4.0548	0		0	0	0.1805	0	0	0	0	2.2387	0	0	0	0	0	0	0	0	0	0	0
dme-mir-ITS1_12_37_+	12	37	............AAGGAATTGATATATGCCAGTAAAA................................	25	AAGGAATTGATATATGCCAGTAAAA		0	0	0	0	0.4156	0.2163	0	1.6122	0	0	0	4.2115	0	0	20.729	0	0	0	0	0	0	4.0548	0		0	0	0	0	0	0	0	0	0	0	0	0	0	0	0	0	0	0	0
dme-mir-ITS1_37_60_+	37	60	.....................................TGGTGTATTTTTAATTTCTTTCA.........	23	TGGTGTATTTTTAATTTCTTTCA		0	0	0	0	0	0	0	0	0	0	0	4.2115	0	0	0	0	0	0	0	0	0	0	0		0	0	0	0	0	0	2.173	4.4773	2.6773	0	0	0	0	0	0	0	0	0	0
dme-mir-ITS1_42_64_+	42	64	..........................................TATTTTTAATTTCTTTCAATAA.....	22	TATTTTTAATTTCTTTCAATAA		0.0465	0	0	0	0	0	0	0	2.6734	1.1572	0	0	0	0	0	0	0	0	1.2889	0.8259	0.2511	0	0		0	0	0	0.5556	0.0562	0	1.0865	0	0	0	0	0	0	0	0	0	0	0	0
dme-mir-ITS1_37_62_+	37	62	.....................................TGGTGTATTTTTAATTTCTTTCAAT.......	25	TGGTGTATTTTTAATTTCTTTCAAT		0	0	0	0	0	0	0	0	0	0	1.1502	4.2115	0	0	0	0	0	0	0	0	0	1.0137	0		0	0	0	0	0	0	0	0	0	0	0	0	0	0	0	0	0	0	0
dme-mir-ITS1_11_30_+	11	30	...........GAAGGAATTGATATATGCC.......................................	19	GAAGGAATTGATATATGCC		0.5583	0.0501	0	0	0.3325	0.1082	0	0.0896	0	0	0	0	0	0	0	0	0	0	0	0	0	1.0137	0		0.406	0	0	0.1634	0.0562	0	0	0	0	0	0	0	0	0	0	0	0	0	0
dme-mir-ITS1_4_31_+	4	31	....ATTTATTGAAGGAATTGATATATGCCA......................................	27	ATTTATTGAAGGAATTGATATATGCCA		0.0931	0.0501	0.0759	0.0517	0.0831	0.2163	0.0743	0.4478	0	0	0	0	0	0	0	0	0	0	0	0.8259	0.2511	0	0		0.406	0.092	0	0	0.0281	0	0	0	0	0	0	0	0	0	0	0	0	0	0
dme-mir-ITS1_1_23_+	1	23	.TACATTTATTGAAGGAATTGAT..............................................	22	TACATTTATTGAAGGAATTGAT		0.0931	0	0.0379	0	0	0.1082	0.0743	0	0	0	0	0	0	0	0	0	0	0	0	0	0.5023	0	0		0	0	0	0.0327	0.0562	2.1004	0	0	0	0	0	0	0	0	0	0	0	0	0.1743
dme-mir-ITS1_43_63_+	43	63	...........................................ATTTTTAATTTCTTTCAATA......	20	ATTTTTAATTTCTTTCAATA		0.1396	0	0	0	0.0831	0	0	0	0	0	0	0	0	0	0	0	0	0	7.0887	0	0.2511	0	0		0	0	0	0.1307	0.0842	0	0	0	0	0	0	0	0	0	0	0	0	0	0
dme-mir-ITS1_11_33_+	11	33	...........GAAGGAATTGATATATGCCAGT....................................	22	GAAGGAATTGATATATGCCAGT		0	0	0	0.0517	0	0.1082	0	0	0	0	0	0	0	0	0	0	0	0	0	0	0	0	0		0	0.046	0	0	0	0	0	0	0	0	0	0	0	0	0	0	7.7816	0	0
dme-mir-ITS1_37_59_+	37	59	.....................................TGGTGTATTTTTAATTTCTTTC..........	22	TGGTGTATTTTTAATTTCTTTC		0.2326	0.0501	0.1896	0	0	0	0.0743	0.0896	0	0	1.1502	8.4231	0	0	0	0	0	0	0	0	0	0	0		0	0	0	0	0	0	1.0865	0	1.3386	0	0	0	0	0	0	0	0	0	0
dme-mir-ITS1_40_67_+	40	67	........................................TGTATTTTTAATTTCTTTCAATAAAAA..	27	TGTATTTTTAATTTCTTTCAATAAAAA		0.2792	0.0501	0.1896	0	0.1663	0.2163	0.1486	0.0896	0	0	0	0	0	0	0	0	0	0	0	0	0	0	0		0	0	0	0.0654	0	0	0	0	0.6693	0	0	0	0	0	0	0	0	0	0
dme-mir-ITS1_3_28_+	3	28	...CATTTATTGAAGGAATTGATATATG.........................................	25	CATTTATTGAAGGAATTGATATATG		0	0	0	0	0.3325	0.4326	0.2972	0.0896	0	0	0	0	0	0	0	0.1573	0	0	0	0	0	1.0137	0		1.218	0	0	0	0	0	0	0	0	0	0	0	0	0	0	0	0	0	0
dme-mir-ITS1_4_22_+	4	22	....ATTTATTGAAGGAATTGA...............................................	18	ATTTATTGAAGGAATTGA		0	0	0	0	0.3325	0	0.0743	0.3583	0	0	0	0	0	0	0	0	0	0	0.6444	0	0	0	18.8993		0	0.046	0	0	0	0	0	0	0	0	0	0	0	0	0	0	0	0	0
dme-mir-ITS1_12_31_+	12	31	............AAGGAATTGATATATGCCA......................................	19	AAGGAATTGATATATGCCA		0.977	0.0501	0.0759	0.0517	0	0	0	0	0	0	0	4.2115	0	0	0	0	0	0	0	0	0	0	0		0	0	0	0	0	0	0	0	0	0	0	0	0	0	0	0	0	0	0
dme-mir-ITS1_43_65_+	43	65	...........................................ATTTTTAATTTCTTTCAATAAA....	22	ATTTTTAATTTCTTTCAATAAA		0.0465	0	0.0379	0.1035	0	0	0	0.0896	0	0	0	0	0	0	0	0	0	0	2.5777	0	0.2511	0	0		0	0	0	0.2288	0	0	1.0865	0	1.3386	0	0	0	0	0	0	0	0	0	0
dme-mir-ITS1_43_62_+	43	62	...........................................ATTTTTAATTTCTTTCAAT.......	19	ATTTTTAATTTCTTTCAAT		0	0	0	0	0	0	0	0	2.6734	0	1.1502	0	0	0	0	0	0	0	3.8666	3.3035	1.5069	0	0		0	0	0	0.0654	0.0281	0	0	0	0	0	0	0	0	0	0	0	0	0	0
dme-mir-ITS1_2_26_+	2	26	..ACATTTATTGAAGGAATTGATATA...........................................	24	ACATTTATTGAAGGAATTGATATA		0	0	0	0	0.4156	1.0815	0.2229	0.2687	0	0	0	0	0	0	0	0	0	0	0	0	0	0	0		0	0	0.1805	0	0	0	0	0	0	0	0	0	0	0	0	0	0	0	0
dme-mir-ITS1_35_61_+	35	61	...................................AATGGTGTATTTTTAATTTCTTTCAA........	26	AATGGTGTATTTTTAATTTCTTTCAA		0	0	0	0	0	0	0	0	0	0	1.1502	0	0	0	0	0	0	11.6551	0	0	0	0	0		0	0	0	0	0	0	0	0	4.0159	0	0	0	0	0	0	0	0	0	0
dme-mir-ITS1_2_29_+	2	29	..ACATTTATTGAAGGAATTGATATATGC........................................	27	ACATTTATTGAAGGAATTGATATATGC		0	0	0	0	0	0.1082	0	0.2687	0	0	0	0	0	0	0	0	0	0	0	0	0	2.0274	0		0	0	0.1805	0	0	2.1004	0	0	0	0	0	0	0	0	0	0	0	0	0
dme-mir-ITS1_14_39_+	14	39	..............GGAATTGATATATGCCAGTAAAATG..............................	25	GGAATTGATATATGCCAGTAAAATG		0	0	0	0	0.0831	0	0	0	0	0	0	8.4231	0	0	10.3645	0	14.6663	40.793	0	0	0	0	0		0	0	0	0	0	0	0	0	1.3386	0	0	0	0	0	0	0	0	0	0
dme-mir-ITS1_8_26_+	8	26	........ATTGAAGGAATTGATATA...........................................	18	ATTGAAGGAATTGATATA		0	0	0	0.1035	0.2494	0.1082	0.2229	0.2687	0	0	0	0	0	0	0	0	0	0	0.6444	0	0	1.0137	0		0	0	0	0	0.0842	0	0	0	0	0	0	0	0	0	0	0	0	0	0
dme-mir-ITS1_25_43_+	25	43	.........................ATGCCAGTAAAATGGTGT..........................	18	ATGCCAGTAAAATGGTGT		0	0	0	0	0	0	0	0	0	1.1572	0	4.2115	0	0	10.3645	0	0	0	0	0	0	0	0		0	0	0	0	0	0	0	0	4.6852	0	0	0	0	0	0	0	0	0	0
dme-mir-ITS1_34_61_+	34	61	..................................AAATGGTGTATTTTTAATTTCTTTCAA........	27	AAATGGTGTATTTTTAATTTCTTTCAA		0	0	0	0	0	0	0	0	0	0	0	0	0	0	0	0	0	0	0	0	0	0	0		0	0	0	0	0	0	0	2.2387	4.0159	0	0	0	0	0	0	0	0	0	0
dme-mir-ITS1_38_60_+	38	60	......................................GGTGTATTTTTAATTTCTTTCA.........	22	GGTGTATTTTTAATTTCTTTCA		0	0	0	0	0	0	0	0	0	0	0	4.2115	0	9.5624	0	0	7.3331	0	0	0	0	0	0		0.406	0	0	0	0	0	0	4.4773	7.3625	0	0	0	0	0	0	0	0	0	0
dme-mir-ITS1_3_24_+	3	24	...CATTTATTGAAGGAATTGATA.............................................	21	CATTTATTGAAGGAATTGATA		0	0.2507	0	0.0517	0	0.2163	0	0	0	0	0	0	0	0	0	0	0	0	0	0	0	0	66.1476		0.406	0	0	0	0	0	0	0	0	0	0	0	0	0	0	0	0	0	0
dme-mir-ITS1_6_34_+	6	34	......TTATTGAAGGAATTGATATATGCCAGTA...................................	28	TTATTGAAGGAATTGATATATGCCAGTA		0.0465	0	0.1138	0.1552	0	0.2163	0.0743	0.0896	0	0	0	0	0	0	0	0.1573	0	0	0	0	0	1.0137	0		0	0	0	0	0.0562	0	0	0	0	0	0	0	0	0	0	0	0	0	0
dme-mir-ITS1_23_44_+	23	44	.......................ATATGCCAGTAAAATGGTGTA.........................	21	ATATGCCAGTAAAATGGTGTA		0	0	0	0	0	0	0	0	2.6734	0	1.1502	4.2115	0	0	0	0	0	0	0	0	0	0	0		0	0	0	0	0	0	0	2.2387	8.0318	0	0	0	0	0	0	0	0	0	0
dme-mir-ITS1_24_43_+	24	43	........................TATGCCAGTAAAATGGTGT..........................	19	TATGCCAGTAAAATGGTGT		0	0	0	0	0	0	0	0	0	0	0	0	0	0	0	0	0	0	0	0	0	0	0		0	0	0	0	0.0562	0	0	4.4773	6.6932	0	0	0	0	0	0	0	0	0	0
dme-mir-ITS1_39_63_+	39	63	.......................................GTGTATTTTTAATTTCTTTCAATA......	24	GTGTATTTTTAATTTCTTTCAATA		0.6048	0	0.0379	0.0517	0.0831	0	0.1486	0	0	0	0	0	0	0	0	0	0	0	0	0	0.2511	0	0		0	0.046	0	0	0	0	0	0	0	0	0	0	0	0	0	0	0	0	0
dme-mir-ITS1_43_64_+	43	64	...........................................ATTTTTAATTTCTTTCAATAA.....	21	ATTTTTAATTTCTTTCAATAA		0.0465	0	0.0379	0	0	0	0	0	0	0	0	0	0	0	0	0	0	0	3.8666	0	0	0	0		0	0	0	0.1961	0	0	0	0	0	0	0	0	0	0	0	0	0	0	0
dme-mir-ITS1_2_25_+	2	25	..ACATTTATTGAAGGAATTGATAT............................................	23	ACATTTATTGAAGGAATTGATAT		0.0465	0	0	0.0517	0	0	0	0	0	0	0	0	0	0	0	0	0	0	0	0.8259	0.2511	0	0		0	0	0	0	0	0	0	2.2387	7.3625	0	0	0	0	0	0	0	0	0	0
dme-mir-ITS1_0_24_+	0	24	ATACATTTATTGAAGGAATTGATA.............................................	24	ATACATTTATTGAAGGAATTGATA		0	0	0	0	0.3325	0.2163	0.0743	0.3583	0	0	0	0	0	0	0	0	0	0	0	0	0	0	0		0	0	0	0	0.0562	0	0	0	0	0	0	0	0	0	0	0	0	0	0
dme-mir-ITS1_19_39_+	19	39	...................TGATATATGCCAGTAAAATG..............................	20	TGATATATGCCAGTAAAATG		0	0	0	0	0	0	0	0	0	0	1.1502	0	0	0	0	0	14.6663	0	0	0	0	0	0		0	0	0	0.0327	0.2246	0	0	0	0.6693	0	0	0	0	0	0	0	0	0	0
dme-mir-ITS1_22_43_+	22	43	......................TATATGCCAGTAAAATGGTGT..........................	21	TATATGCCAGTAAAATGGTGT		0	0	0	0.0517	0	0	0	0	0	0	0	0	0	0	0	0	0	0	0	0	0	0	0		0	0	0	0.098	0	0	0	0	0	0	0	0	0	0	0	114.53	0	0	0
dme-mir-ITS1_38_62_+	38	62	......................................GGTGTATTTTTAATTTCTTTCAAT.......	24	GGTGTATTTTTAATTTCTTTCAAT		0	0	0	0	0	0	0.0743	0	0	0	0	0	0	0	10.3645	0	0	0	0.6444	0	0	0	0		0	0	0	0	0	0	0	6.716	0	0	0	0	0	0	0	0	0	0	0
dme-mir-ITS1_8_34_+	8	34	........ATTGAAGGAATTGATATATGCCAGTA...................................	26	ATTGAAGGAATTGATATATGCCAGTA		0	0	0	0	0	0.2163	0.3715	0.2687	0	0	1.1502	0	0	0	0	0	0	0	0	0	0	0	0		0	0	0	0	0.0562	0	0	2.2387	0	0	0	0	0	0	0	0	0	0	0
dme-mir-ITS1_11_37_+	11	37	...........GAAGGAATTGATATATGCCAGTAAAA................................	26	GAAGGAATTGATATATGCCAGTAAAA		0	0	0.0379	0	0.0831	0.2163	0.1486	0	0	0	0	0	0	0	0	0	0	0	0	0	0	0	0		0	0	0	0	0	0	0	0	0	0	0	0	0	0	0	0	0	0	0
dme-mir-ITS1_12_33_+	12	33	............AAGGAATTGATATATGCCAGT....................................	21	AAGGAATTGATATATGCCAGT		0	0.0501	0.0759	0	0.1663	0.2163	0	0.0896	0	0	0	0	0	0	0	0	0	0	0	0	0	0	0		0.406	0	0	0	0	0	0	2.2387	0	1.9949	0	0	0	0	0	0	0	0	0
dme-mir-ITS1_42_62_+	42	62	..........................................TATTTTTAATTTCTTTCAAT.......	20	TATTTTTAATTTCTTTCAAT		0	0	0	0	0	0	0	0	0	0	0	0	0	0	0	0	0	0	2.5777	0.8259	0.5023	0	0		0	0	0	0.1307	0.0281	0	0	0	0	0	0	0	0	0	0	0	5.1877	0	0
dme-mir-ITS1_3_30_+	3	30	...CATTTATTGAAGGAATTGATATATGCC.......................................	27	CATTTATTGAAGGAATTGATATATGCC		0	0	0	0	0	0.1082	0	0.0896	0	0	0	0	0	0	0	0	0	0	0	0	0	0	18.8993		2.0299	0.046	0	0	0	0	0	0	0	0	0	0	0	0	0	0	0	0	0
dme-mir-ITS1_1_21_+	1	21	.TACATTTATTGAAGGAATTG................................................	20	TACATTTATTGAAGGAATTG		0.0465	0	0	0.0517	0.0831	0	0.1486	0	0	0	0	0	0	0	0	0	0	0	0	0	0	0	0		0	0.046	0	0	0	0	0	6.716	0.6693	0	0	0	0	0	0	0	0	0	0
dme-mir-ITS1_12_30_+	12	30	............AAGGAATTGATATATGCC.......................................	18	AAGGAATTGATATATGCC		0.1861	0.1003	0	0.0517	0	0	0	0.1791	0	0	1.1502	0	0	0	0	0	0	0	0	0	0	1.0137	0		0	0	0	0.0654	0	0	0	0	0	0	0	0	0	0	0	0	0	0	0
dme-mir-ITS1_12_38_+	12	38	............AAGGAATTGATATATGCCAGTAAAAT...............................	26	AAGGAATTGATATATGCCAGTAAAAT		0	0	0	0	0.0831	0.2163	0	0.8957	0	0	0	0	0	0	0	0	0	0	0	0	0	0	0		0	0	0	0	0	0	0	0	0	0	0	0	0	0	0	0	0	0	0
dme-mir-ITS1_13_31_+	13	31	.............AGGAATTGATATATGCCA......................................	18	AGGAATTGATATATGCCA		0.4653	0	0.0759	0	0.0831	0	0	0	0	0	0	0	0	0	0	0	0	0	0	0.8259	0	0	0		0	0	0	0	0	0	0	0	0	0	0	0	0	0	0	0	0	0	0
dme-mir-ITS1_16_39_+	16	39	................AATTGATATATGCCAGTAAAATG..............................	23	AATTGATATATGCCAGTAAAATG		0	0	0	0	0	0.1082	0	0	0	0	0	0	0	0	20.729	0	0	0	0	0	0	1.0137	0		0	0	0	0	0	0	0	0	1.3386	0	0	0	0	0	0	0	0	0	0
dme-mir-ITS1_26_44_+	26	44	..........................TGCCAGTAAAATGGTGTA.........................	18	TGCCAGTAAAATGGTGTA		0	0	0	0	0	0	0	0	0	0	0	0	0	0	0	0	0	0	0	0	0	0	0		0	0	0	0	0	0	0	0	2.008	0	0	0	0	0	0	0	0	0	0
dme-mir-ITS1_2_21_+	2	21	..ACATTTATTGAAGGAATTG................................................	19	ACATTTATTGAAGGAATTG		0	0	0.0759	0	0.0831	0	0.1486	0.2687	0	0	0	0	0	0	0	0	0	0	0	0	0.2511	0	0		0	0	0	0	0	0	0	2.2387	0	0	0	0	0	0	0	0	0	0	0
dme-mir-ITS1_11_32_+	11	32	...........GAAGGAATTGATATATGCCAG.....................................	21	GAAGGAATTGATATATGCCAG		0	0	0	0.0517	0	0	0	0	0	0	0	4.2115	0	0	0	0	0	0	0	0	0	0	0		0	0	0	0	0	0	0	4.4773	0	0	0	0	0	0	0	0	0	0	0
dme-mir-ITS1_38_64_+	38	64	......................................GGTGTATTTTTAATTTCTTTCAATAA.....	26	GGTGTATTTTTAATTTCTTTCAATAA		0.0465	0	0	0	0	0	0	0	0	0	0	0	0	0	0	0	0	0	0	3.3035	0.5023	0	0		0	0	0	0	0	0	0	2.2387	2.008	0	0	0	0	0	0	0	0	0	0
dme-mir-ITS1_38_63_+	38	63	......................................GGTGTATTTTTAATTTCTTTCAATA......	25	GGTGTATTTTTAATTTCTTTCAATA		0.0465	0	0	0	0	0	0	0	0	0	0	4.2115	0	0	0	0	0	0	0	1.6518	0	0	0		0	0	0	0	0	0	0	2.2387	4.0159	0	0	0	0	0	0	0	0	0	0
dme-mir-ITS1_0_26_+	0	26	ATACATTTATTGAAGGAATTGATATA...........................................	26	ATACATTTATTGAAGGAATTGATATA		0	0	0	0	0.0831	0.4326	0.2229	0.0896	0	0	0	0	0	0	0	0	0	0	0	0	0	1.0137	0		0	0	0	0	0	0	0	0	0	0	0	0	0	0	0	0	0	0	0
dme-mir-ITS1_2_27_+	2	27	..ACATTTATTGAAGGAATTGATATAT..........................................	25	ACATTTATTGAAGGAATTGATATAT		0	0	0	0	0	0.1082	0	0.0896	0	0	0	0	0	0	10.3645	0	0	0	0	0	0	0	9.4497		0	0.046	0	0	0.0281	0	0	0	0	0	0	0	0	0	0	0	0	0	0
dme-mir-ITS1_17_39_+	17	39	.................ATTGATATATGCCAGTAAAATG..............................	22	ATTGATATATGCCAGTAAAATG		0	0	0	0	0.1663	0	0	0	0	0	1.1502	4.2115	0	0	0	0	0	5.8276	0	0	0	0	0		0	0	0	0	0	0	0	2.2387	0.6693	0	0	0	0	0	0	0	0	0	0
dme-mir-ITS1_1_30_+	1	30	.TACATTTATTGAAGGAATTGATATATGCC.......................................	29	TACATTTATTGAAGGAATTGATATATGCC		0	0	0	0	0	0	0	0	0	0	0	0	0	0	0	0	0	0	0	0	0	0	0		0	0	0	0	0	0	0	0	0	0	0	0	0	0	0	0	0	0	0
dme-mir-ITS1_1_20_+	1	20	.TACATTTATTGAAGGAATT.................................................	19	TACATTTATTGAAGGAATT		0	0	0	0	0	0	0	0.1791	0	0	0	4.2115	0	0	0	0	0	0	0	0	1.0046	1.0137	0		0	0	0	0	0	0	0	2.2387	0	0	0	0	0	0	0	0	0	0	0
dme-mir-ITS1_23_48_+	23	48	.......................ATATGCCAGTAAAATGGTGTATTTT.....................	25	ATATGCCAGTAAAATGGTGTATTTT		0	0	0	0	0	0	0	0	0	0	0	0	0	0	0	0	0	0	0	0	0	0	0		0	0	0	0	0	0	0	4.4773	5.3546	0	0	0	0	0	0	0	0	0	0
dme-mir-ITS1_25_45_+	25	45	.........................ATGCCAGTAAAATGGTGTAT........................	20	ATGCCAGTAAAATGGTGTAT		0	0	0	0	0	0	0	0	0	0	0	0	0	0	0	0	0	0	0	0	0	0	0		0	0	0	0	0	0	0	4.4773	3.3466	0	0	0	0	0	0	0	0	0	0
dme-mir-ITS1_26_52_+	26	52	..........................TGCCAGTAAAATGGTGTATTTTTAAT.................	26	TGCCAGTAAAATGGTGTATTTTTAAT		0	0	0	0	0	0	0	0	0	0	0	8.4231	0	0	0	0	0	0	0	0	0	0	0		0	0	0	0	0	0	0	0	2.008	0	0	0	0	0	0	0	0	0	0
dme-mir-ITS1_29_53_+	29	53	.............................CAGTAAAATGGTGTATTTTTAATT................	24	CAGTAAAATGGTGTATTTTTAATT		0	0	0	0	0	0	0	0	0	0	0	0	0	0	0	0	0	0	0	0	0	0	0		0	0	0	0	0	2.1004	0	2.2387	0	0	0	0	0	0	0	0	0	0	0
dme-mir-ITS1_37_58_+	37	58	.....................................TGGTGTATTTTTAATTTCTTT...........	21	TGGTGTATTTTTAATTTCTTT		0	0	0.0379	0	0	0	0	0	0	1.1572	1.1502	4.2115	0	0	20.729	0	0	0	0	0	0	0	0		0	0	0	0	0	0	0	2.2387	0	0	0	0	0	0	0	0	0	0	0
dme-mir-ITS1_37_56_+	37	56	.....................................TGGTGTATTTTTAATTTCT.............	19	TGGTGTATTTTTAATTTCT		0	0	0	0	0	0	0	0	0	0	0	0	0	0	0	0	0	0	0	0	0	0	0		0	0	0	0	0	2.1004	0	0	1.3386	0	0	0	0	0	0	0	0	0	0
dme-mir-ITS1_0_23_+	0	23	ATACATTTATTGAAGGAATTGAT..............................................	23	ATACATTTATTGAAGGAATTGAT		0	0	0	0	0	0.1082	0.1486	0	0	0	0	0	0	0	0	0	0	0	0	0	0	0	0		0	0	0	0	0	0	0	0	1.3386	0	0	0	0	0	0	0	0	0	0
dme-mir-ITS1_0_19_+	0	19	ATACATTTATTGAAGGAAT..................................................	19	ATACATTTATTGAAGGAAT		0	0	0	0	0.0831	0	0.0743	0	0	0	0	0	0	0	0	0	0	0	0	0	0	1.0137	0		0	0	0	0	0	0	0	0	2.6773	0	0	0	0	0	0	0	0	0	0
dme-mir-ITS1_2_28_+	2	28	..ACATTTATTGAAGGAATTGATATATG.........................................	26	ACATTTATTGAAGGAATTGATATATG		0	0	0	0	0.0831	0.2163	0.0743	0.1791	0	0	0	0	0	0	0	0	0	0	0	0	0	0	0		0	0.046	0.1805	0	0	0	0	0	0	0	0	0	0	0	0	0	0	0	0
dme-mir-ITS1_2_23_+	2	23	..ACATTTATTGAAGGAATTGAT..............................................	21	ACATTTATTGAAGGAATTGAT		0.0465	0	0	0	0	0.3245	0	0	0	0	0	0	0	0	0	0	0	0	0.6444	0	0	0	0		0	0	0	0	0	0	0	2.2387	0	0	0	0	0	0	0	0	0	0	0
dme-mir-ITS1_12_36_+	12	36	............AAGGAATTGATATATGCCAGTAAA.................................	24	AAGGAATTGATATATGCCAGTAAA		0	0	0	0	0.1663	0	0.0743	0.4478	0	0	0	8.4231	0	0	0	0	0	0	0	0	0	0	0		0	0	0	0	0	0	0	0	0	0	0	0	0	0	0	0	0	0	0
dme-mir-ITS1_18_39_+	18	39	..................TTGATATATGCCAGTAAAATG..............................	21	TTGATATATGCCAGTAAAATG		0	0	0	0.0517	0	0	0	0.0896	0	0	0	4.2115	0	0	0	0	0	5.8276	0	0	0	2.0274	0		0.406	0	0	0	0	0	0	0	0.6693	0	0	0	0	0	0	0	0	0	0
dme-mir-ITS1_30_51_+	30	51	..............................AGTAAAATGGTGTATTTTTAA..................	21	AGTAAAATGGTGTATTTTTAA		0	0	0	0	0	0	0	0.0896	0	0	0	0	0	0	0	0	0	0	0	0	0	0	0		1.218	0	0	0	0	0	2.173	0	1.3386	0	0	0	0	0	0	0	0	0	0
dme-mir-ITS1_33_59_+	33	59	.................................AAAATGGTGTATTTTTAATTTCTTTC..........	26	AAAATGGTGTATTTTTAATTTCTTTC		0	0	0	0	0	0	0	0	0	0	0	0	0	0	0	0	7.3331	0	0	0	0	0	0		0	0	0	0	0	0	0	0	0	0	0	0	0	0	0	0	0	0	0
dme-mir-ITS1_37_65_+	37	65	.....................................TGGTGTATTTTTAATTTCTTTCAATAAA....	28	TGGTGTATTTTTAATTTCTTTCAATAAA		0	0	0	0	0	0	0	0	0	0	0	0	0	0	0	0	0	0	0	0	0	0	0		0	0	0	0	0	0	1.0865	0	0	0	0	0	0	0	0	0	0	0	0
dme-mir-ITS1_38_65_+	38	65	......................................GGTGTATTTTTAATTTCTTTCAATAAA....	27	GGTGTATTTTTAATTTCTTTCAATAAA		0.0465	0	0	0	0	0	0	0	0	0	0	0	0	0	0	0	0	0	0	2.4777	0.2511	0	0		0.406	0	0	0	0.0842	0	0	0	0	0	0	0	0	0	0	0	0	0	0
dme-mir-ITS1_41_66_+	41	66	.........................................GTATTTTTAATTTCTTTCAATAAAA...	25	GTATTTTTAATTTCTTTCAATAAAA		0	0	0	0	0	0	0.0743	0	0	0	0	4.2115	0	0	10.3645	0	0	0	0.6444	0	0	0	0		0	0	0	0.0654	0.0281	0	0	0	0	0	0	0	0	0	0	0	0	0	0
dme-mir-ITS1_2_22_+	2	22	..ACATTTATTGAAGGAATTGA...............................................	20	ACATTTATTGAAGGAATTGA		0	0	0	0	0.0831	0.1082	0.0743	0	0	0	0	0	0	0	0	0	0	0	0	0	0	0	0		0	0.046	0	0	0	0	0	4.4773	0	0	0	0	0	0	0	0	0	0	0
dme-mir-ITS1_3_31_+	3	31	...CATTTATTGAAGGAATTGATATATGCCA......................................	28	CATTTATTGAAGGAATTGATATATGCCA		0	0	0	0	0	0.4326	0.0743	0.0896	0	0	0	0	0	0	0	0	0	0	0	0	0	0	0		0	0	0	0	0	0	0	0	0	0	0	0	0	0	0	0	0	0	0
dme-mir-ITS1_4_33_+	4	33	....ATTTATTGAAGGAATTGATATATGCCAGT....................................	29	ATTTATTGAAGGAATTGATATATGCCAGT		0.0465	0	0	0	0	0.4326	0	0	0	0	0	0	0	0	0	0	0	0	0	0	0.2511	0	0		0	0	0	0	0.0281	0	0	0	0	0	0	0	0	0	0	0	0	0	0
dme-mir-ITS1_7_36_+	7	36	.......TATTGAAGGAATTGATATATGCCAGTAAA.................................	29	TATTGAAGGAATTGATATATGCCAGTAAA		0.0465	0	0	0	0	0	0	0	0	0	0	0	0	0	0	0	0	0	0	0	0	0	0		0	0	0	0	0.1404	0	0	0	0	0	0	0	0	0	0	0	0	0	0
dme-mir-ITS1_32_54_+	32	54	................................TAAAATGGTGTATTTTTAATTT...............	22	TAAAATGGTGTATTTTTAATTT		0	0	0	0.0517	0	0	0	0	0	0	0	0	0	0	0	0	0	0	0	0	0	0	0		0	0	0	0	0	0	0	0	0	0	0	0	0	0	0	0	0	0	0
dme-mir-ITS1_33_57_+	33	57	.................................AAAATGGTGTATTTTTAATTTCTT............	24	AAAATGGTGTATTTTTAATTTCTT		0	0	0	0	0	0	0	0	0	0	0	4.2115	0	0	0	0	0	0	0	0	0	0	0		0	0	0	0	0	0	0	0	1.3386	0	0	0	0	0	0	0	0	0	0
dme-mir-ITS1_34_59_+	34	59	..................................AAATGGTGTATTTTTAATTTCTTTC..........	25	AAATGGTGTATTTTTAATTTCTTTC		0	0	0	0	0	0	0	0	0	1.1572	0	0	0	0	0	0	0	0	0	0	0	0	0		0	0	0	0	0	0	0	0	0.6693	0	0	0	0	0	0	0	0	0	0
dme-mir-ITS1_39_64_+	39	64	.......................................GTGTATTTTTAATTTCTTTCAATAA.....	25	GTGTATTTTTAATTTCTTTCAATAA		0.2326	0	0.0379	0	0	0	0	0	0	0	0	0	0	0	0	0	0	0	0.6444	0.8259	0.5023	0	0		0	0	0	0	0	0	0	0	0	0	0	0	0	0	0	0	0	0	0
dme-mir-ITS1_43_66_+	43	66	...........................................ATTTTTAATTTCTTTCAATAAAA...	23	ATTTTTAATTTCTTTCAATAAAA		0.0931	0.0501	0	0	0	0	0	0	0	0	0	0	0	0	0	0	0	0	0	0	0	0	0		0	0	0	0.1307	0	0	0	0	0	0	0	0	0	0	0	0	0	0	0
dme-mir-ITS1_3_25_+	3	25	...CATTTATTGAAGGAATTGATAT............................................	22	CATTTATTGAAGGAATTGATAT		0	0	0.0379	0	0	0	0	0	0	0	0	0	0	0	0	0	0	0	0	0	0	0	0		0	0	0	0	0	0	0	0	0	0	0	0	0	0	0	0	0	0	0
dme-mir-ITS1_13_33_+	13	33	.............AGGAATTGATATATGCCAGT....................................	20	AGGAATTGATATATGCCAGT		0.0465	0	0	0	0	0	0	0	0	0	0	0	0	0	0	0	0	0	0	0	0	0	0		0	0	0	0	0	0	0	0	0	0	0	0	0	0	0	0	0	0	0
dme-mir-ITS1_14_40_+	14	40	..............GGAATTGATATATGCCAGTAAAATGG.............................	26	GGAATTGATATATGCCAGTAAAATGG		0	0	0	0	0	0.1082	0	0	0	0	0	0	0	0	0	0	0	0	0	0	0	0	0		0	0	0	0	0	0	0	0	0	0	0	0	0	0	0	0	0	0	0
dme-mir-ITS1_20_39_+	20	39	....................GATATATGCCAGTAAAATG..............................	19	GATATATGCCAGTAAAATG		0	0	0	0	0	0	0	0	0	0	0	12.6347	0	0	0	0	0	23.3103	0.6444	0	0	0	0		0	0	0	0	0	0	0	0	0	0	0	0	0	0	0	0	0	0	0
dme-mir-ITS1_24_44_+	24	44	........................TATGCCAGTAAAATGGTGTA.........................	20	TATGCCAGTAAAATGGTGTA		0	0	0	0	0	0	0	0	0	0	2.3004	0	0	0	0	0	0	0	0	0	0	0	0		0	0	0	0	0	0	1.0865	4.4773	0	0	0	0	0	0	0	0	0	0	0
dme-mir-ITS1_31_52_+	31	52	...............................GTAAAATGGTGTATTTTTAAT.................	21	GTAAAATGGTGTATTTTTAAT		0	0	0	0	0	0	0	0	0	0	0	8.4231	0	0	0	0	0	5.8276	0	0	0	0	0		0.812	0	0	0	0	0	0	0	0	0	0	0	0	0	0	0	0	0	0
dme-mir-ITS1_39_62_+	39	62	.......................................GTGTATTTTTAATTTCTTTCAAT.......	23	GTGTATTTTTAATTTCTTTCAAT		0	0	0	0	0.0831	0	0	0.1791	0	0	0	4.2115	0	0	10.3645	0	0	0	1.2889	0	0	0	0		0	0	0	0	0	0	0	0	0	0	0	0	0	0	0	0	0	0	0
dme-mir-ITS1_2_20_+	2	20	..ACATTTATTGAAGGAATT.................................................	18	ACATTTATTGAAGGAATT		0	0	0	0	0	0	0	0	0	0	0	0	0	0	0	0	0	0	0	0	0	0	0		0	0	0	0	0	0	0	0	0	0	0	0	0	0	0	0	0	0	0
dme-mir-ITS1_3_27_+	3	27	...CATTTATTGAAGGAATTGATATAT..........................................	24	CATTTATTGAAGGAATTGATATAT		0	0	0	0.0517	0	0	0	0	0	0	1.1502	0	0	0	0	0	0	0	0	0	0	0	37.7986		0	0	0	0	0	0	0	0	0	0	0	0	0	0	0	0	2.5939	0	0
dme-mir-ITS1_3_26_+	3	26	...CATTTATTGAAGGAATTGATATA...........................................	23	CATTTATTGAAGGAATTGATATA		0	0	0	0	0.1663	0.2163	0	0	0	0	0	0	0	0	0	0	0	0	0	0	0	1.0137	0		0	0	0	0	0	0	0	0	0	0	0	0	0	0	0	0	0	0	0
dme-mir-ITS1_7_37_+	7	37	.......TATTGAAGGAATTGATATATGCCAGTAAAA................................	30	TATTGAAGGAATTGATATATGCCAGTAAAA		0	0	0	0	0	0	0	0	0	0	0	0	0	0	0	0	0	0	0	0	0	0	0		0	0	0	0	0	0	0	0	0	0	0	0	0	0	0	0	0	0	0
dme-mir-ITS1_11_36_+	11	36	...........GAAGGAATTGATATATGCCAGTAAA.................................	25	GAAGGAATTGATATATGCCAGTAAA		0	0	0	0	0	0	0	0.1791	0	0	0	0	0	0	0	0	7.3331	0	0	0	0	0	0		0	0	0	0	0	0	0	0	0	0	0	0	0	0	0	0	0	0	0
dme-mir-ITS1_13_37_+	13	37	.............AGGAATTGATATATGCCAGTAAAA................................	24	AGGAATTGATATATGCCAGTAAAA		0	0	0	0	0	0	0	0	0	0	0	0	0	0	0	0	0	0	0	0	0	0	0		0	0	0	0	0	0	0	0	0	0	0	0	0	0	0	0	0	0	0
dme-mir-ITS1_19_37_+	19	37	...................TGATATATGCCAGTAAAA................................	18	TGATATATGCCAGTAAAA		0	0	0	0	0	0	0	0	0	0	0	0	0	0	0	0	0	0	0	0	0	0	0		0	0	0	0	0	0	0	2.2387	0	0	0	0	0	0	0	0	0	0	0
dme-mir-ITS1_32_60_+	32	60	................................TAAAATGGTGTATTTTTAATTTCTTTCA.........	28	TAAAATGGTGTATTTTTAATTTCTTTCA		0	0	0	0	0	0	0	0	0	0	0	0	0	0	0	0	0	0	0	0	0	0	0		0	0	0	0	0	0	0	0	1.3386	0	0	0	0	0	0	0	0	0	0
dme-mir-ITS1_33_61_+	33	61	.................................AAAATGGTGTATTTTTAATTTCTTTCAA........	28	AAAATGGTGTATTTTTAATTTCTTTCAA		0	0	0	0	0	0	0	0	0	0	0	0	0	0	0	0	0	0	0	0	0	0	0		0	0	0	0	0	0	0	0	0	0	0	0	0	0	0	0	0	0	0
dme-mir-ITS1_38_61_+	38	61	......................................GGTGTATTTTTAATTTCTTTCAA........	23	GGTGTATTTTTAATTTCTTTCAA		0	0	0	0	0	0	0	0	0	0	0	0	0	0	0	0	0	0	0	0	0	0	0		0	0	0	0	0	0	0	0	0	0	0	0	0	0	0	0	0	0	0
dme-mir-ITS1_45_63_+	45	63	.............................................TTTTAATTTCTTTCAATA......	18	TTTTAATTTCTTTCAATA		0	0	0.0379	0	0	0.1082	0	0	0	0	0	0	0	0	0	0	0	0	0	0	0	0	0		0	0	0	0.1307	0	0	0	0	0	0	0	0	0	0	0	0	0	0	0
dme-mir-ITS1_3_21_+	3	21	...CATTTATTGAAGGAATTG................................................	18	CATTTATTGAAGGAATTG		0	0	0	0	0	0	0	0	0	0	0	0	0	0	0	0	0	0	0	0	0	1.0137	0		0	0	0	0	0	0	0	4.4773	0	0	0	0	0	0	0	0	0	0	0
dme-mir-ITS1_11_35_+	11	35	...........GAAGGAATTGATATATGCCAGTAA..................................	24	GAAGGAATTGATATATGCCAGTAA		0	0	0	0	0	0	0	0	0	0	0	0	0	0	0	0	0	0	0	0	0	0	0		0	0	0	0	0	0	0	0	0	0	0	0	0	0	0	0	0	0	0
dme-mir-ITS1_11_34_+	11	34	...........GAAGGAATTGATATATGCCAGTA...................................	23	GAAGGAATTGATATATGCCAGTA		0	0	0	0	0	0	0	0.0896	0	0	0	0	0	0	0	0	0	0	0	0	0	0	0		0	0	0	0	0.0562	0	0	2.2387	0	0	0	0	0	0	0	0	0	0	0
dme-mir-ITS1_12_39_+	12	39	............AAGGAATTGATATATGCCAGTAAAATG..............................	27	AAGGAATTGATATATGCCAGTAAAATG		0.0931	0	0	0	0	0	0	0.3583	0	0	0	0	0	0	0	0	0	0	0	0	0	0	0		0	0	0	0	0	0	0	0	0	0	0	0	0	0	0	0	0	0	0
dme-mir-ITS1_14_38_+	14	38	..............GGAATTGATATATGCCAGTAAAAT...............................	24	GGAATTGATATATGCCAGTAAAAT		0	0	0	0	0	0	0	0	0	0	0	0	0	0	20.729	0	0	0	0	0	0	0	0		0	0	0	0	0	0	0	0	2.6773	0	0	0	0	0	0	0	0	0	0
dme-mir-ITS1_17_38_+	17	38	.................ATTGATATATGCCAGTAAAAT...............................	21	ATTGATATATGCCAGTAAAAT		0	0	0	0	0	0	0	0	0	0	0	0	0	0	10.3645	0	0	0	0	0	0	0	0		0.406	0	0	0	0	0	0	2.2387	0	0	0	0	0	0	0	0	0	0	0
dme-mir-ITS1_26_51_+	26	51	..........................TGCCAGTAAAATGGTGTATTTTTAA..................	25	TGCCAGTAAAATGGTGTATTTTTAA		0	0	0	0	0	0	0	0	0	0	0	0	0	0	0	0	0	0	0	0	0	0	0		0	0	0	0	0	0	0	0	0	0	0	0	0	0	0	0	0	0	0
dme-mir-ITS1_26_50_+	26	50	..........................TGCCAGTAAAATGGTGTATTTTTA...................	24	TGCCAGTAAAATGGTGTATTTTTA		0	0	0	0	0	0	0	0	0	0	0	0	0	0	0	0	0	0	0	0	0	0	0		0	0	0	0	0	0	0	0	0	0	0	0	0	0	0	0	0	0	0
dme-mir-ITS1_26_46_+	26	46	..........................TGCCAGTAAAATGGTGTATT.......................	20	TGCCAGTAAAATGGTGTATT		0	0	0	0	0	0	0	0	0	0	0	0	0	0	0	0	0	0	0	0	0	0	0		0	0	0	0	0	0	0	0	0.6693	0	0	0	0	0	0	0	0	0	0
dme-mir-ITS1_30_52_+	30	52	..............................AGTAAAATGGTGTATTTTTAAT.................	22	AGTAAAATGGTGTATTTTTAAT		0	0	0	0	0	0	0	0	0	0	0	0	0	0	0	0	0	0	0	0	0	0	0		2.0299	0	0	0	0	0	0	0	0	0	0	0	0	0	0	0	0	0	0
dme-mir-ITS1_30_49_+	30	49	..............................AGTAAAATGGTGTATTTTT....................	19	AGTAAAATGGTGTATTTTT		0	0	0	0	0	0	0	0	0	0	0	4.2115	0	0	0	0	0	0	0	0	0	0	0		0	0	0	0	0.0281	0	0	0	0	0	0	0	0	0	0	0	0	0	0
dme-mir-ITS1_31_55_+	31	55	...............................GTAAAATGGTGTATTTTTAATTTC..............	24	GTAAAATGGTGTATTTTTAATTTC		0	0	0	0	0	0	0	0	0	0	0	0	0	0	0	0	0	0	0	0	0	0	0		0.406	0	0	0	0	0	2.173	0	0	0	0	0	0	0	0	0	0	0	0
dme-mir-ITS1_31_51_+	31	51	...............................GTAAAATGGTGTATTTTTAA..................	20	GTAAAATGGTGTATTTTTAA		0	0	0	0	0	0	0	0	0	0	2.3004	0	0	0	0	0	0	5.8276	0	0	0	0	0		0.406	0	0	0	0	0	0	2.2387	0	0	0	0	0	0	0	0	0	0	0
dme-mir-ITS1_35_60_+	35	60	...................................AATGGTGTATTTTTAATTTCTTTCA.........	25	AATGGTGTATTTTTAATTTCTTTCA		0	0	0	0	0	0	0	0	0	0	0	0	0	0	0	0	0	0	0	0	0	0	0		0	0	0	0	0	2.1004	0	0	0	0	0	0	0	0	0	0	0	0	0
dme-mir-ITS1_40_59_+	40	59	........................................TGTATTTTTAATTTCTTTC..........	19	TGTATTTTTAATTTCTTTC		0	0	0	0	0	0	0	0	0	0	0	0	0	0	0	0	0	0	0.6444	0	0	0	0		0.406	0	0	0.0327	0	0	0	0	0	0	0	0	0	0	0	0	0	0	0
dme-mir-ITS1_45_65_+	45	65	.............................................TTTTAATTTCTTTCAATAAA....	20	TTTTAATTTCTTTCAATAAA		0	0	0.0379	0.1035	0	0	0	0	0	0	0	0	0	0	0	0	0	0	1.2889	0	0	0	0		0	0	0	0.0327	0	0	0	0	0	0	0	0	0	0	0	0	0	0	0
dme-mir-ITS1_0_25_+	0	25	ATACATTTATTGAAGGAATTGATAT............................................	25	ATACATTTATTGAAGGAATTGATAT		0	0	0	0	0	0	0	0	0	0	0	0	0	0	0	0	0	0	0	0	0	0	0		0	0	0	0	0	0	0	0	0	0	0	0	0.618	0	0	0	0	0	0
dme-mir-ITS1_0_20_+	0	20	ATACATTTATTGAAGGAATT.................................................	20	ATACATTTATTGAAGGAATT		0	0	0	0	0	0	0	0	0	0	0	0	0	0	0	0	0	0	0	0	0	0	0		0	0	0	0	0	0	0	0	0	0	0	0	0	0	0	0	0	0	0
dme-mir-ITS1_2_24_+	2	24	..ACATTTATTGAAGGAATTGATA.............................................	22	ACATTTATTGAAGGAATTGATA		0	0	0	0.0517	0	0.1082	0	0.0896	0	0	0	0	0	0	0	0	0	0	0	0	0	2.0274	0		0	0	0	0	0	0	0	0	0	0	0	0	0	0	0	0	0	0	0
dme-mir-ITS1_8_35_+	8	35	........ATTGAAGGAATTGATATATGCCAGTAA..................................	27	ATTGAAGGAATTGATATATGCCAGTAA		0	0	0	0	0	0.2163	0.0743	0.2687	0	0	0	0	0	0	0	0	0	0	0	0	0	0	0		0	0	0	0	0	0	0	0	0	0	0	0	0	0	0	0	0	0	0
dme-mir-ITS1_9_38_+	9	38	.........TTGAAGGAATTGATATATGCCAGTAAAAT...............................	29	TTGAAGGAATTGATATATGCCAGTAAAAT		0	0	0	0	0	0.1082	0.0743	0	0	0	0	0	0	0	0	0	0	0	0	0	0.2511	0	0		0	0	0	0	0.0562	0	0	0	0	0	0	0	0	0	0	0	0	0	0
dme-mir-ITS1_18_44_+	18	44	..................TTGATATATGCCAGTAAAATGGTGTA.........................	26	TTGATATATGCCAGTAAAATGGTGTA		0	0	0	0	0	0	0	0	0	0	0	0	0	0	0	0	0	0	0	0	0	0	0		0	0	0	0	0.0842	0	0	0	0	0	0	0	0	0	0	0	0	0	0
dme-mir-ITS1_23_50_+	23	50	.......................ATATGCCAGTAAAATGGTGTATTTTTA...................	27	ATATGCCAGTAAAATGGTGTATTTTTA		0	0	0	0	0	0	0	0	0	0	0	0	0	0	0	0	0	0	0	0	0	0	0		0	0	0	0	0	0	0	0	0	0	0	0	0	0	0	0	0	0	0
dme-mir-ITS1_23_47_+	23	47	.......................ATATGCCAGTAAAATGGTGTATTT......................	24	ATATGCCAGTAAAATGGTGTATTT		0	0	0	0	0	0	0	0	0	0	0	0	0	0	0	0	0	0	0	0	0	0	0		0	0	0	0	0	0	0	0	1.3386	0	0	0	0	0	0	0	0	0	0
dme-mir-ITS1_30_48_+	30	48	..............................AGTAAAATGGTGTATTTT.....................	18	AGTAAAATGGTGTATTTT		0	0	0	0	0	0	0	0	0	0	0	0	0	0	0	0	0	0	0	0	0	0	0		1.218	0	0	0	0.0842	0	0	0	0	0	0	0	0	0	0	0	0	0	0
dme-mir-ITS1_34_60_+	34	60	..................................AAATGGTGTATTTTTAATTTCTTTCA.........	26	AAATGGTGTATTTTTAATTTCTTTCA		0	0	0	0	0	0	0	0	0	0	0	0	0	0	0	0	0	0	0	0	0	0	0		0	0	0	0	0	0	0	0	0	0	0	0	0	0	0	0	0	0	0
dme-mir-ITS1_34_58_+	34	58	..................................AAATGGTGTATTTTTAATTTCTTT...........	24	AAATGGTGTATTTTTAATTTCTTT		0	0	0	0	0	0	0	0	0	0	0	0	0	0	0	0	0	0	0	0	0	0	0		0	0	0	0	0	0	0	0	0	0	0	0	0	0	0	0	0	0	0
dme-mir-ITS1_36_61_+	36	61	....................................ATGGTGTATTTTTAATTTCTTTCAA........	25	ATGGTGTATTTTTAATTTCTTTCAA		0	0	0	0	0	0	0	0	0	0	0	4.2115	0	0	0	0	0	0	0	0	0	0	0		0	0	0	0	0	0	0	0	2.008	0	0	0	0	0	0	0	0	0	0
dme-mir-ITS1_37_57_+	37	57	.....................................TGGTGTATTTTTAATTTCTT............	20	TGGTGTATTTTTAATTTCTT		0	0	0	0	0	0	0	0	0	0	1.1502	0	0	0	0	0	0	0	0	0	0	0	0		0	0	0	0	0.0281	0	0	0	0	0	0	0	0	0	0	0	0	0	0
dme-mir-ITS1_39_66_+	39	66	.......................................GTGTATTTTTAATTTCTTTCAATAAAA...	27	GTGTATTTTTAATTTCTTTCAATAAAA		0.0931	0	0	0	0	0	0	0	0	0	0	0	0	0	0	0	0	0	0	2.4777	0.2511	0	0		0	0	0	0	0	0	0	0	0	0	0	0	0	0	0	0	0	0	0
dme-mir-ITS1_41_67_+	41	67	.........................................GTATTTTTAATTTCTTTCAATAAAAA..	26	GTATTTTTAATTTCTTTCAATAAAAA		0	0	0	0	0	0	0.0743	0	0	2.3145	0	0	0	0	0	0	0	0	0	0	0	0	0		0	0	0	0.0654	0	0	0	0	0	0	0	0	0	0	0	0	0	0	0
dme-mir-ITS1_41_59_+	41	59	.........................................GTATTTTTAATTTCTTTC..........	18	GTATTTTTAATTTCTTTC		0	0	0	0	0	0	0	0	0	0	0	4.2115	0	0	20.729	0	0	0	0	0	0	0	0		0	0	0	0	0	0	0	0	0	0	0	0	0	0	0	0	0	0	0
dme-mir-ITS1_3_33_+	3	33	...CATTTATTGAAGGAATTGATATATGCCAGT....................................	30	CATTTATTGAAGGAATTGATATATGCCAGT		0	0	0	0	0	0	0	0	0	0	0	0	0	0	0	0	0	0	0	0	0	0	0		0	0	0	0	0	0	0	0	0	0	0	0	0	0	0	0	0	0	0
dme-mir-ITS1_3_22_+	3	22	...CATTTATTGAAGGAATTGA...............................................	19	CATTTATTGAAGGAATTGA		0	0	0	0	0	0	0	0	0	0	0	4.2115	0	0	10.3645	0	0	0	0	0	0	0	0		0	0	0	0	0	0	0	0	0	0	0	0	0	0	0	0	0	0	0
dme-mir-ITS1_5_34_+	5	34	.....TTTATTGAAGGAATTGATATATGCCAGTA...................................	29	TTTATTGAAGGAATTGATATATGCCAGTA		0	0	0	0	0	0	0	0	0	0	0	0	0	0	0	0	0	0	0	0	0	0	0		0	0	0	0	0.0281	0	0	0	0	0	0	0	0	0	0	0	0	0	0
dme-mir-ITS1_12_40_+	12	40	............AAGGAATTGATATATGCCAGTAAAATGG.............................	28	AAGGAATTGATATATGCCAGTAAAATGG		0	0	0	0	0	0.2163	0	0.1791	0	0	0	0	0	0	0	0	0	0	0	0	0	0	0		0	0	0	0	0	0	0	0	0	0	0	0	0	0	0	0	0	0	0
dme-mir-ITS1_15_38_+	15	38	...............GAATTGATATATGCCAGTAAAAT...............................	23	GAATTGATATATGCCAGTAAAAT		0	0	0	0	0	0	0	0	0	0	0	0	0	0	0	0	0	0	0	0	0	0	0		0	0	0	0	0	0	0	0	2.6773	0	0	0	0	0	0	0	0	0	0
dme-mir-ITS1_17_35_+	17	35	.................ATTGATATATGCCAGTAA..................................	18	ATTGATATATGCCAGTAA		0	0	0	0	0	0	0	0	0	0	0	0	0	0	0	0	0	0	0	0	0	0	0		0	0	0	0	0	0	0	4.4773	1.3386	0	0	0	0	0	0	0	0	0	0
dme-mir-ITS1_20_38_+	20	38	....................GATATATGCCAGTAAAAT...............................	18	GATATATGCCAGTAAAAT		0	0	0	0	0	0	0	0	0	0	1.1502	4.2115	0	0	0	0	0	11.6551	0	0	0	0	0		0	0	0	0	0	0	0	2.2387	0	0	0	0	0	0	0	0	0	0	0
dme-mir-ITS1_24_47_+	24	47	........................TATGCCAGTAAAATGGTGTATTT......................	23	TATGCCAGTAAAATGGTGTATTT		0	0	0	0	0	0	0	0	0	0	0	0	0	0	0	0	0	0	0	0	0	0	0		0	0	0	0	0	0	0	2.2387	0	0	0	0	0	0	0	0	0	0	0
dme-mir-ITS1_24_46_+	24	46	........................TATGCCAGTAAAATGGTGTATT.......................	22	TATGCCAGTAAAATGGTGTATT		0	0	0	0	0	0	0	0	0	0	0	0	0	0	10.3645	0	0	0	0	0	0	0	0		0	0	0	0	0	0	0	0	2.6773	0	0	0	0	0	0	0	0	0	0
dme-mir-ITS1_25_44_+	25	44	.........................ATGCCAGTAAAATGGTGTA.........................	19	ATGCCAGTAAAATGGTGTA		0	0	0	0	0	0	0	0	0	0	0	0	0	0	0	0	0	0	0	0	0	0	0		0	0	0	0	0	0	0	2.2387	0	0	0	0	0	0	0	0	0	0	0
dme-mir-ITS1_28_48_+	28	48	............................CCAGTAAAATGGTGTATTTT.....................	20	CCAGTAAAATGGTGTATTTT		0	0	0	0	0	0	0	0	0	0	0	0	0	0	0	0	0	0	0	0	0	0	0		0	0	0	0	0	0	0	0	0	0	0	0	0	0	0	0	0	0	0
dme-mir-ITS1_29_49_+	29	49	.............................CAGTAAAATGGTGTATTTTT....................	20	CAGTAAAATGGTGTATTTTT		0	0	0	0	0	0	0	0	0	0	0	0	0	0	0	0	0	0	0	0	0	0	0		0.406	0	0	0	0	0	0	0	0	0	0	0	0	0	0	0	0	0	0
dme-mir-ITS1_30_55_+	30	55	..............................AGTAAAATGGTGTATTTTTAATTTC..............	25	AGTAAAATGGTGTATTTTTAATTTC		0	0	0	0	0	0	0	0	0	0	0	4.2115	0	0	0	0	0	0	0	0	0	0	0		0	0	0	0	0	0	0	0	1.3386	0	0	0	0	0	0	0	0	0	0
dme-mir-ITS1_30_50_+	30	50	..............................AGTAAAATGGTGTATTTTTA...................	20	AGTAAAATGGTGTATTTTTA		0	0	0	0	0	0	0	0	0	0	0	0	0	0	0	0	0	0	0	0	0	0	0		0.406	0	0	0	0	0	0	0	0	0	0	0	0	0	0	0	0	0	0
dme-mir-ITS1_33_58_+	33	58	.................................AAAATGGTGTATTTTTAATTTCTTT...........	25	AAAATGGTGTATTTTTAATTTCTTT		0	0	0	0	0	0	0	0	0	0	0	0	0	0	0	0	0	0	0	0	0	0	0		0	0	0	0	0	0	0	0	0	0	0	0	0	0	0	0	0	0	0
dme-mir-ITS1_36_63_+	36	63	....................................ATGGTGTATTTTTAATTTCTTTCAATA......	27	ATGGTGTATTTTTAATTTCTTTCAATA		0	0	0	0.0517	0	0	0	0	0	0	0	0	0	0	0	0	0	0	0	0	0	0	0		0	0	0	0	0	0	0	0	0	0	0	0	0	0	0	0	0	0	0
dme-mir-ITS1_38_66_+	38	66	......................................GGTGTATTTTTAATTTCTTTCAATAAAA...	28	GGTGTATTTTTAATTTCTTTCAATAAAA		0	0	0	0	0	0	0	0	0	0	0	0	0	0	0	0	0	0	0	1.6518	0.5023	0	0		0.406	0	0	0	0	0	0	0	0	0	0	0	0	0	0	0	0	0	0
dme-mir-ITS1_38_56_+	38	56	......................................GGTGTATTTTTAATTTCT.............	18	GGTGTATTTTTAATTTCT		0	0	0	0	0	0	0	0	0	0	1.1502	0	0	0	0	0	0	0	0	0	0	0	0		0	0	0	0	0	0	0	2.2387	0	0	0	0	0	0	0	0	0	0	0
dme-mir-ITS1_3_23_+	3	23	...CATTTATTGAAGGAATTGAT..............................................	20	CATTTATTGAAGGAATTGAT		0	0	0	0	0	0	0	0	0	0	1.1502	0	0	0	0	0	0	0	0	0	0	1.0137	0		0	0	0	0	0	2.1004	0	0	0	0	0	0	0	0	0	0	0	0	0
dme-mir-ITS1_6_35_+	6	35	......TTATTGAAGGAATTGATATATGCCAGTAA..................................	29	TTATTGAAGGAATTGATATATGCCAGTAA		0	0	0	0	0	0	0	0	0	0	0	0	0	0	0	0	0	0	0	0.8259	0.2511	0	0		0	0	0	0	0	0	0	0	0	0	0	0	0	0	0	0	0	0	0
dme-mir-ITS1_8_38_+	8	38	........ATTGAAGGAATTGATATATGCCAGTAAAAT...............................	30	ATTGAAGGAATTGATATATGCCAGTAAAAT		0	0	0	0	0	0	0	0	0	0	0	0	0	0	0	0	0	0	0	2.4777	0	0	0		0	0	0	0	0	0	0	0	0	0	0	0	0	0	0	0	0	0	0
dme-mir-ITS1_13_39_+	13	39	.............AGGAATTGATATATGCCAGTAAAATG..............................	26	AGGAATTGATATATGCCAGTAAAATG		0	0	0	0	0	0	0	0.0896	0	0	0	0	0	0	0	0	0	0	0	0.8259	0	0	0		0	0	0	0	0	0	0	0	0	0	0	0	0	0	0	0	0	0	0
dme-mir-ITS1_14_35_+	14	35	..............GGAATTGATATATGCCAGTAA..................................	21	GGAATTGATATATGCCAGTAA		0	0	0	0	0	0	0	0	0	0	0	0	0	0	0	0	0	5.8276	0	0	0	0	0		0	0	0	0	0	0	0	4.4773	0	0	0	0	0	0	0	0	0	0	0
dme-mir-ITS1_14_34_+	14	34	..............GGAATTGATATATGCCAGTA...................................	20	GGAATTGATATATGCCAGTA		0	0	0	0	0	0	0	0	0	0	0	0	0	0	0	0	0	0	0	0	0	0	0		0	0	0	0	0	0	0	0	1.3386	0	0	0	0	0	0	0	0	0	0
dme-mir-ITS1_18_43_+	18	43	..................TTGATATATGCCAGTAAAATGGTGT..........................	25	TTGATATATGCCAGTAAAATGGTGT		0	0	0	0	0	0	0	0.0896	0	0	0	0	0	0	0	0	0	0	0	0	0	0	0		0	0	0	0	0	0	0	0	0	0	0	0	0	0	0	0	0	0	0
dme-mir-ITS1_22_44_+	22	44	......................TATATGCCAGTAAAATGGTGTA.........................	22	TATATGCCAGTAAAATGGTGTA		0	0	0	0	0	0	0	0	0	0	0	0	0	0	10.3645	0	0	0	0	0	0	0	0		0	0	0	0	0	0	0	0	0	0	0	0	0	0	0	0	0	0	0
dme-mir-ITS1_24_51_+	24	51	........................TATGCCAGTAAAATGGTGTATTTTTAA..................	27	TATGCCAGTAAAATGGTGTATTTTTAA		0	0	0	0	0	0	0	0	0	0	0	0	0	0	0	0	0	0	0	0	0	0	0		0	0	0	0	0	0	0	0	0	0	0	0	0	0	0	0	0	0	0
dme-mir-ITS1_24_48_+	24	48	........................TATGCCAGTAAAATGGTGTATTTT.....................	24	TATGCCAGTAAAATGGTGTATTTT		0	0	0	0	0	0	0	0	0	0	0	0	0	0	0	0	0	0	0	0	0	0	0		0	0	0	0	0	0	0	2.2387	0	0	0	0	0	0	0	0	0	0	0
dme-mir-ITS1_24_45_+	24	45	........................TATGCCAGTAAAATGGTGTAT........................	21	TATGCCAGTAAAATGGTGTAT		0	0	0	0	0	0	0	0	0	0	0	0	0	0	0	0	0	0	0	0	0	0	0		0	0	0	0	0	0	0	0	2.6773	0	0	0	0	0	0	0	0	0	0
dme-mir-ITS1_26_48_+	26	48	..........................TGCCAGTAAAATGGTGTATTTT.....................	22	TGCCAGTAAAATGGTGTATTTT		0	0	0	0	0	0	0	0	0	0	0	0	0	0	0	0	0	0	0	0	0	0	0		0	0	0	0	0	0	0	0	0	0	0	0	0	0	0	0	0	0	0
dme-mir-ITS1_27_48_+	27	48	...........................GCCAGTAAAATGGTGTATTTT.....................	21	GCCAGTAAAATGGTGTATTTT		0	0	0	0	0	0	0	0	0	0	0	0	0	0	0	0	0	0	0	0	0	0	0		0	0	0	0	0	0	0	0	0	0	0	0	0	0	0	0	0	0	0
dme-mir-ITS1_27_45_+	27	45	...........................GCCAGTAAAATGGTGTAT........................	18	GCCAGTAAAATGGTGTAT		0	0	0	0	0	0	0	0	0	0	0	4.2115	0	0	0	0	0	0	0	0	0	0	0		0	0	0	0	0	0	0	0	0	0	0	0	0	0	0	0	0	0	0
dme-mir-ITS1_29_52_+	29	52	.............................CAGTAAAATGGTGTATTTTTAAT.................	23	CAGTAAAATGGTGTATTTTTAAT		0	0	0	0	0	0	0	0	0	0	1.1502	0	0	0	0	0	0	0	0	0	0	0	0		0	0.046	0	0	0	0	0	0	0	0	0	0	0	0	0	0	0	0	0
dme-mir-ITS1_29_51_+	29	51	.............................CAGTAAAATGGTGTATTTTTAA..................	22	CAGTAAAATGGTGTATTTTTAA		0	0	0	0	0	0	0	0	0	0	1.1502	0	0	0	10.3645	0	0	0	0	0	0	0	0		0.406	0	0	0	0	0	0	0	0	0	0	0	0	0	0	0	0	0	0
dme-mir-ITS1_31_54_+	31	54	...............................GTAAAATGGTGTATTTTTAATTT...............	23	GTAAAATGGTGTATTTTTAATTT		0	0	0	0	0	0	0	0	0	0	0	0	0	0	0	0	0	0	0	0	0	0	0		0	0	0	0	0	0	0	0	0	0	0	0	0	0	0	0	0	0	0
dme-mir-ITS1_31_53_+	31	53	...............................GTAAAATGGTGTATTTTTAATT................	22	GTAAAATGGTGTATTTTTAATT		0	0	0	0	0	0	0	0	0	0	0	0	0	0	0	0	0	0	0	0	0	0	0		0	0	0	0	0	0	0	0	0	0	0	0	0	0	0	0	0	0	0
dme-mir-ITS1_32_62_+	32	62	................................TAAAATGGTGTATTTTTAATTTCTTTCAAT.......	30	TAAAATGGTGTATTTTTAATTTCTTTCAAT		0	0	0	0	0	0	0	0	0	0	0	0	0	0	0	0	0	0	0	0	0	0	0		0	0	0	0	0	0	0	0	0	0	0	0	0	0	0	0	0	0	0
dme-mir-ITS1_32_61_+	32	61	................................TAAAATGGTGTATTTTTAATTTCTTTCAA........	29	TAAAATGGTGTATTTTTAATTTCTTTCAA		0	0	0	0	0	0	0	0	0	0	0	0	0	0	0	0	0	0	0	0	0	0	0		0	0	0	0	0	0	0	0	0	0	0	0	0	0	0	0	0	0	0
dme-mir-ITS1_32_50_+	32	50	................................TAAAATGGTGTATTTTTA...................	18	TAAAATGGTGTATTTTTA		0	0	0	0	0	0	0	0	0	0	0	0	0	0	10.3645	0	0	0	0	0	0	0	0		0	0	0	0	0	0	0	2.2387	0	0	0	0	0	0	0	0	0	0	0
dme-mir-ITS1_33_60_+	33	60	.................................AAAATGGTGTATTTTTAATTTCTTTCA.........	27	AAAATGGTGTATTTTTAATTTCTTTCA		0	0	0	0	0	0	0	0	0	0	0	0	0	0	0	0	0	0	0	0	0	0	0		0	0	0	0	0	0	0	0	0	0	0	0	0	0	0	0	0	0	0
dme-mir-ITS1_34_56_+	34	56	..................................AAATGGTGTATTTTTAATTTCT.............	22	AAATGGTGTATTTTTAATTTCT		0	0	0	0	0	0	0	0	2.6734	0	0	0	0	0	0	0	0	0	0	0	0	0	0		0	0	0	0	0.0562	0	0	0	0	0	0	0	0	0	0	0	0	0	0
dme-mir-ITS1_34_54_+	34	54	..................................AAATGGTGTATTTTTAATTT...............	20	AAATGGTGTATTTTTAATTT		0	0	0	0	0	0	0	0	0	0	0	0	0	0	0	0	0	0	0	0	0	0	0		0	0	0	0	0	0	0	0	0	0	0	0	0	0	0	0	0	0	0
dme-mir-ITS1_36_56_+	36	56	....................................ATGGTGTATTTTTAATTTCT.............	20	ATGGTGTATTTTTAATTTCT		0	0	0	0	0	0	0	0	0	0	0	4.2115	0	0	0	0	0	0	0	0	0	0	0		0	0	0	0	0.0281	0	0	0	0	0	0	0	0	0	0	0	0	0	0
dme-mir-ITS1_42_66_+	42	66	..........................................TATTTTTAATTTCTTTCAATAAAA...	24	TATTTTTAATTTCTTTCAATAAAA		0	0	0.0379	0	0	0	0	0	0	0	0	0	0	0	0	0	0	0	0	0	0	0	0		0	0	0	0.0654	0	0	0	0	0	0	0	0	0	0	0	0	0	0	0
dme-mir-ITS1_45_67_+	45	67	.............................................TTTTAATTTCTTTCAATAAAAA..	22	TTTTAATTTCTTTCAATAAAAA		0	0	0	0	0	0	0	0	0	0	0	0	0	0	0	0	0	0	0	1.6518	0.5023	0	0		0	0	0	0	0	0	0	0	0	0	0	0	0	0	0	0	0	0	0
dme-mir-ITS1_48_67_+	48	67	................................................TAATTTCTTTCAATAAAAA..	19	TAATTTCTTTCAATAAAAA		0	0	0	0	0	0	0	0	0	0	0	0	0	0	0	0	0	0	0	0	0	0	0		0	0	0	0	0	0	0	0	0	0	0	0	0	0	0	0	0	0	0
dme-mir-ITS1_48_66_+	48	66	................................................TAATTTCTTTCAATAAAA...	18	TAATTTCTTTCAATAAAA		0	0	0	0	0	0	0	0	0	0	0	0	0	0	0	0	0	0	0	0	0	0	0		0	0	0	0	0	0	0	0	0	0	0	0	0	0	0	0	0	0	0
dme-mir-ITS1_2_30_+	2	30	..ACATTTATTGAAGGAATTGATATATGCC.......................................	28	ACATTTATTGAAGGAATTGATATATGCC		0	0	0	0	0	0.2163	0	0	0	0	0	0	0	0	0	0	0	0	0	0	0	0	0		0	0	0	0	0	0	0	0	0	0	0	0	0	0	0	0	0	0	0
dme-mir-ITS1_5_35_+	5	35	.....TTTATTGAAGGAATTGATATATGCCAGTAA..................................	30	TTTATTGAAGGAATTGATATATGCCAGTAA		0	0	0	0	0	0	0	0	0	0	0	0	0	0	0	0	0	0	0	0	0	0	0		0	0	0	0	0	0	0	0	0	0	0	0	0	0	0	0	0	0	0
dme-mir-ITS1_11_39_+	11	39	...........GAAGGAATTGATATATGCCAGTAAAATG..............................	28	GAAGGAATTGATATATGCCAGTAAAATG		0	0	0	0	0	0	0	0	0	0	0	0	0	0	0	0	0	0	0	0	0.2511	0	0		0	0	0	0	0	0	0	0	0	0	0	0	0	0	0	0	0	0	0
dme-mir-ITS1_12_35_+	12	35	............AAGGAATTGATATATGCCAGTAA..................................	23	AAGGAATTGATATATGCCAGTAA		0	0.0501	0	0	0	0	0	0.0896	0	0	0	4.2115	0	0	0	0	0	0	0	0	0	0	0		0	0	0	0	0	0	0	0	0	0	0	0	0	0	0	0	0	0	0
dme-mir-ITS1_12_32_+	12	32	............AAGGAATTGATATATGCCAG.....................................	20	AAGGAATTGATATATGCCAG		0	0	0	0.0517	0	0	0	0	0	0	0	0	0	0	0	0	0	0	0	0	0	0	0		0	0	0	0	0	0	0	0	0	0	0	0	0	0	0	0	0	0	0
dme-mir-ITS1_13_36_+	13	36	.............AGGAATTGATATATGCCAGTAAA.................................	23	AGGAATTGATATATGCCAGTAAA		0	0	0	0.0517	0	0	0	0	0	0	0	0	0	0	0	0	0	0	0	0	0	0	0		0	0	0	0	0	0	0	0	0	0	0	0	0	0	0	0	0	0	0
dme-mir-ITS1_13_32_+	13	32	.............AGGAATTGATATATGCCAG.....................................	19	AGGAATTGATATATGCCAG		0	0	0	0	0	0	0	0	0	0	0	4.2115	0	0	0	0	0	0	0	0	0	0	0		0	0	0	0	0	0	0	0	0	0	0	0	0	0	0	0	0	0	0
dme-mir-ITS1_15_42_+	15	42	...............GAATTGATATATGCCAGTAAAATGGTG...........................	27	GAATTGATATATGCCAGTAAAATGGTG		0	0	0	0	0	0	0	0	0	0	0	0	0	0	0	0	0	0	0	0	0	0	0		0	0	0	0	0	0	0	0	0	0	0	0	0	0	0	0	0	0	0
dme-mir-ITS1_15_39_+	15	39	...............GAATTGATATATGCCAGTAAAATG..............................	24	GAATTGATATATGCCAGTAAAATG		0	0	0	0	0	0	0	0	0	0	1.1502	0	0	0	0	0	7.3331	0	0	0	0	0	0		0	0	0	0	0	0	0	0	0	0	0	0	0	0	0	0	0	0	0
dme-mir-ITS1_16_38_+	16	38	................AATTGATATATGCCAGTAAAAT...............................	22	AATTGATATATGCCAGTAAAAT		0	0	0	0	0	0	0	0	0	0	0	0	0	0	0	0	0	0	0	0	0	0	0		0	0	0	0	0	0	0	0	0	0	0	0	0	0	0	0	0	0	0
dme-mir-ITS1_19_46_+	19	46	...................TGATATATGCCAGTAAAATGGTGTATT.......................	27	TGATATATGCCAGTAAAATGGTGTATT		0	0	0	0	0	0	0	0	0	0	0	0	0	0	0	0	0	0	0	0	0	0	0		0	0	0	0	0	0	0	0	0.6693	0	0	0	0	0	0	0	0	0	0
dme-mir-ITS1_20_46_+	20	46	....................GATATATGCCAGTAAAATGGTGTATT.......................	26	GATATATGCCAGTAAAATGGTGTATT		0	0	0	0	0	0	0	0	0	0	0	0	0	0	0	0	0	0	0	0	0	0	0		0	0	0	0	0	0	0	0	0	0	0	0	0	0	0	0	0	0	0
dme-mir-ITS1_22_46_+	22	46	......................TATATGCCAGTAAAATGGTGTATT.......................	24	TATATGCCAGTAAAATGGTGTATT		0	0	0	0	0	0	0	0	0	1.1572	0	0	0	0	0	0	0	0	0	0	0	0	0		0	0	0	0	0	0	0	0	0	0	0	0	0	0	0	0	0	0	0
dme-mir-ITS1_23_43_+	23	43	.......................ATATGCCAGTAAAATGGTGT..........................	20	ATATGCCAGTAAAATGGTGT		0	0	0	0	0	0	0	0	0	0	0	4.2115	0	0	0	0	0	0	0	0	0	0	0		0	0	0	0	0	0	0	0	0	0	0	0	0	0	0	0	0	0	0
dme-mir-ITS1_28_52_+	28	52	............................CCAGTAAAATGGTGTATTTTTAAT.................	24	CCAGTAAAATGGTGTATTTTTAAT		0	0	0	0	0	0	0	0	0	0	0	4.2115	0	0	0	0	0	0	0	0	0	0	0		0	0	0	0	0	0	0	2.2387	0	0	0	0	0	0	0	0	0	0	0
dme-mir-ITS1_29_56_+	29	56	.............................CAGTAAAATGGTGTATTTTTAATTTCT.............	27	CAGTAAAATGGTGTATTTTTAATTTCT		0	0	0	0	0	0	0	0.0896	0	0	0	0	0	0	0	0	0	0	0	0	0	0	0		0	0	0	0	0	0	0	0	0	0	0	0	0	0	0	0	0	0	0
dme-mir-ITS1_29_55_+	29	55	.............................CAGTAAAATGGTGTATTTTTAATTTC..............	26	CAGTAAAATGGTGTATTTTTAATTTC		0	0	0	0	0	0	0	0	0	0	0	0	0	0	0	0	0	0	0	0	0	0	0		0	0	0	0	0	0	0	0	2.008	0	0	0	0	0	0	0	0	0	0
dme-mir-ITS1_29_47_+	29	47	.............................CAGTAAAATGGTGTATTT......................	18	CAGTAAAATGGTGTATTT		0	0	0	0	0	0	0	0	0	0	0	0	0	0	10.3645	0	0	5.8276	0	0	0	0	0		0	0	0	0	0	0	0	0	0	0	0	0	0	0	0	0	0	0	0
dme-mir-ITS1_30_54_+	30	54	..............................AGTAAAATGGTGTATTTTTAATTT...............	24	AGTAAAATGGTGTATTTTTAATTT		0	0	0	0	0	0	0	0	0	0	0	0	0	0	0	0	0	0	0	0	0	0	0		0	0	0	0	0	0	0	0	1.3386	0	0	0	0	0	0	0	0	0	0
dme-mir-ITS1_30_53_+	30	53	..............................AGTAAAATGGTGTATTTTTAATT................	23	AGTAAAATGGTGTATTTTTAATT		0	0	0	0	0	0	0	0	0	0	1.1502	0	0	0	0	0	0	5.8276	0	0	0	0	0		0	0	0	0	0	0	0	0	0	0	0	0	0	0	0	0	0	0	0
dme-mir-ITS1_35_63_+	35	63	...................................AATGGTGTATTTTTAATTTCTTTCAATA......	28	AATGGTGTATTTTTAATTTCTTTCAATA		0	0	0	0	0	0	0	0	0	0	0	0	0	0	0	0	0	0	0	0	0	0	0		0	0.046	0	0.0327	0	0	0	0	0	0	0	0	0	0	0	0	0	0	0
dme-mir-ITS1_35_62_+	35	62	...................................AATGGTGTATTTTTAATTTCTTTCAAT.......	27	AATGGTGTATTTTTAATTTCTTTCAAT		0	0	0	0	0	0	0	0	0	0	0	0	0	0	0	0	0	0	0	0	0	0	0		0	0	0	0	0	0	0	0	0	0	0	0	0	0	0	0	0	0	0
dme-mir-ITS1_36_62_+	36	62	....................................ATGGTGTATTTTTAATTTCTTTCAAT.......	26	ATGGTGTATTTTTAATTTCTTTCAAT		0	0	0	0	0	0	0	0	0	0	1.1502	0	0	0	0	0	0	0	0	0	0	0	0		0	0	0	0	0	0	0	0	0	0	0	0	0	0	0	0	0	0	0
dme-mir-ITS1_36_58_+	36	58	....................................ATGGTGTATTTTTAATTTCTTT...........	22	ATGGTGTATTTTTAATTTCTTT		0	0	0	0	0	0	0	0	0	0	0	0	0	0	10.3645	0	0	0	0	0	0	0	0		0	0	0	0	0	0	0	0	0.6693	0	0	0	0	0	0	0	0	0	0
dme-mir-ITS1_36_54_+	36	54	....................................ATGGTGTATTTTTAATTT...............	18	ATGGTGTATTTTTAATTT		0	0	0	0	0	0	0	0	0	0	0	0	0	0	0	0	0	0	0	0	0	0	0		0	0	0	0	0	0	0	0	0	0	0	0	0	0	0	0	0	0	0
dme-mir-ITS1_38_58_+	38	58	......................................GGTGTATTTTTAATTTCTTT...........	20	GGTGTATTTTTAATTTCTTT		0	0	0	0	0	0	0	0	0	0	0	0	0	0	0	0	0	0	0	0	0	0	0		0	0	0	0	0	0	0	0	2.008	0	0	0	0	0	0	0	0	0	0
dme-mir-ITS1_39_65_+	39	65	.......................................GTGTATTTTTAATTTCTTTCAATAAA....	26	GTGTATTTTTAATTTCTTTCAATAAA		0.0465	0	0	0	0	0	0	0	0	0	0	0	0	0	0	0	0	0	0	0.8259	0.2511	0	0		0	0	0	0	0	0	0	0	0	0	0	0	0	0	0	0	0	0	0
dme-mir-ITS1_40_58_+	40	58	........................................TGTATTTTTAATTTCTTT...........	18	TGTATTTTTAATTTCTTT		0	0	0	0	0	0	0	0	0	0	0	0	0	0	0	0	0	0	0.6444	0	0	0	0		0	0	0	0.0654	0	0	0	0	0	0	0	0	0	0	0	0	0	0	0
dme-mir-ITS1_42_61_+	42	61	..........................................TATTTTTAATTTCTTTCAA........	19	TATTTTTAATTTCTTTCAA		0	0	0	0	0	0	0	0	0	0	0	0	0	0	0	0	0	0	0	0	0	0	0		0	0	0	0.098	0	0	0	0	0	0	0	0	0	0	0	0	0	0	0
dme-mir-ITS1_44_63_+	44	63	............................................TTTTTAATTTCTTTCAATA......	19	TTTTTAATTTCTTTCAATA		0	0	0	0	0	0	0	0	0	0	0	0	0	0	0	0	0	0	0	0	0	0	0		0	0	0	0.098	0	0	0	0	0	0	0	0	0	0	0	0	0	0	0
dme-mir-ITS1_45_66_+	45	66	.............................................TTTTAATTTCTTTCAATAAAA...	21	TTTTAATTTCTTTCAATAAAA		0	0	0	0	0	0	0	0	0	0	0	0	0	0	0	0	0	0	0	0	0.5023	0	0		0	0	0	0	0	0	0	0	0	0	0	0	0	0	0	0	0	0	0
dme-mir-ITS1_46_65_+	46	65	..............................................TTTAATTTCTTTCAATAAA....	19	TTTAATTTCTTTCAATAAA		0	0	0	0	0	0	0	0	0	0	0	0	0	0	0	0	0	0	0.6444	0	0	0	0		0	0	0	0	0	0	0	0	0	0	0	0	0	0	0	0	0	0	0
dme-mir-ITS1_47_66_+	47	66	...............................................TTAATTTCTTTCAATAAAA...	19	TTAATTTCTTTCAATAAAA		0	0	0	0	0	0	0	0	0	0	0	0	0	0	0	0	0	0	0.6444	0	0	0	0		0	0	0	0	0	0	0	0	0	0	0	0	0	0	0	0	0	0	0
dme-mir-ITS1_47_65_+	47	65	...............................................TTAATTTCTTTCAATAAA....	18	TTAATTTCTTTCAATAAA		0	0	0	0	0	0	0	0	0	0	0	0	0	0	0	0	0	0	0	0	0	0	0		0	0	0	0	0.0281	0	0	4.4773	0	0	0	0	0	0	0	0	0	0	0
dme-mir-ITS1_1_31_+	1	31	.TACATTTATTGAAGGAATTGATATATGCCA......................................	30	TACATTTATTGAAGGAATTGATATATGCCA		0	0	0	0	0	0	0	0	0	0	0	0	0	0	0	0	0	0	0	0	0	0	0		0	0	0	0	0	0	0	0	0	0	0	0	0	0	0	0	0	0	0
dme-mir-ITS1_3_32_+	3	32	...CATTTATTGAAGGAATTGATATATGCCAG.....................................	29	CATTTATTGAAGGAATTGATATATGCCAG		0	0	0	0	0	0	0	0	0	0	0	0	0	0	0	0	0	0	0	0	0	0	0		0	0	0	0	0	0	0	0	0	0	0	0	0	0	0	0	0	0	0
dme-mir-ITS1_4_34_+	4	34	....ATTTATTGAAGGAATTGATATATGCCAGTA...................................	30	ATTTATTGAAGGAATTGATATATGCCAGTA		0	0	0	0	0	0	0	0	0	0	0	0	0	0	0	0	0	0	0	0	0	0	0		0	0	0	0	0.0562	0	0	0	0	0	0	0	0	0	0	0	0	0	0
dme-mir-ITS1_6_36_+	6	36	......TTATTGAAGGAATTGATATATGCCAGTAAA.................................	30	TTATTGAAGGAATTGATATATGCCAGTAAA		0	0	0	0	0	0	0	0	0	0	0	0	0	0	0	0	0	0	0	0	0	0	0		0	0	0	0	0	0	0	0	0	0	0	0	0	0	0	0	0	0	0
dme-mir-ITS1_8_37_+	8	37	........ATTGAAGGAATTGATATATGCCAGTAAAA................................	29	ATTGAAGGAATTGATATATGCCAGTAAAA		0	0	0	0	0	0.1082	0	0	0	0	0	0	0	0	0	0	0	0	0	0	0	0	0		0	0	0	0	0	0	0	0	0	0	0	0	0	0	0	0	0	0	0
dme-mir-ITS1_10_40_+	10	40	..........TGAAGGAATTGATATATGCCAGTAAAATGG.............................	30	TGAAGGAATTGATATATGCCAGTAAAATGG		0	0	0	0	0	0	0	0	0	0	0	0	0	0	0	0	0	0	0	0	0	0	0		0	0	0	0	0	0	0	0	0	0	0	0	0	0	0	0	0	0	0
dme-mir-ITS1_10_39_+	10	39	..........TGAAGGAATTGATATATGCCAGTAAAATG..............................	29	TGAAGGAATTGATATATGCCAGTAAAATG		0	0	0	0	0	0	0	0	0	0	0	0	0	0	0	0	0	0	0.6444	0.8259	0	0	0		0	0	0	0	0	0	0	0	0	0	0	0	0	0	0	0	0	0	0
dme-mir-ITS1_11_40_+	11	40	...........GAAGGAATTGATATATGCCAGTAAAATGG.............................	29	GAAGGAATTGATATATGCCAGTAAAATGG		0	0	0	0	0	0	0	0	0	0	0	0	0	0	0	0	0	0	0	0	0	0	0		0	0	0	0	0	0	0	0	0	0	0	0	0	0	0	0	0	0	0
dme-mir-ITS1_11_38_+	11	38	...........GAAGGAATTGATATATGCCAGTAAAAT...............................	27	GAAGGAATTGATATATGCCAGTAAAAT		0	0	0	0	0	0	0	0	0	0	0	0	0	0	0	0	0	0	0	0	0	0	0		0	0	0	0	0	0	0	0	0	0	0	0	0	0	0	0	0	0	0
dme-mir-ITS1_14_33_+	14	33	..............GGAATTGATATATGCCAGT....................................	19	GGAATTGATATATGCCAGT		0	0	0	0	0	0	0	0	0	0	0	0	0	0	0	0	7.3331	0	0	0	0	0	0		0	0	0	0	0	0	0	2.2387	0	0	0	0	0	0	0	0	0	0	0
dme-mir-ITS1_15_41_+	15	41	...............GAATTGATATATGCCAGTAAAATGGT............................	26	GAATTGATATATGCCAGTAAAATGGT		0	0	0	0	0	0	0	0	0	0	0	0	0	0	10.3645	0	0	0	0	0	0	0	0		0	0	0	0	0	0	0	0	0	0	0	0	0	0	0	0	0	0	0
dme-mir-ITS1_15_40_+	15	40	...............GAATTGATATATGCCAGTAAAATGG.............................	25	GAATTGATATATGCCAGTAAAATGG		0	0	0	0	0	0	0	0	0	0	0	0	0	0	0	0	0	0	0	0	0	0	0		0	0	0	0	0	0	0	0	0	0	0	0	0	0	0	0	0	0	0
dme-mir-ITS1_15_34_+	15	34	...............GAATTGATATATGCCAGTA...................................	19	GAATTGATATATGCCAGTA		0	0	0	0	0	0	0	0	0	0	0	0	0	0	0	0	0	0	0	0	0	0	0		0	0	0	0	0	0	0	0	0	0	0	0	0	0	0	0	0	0	0
dme-mir-ITS1_16_43_+	16	43	................AATTGATATATGCCAGTAAAATGGTGT..........................	27	AATTGATATATGCCAGTAAAATGGTGT		0	0	0	0	0	0	0	0	0	0	0	0	0	0	0	0	0	0	0	0	0	0	0		0	0	0	0	0	0	0	0	0	0	0	0	0	0	0	0	0	0	0
dme-mir-ITS1_16_40_+	16	40	................AATTGATATATGCCAGTAAAATGG.............................	24	AATTGATATATGCCAGTAAAATGG		0	0	0	0	0.1663	0	0	0	0	0	0	0	0	0	0	0	0	0	0	0	0	0	0		0	0	0	0	0	0	0	0	0	0	0	0	0	0	0	0	0	0	0
dme-mir-ITS1_18_47_+	18	47	..................TTGATATATGCCAGTAAAATGGTGTATTT......................	29	TTGATATATGCCAGTAAAATGGTGTATTT		0	0	0	0	0	0	0	0	0	0	0	0	0	0	0	0	0	0	0	1.6518	0	0	0		0	0	0	0	0	0	0	0	0	0	0	0	0	0	0	0	0	0	0
dme-mir-ITS1_18_38_+	18	38	..................TTGATATATGCCAGTAAAAT...............................	20	TTGATATATGCCAGTAAAAT		0	0	0	0	0	0	0	0	0	0	0	0	0	0	0	0	0	0	0	0	0	0	0		0	0	0	0	0	0	0	0	0	0	0	0	0	0	0	0	0	0	0
dme-mir-ITS1_18_36_+	18	36	..................TTGATATATGCCAGTAAA.................................	18	TTGATATATGCCAGTAAA		0	0	0	0	0	0	0	0	0	0	0	0	0	0	0	0	0	0	0.6444	0	0	0	0		0	0	0	0	0	0	0	2.2387	0	0	0	0	0	0	0	0	0	0	0
dme-mir-ITS1_19_44_+	19	44	...................TGATATATGCCAGTAAAATGGTGTA.........................	25	TGATATATGCCAGTAAAATGGTGTA		0	0	0	0	0	0	0	0	0	0	0	0	0	0	0	0	0	0	0	0	0	0	0		0	0	0	0	0	0	0	0	0	0	0	0	0	0	0	0	0	0	0
dme-mir-ITS1_19_40_+	19	40	...................TGATATATGCCAGTAAAATGG.............................	21	TGATATATGCCAGTAAAATGG		0	0	0	0	0	0	0	0	0	0	0	0	0	0	0	0	0	0	0	0	0	0	0		0	0	0	0.0654	0	0	0	0	0	0	0	0	0	0	0	0	0	0	0
dme-mir-ITS1_20_45_+	20	45	....................GATATATGCCAGTAAAATGGTGTAT........................	25	GATATATGCCAGTAAAATGGTGTAT		0	0	0	0	0	0	0	0	0	0	0	0	0	0	0	0	0	0	0	0	0	0	0		0	0	0	0	0	0	0	0	0	0	0	0	0	0	0	0	0	0	0
dme-mir-ITS1_20_43_+	20	43	....................GATATATGCCAGTAAAATGGTGT..........................	23	GATATATGCCAGTAAAATGGTGT		0	0	0	0	0	0.1082	0	0	0	0	0	0	0	0	0	0	0	0	0	0	0	0	0		0	0	0	0	0	0	0	0	0	0	0	0	0	0	0	0	0	0	0
dme-mir-ITS1_21_45_+	21	45	.....................ATATATGCCAGTAAAATGGTGTAT........................	24	ATATATGCCAGTAAAATGGTGTAT		0	0	0	0	0	0	0	0	0	0	0	0	0	0	0	0	0	0	0.6444	0	0	0	0		0	0	0	0.0327	0	0	0	0	0	0	0	0	0	0	0	0	0	0	0
dme-mir-ITS1_22_49_+	22	49	......................TATATGCCAGTAAAATGGTGTATTTTT....................	27	TATATGCCAGTAAAATGGTGTATTTTT		0	0	0	0	0	0	0	0	0	0	0	0	0	0	0	0	0	0	0	0	0	0	0		0	0	0	0	0	0	0	0	0	0	0	0	0	0	0	0	0	0	0
dme-mir-ITS1_22_45_+	22	45	......................TATATGCCAGTAAAATGGTGTAT........................	23	TATATGCCAGTAAAATGGTGTAT		0	0	0	0	0	0	0	0	0	0	0	0	0	0	0	0	0	0	0	0	0	0	0		0	0	0	0	0	0	0	2.2387	0	0	0	0	0	0	0	0	0	0	0
dme-mir-ITS1_22_40_+	22	40	......................TATATGCCAGTAAAATGG.............................	18	TATATGCCAGTAAAATGG		0	0	0	0	0	0	0	0	0	0	0	0	0	0	0	0	0	0	0	0	0	0	0		0	0	0	0	0	0	0	0	0	0	0	0	0	0	0	0	0	0	0
dme-mir-ITS1_23_49_+	23	49	.......................ATATGCCAGTAAAATGGTGTATTTTT....................	26	ATATGCCAGTAAAATGGTGTATTTTT		0	0	0	0	0	0	0	0	0	0	0	0	0	0	0	0	0	0	0	0	0	0	0		0	0	0	0	0	0	0	0	1.3386	0	0	0	0	0	0	0	0	0	0
dme-mir-ITS1_23_46_+	23	46	.......................ATATGCCAGTAAAATGGTGTATT.......................	23	ATATGCCAGTAAAATGGTGTATT		0	0	0	0	0	0	0	0	0	0	0	0	0	0	0	0	0	0	0	0	0	0	0		0	0	0	0	0	0	0	2.2387	0	0	0	0	0	0	0	0	0	0	0
dme-mir-ITS1_24_49_+	24	49	........................TATGCCAGTAAAATGGTGTATTTTT....................	25	TATGCCAGTAAAATGGTGTATTTTT		0	0	0	0	0	0	0	0	2.6734	0	0	0	0	0	0	0	0	0	0	0	0	0	0		0	0	0	0	0	0	0	0	0	0	0	0	0	0	0	0	0	0	0
dme-mir-ITS1_26_53_+	26	53	..........................TGCCAGTAAAATGGTGTATTTTTAATT................	27	TGCCAGTAAAATGGTGTATTTTTAATT		0	0	0	0	0	0	0	0	0	0	0	0	0	0	0	0	0	0	0	0	0	0	0		0	0	0	0	0	0	0	0	0	0	0	0	0	0	0	0	0	0	0
dme-mir-ITS1_27_46_+	27	46	...........................GCCAGTAAAATGGTGTATT.......................	19	GCCAGTAAAATGGTGTATT		0	0	0	0	0	0	0	0	0	0	0	0	0	0	0	0	0	0	0	0	0	0	0		0	0	0	0	0	0	0	2.2387	0.6693	0	0	0	0	0	0	0	0	0	0
dme-mir-ITS1_28_53_+	28	53	............................CCAGTAAAATGGTGTATTTTTAATT................	25	CCAGTAAAATGGTGTATTTTTAATT		0	0	0	0	0	0	0	0	0	0	0	0	0	0	0	0	0	0	0	0	0	0	0		0	0	0	0	0	0	0	0	0	0	0	0	0	0	0	0	0	0	0
dme-mir-ITS1_31_49_+	31	49	...............................GTAAAATGGTGTATTTTT....................	18	GTAAAATGGTGTATTTTT		0	0	0	0	0	0	0	0	0	0	0	4.2115	0	0	0	0	0	0	0	0	0	0	0		0	0	0	0	0.0281	0	0	0	0	0	0	0	0	0	0	0	0	0	0
dme-mir-ITS1_32_53_+	32	53	................................TAAAATGGTGTATTTTTAATT................	21	TAAAATGGTGTATTTTTAATT		0	0	0	0	0	0	0	0	0	0	0	0	0	0	0	0	0	0	0	0	0	0	0		0	0	0	0	0	0	0	2.2387	0	0	0	0	0	0	0	0	0	0	0
dme-mir-ITS1_32_52_+	32	52	................................TAAAATGGTGTATTTTTAAT.................	20	TAAAATGGTGTATTTTTAAT		0	0	0	0	0	0	0	0	0	0	0	4.2115	0	0	0	0	0	0	0	0	0	0	0		0	0	0	0	0.0281	0	0	0	0	0	0	0	0	0	0	0	0	0	0
dme-mir-ITS1_33_56_+	33	56	.................................AAAATGGTGTATTTTTAATTTCT.............	23	AAAATGGTGTATTTTTAATTTCT		0	0	0	0	0	0	0	0	0	0	0	0	0	0	0	0	0	0	0	0	0	0	0		0	0	0	0	0	0	0	0	0	0	0	0	0	0	0	0	0	0	0
dme-mir-ITS1_33_52_+	33	52	.................................AAAATGGTGTATTTTTAAT.................	19	AAAATGGTGTATTTTTAAT		0.0465	0	0	0	0	0	0	0	0	0	0	0	0	0	0	0	0	0	0	0	0	0	0		0	0	0	0	0	0	0	0	0	0	0	0	0	0	0	0	0	0	0
dme-mir-ITS1_35_59_+	35	59	...................................AATGGTGTATTTTTAATTTCTTTC..........	24	AATGGTGTATTTTTAATTTCTTTC		0	0	0	0	0	0	0	0	0	0	0	0	0	0	0	0	0	0	0	0	0	0	0		0	0	0	0	0	0	0	0	0	0	0	0	0	0	0	0	0	0	0
dme-mir-ITS1_35_56_+	35	56	...................................AATGGTGTATTTTTAATTTCT.............	21	AATGGTGTATTTTTAATTTCT		0	0	0	0	0	0	0	0	0	0	0	0	0	0	0	0	0	0	0	0	0	0	0		0	0	0	0	0	0	0	0	0	0	0	0	0	0	0	0	0	0	0
dme-mir-ITS1_36_64_+	36	64	....................................ATGGTGTATTTTTAATTTCTTTCAATAA.....	28	ATGGTGTATTTTTAATTTCTTTCAATAA		0	0	0	0	0	0	0	0	0	0	0	0	0	0	0	0	0	0	0	0	0	1.0137	0		0	0	0	0	0	0	0	0	0	0	0	0	0	0	0	0	0	0	0
dme-mir-ITS1_36_59_+	36	59	....................................ATGGTGTATTTTTAATTTCTTTC..........	23	ATGGTGTATTTTTAATTTCTTTC		0	0	0	0	0	0	0	0	0	0	0	0	0	9.5624	0	0	0	0	0	0	0	0	0		0	0	0	0	0	0	0	0	0	0	0	0	0	0	0	0	0	0	0
dme-mir-ITS1_36_57_+	36	57	....................................ATGGTGTATTTTTAATTTCTT............	21	ATGGTGTATTTTTAATTTCTT		0	0	0	0	0	0	0	0	0	0	0	0	0	0	0	0	0	0	0	0	0	0	0		0	0	0	0	0.0281	0	0	0	0	0	0	0	0	0	0	0	0	0	0
dme-mir-ITS1_36_55_+	36	55	....................................ATGGTGTATTTTTAATTTC..............	19	ATGGTGTATTTTTAATTTC		0	0	0	0	0	0	0	0	0	0	0	4.2115	0	0	0	0	0	0	0	0	0	0	0		0	0	0	0	0	0	0	0	0	0	0	0	0	0	0	0	0	0	0
dme-mir-ITS1_39_61_+	39	61	.......................................GTGTATTTTTAATTTCTTTCAA........	22	GTGTATTTTTAATTTCTTTCAA		0.0931	0	0	0	0	0	0	0	0	0	0	0	0	0	0	0	0	0	0	0	0	0	0		0	0	0	0	0	0	0	0	0	0	0	0	0	0	0	0	0	0	0
dme-mir-ITS1_39_59_+	39	59	.......................................GTGTATTTTTAATTTCTTTC..........	20	GTGTATTTTTAATTTCTTTC		0	0	0	0	0	0	0	0	0	0	0	0	0	0	0	0	0	0	0.6444	0	0	1.0137	0		0	0	0	0	0	0	0	0	0	0	0	0	0	0	0	0	0	0	0
dme-mir-ITS1_42_60_+	42	60	..........................................TATTTTTAATTTCTTTCA.........	18	TATTTTTAATTTCTTTCA		0	0	0	0	0	0	0	0	0	0	0	0	0	0	0	0	0	0	0	0	0	0	0		0	0	0	0.0327	0.0281	0	0	0	0	0	0	0	0	0	0	0	0	0	0
dme-mir-ITS1_44_65_+	44	65	............................................TTTTTAATTTCTTTCAATAAA....	21	TTTTTAATTTCTTTCAATAAA		0	0	0	0	0	0	0	0	0	0	0	0	0	0	0	0	0	0	0	0	0	0	0		0	0	0	0.0654	0	0	0	0	0	0	0	0	0	0	0	0	0	0	0
dme-mir-ITS1_44_64_+	44	64	............................................TTTTTAATTTCTTTCAATAA.....	20	TTTTTAATTTCTTTCAATAA		0	0	0	0	0	0	0	0	0	0	0	0	0	0	0	0	0	0	0	0	0	0	0		0	0	0	0.0654	0	0	0	0	0	0	0	0	0	0	0	0	0	0	0
dme-mir-ITS1_46_67_+	46	67	..............................................TTTAATTTCTTTCAATAAAAA..	21	TTTAATTTCTTTCAATAAAAA		0.0465	0	0	0	0	0	0	0	0	0	0	0	0	0	0	0	0	0	0.6444	0	0	0	0		0	0	0	0	0	0	0	0	0	0	0	0	0	0	0	0	0	0	0
dme-mir-ITS1_46_66_+	46	66	..............................................TTTAATTTCTTTCAATAAAA...	20	TTTAATTTCTTTCAATAAAA		0	0	0	0	0	0	0	0	0	0	0	0	0	0	0	0	0	0	0	0	0	0	0		0	0	0	0	0	0	0	0	0	0	0	0	0	0	0	0	0	0	0
dme-mir-ITS1_0_27_+	0	27	ATACATTTATTGAAGGAATTGATATAT..........................................	27	ATACATTTATTGAAGGAATTGATATAT		0	0	0	0	0.0831	0	0	0	0	0	0	0	0	0	0	0	0	0	0	0	0	0	0		0	0	0	0	0	0	0	0	0	0	0	0	0	0	0	0	0	0	0
dme-mir-ITS1_1_19_+	1	19	.TACATTTATTGAAGGAAT..................................................	18	TACATTTATTGAAGGAAT		0	0	0	0	0	0	0	0	0	0	0	0	0	0	0	0	0	0	0	0	0	0	0		0	0	0	0	0	0	0	0	0	0	0	0	0	0	0	0	0	0	0
dme-mir-ITS1_8_36_+	8	36	........ATTGAAGGAATTGATATATGCCAGTAAA.................................	28	ATTGAAGGAATTGATATATGCCAGTAAA		0	0	0	0	0	0	0	0	0	0	0	0	0	0	0	0	0	0	0	0	0	0	0		0	0	0	0	0	0	0	0	0	0	0	0	0	0	0	0	0	0	0
dme-mir-ITS1_11_41_+	11	41	...........GAAGGAATTGATATATGCCAGTAAAATGGT............................	30	GAAGGAATTGATATATGCCAGTAAAATGGT		0	0	0	0	0	0	0	0	0	0	0	0	0	0	0	0	0	0	0	0	0	0	0		0	0	0	0	0	0	0	0	0	0	0	0	0	0	0	0	0	0	0
dme-mir-ITS1_12_34_+	12	34	............AAGGAATTGATATATGCCAGTA...................................	22	AAGGAATTGATATATGCCAGTA		0	0	0	0	0	0	0	0	0	0	0	0	0	0	0	0	0	0	0	0	0	0	0		0	0	0	0	0	0	0	0	0	0	0	0	0	0	0	0	0	0	0
dme-mir-ITS1_13_34_+	13	34	.............AGGAATTGATATATGCCAGTA...................................	21	AGGAATTGATATATGCCAGTA		0	0	0	0	0	0	0	0	0	0	0	0	0	0	0	0	0	0	0	0	0	0	0		0	0	0	0	0	0	0	2.2387	0	0	0	0	0	0	0	0	0	0	0
dme-mir-ITS1_14_37_+	14	37	..............GGAATTGATATATGCCAGTAAAA................................	23	GGAATTGATATATGCCAGTAAAA		0	0	0	0	0	0	0	0	0	0	0	0	0	0	0	0	0	0	0	0	0	0	0		0	0	0	0	0	0	0	0	0	0	0	0	0	0	0	0	0	0	0
dme-mir-ITS1_14_36_+	14	36	..............GGAATTGATATATGCCAGTAAA.................................	22	GGAATTGATATATGCCAGTAAA		0	0	0	0	0	0	0	0	0	0	0	0	0	0	0	0	0	0	0	0	0	0	0		0	0	0	0	0	0	0	0	0	0	0	0	0	0	0	0	0	0	0
dme-mir-ITS1_14_32_+	14	32	..............GGAATTGATATATGCCAG.....................................	18	GGAATTGATATATGCCAG		0	0	0	0	0	0	0	0	0	0	0	0	0	0	0	0	0	0	0	0	0	0	0		0	0	0	0	0	0	0	0	0.6693	0	0	0	0	0	0	0	0	0	0
dme-mir-ITS1_15_37_+	15	37	...............GAATTGATATATGCCAGTAAAA................................	22	GAATTGATATATGCCAGTAAAA		0	0	0	0	0	0	0	0	0	0	0	0	0	0	0	0	0	5.8276	0	0	0	0	0		0	0	0	0	0	0	0	0	0	0	0	0	0	0	0	0	0	0	0
dme-mir-ITS1_15_36_+	15	36	...............GAATTGATATATGCCAGTAAA.................................	21	GAATTGATATATGCCAGTAAA		0	0	0	0	0	0	0	0	0	0	0	0	0	0	0	0	0	0	0	0	0	0	0		0	0	0	0	0	0	0	0	0.6693	0	0	0	0	0	0	0	0	0	0
dme-mir-ITS1_15_33_+	15	33	...............GAATTGATATATGCCAGT....................................	18	GAATTGATATATGCCAGT		0	0	0	0	0	0	0	0	0	0	0	0	0	0	0	0	0	0	0	0	0	0	0		0	0	0	0	0	0	0	0	0	0	0	0	0	0	0	0	0	0	0
dme-mir-ITS1_16_42_+	16	42	................AATTGATATATGCCAGTAAAATGGTG...........................	26	AATTGATATATGCCAGTAAAATGGTG		0	0	0	0	0	0	0	0	0	0	0	0	0	0	0	0	0	0	0	0	0	0	0		0	0	0	0	0	0	0	0	0	0	0	0	0	0	0	0	0	0	0
dme-mir-ITS1_16_37_+	16	37	................AATTGATATATGCCAGTAAAA................................	21	AATTGATATATGCCAGTAAAA		0	0	0	0	0	0	0	0	0	0	0	0	0	0	0	0	0	0	0	0	0	0	0		0	0	0	0	0	0	0	2.2387	0	0	0	0	0	0	0	0	0	0	0
dme-mir-ITS1_17_44_+	17	44	.................ATTGATATATGCCAGTAAAATGGTGTA.........................	27	ATTGATATATGCCAGTAAAATGGTGTA		0	0	0	0	0	0	0	0	0	0	0	0	0	0	0	0	0	0	0	0	0	0	0		0	0	0	0	0	0	0	0	0	0	0	0	0	0	0	0	0	0	0
dme-mir-ITS1_17_42_+	17	42	.................ATTGATATATGCCAGTAAAATGGTG...........................	25	ATTGATATATGCCAGTAAAATGGTG		0	0	0	0	0.0831	0	0	0	0	0	0	0	0	0	0	0	0	0	0	0	0	0	0		0	0	0	0	0	0	0	0	0	0	0	0	0	0	0	0	0	0	0
dme-mir-ITS1_17_41_+	17	41	.................ATTGATATATGCCAGTAAAATGGT............................	24	ATTGATATATGCCAGTAAAATGGT		0	0	0	0	0	0	0	0	0	1.1572	0	0	0	0	0	0	0	0	0	0	0	0	0		0	0	0	0	0	0	0	0	0	0	0	0	0	0	0	0	0	0	0
dme-mir-ITS1_18_46_+	18	46	..................TTGATATATGCCAGTAAAATGGTGTATT.......................	28	TTGATATATGCCAGTAAAATGGTGTATT		0	0	0	0	0	0.1082	0	0	0	0	0	0	0	0	0	0	0	0	0	0	0	0	0		0	0	0	0	0	0	0	0	0	0	0	0	0	0	0	0	0	0	0
dme-mir-ITS1_18_45_+	18	45	..................TTGATATATGCCAGTAAAATGGTGTAT........................	27	TTGATATATGCCAGTAAAATGGTGTAT		0	0	0	0	0	0	0	0	0	0	0	0	0	0	0	0	0	0	0	0	0	0	0		0	0	0	0	0.0281	0	0	0	0	0	0	0	0	0	0	0	0	0	0
dme-mir-ITS1_18_42_+	18	42	..................TTGATATATGCCAGTAAAATGGTG...........................	24	TTGATATATGCCAGTAAAATGGTG		0	0	0	0	0	0	0	0	0	0	0	0	0	0	0	0	0	0	0	0	0	1.0137	0		0	0	0	0	0	0	0	0	0	0	0	0	0	0	0	0	0	0	0
dme-mir-ITS1_18_41_+	18	41	..................TTGATATATGCCAGTAAAATGGT............................	23	TTGATATATGCCAGTAAAATGGT		0	0	0	0	0	0	0	0	0	0	0	0	0	0	0	0	0	0	0	0	0	0	0		0	0	0	0	0	0	0	0	0	0	0	0	0	0	0	0	0	0	0
dme-mir-ITS1_19_49_+	19	49	...................TGATATATGCCAGTAAAATGGTGTATTTTT....................	30	TGATATATGCCAGTAAAATGGTGTATTTTT		0	0	0	0	0	0	0	0	0	0	0	0	0	0	0	0	0	0	0	0	0	0	0		0	0	0	0	0	0	0	0	0	0	0	0	0	0	0	0	0	0	0
dme-mir-ITS1_19_48_+	19	48	...................TGATATATGCCAGTAAAATGGTGTATTTT.....................	29	TGATATATGCCAGTAAAATGGTGTATTTT		0	0	0	0	0	0	0	0	0	0	0	0	0	0	0	0	0	0	0	0	0	0	0		0	0	0	0	0.0281	0	0	0	0	0	0	0	0	0	0	0	0	0	0
dme-mir-ITS1_19_43_+	19	43	...................TGATATATGCCAGTAAAATGGTGT..........................	24	TGATATATGCCAGTAAAATGGTGT		0	0	0	0	0	0	0	0	0	0	0	0	0	0	0	0	0	0	0	0	0	0	0		0	0	0	0	0	0	0	0	0	0	0	0	0	0	0	0	0	0	0
dme-mir-ITS1_19_41_+	19	41	...................TGATATATGCCAGTAAAATGGT............................	22	TGATATATGCCAGTAAAATGGT		0	0	0	0	0	0	0	0	0	0	0	0	0	0	0	0	0	0	0	0	0	0	0		0	0	0	0	0	0	0	0	0	0	0	0	0	0	0	0	0	0	0
dme-mir-ITS1_21_43_+	21	43	.....................ATATATGCCAGTAAAATGGTGT..........................	22	ATATATGCCAGTAAAATGGTGT		0	0	0	0	0	0	0	0	0	0	0	0	0	0	0	0	0	0	0	0	0	0	0		0	0	0	0	0	0	0	0	0	0	0	0	0	0	0	0	0	0	0
dme-mir-ITS1_21_40_+	21	40	.....................ATATATGCCAGTAAAATGG.............................	19	ATATATGCCAGTAAAATGG		0	0	0	0	0	0	0	0	0	0	0	0	0	0	0	0	0	0	0	0	0	0	0		0	0	0.1805	0	0	0	0	0	0	0	0	0	0	0	0	0	0	0	0
dme-mir-ITS1_22_48_+	22	48	......................TATATGCCAGTAAAATGGTGTATTTT.....................	26	TATATGCCAGTAAAATGGTGTATTTT		0	0	0	0	0	0	0	0	0	0	0	0	0	0	0	0	0	0	0	0	0	0	0		0	0	0	0	0	0	0	0	0	0	0	0	0	0	0	0	0	0	0
dme-mir-ITS1_22_47_+	22	47	......................TATATGCCAGTAAAATGGTGTATTT......................	25	TATATGCCAGTAAAATGGTGTATTT		0	0	0	0	0	0	0	0	0	0	0	0	0	0	0	0	0	0	0	0	0	0	0		0	0	0	0	0	0	0	2.2387	0	0	0	0	0	0	0	0	0	0	0
dme-mir-ITS1_22_41_+	22	41	......................TATATGCCAGTAAAATGGT............................	19	TATATGCCAGTAAAATGGT		0	0	0	0	0	0	0	0	0	0	0	0	0	0	0	0	0	0	0	0	0.2511	0	0		0	0	0	0	0	0	0	0	0	0	0	0	0	0	0	0	0	0	0
dme-mir-ITS1_23_45_+	23	45	.......................ATATGCCAGTAAAATGGTGTAT........................	22	ATATGCCAGTAAAATGGTGTAT		0	0	0	0	0	0	0	0	0	0	1.1502	0	0	0	0	0	0	0	0	0	0	0	0		0	0	0	0	0	0	0	0	0	0	0	0	0	0	0	0	0	0	0
dme-mir-ITS1_24_53_+	24	53	........................TATGCCAGTAAAATGGTGTATTTTTAATT................	29	TATGCCAGTAAAATGGTGTATTTTTAATT		0	0	0	0	0	0	0	0	0	0	0	0	0	0	0	0	0	0	0	0	0	0	0		0	0	0	0	0	0	0	0	0	0	0	0	0	0	0	0	0	0	0
dme-mir-ITS1_24_52_+	24	52	........................TATGCCAGTAAAATGGTGTATTTTTAAT.................	28	TATGCCAGTAAAATGGTGTATTTTTAAT		0	0	0	0	0	0	0	0	0	0	0	0	0	0	0	0	0	0	0	0	0	0	0		0	0	0	0	0	0	0	0	0	0	0	0	0	0	0	0	0	0	0
dme-mir-ITS1_25_48_+	25	48	.........................ATGCCAGTAAAATGGTGTATTTT.....................	23	ATGCCAGTAAAATGGTGTATTTT		0	0	0	0	0	0	0	0	0	0	0	0	0	0	0	0	0	0	0	0	0	0	0		0	0	0	0	0	0	0	0	0	0	0	0	0	0	0	0	0	0	0
dme-mir-ITS1_25_46_+	25	46	.........................ATGCCAGTAAAATGGTGTATT.......................	21	ATGCCAGTAAAATGGTGTATT		0	0	0	0	0	0	0	0	0	0	0	0	0	0	0	0	0	0	0	0	0	0	0		0	0	0	0	0	0	0	2.2387	0	0	0	0	0	0	0	0	0	0	0
dme-mir-ITS1_26_49_+	26	49	..........................TGCCAGTAAAATGGTGTATTTTT....................	23	TGCCAGTAAAATGGTGTATTTTT		0	0	0	0	0	0	0	0	0	0	0	0	0	0	0	0	0	0	0	0	0	0	0		0	0	0	0	0	0	0	0	0	0	0	0	0	0	0	0	0	0	0
dme-mir-ITS1_27_52_+	27	52	...........................GCCAGTAAAATGGTGTATTTTTAAT.................	25	GCCAGTAAAATGGTGTATTTTTAAT		0	0	0	0	0	0	0	0	0	0	0	4.2115	0	0	0	0	0	0	0	0	0	0	0		0	0	0	0	0	0	0	0	0	0	0	0	0	0	0	0	0	0	0
dme-mir-ITS1_27_51_+	27	51	...........................GCCAGTAAAATGGTGTATTTTTAA..................	24	GCCAGTAAAATGGTGTATTTTTAA		0	0	0	0	0	0	0	0	0	0	0	0	0	0	0	0	7.3331	0	0	0	0	0	0		0	0	0	0	0	0	0	0	0	0	0	0	0	0	0	0	0	0	0
dme-mir-ITS1_28_57_+	28	57	............................CCAGTAAAATGGTGTATTTTTAATTTCTT............	29	CCAGTAAAATGGTGTATTTTTAATTTCTT		0	0	0	0	0	0	0	0	0	0	0	0	0	0	0	0	0	0	0	0	0	0	0		0	0	0	0	0	0	0	0	0	0	0	0	0	0	0	0	0	0	0
dme-mir-ITS1_28_49_+	28	49	............................CCAGTAAAATGGTGTATTTTT....................	21	CCAGTAAAATGGTGTATTTTT		0	0	0	0	0	0	0	0	0	0	0	0	0	0	0	0	0	0	0	0	0	0	0		0	0	0	0	0.0281	0	0	0	0	0	0	0	0	0	0	0	0	0	0
dme-mir-ITS1_29_57_+	29	57	.............................CAGTAAAATGGTGTATTTTTAATTTCTT............	28	CAGTAAAATGGTGTATTTTTAATTTCTT		0	0	0	0	0	0	0	0	0	0	0	0	0	0	0	0	0	0	0	0	0	1.0137	0		0	0	0	0	0	0	0	0	0	0	0	0	0	0	0	0	0	0	0
dme-mir-ITS1_29_54_+	29	54	.............................CAGTAAAATGGTGTATTTTTAATTT...............	25	CAGTAAAATGGTGTATTTTTAATTT		0	0	0	0	0	0	0	0	0	0	0	0	0	0	0	0	0	0	0	0	0	0	0		0	0	0	0	0	0	0	0	0	0	0	0	0	0	0	0	0	0	0
dme-mir-ITS1_29_48_+	29	48	.............................CAGTAAAATGGTGTATTTT.....................	19	CAGTAAAATGGTGTATTTT		0	0	0	0	0	0	0	0	0	0	0	0	0	0	0	0	0	0	0	0	0	0	0		0	0	0	0	0	0	0	0	0	0	0	0	0	0	0	0	0	0	0
dme-mir-ITS1_30_56_+	30	56	..............................AGTAAAATGGTGTATTTTTAATTTCT.............	26	AGTAAAATGGTGTATTTTTAATTTCT		0	0	0	0	0	0	0	0	0	0	0	0	0	0	0	0	0	0	0	0	0	0	0		0	0	0	0	0	0	0	0	0	0	0	0	0	0	0	0	0	0	0
dme-mir-ITS1_31_57_+	31	57	...............................GTAAAATGGTGTATTTTTAATTTCTT............	26	GTAAAATGGTGTATTTTTAATTTCTT		0	0	0	0	0	0	0	0	0	0	0	0	0	0	0	0	0	0	0	0	0	0	0		0	0	0	0	0	0	0	0	0	0	0	0	0	0	0	0	0	0	0
dme-mir-ITS1_31_50_+	31	50	...............................GTAAAATGGTGTATTTTTA...................	19	GTAAAATGGTGTATTTTTA		0	0	0	0	0	0	0	0	0	0	0	0	0	0	0	0	0	0	0	0	0	0	0		0.406	0	0	0	0	0	0	0	0	0	0	0	0	0	0	0	0	0	0
dme-mir-ITS1_33_54_+	33	54	.................................AAAATGGTGTATTTTTAATTT...............	21	AAAATGGTGTATTTTTAATTT		0	0	0	0	0	0	0	0	0	0	0	0	0	0	0	0	0	0	0	0	0	0	0		0	0	0	0	0	0	0	0	0	0	0	0	0	0	0	0	0	0	0
dme-mir-ITS1_33_53_+	33	53	.................................AAAATGGTGTATTTTTAATT................	20	AAAATGGTGTATTTTTAATT		0	0	0	0	0	0	0	0	0	0	0	0	0	0	0	0	0	0	0	0	0	0	0		0	0	0	0	0	0	0	0	0	0	0	0	0	0	0	0	0	0	0
dme-mir-ITS1_34_55_+	34	55	..................................AAATGGTGTATTTTTAATTTC..............	21	AAATGGTGTATTTTTAATTTC		0	0	0	0	0	0	0	0	0	0	0	0	0	0	0	0	0	0	0	0	0	0	0		0	0	0	0	0	0	0	0	0	0	0	0	0	0	0	0	0	0	0
dme-mir-ITS1_34_53_+	34	53	..................................AAATGGTGTATTTTTAATT................	19	AAATGGTGTATTTTTAATT		0	0	0	0	0	0	0	0	0	0	0	0	0	0	0	0	0	0	0	0	0	0	0		0	0	0	0	0	0	0	0	0	0	0	0	0	0	0	0	0	0	0
dme-mir-ITS1_34_52_+	34	52	..................................AAATGGTGTATTTTTAAT.................	18	AAATGGTGTATTTTTAAT		0	0	0	0	0	0	0	0	0	0	0	0	0	0	0	0	0	0	0	0	0	0	0		0	0	0	0	0.0281	0	0	0	0	0	0	0	0	0	0	0	0	0	0
dme-mir-ITS1_35_65_+	35	65	...................................AATGGTGTATTTTTAATTTCTTTCAATAAA....	30	AATGGTGTATTTTTAATTTCTTTCAATAAA		0	0	0	0	0	0	0	0	0	0	0	0	0	0	0	0	0	0	0	0	0	0	0		0	0	0	0	0	0	0	0	0	0	0	0	0	0	0	0	0	0	0
dme-mir-ITS1_35_57_+	35	57	...................................AATGGTGTATTTTTAATTTCTT............	22	AATGGTGTATTTTTAATTTCTT		0	0	0	0	0	0	0	0	0	0	0	0	0	0	0	0	0	0	0	0	0	0	0		0	0	0	0	0	0	0	0	0	0	0	0	0	0	0	0	0	0	0
dme-mir-ITS1_36_60_+	36	60	....................................ATGGTGTATTTTTAATTTCTTTCA.........	24	ATGGTGTATTTTTAATTTCTTTCA		0	0	0	0	0	0	0	0	0	0	0	0	0	0	10.3645	0	0	0	0	0	0	0	0		0	0	0	0	0	0	0	0	0	0	0	0	0	0	0	0	0	0	0
dme-mir-ITS1_37_66_+	37	66	.....................................TGGTGTATTTTTAATTTCTTTCAATAAAA...	29	TGGTGTATTTTTAATTTCTTTCAATAAAA		0	0	0	0	0	0	0	0	0	0	0	0	0	0	0	0	0	0	0	0	0	0	0		0	0	0	0	0	0	0	0	0	0	0	0	0	0	0	0	0	0	0
dme-mir-ITS1_37_55_+	37	55	.....................................TGGTGTATTTTTAATTTC..............	18	TGGTGTATTTTTAATTTC		0	0	0	0	0	0	0	0	0	0	0	0	0	0	0	0	0	0	0	0	0	0	0		0	0	0	0	0	0	0	0	0	0	0	0	0	0	0	0	0	0	0
dme-mir-ITS1_38_67_+	38	67	......................................GGTGTATTTTTAATTTCTTTCAATAAAAA..	29	GGTGTATTTTTAATTTCTTTCAATAAAAA		0	0	0	0	0	0	0	0	0	0	0	0	0	0	0	0	0	0	0	0	0	0	0		0	0	0	0	0	0	0	0	0	0	0	0	0	0	0	0	0	0	0
dme-mir-ITS1_39_67_+	39	67	.......................................GTGTATTTTTAATTTCTTTCAATAAAAA..	28	GTGTATTTTTAATTTCTTTCAATAAAAA		0	0	0	0	0	0	0	0	0	0	0	0	0	0	0	0	0	0	0	0.8259	0	0	0		0	0	0	0	0	0	0	0	0	0	0	0	0	0	0	0	0	0	0
dme-mir-ITS1_40_68_+	40	68	........................................TGTATTTTTAATTTCTTTCAATAAAAAC.	28	TGTATTTTTAATTTCTTTCAATAAAAAC		0	0	0	0	0	0	0	0	0	0	0	0	0	0	0	0	0	0	0	0	0	0	0		0	0	0	0	0	0	0	0	0	0	0	0	0	0	0	0	0	0	0
dme-mir-ITS1_42_69_+	42	69	..........................................TATTTTTAATTTCTTTCAATAAAAACA	27	TATTTTTAATTTCTTTCAATAAAAACA		0	0	0	0	0	0	0	0	0	0	0	0	0	0	0	0	0	0	0	0	0	0	0		0	0	0	0	0	0	0	0	0	0	0	0	0	0	0	0	0	0	0
dme-mir-ITS1_42_68_+	42	68	..........................................TATTTTTAATTTCTTTCAATAAAAAC.	26	TATTTTTAATTTCTTTCAATAAAAAC		0	0	0	0	0	0	0	0	0	0	0	0	0	0	0	0	0	0	0	0	0	0	0		0	0	0	0	0	0	0	0	0	0	0	0	0	0	0	0	0	0	0
dme-mir-ITS1_44_68_+	44	68	............................................TTTTTAATTTCTTTCAATAAAAAC.	24	TTTTTAATTTCTTTCAATAAAAAC		0	0	0	0	0	0	0	0	0	0	0	0	0	0	0	0	0	0	0	0	0	0	0		0	0	0	0	0	0	0	0	0	0	0	0	0	0	0	0	0	0	0
dme-mir-ITS1_44_62_+	44	62	............................................TTTTTAATTTCTTTCAAT.......	18	TTTTTAATTTCTTTCAAT		0	0	0	0	0	0	0	0	0	0	0	0	0	0	0	0	0	0	0	0	0	0	0		0	0	0	0	0	0	0	0	0	0	0	0	0	0	0	0	0	0	0
dme-mir-ITS1_45_64_+	45	64	.............................................TTTTAATTTCTTTCAATAA.....	19	TTTTAATTTCTTTCAATAA		0	0	0	0	0	0	0	0	0	0	0	0	0	0	0	0	0	0	0	0	0	0	0		0	0	0	0	0	0	0	0	0	0	0	0	0	0	0	0	0	0	0
dme-mir-ITS1_48_68_+	48	68	................................................TAATTTCTTTCAATAAAAAC.	20	TAATTTCTTTCAATAAAAAC		0	0	0	0	0	0	0	0	0	0	0	0	0	0	0	0	0	0	0	0	0	0	0		0	0	0	0	0	0	0	0	0	0	0	0	0	0	0	0	0	0	0
dme-mir-ITS1_0_29_+	0	29	ATACATTTATTGAAGGAATTGATATATGC........................................	29	ATACATTTATTGAAGGAATTGATATATGC		0	0	0	0	0	0	0	0	0	0	0	0	0	0	0	0	0	0	0	0	0	0	0		0	0	0	0	0	0	0	0	0	0	0	0	0	0	0	0	0	0	0
dme-mir-ITS1_0_28_+	0	28	ATACATTTATTGAAGGAATTGATATATG.........................................	28	ATACATTTATTGAAGGAATTGATATATG		0	0	0	0	0	0	0	0	0	0	0	0	0	0	0	0	0	0	0	0	0	0	0		0	0	0	0	0	0	0	0	0	0	0	0	0	0	0	0	0	0	0
dme-mir-ITS1_0_18_+	0	18	ATACATTTATTGAAGGAA...................................................	18	ATACATTTATTGAAGGAA		0	0	0	0	0	0	0	0	0	0	0	0	0	0	0	0	0	0	0	0	0	0	0		0	0	0	0	0	0	0	0	0	0	0	0	0	0	0	0	0	0	0
dme-mir-ITS1_13_41_+	13	41	.............AGGAATTGATATATGCCAGTAAAATGGT............................	28	AGGAATTGATATATGCCAGTAAAATGGT		0	0	0	0	0	0	0	0	0	0	0	0	0	0	0	0	0	0	0	0	0	0	0		0	0	0	0	0	0	0	0	0	0	0	0	0	0	0	0	0	0	0
dme-mir-ITS1_13_40_+	13	40	.............AGGAATTGATATATGCCAGTAAAATGG.............................	27	AGGAATTGATATATGCCAGTAAAATGG		0	0	0	0	0	0	0	0	0	0	0	0	0	0	0	0	0	0	0	0	0	0	0		0	0	0	0	0	0	0	0	0	0	0	0	0	0	0	0	0	0	0
dme-mir-ITS1_13_38_+	13	38	.............AGGAATTGATATATGCCAGTAAAAT...............................	25	AGGAATTGATATATGCCAGTAAAAT		0	0	0	0	0	0	0	0	0	0	0	0	0	0	0	0	0	0	0	0	0	0	0		0	0	0	0	0	0	0	0	0	0	0	0	0	0	0	0	0	0	0
dme-mir-ITS1_13_35_+	13	35	.............AGGAATTGATATATGCCAGTAA..................................	22	AGGAATTGATATATGCCAGTAA		0	0	0	0	0	0	0	0	0	0	0	0	0	0	0	0	0	0	0	0	0	0	0		0	0	0	0	0	0	0	0	0	0	0	0	0	0	0	0	0	0	0
dme-mir-ITS1_14_42_+	14	42	..............GGAATTGATATATGCCAGTAAAATGGTG...........................	28	GGAATTGATATATGCCAGTAAAATGGTG		0	0	0	0	0	0	0	0	0	0	0	0	0	0	0	0	0	0	0	0	0	0	0		0	0	0	0	0	0	0	0	0	0	0	0	0	0	0	0	0	0	0
dme-mir-ITS1_14_41_+	14	41	..............GGAATTGATATATGCCAGTAAAATGGT............................	27	GGAATTGATATATGCCAGTAAAATGGT		0	0	0	0	0	0	0	0	0	0	0	0	0	0	0	0	0	0	0	0	0	0	0		0	0	0	0	0	0	0	0	0	0	0	0	0	0	0	0	0	0	0
dme-mir-ITS1_15_43_+	15	43	...............GAATTGATATATGCCAGTAAAATGGTGT..........................	28	GAATTGATATATGCCAGTAAAATGGTGT		0	0	0	0	0	0	0	0	0	0	0	0	0	0	0	0	0	0	0	0	0	0	0		0	0	0	0	0	0	0	0	0	0	0	0	0	0	0	0	0	0	0
dme-mir-ITS1_15_35_+	15	35	...............GAATTGATATATGCCAGTAA..................................	20	GAATTGATATATGCCAGTAA		0	0	0	0	0	0	0	0	0	0	0	0	0	0	0	0	0	0	0	0	0	0	0		0	0	0	0	0	0	0	0	0	0	0	0	0	0	0	0	0	0	0
dme-mir-ITS1_16_45_+	16	45	................AATTGATATATGCCAGTAAAATGGTGTAT........................	29	AATTGATATATGCCAGTAAAATGGTGTAT		0	0	0	0	0	0	0	0	0	0	0	0	0	0	0	0	0	0	0	0	0	0	0		0	0	0	0	0	0	0	0	0	0	0	0	0	0	0	0	0	0	0
dme-mir-ITS1_16_44_+	16	44	................AATTGATATATGCCAGTAAAATGGTGTA.........................	28	AATTGATATATGCCAGTAAAATGGTGTA		0	0	0	0	0	0	0	0	0	0	0	0	0	0	0	0	0	0	0	0	0	0	0		0	0	0	0	0	0	0	0	0	0	0	0	0	0	0	0	0	0	0
dme-mir-ITS1_16_41_+	16	41	................AATTGATATATGCCAGTAAAATGGT............................	25	AATTGATATATGCCAGTAAAATGGT		0	0	0	0	0	0	0	0	0	0	0	0	0	0	0	0	0	0	0	0	0	0	0		0	0	0	0	0	0	0	0	0	0	0	0	0	0	0	0	0	0	0
dme-mir-ITS1_16_36_+	16	36	................AATTGATATATGCCAGTAAA.................................	20	AATTGATATATGCCAGTAAA		0	0	0	0	0	0	0	0	0	0	0	0	0	0	0	0	0	0	0	0	0	0	0		0	0	0	0	0	0	0	0	0	0	0	0	0	0	0	0	0	0	0
dme-mir-ITS1_17_45_+	17	45	.................ATTGATATATGCCAGTAAAATGGTGTAT........................	28	ATTGATATATGCCAGTAAAATGGTGTAT		0	0	0	0	0	0	0	0	0	0	0	0	0	0	0	0	0	0	0	0	0	0	0		0	0	0	0	0	0	0	0	0	0	0	0	0	0	0	0	0	0	0
dme-mir-ITS1_17_43_+	17	43	.................ATTGATATATGCCAGTAAAATGGTGT..........................	26	ATTGATATATGCCAGTAAAATGGTGT		0	0	0	0	0	0	0	0	0	0	0	0	0	0	0	0	0	0	0	0	0	0	0		0	0	0	0	0	0	0	0	0	0	0	0	0	0	0	0	0	0	0
dme-mir-ITS1_17_40_+	17	40	.................ATTGATATATGCCAGTAAAATGG.............................	23	ATTGATATATGCCAGTAAAATGG		0	0	0	0	0	0	0	0	0	0	0	0	0	0	0	0	0	0	0	0	0	0	0		0	0	0	0	0	0	0	0	0	0	0	0	0	0	0	0	0	0	0
dme-mir-ITS1_17_37_+	17	37	.................ATTGATATATGCCAGTAAAA................................	20	ATTGATATATGCCAGTAAAA		0	0	0	0	0	0	0	0	0	0	0	0	0	0	0	0	0	0	0	0	0	0	0		0	0	0	0	0	0	0	0	0	0	0	0	0	0	0	0	0	0	0
dme-mir-ITS1_18_40_+	18	40	..................TTGATATATGCCAGTAAAATGG.............................	22	TTGATATATGCCAGTAAAATGG		0	0	0	0	0	0	0	0	0	0	0	0	0	0	0	0	0	0	0	0	0	0	0		0	0	0	0	0	0	0	0	0	0	0	0	0	0	0	0	0	0	0
dme-mir-ITS1_18_37_+	18	37	..................TTGATATATGCCAGTAAAA................................	19	TTGATATATGCCAGTAAAA		0	0	0	0	0	0	0	0	0	0	0	0	0	0	0	0	0	0	0	0	0	0	0		0	0	0	0	0	0	0	0	0	0	0	0	0	0	0	0	0	0	0
dme-mir-ITS1_19_47_+	19	47	...................TGATATATGCCAGTAAAATGGTGTATTT......................	28	TGATATATGCCAGTAAAATGGTGTATTT		0	0	0	0	0	0	0	0	0	0	0	0	0	0	0	0	0	0	0	0	0	0	0		0	0	0	0	0	0	0	0	0	0	0	0	0	0	0	0	0	0	0
dme-mir-ITS1_19_45_+	19	45	...................TGATATATGCCAGTAAAATGGTGTAT........................	26	TGATATATGCCAGTAAAATGGTGTAT		0	0	0	0	0	0	0	0	0	0	0	0	0	0	0	0	0	0	0	0	0	0	0		0	0	0	0	0	0	0	0	0	0	0	0	0	0	0	0	0	0	0
dme-mir-ITS1_19_42_+	19	42	...................TGATATATGCCAGTAAAATGGTG...........................	23	TGATATATGCCAGTAAAATGGTG		0	0	0	0	0	0	0	0	0	0	0	0	0	0	0	0	0	0	0	0	0	0	0		0	0	0	0	0	0	0	0	0	0	0	0	0	0	0	0	0	0	0
dme-mir-ITS1_19_38_+	19	38	...................TGATATATGCCAGTAAAAT...............................	19	TGATATATGCCAGTAAAAT		0	0	0	0	0	0	0	0	0	0	0	0	0	0	0	0	0	0	0	0	0	0	0		0	0	0	0	0	0	0	0	0	0	0	0	0	0	0	0	0	0	0
dme-mir-ITS1_20_48_+	20	48	....................GATATATGCCAGTAAAATGGTGTATTTT.....................	28	GATATATGCCAGTAAAATGGTGTATTTT		0	0	0	0	0	0	0	0	0	0	0	0	0	0	0	0	0	0	0	0	0	0	0		0	0	0	0	0	0	0	0	0	0	0	0	0	0	0	0	0	0	0
dme-mir-ITS1_20_47_+	20	47	....................GATATATGCCAGTAAAATGGTGTATTT......................	27	GATATATGCCAGTAAAATGGTGTATTT		0	0	0	0	0	0	0	0	0	0	0	0	0	0	0	0	0	0	0	0	0	0	0		0	0	0	0	0	0	0	0	0	0	0	0	0	0	0	0	0	0	0
dme-mir-ITS1_20_44_+	20	44	....................GATATATGCCAGTAAAATGGTGTA.........................	24	GATATATGCCAGTAAAATGGTGTA		0	0	0	0	0	0	0	0	0	0	0	0	0	0	0	0	0	0	0	0	0	0	0		0	0	0	0	0	0	0	0	0	0	0	0	0	0	0	0	0	0	0
dme-mir-ITS1_20_42_+	20	42	....................GATATATGCCAGTAAAATGGTG...........................	22	GATATATGCCAGTAAAATGGTG		0	0	0	0	0	0	0	0	0	0	0	0	0	0	0	0	0	0	0	0	0	0	0		0	0	0	0	0	0	0	0	0	0	0	0	0	0	0	0	0	0	0
dme-mir-ITS1_20_41_+	20	41	....................GATATATGCCAGTAAAATGGT............................	21	GATATATGCCAGTAAAATGGT		0	0	0	0	0	0	0	0	0	0	0	0	0	0	0	0	0	0	0	0	0	0	0		0	0	0	0	0	0	0	0	0	0	0	0	0	0	0	0	0	0	0
dme-mir-ITS1_20_40_+	20	40	....................GATATATGCCAGTAAAATGG.............................	20	GATATATGCCAGTAAAATGG		0	0	0	0	0	0	0	0	0	0	0	0	0	0	0	0	0	0	0	0	0	0	0		0	0	0	0	0	0	0	0	0	0	0	0	0	0	0	0	0	0	0
dme-mir-ITS1_21_47_+	21	47	.....................ATATATGCCAGTAAAATGGTGTATTT......................	26	ATATATGCCAGTAAAATGGTGTATTT		0	0	0	0	0	0	0	0	0	0	0	0	0	0	0	0	0	0	0	0	0	0	0		0	0	0	0	0	0	0	0	0	0	0	0	0	0	0	0	0	0	0
dme-mir-ITS1_21_44_+	21	44	.....................ATATATGCCAGTAAAATGGTGTA.........................	23	ATATATGCCAGTAAAATGGTGTA		0	0	0	0	0	0	0	0	0	0	0	0	0	0	0	0	0	0	0	0	0	0	0		0	0	0	0	0	0	0	0	0	0	0	0	0	0	0	0	0	0	0
dme-mir-ITS1_21_42_+	21	42	.....................ATATATGCCAGTAAAATGGTG...........................	21	ATATATGCCAGTAAAATGGTG		0	0	0	0	0	0	0	0	0	0	0	0	0	0	0	0	0	0	0	0	0	0	0		0	0	0	0	0	0	0	0	0	0	0	0	0	0	0	0	0	0	0
dme-mir-ITS1_21_41_+	21	41	.....................ATATATGCCAGTAAAATGGT............................	20	ATATATGCCAGTAAAATGGT		0	0	0	0	0	0	0	0	0	0	0	0	0	0	0	0	0	0	0	0	0	0	0		0	0	0	0	0	0	0	0	0	0	0	0	0	0	0	0	0	0	0
dme-mir-ITS1_21_39_+	21	39	.....................ATATATGCCAGTAAAATG..............................	18	ATATATGCCAGTAAAATG		0	0	0	0	0	0	0	0	0	0	0	0	0	0	0	0	0	0	0	0	0	0	0		0	0	0	0	0	0	0	0	0	0	0	0	0	0	0	0	0	0	0
dme-mir-ITS1_22_42_+	22	42	......................TATATGCCAGTAAAATGGTG...........................	20	TATATGCCAGTAAAATGGTG		0	0	0	0	0	0	0	0	0	0	0	0	0	0	0	0	0	0	0	0	0	0	0		0	0	0	0	0	0	0	0	0	0	0	0	0	0	0	0	0	0	0
dme-mir-ITS1_23_42_+	23	42	.......................ATATGCCAGTAAAATGGTG...........................	19	ATATGCCAGTAAAATGGTG		0	0	0	0	0	0	0	0	0	0	0	0	0	0	0	0	0	0	0	0	0	0	0		0	0	0	0	0	0	0	0	0	0	0	0	0	0	0	0	0	0	0
dme-mir-ITS1_23_41_+	23	41	.......................ATATGCCAGTAAAATGGT............................	18	ATATGCCAGTAAAATGGT		0	0	0	0	0	0	0	0	0	0	0	0	0	0	0	0	0	0	0	0	0	0	0		0	0	0	0	0	0	0	0	0	0	0	0	0	0	0	0	0	0	0
dme-mir-ITS1_24_42_+	24	42	........................TATGCCAGTAAAATGGTG...........................	18	TATGCCAGTAAAATGGTG		0	0	0	0	0	0	0	0	0	0	0	0	0	0	0	0	0	0	0	0	0	0	0		0	0	0	0	0	0	0	0	0	0	0	0	0	0	0	0	0	0	0
dme-mir-ITS1_28_55_+	28	55	............................CCAGTAAAATGGTGTATTTTTAATTTC..............	27	CCAGTAAAATGGTGTATTTTTAATTTC		0	0	0	0	0	0	0	0	0	0	0	0	0	0	0	0	0	0	0	0	0	0	0		0	0	0	0	0	0	0	0	0	0	0	0	0	0	0	0	0	0	0
dme-mir-ITS1_28_46_+	28	46	............................CCAGTAAAATGGTGTATT.......................	18	CCAGTAAAATGGTGTATT		0	0	0	0	0	0	0	0	0	0	0	0	0	0	0	0	0	0	0	0	0	0	0		0	0	0	0	0	0	0	0	0	0	0	0	0	0	0	0	0	0	0
dme-mir-ITS1_29_58_+	29	58	.............................CAGTAAAATGGTGTATTTTTAATTTCTTT...........	29	CAGTAAAATGGTGTATTTTTAATTTCTTT		0	0	0	0	0	0	0	0	0	0	0	0	0	0	0	0	0	0	0	0	0	0	0		0	0	0	0	0	0	0	0	0	0	0	0	0	0	0	0	0	0	0
dme-mir-ITS1_29_50_+	29	50	.............................CAGTAAAATGGTGTATTTTTA...................	21	CAGTAAAATGGTGTATTTTTA		0	0	0	0	0	0	0	0	0	0	0	0	0	0	0	0	0	0	0	0	0	0	0		0	0	0	0	0	0	0	0	0	0	0	0	0	0	0	0	0	0	0
dme-mir-ITS1_30_58_+	30	58	..............................AGTAAAATGGTGTATTTTTAATTTCTTT...........	28	AGTAAAATGGTGTATTTTTAATTTCTTT		0	0	0	0	0	0	0	0	0	0	0	0	0	0	0	0	0	0	0	0	0	0	0		0	0	0	0	0	0	0	0	0	0	0	0	0	0	0	0	0	0	0
dme-mir-ITS1_30_57_+	30	57	..............................AGTAAAATGGTGTATTTTTAATTTCTT............	27	AGTAAAATGGTGTATTTTTAATTTCTT		0	0	0	0	0	0	0	0	0	0	0	0	0	0	0	0	0	0	0	0	0	0	0		0	0	0	0	0	0	0	0	0	0	0	0	0	0	0	0	0	0	0
dme-mir-ITS1_31_59_+	31	59	...............................GTAAAATGGTGTATTTTTAATTTCTTTC..........	28	GTAAAATGGTGTATTTTTAATTTCTTTC		0	0	0	0	0	0	0	0	0	0	0	0	0	0	0	0	0	0	0	0	0	0	0		0	0	0	0	0	0	0	0	0	0	0	0	0	0	0	0	0	0	0
dme-mir-ITS1_31_58_+	31	58	...............................GTAAAATGGTGTATTTTTAATTTCTTT...........	27	GTAAAATGGTGTATTTTTAATTTCTTT		0	0	0	0	0	0	0	0	0	0	0	0	0	0	0	0	0	0	0	0	0	0	0		0	0	0	0	0	0	0	0	0	0	0	0	0	0	0	0	0	0	0
dme-mir-ITS1_31_56_+	31	56	...............................GTAAAATGGTGTATTTTTAATTTCT.............	25	GTAAAATGGTGTATTTTTAATTTCT		0	0	0	0	0	0	0	0	0	0	0	0	0	0	0	0	0	0	0	0	0	0	0		0	0	0	0	0	0	0	0	0	0	0	0	0	0	0	0	0	0	0
dme-mir-ITS1_32_51_+	32	51	................................TAAAATGGTGTATTTTTAA..................	19	TAAAATGGTGTATTTTTAA		0	0	0	0	0	0	0	0	0	0	0	0	0	0	0	0	0	0	0	0	0	0	0		0	0	0	0	0	0	0	0	0	0	0	0	0	0	0	0	0	0	0
dme-mir-ITS1_33_63_+	33	63	.................................AAAATGGTGTATTTTTAATTTCTTTCAATA......	30	AAAATGGTGTATTTTTAATTTCTTTCAATA		0	0	0	0	0	0	0	0	0	0	0	0	0	0	0	0	0	0	0	0	0	0	0		0	0	0	0	0	0	0	0	0	0	0	0	0	0	0	0	0	0	0
dme-mir-ITS1_33_62_+	33	62	.................................AAAATGGTGTATTTTTAATTTCTTTCAAT.......	29	AAAATGGTGTATTTTTAATTTCTTTCAAT		0	0	0	0	0	0	0	0	0	0	0	0	0	0	0	0	0	0	0	0	0	0	0		0	0	0	0	0	0	0	0	0	0	0	0	0	0	0	0	0	0	0
dme-mir-ITS1_33_55_+	33	55	.................................AAAATGGTGTATTTTTAATTTC..............	22	AAAATGGTGTATTTTTAATTTC		0	0	0	0	0	0	0	0	0	0	0	0	0	0	0	0	0	0	0	0	0	0	0		0	0	0	0	0	0	0	0	0	0	0	0	0	0	0	0	0	0	0
dme-mir-ITS1_34_63_+	34	63	..................................AAATGGTGTATTTTTAATTTCTTTCAATA......	29	AAATGGTGTATTTTTAATTTCTTTCAATA		0	0	0	0	0	0	0	0	0	0	0	0	0	0	0	0	0	0	0	0	0	0	0		0	0	0	0	0	0	0	0	0	0	0	0	0	0	0	0	0	0	0
dme-mir-ITS1_34_62_+	34	62	..................................AAATGGTGTATTTTTAATTTCTTTCAAT.......	28	AAATGGTGTATTTTTAATTTCTTTCAAT		0	0	0	0	0	0	0	0	0	0	0	0	0	0	0	0	0	0	0	0	0	0	0		0	0	0	0	0	0	0	0	0	0	0	0	0	0	0	0	0	0	0
dme-mir-ITS1_34_57_+	34	57	..................................AAATGGTGTATTTTTAATTTCTT............	23	AAATGGTGTATTTTTAATTTCTT		0	0	0	0	0	0	0	0	0	0	0	0	0	0	0	0	0	0	0	0	0	0	0		0	0	0	0	0	0	0	0	0	0	0	0	0	0	0	0	0	0	0
dme-mir-ITS1_35_64_+	35	64	...................................AATGGTGTATTTTTAATTTCTTTCAATAA.....	29	AATGGTGTATTTTTAATTTCTTTCAATAA		0	0	0	0	0	0	0	0	0	0	0	0	0	0	0	0	0	0	0	0	0	0	0		0	0	0	0	0	0	0	0	0	0	0	0	0	0	0	0	0	0	0
dme-mir-ITS1_35_58_+	35	58	...................................AATGGTGTATTTTTAATTTCTTT...........	23	AATGGTGTATTTTTAATTTCTTT		0	0	0	0	0	0	0	0	0	0	0	0	0	0	0	0	0	0	0	0	0	0	0		0	0	0	0	0	0	0	0	0	0	0	0	0	0	0	0	0	0	0
dme-mir-ITS1_35_55_+	35	55	...................................AATGGTGTATTTTTAATTTC..............	20	AATGGTGTATTTTTAATTTC		0	0	0	0	0	0	0	0	0	0	0	0	0	0	0	0	0	0	0	0	0	0	0		0	0	0	0	0	0	0	0	0	0	0	0	0	0	0	0	0	0	0
dme-mir-ITS1_35_54_+	35	54	...................................AATGGTGTATTTTTAATTT...............	19	AATGGTGTATTTTTAATTT		0	0	0	0	0	0	0	0	0	0	0	0	0	0	0	0	0	0	0	0	0	0	0		0	0	0	0	0	0	0	0	0	0	0	0	0	0	0	0	0	0	0
dme-mir-ITS1_35_53_+	35	53	...................................AATGGTGTATTTTTAATT................	18	AATGGTGTATTTTTAATT		0	0	0	0	0	0	0	0	0	0	0	0	0	0	0	0	0	0	0	0	0	0	0		0	0	0	0	0	0	0	0	0	0	0	0	0	0	0	0	0	0	0
dme-mir-ITS1_36_65_+	36	65	....................................ATGGTGTATTTTTAATTTCTTTCAATAAA....	29	ATGGTGTATTTTTAATTTCTTTCAATAAA		0	0	0	0	0	0	0	0	0	0	0	0	0	0	0	0	0	0	0	0	0	0	0		0	0	0	0	0	0	0	0	0	0	0	0	0	0	0	0	0	0	0
dme-mir-ITS1_38_59_+	38	59	......................................GGTGTATTTTTAATTTCTTTC..........	21	GGTGTATTTTTAATTTCTTTC		0	0	0	0	0	0	0	0	0	0	0	0	0	0	0	0	0	0	0	0	0	0	0		0	0	0	0	0	0	0	0	0	0	0	0	0	0	0	0	0	0	0
dme-mir-ITS1_38_57_+	38	57	......................................GGTGTATTTTTAATTTCTT............	19	GGTGTATTTTTAATTTCTT		0	0	0	0	0	0	0	0	0	0	0	0	0	0	0	0	0	0	0	0	0	0	0		0	0	0	0	0	0	0	0	0	0	0	0	0	0	0	0	0	0	0
dme-mir-ITS1_39_60_+	39	60	.......................................GTGTATTTTTAATTTCTTTCA.........	21	GTGTATTTTTAATTTCTTTCA		0	0	0	0	0	0	0	0	0	0	0	0	0	0	0	0	0	0	0	0	0	0	0		0	0	0	0	0	0	0	0	0	0	0	0	0	0	0	0	0	0	0
dme-mir-ITS1_39_58_+	39	58	.......................................GTGTATTTTTAATTTCTTT...........	19	GTGTATTTTTAATTTCTTT		0	0	0	0	0	0	0	0	0	0	0	0	0	0	0	0	0	0	0	0	0	0	0		0	0	0	0	0	0	0	0	0	0	0	0	0	0	0	0	0	0	0
dme-mir-ITS1_41_68_+	41	68	.........................................GTATTTTTAATTTCTTTCAATAAAAAC.	27	GTATTTTTAATTTCTTTCAATAAAAAC		0	0	0	0	0	0	0	0	0	0	0	0	0	0	0	0	0	0	0	0	0	0	0		0	0	0	0	0	0	0	0	0	0	0	0	0	0	0	0	0	0	0
dme-mir-ITS1_42_67_+	42	67	..........................................TATTTTTAATTTCTTTCAATAAAAA..	25	TATTTTTAATTTCTTTCAATAAAAA		0	0	0	0	0	0	0	0	0	0	0	0	0	0	0	0	0	0	0	0	0	0	0		0	0	0	0	0	0	0	0	0	0	0	0	0	0	0	0	0	0	0
dme-mir-ITS1_43_69_+	43	69	...........................................ATTTTTAATTTCTTTCAATAAAAACA	26	ATTTTTAATTTCTTTCAATAAAAACA		0	0	0	0	0	0	0	0	0	0	0	0	0	0	0	0	0	0	0	0	0	0	0		0	0	0	0	0	0	0	0	0	0	0	0	0	0	0	0	0	0	0
dme-mir-ITS1_43_67_+	43	67	...........................................ATTTTTAATTTCTTTCAATAAAAA..	24	ATTTTTAATTTCTTTCAATAAAAA		0	0	0	0	0	0	0	0	0	0	0	0	0	0	0	0	0	0	0	0	0	0	0		0	0	0	0	0	0	0	0	0	0	0	0	0	0	0	0	0	0	0
dme-mir-ITS1_43_61_+	43	61	...........................................ATTTTTAATTTCTTTCAA........	18	ATTTTTAATTTCTTTCAA		0	0	0	0	0	0	0	0	0	0	0	0	0	0	0	0	0	0	0	0	0	0	0		0	0	0	0	0	0	0	0	0	0	0	0	0	0	0	0	0	0	0
dme-mir-ITS1_44_69_+	44	69	............................................TTTTTAATTTCTTTCAATAAAAACA	25	TTTTTAATTTCTTTCAATAAAAACA		0	0	0	0	0	0	0	0	0	0	0	0	0	0	0	0	0	0	0	0	0	0	0		0	0	0	0	0	0	0	0	0	0	0	0	0	0	0	0	0	0	0
dme-mir-ITS1_44_67_+	44	67	............................................TTTTTAATTTCTTTCAATAAAAA..	23	TTTTTAATTTCTTTCAATAAAAA		0	0	0	0	0	0	0	0	0	0	0	0	0	0	0	0	0	0	0	0	0	0	0		0	0	0	0	0	0	0	0	0	0	0	0	0	0	0	0	0	0	0
dme-mir-ITS1_44_66_+	44	66	............................................TTTTTAATTTCTTTCAATAAAA...	22	TTTTTAATTTCTTTCAATAAAA		0	0	0	0	0	0	0	0	0	0	0	0	0	0	0	0	0	0	0	0	0	0	0		0	0	0	0	0	0	0	0	0	0	0	0	0	0	0	0	0	0	0
dme-mir-ITS1_45_69_+	45	69	.............................................TTTTAATTTCTTTCAATAAAAACA	24	TTTTAATTTCTTTCAATAAAAACA		0	0	0	0	0	0	0	0	0	0	0	0	0	0	0	0	0	0	0	0	0	0	0		0	0	0	0	0	0	0	0	0	0	0	0	0	0	0	0	0	0	0
dme-mir-ITS1_45_68_+	45	68	.............................................TTTTAATTTCTTTCAATAAAAAC.	23	TTTTAATTTCTTTCAATAAAAAC		0	0	0	0	0	0	0	0	0	0	0	0	0	0	0	0	0	0	0	0	0	0	0		0	0	0	0	0	0	0	0	0	0	0	0	0	0	0	0	0	0	0
dme-mir-ITS1_46_68_+	46	68	..............................................TTTAATTTCTTTCAATAAAAAC.	22	TTTAATTTCTTTCAATAAAAAC		0	0	0	0	0	0	0	0	0	0	0	0	0	0	0	0	0	0	0	0	0	0	0		0	0	0	0	0	0	0	0	0	0	0	0	0	0	0	0	0	0	0
dme-mir-ITS1_46_64_+	46	64	..............................................TTTAATTTCTTTCAATAA.....	18	TTTAATTTCTTTCAATAA		0	0	0	0	0	0	0	0	0	0	0	0	0	0	0	0	0	0	0	0	0	0	0		0	0	0	0	0	0	0	0	0	0	0	0	0	0	0	0	0	0	0
dme-mir-ITS1_47_68_+	47	68	...............................................TTAATTTCTTTCAATAAAAAC.	21	TTAATTTCTTTCAATAAAAAC		0	0	0	0	0	0	0	0	0	0	0	0	0	0	0	0	0	0	0	0	0	0	0		0	0	0	0	0	0	0	0	0	0	0	0	0	0	0	0	0	0	0
dme-mir-ITS1_47_67_+	47	67	...............................................TTAATTTCTTTCAATAAAAA..	20	TTAATTTCTTTCAATAAAAA		0	0	0	0	0	0	0	0	0	0	0	0	0	0	0	0	0	0	0	0	0	0	0		0	0	0	0	0	0	0	0	0	0	0	0	0	0	0	0	0	0	0
dme-mir-ITS1_48_69_+	48	69	................................................TAATTTCTTTCAATAAAAACA	21	TAATTTCTTTCAATAAAAACA		0	0	0	0	0	0	0	0	0	0	0	0	0	0	0	0	0	0	0	0	0	0	0		0	0	0	0	0	0	0	0	0	0	0	0	0	0	0	0	0	0	0
dme-mir-ITS1_49_69_+	49	69	.................................................AATTTCTTTCAATAAAAACA	20	AATTTCTTTCAATAAAAACA		0	0	0	0	0	0	0	0	0	0	0	0	0	0	0	0	0	0	0	0	0	0	0		0	0	0	0	0	0	0	0	0	0	0	0	0	0	0	0	0	0	0
dme-mir-ITS1_49_68_+	49	68	.................................................AATTTCTTTCAATAAAAAC.	19	AATTTCTTTCAATAAAAAC		0	0	0	0	0	0	0	0	0	0	0	0	0	0	0	0	0	0	0	0	0	0	0		0	0	0	0	0	0	0	0	0	0	0	0	0	0	0	0	0	0	0
dme-mir-ITS1_49_67_+	49	67	.................................................AATTTCTTTCAATAAAAA..	18	AATTTCTTTCAATAAAAA		0	0	0	0	0	0	0	0	0	0	0	0	0	0	0	0	0	0	0	0	0	0	0		0	0	0	0	0	0	0	0	0	0	0	0	0	0	0	0	0	0	0
dme-mir-ITS1_50_68_+	50	68	..................................................ATTTCTTTCAATAAAAAC.	18	ATTTCTTTCAATAAAAAC		0	0	0	0	0	0	0	0	0	0	0	0	0	0	0	0	0	0	0	0	0	0	0		0	0	0	0	0	0	0	0	0	0	0	0	0	0	0	0	0	0	0
dme-mir-ITS1_51_69_+	51	69	...................................................TTTCTTTCAATAAAAACA	18	TTTCTTTCAATAAAAACA		0	0	0	0	0	0	0	0	0	0	0	0	0	0	0	0	0	0	0	0	0	0	0		0	0	0	0	0	0	0	0	0	0	0	0	0	0	0	0	0	0	0
[truncated: 43 more columns]

## Sheet: key
normReads are raw read counts divided by number of maphits
only sense mappers to dme-mir-ITS1 was used in the calculations
normRPMdmestemloopmirbasev20plusITS1 are (raw reads divided by map hit count) divided by dmestemloopmirbasev20plusITS1 count times 1million
only sense mappers to dme-mir-ITS1 were used
