# Supplementary material
Source: HighWire-hosted journal article supplement (doi:10.1101/rna.049098.114)
Supplement: TableS3_miRNA_mapping.xlsx [file TableS3_miRNA_mapping.xlsx]

## Sheet: 1-count
ACCESSION	LENGTH	MIRNA	Tissues and organs	V063V0632...combined V063 and V0632.CS,ovary,AGO1IP	V064V0642...combined V064 and V0642.ago2[414], ovary, AGO1IP	V065V0652...combined V065 and V0652.dcr-2[L811fsX], ovary, AGO1IP	V066V0662...combined V066 and V0662.r2d2[1], ovary, AGO1IP	V097.SRR069232.GSM609246..CS ovary	V0892.SRR073602.GSM628272.resequenced of V089.ago2[414] ovary total RNA Â	V098.SRR069233.GSM609245..dcr-2[L811fsX] ovary	V0882.SRR073601.GSM628271.resequenced of V088.r2d2[1] ovary total RNA Â	SRR068998.S2.head female	SRR013604.S22.head female	SRR016854.S24.male body	SRR018039.S23.female body	SRR069835.S1.head male	SRR069836.S3.male body	SRR069837.S4.female body	SRR069236.V090.male body	SRR069832.S5.Imaginal disc	SRR016853.S21.imaginal disc brain	SRR031692..head	SRR031696..AGO1IP head	SRR032152..AGO1IP head	SRR060644..ovary A2	SRR060647..AGO2 IP ovary A2	Cell lines	V094....FLAG-IP from S2-R+, FLAG-HA-AGO2	V095....AGO1-IP from S2-R+, FLAG-HA-AGO2	SRR013547.V020, SRR013548.V025 combined.cell line S2R+	SRR1015573..GFP knockdown, AGO1IP, S2R+	SRR1015574..dcr1 knockdown, AGO1IP, S2R+	SRR069830.S15.cell line S2-GMR	SRR013618.S30.cell line S2-GMR	SRR069831.S16.cell line KC	SRR016855.S33.cell line KC	SRR029028..cell line S2-NP mock	SRR029029..dcr1 knocdown S2-NP	SRR029030..dcr2 knockdown S2-NP	SRR029031..loqs knockdown S2-NP	SRR029032..r2d2 knockdown S2-NP	SRR029033..lacZ knockdown S2-NP	SRR032092..cell line S2-NP mock oxidized	SRR032093..ago1 knockdown S2-NP	SRR032094..ago2 knockdown S2-NP	SRR032095..dcr2 knockdown AGO1IP S2-NP	SRR032096..dcr2 knockdown AGO2IP S2-NP	SRR015372.V067.cell line S2-NP	SRR019717.OSS2.cell line OSS
ACCESSION	LENGTH	MIRNA	SUM	V063V0632.sense.normcount	V064V0642.sense.normcount	V065V0652.sense.normcount	V066V0662.sense.normcount	V097.sense.normcount	V0892.sense.normcount	V098.sense.normcount	V0882.sense.normcount	SRR068998.sense.normcount	SRR013604.sense.normcount	SRR016854.sense.normcount	SRR018039.sense.normcount	SRR069835.sense.normcount	SRR069836.sense.normcount	SRR069837.sense.normcount	V090.sense.normcount	SRR069832.sense.normcount	SRR016853.sense.normcount	SRR031692.sense.normcount	SRR031696.sense.normcount	SRR032152.sense.normcount	SRR060644.sense.normcount	SRR060647.sense.normcount	SUM	V094.sense.normcount	V095.sense.normcount	V020V025.sense.normcount	SRR1015573.sense.normcount	SRR1015574.sense.normcount	SRR069830.sense.normcount	SRR013618.sense.normcount	SRR069831.sense.normcount	SRR016855.sense.normcount	SRR029028.sense.normcount	SRR029029.sense.normcount	SRR029030.sense.normcount	SRR029031.sense.normcount	SRR029032.sense.normcount	SRR029033.sense.normcount	SRR032092.sense.normcount	SRR032093.sense.normcount	SRR032094.sense.normcount	SRR032095.sense.normcount	SRR032096.sense.normcount	SRR015372.sense.normcount	SRR019717.sense.normcount
MI0005848	174	dme-mir-989	14264008	2237984	914424	1842264	654223	2801286	1384650	2649525	1611362	10	17	50	8000	1	13	2953	284	17	33	17	24	104	145292	11475	60035	30	105	569	1126	906	3	6	158	191	7	95	42	4	149	48	575	13	237	8	5	52	15287
MI0000128	87	dme-mir-8	16905370	2255783	1544957	2010232	1688303	1726779	1184397	1488748	1553953	12471	27113	63037	11016	3550	6243	5266	2271467	2110	1961	178053	194441	567070	94944	13476	4874924	90254	1013454	129795	226805	246684	3999	6286	18542	45802	27568	7243	9821	35437	15271	9504	5763	8316	13246	42103	1421	53928	97
MI0000354	100	dme-mir-184	8389399	863267	883645	1017764	800561	1254849	974123	1319303	565080	6442	12126	11153	5295	2843	1205	2746	368862	4919	4616	44779	61343	157948	21452	5078	48865371	240582	4301595	1230354	7923961	12588161	53969	168025	72980	281390	114467	40535	66429	324771	66144	85310	12932	62026	45425	722214	36475	549175	11335
MI0000387	81	dme-bantam	15463653	2379276	2972296	2470515	1783063	1174977	950284	1165490	1659641	1538	3896	5090	1910	469	714	693	587163	866	884	55453	42622	96850	106764	3199	65048150	945336	9139993	2735464	11598545	12244543	35417	53562	18231	36611	943066	190817	301784	798747	331964	251753	20288	147015	248203	3453036	37985	2350011	30725
MI0000430	68	dme-mir-318	14456948	2400704	898123	4370029	4133531	505592	683855	749271	632864	17	14	78	12860	5	28	3748	132	8	25	98	150	490	59745	5581	11901	29	420	5	965	1116	13	23	60	162	179	66	171	70	395	107	763	45	386	508	8	803	287
MI0005855	91	dme-mir-994	4456627	429517	534850	991466	765200	462735	364164	433999	433386	6	8	41	6444	0	14	3036	36	2	9	55	30	83	20069	11477	2579	8	52	2	218	185	5	23	27	70	103	66	67	37	82	56	107	63	90	40	8	191	96
MI0000118	72	dme-mir-2a-2	8.81877e+06	1.19246e+06	2.36193e+06	1.58156e+06	1.21319e+06	440957	376207	725872	746874	4284.43	12417.6	9252.53	2367.23	3055.97	715.833	941.667	43330.1	3015.13	3806.7	13281.3	10774.8	36481.8	34343.9	1659.5	1.03429e+07	69961.6	1.75239e+06	343014	364305	754900	6777.57	24450.6	18134.6	98489.5	45553.2	23341.3	33499.6	71572.6	37963.3	35394.2	6932	14733	22142.8	310687	6433.27	158423	16474.9
MI0000356	98	dme-mir-275	5693146	938125	1172771	1125483	1009398	408317	458678	414419	103447	121	462	561	364	68	118	231	31075	537	511	3755	3977	10478	8972	1278	2313605	3116	94131	4973	593572	504954	455	1332	828	3651	11345	8186	6875	6839	8157	9877	293	2044	5244	72153	298	10649	21768
MI0000415	91	dme-mir-9b	5162548	944564	984160	1097624	847415	301433	287135	263177	376954	233	534	2095	2312	64	129	1018	8602	2052	1837	1960	1529	4635	32075	1011	1130000	7586	119099	13261	26401	13995	2450	2881	7884	10764	12396	1411	4135	3594	3670	2345	342	2241	3737	11085	259	17686	16980
MI0000371	99	dme-mir-34	4657042	472758	330310	495592	271438	299900	283530	501215	139284	51366	161174	113388	25196	25515	11552	9810	756810	5239	5697	81237	128002	467371	19877	781	2413126	34338	571945	47106	125831	59861	13937	32315	15124	34182	13351	4163	6456	28263	9712	5090	700	8143	6891	24740	1023	49306	10628
MI0000343	94	dme-mir-263a	3425408	623014	528442	841299	241094	286587	240023	425384	68256	854	3173	4993	1402	321	450	435	108552	367	894	15685	5882	15701	7289	5311	41328	1018	8257	157	7852	5153	66	110	3	43	994	196	441	852	315	415	686	348	187	2726	108	678	85
MI0000413	92	dme-mir-9c	3321489	522511	616322	632144	523562	262891	206950	265410	241857	312	981	1326	1918	121	125	753	8432	1384	1753	1488	826	2602	25039	2782	517529	6533	48956	4769	40711	22330	1896	1867	3767	7021	4363	470	1466	1696	1146	741	672	1528	1174	3633	164	7067	27878
MI0000117	76	dme-mir-2a-1	5.07345e+06	731799	1.35861e+06	935441	719432	201999	209919	423236	365752	2122.43	5922.6	4405.03	943.733	2219.97	432.833	447.167	35226.1	1255.13	1661.7	9933.8	9085.83	30652.8	22388.4	566	7.33181e+06	43532.1	1.46855e+06	173225	347271	742857	3061.07	12117.1	7972.6	48890	38257.7	23043.3	29144.1	63285.6	30939.3	28282.2	934	9180.03	19427.8	274709	2466.27	117177	13447.9
MI0000119	77	dme-mir-2b-1	2.7305e+06	402100	487460	531626	383029	159165	195229	295486	162036	1606.1	3446.1	3322.2	890.4	888.3	267	401.5	48496.6	1372.3	1601.2	6504.3	6913.5	19875.2	17928.7	851.5	5.17151e+06	31569.9	784796	126219	387966	478636	5473.4	11692.3	7079.1	37854.8	25726.4	16765	16339.4	60315.3	19854	16353.7	560.5	21136.2	13151.1	179278	2734.6	85244.3	11412.6
MI0000416	78	dme-let-7	1336827	172332	83291	169010	102455	156171	66658	174907	110842	8758	21795	19145	4383	3630	1656	1709	177007	449	444	25588	7048	22376	6652	521	203048	45	229	90	5104	6250	5	110	4	135	43	60	39	22	80	85	192	7	102	5	1	15	267
MI0000120	83	dme-mir-2b-2	2.63716e+06	392574	470476	518081	369215	153595	183346	277757	159411	1611.1	3433.1	3402.7	934.9	903.3	281	413	44166.6	1381.3	1609.2	7227.8	7111.5	20189.2	18488.2	1550	4.76462e+06	42030.4	722838	122708	385087	474862	5382.9	11817.8	8004.1	39797.3	26103.9	16117	16492.9	53532.3	20042	15536.7	1221.5	33130.2	13301.1	159255	3182.6	80220.3	11177.6
MI0000135	70	dme-mir-13b-2	3.3428e+06	600618	570766	719966	671207	114349	111092	174913	280408	2099	2508.5	3726	1295	784.5	276.5	562.5	15146.5	1228	1260.5	11169.5	7847	26875.7	24500	206.5	3.03789e+06	12025.5	286150	25152.5	991430	833472	6067	9024	5204	27085.5	20934.5	4373	11746.5	9039.5	7854	4909	520.5	9174	9411.5	42890.5	273	37489	8458
MI0000359	98	dme-mir-276a	2.00877e+06	192079	104887	236782	54455	109248	69544.5	128048	93076.5	35675.5	66502.5	78083.5	13216	19816	8071	5563	100896	14344.5	17699.5	195450	96619	350609	12405	5703.5	2.00675e+06	188572	58937.5	54172	353048	199444	11393.5	11173	12396	36301	9272.5	2403	4963	5461.5	3722.5	3130	1836	5745	3105	6480.5	11560.5	15914.5	8703
MI0000134	68	dme-mir-13b-1	3.29526e+06	592412	565988	714134	666421	106309	107004	168075	276015	2087	2417.5	3683	1256	784.5	272.5	551.5	15010.5	1198	1201.5	11192.5	7846	26862.7	24375	161.5	3.00077e+06	9614.5	284076	23834.5	990828	832958	5770	8579	4904	26297.5	20113.5	4257	10505.5	8610.5	7490	4687	437.5	6066	9085.5	42843.5	266	36344	8198
MI0000131	75	dme-mir-11	2290172	331779	393647	571482	280339	94748	108341	143438	230749	2215	3175	13072	3769	933	867	1324	39135	2273	2300	22966	4900	20048	17478	1194	3827633	21115	284215	107446	893938	716713	15676	20055	9321	30399	55182	10995	19643	17764	18374	17346	5554	11671	17042	57220	971	58923	13196
MI0000375	99	dme-mir-276b	788936	85154	57549	98110.5	18602	93754	54777.5	105124	51315.5	8041.5	19492.5	10865.5	2907	3952	2119	1387	83332	3250.5	5004.5	27384.5	11418	36501	3242	5653.5	633842	183072	37576.5	33279	4674.5	2827	2263.5	3056	5265	17185	2615.5	382	1741	3784.5	516.5	713	1505	4621	325	2492.5	11522.5	5680.5	613
MI0000000	69	dme-mir-10404/mir-ITS1	561005	97730	40706	115594	52557	87209	53910	45727	47318	367	640	1662	784	47	176	349	7283	393	452	1093	1129	2410	2514	955	123116	904	4016	1120	4269	1513	311	500	394	1377	545	29	171	125	126	128	100	143	105	306	25	996	640
MI0000116	91	dme-mir-1	2850868	257940	274861	402548	188132	81242	74378	133365	242982	12308	18263	83629	16708	1411	11592	8717	926294	555	610	57344	15481	35024	7304	180	37237	41	366	19	5986	6600	23	246	55	474	170	378	202	4	634	209	3020	60	508	2	1	3	380
MI0000374	97	dme-mir-79	1473845	293421	278211	371446	197356	62610	52546	64949	101765	588	937	1000	805	291	131	318	3174	1233	1563	4491	1648	4017	30298	1047	476044	1767	13369	1850	2528	2602	2040	2965	3608	12602	5191	914	1377	4193	1055	707	667	782	956	16635	286	3732	61039
MI0000420	92	dme-mir-31a	738616	75368	87986	130607	51640	60225	56916	153005	61733	650	1978	4093	1027	278	431	423	38020	296	337	2491	1935	6321	2610	246	5649	8	259	57	774	632	5	19	12	39	32	21	26	6	43	23	112	4	25	31	1	16	8
MI0000127	88	dme-mir-7	641838	89282	34644	107941	81314	59393	61929	59755	36426	1992	5011	1129	521	443	122	193	24976	2108	2241	22653	14541	34358	782	84	121111	2407	17864	1019	22137	30829	330	328	239	635	247	97	402	1056	103	113	31	62	117	4537	79	380	774
MI0005856	90	dme-mir-995	873110	126670	155191	183636	132446	53078	45604	84139	65358	360	1357	329	833	184	43	283	1156	989	1683	1719	528	1926	13460	2138	851202	13651	25880	9271	287319	229522	3749	6256	3746	10900	8927	1764	4780	2376	2714	2878	2849	4515	2919	10720	808	9047	6782
MI0000424	66	dme-mir-312	630483	73817	98719	103915	155716	52765	56351	52443	26105	29	76	313	1055	2	29	568	450	752	925	17	23	91	5499	823	28043	4	22	2	9214	16342	3	12	6	513	2	7	13	0	11	10	42	1	10	0	0	6	4
MI0005857	97	dme-mir-996	1337462	208876	293180	255136	207667	50711	36782	47611	115513	2122	4440	5429	3243	916	775	1470	7018	3167	3823	6305	7386	25502	45256	5134	2032833	22685	79487	56561	173577	232941	23103	45831	10275	42884	30960	9038	16306	43553	13535	9158	1150	7231	16019	144054	2663	44782	133189
MI0000357	95	dme-mir-92a	260227	37429	17361	46687	31142	42784	25998	30405	10711	262	927	262	1613	64	33	826	618	2746	3738	230	16	90	2080	4205	174764	478	848	105	6253	7959	13	27	1465	4378	1	4	5	6	4	2	36	0	2	3	2	3	25051
MI0000370	92	dme-mir-281-2	646825	127452	79858	123160	85846	36368.5	30924	78478.5	26673	67	154.5	4883.5	926.5	17.5	511.5	374	38124.5	37	47.5	1079.5	1084.5	3461	7185	111.5	28968.5	135	4362	255	9664.5	3590.5	122.5	203.5	87.5	279.5	333	17	177.5	121.5	169.5	84	164.5	42.5	110.5	568	9.5	297.5	168.5
MI0000364	99	dme-mir-33	617547	138903	38986	167893	45580	23993	20142	30556	53664	208	1506	957	344	152	127	129	6555	122	206	13116	10486	51655	11194	1073	1044921	52546	50511	22032	93928	37955	1922	5915	2690	7953	9943	1391	4825	3300	1606	1970	7765	3405	1126	8673	1284	26283	30129
MI0000366	90	dme-mir-281-1	294212	44101.5	37860	43801.5	32377	22150.5	19054	39385.5	20201	50	109.5	3715.5	730.5	12.5	409.5	275	22190.5	30	38.5	441.5	518.5	1559	4860	340.5	16292.5	194	2250	279	4403.5	1470.5	90.5	125.5	66.5	169.5	217	21	75.5	96.5	118.5	74	85.5	41.5	89.5	185	54.5	191.5	76.5
MI0005860	143	dme-mir-998	575321	123599	101476	146667	90103	19921	19601	26692	30869	620	1837	520	316	311	68	137	1741	915	1782	1275	719	2438	3513	201	333803	7970	92122	8822	22367	5855	3116	4635	3959	9395	4629	256	2977	854	1416	1317	752	1679	877	6676	214	3459	1799
MI0000136	63	dme-mir-14	1628021	124321	15533	108416	90467	19076	13944	18849	29580	67221	115823	98080	31687	28683	16669	10710	8026	7139	10228	169322	135443	498710	9930	164	3441649	23837	20642	16470	515137	381742	182554	326673	130007	392046	10838	7604	12359	3553	9807	6041	367	3489	11501	3269	1577	8123	61465
MI0005861	105	dme-mir-999	200982	18946	19754	21158	17698	18729	7810	15772	9834	1509	2539	636	144	948	94	65	16386	326	408	23230	5508	18971	465	52	189667	840	11290	2286	82790	39493	247	195	374	625	2454	327	1029	269	1005	1144	106	539	732	817	12	1011	916
MI0000132	74	dme-mir-12	429830	65140	32778	61397	38542	18711	11442	24763	60230	1531	4066	60445	9266	493	8767	2898	5285	3158	4073	2994	1017	3369	9321	144	94928	267	175	353	3569	1908	415	556	7013	12571	82	6	50	27	30	21	93	22	34	10	1	108	3269
MI0000412	73	dme-mir-305	816058	134626	63341	163952	102678	16707	15348	29022	78033	4179	10363	13053	3699	2175	1551	1441	3385	2288	4777	40238	22070	91516	11052	564	962725	15416	16384	4740	130628	80317	3314	5063	6872	32036	2480	858	2661	616	1354	959	296	620	1077	1200	33	4501	49347
MI0000411	88	dme-mir-304	243617	50494	24768	48567	28513	15915	13999	16507	25428	22	69	788	156	15	86	65	5450	64	69	3163	1703	3520	4090	166	91980	176	1514	340	10542	4785	34	38	841	1394	152	17	89	140	68	62	8	47	55	37	0	206	8493
MI0000382	99	dme-mir-87	58803	8433	383	2498	3163	15403	2175	4191	7036	397	1176	1108	218	129	108	113	10582	40	35	730	104	218	421	142	347	1	3	0	14	8	0	0	2	0	18	0	4	34	11	9	44	1	14	37	1	68	0
MI0000130	77	dme-mir-10	267371	43320	35477	38829	17857	11915	9079	15702	5580	259	515	3298	744	98	443	410	57951	478	513	4571	2350	5931	11870	181	159154	12	485	11	491	563	1	28	18	104	12	27	14	2	22	18	121	9	30	19	3	1	10
MI0000425	71	dme-mir-313	128690	16124	15089	25126	27586	11753	7482	11027	10491	18	29	92	464	1	8	258	79	467	609	7	4	18	1523	435	2510	1	2	1	733	353	2	14	2	260	1	0	0	0	0	0	0	0	9	0	0	3	1
MI0000410	127	dme-mir-31b	129337	9773	22966	20703	14738	11147	16239	14680	8046	12	21	1176	296	2	157	97	7658	261	283	39	21	83	899	40	2482	0	22	1	41	45	3	17	3	12	3	15	0	1	4	0	0	0	5	4	0	2	0
MI0000367	97	dme-mir-282	342993	52313	27731	47938	43972	9913	7161	8918	65872	861	2844	4368	1960	540	512	778	660	3816	5953	10244	3123	10672	30227	2617	1709405	132687	34950	118604	46722	30236	13519	17379	3080	12373	19424	10678	9152	5187	8849	10192	1609	5108	14538	1711	392	16648	40597
MI0000379	100	dme-mir-92b	299635	73054	40550	94059	54331	8469	7951	7331	9515	28	87	37	400	9	15	247	30	519	807	94	70	280	1658	94	131892	78	356	28	5712	6303	20	19	447	1286	3	0	1	1	10	0	33	1	10	0	0	21	24254
MI0000363	100	dme-mir-279	435585	97588	49261	94194	68124	8061	7187	12308	15314	3503	6427	7348	5245	2046	1426	2007	909	2923	2728	9417	6760	24055	8606	148	4440892	6606	14454	12557	1372422	2341725	16520	25090	10090	26267	4302	1721	4783	1814	1463	1826	156	994	2407	9771	116	5760	76987
MI0000429	92	dme-mir-317	745856	58242	25479	58905	22795	6413	3564	11650	13865	15887	56449	27759	5956	9798	3920	2240	10565	3229	4829	45752	76849	279523	2129	58	1386106	24593	39136	14172	604145	257824	9118	16915	13923	41347	3936	1628	2296	2927	2830	2464	80	1063	2098	3376	125	4056	9399
MI0000419	63	dme-mir-308	118700	12024	3272	16146	11605	5977	3968	4881	13210	368	1072	652	381	308	122	182	1171	140	383	4265	7444	27375	1590	2164	830856	150248	7856	9640	26101	21506	1470	7688	1671	10611	893	471	1372	854	995	441	217	1019	581	229	734	3572	121534
MI0000423	84	dme-mir-311	170461	26461	17397	40049	46924	5876	4784	10733	13048	35	47	236	889	2	39	537	91	555	700	24	26	111	1790	107	10996	0	3	0	7253	1935	8	16	2	442	0	0	0	0	0	0	0	0	4	0	0	0	3
MI0005847	99	dme-mir-988	111513	20352	7146	30774	10337	5629	2215	3405	4046	1869	4126	4006	2242	827	597	692	570	1496	2484	953	1538	5051	490	668	468772	7940	5327	1384	59587	148889	13776	29301	15071	35252	905	242	1398	482	234	535	352	416	342	110	181	1017	1937
MI0000368	100	dme-mir-283	52117	10094	2243	10651	3343	5291	2550	6490	5737	18	43	176	89	5	25	36	412	29	60	1419	734	1982	478	212	127624	3331	2031	1038	19856	4806	46	84	926	2640	95	14	96	30	92	43	30	53	45	122	23	222	1776
MI0005827	95	dme-mir-970	105135	11524	16555	21942	14719	4738	3636	9139	4749	1030	2498	818	278	428	116	105	2823	157	228	3096	1334	4312	885	25	168510	387	5571	1293	86859	24099	1137	1278	1182	2998	2521	430	1726	840	582	870	117	399	649	3472	82	1604	1621
MI0000414	85	dme-mir-306	243070	55791	32518	50001	46275	4303	4113	4882	20967	230	681	429	434	161	94	181	118	813	1222	5653	1988	6351	5749	116	421573	6061	5433	2500	11976	5959	2485	5589	4073	12491	882	460	736	475	757	406	0	296	777	2512	28	818	75518
MI0000422	89	dme-mir-310	53124	8272	4928	9141	10432	4223	4739	4036	1422	53	106	434	1125	3	77	547	33	1267	1595	27	18	44	565	37	6206	0	9	0	1914	1000	8	24	4	1122	0	0	0	0	0	0	0	0	0	0	0	0	6
MI0005817	92	dme-mir-962	11840	3683	320	566	172	3573	408	724	234	2	3	88	3	1	8	5	974	139	324	6	7	11	153	436	249	0	2	0	0	0	0	0	0	0	20	0	8	20	2	28	0	7	0	55	9	0	5
MI0005873	59	dme-mir-1012	43257	7469	4807	7763	5081	3403	5055	2473	2418	109	225	163	85	41	30	24	938	90	103	829	260	638	1210	43	15040	451	569	298	881	625	162	199	42	91	158	9	212	56	19	14	89	86	43	50	28	174	139
MI0005845	100	dme-mir-986	132256	7698	13652	57042	6410	3207	5855	23518	2026	48	101	489	85	12	32	27	1840	9	20	1749	1628	5112	1594	102	49787	4	29	13	168	41	3	10	28	124	14	0	18	2	4	0	27	0	7	11	1	22	137
MI0000360	100	dme-mir-277	560461	7134	7060	11954	12196	3158	2189	4980	15199	13440	21796	85840	14384	4215	8812	6459	82639	247	374	87348	38180	131388	1392	77	2208451	28808	62219	14805	1162904	741822	3697	5836	1685	5220	4507	705	5989	1620	1849	1486	1439	2366	1881	5077	263	4285	3036
MI0005842	90	dme-mir-984	31097	2164	1080	7517	2133	3150	1764	6921	1036	9	12	596	7	1	74	10	1746	1241	1564	7	6	13	30	16	60427	38	193	29	4915	1683	25	40	68	94	15	0	10	79	14	0	1	8	0	157	15	12	13
MI0000428	89	dme-mir-316	84581	11683	8079	20773	14444	2978	1667	5438	8314	160	207	1761	399	61	155	176	1551	24	42	1029	975	3023	1602	40	967	2	8	7	368	365	0	2	0	14	0	4	0	0	4	0	54	0	21	0	0	0	0
MI0000129	78	dme-mir-9a	170658	4095	4790	4566	3231	2877	3979	3887	3518	1338	2935	5386	1395	496	455	523	66266	5297	5628	19845	6267	22360	1508	16	4366	5	26	8	485	594	49	174	83	374	25	31	18	1	58	57	306	0	36	3	0	1	3
MI0000418	88	dme-mir-307a	97641	4922	7679	5967	3526	2847	1746	3482	3184	2436	4756	1214	316	1302	99	136	7461	657	656	9870	8136	26159	1062	28	285711	236	5821	5716	78218	67615	930	1526	22	121	1815	779	713	745	903	631	60	249	673	1676	14	1545	616
MI0000369	100	dme-mir-284	75105	9632	8147	8709	1544	2699	2894	5227	1800	2417	8942	2133	405	1159	257	157	1484	95	131	10113	1489	5447	175	49	6923	140	504	264	3482	659	0	14	5	22	88	0	37	1	9	20	19	9	6	11	1	35	2
MI0005853	88	dme-mir-929	43699	2636	614	1093	504	2398	633	3093	712	288	845	152	32	169	18	9	19278	28	41	3755	1782	5497	92	30	38673	1681	3461	386	412	101	1	3	2	0	29	4	16	3	16	29	64	7	12	13	9	38	11
MI0005837	98	dme-mir-980	35144	1762	2646	3409	2601	2214	2775	2902	2189	78	189	267	55	22	26	40	9205	11	8	802	991	2725	197	30	1675990	13025	213561	44705	211871	36913	1524	2011	301	1154	10941	3104	8691	46849	5794	7805	185	2496	2786	97836	3401	29129	0
MI0000417	110	dme-mir-125	163067	6347	4850	9054	5012	2182	1157	2762	3542	5867	7639	12340	2251	2384	1096	861	3421	274	248	17896	17659	55046	1061	118	22858	15	31	19	660	573	10	67	3	75	16	44	8	0	20	0	667	2	10	0	0	1	131
MI0005871	71	dme-mir-1010	161990	31350	31673	48371	26378	2158	1844	2418	3213	206	469	153	43	87	27	26	502	123	170	1910	2298	7829	697	45	9277	1	15	5	1018	978	1	8	71	137	80	4	70	89	22	11	11	8	26	18	19	4	241
MI0005819	100	dme-mir-964	9662	3513	575	459	335	1526	213	230	152	11	21	374	9	0	46	10	1121	382	490	16	7	8	105	59	374	0	0	0	8	7	0	0	0	3	8	0	28	15	0	13	27	0	5	63	11	6	15
MI0005814	98	dme-mir-959	7674	1586	101	205	123	1385	127	276	62	2	13	320	10	2	27	2	2346	398	534	10	0	8	109	28	167	0	0	0	1	4	0	1	0	3	11	0	2	5	0	7	0	0	0	27	3	2	2
MI0005864	56	dme-mir-1003	13505	630	145	973	807	1285	950	885	447	443	650	578	273	111	78	74	76	315	449	1010	736	2537	53	0	34329	117	215	283	6424	1243	1486	1606	901	1357	372	98	370	76	235	189	16	132	318	5	5	238	967
MI0000426	90	dme-mir-314	34021	1942	1467	1765	1415	1075	1460	2750	941	3	3	1262	362	0	101	111	12704	299	439	153	182	488	5085	14	2023	0	3	0	803	787	0	1	2	0	10	14	21	3	29	28	44	9	19	1	0	0	0
MI0000378	100	dme-mir-100	29665	2612	1851	2243	928	817	451	749	925	106	395	601	114	30	19	42	570	18	22	3901	3256	9679	216	120	4965	0	1	3	52	49	0	2	0	5	6	0	8	2	2	0	0	0	5	0	0	2	59
MI0005806	87	dme-mir-954	5597	336	425	540	350	770	792	729	300	80	178	90	25	46	14	13	296	17	26	87	94	316	23	50	10175	259	1829	97	2625	515	11	23	61	109	18	0	20	1	2	0	0	1	1	12	3	28	20
MI0000361	98	dme-mir-278	114753	772	617	712	1130	603	311	896	1040	3362	8033	8147	1972	1320	842	898	502	1027	982	17048	17782	46532	211	14	60846	82	107	17	1170	790	47	112	1096	2356	34	6	0	19	3	13	21	0	0	5	1	1	13366
MI0005815	93	dme-mir-960	5787	1758	327	326	196	598	83	122	78	5	10	255	6	0	30	5	879	448	487	17	7	25	103	22	348	0	0	1	3	13	0	4	1	0	4	20	20	6	4	8	0	2	0	36	6	4	28
MI0005821	107	dme-mir-965	15758	1670	504	2157	2116	593	253	473	1413	133	464	205	105	74	40	59	75	133	172	2618	679	1588	233	1	146672	767	1302	3443	49832	25590	552	1532	597	1973	656	495	469	59	593	390	0	165	577	40	1	310	6546
MI0005840	91	dme-mir-983-1	14731	1596.5	474.5	7629	1915	589.5	268.5	972.5	557.5	1	1	87	0.5	0	7	1	271	95	212.5	15	2.5	10.5	23.5	0.5	37728	18.5	89	5.5	2706.5	970.5	3	0.5	4.5	13.5	14	0	8.5	2	0	0	0	0	3	5	0.5	11.5	49.5
MI0005841	99	dme-mir-983-2	14731	1596.5	474.5	7629	1915	589.5	268.5	972.5	557.5	1	1	87	0.5	0	7	1	271	95	212.5	15	2.5	10.5	23.5	0.5	37730	18.5	89	5.5	2706.5	970.5	3	0.5	4.5	13.5	14	0	8.5	2	0	0	0	0	3	5	0.5	11.5	49.5
MI0005858	93	dme-mir-252	169215	3670	1488	2387	2039	576	521	1233	872	14068	28658	22803	3512	6041	2361	1574	8201	1593	1831	19234	11227	35132	181	13	536581	7319	12039	5929	120871	47758	13264	23261	136	1173	591	114	234	344	193	199	339	224	79	1472	400	12657	12
MI0005822	87	dme-mir-966	1718	35	6	67	69	468	29	585	104	9	25	18	13	5	2	4	73	2	5	13	8	27	15	136	1963	60	17	16	23	32	15	37	39	69	22	0	4	13	3	17	25	22	0	6	26	65	1
MI0005867	64	dme-mir-1006	7291	667	76	677	136	409	216	357	338	59	133	78	30	25	19	8	60	18	23	2699	357	863	43	0	14799	27	94	48	8545	1044	58	90	97	152	106	8	34	6	36	0	0	17	66	6	0	66	341
MI0005816	89	dme-mir-961	3694	1023	182	249	113	365	82	122	101	1	3	99	1	0	11	0	1099	50	64	8	3	14	97	7	325	0	0	0	3	0	0	0	0	0	1	0	18	2	5	20	12	0	14	201	3	0	7
MI0000355	100	dme-mir-274	219011	3228	1040	1300	1274	332	141	715	593	2836	4554	2780	352	1259	241	151	5584	1	5	46162	35077	111239	144	3	2251	54	228	42	904	466	1	5	0	6	3	14	2	0	29	7	96	4	29	1	0	0	0
MI0005808	100	dme-mir-190	39012	1143	316	1388	583	316	173	424	474	298	1204	397	101	299	55	37	87	161	304	7566	5934	17710	29	13	50722	3509	878	221	19015	6036	171	1075	308	1010	24	24	299	4	44	22	4	27	26	50	4	86	1785
MI0000133	75	dme-mir-13a	30316.7	2780	1439	2336	2854	262	170	319	464	980	1308	371	39	716	28	26	1000	499	503	4431	2430	7311.67	50	0	7279	28	667	78	1242	950	25	29	57	424	77	41	30	53	35	53	1	25	36	67	0	159	86
MI0000123	69	dme-mir-5	2827	569	105	449	366	254	180	199	157	46	89	3	2	1	1	1	39	5	13	54	53	228	13	0	3068	43	132	10	104	75	14	39	9	847	30	0	9	14	1	0	32	5	19	37	2	21	9
MI0005813	91	dme-mir-375	29520	196	544	260	391	235	631	676	792	21	38	2634	375	9	204	136	19842	224	259	609	117	326	993	8	909	1	4	0	268	259	1	2	0	2	0	5	5	0	15	0	35	1	16	0	0	0	8
MI0005874	61	dme-mir-1013	2204	332	236	521	202	180	55	153	90	10	33	14	8	11	3	2	56	2	7	66	63	147	13	0	2686	1	18	8	398	73	1	7	4	21	33	0	11	2	0	4	0	2	4	8	0	96	5
MI0011289	113	dme-mir-2279	4823	728	613	1256	965	179	204	299	376	7	13	10	7	4	2	3	29	1	5	37	6	24	48	7	1498	121	115	75	151	151	8	6	9	21	0	0	0	1	0	0	13	0	0	0	0	1	11
MI0017755	158	dme-mir-4969	761	35	32	77	30	179	72	118	63	11	24	8	0	8	1	2	25	8	18	25	5	17	1	2	1270	10	20	40	8	1	7	8	11	22	5	0	2	8	0	11	20	2	0	6	9	26	0
MI0005862	100	dme-mir-1000	73554	272	25	53	26	171	35	139	61	337	1612	187	38	257	14	16	14255	432	734	15195	7645	32031	19	0	6142	7	16	10	49	34	1	1	865	2636	4	0	5	0	7	8	6	1	7	5	1	8	0
MI0000121	69	dme-mir-3	1396	98	132	148	234	157	147	102	64	89	32	13	9	3	0	1	52	1	1	25	19	51	16	2	5360	21	163	11	69	23	15	45	8	1629	18	23	5	35	20	7	16	4	13	57	2	10	0
MI0005818	89	dme-mir-963	2975	913	97	133	71	151	21	28	38	2	5	296	9	1	31	5	209	285	626	22	2	10	20	0	238	0	0	0	0	0	0	1	1	1	8	0	0	0	0	0	0	0	0	5	0	1	10
MI0017702	60	dme-mir-4919	811	311	225	22	2	144	38	3	3	0	1	8	0	0	1	2	38	0	3	6	2	2	0	0	96	1	0	0	16	3	0	0	1	0	0	0	0	0	0	0	0	0	0	0	0	1	1
MI0005866	61	dme-mir-1005	2694	562	189	547	330	127	56	116	197	11	19	7	6	14	1	2	37	2	3	104	76	187	101	0	496	0	5	3	32	3	1	0	0	0	7	0	10	0	0	0	0	9	0	0	0	7	6
MI0005875	68	dme-mir-1014	2870	799	219	657	417	105	74	218	75	0	0	58	11	0	8	3	160	2	1	7	4	5	37	10	171	0	0	0	1	0	0	0	0	0	0	0	0	0	0	0	0	0	0	0	0	0	0
MI0005839	93	dme-mir-982	3220	327	120	1203	370	100	45	184	73	3	1	103	1	1	14	0	184	226	247	4	3	5	6	0	15969	2	27	0	2366	2271	0	13	11	13	22	0	7	2	1	18	0	4	0	12	0	2	26
MI0005851	96	dme-mir-991	4169	289	712	798	902	98	115	241	257	1	0	47	0	0	3	0	428	102	120	4	0	0	34	18	444	5	8	0	114	48	0	0	0	0	0	0	0	1	0	0	0	3	8	0	0	0	1
MI0005869	57	dme-mir-1008	2823	338	92	250	160	83	79	69	157	125	379	124	43	62	19	17	15	59	74	507	29	125	17	0	7430	112	206	108	257	32	94	150	174	431	96	13	18	0	44	16	18	14	42	22	0	67	554
MI0005846	94	dme-mir-987	45567	285	630	304	133	82	280	106	165	1465	5433	367	75	392	27	50	9669	145	148	9592	5261	10938	20	0	12285	30	34	3	20	13	0	5	3	22	1818	57	645	1143	406	485	95	197	346	1726	10	4341	0
MI0017735	99	dme-mir-4949	685	70	98	107	43	72	80	99	9	3	6	11	3	1	1	1	64	1	0	3	1	7	2	3	237	2	21	5	6	0	0	1	1	16	5	0	0	0	0	0	0	0	0	3	0	11	1
MI0000431	102	dme-mir-2c	7954	564.333	353.933	598.866	323.8	65.5334	52.7334	130.533	113.067	389.933	856.601	364.533	67.7334	306.467	68.3333	41.6666	207.6	192.133	198.2	549.8	612.333	1806	89.8667	0	18387.1	221.067	814	277.8	2808.6	2969	130.067	257.134	431.6	1362.47	62.7334	78.3333	80.0666	41.1334	69.3333	58.2	0	40.5333	98.2666	471.8	3.2667	84.4666	348.933
MI0005820	91	dme-mir-932	21598	168	177	205	72	64	59	80	71	1856	4081	315	69	1091	46	29	1818	207	213	4601	1458	4853	56	9	3578	2	18	5	250	122	5	5	118	326	6	0	0	13	0	9	0	4	5	1	0	1	32
MI0000383	90	dme-mir-263b	47381	273	135	92	105	58	165	124	36	485	1716	364	147	234	80	87	32808	17	24	5068	1364	3983	16	0	264	1	8	3	2	8	1	2	2	5	0	0	0	0	19	12	18	1	0	0	0	0	0
MI0017700	77	dme-mir-4917	518	77	43	111	70	53	87	43	22	0	0	0	0	0	0	0	0	0	0	0	0	0	2	10	0	0	0	0	0	0	0	0	0	0	0	0	0	0	0	0	0	0	0	0	0	0	0
MI0011578	95	dme-mir-2489	369	40	14	58	25	44	12	43	24	1	10	3	0	0	0	1	25	0	1	37	7	20	4	0	2991	13	39	5	121	12	0	5	6	5	20	0	4	7	0	0	0	1	0	5	0	112	6
MI0005838	97	dme-mir-981	58199	184	24	6	8	43	6	5	2	5548	12365	589	105	3446	53	84	464	1445	1807	6551	6636	18827	1	0	6640	1	8	7	226	179	1	3	952	3048	0	0	0	0	0	0	0	0	0	0	0	0	8
MI0017736	92	dme-mir-4950	730	120	222	223	13	43	40	53	7	0	0	1	0	0	0	0	5	0	2	0	0	0	1	0	356	3	19	0	53	23	0	0	1	0	7	0	0	4	0	0	0	2	0	91	3	7	0
MI0005877	58	dme-mir-1016	256	3	5	5	8	43	58	11	17	2	5	0	0	2	1	0	3	0	1	13	16	58	0	5	382	24	19	12	61	39	1	3	0	6	10	0	3	2	1	2	0	3	1	10	4	13	0
MI0005810	148	dme-mir-956	13184	166	82	235	256	41	117	211	223	4	3	2390	783	2	320	267	4307	35	48	275	116	408	2887	8	4186	0	0	3	1916	1897	0	1	1	11	0	10	10	0	4	0	0	0	2	0	0	0	2
MI0000376	100	dme-mir-210	416717	25	15	12	14	38	148	143	12	7880	23790	841	233	3788	61	131	44549	69	101	43159	59346	232359	1	2	1357	2	4	0	40	28	1	10	1	24	4	27	9	0	34	34	138	7	68	0	0	0	13
MI0017747	133	dme-mir-4961	299	33	17	57	35	36	10	39	23	1	1	2	0	1	0	0	25	0	2	6	3	6	2	0	302	2	10	8	19	6	0	4	1	4	0	0	0	1	5	0	0	0	0	3	0	15	0
MI0005852	92	dme-mir-992	2935	24	12	35	47	35	19	27	61	1	7	355	4	0	55	3	110	718	1405	1	1	10	2	3	289	0	0	0	29	3	2	1	4	10	0	0	0	0	0	0	0	1	0	0	0	0	6
MI0005849	91	dme-mir-137	5950	50	25	37	35	34	16	62	26	104	149	152	28	49	12	8	1376	41	49	2031	434	1211	21	0	1125	4	34	1	78	24	0	2	2	4	2	0	0	0	4	4	0	0	2	1	0	1	1
MI0017737	150	dme-mir-4951	473	38	38	62	27	34	37	49	15	5	26	19	5	5	1	1	13	5	2	19	17	51	3	1	188	3	0	1	19	4	1	1	2	0	4	0	0	1	8	0	0	3	0	7	5	1	1
MI0005805	68	dme-mir-iab-8	981	80	133	92	67	33	42	60	58	0	0	49	3	0	6	2	300	4	5	6	8	16	17	0	553	0	0	0	6	1	0	0	0	0	0	0	0	0	0	0	0	0	0	0	0	0	0
MI0011590	71	dme-mir-2501	88	6	8	0	3	33	22	0	7	0	0	3	0	0	0	1	0	0	1	1	0	3	0	0	219	1	6	1	9	38	2	1	1	0	2	0	12	2	0	0	0	0	0	4	1	2	7
MI0017695	58	dme-mir-4913	214	26	18	56	9	32	5	17	3	0	2	0	1	0	0	1	12	1	0	6	8	17	0	0	73	0	0	0	1	0	1	0	0	0	0	0	0	0	0	8	0	0	0	1	0	4	0
MI0005831	101	dme-mir-974	1026	74	6	20	6	31	2	10	0	1	0	20	0	0	2	0	775	27	43	3	0	2	4	0	53	0	2	7	0	0	0	0	2	0	0	0	0	0	0	0	0	0	0	0	0	0	0
MI0005870	61	dme-mir-1009	2099	49	14	80	60	31	20	23	44	46	86	26	16	19	3	4	17	13	25	858	244	420	1	0	414	0	3	4	126	14	4	1	6	8	0	0	0	0	0	0	0	0	1	1	0	0	20
MI0005807	97	dme-mir-955	480	37	66	51	17	29	52	46	25	11	21	44	3	0	3	4	38	1	0	9	2	2	9	10	110	0	4	6	0	0	0	0	0	0	0	0	0	0	0	0	0	0	0	1	0	1	0
MI0017771	101	dme-mir-4985	221	48	48	29	15	28	13	14	10	1	2	1	0	0	0	0	4	0	0	3	1	3	1	0	1	0	0	0	0	0	0	0	0	0	0	0	0	0	0	0	0	0	0	0	0	0	0
MI0005809	108	dme-mir-193	18616	43	11	40	24	26	12	38	24	2320	5410	51	31	1608	12	26	670	1	6	3533	1319	3409	2	0	784	10	21	1	50	77	3	2	64	212	0	0	0	0	0	0	0	2	0	3	0	2	18
MI0011583	117	dme-mir-2494	519	42	5	19	3	25	4	33	9	2	1	149	84	0	8	23	100	0	0	5	2	4	1	0	28	3	2	1	1	3	0	0	0	0	0	0	0	0	0	0	0	0	0	0	0	0	0
MI0017754	155	dme-mir-4968	444	23	44	57	48	25	31	44	45	0	4	5	2	0	3	0	52	0	2	10	10	31	5	3	1047	27	122	35	55	9	5	14	2	1	28	0	9	6	13	0	0	3	4	82	5	106	10
MI0005812	92	dme-mir-958	20349	126	43	16	81	24	30	113	22	27	54	7819	2917	5	1452	1050	1702	1429	1838	544	93	230	734	0	5923	1	2	1	1478	1440	1	43	19	49	0	0	0	0	0	0	0	0	4	0	0	0	3
MI0016041	69	dme-mir-3641	79	4	6	3	3	24	8	12	5	1	1	5	1	0	0	1	5	0	0	0	0	0	0	0	133	2	1	0	12	0	1	0	0	0	0	0	0	0	0	0	0	0	0	0	0	3	0
MI0000421	69	dme-mir-309	735	87	70	205	164	22	34	28	9	58	26	0	5	1	0	1	3	0	0	9	4	9	0	0	2555	1	25	0	2	3	4	20	3	1053	2	0	0	0	4	0	28	0	3	1	0	0	1
MI0000362	98	dme-mir-133	99356	90	17	10	13	19	34	74	56	3808	7505	2249	430	2343	278	192	17572	222	322	12085	11743	40285	8	1	1340	1	2	0	86	88	5	20	3	21	7	15	11	2	29	17	39	8	11	0	0	1	23
MI0017692	66	dme-mir-4910	60	1	3	10	1	19	3	3	5	0	1	0	0	0	0	0	2	0	1	4	0	1	3	3	490	10	1	1	0	0	1	0	0	0	0	0	0	0	0	0	7	2	0	0	1	3	4
MI0017728	110	dme-mir-4942	272	36	47	71	35	18	14	24	18	0	0	0	0	0	0	0	2	0	0	0	2	5	0	0	57	0	2	0	4	7	0	0	0	0	0	0	0	0	2	0	0	0	0	2	0	2	1
MI0000380	100	dme-mir-286	1768	272	228	329	322	17	27	32	23	118	117	10	10	5	1	9	8	8	4	28	45	146	9	0	8114	21	65	14	301	178	43	94	14	2589	15	5	6	6	25	0	11	4	12	12	0	12	6
MI0017762	103	dme-mir-4976	379	47	37	45	19	17	21	20	23	1	6	39	1	0	1	0	3	0	5	2	26	62	4	0	335	0	10	0	4	3	2	4	0	0	0	0	0	2	0	0	0	0	0	8	0	0	18
MI0017743	84	dme-mir-4957	137	9	8	22	18	17	11	23	16	0	1	0	1	0	0	0	1	0	0	2	2	1	2	3	99	0	1	1	2	0	0	0	0	1	7	0	0	0	0	0	0	1	0	1	1	3	2
MI0000122	81	dme-mir-4	767	206	68	145	104	16	12	10	30	41	29	4	2	2	0	1	3	1	2	28	17	42	4	0	2218	3	40	2	60	19	6	18	2	753	0	0	0	2	0	0	5	0	5	0	0	10	7
MI0017699	71	dme-mir-2535b	1106	112	55	160	47	16	24	30	18	9	36	12	2	9	1	0	7	3	7	119	91	345	3	0	7275	17	170	22	4452	1612	7	25	2	7	10	8	2	1	7	5	0	4	4	4	0	11	64
MI0017770	123	dme-mir-4984	258	54	48	73	16	16	12	19	7	0	0	0	0	1	0	0	5	0	0	3	0	3	1	0	124	1	13	9	25	5	0	0	0	0	11	0	6	1	0	0	0	4	0	0	0	11	0
MI0017740	91	dme-mir-4954	109	15	8	44	3	16	6	17	0	0	0	0	0	0	0	0	0	0	0	0	0	0	0	0	34	1	5	0	1	1	0	0	0	0	0	0	0	0	0	0	0	0	0	0	0	2	0
MI0000427	84	dme-mir-315	11255	140	15	9	7	14	6	8	11	125	250	13	1	44	1	3	1044	554	503	2695	1915	3871	26	0	3097	4	47	9	226	94	0	2	0	5	14	0	7	0	0	0	27	1	0	1	0	6	21
MI0005835	92	dme-mir-978	1084	25	3	13	2	13	3	4	1	2	3	240	3	1	16	0	122	293	320	3	1	12	4	0	194	1	0	33	7	14	1	5	4	16	0	0	0	0	0	0	0	0	0	0	0	0	1
MI0005823	97	dme-mir-967	110	14	12	13	2	12	5	17	2	1	7	1	0	0	0	0	9	1	1	3	0	9	1	0	541	3	5	14	41	27	10	11	7	23	29	15	11	26	11	7	0	17	4	1	4	21	0
MI0017729	117	dme-mir-4943	407	48	65	108	70	11	31	20	40	2	1	3	0	0	0	0	3	0	0	0	2	3	0	0	883	4	54	19	253	46	0	5	4	24	4	0	0	0	0	0	0	0	0	11	0	49	0
MI0005868	65	dme-mir-1007	708	32	3	10	15	10	9	13	18	13	20	22	6	2	2	2	16	2	4	202	88	207	12	0	1810	30	39	34	808	137	13	21	5	5	10	0	0	1	0	0	0	1	0	8	2	20	40
MI0000409	70	dme-mir-303	1074	15	7	52	37	10	4	35	15	2	4	102	1	1	20	1	10	327	403	7	5	16	0	0	952	2	0	0	21	4	7	6	8	21	1	0	0	0	0	0	0	0	0	0	0	1	20
MI0005850	86	dme-mir-990	1552	74	4	47	11	9	2	7	2	46	107	12	0	30	1	4	79	7	6	186	177	741	0	0	4	0	0	0	0	0	0	0	0	0	0	0	0	0	0	0	0	0	0	0	0	0	0
MI0017766	122	dme-mir-4980	76	18	18	7	9	9	4	5	1	0	0	0	0	0	0	0	1	0	0	3	0	1	0	0	37	1	3	1	20	1	0	0	0	3	0	0	0	0	0	0	0	0	0	0	0	0	0
MI0017769	108	dme-mir-4983	118	9	25	30	6	9	14	12	3	0	1	3	0	0	0	0	4	0	0	0	0	0	2	0	7	0	0	0	0	0	0	0	0	0	0	0	0	0	0	0	0	0	0	0	0	0	0
MI0005830	101	dme-mir-973	652	7	0	0	0	9	0	1	1	1	3	130	0	0	12	0	107	171	200	1	3	4	2	0	68	0	0	11	0	0	0	2	8	8	0	0	0	0	0	0	0	0	0	0	0	0	0
MI0017693	68	dme-mir-4911	114	4	0	17	65	9	0	6	13	0	0	0	0	0	0	0	0	0	0	0	0	0	0	0	5	0	0	0	0	1	0	0	0	0	0	0	0	0	0	0	0	0	0	0	0	0	0
MI0005834	99	dme-mir-977	5717	31	7	9	8	8	0	0	4	9	22	1680	20	2	263	6	310	1173	2134	9	2	9	11	0	963	2	1	128	7	1	1	6	44	100	0	0	0	0	0	0	0	0	0	1	0	0	1
MI0005833	97	dme-mir-976	631	29	1	8	3	8	3	2	2	1	3	66	0	0	6	0	278	82	80	9	5	27	18	0	136	0	0	30	0	0	0	0	1	0	0	0	0	0	0	0	0	0	0	0	0	0	0
MI0017751	87	dme-mir-4965	53	14	4	6	3	8	0	10	1	0	2	0	0	0	0	0	2	0	0	0	1	2	0	0	28	0	0	0	3	2	0	0	0	0	0	0	0	0	0	0	0	0	0	0	0	1	1
MI0005863	90	dme-mir-1001	3285	6	10	16	9	8	8	13	6	210	441	108	22	138	16	9	204	7	27	655	417	955	0	0	52	0	0	0	0	0	0	0	0	2	0	0	0	0	0	0	0	0	0	0	0	0	0
MI0017748	124	dme-mir-4962	39	1	5	4	0	8	3	6	1	0	2	0	0	0	0	0	2	0	1	4	0	2	0	0	150	5	10	5	4	4	0	0	0	1	8	0	0	0	0	0	0	1	0	2	0	21	0
MI0000373	100	dme-mir-124	227018	135	7	28	27	7	25	18	26	20922	79034	9909	1562	13711	1057	796	6302	22761	27237	13298	7616	22535	2	3	4196	2	3	1	87	114	8	133	63	233	0	8	17	1	34	20	21	3	20	1	0	0	1
MI0005826	94	dme-mir-969	603	5	12	4	4	7	7	3	4	45	88	15	2	23	1	0	27	0	0	126	47	183	0	0	65	0	0	0	22	1	0	0	0	0	0	0	0	0	0	0	0	0	0	0	0	0	0
MI0017756	103	dme-mir-4970	23	0	2	0	0	7	0	8	5	0	0	0	0	0	0	0	0	0	0	0	0	1	0	0	101	3	67	0	10	4	0	0	0	1	0	0	0	0	0	0	0	0	0	0	0	2	0
MI0000126	80	dme-mir-6-3	277	55.6666	39.6667	40.6666	59.6666	6.3334	28.3333	13.3333	27.3334	0	4	0	0	0	0	0	0	0	0	2	0	0	0	0	2567.33	0.3333	9.6667	1	32.6666	9.3334	2	12	1	1082	0	0	0	0	0	0	0	0	0	0	0	0	0
MI0017742	117	dme-mir-4956	31	1	0	2	0	6	3	2	7	0	1	1	0	0	0	0	0	0	1	0	1	2	1	3	38	2	0	0	1	1	0	0	0	2	0	0	3	0	0	0	0	0	0	0	0	2	2
MI0000124	82	dme-mir-6-1	275	55.1666	40.6667	39.6666	60.6666	5.3334	25.3333	15.8333	29.3334	1	1	1	0	0	0	0	0	0	0	0	0	0	0	0	1234.33	0.3333	8.1667	0	31.6666	9.8334	7	8	1	502	0	0	0	0	0	0	0	0	0	0	0	0	0
MI0000125	74	dme-mir-6-2	281	55.1666	38.6667	39.6666	59.6666	5.3334	25.3333	13.8333	29.3334	6	4	0	1	0	0	0	0	0	0	2	0	1	0	0	1347.33	0.3333	8.1667	0	31.6666	9.8334	1	14	1	590	0	0	0	0	0	0	0	0	0	0	0	0	0
MI0011585	118	dme-mir-2496	53	3	2	9	12	5	8	5	3	0	1	1	0	0	0	0	1	0	0	0	1	2	0	0	17	1	0	0	0	0	1	0	1	4	0	0	0	1	0	0	0	0	0	1	0	0	0
MI0017694	60	dme-mir-4912	19	1	0	2	2	5	5	2	2	0	0	0	0	0	0	0	0	0	0	0	0	0	0	0	11	0	0	0	0	0	0	0	0	0	0	0	0	0	0	0	0	0	0	0	0	0	0
MI0005876	64	dme-mir-1015	331	13	6	1	2	4	0	5	3	2	2	162	47	0	18	21	37	0	2	1	0	1	4	0	70	0	1	0	12	1	0	0	0	0	0	0	0	0	0	0	0	0	0	0	0	1	3
MI0017753	107	dme-mir-4967	90	9	11	14	19	4	8	14	6	0	0	1	0	0	0	0	3	0	0	1	0	0	0	0	32	0	6	2	6	2	0	0	0	0	0	0	0	0	0	0	0	0	0	4	0	3	0
MI0005811	96	dme-mir-957	28817	9	2	2	3	4	19	32	4	393	1111	316	59	219	18	25	8144	29	37	4076	4491	9823	1	0	381	1	2	0	129	66	0	0	0	0	0	0	2	0	3	0	36	0	18	0	0	0	0
MI0011587	112	dme-mir-2498	146	5	1	3	9	4	5	3	11	0	1	16	0	0	1	0	8	30	42	1	2	1	3	0	94	0	0	1	19	1	0	0	0	0	0	0	0	0	0	0	0	0	0	0	0	0	0
MI0017697	118	dme-mir-4915	18	4	0	1	1	4	0	1	5	0	0	1	0	0	0	0	0	0	0	0	0	1	0	0	27	0	0	0	0	0	0	0	0	0	0	0	0	0	0	0	0	0	0	0	0	0	0
MI0017763	105	dme-mir-4977	64	3	13	8	4	4	2	11	5	0	0	1	3	0	0	1	2	1	1	1	3	1	0	0	43	4	2	0	2	0	0	1	0	0	2	0	0	1	0	0	0	0	0	2	0	3	3
MI0011581	76	dme-mir-2492	25	2	1	0	4	4	1	6	7	0	0	0	0	0	0	0	0	0	0	0	0	0	0	0	11	1	1	1	2	0	0	1	0	0	0	0	0	1	0	0	0	0	0	0	0	0	0
MI0017773	132	dme-mir-4987	42	2	13	3	1	4	10	3	0	0	0	0	0	0	0	0	2	1	1	1	0	1	0	0	67	2	24	2	10	3	0	0	0	0	2	0	0	0	0	3	0	0	0	0	0	5	0
MI0017696	94	dme-mir-4914	26	1	0	1	0	4	7	6	1	1	0	1	0	1	0	0	0	0	0	0	0	3	0	0	19	0	0	0	0	1	0	1	0	2	0	0	0	0	0	0	0	0	0	0	0	0	2
MI0017758	107	dme-mir-4972	24	1	1	6	0	4	0	6	0	0	0	1	0	0	0	0	1	0	0	0	2	1	1	0	3	0	0	0	0	1	0	0	1	0	0	0	0	0	0	0	0	0	0	0	0	0	0
MI0005854	119	dme-mir-993	10896	29	0	8	5	3	4	9	3	377	890	2320	215	132	215	105	671	391	595	1358	870	2696	0	0	1150	1	2	0	50	55	0	9	1	0	0	0	0	0	0	0	0	0	0	0	0	0	0
MI0011293	76	dme-mir-2283	85	19	8	30	2	3	8	12	0	0	0	0	0	0	0	0	0	0	0	1	0	2	0	0	95	2	3	4	6	5	0	0	0	0	0	0	5	0	0	0	0	4	0	0	0	10	0
MI0011586	96	dme-mir-2497	78	6	2	0	6	3	4	0	8	1	3	0	1	0	0	1	2	0	0	19	5	17	0	0	366	0	5	7	11	0	3	13	19	58	1	0	8	0	2	0	0	0	5	0	0	7	6
MI0011588	96	dme-mir-2499	103	3	3	0	1	3	0	0	0	0	1	8	1	0	1	0	5	19	54	0	1	2	1	0	29	0	0	5	1	0	0	0	1	0	0	0	0	0	0	0	0	0	0	0	0	0	0
MI0005836	95	dme-mir-979	123	2	0	0	1	3	0	0	1	0	0	16	0	0	2	0	59	14	19	0	3	3	0	0	33	0	0	11	2	0	0	0	0	0	0	0	0	0	0	0	0	0	0	0	0	0	0
MI0005878	71	dme-mir-1017	4726	1	0	1	0	3	441	2	0	425	661	64	8	323	15	4	56	47	67	540	539	1529	0	0	89	0	0	0	2	3	0	3	0	6	2	0	9	0	7	0	0	0	0	0	0	0	0
MI0016042	76	dme-mir-3642	24	1	2	0	1	3	3	7	3	0	0	1	0	0	0	0	1	0	0	0	0	2	0	0	35	0	1	1	5	0	0	4	1	0	0	0	0	0	0	0	0	0	0	0	0	1	0
MI0017760	102	dme-mir-4974	20	1	1	1	1	3	1	2	6	0	1	1	0	0	0	0	0	0	0	1	0	1	0	0	40	0	1	1	21	5	0	0	0	0	0	0	0	0	0	0	0	0	0	1	0	1	2
MI0017746	101	dme-mir-4960	43	4	0	0	1	2	1	1	0	1	6	0	0	3	0	0	9	0	2	2	5	6	0	0	57	0	0	0	3	1	1	0	0	0	0	0	0	0	0	0	0	0	0	0	0	0	1
MI0017738	126	dme-mir-4952	92	2	9	3	5	2	1	7	2	1	9	2	0	0	0	0	5	1	0	6	10	24	0	3	75	0	2	0	9	6	0	0	4	12	1	0	0	2	2	0	0	0	0	0	0	0	0
MI0017757	111	dme-mir-4971	19	1	4	3	0	2	2	3	1	1	0	1	0	1	0	0	0	0	0	0	0	0	0	0	22	3	1	0	0	2	0	0	1	0	0	0	0	0	0	0	0	0	0	0	0	0	1
MI0000432	68	dme-mir-iab-4	596	19	16	43	22	1	2	3	27	6	6	128	24	5	20	11	3	78	94	24	18	43	3	0	71	0	0	0	10	7	0	1	1	11	0	0	0	0	0	0	0	0	0	0	0	0	2
MI0011589	68	dme-mir-2500	44	7	0	6	0	1	2	3	1	4	10	3	2	1	2	0	0	2	0	0	0	0	0	0	244	2	7	1	28	6	3	7	3	26	2	0	8	2	6	0	0	2	5	10	1	12	12
MI0005825	92	dme-mir-968	192	5	1	2	97	1	0	5	25	4	18	0	1	1	0	0	10	0	0	9	8	5	0	0	142	1	5	0	8	4	0	0	0	6	0	0	0	0	0	0	0	0	0	3	0	0	0
MI0016045	137	dme-mir-3645	31	1	3	3	4	1	4	0	2	0	3	0	0	0	1	0	3	0	0	2	0	4	0	0	76	1	0	0	1	1	1	4	0	0	0	0	0	0	2	0	0	5	0	1	0	4	0
MI0005832	91	dme-mir-975	746	1	0	0	0	1	1	1	0	2	4	191	0	0	26	1	7	252	252	1	1	4	1	0	112	0	0	4	0	0	0	0	3	20	0	0	0	0	0	0	0	0	0	0	0	0	0
MI0017704	60	dme-mir-4909	18	0	8	0	2	1	1	2	3	0	0	0	1	0	0	0	0	0	0	0	0	0	0	0	1	0	0	0	0	0	0	0	0	0	0	0	0	0	0	0	0	0	0	0	0	0	0
MI0017733	100	dme-mir-4947	18	0	0	2	0	1	0	3	0	0	2	1	0	0	0	0	1	0	0	2	1	3	0	2	3	0	0	0	0	2	0	0	0	0	0	0	0	0	0	0	0	0	0	0	0	0	0
MI0017739	93	dme-mir-4953	2	0	0	0	0	1	0	0	0	0	0	0	0	0	0	0	0	0	0	0	0	1	0	0	26	1	6	2	8	6	0	0	1	0	0	0	0	0	0	0	0	0	0	0	0	1	0
MI0005829	91	dme-mir-972	269	0	0	1	0	1	0	0	0	0	1	92	1	0	6	0	15	81	57	3	1	10	0	0	42	0	0	6	0	0	0	2	0	7	0	0	0	0	0	0	0	0	0	0	0	0	1
MI0017752	127	dme-mir-4966	426	10	0	1	3	0	0	0	1	0	0	122	0	0	11	0	28	112	121	2	1	6	8	0	87	0	0	15	4	6	0	0	5	5	0	0	0	0	0	0	0	0	0	0	0	0	0
MI0005843	92	dme-mir-927	18304	5	3	0	0	0	0	3	3	918	2306	140	38	667	23	19	297	65	114	3959	2731	7013	0	0	2858	3	0	0	21	77	0	0	1	23	0	0	5	0	0	5	19	0	0	0	0	0	27
MI0005865	68	dme-mir-1004	2055	4	0	0	0	0	0	5	1	213	420	77	14	123	18	5	95	16	45	208	193	618	0	0	41	0	0	1	2	3	0	0	0	0	0	0	0	0	0	0	0	0	0	0	0	0	0
MI0000358	100	dme-mir-219	11471	4	1	0	1	0	0	1	0	679	1872	234	51	518	56	21	40	32	57	2560	1359	3985	0	0	137	1	1	0	9	8	0	4	0	0	0	0	0	0	0	0	0	0	0	0	0	0	2
MI0017750	112	dme-mir-4964	24	4	1	4	2	0	1	0	2	0	0	1	1	0	0	0	0	0	0	3	1	4	0	0	18	3	0	0	4	1	0	0	0	0	0	0	0	1	0	0	0	0	0	1	0	1	3
MI0017749	109	dme-mir-4963	68	3	14	20	13	0	4	8	4	0	0	0	0	0	0	0	0	0	0	1	1	0	0	0	57	1	0	0	0	0	0	0	0	0	0	0	0	0	0	0	0	0	0	0	0	0	3
MI0011579	75	dme-mir-2490	7	2	0	0	2	0	0	0	0	0	0	0	0	0	0	0	0	1	0	0	0	0	0	2	19	0	1	1	4	0	0	0	0	1	0	0	0	0	0	0	0	0	0	0	0	0	0
MI0017731	115	dme-mir-4945	23	2	2	1	0	0	2	0	3	0	0	0	0	0	0	0	2	0	0	2	3	6	0	0	0	0	0	0	0	0	0	0	0	0	0	0	0	0	0	0	0	0	0	0	0	0	0
MI0017745	118	dme-mir-4959	13	2	1	2	2	0	0	1	2	0	1	0	0	0	0	0	0	0	2	0	0	0	0	0	143	0	0	0	0	0	20	27	0	0	0	0	0	0	0	0	0	0	0	0	1	0	0
MI0017761	111	dme-mir-4975	32	2	1	0	0	0	0	3	1	0	0	2	0	1	1	0	3	0	0	3	4	10	0	1	8	0	0	0	0	0	0	0	0	0	0	0	0	0	0	0	0	0	0	0	0	0	1
MI0005872	54	dme-mir-1011	31	1	0	0	0	0	0	0	0	2	0	0	0	0	0	0	7	1	0	6	4	10	0	0	3	0	0	0	0	0	0	0	0	0	0	0	0	0	0	0	0	0	0	0	0	0	0
MI0011580	144	dme-mir-2491	11	1	1	2	0	0	1	0	0	0	1	0	0	0	0	0	0	0	0	2	0	0	0	3	108	5	0	17	0	0	1	1	3	19	0	0	0	0	3	0	0	0	0	0	1	1	0
MI0011577	120	dme-mir-307b	55	1	1	2	0	0	0	2	1	8	3	11	1	0	0	2	8	0	0	1	5	9	0	0	101	0	2	0	1	0	1	1	0	3	7	0	9	0	0	0	0	0	0	6	0	0	0
MI0016043	68	dme-mir-3643	8	1	0	0	1	0	0	0	2	0	0	0	0	0	0	2	0	0	1	0	1	0	0	0	32	0	0	0	5	0	0	2	0	0	0	0	0	0	0	0	0	0	0	0	0	0	0
MI0017734	106	dme-mir-4948	25	1	1	11	10	0	0	1	0	0	0	0	0	0	0	0	0	0	0	0	0	1	0	0	112	1	8	2	20	25	1	5	0	0	0	0	0	2	0	0	0	3	0	0	0	3	5
MI0017764	147	dme-mir-4978	4	1	0	0	0	0	0	0	0	0	0	0	0	0	0	0	0	0	0	0	0	3	0	0	12	5	0	0	1	4	0	0	0	0	0	0	0	0	0	0	0	0	0	1	0	0	0
MI0005824	89	dme-mir-1002	20	0	0	0	0	0	0	0	0	3	6	0	0	0	0	1	2	0	0	0	5	3	0	0	17	0	1	0	1	0	0	0	0	5	0	0	0	0	0	0	0	0	0	0	0	0	0
MI0011290	115	dme-mir-2280	4	0	0	0	0	0	1	0	0	0	0	0	0	0	0	0	0	1	2	0	0	0	0	0	16	0	0	0	0	0	0	0	0	0	0	0	0	0	0	0	0	0	0	0	0	0	7
MI0011291	103	dme-mir-2281	1	0	0	0	0	0	0	0	0	0	0	0	0	0	0	0	0	0	0	0	0	0	1	0	21	0	0	0	0	0	0	0	0	1	0	0	0	0	0	0	0	0	0	0	0	0	3
MI0011292	107	dme-mir-2282	3	0	0	0	1	0	0	0	0	1	0	0	0	0	0	0	0	0	0	0	0	1	0	0	105	3	6	1	26	16	1	4	3	5	0	0	0	0	0	0	0	0	0	0	0	0	1
MI0011582	106	dme-mir-2493	26	0	2	0	0	0	3	0	0	0	5	3	0	0	0	0	0	0	0	3	3	7	0	0	167	7	6	4	58	7	9	13	5	5	0	0	9	0	0	2	0	0	0	0	0	10	0
MI0011584	115	dme-mir-2495	4	0	0	0	0	0	0	0	0	2	1	1	0	0	0	0	0	0	0	0	0	0	0	0	2	0	0	0	0	0	0	0	0	0	0	0	0	0	0	0	0	0	0	0	0	0	0
MI0000365	95	dme-mir-280	0	0	0	0	0	0	0	0	0	0	0	0	0	0	0	0	0	0	0	0	0	0	0	0	0	0	0	0	0	0	0	0	0	0	0	0	0	0	0	0	0	0	0	0	0	0	0
MI0000377	99	dme-mir-285	65420	0	0	0	1	0	1	5	8	15381	22071	323	167	5720	64	100	2415	9	34	4768	3754	10597	2	0	907	0	1	0	2	5	0	15	0	83	0	0	0	0	5	13	5	1	5	0	0	0	56
MI0000381	93	dme-mir-287	1	0	0	0	0	0	0	0	0	0	0	0	0	1	0	0	0	0	0	0	0	0	0	0	3	0	0	0	0	0	0	0	0	2	0	0	0	0	0	0	0	0	0	0	0	0	0
MI0000384	97	dme-mir-288	2	0	0	0	0	0	0	0	0	0	1	0	0	1	0	0	0	0	0	0	0	0	0	0	0	0	0	0	0	0	0	0	0	0	0	0	0	0	0	0	0	0	0	0	0	0	0
MI0000385	99	dme-mir-289	0	0	0	0	0	0	0	0	0	0	0	0	0	0	0	0	0	0	0	0	0	0	0	0	0	0	0	0	0	0	0	0	0	0	0	0	0	0	0	0	0	0	0	0	0	0	0
MI0016044	61	dme-mir-3644	3	0	0	0	0	0	0	1	0	0	0	0	0	0	0	0	0	0	0	1	0	1	0	0	27	0	0	0	1	0	0	0	0	0	0	0	0	0	0	0	0	0	0	0	0	0	2
MI0017703	59	dme-mir-4908	1	0	0	0	0	0	0	0	0	0	0	0	0	0	0	0	1	0	0	0	0	0	0	0	1	0	0	0	0	0	0	0	0	0	0	0	0	0	0	0	0	0	0	0	0	0	0
MI0017698	59	dme-mir-4916	6	0	0	0	0	0	0	1	0	0	0	0	0	0	0	0	1	0	0	2	1	1	0	0	10	0	0	0	7	0	0	0	0	0	0	0	0	0	0	0	0	0	0	0	0	0	0
MI0017701	55	dme-mir-4918	7	0	0	0	0	0	1	0	2	1	1	0	0	0	0	0	0	1	0	1	0	0	0	0	38	0	0	0	6	0	3	6	1	3	0	0	0	0	0	0	0	0	0	0	0	0	0
MI0017725	109	dme-mir-4939	14	0	0	0	0	0	0	0	0	0	0	2	0	0	0	0	10	0	0	0	0	2	0	0	0	0	0	0	0	0	0	0	0	0	0	0	0	0	0	0	0	0	0	0	0	0	0
MI0017726	105	dme-mir-4940	22	0	0	0	0	0	0	0	0	0	2	2	0	0	0	0	4	3	0	3	1	7	0	0	6	0	0	0	0	0	0	0	0	0	0	0	0	0	0	0	0	0	0	0	0	0	0
MI0017727	103	dme-mir-4941	1	0	0	0	0	0	0	0	0	0	1	0	0	0	0	0	0	0	0	0	0	0	0	0	60	5	4	0	8	17	4	1	0	0	0	0	0	1	0	0	0	3	0	7	0	1	0
MI0017730	129	dme-mir-4944	2	0	0	0	0	0	0	0	0	0	0	0	0	0	0	0	0	0	0	0	0	2	0	0	0	0	0	0	0	0	0	0	0	0	0	0	0	0	0	0	0	0	0	0	0	0	0
MI0017732	116	dme-mir-4946	0	0	0	0	0	0	0	0	0	0	0	0	0	0	0	0	0	0	0	0	0	0	0	0	0	0	0	0	0	0	0	0	0	0	0	0	0	0	0	0	0	0	0	0	0	0	0
MI0017741	169	dme-mir-4955	24	0	1	1	2	0	0	0	0	1	3	9	1	1	0	1	0	3	1	0	0	0	0	0	197	0	0	0	0	0	1	2	16	33	0	0	0	0	0	0	0	0	0	0	0	0	5
MI0017744	134	dme-mir-4958	21	0	0	1	0	0	0	0	0	0	4	1	0	0	0	2	2	1	3	1	2	3	1	0	11	2	1	1	2	1	0	0	0	0	0	0	0	0	0	0	0	0	0	0	1	0	0
MI0017759	151	dme-mir-4973	24	0	0	0	0	0	0	0	0	0	4	0	0	3	0	0	0	0	0	2	3	12	0	0	0	0	0	0	0	0	0	0	0	0	0	0	0	0	0	0	0	0	0	0	0	0	0
MI0017765	109	dme-mir-4979	6	0	0	0	0	0	0	0	0	0	2	0	0	1	0	0	0	0	0	1	0	2	0	0	7	0	0	0	0	0	0	1	0	0	0	0	0	0	0	0	0	0	0	0	0	0	0
MI0017767	95	dme-mir-4981	30	0	0	0	0	0	1	3	1	0	0	4	0	1	0	0	9	0	0	1	1	9	0	0	1	0	0	0	0	0	0	0	0	0	0	0	0	0	0	0	0	0	0	0	0	0	0
MI0017768	119	dme-mir-4982	8	0	0	0	0	0	0	0	0	1	1	0	0	0	0	0	4	0	0	1	1	0	0	0	0	0	0	0	0	0	0	0	0	0	0	0	0	0	0	0	0	0	0	0	0	0	0
MI0017772	122	dme-mir-4986	8	0	1	0	0	0	0	0	3	0	1	1	0	0	0	0	0	0	0	2	0	0	0	0	0	0	0	0	0	0	0	0	0	0	0	0	0	0	0	0	0	0	0	0	0	0	0
MI0005828	96	dme-mir-971	1162	0	0	0	1	0	0	0	1	73	97	17	6	26	6	1	6	54	42	212	141	479	0	0	222	3	0	0	30	18	0	1	35	46	0	0	0	0	0	0	0	0	0	0	0	0	0
MI0005844	86	dme-mir-985	553	0	0	0	1	0	0	0	0	0	0	128	0	0	17	0	115	123	161	0	0	0	8	0	31	0	0	0	0	0	0	0	0	0	0	0	0	0	0	0	0	0	0	0	0	0	0
MI0005859	215	dme-mir-997	533	0	0	0	1	0	0	0	0	0	2	160	1	0	22	1	15	125	193	3	1	2	7	0	33	0	0	0	0	0	0	0	0	0	0	0	0	0	0	0	0	0	0	0	0	0	0
[truncated: 40 more columns]

## Sheet: 2-normalized
MIRNA	ACCESSION	LENGTH	Tissues and organs	V063V0632...combined V063 and V0632.CS,ovary,AGO1IP	V064V0642...combined V064 and V0642.ago2[414], ovary, AGO1IP	V065V0652...combined V065 and V0652.dcr-2[L811fsX], ovary, AGO1IP	V066V0662...combined V066 and V0662.r2d2[1], ovary, AGO1IP	V097.SRR069232.GSM609246..CS ovary	V0892.SRR073602.GSM628272.resequenced of V089.ago2[414] ovary total RNA Â	V098.SRR069233.GSM609245..dcr-2[L811fsX] ovary	V0882.SRR073601.GSM628271.resequenced of V088.r2d2[1] ovary total RNA Â	SRR068998.S2.head female	SRR013604.S22.head female	SRR016854.S24.male body	SRR018039.S23.female body	SRR069835.S1.head male	SRR069836.S3.male body	SRR069837.S4.female body	SRR069236.V090.male body	SRR069832.S5.Imaginal disc	SRR016853.S21.imaginal disc brain	SRR031692..head	SRR031696..AGO1IP head	SRR032152..AGO1IP head	SRR060644..ovary A2	SRR060647..AGO2 IP ovary A2	Cell lines	V094....FLAG-IP from S2-R+, FLAG-HA-AGO2	V095....AGO1-IP from S2-R+, FLAG-HA-AGO2	SRR013547.V020, SRR013548.V025 combined.cell line S2R+	SRR1015573..GFP knockdown, AGO1IP, S2R+	SRR1015574..dcr1 knockdown, AGO1IP, S2R+	SRR069830.S15.cell line S2-GMR	SRR013618.S30.cell line S2-GMR	SRR069831.S16.cell line KC	SRR016855.S33.cell line KC	SRR029028..cell line S2-NP mock	SRR029029..dcr1 knocdown S2-NP	SRR029030..dcr2 knockdown S2-NP	SRR029031..loqs knockdown S2-NP	SRR029032..r2d2 knockdown S2-NP	SRR029033..lacZ knockdown S2-NP	SRR032092..cell line S2-NP mock oxidized	SRR032093..ago1 knockdown S2-NP	SRR032094..ago2 knockdown S2-NP	SRR032095..dcr2 knockdown AGO1IP S2-NP	SRR032096..dcr2 knockdown AGO2IP S2-NP	SRR015372.V067.cell line S2-NP	SRR019717.OSS2.cell line OSS
MIRNA	ACCESSION	LENGTH	SUM	V063V0632.sense.normRPMdmestemloopmirbasev20plusITS1	V064V0642.sense.normRPMdmestemloopmirbasev20plusITS1	V065V0652.sense.normRPMdmestemloopmirbasev20plusITS1	V066V0662.sense.normRPMdmestemloopmirbasev20plusITS1	V097.sense.normRPMdmestemloopmirbasev20plusITS1	V0892.sense.normRPMdmestemloopmirbasev20plusITS1	V098.sense.normRPMdmestemloopmirbasev20plusITS1	V0882.sense.normRPMdmestemloopmirbasev20plusITS1	SRR068998.sense.normRPMdmestemloopmirbasev20plusITS1	SRR013604.sense.normRPMdmestemloopmirbasev20plusITS1	SRR016854.sense.normRPMdmestemloopmirbasev20plusITS1	SRR018039.sense.normRPMdmestemloopmirbasev20plusITS1	SRR069835.sense.normRPMdmestemloopmirbasev20plusITS1	SRR069836.sense.normRPMdmestemloopmirbasev20plusITS1	SRR069837.sense.normRPMdmestemloopmirbasev20plusITS1	V090.sense.normRPMdmestemloopmirbasev20plusITS1	SRR069832.sense.normRPMdmestemloopmirbasev20plusITS1	SRR016853.sense.normRPMdmestemloopmirbasev20plusITS1	SRR031692.sense.normRPMdmestemloopmirbasev20plusITS1	SRR031696.sense.normRPMdmestemloopmirbasev20plusITS1	SRR032152.sense.normRPMdmestemloopmirbasev20plusITS1	SRR060644.sense.normRPMdmestemloopmirbasev20plusITS1	SRR060647.sense.normRPMdmestemloopmirbasev20plusITS1	SUM	V094.sense.normRPMdmestemloopmirbasev20plusITS1	V095.sense.normRPMdmestemloopmirbasev20plusITS1	V020V025.sense.normRPMdmestemloopmirbasev20plusITS1	SRR1015573.sense.normRPMdmestemloopmirbasev20plusITS1	SRR1015574.sense.normRPMdmestemloopmirbasev20plusITS1	SRR069830.sense.normRPMdmestemloopmirbasev20plusITS1	SRR013618.sense.normRPMdmestemloopmirbasev20plusITS1	SRR069831.sense.normRPMdmestemloopmirbasev20plusITS1	SRR016855.sense.normRPMdmestemloopmirbasev20plusITS1	SRR029028.sense.normRPMdmestemloopmirbasev20plusITS1	SRR029029.sense.normRPMdmestemloopmirbasev20plusITS1	SRR029030.sense.normRPMdmestemloopmirbasev20plusITS1	SRR029031.sense.normRPMdmestemloopmirbasev20plusITS1	SRR029032.sense.normRPMdmestemloopmirbasev20plusITS1	SRR029033.sense.normRPMdmestemloopmirbasev20plusITS1	SRR032092.sense.normRPMdmestemloopmirbasev20plusITS1	SRR032093.sense.normRPMdmestemloopmirbasev20plusITS1	SRR032094.sense.normRPMdmestemloopmirbasev20plusITS1	SRR032095.sense.normRPMdmestemloopmirbasev20plusITS1	SRR032096.sense.normRPMdmestemloopmirbasev20plusITS1	SRR015372.sense.normRPMdmestemloopmirbasev20plusITS1	SRR019717.sense.normRPMdmestemloopmirbasev20plusITS1
dme-mir-989	MI0005848	174	1.29816e+06	104122	45848	69876.2	33843	232868	149756	196857	144325	26.7338	19.673	57.5103	33692.4	5.6823	124.311	30606.4	44.6668	124.663	192.31	10.9553	19.8212	26.1188	147283	108435	67990.8	12.1795	4.8295	102.709	36.7985	25.4395	6.3012	6.5191	353.708	127.84	4.6547	237.975	66.7481	2.4722	231.292	88.0439	6585.51	33.7201	476.765	1.3945	38.408	13.5913	15388.2
dme-mir-8	MI0000128	87	2.21099e+06	104951	77462.1	76247.1	87336.1	143545	128098	110613	139184	33339.8	31376.1	72505.6	46394.5	20172.2	59698.2	54579.6	357250	15472.9	11427.9	114742	160587	142416	96244.9	127343	1.54084e+06	36641.7	46614	23429	7412.12	6926.61	8399.63	6829.85	41509.2	30656.2	18331.6	18143.7	15607.9	21901	23705.1	17432.7	66004	21570.5	26646.6	7339.16	10915.6	14095.2	97.6421
dme-mir-184	MI0000354	100	955216	40163.6	44304.8	38603.3	41413.2	104314	105356	98023.1	50612.7	17221.9	14032.6	12828.3	22300.2	16154.8	11522.7	28460.9	58013.7	36071.8	26900.1	28856.9	50662.4	39667.7	21745.9	47985.3	1.00992e+07	97672.4	197853	222088	258960	353461	113358	182562	163377	188340	76116.2	101540	105572	200717	102675	156480	148111	160887	91380	125892	280187	143538	11410
dme-bantam	MI0000387	81	1.25812e+06	110696	149027	93705.4	92238.1	97674.5	102777	86594.8	148650	4111.66	4508.59	5854.56	8044.07	2665	6827.57	7182.61	92347.5	6350.51	5151.58	35735.5	35200.9	24323.3	108227	30229.4	1.28271e+07	383791	420397	493773	379047	343813	74391.1	58196	40812.9	24504.5	627104	477996	479606	493647	515305	461778	232360	381335	499302	601915	291786	614223	30928.4
dme-mir-318	MI0000430	68	971942	111693	45030.7	165753	213829	42029.3	73961.9	55670.2	56684	45.4475	16.2013	89.7162	54160.6	28.4115	267.748	38846.2	20.7605	58.6652	145.689	63.154	123.883	123.061	60563.6	52738.5	13976.8	11.7736	19.318	0.9025	31.537	31.336	27.3056	24.9899	134.32	108.43	119.028	165.33	271.759	43.2619	613.155	196.264	8738.68	116.723	776.504	88.5517	61.4528	209.88	288.899
dme-mir-994	MI0005855	91	460669	19983.3	26816.7	37605.8	39583.9	38466.6	39385.9	32245.7	38817.2	16.0403	9.2579	47.1585	27139.2	0	133.874	31466.7	5.662	14.6662	52.4482	35.4435	24.7766	20.8448	20344	108454	3219.58	3.248	2.3918	0.361	7.1248	5.1949	10.5021	24.9898	60.4438	46.8521	68.4911	165.33	106.479	22.8669	127.288	102.718	1225.48	163.413	181.05	6.9724	61.4528	49.9216	96.6355
dme-mir-2a-2	MI0000118	72	703452	55479.3	118424	59987.8	62758.3	36656.3	40688.4	53931.6	66895.4	11453.9	14370.1	10642.3	9969.74	17364.9	6845.1	9759.93	6814.85	22110.4	22183.8	8558.84	8898.78	9162.16	34814.5	15681.7	2.43591e+06	28403.2	80601.8	61916.6	11905.7	21196.7	14235.8	26566	40597.2	65920.9	30291.2	58470	53238.8	44233.9	58930.1	64921.8	79392.6	38215.3	44544	54157.2	49417.9	41407.1	16584
dme-mir-275	MI0000356	98	369216	43646.3	58801.2	42689	52216.3	33942.9	49608.1	30791	9265.47	323.479	534.644	645.267	1533.01	386.396	1128.37	2394.21	4887.4	3937.9	2977.89	2419.83	3284.55	2631.48	9094.94	12076.7	446772	1265.05	4329.58	897.665	19398.3	14178.5	955.697	1447.24	1853.61	2443.69	7543.99	20505.9	10926	4226.69	12662	18116.9	3355.75	5301.83	10549.2	12577.3	2289.12	2783.33	21912.1
dme-mir-9b	MI0000415	91	386589	43945.9	49344.4	41632.4	43836.8	25057.8	31054.9	19553.8	33762.8	622.898	617.964	2409.68	9737.11	363.668	1233.55	10551.1	1352.9	15047.6	10705.3	1263.08	1262.78	1164.05	32514.5	9553.6	406867	3079.8	5477.99	2393.71	862.801	392.964	5146.07	3130.25	17649.6	7204.56	8242.88	3534.55	6571.51	2221.19	5696.91	4301.32	3916.94	5812.83	7517.61	1932.28	1989.54	4622.59	17092.4
dme-mir-34	MI0000371	99	1.58782e+06	21995.1	16561.3	18797.5	14041.5	24930.4	30665	37239.9	12475.3	137321	186516	130420	106114	144984	110465	101676	119029	38418.4	33199.7	52351.4	105715	117377	20149.4	7380.17	800686	13940.7	26306.8	8503	4112.23	1680.83	29273.7	35110.8	33857.5	22878.7	8877.91	10428.3	10260.1	17467.3	15075.9	9336.33	8017.14	21121.7	13862.4	4312.55	7858.28	12887.1	10698.3
dme-mir-263a	MI0000343	94	317063	28985.8	26495.4	31910	12471.8	23823.7	25959.5	31605.7	6113.51	2283.07	3671.91	5742.99	5904.6	1824.02	4303.09	4508.56	17072.8	2691.26	5209.85	10107.9	4857.86	3943.21	7388.88	50187.1	30757.4	413.291	379.784	28.3397	256.608	144.69	138.629	119.517	6.716	28.7808	660.973	490.98	700.855	526.558	488.972	761.213	7856.78	902.661	376.182	475.181	829.614	177.209	85.5626
dme-mir-9c	MI0000413	92	288807	24309.9	30901.5	23976.9	27084	21853.8	22382.5	19719.8	21662.4	834.096	1135.25	1525.17	8077.76	687.56	1195.3	7804.49	1326.17	10149.1	10215.7	958.91	682.182	653.476	25382.1	26288.9	271279	2652.29	2251.75	860.842	1330.46	627.002	3982.42	2028.53	8433.03	4699.29	2901.23	1177.35	2329.83	1048.17	1778.93	1359.18	7696.45	3963.41	2361.7	633.285	1259.79	1847.1	28062.6
dme-mir-2a-1	MI0000117	76	395597	34047	68118.7	35480.8	37216.3	16792	22703.7	31446	32759.4	5674.07	6853.85	5066.7	3974.59	12614.5	4138.94	4634.67	5540.27	9204.09	9683.68	6401.62	7503.87	7698.24	22695.1	5348.5	1.53332e+06	17673.3	67546.4	31268.5	11349	20858.6	6429.58	13165.5	17847.9	32723	25439.9	57723.5	46316.8	39112.3	48026.9	51876.6	10697.2	23811.6	39082.3	47885.7	18944.9	30626.7	13536.9
dme-mir-2b-1	MI0000119	77	249691	18707.8	24440.5	20164.3	19814.1	13231.2	21114.9	21954.4	14513.2	4293.72	3987.95	3821.22	3749.97	5047.59	2553.17	4161.36	7627.42	10063.3	9331.11	4191.55	5709.76	4991.54	18174.4	8046.37	1.15226e+06	12816.9	36097	22783.6	12679	13439.6	11496.5	12703.9	15847.7	25337	17107.1	41996.3	25967.2	37276.5	30819.2	29996.8	6419.44	54824.1	26455.6	31250.7	21006.2	22280.3	11488.1
dme-let-7	MI0000416	78	283625	8017.77	4176.1	6410.46	5300.01	12982.3	7209.36	12995.4	9927.82	23413.4	25221.9	22020.7	18459.3	20626.7	15835.4	17713	27839.2	3292.59	2587.44	16489.6	5820.84	5619.59	6743.14	4923.26	90875.2	18.2693	10.5329	16.2457	166.802	175.493	10.5022	119.517	8.9547	90.3581	28.5934	150.3	61.9804	13.5965	124.183	155.911	2198.99	18.157	205.19	0.8715	7.6816	3.9206	268.767
dme-mir-2b-2	MI0000120	83	251792	18264.6	23589	19650.5	19099.5	12768.2	19829.7	20637.1	14278	4307.09	3972.91	3913.81	3937.39	5132.82	2687.04	4280.55	6946.42	10129.3	9377.73	4657.8	5873.29	5070.4	18741.6	14647	1.14247e+06	17063.7	33247.2	22149.7	12584.9	13333.6	11306.4	12840.2	17918.5	26637.1	17358.1	40373.1	26211.2	33084.4	31111.1	28498.2	13989.9	85934.8	26757.4	27760.4	24447.5	20967.2	11251.6
dme-mir-13b-2	MI0000135	70	275357	27943.8	28617.4	27308	34721.6	9505.7	12015	12995.9	25115.4	5611.43	2902.92	4285.68	5453.97	4457.76	2644.01	5830.04	2382.2	9005.12	7345.66	7197.94	6480.72	6749.65	24835.7	1951.35	526194	4882.16	13161.6	4540.22	32400.6	23402.9	12743.3	9804.73	11650	18128.8	13920.7	10954.4	18668	5586.64	12191.7	9004.34	5961.32	23796	18932.8	7476.44	2097.08	9798.5	8513.99
dme-mir-276a	MI0000359	98	1.21017e+06	8936.49	5258.89	8981	2816.97	9081.66	7521.53	9513.82	8336.61	95374.2	76959.1	89812.2	55659.9	112601	77178.3	57657.9	15868.6	105190	103145	125953	79796.3	88053.3	12575	53896.1	990707	76556.9	2710.85	9778.47	11537.8	5600.16	23931.2	12139.7	27750.4	24297	6165.86	6019.5	7887.4	3375.35	5778.4	5741.2	21027.8	14901.7	6246.22	1129.65	88803.3	4159.58	8760.61
dme-mir-13b-1	MI0000134	68	270625	27562	28377.9	27086.8	34474	8837.35	11573	12487.8	24721.9	5579.35	2797.61	4236.22	5289.72	4457.76	2605.76	5716.03	2360.81	8785.12	7001.83	7212.76	6479.9	6746.39	24709	1526.12	498809	3903.33	13066.2	4302.31	32380.9	23388.5	12119.5	9321.23	10978.4	17601.4	13374.7	10663.8	16695.7	5321.51	11626.7	8597.13	5010.71	15734.3	18277	7468.24	2043.31	9499.23	8252.27
dme-mir-11	MI0000131	75	279198	15436	19736.9	21676	14502	7876.29	11717.6	10657.3	20667.5	5921.53	3674.23	15035.5	15873.4	5301.6	8290.62	13722.7	6155.06	16668.3	13403.4	14799.9	4046.84	5034.93	17717.5	11282.9	1.04724e+06	8572.34	13072.5	19394.8	29214.4	20124.5	32926.4	21790.1	20866.5	20346.6	36693.9	27542.5	31217.4	10978.6	28521.8	31816.9	63610.3	30272.8	34282.8	9974.27	7458.85	15400.7	13283.4
dme-mir-276b	MI0000375	99	322608	3961.8	2885.43	3721.28	962.284	7793.66	5924.42	7810.58	4596.19	21498	22557.4	12497.6	12243	22456.4	20262.8	14375.6	13106.2	23836.4	29164.1	17647.3	9429.97	9167	3286.43	53423.6	408848	74324.4	1728.34	6007.12	152.765	79.379	4754.33	3320.4	11786.6	11502.2	1739.21	956.909	2766.86	2338.92	801.759	1307.82	17236.8	11986.2	653.792	434.479	88511.4	1484.72	617.058
dme-mir-10404/mir-ITS1	MI0000000	69	67385.7	4546.9	2040.94	4384.43	2718.78	7249.58	5830.6	3397.48	4238.14	981.131	740.63	1911.64	3301.86	267.068	1682.99	3617.21	1145.45	2881.93	2634.06	704.36	932.426	605.256	2548.45	9024.42	41416.2	367.01	184.717	202.169	139.514	42.4844	653.234	543.258	882.034	921.652	362.405	72.645	271.76	77.2535	195.589	234.784	1145.3	370.921	211.225	53.34	192.041	260.325	644.235
dme-mir-1	MI0000116	91	748012	12000.7	13781.2	15268.5	9732.09	6753.56	8044.31	9908.9	21763.2	32904	21134.6	96190.7	70366.6	8017.73	110848	90347.6	145685	4069.9	3554.82	36954.1	12785.6	8796.06	7404.08	1700.94	71681.1	16.6453	16.8343	3.4297	195.626	185.321	48.31	267.283	123.126	317.258	113.044	946.889	321.026	2.4721	984.152	383.358	34588.2	155.631	1021.93	0.3486	7.6816	0.7841	382.515
dme-mir-79	MI0000374	97	154646	13651.4	13949.1	14088.8	10209.3	5204.71	5683.08	4825.65	9114.82	1571.95	1084.33	1150.21	3390.3	1653.55	1252.68	3295.91	499.199	9041.77	9108.49	2894.13	1361.06	1008.84	30713.2	9893.79	396084	717.373	614.911	333.939	82.617	73.0617	4284.88	3221.52	8077.08	8434.77	3451.82	2289.57	2188.38	2591.39	1637.67	1296.81	7639.18	2028.39	1923.15	2899.72	2196.95	975.433	61443.1
dme-mir-31a	MI0000420	92	86623.2	3506.5	4411.5	4953.86	2671.35	5006.44	6155.72	11368.1	5529.26	1737.7	2289.01	4707.79	4325.27	1579.68	4121.41	4384.19	5979.69	2170.62	1963.89	1605.27	1598.09	1587.48	2645.76	2324.62	4248.99	3.2479	11.9127	10.2889	25.2952	17.746	10.5021	20.6439	26.8639	26.1034	21.2788	52.605	41.3202	3.7082	66.7485	42.1877	1282.74	10.3754	50.2917	5.4038	7.6816	4.1821	8.0529
dme-mir-7	MI0000127	88	123099	4153.85	1737	4094.15	4206.38	4937.27	6697.9	4439.75	3262.58	5325.38	5798.91	1298.59	2194.22	2517.26	1166.62	2000.35	3928.16	15458.3	13059.6	14598.2	12009.2	8628.8	792.716	793.771	28348	977.203	821.659	183.937	723.45	865.644	693.143	356.377	535.04	425.018	164.246	242.985	638.874	652.636	159.886	207.27	355.044	160.818	235.365	790.865	606.848	99.3207	779.124
dme-mir-995	MI0005856	90	112868	5893.34	7781.07	6965.22	6851.45	4412.31	4932.27	6251.45	5853.94	962.418	1570.36	378.418	3508.22	1045.54	411.184	2933.16	181.813	7252.49	9807.81	1107.77	436.068	483.703	13644.4	20203.4	249110	5542.08	1190.36	1673.49	9389.76	6444.72	7874.53	6797.25	8386.02	7295.58	5936.11	4418.81	7596.56	1468.43	4212.92	5278.97	32629.7	11711.2	5872.06	1868.65	6206.75	2364.61	6826.89
dme-mir-312	MI0000424	66	72620.6	3434.34	4949.64	3941.44	8055.21	4386.3	6094.61	3896.47	2338.15	77.528	87.9499	360.015	4443.19	11.3646	277.31	5887.05	70.7749	5514.53	5390.51	10.9554	18.9954	22.8541	5574.35	7777.06	4741.12	1.624	1.0119	0.361	301.119	458.865	6.3013	13.0382	13.432	343.361	1.3299	17.535	20.6601	0	17.0753	18.3424	481.028	2.5939	20.1167	0	0	1.5683	4.0264
dme-mir-996	MI0005857	97	283045	9717.98	14699.7	9677.18	10742.6	4215.55	3978.13	3537.46	10346.2	5672.92	5138.13	6244.48	13658.1	5204.99	7410.88	15235.9	1103.77	23224.1	22278.8	4063.12	6099.99	6404.66	45876.1	48514.5	1.30688e+06	9209.73	3656.03	10209.7	5672.61	6540.72	48526.4	49796.2	23002.2	28703.1	20587.2	22640.2	25914.1	26916.9	21010.3	16798.1	13171	18756.1	32224.9	25110.7	20456.1	11704.7	134071
dme-mir-92a	MI0000357	95	117734	1741.39	870.457	1770.81	1610.98	3556.59	2811.8	2259.07	959.356	700.426	1072.76	301.354	6793.23	363.667	315.56	8561.09	97.1977	20136.9	21783.4	148.218	13.2142	22.6029	2108.5	39735.8	139284	194.06	39.0041	18.9533	204.352	223.48	27.3056	29.3359	3279.63	2930.28	0.665	10.02	7.9462	3.7081	6.2092	3.6685	412.31	0	4.0233	0.5229	15.3632	0.7841	25216.8
dme-mir-281-2	MI0000370	92	69719.5	5929.75	4003.97	4671.38	4440.83	3023.27	3344.56	5830.89	2389.03	179.117	178.793	5617.05	3902	99.4403	4891.17	3876.33	5996.12	271.327	276.81	695.66	895.673	869.208	7283.45	1053.64	9848.01	54.8079	200.632	46.0295	315.841	100.817	257.303	221.107	195.883	187.075	221.433	42.585	282.09	75.0902	263.113	154.077	1884.03	110.239	222.29	99.0108	72.9752	77.7576	169.615
dme-mir-33	MI0000364	99	91354.8	6462.47	1954.71	6368.1	2357.86	1994.51	2178.45	2270.28	4806.54	556.063	1742.8	1100.75	1448.78	863.711	1214.43	1337.02	1030.96	894.645	1200.48	8452.32	8660.25	12972.8	11347.4	10139.5	528103	21332.8	2323.27	3976.95	3069.62	1065.73	4037.03	6426.76	6022	5323.1	6611.72	3484.45	7668.08	2039.49	2492.98	3613.47	88932.9	8832.07	2265.14	1511.83	9863.19	6869.59	30328.4
dme-mir-281-1	MI0000366	90	43554.6	2051.83	1898.25	1661.37	1674.87	1841.35	2060.77	2926.31	1809.35	133.669	126.717	4273.6	3076.54	71.0288	3915.8	2850.24	3490.07	219.994	224.362	284.515	428.222	391.533	4926.6	3217.61	6773.97	78.7611	103.49	50.3617	143.909	41.2898	190.089	136.358	148.871	113.45	144.297	52.605	119.987	59.6396	183.947	135.734	979.236	107.645	180.044	32.2485	418.648	50.0523	77.0064
dme-mir-998	MI0005860	143	63992.7	5750.46	5087.87	5563.01	4661.03	1656.01	2119.93	1983.19	2764.85	1657.5	2125.84	598.108	1330.85	1767.2	650.244	1419.94	273.82	6709.83	10384.7	821.646	593.812	612.288	3561.14	1899.38	137274	3235.69	4237.17	1592.44	730.968	164.402	6544.95	5036.01	8862.86	6288.25	3078.11	641.28	4731.16	527.794	2198.04	2415.7	8612.68	4355.08	1764.23	1163.72	1643.86	904.078	1810.91
dme-mir-14	MI0000136	63	1.48695e+06	5784.05	778.804	4112.17	4679.87	1585.77	1508.1	1400.46	2649.4	179707	134035	112813	133451	162986	159396	111004	1262.31	52351.4	59604.4	109116	111860	125248	10066.1	1549.74	2.86161e+06	9677.43	949.434	2972.96	16835	10718.9	383443	354936	291041	262404	7206.86	19048	19641.4	2195.85	15223.3	11080.7	4203.26	9049.95	23136.2	569.835	12113.9	2123.11	61871.9
dme-mir-999	MI0005861	105	55905.6	881.465	990.439	802.513	915.519	1556.92	844.686	1171.85	880.805	4034.13	2938.22	731.532	606.464	5386.82	898.868	673.694	2577.14	2390.61	2377.65	14970.1	4548.98	4764.44	471.371	491.382	37513.4	341.027	519.286	412.641	2705.63	1108.92	518.807	211.871	837.259	418.325	1631.82	819.134	1635.32	166.249	1560.05	2098.39	1214.02	1398.08	1472.54	142.415	92.1793	264.245	922.063
dme-mir-12	MI0000132	74	315193	3030.64	1643.44	2328.76	1993.78	1555.42	1237.5	1839.87	5394.64	4092.95	4705.32	69524.3	39024.3	2801.38	83833.8	30036.4	831.211	23158.1	23735.7	1929.42	839.926	846.103	9448.73	1360.75	92142.8	108.398	8.0493	63.7193	116.637	53.5748	871.681	604.104	15699.7	8414.01	54.5268	15.03	79.4619	16.6866	46.5688	38.5193	1065.14	57.0647	68.3968	1.7431	7.6816	28.228	3290.64
dme-mir-305	MI0000412	73	257869	6263.49	3175.83	6218.62	5311.55	1388.83	1659.95	2156.31	6989.2	11172.1	11992.4	15013.7	15578.5	12359	14831.3	14935.3	532.384	16778.2	27838.3	25930.5	18227.3	22983.6	11203.4	5329.61	479767	6258.64	753.587	855.607	4269	2255.21	6960.84	5501.04	15384.1	21442.3	1649.11	2149.29	4228.96	380.705	2101.8	1759.05	3390.1	1608.19	2166.57	209.177	253.493	1176.43	49673.6
dme-mir-304	MI0000411	88	28304.6	2349.24	1241.83	1842.12	1474.98	1323	1514.05	1226.46	2277.51	58.8144	79.8491	906.364	657.003	85.2345	822.368	673.694	857.163	469.322	402.103	2038.32	1406.48	884.026	4146.04	1568.64	54541.3	71.4532	69.6369	61.3726	344.519	134.358	71.4147	41.2876	1882.71	933.031	101.074	42.585	141.442	86.5237	105.556	113.723	91.6244	121.911	110.642	6.4496	0	53.8422	8549.21
dme-mir-87	MI0000382	99	15220.2	392.346	19.203	94.7478	163.622	1280.43	235.236	311.388	630.196	1061.33	1360.91	1274.43	918.119	733.017	1032.74	1171.19	1664.31	293.325	203.965	470.433	85.8921	54.7491	426.769	1341.85	674.433	0.406	0.138	0	0.4576	0.2247	0	0	4.4773	0	11.9694	0	6.357	21.0129	17.0753	16.5082	503.934	2.5939	28.1633	6.4497	7.6816	17.7732	0
dme-mir-10	MI0000130	77	62815.5	2015.47	1778.77	1472.77	923.745	990.481	981.934	1166.65	499.786	692.407	595.977	3793.38	3133.4	556.865	4236.16	4249.45	9114.4	3505.25	2989.55	2945.68	1940.83	1489.53	12032.6	1710.38	46146.9	4.8718	22.3077	1.9855	16.0464	15.8084	2.1004	30.4224	40.2959	69.6092	7.9795	67.635	22.2494	1.236	34.1504	33.0165	1385.82	23.3447	60.3501	3.3119	23.0448	0.2614	10.0661
dme-mir-313	MI0000425	71	24982.6	750.171	756.542	953.016	1427.03	977.013	809.213	819.297	939.651	48.121	33.5597	105.819	1954.16	5.6823	76.4993	2674.05	12.4251	3424.58	3548.99	4.511	3.3036	4.5205	1543.87	4110.6	2059.78	0.406	0.092	0.1805	23.9547	9.912	4.2008	15.2112	4.4774	174.023	0.665	0	0	0	0	0	0	0	18.105	0	0	0.7842	1.0066
dme-mir-31b	MI0000410	127	18942	454.69	1151.49	785.254	762.399	926.637	1756.32	1090.71	720.659	32.0806	24.3019	1352.65	1246.62	11.3646	1501.3	1005.36	1204.43	1913.95	1649.2	25.1327	17.3436	20.8449	911.318	377.986	1714.61	0	1.0119	0.1805	1.34	1.2636	6.3012	18.4707	6.7161	8.0318	1.9949	37.575	0	0.618	6.2092	0	0	0	10.0583	0.6972	0	0.5227	0
dme-mir-282	MI0000367	97	180989	2433.87	1390.4	1818.26	2274.68	824.056	774.494	662.6	5899.98	2301.78	3291.18	5024.11	8254.65	3068.44	4895.96	8063.6	103.803	27983.4	34691.5	6601.53	2579.24	2680.2	30641.2	24729.7	1.07047e+06	53868.8	1607.53	21409	1526.9	848.995	28395.7	18882.6	6895.08	8281.49	12916.2	26748.3	14544.7	3205.7	13736.3	18694.7	18428	13249.4	29245.6	298.252	3011.2	4351.29	40865.7
dme-mir-92b	MI0000379	100	30699.5	3398.85	2033.13	3567.62	2810.55	704.018	859.936	544.687	852.233	74.8547	100.679	42.5576	1684.62	51.1407	143.436	2560.03	4.7184	3805.91	4702.85	60.5763	57.8121	70.3201	1680.72	888.267	112129	31.6668	16.3743	5.0542	186.672	176.981	42.0085	20.6438	1000.68	860.744	1.9949	0	1.5892	0.618	15.5229	0	377.951	2.5939	20.1166	0	0	5.4889	24414.6
dme-mir-279	MI0000363	100	176539	4540.29	2469.88	3572.73	3524.06	670.101	777.306	914.475	1371.64	9364.85	7437.56	8451.73	22089.6	11626	13636	20801.6	142.965	21434.8	15897.6	6068.58	5582.99	6041.26	8723.92	1398.55	748322	2681.93	664.816	2266.64	44851.6	65753.1	34699.2	27260.7	22588.1	17581	2860.66	4311.1	7601.33	1121.1	2271	3349.34	1786.68	2578.29	4842.09	1703.23	891.067	1505.49	77496.6
dme-mir-317	MI0000429	92	510953	2709.72	1277.48	2234.24	1179.19	533.105	385.462	865.585	1241.85	42472	65324.8	31928.6	25084	55675.2	37484.7	23216.6	1661.64	23678.8	28141.4	29483.9	63468.5	70200.4	2158.17	548.08	349759	9984.35	1800.07	2558.16	19743.8	7239.41	19151.8	18378.4	31168.9	27674.3	2617.29	4078.13	3648.89	1808.96	4392.99	4519.59	916.244	2757.26	4220.48	588.486	960.202	1060.12	9461.22
dme-mir-308	MI0000419	63	55065.1	559.418	164.053	612.41	600.327	496.862	429.157	362.654	1183.19	983.805	1240.56	749.935	1604.6	1750.15	1166.62	1886.34	184.172	1026.64	2231.96	2748.49	6147.89	6875.05	1611.79	20449	699061	60998.2	361.339	1740.09	852.996	603.865	3087.63	8353.14	3740.8	7102.15	593.811	1179.85	2180.44	527.794	1544.53	808.904	2485.32	2643.14	1168.78	39.9179	5638.31	933.614	122339
dme-mir-311	MI0000423	84	30189.3	1231.1	872.262	1519.04	2427.38	488.465	517.412	797.453	1168.67	93.5684	54.39	271.449	3744.08	11.3646	372.935	5565.75	14.3124	4069.9	4079.3	15.4662	21.4731	27.877	1814.53	1011.11	3084.03	0	0.138	0	237.032	54.3327	16.8034	17.3842	4.4773	295.839	0	0	0	0	0	0	0	0	8.0467	0	0	0	3.0199
dme-mir-988	MI0005847	99	81229.4	946.879	358.29	1167.24	534.734	467.933	239.562	252.989	362.39	4996.55	4774.76	4607.74	9442.31	4699.26	5708.77	7172.25	89.6483	10970.4	14475.7	614.14	1270.21	1268.53	496.714	6312.37	288333	3223.51	245.017	249.823	1947.34	4180.63	28935.6	31836	33738.8	23594.8	601.791	606.21	2221.76	297.889	363.236	981.324	4031.47	1079.04	687.989	19.1744	1390.37	265.813	1949.82
dme-mir-283	MI0000368	100	9319.82	469.625	112.461	403.987	172.934	439.835	275.794	482.201	513.848	48.121	49.761	202.437	374.828	28.4115	239.06	373.123	64.7986	212.661	349.654	914.443	606.201	497.765	484.549	2003.32	45812.9	1352.33	93.4166	187.367	648.907	134.947	96.6201	91.2673	2073	1767	63.1714	35.07	152.567	18.5407	142.811	78.8727	343.591	137.474	90.5249	21.2663	176.677	58.0243	1787.75
dme-mir-970	MI0005827	95	25474.1	536.155	830.045	832.249	761.416	393.864	393.25	679.02	425.355	2753.59	2890.77	940.87	1170.81	2432.03	1109.24	1088.27	443.995	1151.3	1328.69	1995.15	1101.73	1082.93	897.126	236.241	45825	157.116	256.24	233.397	2838.6	676.673	2388.19	1388.57	2646.1	2006.62	1676.37	1077.15	2743.03	519.142	903.433	1595.79	1340.01	1034.95	1305.57	605.221	629.892	419.237	1631.73
dme-mir-306	MI0000414	85	45879	2595.68	1630.41	1896.51	2393.82	357.703	444.839	362.728	1877.96	614.878	788.078	493.439	1827.82	914.851	898.867	1875.98	18.5587	5961.85	7121.3	3642.95	1641.86	1595.01	5827.77	1096.16	385937	2460.66	249.892	451.269	391.382	167.322	5219.58	6072.54	9118.06	8360.47	586.496	1152.3	1169.68	293.562	1175.08	744.705	0	767.78	1563.07	437.878	215.085	213.801	76017.9
dme-mir-310	MI0000422	89	34290.4	384.856	247.083	346.713	539.648	351.053	512.544	299.872	127.365	141.689	122.667	499.191	4738	17.0469	736.306	5669.4	5.1903	9291.1	9294.97	17.3995	14.866	11.0502	572.742	349.637	6771.66	0	0.414	0	62.5509	28.0788	16.8034	26.0764	8.9546	750.976	0	0	0	0	0	0	0	0	0	0	0	0	6.0397
dme-mir-962	MI0005817	92	8238.52	171.352	16.0441	21.4682	8.8976	297.019	44.127	53.7926	20.9587	5.3468	3.4716	101.218	12.6345	5.6823	76.4992	51.8225	153.188	1019.31	1888.13	3.8666	5.7813	2.7625	155.096	4120.05	288.762	0	0.092	0	0	0	0	0	0	0	13.2993	0	12.7139	12.3606	3.1046	51.3589	0	18.157	0	9.5873	69.1345	0	5.033
dme-mir-1012	MI0005873	59	8191.42	347.496	241.016	294.447	262.841	282.887	546.721	183.742	216.574	291.399	260.378	187.484	357.982	232.974	286.873	248.749	147.526	659.984	600.239	534.231	214.73	160.23	1226.58	406.335	7047.81	183.099	26.1715	53.7913	28.7917	17.5496	340.271	216.217	94.0237	60.9081	105.064	22.545	336.919	34.6095	29.4936	25.6795	1019.32	223.071	86.5016	8.7156	215.085	45.4783	139.92
dme-mir-986	MI0005845	100	14993.3	358.151	684.493	2163.57	331.59	266.594	633.244	1747.37	181.463	128.322	116.881	562.452	357.982	68.1876	305.998	279.842	289.391	65.9983	116.552	1127.11	1344.55	1283.85	1615.84	963.865	16574.9	1.624	1.3339	2.3466	5.4905	1.1513	6.3013	10.8652	62.6827	82.9955	9.3095	0	28.6064	1.2361	6.2092	0	309.232	0	14.0817	1.9174	7.6816	5.7502	137.907
dme-mir-277	MI0000360	100	539572	331.91	353.979	453.409	630.9	262.521	236.75	370.01	1361.34	35930.2	25223.1	98733.9	60578.9	23950.9	84264.1	66944.5	12997.2	1811.29	2179.52	56289.6	31532.4	32997.3	1411.07	727.623	231082	11695.6	2861.78	2672.42	38004.4	20829.5	7765.29	6340.92	3772.14	3493.85	2996.98	1766.02	9517.95	1001.2	2870.19	2725.7	16481	6137.05	3783.95	884.995	2020.27	1119.97	3056.09
dme-mir-984	MI0005842	90	21863.6	100.68	54.1494	285.116	110.34	261.856	190.785	514.225	92.7918	24.0605	13.8868	685.523	29.4807	5.6823	707.62	103.645	274.606	9100.45	9114.32	4.511	4.9554	3.2649	30.411	151.195	12685.2	15.4275	8.8771	5.2347	160.626	47.2569	52.5108	43.4605	152.229	62.9159	9.9745	0	15.8924	48.824	21.7321	0	11.453	20.7509	0	27.3673	115.224	3.1365	13.0861
dme-mir-316	MI0000428	89	16980.6	543.553	405.07	787.909	747.19	247.558	180.293	404.039	744.663	427.741	239.548	2025.52	1680.41	346.621	1482.18	1824.15	243.937	175.996	244.758	663.117	805.238	759.207	1623.95	377.986	941.078	0.812	0.368	1.2635	12.0265	10.2489	0	2.173	0	9.3704	0	10.02	0	0	6.2092	0	618.464	0	42.2451	0	0	0	0
dme-mir-9a	MI0000129	78	141001	190.52	240.165	173.186	167.14	239.162	430.346	288.8	315.098	3576.98	3396.49	6195.02	5875.12	2818.42	4350.91	5420.64	10422.1	38843.7	32797.6	12788.7	5175.82	5615.57	1528.66	151.194	8100.18	2.0299	1.1959	1.444	15.8503	16.679	102.921	189.054	185.808	250.325	16.6241	77.655	28.6063	0.618	90.0329	104.552	3504.64	0	72.42	0.5229	0	0.2614	3.0199
dme-mir-307a	MI0000418	88	57295.1	228.997	385.014	226.325	182.4	236.668	188.838	258.71	285.183	6512.36	5503.81	1396.35	1330.85	7398.36	946.68	1409.57	1173.45	4817.88	3822.89	6360.51	6719.42	6569.66	1076.55	264.59	62422.4	95.8122	267.738	1031.78	2556.21	1898.55	1953.4	1658.02	49.2506	80.9875	1206.91	1951.39	1133.13	460.43	1401.72	1157.41	687.183	645.869	1353.85	292.151	107.543	403.817	620.077
dme-mir-284	MI0000369	100	45441.7	448.13	408.479	330.328	79.8712	224.365	313	388.362	161.221	6461.56	10348	2453.39	1705.68	6585.78	2457.55	1627.23	233.4	696.65	763.411	6517.1	1229.74	1367.98	177.398	463.033	2049.33	56.8377	23.1817	47.6541	113.794	18.504	0	15.2112	11.1933	14.725	58.5168	0	58.8017	0.618	13.9707	36.685	217.608	23.3448	12.07	1.9173	7.6816	9.1481	2.0132
dme-mir-929	MI0005853	88	13190.6	122.64	30.7851	41.4569	26.0719	199.343	68.4619	229.807	63.772	769.933	977.865	174.832	134.77	960.309	172.124	93.2806	3032	205.328	238.93	2419.83	1471.73	1380.54	93.2606	283.49	10730	682.458	159.19	69.676	13.4645	2.8361	2.1004	3.2595	4.4774	0	19.2839	10.02	25.4278	1.854	24.8367	53.1932	732.995	18.157	24.14	2.2661	69.1345	9.9321	11.0728
dme-mir-980	MI0005837	98	7206.41	81.9773	132.667	129.302	134.55	184.047	300.128	215.616	196.063	208.524	218.717	307.106	231.636	125.011	248.623	414.581	1447.74	80.6646	46.6206	516.832	818.453	684.366	199.7	283.49	443167	5287.94	9822.8	8069.6	6924.07	1036.48	3201.06	2184.99	673.836	772.395	7275.35	7775.51	13812.1	28954	8993.98	14316.4	2118.81	6474.25	5604.51	17054.2	26125.1	7613.44	0
dme-mir-125	MI0000417	110	129244	295.296	243.172	343.414	259.271	181.387	125.135	205.214	317.247	15684.7	8840.12	14193.6	9480.21	13546.6	10480.4	8923.85	538.047	2009.29	1445.24	11532.7	14584.3	13824.5	1075.54	1115.06	41038.6	6.0898	1.4259	3.4297	21.5692	16.0892	21.0043	72.7967	6.716	50.1989	10.6394	110.22	12.714	0	31.0458	0	7639.18	5.1877	20.1166	0	0	0.2614	131.867
dme-mir-1010	MI0005871	71	17763	1458.57	1588.04	1834.69	1364.54	179.392	199.437	179.656	287.78	550.717	542.744	175.982	181.097	494.36	258.185	269.477	78.9534	901.977	990.688	1230.86	1897.89	1966.2	706.549	425.235	4122.33	0.406	0.69	0.9025	33.269	27.4613	2.1004	8.6921	158.945	91.6968	53.1969	10.02	111.247	55.0043	34.1505	20.1767	125.984	20.7508	52.3033	3.1376	145.95	1.0455	242.595
dme-mir-964	MI0005819	100	7988.07	163.443	28.8297	17.4096	17.3297	126.855	23.0368	17.0888	13.6142	29.4073	24.3019	430.177	37.9039	0	439.872	103.645	176.308	2801.27	2855.51	10.3108	5.7812	2.0091	106.439	557.53	765.435	0	0	0	0.2615	0.1966	0	0	0	2.008	5.3197	0	44.4987	9.2705	0	23.8453	309.232	0	10.0583	10.9817	84.4977	1.5683	15.0993
dme-mir-959	MI0005814	98	7751.8	73.7891	5.064	7.7753	6.3628	115.133	13.7358	20.5067	5.5531	5.3468	15.0439	368.066	42.1151	11.3646	258.185	20.729	368.973	2918.59	3111.93	6.4443	0	2.009	110.493	264.59	177.865	0	0	0	0.0327	0.1124	0	1.0865	0	2.0079	7.3146	0	3.1785	3.0902	0	12.8398	0	0	0	4.7063	23.0448	0.5228	2.0132
dme-mir-1003	MI0005864	56	13213.3	29.3109	7.2699	36.9054	41.7462	106.82	102.747	65.7548	40.0366	1184.31	752.203	664.82	1149.75	630.735	745.869	766.974	11.9531	2309.95	2616.58	650.872	607.851	637.152	53.7262	0	24846.5	47.5002	9.8891	51.0836	209.941	34.9022	3121.25	1744.95	2017.03	908.266	247.366	245.49	588.018	46.9698	364.789	346.673	183.249	342.388	639.71	0.8715	38.408	62.206	973.401
dme-mir-314	MI0000426	90	18351.2	90.3517	73.5534	66.9455	73.1981	89.3636	157.906	204.322	84.2829	8.0202	3.4717	1451.57	1524.59	0	965.805	1150.46	1998.05	2192.61	2558.31	98.5975	150.311	122.558	5154.68	132.295	1218.28	0	0.138	0	26.2425	22.0982	0	1.0865	4.4773	0	6.6496	35.07	33.374	1.8541	45.0164	51.359	503.934	23.3447	38.2216	0.1743	0	0	0
dme-mir-100	MI0000378	100	12638.5	121.524	92.8065	85.0761	48.0057	67.9163	48.7777	55.6501	82.8497	283.379	457.109	691.275	480.117	170.469	181.686	435.31	89.6483	131.997	128.206	2513.91	2689.08	2430.82	218.959	1133.96	2921.62	0	0.046	0.5415	1.6995	1.3759	0	2.173	0	3.3466	3.9898	0	12.7139	1.236	3.1046	0	0	0	10.0583	0	0	0.5227	59.3906
dme-mir-954	MI0005806	87	2496.49	15.6322	21.3088	20.482	18.1054	64.0092	85.6586	54.1641	26.8703	213.87	205.988	103.519	105.289	261.385	133.874	134.739	46.5543	124.663	151.517	56.0652	77.6335	79.361	23.3151	472.483	2398.14	105.15	84.1255	17.5089	85.7868	14.4606	23.1047	24.9898	136.558	72.9558	11.9694	0	31.7848	0.618	3.1046	0	0	2.5939	2.0117	2.0917	23.0448	7.3185	20.1322
dme-mir-278	MI0000361	98	112253	35.9174	30.9355	27.0058	58.4551	50.1267	33.6361	66.572	93.1501	8987.91	9296.08	9370.74	8305.19	7500.64	8051.56	9307.34	78.9533	7531.14	5722.67	10986.2	14685.9	11686.2	213.891	132.295	67526.9	33.2908	4.9215	3.0686	38.2366	22.1825	98.7204	121.69	2453.57	1576.92	22.6087	15.03	0	11.7425	4.6569	23.8452	240.514	0	0	0.8715	7.6816	0.2614	13454.5
dme-mir-960	MI0005815	93	7474.48	81.791	16.395	12.3649	10.139	49.7111	8.9771	9.0646	6.9863	13.3669	11.5724	293.303	25.2692	0	286.873	51.8226	138.247	3285.25	2838.03	10.9552	5.7813	6.2786	104.411	207.893	436.312	0	0	0.1805	0.0981	0.365	0	4.346	2.2387	0	2.6599	50.1	31.7848	3.7081	6.2092	14.674	0	5.1877	0	6.2753	46.0896	1.0455	28.1853
dme-mir-965	MI0005821	107	8399.41	77.6972	25.2697	81.814	109.461	49.2953	27.3634	35.1436	126.559	355.559	536.958	235.792	442.213	420.49	382.497	611.506	11.796	975.309	1002.34	1687.11	560.776	398.816	236.193	9.4497	56236.9	311.39	59.886	621.489	1628.54	718.538	1159.44	1664.54	1336.48	1320.57	436.215	1239.97	745.354	36.4634	920.509	715.358	0	427.986	1160.73	6.9724	7.6816	81.0249	6589.33
dme-mir-983-1	MI0005840	91	2890.58	74.2777	23.7907	289.364	99.0633	49.0046	29.0395	72.2555	49.9339	2.6734	1.1572	100.068	2.1058	0	66.9368	10.3646	42.6222	696.65	1238.36	9.6664	2.0646	2.6371	23.8221	4.7248	7528.89	7.5107	4.0936	0.9928	88.4497	27.2503	6.3012	0.5433	10.0739	9.0358	9.3094	0	13.5085	1.236	0	0	0	0	6.035	0.8716	3.8408	3.0057	49.8276
dme-mir-983-2	MI0005841	99	2890.58	74.2777	23.7907	289.364	99.0633	49.0046	29.0395	72.2555	49.9339	2.6734	1.1572	100.068	2.1058	0	66.9368	10.3646	42.6222	696.65	1238.36	9.6664	2.0646	2.6371	23.8221	4.7248	7529.28	7.5107	4.0936	0.9928	88.4497	27.2503	6.3012	0.5433	10.0739	9.0358	9.3094	0	13.5085	1.236	0	0	0	0	6.035	0.8716	3.8408	3.0057	49.8276
dme-mir-252	MI0005858	93	240164	170.747	74.6062	90.5375	105.478	47.8821	56.3486	91.6109	78.1029	37609.2	33164	26228.2	14790.9	34326.8	22576.8	16313.8	1289.83	11681.7	10670.3	12394.9	9272.22	8823.18	183.48	122.846	240148	2971.39	553.738	1070.23	3950.14	1340.99	27860.1	25273.4	304.458	785.111	392.993	285.57	371.882	212.601	299.592	365.015	3882.58	581.023	158.922	256.591	3072.65	3308.16	12.0794
dme-mir-966	MI0005822	87	1697.71	1.6284	0.3008	2.5412	3.5694	38.9043	3.1366	43.4651	9.3149	24.0606	28.9308	20.7036	54.7502	28.4115	19.1248	41.458	11.4813	14.6663	29.1379	8.3776	6.6072	6.7808	15.2055	1285.15	1325.84	24.359	0.782	2.888	0.7518	0.8987	31.5065	40.2012	87.3076	46.1832	14.6292	0	6.3569	8.0344	4.6569	31.1822	286.326	57.0648	0	1.0459	199.722	16.9891	1.0066
dme-mir-1006	MI0005867	64	3686.03	31.0324	3.8103	25.6781	7.0352	33.9995	23.3617	26.5249	30.2741	157.73	153.912	89.7161	126.347	142.058	181.686	82.9161	9.4368	131.997	134.034	1739.31	294.841	216.737	43.5892	0	3995.3	10.9618	4.3236	8.6643	279.256	29.3145	121.825	97.7865	217.15	101.737	70.4861	20.04	54.0342	3.7082	55.8826	0	0	44.0957	132.77	1.0458	0	17.2506	343.258
dme-mir-961	MI0005816	89	1446.84	47.5951	9.1249	9.4445	5.8455	30.342	8.8688	9.0645	9.0464	2.6734	3.4717	113.871	4.2115	0	105.187	0	172.848	366.658	372.965	5.1553	2.4777	3.5159	98.3291	66.1476	358.181	0	0	0	0.098	0	0	0	0	0	0.665	0	28.6063	1.2361	7.7615	36.6849	137.437	0	28.1633	35.0372	23.0448	0	7.0463
dme-mir-274	MI0000355	100	116766	150.183	52.1441	49.3085	65.904	27.5988	15.2498	53.1239	53.1135	7581.71	5270.05	3197.57	1482.47	7154.02	2304.54	1565.04	878.237	7.3331	29.1378	29748.2	28969.6	27937	145.973	28.349	1885.72	21.9232	10.4869	7.5814	29.5434	13.0848	2.1004	5.4326	0	4.0159	1.9949	35.07	3.1785	0	45.0165	12.8397	1099.49	10.3754	58.3384	0.1743	0	0	0
dme-mir-190	MI0005808	100	23293.6	53.1783	15.8439	52.6462	30.1586	26.2685	18.7108	31.5029	42.4548	796.668	1393.31	456.632	425.367	1699.01	525.933	383.487	13.6832	1180.64	1771.58	4875.75	4900.8	4447.75	29.3973	122.846	18280.6	1424.6	40.384	39.8921	621.422	169.484	359.175	1168.01	689.506	676.013	15.9592	60.12	475.183	2.4721	68.3008	40.3534	45.8122	70.0341	52.3034	8.7158	30.7264	22.478	1796.82
dme-mir-13a	MI0000133	75	23370.6	129.34	72.1493	88.6032	147.637	21.7798	18.3863	23.7014	41.5593	2619.92	1513.66	426.727	164.251	4068.53	267.748	269.478	157.278	3659.24	2931.27	2855.46	2006.9	1836.27	50.6851	0	2897.58	11.3676	30.679	14.0796	40.5894	26.6751	52.5108	31.509	127.604	283.792	51.202	102.705	47.6772	32.7553	54.3303	97.2152	11.453	64.8463	72.42	11.679	0	41.5578	86.5691
dme-mir-5	MI0000123	69	668.151	26.4727	5.2646	17.0304	18.9333	21.1147	19.4679	14.7856	14.062	122.976	102.994	3.4506	8.423	5.6823	9.5624	10.3645	6.1339	36.6657	75.7583	34.7993	43.7721	57.2604	13.1781	0	4740.18	17.4574	6.0715	1.805	3.3988	2.1059	29.4061	42.374	20.148	566.914	19.9489	0	14.3032	8.6524	1.5523	0	366.498	12.9693	38.2217	6.4495	15.3632	5.4887	9.0596
dme-mir-375	MI0005813	91	16321.8	9.1188	27.2753	9.8616	20.2265	19.5351	68.2455	50.2263	70.9373	56.1411	43.975	3029.64	1579.33	51.1407	1950.73	1409.58	3120.7	1642.63	1509.34	392.457	96.6287	81.8728	1006.61	75.5972	1016.44	0.406	0.184	0	8.7584	7.2725	2.1004	2.173	0	1.3386	0	12.525	7.9462	0	23.2844	0	400.856	2.5939	32.1867	0	0	0	8.053
dme-mir-1013	MI0005874	61	533.395	15.4463	11.8327	19.761	10.4493	14.9631	5.9485	11.3678	8.0611	26.7338	38.1887	16.1028	33.6924	62.5053	28.6872	20.729	8.8076	14.6663	40.793	42.5321	52.0308	36.9181	13.1781	0	797.046	0.406	0.828	1.444	13.0071	2.0497	2.1004	7.6056	8.9546	14.0557	21.9438	0	17.4817	1.236	0	7.337	0	5.1878	8.0467	1.3945	0	25.0916	5.033
dme-mir-4969	MI0017755	158	398.831	1.6285	1.6044	2.9205	1.5518	14.8801	7.7872	8.7674	5.6428	29.4073	27.7735	9.2016	0	45.4584	9.5624	20.729	3.9321	58.6651	104.896	16.1108	4.1294	4.2694	1.0137	18.8993	761.178	4.06	0.9199	7.2202	0.2615	0.0281	14.703	8.692	24.6253	14.725	3.3248	0	3.1785	4.9442	0	20.1767	229.061	5.1877	0	1.0458	69.1345	6.7957	0
dme-mir-2279	MI0011289	113	593.353	33.8704	30.7349	47.6395	49.9196	14.88	22.0634	22.2155	33.6774	18.7137	15.0439	11.5021	29.4808	22.7292	19.1248	31.0935	4.5612	7.3331	29.1379	23.8438	4.9554	6.0274	48.6577	66.1476	688.603	49.1241	5.2895	13.5379	4.935	4.2401	16.8034	6.5191	20.148	14.0557	0	0	0	0.618	0	0	148.89	0	0	0	0	0.2614	11.0728
dme-mir-1000	MI0005862	100	38809.6	12.6549	1.2535	2.0102	1.345	14.215	3.7854	10.3276	5.4636	900.93	1865.47	215.089	160.039	1460.35	133.874	165.832	2241.99	3167.92	4277.44	9792.09	6313.89	8044.38	19.2603	0	7432.54	2.8419	0.7359	1.8051	1.6014	0.9547	2.1004	1.0865	1936.44	1764.33	2.6599	0	7.9462	0	10.866	14.674	68.7183	2.5939	14.0817	0.8715	7.6816	2.091	0
dme-mir-3	MI0000121	69	527.456	4.5595	6.6182	5.6134	12.1048	13.0512	15.8989	7.5785	5.7322	237.931	37.0316	14.9527	37.9039	17.0469	0	10.3645	8.1785	7.3331	5.8276	16.1107	15.6918	12.8083	16.2192	18.8993	9830.65	8.5257	7.4973	1.9856	2.255	0.6459	31.5064	48.8932	17.9094	1090.32	11.9693	57.615	7.9462	21.6308	31.0459	12.8397	183.249	10.3755	26.1517	9.9359	15.3632	2.6137	0
dme-mir-963	MI0005818	89	6629.3	42.4777	4.8633	5.0446	3.6729	12.5523	2.2714	2.0804	3.4036	5.3468	5.7862	340.462	37.9039	5.6823	296.435	51.8226	32.8712	2089.94	3648.06	14.1773	1.6518	2.5114	20.274	0	318.314	0	0	0	0	0	0	1.0865	2.2387	0.6693	5.3197	0	0	0	0	0	0	0	0	0.8715	0	0.2614	10.0662
dme-mir-4919	MI0017702	60	113.39	14.4693	11.2811	0.8345	0.1035	11.9704	4.1099	0.2229	0.2687	0	1.1572	9.2016	0	0	9.5624	20.729	5.9766	0	17.4827	3.8665	1.6518	0.5023	0	0	31.0516	0.406	0	0	0.5228	0.0843	0	0	2.2387	0	0	0	0	0	0	0	0	0	0	0	0	0.2614	1.0066
dme-mir-1005	MI0005866	61	627.982	26.1471	9.4761	20.7474	17.0709	10.5575	6.0567	8.6188	17.6447	29.4072	21.9875	8.0514	25.2693	79.5522	9.5624	20.729	5.8193	14.6662	17.4827	67.0205	62.7673	46.9638	102.384	0	197.158	0	0.23	0.5415	1.0458	0.0843	2.1004	0	0	0	4.6548	0	15.8925	0	0	0	0	23.3447	0	0	0	1.8296	6.0397
dme-mir-1014	MI0005875	68	541.656	37.1736	10.9802	24.9196	21.5714	8.7285	8.0036	16.1973	6.7177	0	0	66.7121	46.3269	0	76.4992	31.0935	25.1645	14.6662	5.8276	4.5109	3.3036	1.2557	37.5069	94.4966	64.0815	0	0	0	0.0327	0	0	0	0	0	0	0	0	0	0	0	0	0	0	0	0	0	0
dme-mir-982	MI0005839	93	3528.84	15.2135	6.0166	45.6289	19.1401	8.3128	4.8671	13.6711	6.5385	8.0202	1.1572	118.471	4.2115	5.6823	133.874	0	28.9392	1657.29	1439.41	2.5777	2.4777	1.2556	6.0822	0	2804.46	0.812	1.2419	0	77.3224	63.7675	0	14.1247	24.6253	8.7012	14.6292	0	11.1246	1.236	1.5523	33.0164	0	10.3754	0	2.0917	0	0.5227	26.1719
dme-mir-991	MI0005851	96	1994.74	13.4459	35.6986	30.2679	46.6606	8.1466	12.4378	17.9061	23.0188	2.6734	0	54.0597	0	0	28.6872	0	67.3148	747.982	699.308	2.5777	0	0	34.4658	170.094	139.244	2.0299	0.368	0	3.7257	1.3477	0	0	0	0	0	0	0	0.618	0	0	0	7.7816	16.0933	0	0	0	1.0066
dme-mir-1008	MI0005869	57	3144.96	15.7255	4.6127	9.4822	8.2767	6.8997	8.5444	5.1267	14.0621	334.173	438.592	142.626	181.097	352.303	181.686	176.197	2.3591	432.656	431.241	326.725	23.9507	31.3928	17.2329	0	5770.6	45.4702	9.475	19.4949	8.399	0.8986	197.441	162.978	389.526	288.477	63.8363	32.565	28.6064	0	68.3009	29.348	206.155	36.3141	84.49	3.8349	0	17.5117	557.668
dme-mir-987	MI0005846	94	30808.8	13.2596	31.5872	11.5302	6.8803	6.8164	30.2833	7.8758	14.7786	3916.5	6287.26	422.127	315.867	2227.47	258.186	518.226	1520.72	1063.31	862.48	6181.35	4344.99	2747.01	20.274	0	8985.34	12.1796	1.564	0.5415	0.6538	0.3652	0	5.4325	6.716	14.725	1208.9	142.785	1025.06	706.404	630.231	889.612	1088.04	510.988	696.038	300.867	76.8161	1134.61	0
dme-mir-4949	MI0017735	99	155.405	3.2569	4.9134	4.0584	2.2242	5.9852	8.6526	7.3557	0.8062	8.0202	6.9433	12.6522	12.6345	5.6823	9.5624	10.3645	10.0659	7.3331	0	1.9333	0.8259	1.7579	2.0274	28.349	74.33	0.812	0.9659	0.9025	0.1962	0	0	1.0865	2.2387	10.7091	3.3248	0	0	0	0	0	0	0	0	0.5229	0	2.8752	1.0066
dme-mir-2c	MI0000431	102	9680.75	26.2558	17.7454	22.7147	16.7502	5.4477	5.7035	9.6987	10.1271	1042.44	991.288	419.289	285.262	1741.44	653.432	431.854	32.651	1408.94	1155.03	354.307	505.717	453.565	91.098	0	9770.27	89.7497	37.4403	50.145	91.7868	83.3662	273.197	279.38	966.205	911.928	41.7153	196.225	127.245	25.4216	107.626	106.753	0	105.137	197.68	82.2416	25.0935	22.0771	351.242
dme-mir-932	MI0005820	91	25904.3	7.8164	8.8745	7.7755	3.7246	5.3202	6.3811	5.944	6.3593	4961.8	4722.68	362.315	290.597	6199.39	439.872	300.571	285.931	1517.96	1241.27	2965.01	1204.14	1218.8	56.7673	85.0469	2063.93	0.812	0.8279	0.9025	8.1703	3.4258	10.5022	5.4325	264.162	218.198	3.9898	0	0	8.0344	0	16.5082	0	10.3755	10.0584	0.1743	0	0.2614	32.2117
dme-mir-263b	MI0000383	90	18213.5	12.7014	6.7687	3.4896	5.4316	4.8215	17.8455	9.2132	3.2245	1296.59	1985.82	418.676	619.098	1329.66	764.994	901.713	5159.96	124.663	139.862	3265.96	1126.51	1000.31	16.2192	0	486.468	0.406	0.368	0.5415	0.0654	0.2247	2.1004	2.173	4.4774	3.3466	0	0	0	0	29.4936	22.011	206.154	2.5939	0	0	0	0	0
dme-mir-4917	MI0017700	77	129.075	3.5827	2.1559	4.21	3.621	4.4057	9.4099	3.1949	1.9707	0	0	0	0	0	0	0	0	0	0	0	0	0	2.0274	94.4966	0	0	0	0	0	0	0	0	0	0	0	0	0	0	0	0	0	0	0	0	0	0	0
dme-mir-2489	MI0011578	95	92.8789	1.861	0.7019	2.1998	1.2932	3.6576	1.2979	3.1949	2.1496	2.6734	11.5723	3.4506	0	0	0	10.3645	3.9319	0	5.8276	23.8438	5.7812	5.0229	4.0548	0	848.798	5.2779	1.7938	0.9025	3.9543	0.3369	0	5.4326	13.432	3.3466	13.2993	0	6.357	4.3262	0	0	0	2.5939	0	0.8716	0	29.2735	6.0397
dme-mir-4950	MI0017736	92	52.9157	5.583	11.1307	8.4581	0.6725	3.5746	4.3265	3.9379	0.627	0	0	1.1502	0	0	0	0	0.7864	0	11.6551	0	0	0	1.0137	0	108.71	1.218	0.874	0	1.7321	0.646	0	0	2.2387	0	4.6547	0	0	2.4721	0	0	0	5.1877	0	15.8626	23.0448	1.8296	0
dme-mir-1016	MI0005877	58	134.947	0.1396	0.2507	0.1896	0.4138	3.5746	6.2732	0.8173	1.5228	5.3468	5.7861	0	0	11.3646	9.5624	0	0.4719	0	5.8276	8.3775	13.2142	14.5662	0	47.2483	168.437	9.7437	0.8739	2.166	1.9937	1.0952	2.1004	3.2595	0	4.0159	6.6497	0	4.7677	1.236	1.5523	3.6685	0	7.7816	2.0117	1.7431	30.7264	3.3978	0
dme-mir-981	MI0005838	97	86866	8.5606	1.2033	0.2275	0.4139	3.5745	0.649	0.3715	0.1791	14831.9	14309.2	677.472	442.214	19581.2	506.809	870.62	72.9769	10596.4	10530.4	4221.64	5480.58	4728.27	1.0137	0	7174.52	0.406	0.368	1.2635	7.3858	5.0261	2.1004	3.2595	2131.2	2040.08	0	0	0	0	0	0	0	0	0	0	0	0	8.0529
dme-mir-956	MI0005810	148	16576.6	7.7233	4.1113	8.9134	13.2428	3.4083	12.6544	15.6772	19.9736	10.6935	3.4716	2749	3297.65	11.3646	3059.97	2767.33	677.395	256.66	279.723	177.218	95.803	102.466	2926.56	75.5972	750.631	0	0	0.5415	62.6162	53.2661	0	1.0865	2.2387	7.3624	0	25.05	15.8924	0	6.2092	0	0	0	4.0233	0	0	0	2.0132
dme-mir-210	MI0000376	100	217347	1.1631	0.7521	0.4552	0.7242	3.1589	16.0071	10.6249	1.0749	21066.3	27530.7	967.325	981.292	21524.6	583.308	1357.75	7006.55	505.987	588.584	27812.9	49013	58355.5	1.0137	18.8993	2572.78	0.812	0.184	0	1.3073	0.7864	2.1004	10.8651	2.2387	16.0636	2.6599	67.635	14.3032	0	52.7779	62.3644	1580.52	18.157	136.793	0	0	0	13.086
dme-mir-4961	MI0017747	133	52.6709	1.5353	0.8523	2.162	1.8105	2.9926	1.0815	2.8977	2.0601	2.6734	1.1572	2.3004	0	5.6823	0	0	3.932	0	11.6552	3.8666	2.4777	1.5067	2.0274	0	101.767	0.812	0.46	1.444	0.621	0.1685	0	4.3461	2.2387	2.6773	0	0	0	0.618	7.7615	0	0	0	0	0.5229	0	3.9207	0
dme-mir-992	MI0005852	92	14515.5	1.1167	0.6017	1.3275	2.4313	2.9095	2.055	2.0061	5.4636	2.6734	8.1007	408.323	16.8462	0	525.933	31.0936	17.3006	5265.21	8187.74	0.6444	0.8259	2.5114	2.0274	28.349	270.061	0	0	0	0.9479	0.0843	4.2009	1.0865	8.9546	6.6932	0	0	0	0	0	0	0	2.5939	0	0	0	0	6.0397
dme-mir-137	MI0005849	91	4032.91	2.3263	1.2534	1.4033	1.8104	2.8264	1.7305	4.6066	2.3288	278.032	172.428	174.831	117.924	278.433	114.749	82.9161	216.413	300.659	285.551	1308.83	358.434	304.135	21.2877	0	375.458	1.6239	1.5639	0.1805	2.5491	0.6739	0	2.173	4.4773	2.6773	1.33	0	0	0	6.2092	7.337	0	0	4.0233	0.1743	0	0.2614	1.0066
dme-mir-4951	MI0017737	150	255.887	1.768	1.9052	2.3514	1.3967	2.8263	4.002	3.6407	1.3437	13.367	30.0878	21.8538	21.0577	28.4115	9.5624	10.3645	2.0447	36.6656	11.6552	12.244	14.0401	12.808	3.0411	9.4497	132.831	1.218	0	0.1805	0.621	0.1124	2.1004	1.0865	4.4774	0	2.6599	0	0	0.618	12.4183	0	0	7.7816	0	1.2201	38.408	0.2614	1.0066
dme-mir-2501	MI0011590	71	27.6258	0.2792	0.4011	0	0.1552	2.7433	2.3795	0	0.627	0	0	3.4506	0	0	0	10.3645	0	0	5.8276	0.6444	0	0.7534	0	0	91.7925	0.406	0.276	0.1805	0.2942	1.0672	4.2008	1.0865	2.2387	0	1.3299	0	19.0709	1.236	0	0	0	0	0	0.6972	7.6816	0.5228	7.0462
dme-mir-iab-8	MI0005805	68	318.761	3.722	6.6683	3.4895	3.4659	2.7432	4.5426	4.458	5.1951	0	0	56.3601	12.6345	0	57.3744	20.729	47.1833	29.3325	29.1379	3.8665	6.6072	4.0183	17.2329	0	268.843	0	0	0	0.1961	0.0281	0	0	0	0	0	0	0	0	0	0	0	0	0	0	0	0	0
dme-mir-4913	MI0017695	58	50.2884	1.2096	0.9026	2.124	0.4655	2.6601	0.5409	1.2631	0.2687	0	2.3144	0	4.2115	0	0	10.3645	1.8874	7.3331	0	3.8666	6.6071	4.2693	0	0	38.6282	0	0	0	0.0327	0	2.1004	0	0	0	0	0	0	0	0	14.674	0	0	0	0.1743	0	1.0455	0
dme-mir-1009	MI0005870	61	1622.03	2.2797	0.7019	3.0343	3.1037	2.5771	2.1633	1.7089	3.941	122.976	99.5222	29.9054	67.3849	107.964	28.6872	41.458	2.6738	95.3309	145.689	552.92	201.516	105.48	1.0137	0	220.219	0	0.138	0.722	4.1178	0.3932	8.4017	1.0865	13.432	5.3546	0	0	0	0	0	0	0	0	2.0117	0.1743	0	0	20.1324
dme-mir-974	MI0005831	101	630.112	3.4428	0.3008	0.7586	0.3104	2.577	0.2163	0.743	0	2.6734	0	23.0041	0	0	19.1248	0	121.89	197.995	250.585	1.9332	0	0.5023	4.0548	0	20.1804	0	0.092	1.2635	0	0	0	0	4.4774	0	0	0	0	0	0	0	0	0	0	0	0	0	0
dme-mir-955	MI0005807	97	333.518	1.7216	3.3091	1.9344	0.8794	2.4107	5.6241	3.4178	2.2392	29.4072	24.3019	50.6091	12.6346	0	28.6872	41.4581	5.9766	7.3331	0	5.7998	1.6518	0.5022	9.1233	94.4966	14.7669	0	0.184	1.083	0	0	0	0	0	0	0	0	0	0	0	0	0	0	0	0.1743	0	0.2614	0
dme-mir-4985	MI0017771	101	23.4789	2.2332	2.4068	1.0999	0.776	2.3275	1.4061	1.0402	0.8957	2.6734	2.3145	1.1502	0	0	0	0	0.6291	0	0	1.9333	0.8259	0.7534	1.0137	0	0.2866	0	0	0	0	0	0	0	0	0	0	0	0	0	0	0	0	0	0	0	0	0	0
dme-mir-193	MI0005809	108	26559.2	2.0006	0.5515	1.5171	1.2416	2.1614	1.298	2.8234	2.1495	6202.25	6260.65	58.6604	130.558	9137.14	114.749	269.477	105.376	7.3331	34.9655	2276.76	1089.34	856.148	2.0274	0	728.754	4.06	0.966	0.1805	1.6341	2.1622	6.3012	2.173	143.274	141.896	0	0	0	0	0	0	0	5.1877	0	0.5229	0	0.5228	18.1188
dme-mir-4968	MI0017754	155	143.882	1.07	2.2062	2.1619	2.483	2.0782	3.3529	3.2692	4.0306	0	4.6289	5.751	8.423	0	28.6872	0	8.1785	0	11.6552	6.4442	8.2589	7.7854	5.0685	28.349	397.243	10.9618	5.6115	6.3177	1.7975	0.2528	10.5021	15.2112	4.4774	0.6693	18.6189	0	14.3031	3.7082	20.1798	0	0	7.7816	8.0467	14.2938	38.408	27.7053	10.066
dme-mir-2494	MI0011583	117	878.008	1.9541	0.2507	0.7206	0.1552	2.0781	0.4327	2.4519	0.8062	5.3468	1.1572	171.381	353.771	0	76.4993	238.384	15.7278	0	0	3.2221	1.6518	1.0045	1.0137	0	33.9819	1.218	0.092	0.1805	0.0327	0.0843	0	0	0	0	0	0	0	0	0	0	0	0	0	0	0	0	0
dme-mir-958	MI0005812	92	68924.5	5.8623	2.1559	0.6068	4.1901	1.9951	3.2447	8.3958	1.9705	72.1813	62.4907	8993.47	12285.1	28.4115	13884.7	10882.8	267.687	10479.1	10711.1	350.569	76.8074	57.7629	744.058	0	5198.15	0.406	0.092	0.1805	48.3022	40.4338	2.1004	46.7202	42.5345	32.7966	0	0	0	0	0	0	0	0	8.0467	0	0	0	3.0199
dme-mir-3641	MI0016041	69	29.8998	0.1861	0.3008	0.1138	0.1552	1.9951	0.8653	0.8916	0.4479	2.6734	1.1572	5.751	4.2115	0	0	10.3645	0.7864	0	0	0	0	0	0	0	47.7548	0.812	0.046	0	0.3922	0	2.1004	0	0	0	0	0	0	0	0	0	0	0	0	0	0	0.7841	0
dme-mir-309	MI0000421	69	266.293	4.0477	3.5098	7.7755	8.4837	1.8288	3.6773	2.0804	0.8061	155.056	30.0881	0	21.0578	5.6823	0	10.3645	0.4718	0	0	5.7998	3.3036	2.2602	0	0	5222.49	0.406	1.1499	0	0.0654	0.0843	8.4017	21.7304	6.716	704.793	1.3299	0	0	0	6.2092	0	320.685	0	6.035	0.1743	0	0	1.0066
dme-mir-4910	MI0017692	66	44.721	0.0465	0.1504	0.3793	0.0517	1.5795	0.3245	0.2229	0.4479	0	1.1572	0	0	0	0	0	0.3146	0	5.8276	2.5777	0	0.2511	3.0411	28.349	262.9	4.0598	0.046	0.1805	0	0	2.1004	0	0	0	0	0	0	0	0	0	80.1713	5.1877	0	0	7.6816	0.7841	4.0265
dme-mir-133	MI0000362	98	75136.2	4.1873	0.8523	0.3793	0.6724	1.5794	3.6773	5.4981	5.0158	10180.2	8685.05	2586.82	1810.97	13313.6	2658.35	1989.99	2763.68	1627.96	1876.48	7787.92	9698.38	10117.3	8.1096	9.4497	1526.23	0.406	0.092	0	2.8107	2.471	10.5021	21.7303	6.716	14.0557	4.6548	37.575	17.4816	1.2361	45.0164	31.1822	446.669	20.7508	22.1284	0	0	0.2614	23.1523
dme-mir-4942	MI0017728	110	18.1629	1.6749	2.3564	2.693	1.8105	1.4962	1.5143	1.7832	1.6123	0	0	0	0	0	0	0	0.3146	0	0	0	1.6518	1.2557	0	0	15.6921	0	0.092	0	0.1308	0.1966	0	0	0	0	0	0	0	0	3.1046	0	0	0	0	0.3486	0	0.5227	1.0066
dme-mir-4976	MI0017762	103	154.208	2.1867	1.8551	1.7068	0.9828	1.4132	2.2712	1.486	2.0601	2.6734	6.9434	44.8581	4.2115	0	9.5624	0	0.4718	0	29.1379	1.2889	21.473	15.5708	4.0548	0	309.049	0	0.46	0	0.1308	0.0842	4.2009	4.3461	0	0	0	0	0	1.236	0	0	0	0	0	1.3945	0	0	18.1191
dme-mir-4957	MI0017743	84	47.4245	0.4187	0.4011	0.8344	0.9311	1.4132	1.1899	1.7089	1.4331	0	1.1572	0	4.2115	0	0	0	0.1573	0	0	1.2888	1.6518	0.2511	2.0274	28.349	46.0006	0	0.046	0.1805	0.0654	0	0	0	0	0.6693	4.6547	0	0	0	0	0	0	2.5939	0	0.1743	7.6816	0.7841	2.0132
dme-mir-286	MI0000380	100	881.954	12.6549	11.4317	12.4787	16.6572	1.4131	2.9202	2.3776	2.0601	315.459	135.397	11.5021	42.1154	28.4115	9.5624	93.2807	1.2583	58.6652	23.3102	18.044	37.1649	36.6669	9.1233	0	14185.2	8.5257	2.9897	2.5271	9.8369	4.9981	90.3187	102.132	31.3412	1732.87	9.9745	12.525	9.5354	3.7081	38.8073	0	125.984	10.3754	24.14	2.0917	0	3.1364	6.0397
dme-mir-4984	MI0017770	123	23.3513	2.5124	2.4067	2.7688	0.8277	1.3301	1.2978	1.4117	0.627	0	0	0	0	5.6823	0	0	0.7864	0	0	1.9333	0	0.7534	1.0137	0	45.58	0.406	0.5979	1.6245	0.8171	0.1404	0	0	0	0	7.3146	0	9.5354	0.618	0	0	0	10.3754	0	0	0	2.8751	0
dme-mir-4	MI0000122	81	273.999	9.5841	3.4094	5.4997	5.3799	1.33	1.2978	0.743	2.6869	109.609	33.5597	4.6008	8.4231	11.3646	0	10.3645	0.4719	7.3331	11.6551	18.0439	14.0401	10.548	4.0548	0	3890.87	1.218	1.8398	0.361	1.9608	0.5336	12.6025	19.5572	4.4773	503.997	0	0	0	1.236	0	0	57.2652	0	10.0583	0	0	2.6138	7.0464
dme-mir-2535b	MI0017699	71	478.306	5.2108	2.7575	6.0685	2.4314	1.33	2.5959	2.229	1.6123	24.0605	41.6602	13.8024	8.423	51.1407	9.5624	0	1.101	21.9993	40.793	76.6869	75.1557	86.6443	3.0411	0	849.015	6.9019	7.8193	3.971	145.494	45.2633	14.7028	27.1628	4.4774	4.6852	6.6496	20.04	3.1785	0.618	10.866	9.1713	0	10.3755	8.0467	0.6972	0	2.8752	64.4235
dme-mir-4954	MI0017740	91	6.165	0.6979	0.401	1.6689	0.1552	1.33	0.6489	1.2631	0	0	0	0	0	0	0	0	0	0	0	0	0	0	0	0	6.6668	0.406	0.23	0	0.0327	0.0281	0	0	0	0	0	0	0	0	0	0	0	0	0	0	0	0.5228	0
dme-mir-315	MI0000427	84	12419.6	6.5135	0.7521	0.3414	0.3622	1.1638	0.649	0.5944	0.9852	334.173	289.309	14.9527	4.2115	250.021	9.5624	31.0935	164.198	4062.56	2931.27	1736.73	1581.57	972.176	26.3562	0	1244.19	1.624	2.1619	1.6245	7.3858	2.6395	0	2.173	0	3.3466	9.3094	0	11.1247	0	0	0	309.232	2.5939	0	0.1743	0	1.5682	21.139
dme-mir-978	MI0005835	92	4502.34	1.1632	0.1503	0.4931	0.1035	1.0806	0.3245	0.2972	0.0896	5.3468	3.4717	276.05	12.6347	5.6823	152.999	0	19.1878	2148.61	1864.82	1.9332	0.8259	3.0136	4.0548	0	140.255	0.406	0	5.9566	0.2288	0.3931	2.1004	5.4325	8.9547	10.7092	0	0	0	0	0	0	0	0	0	0	0	0	1.0066
dme-mir-967	MI0005823	97	36.5377	0.6514	0.6017	0.4931	0.1035	0.9975	0.5408	1.2631	0.1791	2.6734	8.1005	1.1502	0	0	0	0	1.4155	7.3331	5.8276	1.9333	0	2.2602	1.0137	0	377.64	1.218	0.23	2.5271	1.34	0.7582	21.0042	11.9516	15.6708	15.3944	19.284	37.575	17.4816	16.0686	17.0752	12.8397	0	44.0956	8.0467	0.1743	30.7265	5.4889	0
dme-mir-4943	MI0017729	117	35.3774	2.2332	3.2591	4.0964	3.6212	0.9144	3.3528	1.486	3.5827	5.3468	1.1572	3.4506	0	0	0	0	0.4718	0	0	0	1.6518	0.7534	0	0	168.162	1.624	2.4837	3.4297	8.2683	1.2918	0	5.4325	8.9548	16.0636	2.6598	0	0	0	0	0	0	0	0	1.9174	0	12.8073	0
dme-mir-1007	MI0005868	65	474.364	1.4889	0.1504	0.3792	0.776	0.8313	0.9736	0.9659	1.6122	34.754	23.1447	25.3045	25.2692	11.3646	19.1248	20.729	2.5165	14.6662	23.3103	130.174	72.6779	51.9866	12.1644	0	483.941	12.1796	1.7939	6.1372	26.4061	3.847	27.3056	22.8169	11.1934	3.3466	6.6496	0	0	0.618	0	0	0	2.5939	0	1.3944	15.3632	5.2274	40.2648
dme-mir-303	MI0000409	70	5109.63	0.6979	0.351	1.9723	1.914	0.8313	0.4327	2.6005	1.3437	5.3468	4.6289	117.321	4.2115	5.6823	191.249	10.3645	1.5728	2397.94	2348.51	4.511	4.1294	4.0182	0	0	430.932	0.812	0	0	0.6864	0.1123	14.703	6.5191	17.9094	14.0557	0.665	0	0	0	0	0	0	0	0	0	0	0.2614	20.1323
dme-mir-990	MI0005850	86	1040.62	3.4429	0.2006	1.7826	0.569	0.7482	0.2164	0.5201	0.1791	122.976	123.824	13.8024	0	170.469	9.5624	41.458	12.4248	51.3321	34.9655	119.864	146.182	186.097	0	0	3.8784	0	0	0	0	0	0	0	0	0	0	0	0	0	0	0	0	0	0	0	0	0	0
dme-mir-4983	MI0017769	108	13.8074	0.4187	1.2534	1.1378	0.3104	0.7482	1.5143	0.8916	0.2687	0	1.1572	3.4506	0	0	0	0	0.6291	0	0	0	0	0	2.0274	0	1.5937	0	0	0	0	0	0	0	0	0	0	0	0	0	0	0	0	0	0	0	0	0	0
dme-mir-973	MI0005830	101	2714.12	0.3257	0	0	0	0.7482	0	0.0743	0.0896	2.6734	3.4717	149.527	0	0	114.749	0	16.8288	1253.97	1165.51	0.6444	2.4777	1.0045	2.0274	0	83.2925	0	0	1.9855	0	0	0	2.173	17.9094	5.3546	0	0	0	0	0	0	0	0	0	0	0	0	0
dme-mir-4911	MI0017693	68	6.5517	0.1861	0	0.6448	3.3624	0.7482	0	0.4458	1.1644	0	0	0	0	0	0	0	0	0	0	0	0	0	0	0	6.4262	0	0	0	0	0.0281	0	0	0	0	0	0	0	0	0	0	0	0	0	0	0	0	0
dme-mir-4980	MI0017766	122	6.4546	0.8375	0.9025	0.2655	0.4655	0.7481	0.4327	0.3715	0.0896	0	0	0	0	0	0	0	0.1573	0	0	1.9333	0	0.2511	0	0	5.4058	0.406	0.138	0.1805	0.6537	0.0281	0	0	0	2.008	0	0	0	0	0	0	0	0	0	0	0	0	0
dme-mir-4965	MI0017751	87	6.6896	0.6514	0.2006	0.2275	0.1552	0.6651	0	0.743	0.0896	0	2.3144	0	0	0	0	0	0.3146	0	0	0	0.8259	0.5023	0	0	9.5634	0	0	0	0.0981	0.0562	0	0	0	0	0	0	0	0	0	0	0	0	0	0	0	0.2614	1.0066
dme-mir-976	MI0005833	97	1288.81	1.3493	0.0501	0.3034	0.1552	0.665	0.3246	0.1486	0.1791	2.6734	3.4716	75.9137	0	0	57.3744	0	43.7231	601.318	466.206	5.7998	4.1295	6.7809	18.2466	0	77.9618	0	0	5.4152	0	0	0	0	2.2387	0	0	0	0	0	0	0	0	0	0	0	0	0	0
dme-mir-1001	MI0005863	90	3571.05	0.2792	0.5014	0.6068	0.4656	0.665	0.8653	0.9659	0.5374	561.41	510.341	124.222	92.6541	784.157	152.999	93.2806	32.0847	51.3321	157.345	422.1	344.395	239.842	0	0	68.2469	0	0	0	0	0	0	0	0	1.3386	0	0	0	0	0	0	0	0	0	0	0	0	0
dme-mir-977	MI0005834	99	25765.6	1.4423	0.351	0.3413	0.4138	0.6649	0	0	0.3583	24.0605	25.4592	1932.35	84.2311	11.3646	2514.92	62.1871	48.7561	8601.78	12436	5.7999	1.6518	2.2602	11.1507	0	1409.42	0.812	0.046	23.1049	0.2287	0.0281	2.1004	6.5191	98.5011	66.9319	0	0	0	0	0	0	0	0	0	0.1743	0	0	1.0066
dme-mir-4962	MI0017748	124	13.5101	0.0465	0.2507	0.1516	0	0.6649	0.3245	0.4458	0.0896	0	2.3144	0	0	0	0	0	0.3146	0	5.8276	2.5777	0	0.5022	0	0	43.4159	2.03	0.46	0.9025	0.1308	0.1124	0	0	0	0.6693	5.3197	0	0	0	0	0	0	2.5939	0	0.3486	0	5.4889	0
dme-mir-124	MI0000373	100	608829	6.2809	0.3509	1.0619	1.3968	0.5819	2.7039	1.3374	2.3287	55932.5	91461	11397.4	6578.45	77910.1	10107.5	8250.16	991.163	166910	158726	8569.61	6289.94	5659.52	2.0274	28.349	6357.89	0.812	0.138	0.1805	2.8432	3.2011	16.8035	144.507	141.036	155.952	0	20.04	27.0171	0.618	52.778	36.685	240.514	7.7816	40.2334	0.1743	0	0	1.0066
dme-mir-969	MI0005826	94	561.404	0.2326	0.6016	0.1517	0.2069	0.5819	0.7571	0.2229	0.3583	120.302	101.837	17.2531	8.4231	130.693	9.5624	0	4.2466	0	0	81.1979	38.8166	45.9591	0	0	11.1906	0	0	0	0.719	0.0281	0	0	0	0	0	0	0	0	0	0	0	0	0	0	0	0	0
dme-mir-4970	MI0017756	103	1.9755	0	0.1003	0	0	0.5819	0	0.5944	0.4478	0	0	0	0	0	0	0	0	0	0	0	0	0.2511	0	0	9.5931	1.218	3.0818	0	0.3268	0.1124	0	0	0	0.6693	0	0	0	0	0	0	0	0	0	0	0	0.5228	0
dme-mir-6-3	MI0000126	80	22.1548	2.5899	1.9888	1.5423	3.0864	0.5266	3.0643	0.9907	2.4481	0	4.6289	0	0	0	0	0	0	0	0	1.2888	0	0	0	0	4861.11	0.1353	0.4447	0.1805	1.0677	0.2621	4.2009	13.0382	2.2387	724.204	0	0	0	0	0	0	0	0	0	0	0	0	0
dme-mir-4956	MI0017742	117	40.5473	0.0465	0	0.0759	0	0.4987	0.3246	0.1486	0.6271	0	1.1572	1.1502	0	0	0	0	0	0	5.8276	0	0.8259	0.5023	1.0137	28.349	20.5703	0.812	0	0	0.0327	0.0281	0	0	0	1.3386	0	0	4.7677	0	0	0	0	0	0	0	0	0.5227	2.0132
dme-mir-6-1	MI0000124	82	21.2158	2.5667	2.039	1.5044	3.1381	0.4434	2.7398	1.1764	2.6272	2.6734	1.1572	1.1502	0	0	0	0	0	0	0	0	0	0	0	0	2238.36	0.1353	0.3757	0	1.035	0.2761	14.703	8.6921	2.2387	335.998	0	0	0	0	0	0	0	0	0	0	0	0	0
dme-mir-6-2	MI0000125	74	42.3551	2.5667	1.9387	1.5044	3.0864	0.4434	2.7398	1.0278	2.6272	16.0403	4.6289	0	4.2115	0	0	0	0	0	0	1.2889	0	0.2511	0	0	2364.46	0.1353	0.3757	0	1.035	0.2761	2.1004	15.2112	2.2387	394.898	0	0	0	0	0	0	0	0	0	0	0	0	0
dme-mir-4912	MI0017694	60	1.51	0.0465	0	0.0759	0.1034	0.4156	0.5409	0.1486	0.1791	0	0	0	0	0	0	0	0	0	0	0	0	0	0	0	3.3045	0	0	0	0	0	0	0	0	0	0	0	0	0	0	0	0	0	0	0	0	0	0
dme-mir-2496	MI0011585	118	6.9159	0.1395	0.1002	0.3414	0.6207	0.4155	0.8654	0.3715	0.2688	0	1.1572	1.1502	0	0	0	0	0.1573	0	0	0	0.8259	0.5023	0	0	16.6222	0.406	0	0	0	0	2.1004	0	2.2387	2.6773	0	0	0	0.618	0	0	0	0	0	0.1743	0	0	0
dme-mir-4977	MI0017763	105	44.1134	0.1396	0.6517	0.3034	0.2068	0.3326	0.2164	0.8173	0.4479	0	0	1.1502	12.6345	0	0	10.3645	0.3146	7.3331	5.8276	0.6444	2.4777	0.2511	0	0	15.7036	1.624	0.092	0	0.0654	0	0	1.0865	0	0	1.3299	0	0	0.618	0	0	0	0	0	0.3486	0	0.7842	3.0198
dme-mir-1015	MI0005876	64	806.161	0.6049	0.3008	0.0379	0.1034	0.3325	0	0.3715	0.2687	5.3468	2.3145	186.333	197.943	0	172.124	217.655	5.8194	0	11.6551	0.6444	0	0.2511	4.0548	0	59.0818	0	0.046	0	0.3922	0.0281	0	0	0	0	0	0	0	0	0	0	0	0	0	0	0	0.2614	3.0198
dme-mir-4967	MI0017753	107	7.526	0.4188	0.5514	0.531	0.9829	0.3325	0.8653	1.0402	0.5374	0	0	1.1502	0	0	0	0	0.4719	0	0	0.6444	0	0	0	0	6.0904	0	0.276	0.361	0.1961	0.0562	0	0	0	0	0	0	0	0	0	0	0	0	0	0.6972	0	0.7841	0
dme-mir-957	MI0005811	96	15142.7	0.4187	0.1002	0.0758	0.1552	0.3325	2.0549	2.3776	0.3583	1050.64	1285.69	363.465	248.482	1244.42	172.124	259.113	1280.87	212.662	215.62	2626.69	3709.05	2466.98	1.0137	0	561.965	0.406	0.092	0	4.2159	1.8533	0	0	0	0	0	0	3.1785	0	4.6569	0	412.31	0	36.21	0	0	0	0
dme-mir-2498	MI0011587	112	503.666	0.2325	0.0501	0.1138	0.4656	0.3325	0.5409	0.2229	0.9853	0	1.1572	18.4033	0	0	9.5624	0	1.2583	219.994	244.758	0.6444	1.6518	0.2511	3.0411	0	39.375	0	0	0.1805	0.6209	0.0281	0	0	0	0	0	0	0	0	0	0	0	0	0	0	0	0	0
dme-mir-4915	MI0017697	118	2.5317	0.1861	0	0.0379	0.0517	0.3325	0	0.0743	0.4479	0	0	1.1502	0	0	0	0	0	0	0	0	0	0.2511	0	0	6.553	0	0	0	0	0	0	0	0	0	0	0	0	0	0	0	0	0	0	0	0	0	0
dme-mir-4987	MI0017773	132	16.9181	0.0931	0.6517	0.1138	0.0517	0.3325	1.0816	0.2229	0	0	0	0	0	0	0	0	0.3146	7.3331	5.8276	0.6444	0	0.2511	0	0	24.74	0.812	1.1039	0.361	0.3269	0.0843	0	0	0	0	1.33	0	0	0	0	5.5027	0	0	0	0	0	1.3069	0
dme-mir-4972	MI0017758	107	5.3266	0.0465	0.0501	0.2276	0	0.3325	0	0.4458	0	0	0	1.1502	0	0	0	0	0.1573	0	0	0	1.6518	0.2511	1.0137	0	3.2381	0	0	0	0	0.0281	0	0	2.2387	0	0	0	0	0	0	0	0	0	0	0	0	0	0
dme-mir-2492	MI0011581	76	1.8633	0.0931	0.0501	0	0.2068	0.3324	0.1082	0.4458	0.6269	0	0	0	0	0	0	0	0	0	0	0	0	0	0	0	4.3933	0.406	0.046	0.1805	0.0654	0	0	1.0865	0	0	0	0	0	0.618	0	0	0	0	0	0	0	0	0
dme-mir-4914	MI0017696	94	11.9687	0.0465	0	0.0379	0	0.3324	0.7572	0.4458	0.0896	2.6734	0	1.1502	0	5.6823	0	0	0	0	0	0	0	0.7534	0	0	8.7399	0	0	0	0	0.0281	0	1.0865	0	1.3386	0	0	0	0	0	0	0	0	0	0	0	0	2.0132
dme-mir-993	MI0005854	119	18220.5	1.3492	0	0.3033	0.2587	0.2494	0.4326	0.6687	0.2687	1007.87	1029.94	2668.48	905.484	750.065	2055.93	1088.27	105.533	2867.26	3467.4	875.133	718.52	677.083	0	0	913.968	0.406	0.092	0	1.6341	1.5444	0	9.7786	2.2387	0	0	0	0	0	0	0	0	0	0	0	0	0	0
dme-mir-2283	MI0011293	76	5.6792	0.884	0.4011	1.1378	0.1034	0.2494	0.8653	0.8916	0	0	0	0	0	0	0	0	0	0	0	0.6444	0	0.5022	0	0	48.8347	0.812	0.138	0.722	0.1962	0.1404	0	0	0	0	0	0	7.9462	0	0	0	0	10.3754	0	0	0	2.6137	0
dme-mir-2497	MI0011586	96	43.7671	0.2792	0.1003	0	0.3104	0.2494	0.4326	0	0.7166	2.6734	3.4717	0	4.2115	0	0	10.3645	0.3146	0	0	12.244	4.1295	4.2694	0	0	278.822	0	0.23	1.2635	0.3595	0	6.3013	14.1247	42.5345	38.8206	0.665	0	12.7139	0	3.1046	0	0	0	10.0583	0	0	1.8296	6.0397
dme-mir-2499	MI0011588	96	481.871	0.1396	0.1504	0	0.0517	0.2494	0	0	0	0	1.1572	9.2016	4.2115	0	9.5624	0	0.7864	139.33	314.689	0	0.8259	0.5023	1.0137	0	19.0153	0	0	0.9025	0.0327	0	0	0	2.2387	0	0	0	0	0	0	0	0	0	0	0	0	0	0
dme-mir-979	MI0005836	95	263.91	0.093	0	0	0.0517	0.2494	0	0	0.0896	0	0	18.4032	0	0	19.1248	0	9.2795	102.664	110.724	0	2.4777	0.7533	0	0	18.6332	0	0	1.9855	0.0654	0	0	0	0	0	0	0	0	0	0	0	0	0	0	0	0	0	0
dme-mir-1017	MI0005878	71	5997.94	0.0465	0	0.0379	0	0.2494	47.6962	0.1486	0	1136.19	764.934	73.6133	33.6923	1835.38	143.436	41.458	8.8075	344.658	390.447	347.992	445.152	383.999	0	0	119.934	0	0	0	0.0654	0.0843	0	3.2595	0	4.0159	1.3299	0	14.3032	0	10.866	0	0	0	0	0	0	0	0
dme-mir-3642	MI0016042	76	3.3712	0.0465	0.1003	0	0.0517	0.2494	0.3246	0.5201	0.2688	0	0	1.1502	0	0	0	0	0.1573	0	0	0	0	0.5023	0	0	16.7885	0	0.046	0.1805	0.1635	0	0	4.3461	2.2387	0	0	0	0	0	0	0	0	0	0	0	0	0.2614	0
dme-mir-4974	MI0017760	102	4.4327	0.0465	0.0501	0.0379	0.0517	0.2494	0.1082	0.1486	0.5374	0	1.1572	1.1502	0	0	0	0	0	0	0	0.6444	0	0.2511	0	0	7.0537	0	0.046	0.1805	0.6863	0.1404	0	0	0	0	0	0	0	0	0	0	0	0	0	0.1743	0	0.2614	2.0132
dme-mir-4960	MI0017746	101	47.2461	0.1861	0	0	0.0517	0.1663	0.1082	0.0743	0	2.6734	6.9434	0	0	17.0469	0	0	1.4156	0	11.6551	1.2889	4.1294	1.5068	0	0	18.5655	0	0	0	0.0981	0.0281	2.1004	0	0	0	0	0	0	0	0	0	0	0	0	0	0	0	1.0066
dme-mir-4971	MI0017757	111	10.5618	0.0465	0.2005	0.1137	0	0.1663	0.2164	0.2229	0.0896	2.6734	0	1.1502	0	5.6823	0	0	0	0	0	0	0	0	0	0	20.6144	1.218	0.046	0	0	0.0562	0	0	2.2387	0	0	0	0	0	0	0	0	0	0	0	0	0	1.0066
dme-mir-4952	MI0017738	126	71.9005	0.0931	0.4512	0.1138	0.2586	0.1662	0.1082	0.5201	0.1791	2.6734	10.415	2.3004	0	0	0	0	0.7865	7.3331	0	3.8666	8.2589	6.0273	0	28.349	43.7541	0	0.092	0	0.2942	0.1685	0	0	8.9547	8.0318	0.665	0	0	1.236	3.1046	0	0	0	0	0	0	0	0
dme-mir-iab-4	MI0000432	68	1776.77	0.884	0.8022	1.6309	1.1381	0.0831	0.2163	0.2229	2.4183	16.0403	6.9434	147.227	101.077	28.4115	191.248	114.01	0.4719	571.986	547.792	15.4663	14.8659	10.7991	3.0411	0	107.896	0	0	0	0.3268	0.1965	0	1.0865	2.2387	7.3625	0	0	0	0	0	0	0	0	0	0	0	0	2.0132
dme-mir-2500	MI0011589	68	74.7779	0.3256	0	0.2276	0	0.0831	0.2164	0.2229	0.0896	10.6936	11.5722	3.4506	8.423	5.6823	19.1248	0	0	14.6662	0	0	0	0	0	0	173.41	0.812	0.322	0.1805	0.9152	0.1685	6.3012	7.6056	6.7161	17.4022	1.3299	0	12.7139	1.236	9.3138	0	0	5.1877	10.0583	1.7431	7.6816	3.1365	12.0794
dme-mir-968	MI0005825	92	64.7232	0.2326	0.0501	0.0759	5.0178	0.0831	0	0.3715	2.2392	10.6935	20.8303	0	4.2115	5.6823	0	0	1.5728	0	0	5.7998	6.6071	1.2557	0	0	56.3417	0.406	0.23	0	0.2615	0.1123	0	0	0	4.0159	0	0	0	0	0	0	0	0	0	0.5229	0	0	0
dme-mir-3645	MI0016045	137	17.0119	0.0465	0.1504	0.1138	0.2068	0.0831	0.4328	0	0.1792	0	3.4716	0	0	0	9.5624	0	0.4719	0	0	1.2889	0	1.0045	0	0	37.521	0.406	0	0	0.0327	0.0281	2.1004	4.3461	0	0	0	0	0	0	3.1046	0	0	12.9693	0	0.1743	0	1.0456	0
dme-mir-975	MI0005832	91	3810.05	0.0465	0	0	0	0.0831	0.1082	0.0743	0	5.3468	4.6289	219.69	0	0	248.623	10.3645	1.1011	1847.95	1468.55	0.6444	0.8259	1.0045	1.0137	0	186.787	0	0	0.722	0	0	0	0	6.716	13.3863	0	0	0	0	0	0	0	0	0	0	0	0	0
dme-mir-4909	MI0017704	60	5.3246	0	0.4011	0	0.1034	0.0831	0.1082	0.1486	0.2687	0	0	0	4.2115	0	0	0	0	0	0	0	0	0	0	0	0.2287	0	0	0	0	0	0	0	0	0	0	0	0	0	0	0	0	0	0	0	0	0	0
dme-mir-4947	MI0017733	100	25.7712	0	0	0.0759	0	0.0831	0	0.2229	0	0	2.3144	1.1502	0	0	0	0	0.1573	0	0	1.2889	0.8259	0.7533	0	18.8993	0.4893	0	0	0	0	0.0562	0	0	0	0	0	0	0	0	0	0	0	0	0	0	0	0	0
dme-mir-4953	MI0017739	93	0.3342	0	0	0	0	0.0831	0	0	0	0	0	0	0	0	0	0	0	0	0	0	0	0.2511	0	0	5.2259	0.406	0.276	0.361	0.2615	0.1685	0	0	2.2387	0	0	0	0	0	0	0	0	0	0	0	0	0.2614	0
dme-mir-972	MI0005829	91	1102.47	0	0	0.0379	0	0.0831	0	0	0	0	1.1572	105.819	4.2115	0	57.3745	0	2.3592	593.985	332.171	1.9333	0.8259	2.5114	0	0	38.5991	0	0	1.083	0	0	0	2.173	0	4.6852	0	0	0	0	0	0	0	0	0	0	0	0	1.0066
dme-mir-4966	MI0017752	127	1788.84	0.4653	0	0.0379	0.1552	0	0	0	0.0896	0	0	140.325	0	0	105.187	0	4.4037	821.312	705.137	1.2889	0.8259	1.5068	8.1096	0	67.4572	0	0	2.7076	0.1308	0.1685	0	0	11.1933	3.3466	0	0	0	0	0	0	0	0	0	0	0	0	0
dme-mir-927	MI0005843	92	17407.4	0.2326	0.1503	0	0	0	0	0.2229	0.2688	2454.17	2668.59	161.029	160.038	3790.1	219.936	196.926	46.7114	476.655	664.343	2551.29	2255.49	1761.27	0	0	689.718	1.218	0	0	0.6863	2.1622	0	0	2.2387	15.3943	0	0	7.9462	0	0	9.1713	217.608	0	0	0	0	0	27.1787
dme-mir-1004	MI0005865	68	2969.67	0.1861	0	0	0	0	0	0.3715	0.0896	569.431	486.039	88.566	58.9616	698.923	172.123	51.8226	14.9415	117.33	262.24	134.041	159.396	155.207	0	0	30.3125	0	0	0.1805	0.0654	0.0842	0	0	0	0	0	0	0	0	0	0	0	0	0	0	0	0	0
dme-mir-219	MI0000358	100	12508.5	0.1861	0.0501	0	0.0517	0	0	0.0743	0	1815.23	2166.35	269.149	214.789	2943.43	535.496	217.655	6.2912	234.661	332.172	1649.74	1122.38	1000.81	0	0	231.802	0.406	0.046	0	0.2942	0.2246	0	4.3461	0	0	0	0	0	0	0	0	0	0	0	0	0	0	2.0132
dme-mir-4964	MI0017750	112	9.904	0.186	0.0501	0.1517	0.1034	0	0.1082	0	0.1792	0	0	1.1502	4.2115	0	0	0	0	0	0	1.9333	0.8259	1.0045	0	0	8.3668	1.218	0	0	0.1307	0.0281	0	0	0	0	0	0	0	0.618	0	0	0	0	0	0.1743	0	0.2614	3.0198
dme-mir-4963	MI0017749	109	5.1284	0.1396	0.702	0.7586	0.6725	0	0.4327	0.5944	0.3583	0	0	0	0	0	0	0	0	0	0	0.6444	0.8259	0	0	0	17.6034	0.406	0	0	0	0	0	0	0	0	0	0	0	0	0	0	0	0	0	0	0	0	3.0198
dme-mir-2490	MI0011579	75	26.4289	0.0931	0	0	0.1034	0	0	0	0	0	0	0	0	0	0	0	0	7.3331	0	0	0	0	0	18.8993	17.9635	0	0.046	0.1805	0.1307	0	0	0	0	0.6693	0	0	0	0	0	0	0	0	0	0	0	0	0
dme-mir-4959	MI0017745	118	13.3884	0.0931	0.0501	0.0758	0.1035	0	0	0.0743	0.1792	0	1.1572	0	0	0	0	0	0	0	11.6552	0	0	0	0	0	178.901	0	0	0	0	0	42.0087	29.3359	0	0	0	0	0	0	0	0	0	0	0	0	7.6816	0	0
dme-mir-4975	MI0017761	111	35.6706	0.0931	0.0501	0	0	0	0	0.2229	0.0896	0	0	2.3004	0	5.6823	9.5624	0	0.4719	0	0	1.9332	3.3036	2.5114	0	9.4497	8.9393	0	0	0	0	0	0	0	0	0	0	0	0	0	0	0	0	0	0	0	0	0	1.0066
dme-mir-4945	MI0017731	115	6.3041	0.093	0.1002	0.0379	0	0	0.2164	0	0.2687	0	0	0	0	0	0	0	0.3146	0	0	1.2888	2.4777	1.5068	0	0	0	0	0	0	0	0	0	0	0	0	0	0	0	0	0	0	0	0	0	0	0	0	0
dme-mir-1011	MI0005872	54	23.5088	0.0465	0	0	0	0	0	0	0	5.3468	0	0	0	0	0	0	1.1009	7.3331	0	3.8666	3.3035	2.5114	0	0	1.4375	0	0	0	0	0	0	0	0	0	0	0	0	0	0	0	0	0	0	0	0	0	0
dme-mir-2491	MI0011580	144	31.0757	0.0465	0.0501	0.0759	0	0	0.1082	0	0	0	1.1572	0	0	0	0	0	0	0	0	1.2888	0	0	0	28.349	70.6711	2.03	0	3.0686	0	0	2.1004	1.0865	6.716	12.7172	0	0	0	0	4.6569	0	0	0	0	0	7.6816	0.2614	0
dme-mir-307b	MI0011577	120	71.1546	0.0465	0.0501	0.0759	0	0	0	0.1486	0.0896	21.3871	3.4717	12.6523	4.2115	0	0	20.729	1.2582	0	0	0.6444	4.1295	2.2602	0	0	53.2584	0	0.092	0	0.0327	0	2.1004	1.0865	0	2.008	4.6547	0	14.3032	0	0	0	0	0	0	1.0458	0	0	0
dme-mir-3643	MI0016043	68	27.6598	0.0465	0	0	0.0517	0	0	0	0.1791	0	0	0	0	0	0	20.729	0	0	5.8276	0	0.8259	0	0	0	16.5298	0	0	0	0.1634	0	0	2.173	0	0	0	0	0	0	0	0	0	0	0	0	0	0	0
dme-mir-4948	MI0017734	106	1.3566	0.0465	0.0501	0.4172	0.5174	0	0	0.0743	0	0	0	0	0	0	0	0	0	0	0	0	0	0.2511	0	0	50.3249	0.406	0.368	0.361	0.6535	0.702	2.1004	5.4325	0	0	0	0	0	1.2361	0	0	0	7.7816	0	0	0	0.7842	5.0331
dme-mir-4978	MI0017764	147	0.7999	0.0465	0	0	0	0	0	0	0	0	0	0	0	0	0	0	0	0	0	0	0	0.7534	0	0	3.3454	2.03	0	0	0.0327	0.1124	0	0	0	0	0	0	0	0	0	0	0	0	0	0.1743	0	0	0
dme-mir-1002	MI0005824	89	30.5253	0	0	0	0	0	0	0	0	8.0201	6.9433	0	0	0	0	10.3645	0.3146	0	0	0	4.1294	0.7534	0	0	7.2184	0	0.046	0	0.0327	0	0	0	0	3.3466	0	0	0	0	0	0	0	0	0	0	0	0	0
dme-mir-2280	MI0011290	115	19.0965	0	0	0	0	0	0.1082	0	0	0	0	0	0	0	0	0	0	7.3331	11.6552	0	0	0	0	0	17.2107	0	0	0	0	0	0	0	0	0	0	0	0	0	0	0	0	0	0	0	0	0	7.0463
dme-mir-2281	MI0011291	103	1.0137	0	0	0	0	0	0	0	0	0	0	0	0	0	0	0	0	0	0	0	0	0	1.0137	0	18.9269	0	0	0	0	0	0	0	0	0.6693	0	0	0	0	0	0	0	0	0	0	0	0	3.0198
dme-mir-2282	MI0011292	107	2.9762	0	0	0	0.0517	0	0	0	0	2.6734	0	0	0	0	0	0	0	0	0	0	0	0.2511	0	0	59.3347	1.218	0.276	0.1805	0.8497	0.4493	2.1004	4.3461	6.716	3.3465	0	0	0	0	0	0	0	0	0	0	0	0	1.0066
dme-mir-2493	MI0011582	106	15.8304	0	0.1003	0	0	0	0.3245	0	0	0	5.7861	3.4506	0	0	0	0	0	0	0	1.9332	2.4777	1.758	0	0	120.534	2.842	0.276	0.722	1.8956	0.1966	18.9038	14.1247	11.1933	3.3465	0	0	14.3032	0	0	3.6685	0	0	0	0	0	2.6138	0
dme-mir-2495	MI0011584	115	7.6542	0	0	0	0	0	0	0	0	5.3468	1.1572	1.1502	0	0	0	0	0	0	0	0	0	0	0	0	0.454	0	0	0	0	0	0	0	0	0	0	0	0	0	0	0	0	0	0	0	0	0	0
dme-mir-280	MI0000365	95	0	0	0	0	0	0	0	0	0	0	0	0	0	0	0	0	0	0	0	0	0	0	0	0	0	0	0	0	0	0	0	0	0	0	0	0	0	0	0	0	0	0	0	0	0	0	0
dme-mir-285	MI0000377	99	111368	0	0	0	0.0517	0	0.1082	0.3715	0.7165	41119.3	25541.4	371.517	703.33	32502.7	611.995	1036.45	379.826	65.9984	198.137	3072.64	3100.38	2661.37	2.0274	0	1109.01	0	0.046	0	0.0654	0.1405	0	16.2977	0	55.5535	0	0	0	0	7.7615	23.8452	57.2652	2.5939	10.0583	0	0	0	56.3707
dme-mir-287	MI0000381	93	5.6823	0	0	0	0	0	0	0	0	0	0	0	0	5.6823	0	0	0	0	0	0	0	0	0	0	1.9573	0	0	0	0	0	0	0	0	1.3386	0	0	0	0	0	0	0	0	0	0	0	0	0
dme-mir-288	MI0000384	97	6.8395	0	0	0	0	0	0	0	0	0	1.1572	0	0	5.6823	0	0	0	0	0	0	0	0	0	0	0	0	0	0	0	0	0	0	0	0	0	0	0	0	0	0	0	0	0	0	0	0	0
dme-mir-289	MI0000385	99	0	0	0	0	0	0	0	0	0	0	0	0	0	0	0	0	0	0	0	0	0	0	0	0	0	0	0	0	0	0	0	0	0	0	0	0	0	0	0	0	0	0	0	0	0	0	0
dme-mir-3644	MI0016044	61	0.9698	0	0	0	0	0	0	0.0743	0	0	0	0	0	0	0	0	0	0	0	0.6444	0	0.2511	0	0	14.5826	0	0	0	0.0327	0	0	0	0	0	0	0	0	0	0	0	0	0	0	0	0	0	2.0132
dme-mir-4908	MI0017703	59	0.1573	0	0	0	0	0	0	0	0	0	0	0	0	0	0	0	0.1573	0	0	0	0	0	0	0	0.2457	0	0	0	0	0	0	0	0	0	0	0	0	0	0	0	0	0	0	0	0	0	0
dme-mir-4916	MI0017698	59	2.5975	0	0	0	0	0	0	0.0743	0	0	0	0	0	0	0	0	0.1573	0	0	1.2889	0.8259	0.2511	0	0	1.6941	0	0	0	0.2288	0	0	0	0	0	0	0	0	0	0	0	0	0	0	0	0	0	0
dme-mir-4918	MI0017701	55	12.0955	0	0	0	0	0	0.1082	0	0.1792	2.6734	1.1572	0	0	0	0	0	0	7.3331	0	0.6444	0	0	0	0	31.698	0	0	0	0.196	0	6.3013	6.5191	2.2387	2.0079	0	0	0	0	0	0	0	0	0	0	0	0	0
dme-mir-4939	MI0017725	109	4.3755	0	0	0	0	0	0	0	0	0	0	2.3004	0	0	0	0	1.5728	0	0	0	0	0.5023	0	0	0	0	0	0	0	0	0	0	0	0	0	0	0	0	0	0	0	0	0	0	0	0	0
dme-mir-4940	MI0017726	105	31.7603	0	0	0	0	0	0	0	0	0	2.3144	2.3004	0	0	0	0	0.6291	21.9994	0	1.9332	0.8259	1.7579	0	0	1.4741	0	0	0	0	0	0	0	0	0	0	0	0	0	0	0	0	0	0	0	0	0	0
dme-mir-4941	MI0017727	103	1.1572	0	0	0	0	0	0	0	0	0	1.1572	0	0	0	0	0	0	0	0	0	0	0	0	0	27.3189	2.03	0.184	0	0.2615	0.4775	8.4017	1.0865	0	0	0	0	0	0.618	0	0	0	7.7816	0	1.2201	0	0.2614	0
dme-mir-4944	MI0017730	129	0.5022	0	0	0	0	0	0	0	0	0	0	0	0	0	0	0	0	0	0	0	0	0.5022	0	0	0	0	0	0	0	0	0	0	0	0	0	0	0	0	0	0	0	0	0	0	0	0	0
dme-mir-4946	MI0017732	116	0	0	0	0	0	0	0	0	0	0	0	0	0	0	0	0	0	0	0	0	0	0	0	0	0	0	0	0	0	0	0	0	0	0	0	0	0	0	0	0	0	0	0	0	0	0	0
dme-mir-4955	MI0017741	169	64.7735	0	0.0501	0.0379	0.1034	0	0	0	0	2.6734	3.4716	10.3518	4.2115	5.6823	0	10.3645	0	21.9994	5.8276	0	0	0	0	0	268.371	0	0	0	0	0	2.1004	2.173	35.8188	22.0875	0	0	0	0	0	0	0	0	0	0	0	0	5.033
dme-mir-4958	MI0017744	134	55.7398	0	0	0.0379	0	0	0	0	0	0	4.6289	1.1502	0	0	0	20.729	0.3146	7.3331	17.4828	0.6444	1.6518	0.7534	1.0137	0	10.473	0.812	0.046	0.1805	0.0654	0.0281	0	0	0	0	0	0	0	0	0	0	0	0	0	0	7.6816	0	0
dme-mir-4973	MI0017759	151	28.4561	0	0	0	0	0	0	0	0	0	4.6289	0	0	17.0469	0	0	0	0	0	1.2889	2.4777	3.0137	0	0	0	0	0	0	0	0	0	0	0	0	0	0	0	0	0	0	0	0	0	0	0	0	0
dme-mir-4979	MI0017765	109	9.1435	0	0	0	0	0	0	0	0	0	2.3145	0	0	5.6823	0	0	0	0	0	0.6444	0	0.5023	0	0	6.6501	0	0	0	0	0	0	1.0865	0	0	0	0	0	0	0	0	0	0	0	0	0	0	0
dme-mir-4981	MI0017767	95	15.8499	0	0	0	0	0	0.1082	0.2229	0.0896	0	0	4.6008	0	5.6823	0	0	1.4156	0	0	0.6444	0.8259	2.2602	0	0	0.3592	0	0	0	0	0	0	0	0	0	0	0	0	0	0	0	0	0	0	0	0	0	0
dme-mir-4982	MI0017768	119	5.9301	0	0	0	0	0	0	0	0	2.6734	1.1572	0	0	0	0	0	0.6292	0	0	0.6444	0.8259	0	0	0	0	0	0	0	0	0	0	0	0	0	0	0	0	0	0	0	0	0	0	0	0	0	0
dme-mir-4986	MI0017772	122	3.915	0	0.0501	0	0	0	0	0	0.2687	0	1.1572	1.1502	0	0	0	0	0	0	0	1.2888	0	0	0	0	0	0	0	0	0	0	0	0	0	0	0	0	0	0	0	0	0	0	0	0	0	0	0
dme-mir-971	MI0005828	96	1582.91	0	0	0	0.0517	0	0	0	0.0896	195.157	112.252	19.5535	25.2693	147.74	57.3745	10.3645	0.9437	395.99	244.759	136.619	116.45	120.297	0	0	148.489	1.218	0	0	0.9804	0.5054	0	1.0865	78.3532	30.7887	0	0	0	0	0	0	0	0	0	0	0	0	0
dme-mir-985	MI0005844	86	2176.25	0	0	0	0.0517	0	0	0	0	0	0	147.226	0	0	162.561	0	18.087	901.978	938.239	0	0	0	8.1096	0	54.9702	0	0	0	0	0	0	0	0	0	0	0	0	0	0	0	0	0	0	0	0	0	0
dme-mir-997	MI0005859	215	2465.43	0	0	0	0.0517	0	0	0	0	0	2.3145	184.033	4.2115	0	210.374	10.3645	2.3594	916.644	1124.72	1.9333	0.8259	0.5023	7.0959	0	57.174	0	0	0	0	0	0	0	0	0	0	0	0	0	0	0	0	0	0	0	0	0	0
[truncated: 40 more columns]
