# Supplementary material
Source: HighWire-hosted journal article supplement (doi:10.1101/rna.049098.114)
Supplement: TableS4_mammalian_rRNA_miRNA.xlsx [file TableS4_mammalian_rRNA_miRNA.xlsx]

## Sheet: mmu-mir-696
key	start0based	stop1based	mmu-mir-696	sequencelength	sequence	sumcount	sumnormRPMmirpre	Average (RPM normalized by miRNA mapping reads)	SRR640602.GSM1057530: ES_NI; Mus musculus; RNA-Seq	SRR640603.GSM1057531: ES_EMCV 3hrs; Mus musculus; RNA-Seq	SRR640604.GSM1057532: ES_EMCV 6hrs; Mus musculus; RNA-Seq	SRR640605.GSM1057533: ES_D0 INF; Mus musculus; RNA-Seq	SRR640606.GSM1057534: ES_D10 NI; Mus musculus; RNA-Seq	SRR640607.GSM1057535: ES_D10 INF; Mus musculus; RNA-Seq	SRR640612.GSM1057540: IP_mAGO2_INF; Mus musculus; RNA-Seq	SRR640614.GSM1057542: ES_NoV; Mus musculus; RNA-Seq	SRR640615.GSM1057543: ES_NoVÃ«Ã“B2; Mus musculus; RNA-Seq	SRR037904.GSM510440: brain_rep1	SRR037905.GSM510441: brain_rep2	SRR037906.GSM510442: brain_rep3	SRR037907.GSM510443: brain_rep4	SRR037919.GSM510457: e12p5_rep1	SRR037920.GSM510458: e12p5_rep2	SRR037921.GSM510459: e12p5_rep3	SRR037922.GSM510460: e12p5_rep4	SRR037923.GSM510461: e9p5_rep1	SRR037924.GSM510462: e9p5_rep2	SRR037925.GSM510463: e9p5_rep3	SRR037926.GSM510464: e9p5_rep4	SRR037927.GSM510465: e7p5_rep1	SRR037928.GSM510466: e7p5_rep2	SRR037929.GSM510467: e7p5_rep3	SRR037930.GSM510468: e7p5_rep4	SRR038741.GSM527276: DGCR8_wt_hippocampus	SRR038744.GSM527279: DGCR8_wt_cortex	SRR039610.GSM527274: DICER_wt_hippocampus	SRR040488.GSM533911: E18.5 wild type LIVER small RNA	SRR042477.GSM539869: mouse brain tissue [09-002]	SRR042482.GSM539874: mouse skin tissue [09-002]	SRR069834.GSM304914: Analysis of small RNAs in murine neutrophils cultured in vitro by Solexa/Illumina genome analyzer	SRR206939.GSM723280: NAc_saline_smallRNA	SRR206940.GSM723281: NAc_cocaine_smallRNA	SRR206941.GSM723282: PSD_saline_smallRNA	SRR206942.GSM723283: PSD_cocaine_smallRNA	SRR306526.GSM750569: Cerebellum_1	SRR306527.GSM750570: Cerebellum_2	SRR306528.GSM750571: Cerebellum_3	SRR306529.GSM750572: Purkinje_1	SRR306530.GSM750573: Purkinje_2
key	start0based	stop1based	GGTCTGTCGCGGTGCCTGAAGCTGTCCCCGAGCCACGCTTCCTGCTTTCCCGGGCTTGCTGCTTGCGTGTGCTTGCTGTGGGCAGCTT	sequencelength	sequence	sumcount	sumnormRPMmirpre	average normRPMmirpre	SRR640602.NormRPMmirpre	SRR640603.NormRPMmirpre	SRR640604.NormRPMmirpre	SRR640605.NormRPMmirpre	SRR640606.NormRPMmirpre	SRR640607.NormRPMmirpre	SRR640612.NormRPMmirpre	SRR640614.NormRPMmirpre	SRR640615.NormRPMmirpre	SRR037904.NormRPMmirpre	SRR037905.NormRPMmirpre	SRR037906.NormRPMmirpre	SRR037907.NormRPMmirpre	SRR037919.NormRPMmirpre	SRR037920.NormRPMmirpre	SRR037921.NormRPMmirpre	SRR037922.NormRPMmirpre	SRR037923.NormRPMmirpre	SRR037924.NormRPMmirpre	SRR037925.NormRPMmirpre	SRR037926.NormRPMmirpre	SRR037927.NormRPMmirpre	SRR037928.NormRPMmirpre	SRR037929.NormRPMmirpre	SRR037930.NormRPMmirpre	SRR038741.NormRPMmirpre	SRR038744.NormRPMmirpre	SRR039610.NormRPMmirpre	SRR040488.NormRPMmirpre	SRR042477.NormRPMmirpre	SRR042482.NormRPMmirpre	SRR069834.NormRPMmirpre	SRR206939.NormRPMmirpre	SRR206940.NormRPMmirpre	SRR206941.NormRPMmirpre	SRR206942.NormRPMmirpre	SRR306526.NormRPMmirpre	SRR306527.NormRPMmirpre	SRR306528.NormRPMmirpre	SRR306529.NormRPMmirpre	SRR306530.NormRPMmirpre
mmu-mir-696_1_31_+	1	31	.GTCTGTCGCGGTGCCTGAAGCTGTCCCCGA.........................................................	30	GTCTGTCGCGGTGCCTGAAGCTGTCCCCGA	156	8.651	0.0882755	1.1524	2.4206	2.837	1.2927	0	0.1223	0.3374	0.0469	0.4417	0	0	0	0	0	0	0	0	0	0	0	0	0	0	0	0	0	0	0	0	0	0	0	0	0	0	0	0	0	0	0	0
mmu-mir-696_4_33_+	4	33	....TGTCGCGGTGCCTGAAGCTGTCCCCGAGC.......................................................	29	TGTCGCGGTGCCTGAAGCTGTCCCCGAGC	138	7.954	0.0811633	2.1229	3.0134	1.4802	0.2155	0	0.1835	0.1125	0.1875	0.0982	0	0	0	0	0	0	0	0	0	0	0	0	0	0	0	0	0	0	0	0.3615	0	0	0	0	0	0	0	0	0	0	0	0
mmu-mir-696_3_21_+	3	21	...CTGTCGCGGTGCCTGAAG...................................................................	18	CTGTCGCGGTGCCTGAAG	121	6.677	0.0681327	0.3033	1.3338	1.8502	0.9695	0.6098	0.5505	0.2812	0.3282	0.2454	0	0	0	0	0	0	0	0	0	0	0	0	0	0	0	0	0	0	0	0	0	0	0	0	0	0	0	0	0	0	0	0
mmu-mir-696_3_25_+	3	25	...CTGTCGCGGTGCCTGAAGCTGT...............................................................	22	CTGTCGCGGTGCCTGAAGCTGT	110	7.2259	0.0737337	0.9098	0.5928	1.6652	0.4309	0.2346	0.734	0.0562	0.4219	0.5889	0	0	0	0	0	0	0	0	0	0	0	0	0	0.8775	0	0	0	0	0	0	0	0	0	0	0	0	0	0	0	0	0	0
mmu-mir-696_3_26_+	3	26	...CTGTCGCGGTGCCTGAAGCTGTC..............................................................	23	CTGTCGCGGTGCCTGAAGCTGTC	75	4.1572	0.0424204	1.2737	1.235	0.6167	0.4309	0.0469	0.3058	0.0562	0.0938	0.0982	0	0	0	0	0	0	0	0	0	0	0	0	0	0	0	0	0	0	0	0	0	0	0	0	0	0	0	0	0	0	0	0
mmu-mir-696_4_27_+	4	27	....TGTCGCGGTGCCTGAAGCTGTCC.............................................................	23	TGTCGCGGTGCCTGAAGCTGTCC	69	3.7021	0.0377765	0.6672	1.6302	0.6784	0.1616	0	0	0.2812	0.2344	0.0491	0	0	0	0	0	0	0	0	0	0	0	0	0	0	0	0	0	0	0	0	0	0	0	0	0	0	0	0	0	0	0	0
mmu-mir-696_4_25_+	4	25	....TGTCGCGGTGCCTGAAGCTGT...............................................................	21	TGTCGCGGTGCCTGAAGCTGT	66	5.4122	0.0552265	1.4557	0.3458	0.4934	0.5925	0	0.0612	0	0.2344	0.1963	0	0	0	0	0	0	0	0	0	0	0	0	0	0	0.7304	0	0	0	0	0.3615	0	0	0	0.3182	0	0	0	0	0	0	0	0
mmu-mir-696_4_34_+	4	34	....TGTCGCGGTGCCTGAAGCTGTCCCCGAGCC......................................................	30	TGTCGCGGTGCCTGAAGCTGTCCCCGAGCC	64	3.7434	0.038198	1.4557	0.741	0.7401	0.1077	0	0.2447	0	0.1875	0.0982	0	0	0	0	0	0	0	0	0	0	0	0	0	0	0	0	0	0	0	0	0	0	0	0	0	0	0	0	0	0	0	0
mmu-mir-696_3_22_+	3	22	...CTGTCGCGGTGCCTGAAGC..................................................................	19	CTGTCGCGGTGCCTGAAGC	54	3.3	0.0336735	0.1213	0.494	0.4934	0.0539	0	0.2447	0.5623	0.3751	0.2945	0	0	0	0	0	0	0	0	0	0	0	0	0	0	0	0	0	0	0	0.3615	0	0	0	0	0	0	0	0	0	0	0	0
mmu-mir-696_4_30_+	4	30	....TGTCGCGGTGCCTGAAGCTGTCCCCG..........................................................	26	TGTCGCGGTGCCTGAAGCTGTCCCCG	53	3.0278	0.0308959	0.5459	0.988	0.37	0.1077	0	0.3058	0.5623	0	0	0	0	0	0	0	0	0	0	0	0	0	0	0	0	0	0	0	0	0	0	0	0	0	0	0	0	0	0	0	0	0	0
mmu-mir-696_4_22_+	4	22	....TGTCGCGGTGCCTGAAGC..................................................................	18	TGTCGCGGTGCCTGAAGC	51	3.1634	0.0322796	0.3639	0.494	0.8634	0.4309	0	0.1835	0	0.1875	0.0982	0	0	0	0	0	0	0	0	0	0	0	0	0	0	0	0	0	0	0	0	0	0	0	0	0	0	0	0	0	0	0	0
mmu-mir-696_4_24_+	4	24	....TGTCGCGGTGCCTGAAGCTG................................................................	20	TGTCGCGGTGCCTGAAGCTG	51	2.828	0.0288571	0.5459	0.6916	0.4317	0.4848	0.1876	0	0	0.1406	0.1472	0	0	0	0	0	0	0	0	0	0	0	0	0	0	0	0	0	0	0	0	0	0	0	0	0	0	0	0	0	0	0	0
mmu-mir-696_66_86_+	66	86	..................................................................GTGTGCTTGCTGTGGGCAGC..	20	GTGTGCTTGCTGTGGGCAGC	48	2.6246	0.0267816	0.7885	1.235	0.4934	0.1077	0	0	0	0	0	0	0	0	0	0	0	0	0	0	0	0	0	0	0	0	0	0	0	0	0	0	0	0	0	0	0	0	0	0	0	0	0
mmu-mir-696_3_27_+	3	27	...CTGTCGCGGTGCCTGAAGCTGTCC.............................................................	24	CTGTCGCGGTGCCTGAAGCTGTCC	47	2.5835	0.0263622	0.3033	0.8892	0.6784	0	0.0469	0	0.2249	0.3282	0	0	0	0	0	0	0	0	0	0	0	0	0	0	0	0	0	0	0	0	0	0	0	0	0	0	0	0	0	0	0	0	0
mmu-mir-696_59_83_+	59	83	...........................................................TGCTTGCGTGTGCTTGCTGTGGGC.....	24	TGCTTGCGTGTGCTTGCTGTGGGC	47	3.4639	0.0353459	0.4852	0.3458	1.1718	0	0	0.2447	0.3936	0	0	0	0	0	0	0	0	0	0	0	0	0	0	0	0	0.7304	0	0	0	0	0	0	0	0	0	0	0	0	0	0	0	0	0
mmu-mir-696_1_19_+	1	19	.GTCTGTCGCGGTGCCTGA.....................................................................	18	GTCTGTCGCGGTGCCTGA	44	2.4043	0.0245337	0.4246	0.5928	0.1233	0.2155	0.1407	0.1835	0.6748	0	0.0491	0	0	0	0	0	0	0	0	0	0	0	0	0	0	0	0	0	0	0	0	0	0	0	0	0	0	0	0	0	0	0	0
mmu-mir-696_4_26_+	4	26	....TGTCGCGGTGCCTGAAGCTGTC..............................................................	22	TGTCGCGGTGCCTGAAGCTGTC	44	2.2717	0.0231806	0.3033	0.5928	0.0617	0.2155	0	0.1835	0	0.3751	0.5398	0	0	0	0	0	0	0	0	0	0	0	0	0	0	0	0	0	0	0	0	0	0	0	0	0	0	0	0	0	0	0	0
mmu-mir-696_4_32_+	4	32	....TGTCGCGGTGCCTGAAGCTGTCCCCGAG........................................................	28	TGTCGCGGTGCCTGAAGCTGTCCCCGAG	44	2.5241	0.0257561	1.2737	0.494	0.3084	0.0539	0	0.1223	0.2249	0.0469	0	0	0	0	0	0	0	0	0	0	0	0	0	0	0	0	0	0	0	0	0	0	0	0	0	0	0	0	0	0	0	0	0
mmu-mir-696_4_31_+	4	31	....TGTCGCGGTGCCTGAAGCTGTCCCCGA.........................................................	27	TGTCGCGGTGCCTGAAGCTGTCCCCGA	43	2.441	0.0249082	0.9098	0.1482	0.4317	0.1077	0	0	0.5623	0.2813	0	0	0	0	0	0	0	0	0	0	0	0	0	0	0	0	0	0	0	0	0	0	0	0	0	0	0	0	0	0	0	0	0
mmu-mir-696_63_87_+	63	87	...............................................................TGCGTGTGCTTGCTGTGGGCAGCT.	24	TGCGTGTGCTTGCTGTGGGCAGCT	39	5.7199	0.0583663	0	0.1976	0	0	0	0	0	0	0	0	0	0	0	0	0	0	0	0	0	0	0	0	0	0	0	0	0	0	0.3615	0	0	0	0	0	0	0	0	0	0	0	0
mmu-mir-696_16_39_+	16	39	................TGAAGCTGTCCCCGAGCCACGCT.................................................	23	TGAAGCTGTCCCCGAGCCACGCT	38	4.0524	0.041351	0	0	0	0	0	0	0	0	0	0	0	0	0	0	0	0	0	0	0	0	0	0	0	0	0	0	0	0	0	0	0	0	0	0	0	0	0	0	0	0	0
mmu-mir-696_3_33_+	3	33	...CTGTCGCGGTGCCTGAAGCTGTCCCCGAGC.......................................................	30	CTGTCGCGGTGCCTGAAGCTGTCCCCGAGC	37	2.3095	0.0235663	0.5459	0.0988	0.7401	0.1616	0	0	0	0.1406	0.2454	0	0	0	0	0	0	0	0	0	0	0	0	0	0	0	0	0	0	0	0	0	0	0	0	0	0	0	0	0	0	0	0
mmu-mir-696_3_31_+	3	31	...CTGTCGCGGTGCCTGAAGCTGTCCCCGA.........................................................	28	CTGTCGCGGTGCCTGAAGCTGTCCCCGA	36	2.0506	0.0209245	0.7885	0.3952	0.5551	0.1077	0	0.0612	0	0.0938	0.0491	0	0	0	0	0	0	0	0	0	0	0	0	0	0	0	0	0	0	0	0	0	0	0	0	0	0	0	0	0	0	0	0
mmu-mir-696_43_63_+	43	63	...........................................GCTTTCCCGGGCTTGCTGCT.........................	20	GCTTTCCCGGGCTTGCTGCT	34	4.8145	0.0491276	0.3639	0.4446	0.185	0	0	0	0	0.1406	0.0491	0	0	0	0	0	0	0	0	0	0	0	0	0	0	0	0	0	0	0	3.2536	0	0	0	0	0	0	0	0	0	0	0	0
mmu-mir-696_3_32_+	3	32	...CTGTCGCGGTGCCTGAAGCTGTCCCCGAG........................................................	29	CTGTCGCGGTGCCTGAAGCTGTCCCCGAG	33	1.8563	0.0189418	0.3639	0.247	0.4317	0	0	0.2447	0.2812	0.1406	0.1472	0	0	0	0	0	0	0	0	0	0	0	0	0	0	0	0	0	0	0	0	0	0	0	0	0	0	0	0	0	0	0	0
mmu-mir-696_8_33_+	8	33	........GCGGTGCCTGAAGCTGTCCCCGAGC.......................................................	25	GCGGTGCCTGAAGCTGTCCCCGAGC	33	1.8443	0.0188194	0.4852	0.5434	0.6167	0.0539	0	0	0	0.0469	0.0982	0	0	0	0	0	0	0	0	0	0	0	0	0	0	0	0	0	0	0	0	0	0	0	0	0	0	0	0	0	0	0	0
mmu-mir-696_2_31_+	2	31	..TCTGTCGCGGTGCCTGAAGCTGTCCCCGA.........................................................	29	TCTGTCGCGGTGCCTGAAGCTGTCCCCGA	32	1.6989	0.0173357	0	0.5434	0.2467	0.3232	0	0	0.3936	0.0938	0.0982	0	0	0	0	0	0	0	0	0	0	0	0	0	0	0	0	0	0	0	0	0	0	0	0	0	0	0	0	0	0	0	0
mmu-mir-696_3_23_+	3	23	...CTGTCGCGGTGCCTGAAGCT.................................................................	20	CTGTCGCGGTGCCTGAAGCT	32	1.7575	0.0179337	0.3033	0.3952	0.3084	0.2693	0	0.2447	0	0.1875	0.0491	0	0	0	0	0	0	0	0	0	0	0	0	0	0	0	0	0	0	0	0	0	0	0	0	0	0	0	0	0	0	0	0
mmu-mir-696_4_28_+	4	28	....TGTCGCGGTGCCTGAAGCTGTCCC............................................................	24	TGTCGCGGTGCCTGAAGCTGTCCC	30	1.814	0.0185102	0.5459	0.4446	0.4934	0.1616	0	0	0	0	0	0	0	0	0	0	0	0	0	0	0	0	0	0	0	0	0	0	0	0	0	0	0	0	0	0	0	0	0	0	0	0	0
mmu-mir-696_67_86_+	67	86	...................................................................TGTGCTTGCTGTGGGCAGC..	19	TGTGCTTGCTGTGGGCAGC	30	1.7551	0.0179092	1.2737	0.2964	0.185	0	0	0	0	0	0	0	0	0	0	0	0	0	0	0	0	0	0	0	0	0	0	0	0	0	0	0	0	0	0	0	0	0	0	0	0	0	0
mmu-mir-696_7_33_+	7	33	.......CGCGGTGCCTGAAGCTGTCCCCGAGC.......................................................	26	CGCGGTGCCTGAAGCTGTCCCCGAGC	28	1.5797	0.0161194	0.182	0.1976	0.4317	0.0539	0	0.0612	0.5061	0	0.1472	0	0	0	0	0	0	0	0	0	0	0	0	0	0	0	0	0	0	0	0	0	0	0	0	0	0	0	0	0	0	0	0
mmu-mir-696_4_23_+	4	23	....TGTCGCGGTGCCTGAAGCT.................................................................	19	TGTCGCGGTGCCTGAAGCT	26	1.3972	0.0142571	0.1213	0.3952	0.37	0.1616	0.1407	0.0612	0	0	0.1472	0	0	0	0	0	0	0	0	0	0	0	0	0	0	0	0	0	0	0	0	0	0	0	0	0	0	0	0	0	0	0	0
mmu-mir-696_3_24_+	3	24	...CTGTCGCGGTGCCTGAAGCTG................................................................	21	CTGTCGCGGTGCCTGAAGCTG	25	1.5063	0.0153704	0.182	0.0988	0	0.1616	0	0.1223	0	0.2344	0.3926	0	0	0	0	0	0	0	0	0	0	0	0	0	0	0	0	0	0	0	0	0	0	0	0	0	0	0	0	0	0	0	0
mmu-mir-696_6_27_+	6	27	......TCGCGGTGCCTGAAGCTGTCC.............................................................	21	TCGCGGTGCCTGAAGCTGTCC	25	1.4398	0.0146918	0.2426	0	0.185	0	0	0	1.0122	0	0	0	0	0	0	0	0	0	0	0	0	0	0	0	0	0	0	0	0	0	0	0	0	0	0	0	0	0	0	0	0	0	0
mmu-mir-696_7_32_+	7	32	.......CGCGGTGCCTGAAGCTGTCCCCGAG........................................................	25	CGCGGTGCCTGAAGCTGTCCCCGAG	25	1.4509	0.0148051	0.1213	0.1482	0.9868	0.0539	0.1407	0	0	0	0	0	0	0	0	0	0	0	0	0	0	0	0	0	0	0	0	0	0	0	0	0	0	0	0	0	0	0	0	0	0	0	0
mmu-mir-696_2_21_+	2	21	..TCTGTCGCGGTGCCTGAAG...................................................................	19	TCTGTCGCGGTGCCTGAAG	23	1.4206	0.0144959	0.3033	0	0.8634	0.0539	0	0	0	0.0469	0.0491	0	0	0	0	0	0	0	0	0	0	0	0	0	0	0	0	0	0	0	0	0	0	0	0	0	0	0	0	0	0	0	0
mmu-mir-696_5_33_+	5	33	.....GTCGCGGTGCCTGAAGCTGTCCCCGAGC.......................................................	28	GTCGCGGTGCCTGAAGCTGTCCCCGAGC	23	1.237	0.0126224	0.1213	0.1976	0.4317	0	0	0	0	0.0938	0.3926	0	0	0	0	0	0	0	0	0	0	0	0	0	0	0	0	0	0	0	0	0	0	0	0	0	0	0	0	0	0	0	0
mmu-mir-696_37_55_+	37	55	.....................................CTTCCTGCTTTCCCGGGC.................................	18	CTTCCTGCTTTCCCGGGC	23	1.1789	0.0120296	0	0.247	0	0	0	0	0.4499	0.1875	0.2945	0	0	0	0	0	0	0	0	0	0	0	0	0	0	0	0	0	0	0	0	0	0	0	0	0	0	0	0	0	0	0	0
mmu-mir-696_2_32_+	2	32	..TCTGTCGCGGTGCCTGAAGCTGTCCCCGAG........................................................	30	TCTGTCGCGGTGCCTGAAGCTGTCCCCGAG	22	1.2581	0.0128378	0.1213	0.1482	0.37	0	0	0	0.6186	0	0	0	0	0	0	0	0	0	0	0	0	0	0	0	0	0	0	0	0	0	0	0	0	0	0	0	0	0	0	0	0	0	0
mmu-mir-696_4_29_+	4	29	....TGTCGCGGTGCCTGAAGCTGTCCCC...........................................................	25	TGTCGCGGTGCCTGAAGCTGTCCCC	20	1.5262	0.0155735	0.182	0.1482	0.6167	0.1077	0	0	0	0.0469	0	0	0	0	0	0	0	0	0	0	0	0	0	0	0	0	0	0	0	0	0	0	0	0	0	0	0	0	0	0	0	0	0
mmu-mir-696_6_35_+	6	35	......TCGCGGTGCCTGAAGCTGTCCCCGAGCCA.....................................................	29	TCGCGGTGCCTGAAGCTGTCCCCGAGCCA	20	1.1136	0.0113633	0.6065	0.2964	0	0.1616	0	0	0	0	0.0491	0	0	0	0	0	0	0	0	0	0	0	0	0	0	0	0	0	0	0	0	0	0	0	0	0	0	0	0	0	0	0	0
mmu-mir-696_62_87_+	62	87	..............................................................TTGCGTGTGCTTGCTGTGGGCAGCT.	25	TTGCGTGTGCTTGCTGTGGGCAGCT	19	0.9967	0.0101704	0	0.6916	0	0.0539	0	0	0	0	0.1472	0	0	0	0	0	0	0	0	0	0	0	0	0	0	0	0	0	0	0	0	0	0	0	0	0	0	0	0	0	0	0	0
mmu-mir-696_43_62_+	43	62	...........................................GCTTTCCCGGGCTTGCTGC..........................	19	GCTTTCCCGGGCTTGCTGC	18	2.0358	0.0207735	0	0.0494	0.1233	0	0	0	0	0.0938	0.2945	0	0	0	0	0	0	0	0	0	0	0	0	0	0	0	0	0	0	0	1.0845	0	0	0	0	0	0	0	0	0	0	0	0
mmu-mir-696_0_27_+	0	27	GGTCTGTCGCGGTGCCTGAAGCTGTCC.............................................................	27	GGTCTGTCGCGGTGCCTGAAGCTGTCC	17	0.9538	0.00973265	0.1213	0.1976	0.185	0	0	0	0.4499	0	0	0	0	0	0	0	0	0	0	0	0	0	0	0	0	0	0	0	0	0	0	0	0	0	0	0	0	0	0	0	0	0	0
mmu-mir-696_2_26_+	2	26	..TCTGTCGCGGTGCCTGAAGCTGTC..............................................................	24	TCTGTCGCGGTGCCTGAAGCTGTC	17	0.9429	0.00962143	0	0.6422	0	0.1077	0	0	0	0.0469	0	0	0	0	0	0	0	0	0	0	0	0	0	0	0	0	0	0	0	0	0	0	0	0	0	0	0	0	0	0	0	0	0
mmu-mir-696_48_75_+	48	75	................................................CCCGGGCTTGCTGCTTGCGTGTGCTTG.............	27	CCCGGGCTTGCTGCTTGCGTGTGCTTG	16	0.8763	0.00894184	0	0.4446	0.4317	0	0	0	0	0	0	0	0	0	0	0	0	0	0	0	0	0	0	0	0	0	0	0	0	0	0	0	0	0	0	0	0	0	0	0	0	0	0
mmu-mir-696_63_86_+	63	86	...............................................................TGCGTGTGCTTGCTGTGGGCAGC..	23	TGCGTGTGCTTGCTGTGGGCAGC	16	2.0691	0.0211133	0.182	0.0494	0	0	0	0	0	0	0.0982	0	0	0	0	0	0	0	0	0	0	0	0	0	0	0	0	0	0	0	0.723	0	0	0	0	0	0	0	0	0	0	0	0
mmu-mir-696_64_86_+	64	86	................................................................GCGTGTGCTTGCTGTGGGCAGC..	22	GCGTGTGCTTGCTGTGGGCAGC	16	1.3376	0.013649	0.5459	0	0	0	0	0.367	0	0	0	0	0	0	0	0	0	0	0	0	0	0	0	0	0	0	0	0	0	0	0	0	0	0	0	0	0	0	0	0	0	0	0
mmu-mir-696_46_67_+	46	67	..............................................TTCCCGGGCTTGCTGCTTGCG.....................	21	TTCCCGGGCTTGCTGCTTGCG	15	0.9185	0.00937245	0	0.1482	0.6784	0	0	0	0	0	0	0	0	0	0	0	0	0	0	0	0	0	0	0	0	0	0	0	0	0	0	0	0	0	0	0	0	0	0	0	0	0	0
mmu-mir-696_59_86_+	59	86	...........................................................TGCTTGCGTGTGCTTGCTGTGGGCAGC..	27	TGCTTGCGTGTGCTTGCTGTGGGCAGC	15	0.8656	0.00883265	0.3033	0	0	0	0	0	0.5623	0	0	0	0	0	0	0	0	0	0	0	0	0	0	0	0	0	0	0	0	0	0	0	0	0	0	0	0	0	0	0	0	0	0
mmu-mir-696_0_18_+	0	18	GGTCTGTCGCGGTGCCTG......................................................................	18	GGTCTGTCGCGGTGCCTG	14	0.8269	0.00843776	0.6065	0.1482	0	0	0	0	0	0	0	0	0	0	0	0	0	0	0	0	0	0	0	0	0	0	0	0	0	0	0	0	0	0	0	0	0	0	0	0	0	0	0
mmu-mir-696_2_20_+	2	20	..TCTGTCGCGGTGCCTGAA....................................................................	18	TCTGTCGCGGTGCCTGAA	14	0.8099	0.00826429	0.182	0.0494	0.37	0.1616	0	0	0	0.0469	0	0	0	0	0	0	0	0	0	0	0	0	0	0	0	0	0	0	0	0	0	0	0	0	0	0	0	0	0	0	0	0	0
mmu-mir-696_6_30_+	6	30	......TCGCGGTGCCTGAAGCTGTCCCCG..........................................................	24	TCGCGGTGCCTGAAGCTGTCCCCG	14	0.7394	0.0075449	0	0.3458	0	0	0	0	0.3936	0	0	0	0	0	0	0	0	0	0	0	0	0	0	0	0	0	0	0	0	0	0	0	0	0	0	0	0	0	0	0	0	0	0
mmu-mir-696_8_38_+	8	38	........GCGGTGCCTGAAGCTGTCCCCGAGCCACGC..................................................	30	GCGGTGCCTGAAGCTGTCCCCGAGCCACGC	14	0.7775	0.00793367	0	0.3458	0.4317	0	0	0	0	0	0	0	0	0	0	0	0	0	0	0	0	0	0	0	0	0	0	0	0	0	0	0	0	0	0	0	0	0	0	0	0	0	0
mmu-mir-696_38_56_+	38	56	......................................TTCCTGCTTTCCCGGGCT................................	18	TTCCTGCTTTCCCGGGCT	14	0.7591	0.00774592	0.3639	0.3952	0	0	0	0	0	0	0	0	0	0	0	0	0	0	0	0	0	0	0	0	0	0	0	0	0	0	0	0	0	0	0	0	0	0	0	0	0	0	0
mmu-mir-696_45_63_+	45	63	.............................................TTTCCCGGGCTTGCTGCT.........................	18	TTTCCCGGGCTTGCTGCT	14	0.7838	0.00799796	0.4246	0.1976	0	0.1616	0	0	0	0	0	0	0	0	0	0	0	0	0	0	0	0	0	0	0	0	0	0	0	0	0	0	0	0	0	0	0	0	0	0	0	0	0
mmu-mir-696_45_66_+	45	66	.............................................TTTCCCGGGCTTGCTGCTTGC......................	21	TTTCCCGGGCTTGCTGCTTGC	14	0.7686	0.00784286	0.3033	0.2964	0	0.1077	0	0.0612	0	0	0	0	0	0	0	0	0	0	0	0	0	0	0	0	0	0	0	0	0	0	0	0	0	0	0	0	0	0	0	0	0	0	0
mmu-mir-696_48_66_+	48	66	................................................CCCGGGCTTGCTGCTTGC......................	18	CCCGGGCTTGCTGCTTGC	14	0.8045	0.00820918	0.1213	0.1976	0.4317	0.0539	0	0	0	0	0	0	0	0	0	0	0	0	0	0	0	0	0	0	0	0	0	0	0	0	0	0	0	0	0	0	0	0	0	0	0	0	0
mmu-mir-696_62_86_+	62	86	..............................................................TTGCGTGTGCTTGCTGTGGGCAGC..	24	TTGCGTGTGCTTGCTGTGGGCAGC	14	0.7819	0.00797857	0.3639	0.3458	0	0	0	0	0	0	0	0	0	0	0	0	0	0	0	0	0	0	0	0	0	0	0	0	0	0	0	0	0	0	0	0	0	0	0	0	0	0	0
mmu-mir-696_65_86_+	65	86	.................................................................CGTGTGCTTGCTGTGGGCAGC..	21	CGTGTGCTTGCTGTGGGCAGC	14	0.8491	0.00866429	0.8491	0	0	0	0	0	0	0	0	0	0	0	0	0	0	0	0	0	0	0	0	0	0	0	0	0	0	0	0	0	0	0	0	0	0	0	0	0	0	0	0
mmu-mir-696_5_34_+	5	34	.....GTCGCGGTGCCTGAAGCTGTCCCCGAGCC......................................................	29	GTCGCGGTGCCTGAAGCTGTCCCCGAGCC	13	0.6518	0.00665102	0.1213	0.247	0	0	0	0	0	0.2344	0.0491	0	0	0	0	0	0	0	0	0	0	0	0	0	0	0	0	0	0	0	0	0	0	0	0	0	0	0	0	0	0	0	0
mmu-mir-696_5_35_+	5	35	.....GTCGCGGTGCCTGAAGCTGTCCCCGAGCCA.....................................................	30	GTCGCGGTGCCTGAAGCTGTCCCCGAGCCA	13	0.6416	0.00654694	0	0.5434	0	0	0	0	0	0	0.0982	0	0	0	0	0	0	0	0	0	0	0	0	0	0	0	0	0	0	0	0	0	0	0	0	0	0	0	0	0	0	0	0
mmu-mir-696_43_61_+	43	61	...........................................GCTTTCCCGGGCTTGCTG...........................	18	GCTTTCCCGGGCTTGCTG	13	3.9577	0.0403847	0	0	0	0	0	0	0	0	0	0	0	0	0	0	0	0	0	0	0	0	0	0	0	0	0	0	0	0	3.2536	0	0	0	0	0	0	0	0	0	0	0	0
mmu-mir-696_47_75_+	47	75	...............................................TCCCGGGCTTGCTGCTTGCGTGTGCTTG.............	28	TCCCGGGCTTGCTGCTTGCGTGTGCTTG	13	0.7496	0.00764898	0.182	0.1976	0.37	0	0	0	0	0	0	0	0	0	0	0	0	0	0	0	0	0	0	0	0	0	0	0	0	0	0	0	0	0	0	0	0	0	0	0	0	0	0
mmu-mir-696_1_25_+	1	25	.GTCTGTCGCGGTGCCTGAAGCTGT...............................................................	24	GTCTGTCGCGGTGCCTGAAGCTGT	12	0.672	0.00685714	0	0.0988	0.1233	0	0	0	0.4499	0	0	0	0	0	0	0	0	0	0	0	0	0	0	0	0	0	0	0	0	0	0	0	0	0	0	0	0	0	0	0	0	0	0
mmu-mir-696_2_23_+	2	23	..TCTGTCGCGGTGCCTGAAGCT.................................................................	21	TCTGTCGCGGTGCCTGAAGCT	12	0.6217	0.00634388	0.0607	0.1482	0	0.0539	0	0.1223	0	0.1875	0.0491	0	0	0	0	0	0	0	0	0	0	0	0	0	0	0	0	0	0	0	0	0	0	0	0	0	0	0	0	0	0	0	0
mmu-mir-696_2_27_+	2	27	..TCTGTCGCGGTGCCTGAAGCTGTCC.............................................................	25	TCTGTCGCGGTGCCTGAAGCTGTCC	12	0.6487	0.00661939	0	0.247	0.2467	0	0	0.0612	0	0.0938	0	0	0	0	0	0	0	0	0	0	0	0	0	0	0	0	0	0	0	0	0	0	0	0	0	0	0	0	0	0	0	0	0
mmu-mir-696_6_32_+	6	32	......TCGCGGTGCCTGAAGCTGTCCCCGAG........................................................	26	TCGCGGTGCCTGAAGCTGTCCCCGAG	12	0.7023	0.00716633	0.1213	0.0494	0.37	0.1616	0	0	0	0	0	0	0	0	0	0	0	0	0	0	0	0	0	0	0	0	0	0	0	0	0	0	0	0	0	0	0	0	0	0	0	0	0
mmu-mir-696_7_30_+	7	30	.......CGCGGTGCCTGAAGCTGTCCCCG..........................................................	23	CGCGGTGCCTGAAGCTGTCCCCG	12	0.6804	0.00694286	0.3033	0.1976	0.1233	0	0	0	0.0562	0	0	0	0	0	0	0	0	0	0	0	0	0	0	0	0	0	0	0	0	0	0	0	0	0	0	0	0	0	0	0	0	0	0
mmu-mir-696_9_28_+	9	28	.........CGGTGCCTGAAGCTGTCCC............................................................	19	CGGTGCCTGAAGCTGTCCC	12	0.7196	0.00734286	0.4852	0.0494	0.185	0	0	0	0	0	0	0	0	0	0	0	0	0	0	0	0	0	0	0	0	0	0	0	0	0	0	0	0	0	0	0	0	0	0	0	0	0	0
mmu-mir-696_14_32_+	14	32	..............CCTGAAGCTGTCCCCGAG........................................................	18	CCTGAAGCTGTCCCCGAG	12	0.6667	0.00680306	0.2426	0	0	0	0	0	0.2812	0.0938	0.0491	0	0	0	0	0	0	0	0	0	0	0	0	0	0	0	0	0	0	0	0	0	0	0	0	0	0	0	0	0	0	0	0
mmu-mir-696_42_63_+	42	63	..........................................TGCTTTCCCGGGCTTGCTGCT.........................	21	TGCTTTCCCGGGCTTGCTGCT	12	2.1311	0.0217459	0.3033	0	0	0	0.0469	0	0	0	0	0	0	0	0	0	0	0	0	0	0	0	0	0	0	0	0	0	0	0	1.446	0	0	0	0	0	0	0	0	0	0	0	0
mmu-mir-696_46_74_+	46	74	..............................................TTCCCGGGCTTGCTGCTTGCGTGTGCTT..............	28	TTCCCGGGCTTGCTGCTTGCGTGTGCTT	12	0.6885	0.00702551	0	0.1482	0.4934	0	0.0469	0	0	0	0	0	0	0	0	0	0	0	0	0	0	0	0	0	0	0	0	0	0	0	0	0	0	0	0	0	0	0	0	0	0	0	0
mmu-mir-696_2_25_+	2	25	..TCTGTCGCGGTGCCTGAAGCTGT...............................................................	23	TCTGTCGCGGTGCCTGAAGCTGT	11	0.6723	0.0068602	0.3639	0	0.3084	0	0	0	0	0	0	0	0	0	0	0	0	0	0	0	0	0	0	0	0	0	0	0	0	0	0	0	0	0	0	0	0	0	0	0	0	0	0
mmu-mir-696_7_26_+	7	26	.......CGCGGTGCCTGAAGCTGTC..............................................................	19	CGCGGTGCCTGAAGCTGTC	11	0.5973	0.0060949	0	0.1482	0.3084	0	0.0938	0	0	0.0469	0	0	0	0	0	0	0	0	0	0	0	0	0	0	0	0	0	0	0	0	0	0	0	0	0	0	0	0	0	0	0	0	0
mmu-mir-696_12_33_+	12	33	............TGCCTGAAGCTGTCCCCGAGC.......................................................	21	TGCCTGAAGCTGTCCCCGAGC	11	0.6202	0.00632857	0.182	0.3458	0	0	0	0	0	0	0	0	0	0	0	0	0	0	0	0	0	0	0	0	0	0	0	0	0	0	0	0	0	0	0	0	0	0	0	0	0	0	0
mmu-mir-696_15_33_+	15	33	...............CTGAAGCTGTCCCCGAGC.......................................................	18	CTGAAGCTGTCCCCGAGC	11	0.7825	0.00798469	0.182	0	0.3084	0	0	0	0	0.0938	0	0	0	0	0	0	0	0	0	0	0	0	0	0	0	0	0	0	0	0	0	0	0	0	0	0	0	0	0	0	0	0	0
mmu-mir-696_16_38_+	16	38	................TGAAGCTGTCCCCGAGCCACGC..................................................	22	TGAAGCTGTCCCCGAGCCACGC	11	0.6608	0.00674286	0.0607	0	0	0	0	0.2447	0	0.1406	0	0	0	0	0	0	0	0	0	0	0	0	0	0	0	0	0	0	0	0	0	0	0	0	0	0	0	0	0	0	0	0	0
mmu-mir-696_46_66_+	46	66	..............................................TTCCCGGGCTTGCTGCTTGC......................	20	TTCCCGGGCTTGCTGCTTGC	11	0.5676	0.00579184	0	0.3952	0.1233	0	0	0	0	0	0.0491	0	0	0	0	0	0	0	0	0	0	0	0	0	0	0	0	0	0	0	0	0	0	0	0	0	0	0	0	0	0	0	0
mmu-mir-696_65_84_+	65	84	.................................................................CGTGTGCTTGCTGTGGGCA....	19	CGTGTGCTTGCTGTGGGCA	11	0.5904	0.00602449	0.2426	0.247	0	0.0539	0	0	0	0.0469	0	0	0	0	0	0	0	0	0	0	0	0	0	0	0	0	0	0	0	0	0	0	0	0	0	0	0	0	0	0	0	0	0
mmu-mir-696_3_28_+	3	28	...CTGTCGCGGTGCCTGAAGCTGTCCC............................................................	25	CTGTCGCGGTGCCTGAAGCTGTCCC	10	0.6065	0.00618878	0.6065	0	0	0	0	0	0	0	0	0	0	0	0	0	0	0	0	0	0	0	0	0	0	0	0	0	0	0	0	0	0	0	0	0	0	0	0	0	0	0	0
mmu-mir-696_5_30_+	5	30	.....GTCGCGGTGCCTGAAGCTGTCCCCG..........................................................	25	GTCGCGGTGCCTGAAGCTGTCCCCG	10	0.5769	0.00588673	0.1213	0	0.3084	0	0	0	0	0	0.1472	0	0	0	0	0	0	0	0	0	0	0	0	0	0	0	0	0	0	0	0	0	0	0	0	0	0	0	0	0	0	0	0
mmu-mir-696_9_27_+	9	27	.........CGGTGCCTGAAGCTGTCC.............................................................	18	CGGTGCCTGAAGCTGTCC	10	0.5234	0.00534082	0.182	0	0	0	0	0	0	0.0469	0.2945	0	0	0	0	0	0	0	0	0	0	0	0	0	0	0	0	0	0	0	0	0	0	0	0	0	0	0	0	0	0	0	0
mmu-mir-696_45_68_+	45	68	.............................................TTTCCCGGGCTTGCTGCTTGCGT....................	23	TTTCCCGGGCTTGCTGCTTGCGT	10	0.6152	0.00627755	0	0	0.4317	0	0	0.1835	0	0	0	0	0	0	0	0	0	0	0	0	0	0	0	0	0	0	0	0	0	0	0	0	0	0	0	0	0	0	0	0	0	0	0
mmu-mir-696_5_32_+	5	32	.....GTCGCGGTGCCTGAAGCTGTCCCCGAG........................................................	27	GTCGCGGTGCCTGAAGCTGTCCCCGAG	9	0.5068	0.00517143	0	0.0494	0.2467	0.1616	0	0	0	0	0.0491	0	0	0	0	0	0	0	0	0	0	0	0	0	0	0	0	0	0	0	0	0	0	0	0	0	0	0	0	0	0	0	0
mmu-mir-696_9_37_+	9	37	.........CGGTGCCTGAAGCTGTCCCCGAGCCACG...................................................	28	CGGTGCCTGAAGCTGTCCCCGAGCCACG	9	0.5285	0.00539286	0.1213	0.0988	0.3084	0	0	0	0	0	0	0	0	0	0	0	0	0	0	0	0	0	0	0	0	0	0	0	0	0	0	0	0	0	0	0	0	0	0	0	0	0	0
mmu-mir-696_41_66_+	41	66	.........................................CTGCTTTCCCGGGCTTGCTGCTTGC......................	25	CTGCTTTCCCGGGCTTGCTGCTTGC	9	0.5149	0.00525408	0.1213	0	0	0	0	0	0.3936	0	0	0	0	0	0	0	0	0	0	0	0	0	0	0	0	0	0	0	0	0	0	0	0	0	0	0	0	0	0	0	0	0	0
mmu-mir-696_45_64_+	45	64	.............................................TTTCCCGGGCTTGCTGCTT........................	19	TTTCCCGGGCTTGCTGCTT	9	0.4693	0.00478878	0.0607	0.247	0	0.1616	0	0	0	0	0	0	0	0	0	0	0	0	0	0	0	0	0	0	0	0	0	0	0	0	0	0	0	0	0	0	0	0	0	0	0	0	0
mmu-mir-696_48_78_+	48	78	................................................CCCGGGCTTGCTGCTTGCGTGTGCTTGCTG..........	30	CCCGGGCTTGCTGCTTGCGTGTGCTTGCTG	9	0.4691	0.00478673	0	0.3458	0.1233	0	0	0	0	0	0	0	0	0	0	0	0	0	0	0	0	0	0	0	0	0	0	0	0	0	0	0	0	0	0	0	0	0	0	0	0	0	0
mmu-mir-696_63_88_+	63	88	...............................................................TGCGTGTGCTTGCTGTGGGCAGCTT	25	TGCGTGTGCTTGCTGTGGGCAGCTT	9	0.5828	0.00594694	0.182	0	0.3084	0	0	0	0	0	0	0	0	0	0	0	0	0	0	0	0	0	0	0	0	0	0	0	0	0	0	0	0	0	0	0	0	0	0	0	0	0	0
mmu-mir-696_3_30_+	3	30	...CTGTCGCGGTGCCTGAAGCTGTCCCCG..........................................................	27	CTGTCGCGGTGCCTGAAGCTGTCCCCG	8	0.4402	0.00449184	0.2426	0.1976	0	0	0	0	0	0	0	0	0	0	0	0	0	0	0	0	0	0	0	0	0	0	0	0	0	0	0	0	0	0	0	0	0	0	0	0	0	0	0
mmu-mir-696_5_24_+	5	24	.....GTCGCGGTGCCTGAAGCTG................................................................	19	GTCGCGGTGCCTGAAGCTG	8	0.4788	0.00488571	0	0	0	0.0539	0	0	0.2249	0.0469	0.0491	0	0	0	0	0	0	0	0	0	0	0	0	0	0	0	0	0	0	0	0	0	0	0	0	0	0	0	0	0	0	0	0
mmu-mir-696_7_35_+	7	35	.......CGCGGTGCCTGAAGCTGTCCCCGAGCCA.....................................................	28	CGCGGTGCCTGAAGCTGTCCCCGAGCCA	8	0.4432	0.00452245	0	0.1976	0.1233	0	0	0.1223	0	0	0	0	0	0	0	0	0	0	0	0	0	0	0	0	0	0	0	0	0	0	0	0	0	0	0	0	0	0	0	0	0	0	0
mmu-mir-696_9_29_+	9	29	.........CGGTGCCTGAAGCTGTCCCC...........................................................	20	CGGTGCCTGAAGCTGTCCCC	8	0.3921	0.00400102	0	0.247	0	0	0	0	0	0.0469	0.0982	0	0	0	0	0	0	0	0	0	0	0	0	0	0	0	0	0	0	0	0	0	0	0	0	0	0	0	0	0	0	0	0
mmu-mir-696_15_39_+	15	39	...............CTGAAGCTGTCCCCGAGCCACGCT.................................................	24	CTGAAGCTGTCCCCGAGCCACGCT	8	1.0065	0.0102704	0	0	0	0	0	0	0	0.2344	0.0491	0	0	0	0	0	0	0	0	0	0	0	0	0	0	0	0	0	0	0	0.723	0	0	0	0	0	0	0	0	0	0	0	0
mmu-mir-696_17_37_+	17	37	.................GAAGCTGTCCCCGAGCCACG...................................................	20	GAAGCTGTCCCCGAGCCACG	8	1.986	0.0202653	0	0	0	0	0	0.367	0	0	0	0	0	0	0	0	0	0	0	0	0	0	0	0	0	0	0	0	0	0	0	0	0	0	0	0	0	0	0	0	0	0	0
mmu-mir-696_35_59_+	35	59	...................................CGCTTCCTGCTTTCCCGGGCTTGC.............................	24	CGCTTCCTGCTTTCCCGGGCTTGC	8	0.4358	0.00444694	0	0	0	0.1077	0	0	0.2812	0.0469	0	0	0	0	0	0	0	0	0	0	0	0	0	0	0	0	0	0	0	0	0	0	0	0	0	0	0	0	0	0	0	0	0
mmu-mir-696_37_56_+	37	56	.....................................CTTCCTGCTTTCCCGGGCT................................	19	CTTCCTGCTTTCCCGGGCT	8	1.2478	0.0127327	0	0.247	0.1233	0	0	0	0	0	0	0	0	0	0	0	0	0	0	0	0	0	0	0	0.8775	0	0	0	0	0	0	0	0	0	0	0	0	0	0	0	0	0	0
mmu-mir-696_44_63_+	44	63	............................................CTTTCCCGGGCTTGCTGCT.........................	19	CTTTCCCGGGCTTGCTGCT	8	0.7369	0.00751939	0	0	0.0617	0.2155	0	0	0	0	0.0982	0	0	0	0	0	0	0	0	0	0	0	0	0	0	0	0	0	0	0	0.3615	0	0	0	0	0	0	0	0	0	0	0	0
mmu-mir-696_49_75_+	49	75	.................................................CCGGGCTTGCTGCTTGCGTGTGCTTG.............	26	CCGGGCTTGCTGCTTGCGTGTGCTTG	8	0.4913	0.00501327	0.1213	0	0.37	0	0	0	0	0	0	0	0	0	0	0	0	0	0	0	0	0	0	0	0	0	0	0	0	0	0	0	0	0	0	0	0	0	0	0	0	0	0
mmu-mir-696_1_23_+	1	23	.GTCTGTCGCGGTGCCTGAAGCT.................................................................	22	GTCTGTCGCGGTGCCTGAAGCT	7	0.3801	0.00387857	0	0.1482	0.185	0	0.0469	0	0	0	0	0	0	0	0	0	0	0	0	0	0	0	0	0	0	0	0	0	0	0	0	0	0	0	0	0	0	0	0	0	0	0	0
mmu-mir-696_1_30_+	1	30	.GTCTGTCGCGGTGCCTGAAGCTGTCCCCG..........................................................	29	GTCTGTCGCGGTGCCTGAAGCTGTCCCCG	7	0.3382	0.00345102	0	0.1976	0	0	0	0	0	0.1406	0	0	0	0	0	0	0	0	0	0	0	0	0	0	0	0	0	0	0	0	0	0	0	0	0	0	0	0	0	0	0	0	0
mmu-mir-696_3_29_+	3	29	...CTGTCGCGGTGCCTGAAGCTGTCCCC...........................................................	26	CTGTCGCGGTGCCTGAAGCTGTCCCC	7	0.4246	0.00433265	0.4246	0	0	0	0	0	0	0	0	0	0	0	0	0	0	0	0	0	0	0	0	0	0	0	0	0	0	0	0	0	0	0	0	0	0	0	0	0	0	0	0
mmu-mir-696_7_31_+	7	31	.......CGCGGTGCCTGAAGCTGTCCCCGA.........................................................	24	CGCGGTGCCTGAAGCTGTCCCCGA	7	0.3458	0.00352857	0	0.3458	0	0	0	0	0	0	0	0	0	0	0	0	0	0	0	0	0	0	0	0	0	0	0	0	0	0	0	0	0	0	0	0	0	0	0	0	0	0	0
mmu-mir-696_8_32_+	8	32	........GCGGTGCCTGAAGCTGTCCCCGAG........................................................	24	GCGGTGCCTGAAGCTGTCCCCGAG	7	0.4115	0.00419898	0	0	0.3084	0	0	0	0.0562	0.0469	0	0	0	0	0	0	0	0	0	0	0	0	0	0	0	0	0	0	0	0	0	0	0	0	0	0	0	0	0	0	0	0	0
mmu-mir-696_8_34_+	8	34	........GCGGTGCCTGAAGCTGTCCCCGAGCC......................................................	26	GCGGTGCCTGAAGCTGTCCCCGAGCC	7	0.3915	0.0039949	0	0.0988	0.185	0.1077	0	0	0	0	0	0	0	0	0	0	0	0	0	0	0	0	0	0	0	0	0	0	0	0	0	0	0	0	0	0	0	0	0	0	0	0	0
mmu-mir-696_11_39_+	11	39	...........GTGCCTGAAGCTGTCCCCGAGCCACGCT.................................................	28	GTGCCTGAAGCTGTCCCCGAGCCACGCT	7	4.8529	0.0495194	0	0	0	0	0	0	0.3374	0	0	0	0	0	0	0	0	0	0	0	0	0	0	0	0	0	0	0	0	0	0	0	0	0	0	0	0	0	0	0	0	0	0
mmu-mir-696_14_38_+	14	38	..............CCTGAAGCTGTCCCCGAGCCACGC..................................................	24	CCTGAAGCTGTCCCCGAGCCACGC	7	0.3282	0.00334898	0	0	0	0	0	0	0	0.3282	0	0	0	0	0	0	0	0	0	0	0	0	0	0	0	0	0	0	0	0	0	0	0	0	0	0	0	0	0	0	0	0	0
mmu-mir-696_38_63_+	38	63	......................................TTCCTGCTTTCCCGGGCTTGCTGCT.........................	25	TTCCTGCTTTCCCGGGCTTGCTGCT	7	0.4307	0.0043949	0.0607	0	0.37	0	0	0	0	0	0	0	0	0	0	0	0	0	0	0	0	0	0	0	0	0	0	0	0	0	0	0	0	0	0	0	0	0	0	0	0	0	0
mmu-mir-696_43_64_+	43	64	...........................................GCTTTCCCGGGCTTGCTGCTT........................	21	GCTTTCCCGGGCTTGCTGCTT	7	0.5676	0.00579184	0	0	0	0.1077	0	0	0	0.0938	0	0	0	0	0	0	0	0	0	0	0	0	0	0	0	0	0	0	0	0	0	0	0	0	0	0	0	0	0	0	0	0	0
mmu-mir-696_45_65_+	45	65	.............................................TTTCCCGGGCTTGCTGCTTG.......................	20	TTTCCCGGGCTTGCTGCTTG	7	0.3458	0.00352857	0	0.3458	0	0	0	0	0	0	0	0	0	0	0	0	0	0	0	0	0	0	0	0	0	0	0	0	0	0	0	0	0	0	0	0	0	0	0	0	0	0	0
mmu-mir-696_48_73_+	48	73	................................................CCCGGGCTTGCTGCTTGCGTGTGCT...............	25	CCCGGGCTTGCTGCTTGCGTGTGCT	7	0.3458	0.00352857	0	0.3458	0	0	0	0	0	0	0	0	0	0	0	0	0	0	0	0	0	0	0	0	0	0	0	0	0	0	0	0	0	0	0	0	0	0	0	0	0	0	0
mmu-mir-696_49_78_+	49	78	.................................................CCGGGCTTGCTGCTTGCGTGTGCTTGCTG..........	29	CCGGGCTTGCTGCTTGCGTGTGCTTGCTG	7	0.388	0.00395918	0.2426	0.0494	0	0	0	0	0	0.0469	0.0491	0	0	0	0	0	0	0	0	0	0	0	0	0	0	0	0	0	0	0	0	0	0	0	0	0	0	0	0	0	0	0	0
mmu-mir-696_0_26_+	0	26	GGTCTGTCGCGGTGCCTGAAGCTGTC..............................................................	26	GGTCTGTCGCGGTGCCTGAAGCTGTC	6	0.3053	0.00311531	0	0.1976	0	0.1077	0	0	0	0	0	0	0	0	0	0	0	0	0	0	0	0	0	0	0	0	0	0	0	0	0	0	0	0	0	0	0	0	0	0	0	0	0
mmu-mir-696_2_22_+	2	22	..TCTGTCGCGGTGCCTGAAGC..................................................................	20	TCTGTCGCGGTGCCTGAAGC	6	0.5409	0.00551939	0	0	0.2467	0	0	0	0	0	0	0	0	0	0	0	0	0	0	0	0	0	0	0	0	0	0	0	0	0	0	0	0	0	0	0	0	0	0	0	0	0	0
mmu-mir-696_6_34_+	6	34	......TCGCGGTGCCTGAAGCTGTCCCCGAGCC......................................................	28	TCGCGGTGCCTGAAGCTGTCCCCGAGCC	6	0.3445	0.00351531	0.0607	0.0988	0.185	0	0	0	0	0	0	0	0	0	0	0	0	0	0	0	0	0	0	0	0	0	0	0	0	0	0	0	0	0	0	0	0	0	0	0	0	0	0
mmu-mir-696_9_32_+	9	32	.........CGGTGCCTGAAGCTGTCCCCGAG........................................................	23	CGGTGCCTGAAGCTGTCCCCGAG	6	0.3034	0.00309592	0	0.0988	0.0617	0	0	0	0	0.0938	0.0491	0	0	0	0	0	0	0	0	0	0	0	0	0	0	0	0	0	0	0	0	0	0	0	0	0	0	0	0	0	0	0	0
mmu-mir-696_10_39_+	10	39	..........GGTGCCTGAAGCTGTCCCCGAGCCACGCT.................................................	29	GGTGCCTGAAGCTGTCCCCGAGCCACGCT	6	0.3374	0.00344286	0	0	0	0	0	0	0.3374	0	0	0	0	0	0	0	0	0	0	0	0	0	0	0	0	0	0	0	0	0	0	0	0	0	0	0	0	0	0	0	0	0	0
mmu-mir-696_14_33_+	14	33	..............CCTGAAGCTGTCCCCGAGC.......................................................	19	CCTGAAGCTGTCCCCGAGC	6	0.3448	0.00351837	0	0	0	0.1616	0	0	0	0.0938	0	0	0	0	0	0	0	0	0	0	0	0	0	0	0	0	0	0	0	0	0	0	0	0	0	0	0	0	0	0	0	0	0
mmu-mir-696_24_47_+	24	47	........................TCCCCGAGCCACGCTTCCTGCTT.........................................	23	TCCCCGAGCCACGCTTCCTGCTT	6	0.3639	0.00371327	0.3639	0	0	0	0	0	0	0	0	0	0	0	0	0	0	0	0	0	0	0	0	0	0	0	0	0	0	0	0	0	0	0	0	0	0	0	0	0	0	0	0
mmu-mir-696_27_55_+	27	55	...........................CCGAGCCACGCTTCCTGCTTTCCCGGGC.................................	28	CCGAGCCACGCTTCCTGCTTTCCCGGGC	6	0.37	0.00377551	0	0	0.37	0	0	0	0	0	0	0	0	0	0	0	0	0	0	0	0	0	0	0	0	0	0	0	0	0	0	0	0	0	0	0	0	0	0	0	0	0	0
mmu-mir-696_27_56_+	27	56	...........................CCGAGCCACGCTTCCTGCTTTCCCGGGCT................................	29	CCGAGCCACGCTTCCTGCTTTCCCGGGCT	6	0.2964	0.00302449	0	0.2964	0	0	0	0	0	0	0	0	0	0	0	0	0	0	0	0	0	0	0	0	0	0	0	0	0	0	0	0	0	0	0	0	0	0	0	0	0	0	0
mmu-mir-696_34_55_+	34	55	..................................ACGCTTCCTGCTTTCCCGGGC.................................	21	ACGCTTCCTGCTTTCCCGGGC	6	0.37	0.00377551	0	0	0.37	0	0	0	0	0	0	0	0	0	0	0	0	0	0	0	0	0	0	0	0	0	0	0	0	0	0	0	0	0	0	0	0	0	0	0	0	0	0
mmu-mir-696_46_64_+	46	64	..............................................TTCCCGGGCTTGCTGCTT........................	18	TTCCCGGGCTTGCTGCTT	6	0.3189	0.00325408	0.1213	0.1976	0	0	0	0	0	0	0	0	0	0	0	0	0	0	0	0	0	0	0	0	0	0	0	0	0	0	0	0	0	0	0	0	0	0	0	0	0	0	0
mmu-mir-696_48_67_+	48	67	................................................CCCGGGCTTGCTGCTTGCG.....................	19	CCCGGGCTTGCTGCTTGCG	6	0.37	0.00377551	0	0	0.37	0	0	0	0	0	0	0	0	0	0	0	0	0	0	0	0	0	0	0	0	0	0	0	0	0	0	0	0	0	0	0	0	0	0	0	0	0	0
mmu-mir-696_63_84_+	63	84	...............................................................TGCGTGTGCTTGCTGTGGGCA....	21	TGCGTGTGCTTGCTGTGGGCA	6	0.3332	0.0034	0	0.1482	0.185	0	0	0	0	0	0	0	0	0	0	0	0	0	0	0	0	0	0	0	0	0	0	0	0	0	0	0	0	0	0	0	0	0	0	0	0	0	0
mmu-mir-696_66_84_+	66	84	..................................................................GTGTGCTTGCTGTGGGCA....	18	GTGTGCTTGCTGTGGGCA	6	0.2964	0.00302449	0	0.2964	0	0	0	0	0	0	0	0	0	0	0	0	0	0	0	0	0	0	0	0	0	0	0	0	0	0	0	0	0	0	0	0	0	0	0	0	0	0	0
mmu-mir-696_1_20_+	1	20	.GTCTGTCGCGGTGCCTGAA....................................................................	19	GTCTGTCGCGGTGCCTGAA	5	0.2812	0.00286939	0	0	0	0	0	0	0.2812	0	0	0	0	0	0	0	0	0	0	0	0	0	0	0	0	0	0	0	0	0	0	0	0	0	0	0	0	0	0	0	0	0	0
mmu-mir-696_1_21_+	1	21	.GTCTGTCGCGGTGCCTGAAG...................................................................	20	GTCTGTCGCGGTGCCTGAAG	5	0.4346	0.00443469	0.1213	0	0	0	0	0.0612	0	0	0	0	0	0	0	0	0	0	0	0	0	0	0	0	0	0	0	0	0	0	0	0	0	0	0	0	0	0	0	0	0	0	0
mmu-mir-696_1_24_+	1	24	.GTCTGTCGCGGTGCCTGAAGCTG................................................................	23	GTCTGTCGCGGTGCCTGAAGCTG	5	0.287	0.00292857	0	0.1482	0	0	0	0	0	0.0469	0	0	0	0	0	0	0	0	0	0	0	0	0	0	0	0	0	0	0	0	0	0	0	0	0	0	0	0	0	0	0	0	0
mmu-mir-696_1_27_+	1	27	.GTCTGTCGCGGTGCCTGAAGCTGTCC.............................................................	26	GTCTGTCGCGGTGCCTGAAGCTGTCC	5	0.2445	0.0024949	0	0.1976	0	0	0	0	0	0.0469	0	0	0	0	0	0	0	0	0	0	0	0	0	0	0	0	0	0	0	0	0	0	0	0	0	0	0	0	0	0	0	0	0
mmu-mir-696_2_28_+	2	28	..TCTGTCGCGGTGCCTGAAGCTGTCCC............................................................	26	TCTGTCGCGGTGCCTGAAGCTGTCCC	5	0.2534	0.00258571	0	0.0988	0	0.1077	0	0	0	0.0469	0	0	0	0	0	0	0	0	0	0	0	0	0	0	0	0	0	0	0	0	0	0	0	0	0	0	0	0	0	0	0	0	0
mmu-mir-696_5_27_+	5	27	.....GTCGCGGTGCCTGAAGCTGTCC.............................................................	22	GTCGCGGTGCCTGAAGCTGTCC	5	0.2345	0.00239286	0	0	0	0	0.1876	0	0	0.0469	0	0	0	0	0	0	0	0	0	0	0	0	0	0	0	0	0	0	0	0	0	0	0	0	0	0	0	0	0	0	0	0	0
mmu-mir-696_7_25_+	7	25	.......CGCGGTGCCTGAAGCTGT...............................................................	18	CGCGGTGCCTGAAGCTGT	5	0.2745	0.00280102	0	0	0	0.2155	0	0	0	0	0	0	0	0	0	0	0	0	0	0	0	0	0	0	0	0	0	0	0	0	0	0	0	0	0	0	0	0	0	0	0	0	0
mmu-mir-696_8_31_+	8	31	........GCGGTGCCTGAAGCTGTCCCCGA.........................................................	23	GCGGTGCCTGAAGCTGTCCCCGA	5	0.2695	0.00275	0.1213	0.1482	0	0	0	0	0	0	0	0	0	0	0	0	0	0	0	0	0	0	0	0	0	0	0	0	0	0	0	0	0	0	0	0	0	0	0	0	0	0	0
mmu-mir-696_9_31_+	9	31	.........CGGTGCCTGAAGCTGTCCCCGA.........................................................	22	CGGTGCCTGAAGCTGTCCCCGA	5	0.2442	0.00249184	0	0.1482	0	0	0	0	0	0.0469	0.0491	0	0	0	0	0	0	0	0	0	0	0	0	0	0	0	0	0	0	0	0	0	0	0	0	0	0	0	0	0	0	0	0
mmu-mir-696_11_33_+	11	33	...........GTGCCTGAAGCTGTCCCCGAGC.......................................................	22	GTGCCTGAAGCTGTCCCCGAGC	5	0.2961	0.00302143	0	0.0494	0.2467	0	0	0	0	0	0	0	0	0	0	0	0	0	0	0	0	0	0	0	0	0	0	0	0	0	0	0	0	0	0	0	0	0	0	0	0	0	0
mmu-mir-696_11_40_+	11	40	...........GTGCCTGAAGCTGTCCCCGAGCCACGCTT................................................	29	GTGCCTGAAGCTGTCCCCGAGCCACGCTT	5	24.8422	0.253492	0	0	0	0	0	0	0	0	0	0	0	0	0	0	0	0	0	0	0	0	0	0	0	0	0	0	0	0	0	0	0	0	0	0	0	0	0	0	0	0	0
mmu-mir-696_16_37_+	16	37	................TGAAGCTGTCCCCGAGCCACG...................................................	21	TGAAGCTGTCCCCGAGCCACG	5	0.7072	0.00721633	0	0	0	0	0	0	0	0	0.0982	0	0	0	0	0	0	0	0	0	0	0	0	0	0	0	0	0	0	0	0	0	0	0	0	0	0	0	0	0	0	0	0
mmu-mir-696_42_60_+	42	60	..........................................TGCTTTCCCGGGCTTGCT............................	18	TGCTTTCCCGGGCTTGCT	5	0.8681	0.00885816	0	0	0	0	0	0	0	0.0469	0.0982	0	0	0	0	0	0	0	0	0	0	0	0	0	0	0	0	0	0	0	0.723	0	0	0	0	0	0	0	0	0	0	0	0
mmu-mir-696_44_65_+	44	65	............................................CTTTCCCGGGCTTGCTGCTTG.......................	21	CTTTCCCGGGCTTGCTGCTTG	5	0.2812	0.00286939	0	0	0	0	0	0	0.2812	0	0	0	0	0	0	0	0	0	0	0	0	0	0	0	0	0	0	0	0	0	0	0	0	0	0	0	0	0	0	0	0	0	0
mmu-mir-696_47_66_+	47	66	...............................................TCCCGGGCTTGCTGCTTGC......................	19	TCCCGGGCTTGCTGCTTGC	5	0.3595	0.00366837	0	0	0	0	0.0938	0	0	0	0.0982	0	0	0	0	0	0	0	0	0	0	0	0	0	0	0	0	0	0	0	0	0	0	0	0	0	0	0	0	0	0	0	0
mmu-mir-696_47_77_+	47	77	...............................................TCCCGGGCTTGCTGCTTGCGTGTGCTTGCT...........	30	TCCCGGGCTTGCTGCTTGCGTGTGCTTGCT	5	0.247	0.00252041	0	0.247	0	0	0	0	0	0	0	0	0	0	0	0	0	0	0	0	0	0	0	0	0	0	0	0	0	0	0	0	0	0	0	0	0	0	0	0	0	0	0
mmu-mir-696_49_76_+	49	76	.................................................CCGGGCTTGCTGCTTGCGTGTGCTTGC............	27	CCGGGCTTGCTGCTTGCGTGTGCTTGC	5	0.2812	0.00286939	0	0	0	0	0	0	0.2812	0	0	0	0	0	0	0	0	0	0	0	0	0	0	0	0	0	0	0	0	0	0	0	0	0	0	0	0	0	0	0	0	0	0
mmu-mir-696_54_74_+	54	74	......................................................CTTGCTGCTTGCGTGTGCTT..............	20	CTTGCTGCTTGCGTGTGCTT	5	0.3084	0.00314694	0	0	0.3084	0	0	0	0	0	0	0	0	0	0	0	0	0	0	0	0	0	0	0	0	0	0	0	0	0	0	0	0	0	0	0	0	0	0	0	0	0	0
mmu-mir-696_55_75_+	55	75	.......................................................TTGCTGCTTGCGTGTGCTTG.............	20	TTGCTGCTTGCGTGTGCTTG	5	0.3033	0.0030949	0.3033	0	0	0	0	0	0	0	0	0	0	0	0	0	0	0	0	0	0	0	0	0	0	0	0	0	0	0	0	0	0	0	0	0	0	0	0	0	0	0	0
mmu-mir-696_56_85_+	56	85	........................................................TGCTGCTTGCGTGTGCTTGCTGTGGGCAG...	29	TGCTGCTTGCGTGTGCTTGCTGTGGGCAG	5	0.3033	0.0030949	0.3033	0	0	0	0	0	0	0	0	0	0	0	0	0	0	0	0	0	0	0	0	0	0	0	0	0	0	0	0	0	0	0	0	0	0	0	0	0	0	0	0
mmu-mir-696_65_87_+	65	87	.................................................................CGTGTGCTTGCTGTGGGCAGCT.	22	CGTGTGCTTGCTGTGGGCAGCT	5	0.2936	0.00299592	0	0	0.2467	0	0	0	0	0.0469	0	0	0	0	0	0	0	0	0	0	0	0	0	0	0	0	0	0	0	0	0	0	0	0	0	0	0	0	0	0	0	0	0
mmu-mir-696_0_19_+	0	19	GGTCTGTCGCGGTGCCTGA.....................................................................	19	GGTCTGTCGCGGTGCCTGA	4	0.2084	0.00212653	0	0	0	0	0	0.0612	0	0	0.1472	0	0	0	0	0	0	0	0	0	0	0	0	0	0	0	0	0	0	0	0	0	0	0	0	0	0	0	0	0	0	0	0
mmu-mir-696_1_22_+	1	22	.GTCTGTCGCGGTGCCTGAAGC..................................................................	21	GTCTGTCGCGGTGCCTGAAGC	4	0.2249	0.0022949	0	0	0	0	0	0	0.2249	0	0	0	0	0	0	0	0	0	0	0	0	0	0	0	0	0	0	0	0	0	0	0	0	0	0	0	0	0	0	0	0	0	0
mmu-mir-696_2_30_+	2	30	..TCTGTCGCGGTGCCTGAAGCTGTCCCCG..........................................................	28	TCTGTCGCGGTGCCTGAAGCTGTCCCCG	4	0.1875	0.00191327	0	0	0	0	0	0	0	0.1875	0	0	0	0	0	0	0	0	0	0	0	0	0	0	0	0	0	0	0	0	0	0	0	0	0	0	0	0	0	0	0	0	0
mmu-mir-696_5_31_+	5	31	.....GTCGCGGTGCCTGAAGCTGTCCCCGA.........................................................	26	GTCGCGGTGCCTGAAGCTGTCCCCGA	4	0.1897	0.00193571	0	0	0	0	0	0	0	0.1406	0.0491	0	0	0	0	0	0	0	0	0	0	0	0	0	0	0	0	0	0	0	0	0	0	0	0	0	0	0	0	0	0	0	0
mmu-mir-696_6_24_+	6	24	......TCGCGGTGCCTGAAGCTG................................................................	18	TCGCGGTGCCTGAAGCTG	4	0.2096	0.00213878	0	0.0988	0.0617	0	0	0	0	0	0.0491	0	0	0	0	0	0	0	0	0	0	0	0	0	0	0	0	0	0	0	0	0	0	0	0	0	0	0	0	0	0	0	0
mmu-mir-696_6_33_+	6	33	......TCGCGGTGCCTGAAGCTGTCCCCGAGC.......................................................	27	TCGCGGTGCCTGAAGCTGTCCCCGAGC	4	0.2314	0.00236122	0.182	0.0494	0	0	0	0	0	0	0	0	0	0	0	0	0	0	0	0	0	0	0	0	0	0	0	0	0	0	0	0	0	0	0	0	0	0	0	0	0	0	0
mmu-mir-696_7_27_+	7	27	.......CGCGGTGCCTGAAGCTGTCC.............................................................	20	CGCGGTGCCTGAAGCTGTCC	4	0.2064	0.00210612	0.0607	0.0988	0	0	0	0	0	0.0469	0	0	0	0	0	0	0	0	0	0	0	0	0	0	0	0	0	0	0	0	0	0	0	0	0	0	0	0	0	0	0	0	0
mmu-mir-696_7_34_+	7	34	.......CGCGGTGCCTGAAGCTGTCCCCGAGCC......................................................	27	CGCGGTGCCTGAAGCTGTCCCCGAGCC	4	0.2764	0.00282041	0	0	0.1233	0	0.0469	0	0	0	0	0	0	0	0	0	0	0	0	0	0	0	0	0	0	0	0	0	0	0	0	0	0	0	0	0	0	0	0	0	0	0	0
mmu-mir-696_8_27_+	8	27	........GCGGTGCCTGAAGCTGTCC.............................................................	19	GCGGTGCCTGAAGCTGTCC	4	0.2467	0.00251735	0	0	0.2467	0	0	0	0	0	0	0	0	0	0	0	0	0	0	0	0	0	0	0	0	0	0	0	0	0	0	0	0	0	0	0	0	0	0	0	0	0	0
mmu-mir-696_8_35_+	8	35	........GCGGTGCCTGAAGCTGTCCCCGAGCCA.....................................................	27	GCGGTGCCTGAAGCTGTCCCCGAGCCA	4	0.1976	0.00201633	0	0.1976	0	0	0	0	0	0	0	0	0	0	0	0	0	0	0	0	0	0	0	0	0	0	0	0	0	0	0	0	0	0	0	0	0	0	0	0	0	0	0
mmu-mir-696_9_34_+	9	34	.........CGGTGCCTGAAGCTGTCCCCGAGCC......................................................	25	CGGTGCCTGAAGCTGTCCCCGAGCC	4	0.2467	0.00251735	0	0	0.2467	0	0	0	0	0	0	0	0	0	0	0	0	0	0	0	0	0	0	0	0	0	0	0	0	0	0	0	0	0	0	0	0	0	0	0	0	0	0
mmu-mir-696_9_36_+	9	36	.........CGGTGCCTGAAGCTGTCCCCGAGCCAC....................................................	27	CGGTGCCTGAAGCTGTCCCCGAGCCAC	4	0.2467	0.00251735	0	0	0.2467	0	0	0	0	0	0	0	0	0	0	0	0	0	0	0	0	0	0	0	0	0	0	0	0	0	0	0	0	0	0	0	0	0	0	0	0	0	0
mmu-mir-696_15_42_+	15	42	...............CTGAAGCTGTCCCCGAGCCACGCTTCC..............................................	27	CTGAAGCTGTCCCCGAGCCACGCTTCC	4	0.1976	0.00201633	0	0.1976	0	0	0	0	0	0	0	0	0	0	0	0	0	0	0	0	0	0	0	0	0	0	0	0	0	0	0	0	0	0	0	0	0	0	0	0	0	0	0
mmu-mir-696_16_45_+	16	45	................TGAAGCTGTCCCCGAGCCACGCTTCCTGC...........................................	29	TGAAGCTGTCCCCGAGCCACGCTTCCTGC	4	0.1963	0.00200306	0	0	0	0	0	0	0	0	0.1963	0	0	0	0	0	0	0	0	0	0	0	0	0	0	0	0	0	0	0	0	0	0	0	0	0	0	0	0	0	0	0	0
mmu-mir-696_18_39_+	18	39	..................AAGCTGTCCCCGAGCCACGCT.................................................	21	AAGCTGTCCCCGAGCCACGCT	4	1.0307	0.0105173	0	0	0	0	0	0	0	0	0	0	0	0	0	0	0	0	0	0	0	0	0	0	0	0	0	0	0	0	0	0	0	0	0	0	0	0	0	0	0	0	0
mmu-mir-696_19_38_+	19	38	...................AGCTGTCCCCGAGCCACGC..................................................	19	AGCTGTCCCCGAGCCACGC	4	0.6162	0.00628776	0	0	0	0	0	0	0	0	0	0	0	0	0	0	0	0	0	0	0	0	0	0	0	0	0	0	0	0	0	0	0	0	0	0	0	0	0	0	0	0	0
mmu-mir-696_40_60_+	40	60	........................................CCTGCTTTCCCGGGCTTGCT............................	20	CCTGCTTTCCCGGGCTTGCT	4	0.3811	0.00388878	0	0	0	0	0	0.0612	0	0	0	0	0	0	0	0	0	0	0	0	0	0	0	0	0	0	0	0	0	0	0	0	0	0	0	0	0	0	0	0	0	0	0
mmu-mir-696_41_59_+	41	59	.........................................CTGCTTTCCCGGGCTTGC.............................	18	CTGCTTTCCCGGGCTTGC	4	0.3685	0.0037602	0	0	0.1233	0	0	0	0	0.0469	0	0	0	0	0	0	0	0	0	0	0	0	0	0	0	0	0	0	0	0	0	0	0	0	0	0	0	0	0	0	0	0	0
mmu-mir-696_43_66_+	43	66	...........................................GCTTTCCCGGGCTTGCTGCTTGC......................	23	GCTTTCCCGGGCTTGCTGCTTGC	4	0.2338	0.00238571	0	0	0	0.1616	0	0	0	0	0	0	0	0	0	0	0	0	0	0	0	0	0	0	0	0	0	0	0	0	0	0	0	0	0	0	0	0	0	0	0	0	0
mmu-mir-696_44_64_+	44	64	............................................CTTTCCCGGGCTTGCTGCTT........................	20	CTTTCCCGGGCTTGCTGCTT	4	0.2467	0.00251735	0	0	0.2467	0	0	0	0	0	0	0	0	0	0	0	0	0	0	0	0	0	0	0	0	0	0	0	0	0	0	0	0	0	0	0	0	0	0	0	0	0	0
mmu-mir-696_46_65_+	46	65	..............................................TTCCCGGGCTTGCTGCTTG.......................	19	TTCCCGGGCTTGCTGCTTG	4	0.2176	0.00222041	0.1213	0.0494	0	0	0	0	0	0.0469	0	0	0	0	0	0	0	0	0	0	0	0	0	0	0	0	0	0	0	0	0	0	0	0	0	0	0	0	0	0	0	0	0
mmu-mir-696_46_75_+	46	75	..............................................TTCCCGGGCTTGCTGCTTGCGTGTGCTTG.............	29	TTCCCGGGCTTGCTGCTTGCGTGTGCTTG	4	0.2221	0.00226633	0	0.0988	0.1233	0	0	0	0	0	0	0	0	0	0	0	0	0	0	0	0	0	0	0	0	0	0	0	0	0	0	0	0	0	0	0	0	0	0	0	0	0	0
mmu-mir-696_47_69_+	47	69	...............................................TCCCGGGCTTGCTGCTTGCGTG...................	22	TCCCGGGCTTGCTGCTTGCGTG	4	0.2467	0.00251735	0	0	0.2467	0	0	0	0	0	0	0	0	0	0	0	0	0	0	0	0	0	0	0	0	0	0	0	0	0	0	0	0	0	0	0	0	0	0	0	0	0	0
mmu-mir-696_58_86_+	58	86	..........................................................CTGCTTGCGTGTGCTTGCTGTGGGCAGC..	28	CTGCTTGCGTGTGCTTGCTGTGGGCAGC	4	0.1875	0.00191327	0	0	0	0	0	0	0	0.1875	0	0	0	0	0	0	0	0	0	0	0	0	0	0	0	0	0	0	0	0	0	0	0	0	0	0	0	0	0	0	0	0	0
mmu-mir-696_60_85_+	60	85	............................................................GCTTGCGTGTGCTTGCTGTGGGCAG...	25	GCTTGCGTGTGCTTGCTGTGGGCAG	4	1.446	0.0147551	0	0	0	0	0	0	0	0	0	0	0	0	0	0	0	0	0	0	0	0	0	0	0	0	0	0	0	0	1.446	0	0	0	0	0	0	0	0	0	0	0	0
mmu-mir-696_64_84_+	64	84	................................................................GCGTGTGCTTGCTGTGGGCA....	20	GCGTGTGCTTGCTGTGGGCA	4	2.3691	0.0241745	0	0	0.1233	0	0	0	0	0	0	0	0	0	0	0	0	0	0	0	0	0	0	0	0	0	0	0	0	0	0	0	0	0	0	0	0	0	0	0	0	0	0
mmu-mir-696_66_85_+	66	85	..................................................................GTGTGCTTGCTGTGGGCAG...	19	GTGTGCTTGCTGTGGGCAG	4	0.3437	0.00350714	0.1213	0	0	0.0539	0	0	0	0	0	0	0	0	0	0	0	0	0	0	0	0	0	0	0	0	0	0	0	0	0	0	0	0	0	0	0	0	0	0	0	0	0
mmu-mir-696_1_26_+	1	26	.GTCTGTCGCGGTGCCTGAAGCTGTC..............................................................	25	GTCTGTCGCGGTGCCTGAAGCTGTC	3	0.1482	0.00151224	0	0.1482	0	0	0	0	0	0	0	0	0	0	0	0	0	0	0	0	0	0	0	0	0	0	0	0	0	0	0	0	0	0	0	0	0	0	0	0	0	0	0
mmu-mir-696_1_28_+	1	28	.GTCTGTCGCGGTGCCTGAAGCTGTCCC............................................................	27	GTCTGTCGCGGTGCCTGAAGCTGTCCC	3	0.2694	0.00274898	0	0	0.1233	0	0	0	0	0	0	0	0	0	0	0	0	0	0	0	0	0	0	0	0	0	0	0	0	0	0	0	0	0	0	0	0	0	0	0	0	0	0
mmu-mir-696_2_24_+	2	24	..TCTGTCGCGGTGCCTGAAGCTG................................................................	22	TCTGTCGCGGTGCCTGAAGCTG	3	0.3708	0.00378367	0	0	0	0.0539	0	0	0	0	0	0	0	0	0	0	0	0	0	0	0	0	0	0	0	0	0	0	0	0	0	0	0	0	0	0	0.2451	0	0	0	0	0	0
mmu-mir-696_5_26_+	5	26	.....GTCGCGGTGCCTGAAGCTGTC..............................................................	21	GTCGCGGTGCCTGAAGCTGTC	3	0.1451	0.00148061	0	0	0	0	0	0	0	0.0469	0.0982	0	0	0	0	0	0	0	0	0	0	0	0	0	0	0	0	0	0	0	0	0	0	0	0	0	0	0	0	0	0	0	0
mmu-mir-696_6_28_+	6	28	......TCGCGGTGCCTGAAGCTGTCCC............................................................	22	TCGCGGTGCCTGAAGCTGTCCC	3	0.1724	0.00175918	0	0	0.1233	0	0	0	0	0	0.0491	0	0	0	0	0	0	0	0	0	0	0	0	0	0	0	0	0	0	0	0	0	0	0	0	0	0	0	0	0	0	0	0
mmu-mir-696_8_28_+	8	28	........GCGGTGCCTGAAGCTGTCCC............................................................	20	GCGGTGCCTGAAGCTGTCCC	3	0.182	0.00185714	0.182	0	0	0	0	0	0	0	0	0	0	0	0	0	0	0	0	0	0	0	0	0	0	0	0	0	0	0	0	0	0	0	0	0	0	0	0	0	0	0	0
mmu-mir-696_8_29_+	8	29	........GCGGTGCCTGAAGCTGTCCCC...........................................................	21	GCGGTGCCTGAAGCTGTCCCC	3	0.185	0.00188776	0	0	0.185	0	0	0	0	0	0	0	0	0	0	0	0	0	0	0	0	0	0	0	0	0	0	0	0	0	0	0	0	0	0	0	0	0	0	0	0	0	0
mmu-mir-696_9_33_+	9	33	.........CGGTGCCTGAAGCTGTCCCCGAGC.......................................................	24	CGGTGCCTGAAGCTGTCCCCGAGC	3	0.1472	0.00150204	0	0	0	0	0	0	0	0	0.1472	0	0	0	0	0	0	0	0	0	0	0	0	0	0	0	0	0	0	0	0	0	0	0	0	0	0	0	0	0	0	0	0
mmu-mir-696_9_38_+	9	38	.........CGGTGCCTGAAGCTGTCCCCGAGCCACGC..................................................	29	CGGTGCCTGAAGCTGTCCCCGAGCCACGC	3	0.1482	0.00151224	0	0.1482	0	0	0	0	0	0	0	0	0	0	0	0	0	0	0	0	0	0	0	0	0	0	0	0	0	0	0	0	0	0	0	0	0	0	0	0	0	0	0
mmu-mir-696_11_31_+	11	31	...........GTGCCTGAAGCTGTCCCCGA.........................................................	20	GTGCCTGAAGCTGTCCCCGA	3	0.185	0.00188776	0	0	0.185	0	0	0	0	0	0	0	0	0	0	0	0	0	0	0	0	0	0	0	0	0	0	0	0	0	0	0	0	0	0	0	0	0	0	0	0	0	0
mmu-mir-696_12_31_+	12	31	............TGCCTGAAGCTGTCCCCGA.........................................................	19	TGCCTGAAGCTGTCCCCGA	3	0.185	0.00188776	0	0	0.185	0	0	0	0	0	0	0	0	0	0	0	0	0	0	0	0	0	0	0	0	0	0	0	0	0	0	0	0	0	0	0	0	0	0	0	0	0	0
mmu-mir-696_13_40_+	13	40	.............GCCTGAAGCTGTCCCCGAGCCACGCTT................................................	27	GCCTGAAGCTGTCCCCGAGCCACGCTT	3	13.5464	0.138229	0	0	0	0	0	0	0	0	0	0	0	0	0	0	0	0	0	0	0	0	0	0	0	0	0	0	0	0	0	0	0	0	0	0	0	0	0	0	0	0	0
mmu-mir-696_16_42_+	16	42	................TGAAGCTGTCCCCGAGCCACGCTTCC..............................................	26	TGAAGCTGTCCCCGAGCCACGCTTCC	3	1.0741	0.0109602	0	0	0	0	0	0	0	0	0	0	0	0	0	0	0	0	0	0	0	0	0	0	0	0	0	0	0	0	0	0	0	0	0	0	0	0	0	0	0	0	0
mmu-mir-696_17_36_+	17	36	.................GAAGCTGTCCCCGAGCCAC....................................................	19	GAAGCTGTCCCCGAGCCAC	3	0.706	0.00720408	0	0	0	0	0	0	0	0	0	0	0	0	0	0	0	0	0	0	0	0	0	0	0	0	0	0	0	0	0	0	0	0	0	0	0	0	0	0	0	0	0
mmu-mir-696_17_38_+	17	38	.................GAAGCTGTCCCCGAGCCACGC..................................................	21	GAAGCTGTCCCCGAGCCACGC	3	0.1326	0.00135306	0	0	0	0	0	0.1223	0	0	0	0	0	0	0	0	0	0	0	0	0	0	0	0	0	0	0	0	0	0	0	0	0	0	0	0	0	0	0	0	0	0	0
mmu-mir-696_17_39_+	17	39	.................GAAGCTGTCCCCGAGCCACGCT.................................................	22	GAAGCTGTCCCCGAGCCACGCT	3	0.3004	0.00306531	0	0	0	0	0	0	0	0	0	0	0	0	0	0	0	0	0	0	0	0	0	0	0	0	0	0	0	0	0	0	0	0	0	0	0	0	0	0	0	0	0
mmu-mir-696_29_58_+	29	58	.............................GAGCCACGCTTCCTGCTTTCCCGGGCTTG..............................	29	GAGCCACGCTTCCTGCTTTCCCGGGCTTG	3	0.182	0.00185714	0.182	0	0	0	0	0	0	0	0	0	0	0	0	0	0	0	0	0	0	0	0	0	0	0	0	0	0	0	0	0	0	0	0	0	0	0	0	0	0	0	0
mmu-mir-696_31_55_+	31	55	...............................GCCACGCTTCCTGCTTTCCCGGGC.................................	24	GCCACGCTTCCTGCTTTCCCGGGC	3	0.5773	0.00589082	0.0607	0	0	0	0	0	0	0	0	0	0	0	0	0	0	0	0	0	0	0	0	0	0	0	0	0	0	0	0	0	0	0	0	0	0	0	0	0	0	0	0
mmu-mir-696_35_56_+	35	56	...................................CGCTTCCTGCTTTCCCGGGCT................................	21	CGCTTCCTGCTTTCCCGGGCT	3	0.185	0.00188776	0	0	0.185	0	0	0	0	0	0	0	0	0	0	0	0	0	0	0	0	0	0	0	0	0	0	0	0	0	0	0	0	0	0	0	0	0	0	0	0	0	0
mmu-mir-696_35_64_+	35	64	...................................CGCTTCCTGCTTTCCCGGGCTTGCTGCTT........................	29	CGCTTCCTGCTTTCCCGGGCTTGCTGCTT	3	0.185	0.00188776	0	0	0.185	0	0	0	0	0	0	0	0	0	0	0	0	0	0	0	0	0	0	0	0	0	0	0	0	0	0	0	0	0	0	0	0	0	0	0	0	0	0
mmu-mir-696_37_64_+	37	64	.....................................CTTCCTGCTTTCCCGGGCTTGCTGCTT........................	27	CTTCCTGCTTTCCCGGGCTTGCTGCTT	3	0.1482	0.00151224	0	0.1482	0	0	0	0	0	0	0	0	0	0	0	0	0	0	0	0	0	0	0	0	0	0	0	0	0	0	0	0	0	0	0	0	0	0	0	0	0	0	0
mmu-mir-696_42_62_+	42	62	..........................................TGCTTTCCCGGGCTTGCTGC..........................	20	TGCTTTCCCGGGCTTGCTGC	3	0.7724	0.00788163	0	0.0494	0	0	0	0	0	0	0	0	0	0	0	0	0	0	0	0	0	0	0	0	0	0	0	0	0	0	0.723	0	0	0	0	0	0	0	0	0	0	0	0
mmu-mir-696_42_64_+	42	64	..........................................TGCTTTCCCGGGCTTGCTGCTT........................	22	TGCTTTCCCGGGCTTGCTGCTT	3	0.4553	0.00464592	0	0	0	0	0	0	0	0.0938	0	0	0	0	0	0	0	0	0	0	0	0	0	0	0	0	0	0	0	0	0.3615	0	0	0	0	0	0	0	0	0	0	0	0
mmu-mir-696_43_72_+	43	72	...........................................GCTTTCCCGGGCTTGCTGCTTGCGTGTGC................	29	GCTTTCCCGGGCTTGCTGCTTGCGTGTGC	3	0.6138	0.00626327	0	0	0	0	0	0	0	0	0	0	0	0	0	0	0	0	0	0	0	0	0	0	0	0	0	0	0	0	0.3615	0	0	0	0	0	0	0	0	0	0	0	0
mmu-mir-696_47_67_+	47	67	...............................................TCCCGGGCTTGCTGCTTGCG.....................	20	TCCCGGGCTTGCTGCTTGCG	3	0.185	0.00188776	0	0	0.185	0	0	0	0	0	0	0	0	0	0	0	0	0	0	0	0	0	0	0	0	0	0	0	0	0	0	0	0	0	0	0	0	0	0	0	0	0	0
mmu-mir-696_48_77_+	48	77	................................................CCCGGGCTTGCTGCTTGCGTGTGCTTGCT...........	29	CCCGGGCTTGCTGCTTGCGTGTGCTTGCT	3	0.1616	0.00164898	0	0	0	0.1616	0	0	0	0	0	0	0	0	0	0	0	0	0	0	0	0	0	0	0	0	0	0	0	0	0	0	0	0	0	0	0	0	0	0	0	0	0
mmu-mir-696_49_74_+	49	74	.................................................CCGGGCTTGCTGCTTGCGTGTGCTT..............	25	CCGGGCTTGCTGCTTGCGTGTGCTT	3	0.1594	0.00162653	0	0	0	0	0	0	0.1125	0.0469	0	0	0	0	0	0	0	0	0	0	0	0	0	0	0	0	0	0	0	0	0	0	0	0	0	0	0	0	0	0	0	0	0
mmu-mir-696_50_79_+	50	79	..................................................CGGGCTTGCTGCTTGCGTGTGCTTGCTGT.........	29	CGGGCTTGCTGCTTGCGTGTGCTTGCTGT	3	0.1482	0.00151224	0	0.1482	0	0	0	0	0	0	0	0	0	0	0	0	0	0	0	0	0	0	0	0	0	0	0	0	0	0	0	0	0	0	0	0	0	0	0	0	0	0	0
mmu-mir-696_54_78_+	54	78	......................................................CTTGCTGCTTGCGTGTGCTTGCTG..........	24	CTTGCTGCTTGCGTGTGCTTGCTG	3	0.1702	0.00173673	0	0	0.1233	0	0.0469	0	0	0	0	0	0	0	0	0	0	0	0	0	0	0	0	0	0	0	0	0	0	0	0	0	0	0	0	0	0	0	0	0	0	0	0
mmu-mir-696_56_78_+	56	78	........................................................TGCTGCTTGCGTGTGCTTGCTG..........	22	TGCTGCTTGCGTGTGCTTGCTG	3	0.2657	0.00271122	0	0	0	0	0	0	0	0	0.0982	0	0	0	0	0	0	0	0	0	0	0	0	0	0	0	0	0	0	0	0	0	0	0	0	0	0	0	0	0	0	0	0
mmu-mir-696_61_87_+	61	87	.............................................................CTTGCGTGTGCTTGCTGTGGGCAGCT.	26	CTTGCGTGTGCTTGCTGTGGGCAGCT	3	0.1429	0.00145816	0	0	0	0	0	0	0	0.0938	0.0491	0	0	0	0	0	0	0	0	0	0	0	0	0	0	0	0	0	0	0	0	0	0	0	0	0	0	0	0	0	0	0	0
mmu-mir-696_64_87_+	64	87	................................................................GCGTGTGCTTGCTGTGGGCAGCT.	23	GCGTGTGCTTGCTGTGGGCAGCT	3	0.2888	0.00294694	0	0	0	0	0	0	0	0	0	0	0	0	0	0	0	0	0	0	0	0	0	0	0	0	0	0	0	0	0	0	0	0	0	0	0	0	0	0	0	0	0
mmu-mir-696_0_24_+	0	24	GGTCTGTCGCGGTGCCTGAAGCTG................................................................	24	GGTCTGTCGCGGTGCCTGAAGCTG	2	0.103	0.00105102	0	0	0	0.0539	0	0	0	0	0.0491	0	0	0	0	0	0	0	0	0	0	0	0	0	0	0	0	0	0	0	0	0	0	0	0	0	0	0	0	0	0	0	0
mmu-mir-696_2_29_+	2	29	..TCTGTCGCGGTGCCTGAAGCTGTCCCC...........................................................	27	TCTGTCGCGGTGCCTGAAGCTGTCCCC	2	0.0988	0.00100816	0	0.0988	0	0	0	0	0	0	0	0	0	0	0	0	0	0	0	0	0	0	0	0	0	0	0	0	0	0	0	0	0	0	0	0	0	0	0	0	0	0	0
mmu-mir-696_5_23_+	5	23	.....GTCGCGGTGCCTGAAGCT.................................................................	18	GTCGCGGTGCCTGAAGCT	2	0.238	0.00242857	0	0	0	0	0	0	0	0	0	0	0	0	0	0	0	0	0	0	0	0	0	0	0	0	0	0	0	0	0	0	0	0	0	0	0	0	0	0	0	0	0
mmu-mir-696_5_29_+	5	29	.....GTCGCGGTGCCTGAAGCTGTCCCC...........................................................	24	GTCGCGGTGCCTGAAGCTGTCCCC	2	0.1233	0.00125816	0	0	0.1233	0	0	0	0	0	0	0	0	0	0	0	0	0	0	0	0	0	0	0	0	0	0	0	0	0	0	0	0	0	0	0	0	0	0	0	0	0	0
mmu-mir-696_7_28_+	7	28	.......CGCGGTGCCTGAAGCTGTCCC............................................................	21	CGCGGTGCCTGAAGCTGTCCC	2	0.1077	0.00109898	0	0	0	0.1077	0	0	0	0	0	0	0	0	0	0	0	0	0	0	0	0	0	0	0	0	0	0	0	0	0	0	0	0	0	0	0	0	0	0	0	0	0
mmu-mir-696_12_39_+	12	39	............TGCCTGAAGCTGTCCCCGAGCCACGCT.................................................	27	TGCCTGAAGCTGTCCCCGAGCCACGCT	2	0.0938	0.000957143	0	0	0	0	0	0	0	0.0938	0	0	0	0	0	0	0	0	0	0	0	0	0	0	0	0	0	0	0	0	0	0	0	0	0	0	0	0	0	0	0	0	0
mmu-mir-696_14_34_+	14	34	..............CCTGAAGCTGTCCCCGAGCC......................................................	20	CCTGAAGCTGTCCCCGAGCC	2	0.1782	0.00181837	0	0	0	0	0	0	0	0	0.0491	0	0	0	0	0	0	0	0	0	0	0	0	0	0	0	0	0	0	0	0	0	0	0	0	0	0	0	0	0	0	0	0
mmu-mir-696_14_37_+	14	37	..............CCTGAAGCTGTCCCCGAGCCACG...................................................	23	CCTGAAGCTGTCCCCGAGCCACG	2	0.096	0.000979592	0	0	0	0	0	0	0	0.0469	0.0491	0	0	0	0	0	0	0	0	0	0	0	0	0	0	0	0	0	0	0	0	0	0	0	0	0	0	0	0	0	0	0	0
mmu-mir-696_14_39_+	14	39	..............CCTGAAGCTGTCCCCGAGCCACGCT.................................................	25	CCTGAAGCTGTCCCCGAGCCACGCT	2	0.0938	0.000957143	0	0	0	0	0	0	0	0.0938	0	0	0	0	0	0	0	0	0	0	0	0	0	0	0	0	0	0	0	0	0	0	0	0	0	0	0	0	0	0	0	0	0
mmu-mir-696_15_38_+	15	38	...............CTGAAGCTGTCCCCGAGCCACGC..................................................	23	CTGAAGCTGTCCCCGAGCCACGC	2	0.0572	0.000583673	0	0	0	0	0	0	0	0.0469	0	0	0	0	0	0	0	0	0	0	0	0	0	0	0	0	0	0	0	0	0	0	0	0	0	0	0	0	0	0	0	0	0
mmu-mir-696_15_43_+	15	43	...............CTGAAGCTGTCCCCGAGCCACGCTTCCT.............................................	28	CTGAAGCTGTCCCCGAGCCACGCTTCCT	2	4.2792	0.0436653	0	0	0	0	0	0	0	0	0	0	0	0	0	0	0	0	0	0	0	0	0	0	0	0	0	0	0	0	0	0	0	0	0	0	0	0	0	0	0	0	0
mmu-mir-696_16_36_+	16	36	................TGAAGCTGTCCCCGAGCCAC....................................................	20	TGAAGCTGTCCCCGAGCCAC	2	0.205	0.00209184	0	0	0	0	0	0	0	0	0	0	0	0	0	0	0	0	0	0	0	0	0	0	0	0	0	0	0	0	0	0	0	0	0	0	0	0	0	0	0	0	0
mmu-mir-696_19_49_+	19	49	...................AGCTGTCCCCGAGCCACGCTTCCTGCTTTC.......................................	30	AGCTGTCCCCGAGCCACGCTTCCTGCTTTC	2	38.4867	0.392721	0	0	0	0	0	0	0	0	0	0	0	0	0	0	0	0	0	0	0	0	0	0	0	0	0	0	0	0	0	0	0	0	0	0	0	0	0	0	0	0	0
mmu-mir-696_21_41_+	21	41	.....................CTGTCCCCGAGCCACGCTTC...............................................	20	CTGTCCCCGAGCCACGCTTC	2	0.723	0.00737755	0	0	0	0	0	0	0	0	0	0	0	0	0	0	0	0	0	0	0	0	0	0	0	0	0	0	0	0	0.723	0	0	0	0	0	0	0	0	0	0	0	0
mmu-mir-696_21_42_+	21	42	.....................CTGTCCCCGAGCCACGCTTCC..............................................	21	CTGTCCCCGAGCCACGCTTCC	2	0.723	0.00737755	0	0	0	0	0	0	0	0	0	0	0	0	0	0	0	0	0	0	0	0	0	0	0	0	0	0	0	0	0.723	0	0	0	0	0	0	0	0	0	0	0	0
mmu-mir-696_27_53_+	27	53	...........................CCGAGCCACGCTTCCTGCTTTCCCGG...................................	26	CCGAGCCACGCTTCCTGCTTTCCCGG	2	0.0982	0.00100204	0	0	0	0	0	0	0	0	0.0982	0	0	0	0	0	0	0	0	0	0	0	0	0	0	0	0	0	0	0	0	0	0	0	0	0	0	0	0	0	0	0	0
mmu-mir-696_32_55_+	32	55	................................CCACGCTTCCTGCTTTCCCGGGC.................................	23	CCACGCTTCCTGCTTTCCCGGGC	2	0.2214	0.00225918	0	0	0	0.0539	0	0	0	0	0	0	0	0	0	0	0	0	0	0	0	0	0	0	0	0	0	0	0	0	0	0	0	0	0	0	0	0	0	0	0	0	0
mmu-mir-696_37_60_+	37	60	.....................................CTTCCTGCTTTCCCGGGCTTGCT............................	23	CTTCCTGCTTTCCCGGGCTTGCT	2	0.0938	0.000957143	0	0	0	0	0	0	0	0.0938	0	0	0	0	0	0	0	0	0	0	0	0	0	0	0	0	0	0	0	0	0	0	0	0	0	0	0	0	0	0	0	0	0
mmu-mir-696_38_60_+	38	60	......................................TTCCTGCTTTCCCGGGCTTGCT............................	22	TTCCTGCTTTCCCGGGCTTGCT	2	0.0988	0.00100816	0	0.0988	0	0	0	0	0	0	0	0	0	0	0	0	0	0	0	0	0	0	0	0	0	0	0	0	0	0	0	0	0	0	0	0	0	0	0	0	0	0	0
mmu-mir-696_40_59_+	40	59	........................................CCTGCTTTCCCGGGCTTGC.............................	19	CCTGCTTTCCCGGGCTTGC	2	0.1059	0.00108061	0	0	0	0	0	0	0	0.0469	0	0	0	0	0	0	0	0	0	0	0	0	0	0	0	0	0	0	0	0	0	0	0	0	0	0	0	0	0	0	0	0	0
mmu-mir-696_41_61_+	41	61	.........................................CTGCTTTCCCGGGCTTGCTG...........................	20	CTGCTTTCCCGGGCTTGCTG	2	0.1213	0.00123776	0.1213	0	0	0	0	0	0	0	0	0	0	0	0	0	0	0	0	0	0	0	0	0	0	0	0	0	0	0	0	0	0	0	0	0	0	0	0	0	0	0	0
mmu-mir-696_43_65_+	43	65	...........................................GCTTTCCCGGGCTTGCTGCTTG.......................	22	GCTTTCCCGGGCTTGCTGCTTG	2	0.723	0.00737755	0	0	0	0	0	0	0	0	0	0	0	0	0	0	0	0	0	0	0	0	0	0	0	0	0	0	0	0	0.723	0	0	0	0	0	0	0	0	0	0	0	0
mmu-mir-696_45_74_+	45	74	.............................................TTTCCCGGGCTTGCTGCTTGCGTGTGCTT..............	29	TTTCCCGGGCTTGCTGCTTGCGTGTGCTT	2	0.1077	0.00109898	0	0	0	0.1077	0	0	0	0	0	0	0	0	0	0	0	0	0	0	0	0	0	0	0	0	0	0	0	0	0	0	0	0	0	0	0	0	0	0	0	0	0
mmu-mir-696_45_75_+	45	75	.............................................TTTCCCGGGCTTGCTGCTTGCGTGTGCTTG.............	30	TTTCCCGGGCTTGCTGCTTGCGTGTGCTTG	2	0.1156	0.00117959	0	0	0.0617	0.0539	0	0	0	0	0	0	0	0	0	0	0	0	0	0	0	0	0	0	0	0	0	0	0	0	0	0	0	0	0	0	0	0	0	0	0	0	0
mmu-mir-696_46_73_+	46	73	..............................................TTCCCGGGCTTGCTGCTTGCGTGTGCT...............	27	TTCCCGGGCTTGCTGCTTGCGTGTGCT	2	0.1125	0.00114796	0	0	0	0	0	0	0.1125	0	0	0	0	0	0	0	0	0	0	0	0	0	0	0	0	0	0	0	0	0	0	0	0	0	0	0	0	0	0	0	0	0	0
mmu-mir-696_46_76_+	46	76	..............................................TTCCCGGGCTTGCTGCTTGCGTGTGCTTGC............	30	TTCCCGGGCTTGCTGCTTGCGTGTGCTTGC	2	0.0982	0.00100204	0	0	0	0	0	0	0	0	0.0982	0	0	0	0	0	0	0	0	0	0	0	0	0	0	0	0	0	0	0	0	0	0	0	0	0	0	0	0	0	0	0	0
mmu-mir-696_47_68_+	47	68	...............................................TCCCGGGCTTGCTGCTTGCGT....................	21	TCCCGGGCTTGCTGCTTGCGT	2	0.1213	0.00123776	0.1213	0	0	0	0	0	0	0	0	0	0	0	0	0	0	0	0	0	0	0	0	0	0	0	0	0	0	0	0	0	0	0	0	0	0	0	0	0	0	0	0
mmu-mir-696_50_75_+	50	75	..................................................CGGGCTTGCTGCTTGCGTGTGCTTG.............	25	CGGGCTTGCTGCTTGCGTGTGCTTG	2	0.0938	0.000957143	0	0	0	0	0.0938	0	0	0	0	0	0	0	0	0	0	0	0	0	0	0	0	0	0	0	0	0	0	0	0	0	0	0	0	0	0	0	0	0	0	0	0
mmu-mir-696_53_78_+	53	78	.....................................................GCTTGCTGCTTGCGTGTGCTTGCTG..........	25	GCTTGCTGCTTGCGTGTGCTTGCTG	2	0.0938	0.000957143	0	0	0	0	0.0938	0	0	0	0	0	0	0	0	0	0	0	0	0	0	0	0	0	0	0	0	0	0	0	0	0	0	0	0	0	0	0	0	0	0	0	0
mmu-mir-696_56_74_+	56	74	........................................................TGCTGCTTGCGTGTGCTT..............	18	TGCTGCTTGCGTGTGCTT	2	0.3349	0.00341735	0	0	0	0	0	0	0	0	0	0	0	0	0	0	0	0	0	0	0	0	0	0	0	0	0	0	0	0	0	0	0	0	0	0	0	0	0	0	0	0	0
mmu-mir-696_57_83_+	57	83	.........................................................GCTGCTTGCGTGTGCTTGCTGTGGGC.....	26	GCTGCTTGCGTGTGCTTGCTGTGGGC	2	0.1233	0.00125816	0	0	0.1233	0	0	0	0	0	0	0	0	0	0	0	0	0	0	0	0	0	0	0	0	0	0	0	0	0	0	0	0	0	0	0	0	0	0	0	0	0	0
mmu-mir-696_59_84_+	59	84	...........................................................TGCTTGCGTGTGCTTGCTGTGGGCA....	25	TGCTTGCGTGTGCTTGCTGTGGGCA	2	0.4534	0.00462653	0	0	0	0	0	0	0	0	0	0	0	0	0	0	0	0	0	0	0	0	0	0	0	0	0	0	0	0	0.3615	0	0	0	0	0	0	0	0	0	0	0	0
mmu-mir-696_60_82_+	60	82	............................................................GCTTGCGTGTGCTTGCTGTGGG......	22	GCTTGCGTGTGCTTGCTGTGGG	2	0.53	0.00540816	0	0	0	0	0	0	0	0	0	0	0	0	0	0	0	0	0	0	0	0	0	0	0	0	0	0	0	0	0.3615	0	0	0	0	0	0	0	0	0	0	0	0
mmu-mir-696_61_86_+	61	86	.............................................................CTTGCGTGTGCTTGCTGTGGGCAGC..	25	CTTGCGTGTGCTTGCTGTGGGCAGC	2	0.1233	0.00125816	0	0	0.1233	0	0	0	0	0	0	0	0	0	0	0	0	0	0	0	0	0	0	0	0	0	0	0	0	0	0	0	0	0	0	0	0	0	0	0	0	0	0
mmu-mir-696_62_83_+	62	83	..............................................................TTGCGTGTGCTTGCTGTGGGC.....	21	TTGCGTGTGCTTGCTGTGGGC	2	0.0988	0.00100816	0	0.0988	0	0	0	0	0	0	0	0	0	0	0	0	0	0	0	0	0	0	0	0	0	0	0	0	0	0	0	0	0	0	0	0	0	0	0	0	0	0	0
mmu-mir-696_62_84_+	62	84	..............................................................TTGCGTGTGCTTGCTGTGGGCA....	22	TTGCGTGTGCTTGCTGTGGGCA	2	0.1213	0.00123776	0.1213	0	0	0	0	0	0	0	0	0	0	0	0	0	0	0	0	0	0	0	0	0	0	0	0	0	0	0	0	0	0	0	0	0	0	0	0	0	0	0	0
mmu-mir-696_62_85_+	62	85	..............................................................TTGCGTGTGCTTGCTGTGGGCAG...	23	TTGCGTGTGCTTGCTGTGGGCAG	2	0.723	0.00737755	0	0	0	0	0	0	0	0	0	0	0	0	0	0	0	0	0	0	0	0	0	0	0	0	0	0	0	0	0.723	0	0	0	0	0	0	0	0	0	0	0	0
mmu-mir-696_63_82_+	63	82	...............................................................TGCGTGTGCTTGCTGTGGG......	19	TGCGTGTGCTTGCTGTGGG	2	0.723	0.00737755	0	0	0	0	0	0	0	0	0	0	0	0	0	0	0	0	0	0	0	0	0	0	0	0	0	0	0	0	0.723	0	0	0	0	0	0	0	0	0	0	0	0
mmu-mir-696_64_83_+	64	83	................................................................GCGTGTGCTTGCTGTGGGC.....	19	GCGTGTGCTTGCTGTGGGC	2	0.3146	0.0032102	0	0	0	0	0	0	0	0	0	0	0	0	0	0	0	0	0	0	0	0	0	0	0	0	0	0	0	0	0	0	0	0	0	0	0	0	0	0	0	0	0
mmu-mir-696_65_85_+	65	85	.................................................................CGTGTGCTTGCTGTGGGCAG...	20	CGTGTGCTTGCTGTGGGCAG	2	0.0982	0.00100204	0	0	0	0	0	0	0	0	0.0982	0	0	0	0	0	0	0	0	0	0	0	0	0	0	0	0	0	0	0	0	0	0	0	0	0	0	0	0	0	0	0	0
mmu-mir-696_67_87_+	67	87	...................................................................TGTGCTTGCTGTGGGCAGCT.	20	TGTGCTTGCTGTGGGCAGCT	2	0.0988	0.00100816	0	0.0988	0	0	0	0	0	0	0	0	0	0	0	0	0	0	0	0	0	0	0	0	0	0	0	0	0	0	0	0	0	0	0	0	0	0	0	0	0	0	0
mmu-mir-696_5_25_+	5	25	.....GTCGCGGTGCCTGAAGCTGT...............................................................	20	GTCGCGGTGCCTGAAGCTGT	1	0.669	0.00682653	0	0	0	0	0	0	0	0	0	0	0	0	0	0	0	0	0	0	0	0.669	0	0	0	0	0	0	0	0	0	0	0	0	0	0	0	0	0	0	0	0	0
mmu-mir-696_5_28_+	5	28	.....GTCGCGGTGCCTGAAGCTGTCCC............................................................	23	GTCGCGGTGCCTGAAGCTGTCCC	1	0.0491	0.00050102	0	0	0	0	0	0	0	0	0.0491	0	0	0	0	0	0	0	0	0	0	0	0	0	0	0	0	0	0	0	0	0	0	0	0	0	0	0	0	0	0	0	0
mmu-mir-696_6_26_+	6	26	......TCGCGGTGCCTGAAGCTGTC..............................................................	20	TCGCGGTGCCTGAAGCTGTC	1	0.0617	0.000629592	0	0	0.0617	0	0	0	0	0	0	0	0	0	0	0	0	0	0	0	0	0	0	0	0	0	0	0	0	0	0	0	0	0	0	0	0	0	0	0	0	0	0
mmu-mir-696_6_29_+	6	29	......TCGCGGTGCCTGAAGCTGTCCCC...........................................................	23	TCGCGGTGCCTGAAGCTGTCCCC	1	0.0607	0.000619388	0.0607	0	0	0	0	0	0	0	0	0	0	0	0	0	0	0	0	0	0	0	0	0	0	0	0	0	0	0	0	0	0	0	0	0	0	0	0	0	0	0	0
mmu-mir-696_7_29_+	7	29	.......CGCGGTGCCTGAAGCTGTCCCC...........................................................	22	CGCGGTGCCTGAAGCTGTCCCC	1	0.0539	0.00055	0	0	0	0.0539	0	0	0	0	0	0	0	0	0	0	0	0	0	0	0	0	0	0	0	0	0	0	0	0	0	0	0	0	0	0	0	0	0	0	0	0	0
mmu-mir-696_10_40_+	10	40	..........GGTGCCTGAAGCTGTCCCCGAGCCACGCTT................................................	30	GGTGCCTGAAGCTGTCCCCGAGCCACGCTT	1	19.2434	0.196361	0	0	0	0	0	0	0	0	0	0	0	0	0	0	0	0	0	0	0	0	0	0	0	0	0	0	0	0	0	0	0	0	0	0	0	0	0	0	0	0	0
mmu-mir-696_11_34_+	11	34	...........GTGCCTGAAGCTGTCCCCGAGCC......................................................	23	GTGCCTGAAGCTGTCCCCGAGCC	1	1.1943	0.0121867	0	0	0	0	0	0	0	0	0	0	0	0	0	0	0	0	0	0	0	0	0	0	0	0	0	0	0	0	0	0	0	0	0	0	0	0	0	0	0	0	0
mmu-mir-696_11_36_+	11	36	...........GTGCCTGAAGCTGTCCCCGAGCCAC....................................................	25	GTGCCTGAAGCTGTCCCCGAGCCAC	1	2.1396	0.0218327	0	0	0	0	0	0	0	0	0	0	0	0	0	0	0	0	0	0	0	0	0	0	0	0	0	0	0	0	0	0	0	0	0	0	0	0	0	0	0	0	0
mmu-mir-696_11_38_+	11	38	...........GTGCCTGAAGCTGTCCCCGAGCCACGC..................................................	27	GTGCCTGAAGCTGTCCCCGAGCCACGC	1	4.5155	0.0460765	0	0	0	0	0	0	0	0	0	0	0	0	0	0	0	0	0	0	0	0	0	0	0	0	0	0	0	0	0	0	0	0	0	0	0	0	0	0	0	0	0
mmu-mir-696_13_33_+	13	33	.............GCCTGAAGCTGTCCCCGAGC.......................................................	20	GCCTGAAGCTGTCCCCGAGC	1	0.0494	0.000504082	0	0.0494	0	0	0	0	0	0	0	0	0	0	0	0	0	0	0	0	0	0	0	0	0	0	0	0	0	0	0	0	0	0	0	0	0	0	0	0	0	0	0
mmu-mir-696_13_43_+	13	43	.............GCCTGAAGCTGTCCCCGAGCCACGCTTCCT.............................................	30	GCCTGAAGCTGTCCCCGAGCCACGCTTCCT	1	1.1943	0.0121867	0	0	0	0	0	0	0	0	0	0	0	0	0	0	0	0	0	0	0	0	0	0	0	0	0	0	0	0	0	0	0	0	0	0	0	0	0	0	0	0	0
mmu-mir-696_14_36_+	14	36	..............CCTGAAGCTGTCCCCGAGCCAC....................................................	22	CCTGAAGCTGTCCCCGAGCCAC	1	0.0469	0.000478571	0	0	0	0	0	0	0	0.0469	0	0	0	0	0	0	0	0	0	0	0	0	0	0	0	0	0	0	0	0	0	0	0	0	0	0	0	0	0	0	0	0	0
mmu-mir-696_15_34_+	15	34	...............CTGAAGCTGTCCCCGAGCC......................................................	19	CTGAAGCTGTCCCCGAGCC	1	0.0469	0.000478571	0	0	0	0	0	0	0	0.0469	0	0	0	0	0	0	0	0	0	0	0	0	0	0	0	0	0	0	0	0	0	0	0	0	0	0	0	0	0	0	0	0	0
mmu-mir-696_15_35_+	15	35	...............CTGAAGCTGTCCCCGAGCCA.....................................................	20	CTGAAGCTGTCCCCGAGCCA	1	0.0491	0.00050102	0	0	0	0	0	0	0	0	0.0491	0	0	0	0	0	0	0	0	0	0	0	0	0	0	0	0	0	0	0	0	0	0	0	0	0	0	0	0	0	0	0	0
mmu-mir-696_15_37_+	15	37	...............CTGAAGCTGTCCCCGAGCCACG...................................................	22	CTGAAGCTGTCCCCGAGCCACG	1	0.0469	0.000478571	0	0	0	0	0	0	0	0.0469	0	0	0	0	0	0	0	0	0	0	0	0	0	0	0	0	0	0	0	0	0	0	0	0	0	0	0	0	0	0	0	0	0
mmu-mir-696_15_45_+	15	45	...............CTGAAGCTGTCCCCGAGCCACGCTTCCTGC...........................................	30	CTGAAGCTGTCCCCGAGCCACGCTTCCTGC	1	0.1481	0.00151122	0	0	0	0	0	0	0	0	0	0	0	0	0	0	0	0	0	0	0	0	0	0	0	0	0	0	0	0	0	0	0	0	0	0	0	0	0	0	0	0	0
mmu-mir-696_16_34_+	16	34	................TGAAGCTGTCCCCGAGCC......................................................	18	TGAAGCTGTCCCCGAGCC	1	0.0607	0.000619388	0.0607	0	0	0	0	0	0	0	0	0	0	0	0	0	0	0	0	0	0	0	0	0	0	0	0	0	0	0	0	0	0	0	0	0	0	0	0	0	0	0	0
mmu-mir-696_18_38_+	18	38	..................AAGCTGTCCCCGAGCCACGC..................................................	20	AAGCTGTCCCCGAGCCACGC	1	0.0924	0.000942857	0	0	0	0	0	0	0	0	0	0	0	0	0	0	0	0	0	0	0	0	0	0	0	0	0	0	0	0	0	0	0	0	0	0	0	0	0	0	0	0	0
mmu-mir-696_21_51_+	21	51	.....................CTGTCCCCGAGCCACGCTTCCTGCTTTCCC.....................................	30	CTGTCCCCGAGCCACGCTTCCTGCTTTCCC	1	0.0539	0.00055	0	0	0	0.0539	0	0	0	0	0	0	0	0	0	0	0	0	0	0	0	0	0	0	0	0	0	0	0	0	0	0	0	0	0	0	0	0	0	0	0	0	0
mmu-mir-696_23_41_+	23	41	.......................GTCCCCGAGCCACGCTTC...............................................	18	GTCCCCGAGCCACGCTTC	1	0.3615	0.00368878	0	0	0	0	0	0	0	0	0	0	0	0	0	0	0	0	0	0	0	0	0	0	0	0	0	0	0	0	0.3615	0	0	0	0	0	0	0	0	0	0	0	0
mmu-mir-696_24_45_+	24	45	........................TCCCCGAGCCACGCTTCCTGC...........................................	21	TCCCCGAGCCACGCTTCCTGC	1	0.0469	0.000478571	0	0	0	0	0	0	0	0.0469	0	0	0	0	0	0	0	0	0	0	0	0	0	0	0	0	0	0	0	0	0	0	0	0	0	0	0	0	0	0	0	0	0
mmu-mir-696_25_45_+	25	45	.........................CCCCGAGCCACGCTTCCTGC...........................................	20	CCCCGAGCCACGCTTCCTGC	1	0.1062	0.00108367	0	0	0	0	0	0	0	0	0	0	0	0	0	0	0	0	0	0	0	0	0	0	0	0	0	0	0	0	0	0	0	0	0	0	0	0	0	0	0	0	0
mmu-mir-696_25_46_+	25	46	.........................CCCCGAGCCACGCTTCCTGCT..........................................	21	CCCCGAGCCACGCTTCCTGCT	1	0.1675	0.00170918	0	0	0	0	0	0	0	0	0	0	0	0	0	0	0	0	0	0	0	0	0	0	0	0	0	0	0	0	0	0	0	0	0	0	0	0	0	0	0	0	0
mmu-mir-696_26_50_+	26	50	..........................CCCGAGCCACGCTTCCTGCTTTCC......................................	24	CCCGAGCCACGCTTCCTGCTTTCC	1	0.1126	0.00114898	0	0	0	0	0	0	0	0	0	0	0	0	0	0	0	0	0	0	0	0	0	0	0	0	0	0	0	0	0	0	0	0	0	0	0	0	0	0	0	0	0
mmu-mir-696_33_53_+	33	53	.................................CACGCTTCCTGCTTTCCCGG...................................	20	CACGCTTCCTGCTTTCCCGG	1	0.1481	0.00151122	0	0	0	0	0	0	0	0	0	0	0	0	0	0	0	0	0	0	0	0	0	0	0	0	0	0	0	0	0	0	0	0	0	0	0	0	0	0	0	0	0
mmu-mir-696_33_59_+	33	59	.................................CACGCTTCCTGCTTTCCCGGGCTTGC.............................	26	CACGCTTCCTGCTTTCCCGGGCTTGC	1	0.0491	0.00050102	0	0	0	0	0	0	0	0	0.0491	0	0	0	0	0	0	0	0	0	0	0	0	0	0	0	0	0	0	0	0	0	0	0	0	0	0	0	0	0	0	0	0
mmu-mir-696_37_57_+	37	57	.....................................CTTCCTGCTTTCCCGGGCTT...............................	20	CTTCCTGCTTTCCCGGGCTT	1	0.1062	0.00108367	0	0	0	0	0	0	0	0	0	0	0	0	0	0	0	0	0	0	0	0	0	0	0	0	0	0	0	0	0	0	0	0	0	0	0	0	0	0	0	0	0
mmu-mir-696_37_58_+	37	58	.....................................CTTCCTGCTTTCCCGGGCTTG..............................	21	CTTCCTGCTTTCCCGGGCTTG	1	0.0469	0.000478571	0	0	0	0	0	0	0	0.0469	0	0	0	0	0	0	0	0	0	0	0	0	0	0	0	0	0	0	0	0	0	0	0	0	0	0	0	0	0	0	0	0	0
mmu-mir-696_38_62_+	38	62	......................................TTCCTGCTTTCCCGGGCTTGCTGC..........................	24	TTCCTGCTTTCCCGGGCTTGCTGC	1	0.1894	0.00193265	0	0	0	0	0	0	0	0	0	0	0	0	0	0	0	0	0	0	0	0	0	0	0	0	0	0	0	0	0	0	0	0	0	0.1894	0	0	0	0	0	0	0
mmu-mir-696_41_63_+	41	63	.........................................CTGCTTTCCCGGGCTTGCTGCT.........................	22	CTGCTTTCCCGGGCTTGCTGCT	1	0.3615	0.00368878	0	0	0	0	0	0	0	0	0	0	0	0	0	0	0	0	0	0	0	0	0	0	0	0	0	0	0	0	0.3615	0	0	0	0	0	0	0	0	0	0	0	0
mmu-mir-696_43_69_+	43	69	...........................................GCTTTCCCGGGCTTGCTGCTTGCGTG...................	26	GCTTTCCCGGGCTTGCTGCTTGCGTG	1	0.0491	0.00050102	0	0	0	0	0	0	0	0	0.0491	0	0	0	0	0	0	0	0	0	0	0	0	0	0	0	0	0	0	0	0	0	0	0	0	0	0	0	0	0	0	0	0
mmu-mir-696_44_72_+	44	72	............................................CTTTCCCGGGCTTGCTGCTTGCGTGTGC................	28	CTTTCCCGGGCTTGCTGCTTGCGTGTGC	1	0.0491	0.00050102	0	0	0	0	0	0	0	0	0.0491	0	0	0	0	0	0	0	0	0	0	0	0	0	0	0	0	0	0	0	0	0	0	0	0	0	0	0	0	0	0	0	0
mmu-mir-696_44_73_+	44	73	............................................CTTTCCCGGGCTTGCTGCTTGCGTGTGCT...............	29	CTTTCCCGGGCTTGCTGCTTGCGTGTGCT	1	0.0539	0.00055	0	0	0	0.0539	0	0	0	0	0	0	0	0	0	0	0	0	0	0	0	0	0	0	0	0	0	0	0	0	0	0	0	0	0	0	0	0	0	0	0	0	0
mmu-mir-696_46_70_+	46	70	..............................................TTCCCGGGCTTGCTGCTTGCGTGT..................	24	TTCCCGGGCTTGCTGCTTGCGTGT	1	0.0491	0.00050102	0	0	0	0	0	0	0	0	0.0491	0	0	0	0	0	0	0	0	0	0	0	0	0	0	0	0	0	0	0	0	0	0	0	0	0	0	0	0	0	0	0	0
mmu-mir-696_47_65_+	47	65	...............................................TCCCGGGCTTGCTGCTTG.......................	18	TCCCGGGCTTGCTGCTTG	1	0.0607	0.000619388	0.0607	0	0	0	0	0	0	0	0	0	0	0	0	0	0	0	0	0	0	0	0	0	0	0	0	0	0	0	0	0	0	0	0	0	0	0	0	0	0	0	0
mmu-mir-696_48_68_+	48	68	................................................CCCGGGCTTGCTGCTTGCGT....................	20	CCCGGGCTTGCTGCTTGCGT	1	0.3247	0.00331327	0	0	0	0	0	0	0	0	0	0	0	0	0	0	0	0	0	0	0	0	0	0	0	0	0	0	0	0	0	0	0	0	0	0	0	0	0	0	0	0	0
mmu-mir-696_48_70_+	48	70	................................................CCCGGGCTTGCTGCTTGCGTGT..................	22	CCCGGGCTTGCTGCTTGCGTGT	1	0.3247	0.00331327	0	0	0	0	0	0	0	0	0	0	0	0	0	0	0	0	0	0	0	0	0	0	0	0	0	0	0	0	0	0	0	0	0	0	0	0	0	0	0	0	0
mmu-mir-696_50_73_+	50	73	..................................................CGGGCTTGCTGCTTGCGTGTGCT...............	23	CGGGCTTGCTGCTTGCGTGTGCT	1	0.0491	0.00050102	0	0	0	0	0	0	0	0	0.0491	0	0	0	0	0	0	0	0	0	0	0	0	0	0	0	0	0	0	0	0	0	0	0	0	0	0	0	0	0	0	0	0
mmu-mir-696_53_71_+	53	71	.....................................................GCTTGCTGCTTGCGTGTG.................	18	GCTTGCTGCTTGCGTGTG	1	0.0696	0.000710204	0	0	0	0	0	0	0	0	0	0	0	0	0	0	0	0	0	0	0	0	0	0	0	0	0	0	0	0	0	0	0	0	0	0	0	0	0	0	0	0	0
mmu-mir-696_56_75_+	56	75	........................................................TGCTGCTTGCGTGTGCTTG.............	19	TGCTGCTTGCGTGTGCTTG	1	0.3615	0.00368878	0	0	0	0	0	0	0	0	0	0	0	0	0	0	0	0	0	0	0	0	0	0	0	0	0	0	0	0	0.3615	0	0	0	0	0	0	0	0	0	0	0	0
mmu-mir-696_56_84_+	56	84	........................................................TGCTGCTTGCGTGTGCTTGCTGTGGGCA....	28	TGCTGCTTGCGTGTGCTTGCTGTGGGCA	1	0.0539	0.00055	0	0	0	0.0539	0	0	0	0	0	0	0	0	0	0	0	0	0	0	0	0	0	0	0	0	0	0	0	0	0	0	0	0	0	0	0	0	0	0	0	0	0
mmu-mir-696_57_76_+	57	76	.........................................................GCTGCTTGCGTGTGCTTGC............	19	GCTGCTTGCGTGTGCTTGC	1	0.0924	0.000942857	0	0	0	0	0	0	0	0	0	0	0	0	0	0	0	0	0	0	0	0	0	0	0	0	0	0	0	0	0	0	0	0	0	0	0	0	0	0	0	0	0
mmu-mir-696_57_77_+	57	77	.........................................................GCTGCTTGCGTGTGCTTGCT...........	20	GCTGCTTGCGTGTGCTTGCT	1	0.1675	0.00170918	0	0	0	0	0	0	0	0	0	0	0	0	0	0	0	0	0	0	0	0	0	0	0	0	0	0	0	0	0	0	0	0	0	0	0	0	0	0	0	0	0
mmu-mir-696_57_79_+	57	79	.........................................................GCTGCTTGCGTGTGCTTGCTGT.........	22	GCTGCTTGCGTGTGCTTGCTGT	1	0.1675	0.00170918	0	0	0	0	0	0	0	0	0	0	0	0	0	0	0	0	0	0	0	0	0	0	0	0	0	0	0	0	0	0	0	0	0	0	0	0	0	0	0	0	0
mmu-mir-696_59_78_+	59	78	...........................................................TGCTTGCGTGTGCTTGCTG..........	19	TGCTTGCGTGTGCTTGCTG	1	0.0494	0.000504082	0	0.0494	0	0	0	0	0	0	0	0	0	0	0	0	0	0	0	0	0	0	0	0	0	0	0	0	0	0	0	0	0	0	0	0	0	0	0	0	0	0	0
mmu-mir-696_59_81_+	59	81	...........................................................TGCTTGCGTGTGCTTGCTGTGG.......	22	TGCTTGCGTGTGCTTGCTGTGG	1	0.0612	0.00062449	0	0	0	0	0	0.0612	0	0	0	0	0	0	0	0	0	0	0	0	0	0	0	0	0	0	0	0	0	0	0	0	0	0	0	0	0	0	0	0	0	0	0
mmu-mir-696_59_82_+	59	82	...........................................................TGCTTGCGTGTGCTTGCTGTGGG......	23	TGCTTGCGTGTGCTTGCTGTGGG	1	0.1983	0.00202347	0	0	0	0	0	0	0	0	0	0	0	0	0	0	0	0	0	0	0	0	0	0	0	0	0	0	0	0	0	0	0	0	0	0	0	0	0	0	0	0	0
mmu-mir-696_59_87_+	59	87	...........................................................TGCTTGCGTGTGCTTGCTGTGGGCAGCT.	28	TGCTTGCGTGTGCTTGCTGTGGGCAGCT	1	19.2434	0.196361	0	0	0	0	0	0	0	0	0	0	0	0	0	0	0	0	0	0	0	0	0	0	0	0	0	0	0	0	0	0	0	0	0	0	0	0	0	0	0	0	0
mmu-mir-696_60_79_+	60	79	............................................................GCTTGCGTGTGCTTGCTGT.........	19	GCTTGCGTGTGCTTGCTGT	1	0.4247	0.00433367	0	0	0	0	0	0	0	0	0	0	0	0	0	0	0	0	0	0	0	0	0	0	0	0	0	0	0	0	0	0	0	0	0	0	0	0	0	0	0	0	0
mmu-mir-696_60_83_+	60	83	............................................................GCTTGCGTGTGCTTGCTGTGGGC.....	23	GCTTGCGTGTGCTTGCTGTGGGC	1	0.0103	0.000105102	0	0	0	0	0	0	0	0	0	0	0	0	0	0	0	0	0	0	0	0	0	0	0	0	0	0	0	0	0	0	0	0	0	0	0	0	0	0	0	0	0
mmu-mir-696_60_84_+	60	84	............................................................GCTTGCGTGTGCTTGCTGTGGGCA....	24	GCTTGCGTGTGCTTGCTGTGGGCA	1	0.1967	0.00200714	0	0	0	0	0	0	0	0	0	0	0	0	0	0	0	0	0	0	0	0	0	0	0	0	0	0	0	0	0	0	0	0	0	0	0	0	0	0	0	0	0
mmu-mir-696_60_87_+	60	87	............................................................GCTTGCGTGTGCTTGCTGTGGGCAGCT.	27	GCTTGCGTGTGCTTGCTGTGGGCAGCT	1	0.1253	0.00127857	0	0	0	0	0	0	0	0	0	0	0	0	0	0	0	0	0	0	0	0	0	0	0	0	0	0	0	0	0	0	0	0	0	0	0	0	0	0	0	0	0
mmu-mir-696_62_81_+	62	81	..............................................................TTGCGTGTGCTTGCTGTGG.......	19	TTGCGTGTGCTTGCTGTGG	1	0.0722	0.000736735	0	0	0	0	0	0	0	0	0	0	0	0	0	0	0	0	0	0	0	0	0	0	0	0	0	0	0	0	0	0	0	0	0	0	0	0	0	0	0	0	0
mmu-mir-696_63_81_+	63	81	...............................................................TGCGTGTGCTTGCTGTGG.......	18	TGCGTGTGCTTGCTGTGG	1	0.1983	0.00202347	0	0	0	0	0	0	0	0	0	0	0	0	0	0	0	0	0	0	0	0	0	0	0	0	0	0	0	0	0	0	0	0	0	0	0	0	0	0	0	0	0
mmu-mir-696_63_85_+	63	85	...............................................................TGCGTGTGCTTGCTGTGGGCAG...	22	TGCGTGTGCTTGCTGTGGGCAG	1	0.08	0.000816327	0	0	0	0	0	0	0	0	0	0	0	0	0	0	0	0	0	0	0	0	0	0	0	0	0	0	0	0	0	0	0	0	0	0	0	0	0	0	0	0	0
mmu-mir-696_64_85_+	64	85	................................................................GCGTGTGCTTGCTGTGGGCAG...	21	GCGTGTGCTTGCTGTGGGCAG	1	0.1685	0.00171939	0	0	0	0	0	0	0	0	0	0	0	0	0	0	0	0	0	0	0	0	0	0	0	0	0	0	0	0	0	0	0	0	0	0	0	0	0	0	0	0	0
mmu-mir-696_64_88_+	64	88	................................................................GCGTGTGCTTGCTGTGGGCAGCTT	24	GCGTGTGCTTGCTGTGGGCAGCTT	1	0.1675	0.00170918	0	0	0	0	0	0	0	0	0	0	0	0	0	0	0	0	0	0	0	0	0	0	0	0	0	0	0	0	0	0	0	0	0	0	0	0	0	0	0	0	0
mmu-mir-696_66_87_+	66	87	..................................................................GTGTGCTTGCTGTGGGCAGCT.	21	GTGTGCTTGCTGTGGGCAGCT	1	0.0924	0.000942857	0	0	0	0	0	0	0	0	0	0	0	0	0	0	0	0	0	0	0	0	0	0	0	0	0	0	0	0	0	0	0	0	0	0	0	0	0	0	0	0	0
mmu-mir-696_68_86_+	68	86	....................................................................GTGCTTGCTGTGGGCAGC..	18	GTGCTTGCTGTGGGCAGC	1	0.1126	0.00114898	0	0	0	0	0	0	0	0	0	0	0	0	0	0	0	0	0	0	0	0	0	0	0	0	0	0	0	0	0	0	0	0	0	0	0	0	0	0	0	0	0
mmu-mir-696_68_88_+	68	88	....................................................................GTGCTTGCTGTGGGCAGCTT	20	GTGCTTGCTGTGGGCAGCTT	1	0.4247	0.00433367	0	0	0	0	0	0	0	0	0	0	0	0	0	0	0	0	0	0	0	0	0	0	0	0	0	0	0	0	0	0	0	0	0	0	0	0	0	0	0	0	0
mmu-mir-696_69_87_+	69	87	.....................................................................TGCTTGCTGTGGGCAGCT.	18	TGCTTGCTGTGGGCAGCT	1	0.104	0.00106122	0	0	0	0	0	0	0	0	0	0	0	0	0	0	0	0	0	0	0	0	0	0	0	0	0	0	0	0	0	0	0	0	0	0	0	0	0	0	0	0	0
[truncated: 57 more columns]

## Sheet: mmu-mir-712
key	start0based	stop1based	mmu-mir-712	sequencelength	sequence	sumcount	sumnormRPMmirpre	Average (RPM normalized by miRNA mapping reads)	SRR640602.GSM1057530: ES_NI; Mus musculus; RNA-Seq	SRR640603.GSM1057531: ES_EMCV 3hrs; Mus musculus; RNA-Seq	SRR640604.GSM1057532: ES_EMCV 6hrs; Mus musculus; RNA-Seq	SRR640605.GSM1057533: ES_D0 INF; Mus musculus; RNA-Seq	SRR640606.GSM1057534: ES_D10 NI; Mus musculus; RNA-Seq	SRR640607.GSM1057535: ES_D10 INF; Mus musculus; RNA-Seq	SRR640612.GSM1057540: IP_mAGO2_INF; Mus musculus; RNA-Seq	SRR640614.GSM1057542: ES_NoV; Mus musculus; RNA-Seq	SRR640615.GSM1057543: ES_NoVÃ«Ã“B2; Mus musculus; RNA-Seq	SRR037904.GSM510440: brain_rep1	SRR037905.GSM510441: brain_rep2	SRR037906.GSM510442: brain_rep3	SRR037907.GSM510443: brain_rep4	SRR037919.GSM510457: e12p5_rep1	SRR037920.GSM510458: e12p5_rep2	SRR037921.GSM510459: e12p5_rep3	SRR037922.GSM510460: e12p5_rep4	SRR037923.GSM510461: e9p5_rep1	SRR037924.GSM510462: e9p5_rep2	SRR037925.GSM510463: e9p5_rep3	SRR037926.GSM510464: e9p5_rep4	SRR037927.GSM510465: e7p5_rep1	SRR037928.GSM510466: e7p5_rep2	SRR037929.GSM510467: e7p5_rep3	SRR037930.GSM510468: e7p5_rep4	SRR038741.GSM527276: DGCR8_wt_hippocampus	SRR038744.GSM527279: DGCR8_wt_cortex	SRR039610.GSM527274: DICER_wt_hippocampus	SRR040488.GSM533911: E18.5 wild type LIVER small RNA	SRR042477.GSM539869: mouse brain tissue [09-002]	SRR042482.GSM539874: mouse skin tissue [09-002]	SRR069834.GSM304914: Analysis of small RNAs in murine neutrophils cultured in vitro by Solexa/Illumina genome analyzer	SRR206939.GSM723280: NAc_saline_smallRNA	SRR206940.GSM723281: NAc_cocaine_smallRNA	SRR206941.GSM723282: PSD_saline_smallRNA	SRR206942.GSM723283: PSD_cocaine_smallRNA	SRR306526.GSM750569: Cerebellum_1	SRR306527.GSM750570: Cerebellum_2	SRR306528.GSM750571: Cerebellum_3	SRR306529.GSM750572: Purkinje_1	SRR306530.GSM750573: Purkinje_2
key	start0based	stop1based	TCTCCGCTTCTCCTTCACCCGGGCGGTACCCGCTCCGGCGCCGGCCCGCGGGACGCCGCGGCGTCCGTGCGCCGATGCGAGTCACCCCCGGGTGTTGCGAGTTCGGGGA	sequencelength	sequence	sumcount	sumnormRPMmirpre	average normRPMmirpre	SRR640602.NormRPMmirpre	SRR640603.NormRPMmirpre	SRR640604.NormRPMmirpre	SRR640605.NormRPMmirpre	SRR640606.NormRPMmirpre	SRR640607.NormRPMmirpre	SRR640612.NormRPMmirpre	SRR640614.NormRPMmirpre	SRR640615.NormRPMmirpre	SRR037904.NormRPMmirpre	SRR037905.NormRPMmirpre	SRR037906.NormRPMmirpre	SRR037907.NormRPMmirpre	SRR037919.NormRPMmirpre	SRR037920.NormRPMmirpre	SRR037921.NormRPMmirpre	SRR037922.NormRPMmirpre	SRR037923.NormRPMmirpre	SRR037924.NormRPMmirpre	SRR037925.NormRPMmirpre	SRR037926.NormRPMmirpre	SRR037927.NormRPMmirpre	SRR037928.NormRPMmirpre	SRR037929.NormRPMmirpre	SRR037930.NormRPMmirpre	SRR038741.NormRPMmirpre	SRR038744.NormRPMmirpre	SRR039610.NormRPMmirpre	SRR040488.NormRPMmirpre	SRR042477.NormRPMmirpre	SRR042482.NormRPMmirpre	SRR069834.NormRPMmirpre	SRR206939.NormRPMmirpre	SRR206940.NormRPMmirpre	SRR206941.NormRPMmirpre	SRR206942.NormRPMmirpre	SRR306526.NormRPMmirpre	SRR306527.NormRPMmirpre	SRR306528.NormRPMmirpre	SRR306529.NormRPMmirpre	SRR306530.NormRPMmirpre
mmu-mir-712_81_101_+	81	101	.................................................................................TCACCCCCGGGTGTTGCGAG........	20	TCACCCCCGGGTGTTGCGAG	1844	241.623	2.46554	0	0	0	0	0	0	0	0	0	0	0	0	0	0	3.6377	5.1595	0	3.0202	0	0	0	5.4913	2.6325	0.7304	4.3361	0	0	0	1.446	0	0	2.7683	0	0	0	0	0	0	0	0	0
mmu-mir-712_75_94_+	75	94	...........................................................................TGCGAGTCACCCCCGGGTG...............	19	TGCGAGTCACCCCCGGGTG	1395	167.191	1.70603	0	0	0	0	0	0	0	0	0	0	0	0	0	0	0	0	0	0	0	0	0	0	0	0	0	0	0	0	0	0	0	0	0	0	0	0	0	0	0	0	0
mmu-mir-712_75_96_+	75	96	...........................................................................TGCGAGTCACCCCCGGGTGTT.............	21	TGCGAGTCACCCCCGGGTGTT	1046	102.255	1.04342	0	0	0	0	0	0	0	0	0	0	0	0	0	0	0	0	0	0	0	0	0	0	0	0	0	0	0	0	0	0	0	0	0	0	0	0	0	0	0	0	0
mmu-mir-712_75_101_+	75	101	...........................................................................TGCGAGTCACCCCCGGGTGTTGCGAG........	26	TGCGAGTCACCCCCGGGTGTTGCGAG	800	159.771	1.63032	0	0	0	0	0	0	0	0	0	0	0	0	0	0	0	0	0	0	0.7244	1.338	0	0	0	0	0	0	0	0	0	0	0	0	0	0	0	0	0	0	0	0	0
mmu-mir-712_76_101_+	76	101	............................................................................GCGAGTCACCCCCGGGTGTTGCGAG........	25	GCGAGTCACCCCCGGGTGTTGCGAG	710	219.877	2.24365	0	0	0	0	0	0	0	0	0	0	0	0	0	0	0	0.7371	0	0	0	0	0	0	0	0	0	0	0	0	0	0	0	0	0	0	0	0	0	0	0	0	0
mmu-mir-712_75_95_+	75	95	...........................................................................TGCGAGTCACCCCCGGGTGT..............	20	TGCGAGTCACCCCCGGGTGT	641	68.175	0.695663	0	0	0	0	0	0	0	0	0	0	0	0	0	0	0	0	0	0	0	0	0	0	0	0	0	0	0	0	0.3615	0	0	0	0	0	0	0	0	0	0	0	0
mmu-mir-712_29_48_+	29	48	.............................CCGCTCCGGCGCCGGCCCG.............................................................	19	CCGCTCCGGCGCCGGCCCG	376	21.9569	0.22405	3.6392	2.6182	3.7004	1.185	0.2346	0.3058	5.1734	1.5471	2.0121	0	0	0	0	0	0.9094	0	0	0	0	0	0	0	0	0	0	0	0	0	0.3615	0	0	0	0	0	0	0	0	0	0	0	0
mmu-mir-712_37_63_+	37	63	.....................................GCGCCGGCCCGCGGGACGCCGCGGCG..............................................	26	GCGCCGGCCCGCGGGACGCCGCGGCG	325	44.7475	0.456607	0	0	0	0	0	0	0	0	0	0	0	0	0	0	0	0	0	0	0	0	0	0	0	0	0	0	0	0	0	0	0	0	0	0	0	0	0	0	0	0	0
mmu-mir-712_76_94_+	76	94	............................................................................GCGAGTCACCCCCGGGTG...............	18	GCGAGTCACCCCCGGGTG	322	42.4558	0.433222	0	0	0.185	0	0	0	0	0.0469	0	0	0	0	0	0	0	0	0	3.0202	0	0.669	0	0	0	0	0	0	0	0	0	0	0	0	0	0	0	0	0	0	0	0	0
mmu-mir-712_58_81_+	58	81	..........................................................CGGCGTCCGTGCGCCGATGCGAG............................	23	CGGCGTCCGTGCGCCGATGCGAG	303	46.4219	0.473693	0	0	0.2467	0	0	0	0	0	0.0491	0	0	0	0	0	1.8188	0	0	6.0404	0	2.007	0	0	1.755	0	0	0	0	0	5.4226	0	0	0	0	0	0	0	0	0	0	0.938	0
mmu-mir-712_35_63_+	35	63	...................................CGGCGCCGGCCCGCGGGACGCCGCGGCG..............................................	28	CGGCGCCGGCCCGCGGGACGCCGCGGCG	302	16.8208	0.171641	2.1229	5.8292	7.4625	0.1077	0	0.0612	0	0.7032	0.4417	0	0	0	0	0	0	0	0	0	0	0	0	0	0	0	0	0	0	0	0	0	0	0	0	0	0	0	0	0	0	0	0
mmu-mir-712_38_63_+	38	63	......................................CGCCGGCCCGCGGGACGCCGCGGCG..............................................	25	CGCCGGCCCGCGGGACGCCGCGGCG	296	35.1009	0.358172	1.2131	0.6916	0.6784	0	0	0.0612	0	0.1406	0.1963	0	0	0	0	0	0	0	0	0	0.7244	0	0	0	0	0	0	0	0	0	0	0	0	2.7683	0	0	0	0	0	0	0	0	0
mmu-mir-712_17_35_+	17	35	.................CCCGGGCGGTACCCGCTC..........................................................................	18	CCCGGGCGGTACCCGCTC	283	15.5263	0.158432	3.2753	1.976	2.8987	1.3466	1.595	1.5291	0	1.2658	1.4723	0	0	0	0	0	0	0	0	0	0	0	0	0	0	0	0	0	0	0	0	0	0	0	0	0	0	0	0	0	0	0	0
mmu-mir-712_75_100_+	75	100	...........................................................................TGCGAGTCACCCCCGGGTGTTGCGA.........	25	TGCGAGTCACCCCCGGGTGTTGCGA	280	63.8452	0.651482	0	0	0	0	0	0	0	0	0	0	0	0	0	0	0	0	0	0	0.7244	0	0	0	0	0	0	0	0	0	0	0	0	0	0	0	0	0	0	0	0	0	0
mmu-mir-712_58_82_+	58	82	..........................................................CGGCGTCCGTGCGCCGATGCGAGT...........................	24	CGGCGTCCGTGCGCCGATGCGAGT	262	46.3542	0.473002	0.3639	0.0988	0	0	0	0	0	0.0938	0.1472	0	0	0.6999	0	0	3.6377	0.7371	5.6348	0	0	0	0	0	0	0	0	0	0	0	6.8686	0	0	0	0	0	0	0	0	0	0	0	0
mmu-mir-712_12_31_+	12	31	............CTTCACCCGGGCGGTACCC..............................................................................	19	CTTCACCCGGGCGGTACCC	251	14.5836	0.148812	4.3064	2.5688	5.2423	0.5925	0.2346	0.4281	0.2249	0.2813	0.2945	0	0	0	0	0	0	0	0	0	0	0	0	0	0	0	0	0	0	0	0	0	0	0	0	0	0	0	0	0	0	0	0
mmu-mir-712_12_30_+	12	30	............CTTCACCCGGGCGGTACC...............................................................................	18	CTTCACCCGGGCGGTACC	209	12.6886	0.129476	2.4261	3.0628	4.7489	0.4848	0.3753	0.1835	0	0.2344	0.1472	0	0	0	0	0	0	0	0	0	0	0	0	0	0.8775	0	0	0	0	0	0	0	0	0	0	0	0	0	0	0	0	0	0
mmu-mir-712_39_63_+	39	63	.......................................GCCGGCCCGCGGGACGCCGCGGCG..............................................	24	GCCGGCCCGCGGGACGCCGCGGCG	193	22.8326	0.232986	0	0.0494	0	0	0	0	0	0.1406	0	0	0	0	0	0	0	0	0	0	0	0	0	0	0	0	0	0	0	0	0	0	0	0	0	0	0	0	0	0	0	0	0
mmu-mir-712_15_35_+	15	35	...............CACCCGGGCGGTACCCGCTC..........................................................................	20	CACCCGGGCGGTACCCGCTC	187	11.9788	0.122233	0.9098	0.4446	1.9119	1.9391	1.0789	0.7951	0.2249	1.4533	0.7361	0	0	0	0	0	0	0	0	0	0	0	0	0	0	0	0	0	0	0	0	0	0	0	0	0	0	0	0	0	0	0	0
mmu-mir-712_14_33_+	14	33	..............TCACCCGGGCGGTACCCGC............................................................................	19	TCACCCGGGCGGTACCCGC	156	33.5411	0.342256	0.1213	0.3458	0	0	0	0	0	0.1875	0.1963	0	0	0	0	0	0	0	0	0	0	0	0	0	0	0	0	0	0	0	0	0	0	0	0	0	0	0	0	0	0	0	0
mmu-mir-712_75_98_+	75	98	...........................................................................TGCGAGTCACCCCCGGGTGTTGC...........	23	TGCGAGTCACCCCCGGGTGTTGC	141	14.2553	0.145462	0	0	0	0	0	0	0	0	0	0	0	0	0	0	0	0	0	0	0	0	0	0	0	0	0	0	0	0	0	0	0	0	0	0	0	0	0	0	0	0	0
mmu-mir-712_83_101_+	83	101	...................................................................................ACCCCCGGGTGTTGCGAG........	18	ACCCCCGGGTGTTGCGAG	134	27.1981	0.277532	0	0.0494	0	0	0.0469	0.4281	0	0.2344	0	0	0	0	0	0	0	0	0	0	0	0	0	0	0	0	0	0	0	0	0.723	0	0	0	0	0	0	0	0	0	0	0	0
mmu-mir-712_29_50_+	29	50	.............................CCGCTCCGGCGCCGGCCCGCG...........................................................	21	CCGCTCCGGCGCCGGCCCGCG	132	11.481	0.117153	1.8803	0.7904	1.9119	0.0539	0	0	0	0.2813	0.638	0	0	0	0	0	0	0	0	0	0.7244	0.669	0	0	0	0	0	0	0	0	0	0	0	0	0	0	0	0	0	0	0.5471	0	0
mmu-mir-712_29_49_+	29	49	.............................CCGCTCCGGCGCCGGCCCGC............................................................	20	CCGCTCCGGCGCCGGCCCGC	131	7.3188	0.0746816	1.2131	0.4446	1.2952	0.1077	0	0.1223	0.8435	0.1406	0.3435	0	0	0	0	0	0	0	0	0	0	0	0	0	0	0	0	0	0	0	0.3615	0	0	0	0	0	0	0	0	0	0	0	0.3895
mmu-mir-712_15_45_+	15	45	...............CACCCGGGCGGTACCCGCTCCGGCGCCGGC................................................................	30	CACCCGGGCGGTACCCGCTCCGGCGCCGGC	127	6.8694	0.0700959	0.8491	1.1362	1.7269	0.6464	0.2815	0.2447	0.3936	0.6095	0.9815	0	0	0	0	0	0	0	0	0	0	0	0	0	0	0	0	0	0	0	0	0	0	0	0	0	0	0	0	0	0	0	0
mmu-mir-712_29_57_+	29	57	.............................CCGCTCCGGCGCCGGCCCGCGGGACGCC....................................................	28	CCGCTCCGGCGCCGGCCCGCGGGACGCC	125	6.8569	0.0699684	2.1229	2.1242	1.1718	0.2155	0	0	0.5061	0.4219	0.2945	0	0	0	0	0	0	0	0	0	0	0	0	0	0	0	0	0	0	0	0	0	0	0	0	0	0	0	0	0	0	0	0
mmu-mir-712_14_36_+	14	36	..............TCACCCGGGCGGTACCCGCTCC.........................................................................	22	TCACCCGGGCGGTACCCGCTCC	124	23.5088	0.239886	0	0	0	0	0.0469	0	0	0	0	0	0	0	0	0	0	0	0	0	0	0	0	0	0	0	0	0	0	0	0	0	0	0	0	0	0	0	0	0	0	0	0
mmu-mir-712_81_106_+	81	106	.................................................................................TCACCCCCGGGTGTTGCGAGTTCGG...	25	TCACCCCCGGGTGTTGCGAGTTCGG	123	12.9779	0.132428	0	0	0	0	0	0	0	0	0	0	0	0	0	0	0.9094	0.7371	0	0	0	0	3.9189	0	0	0	0	0	0	0	0.3615	0	0	0	0	0.1894	0	0	0	0	0	0	0
mmu-mir-712_16_45_+	16	45	................ACCCGGGCGGTACCCGCTCCGGCGCCGGC................................................................	29	ACCCGGGCGGTACCCGCTCCGGCGCCGGC	120	6.2373	0.0636459	0.8491	0.9386	0.6784	0.377	0	0.2447	0.3374	1.7815	1.0306	0	0	0	0	0	0	0	0	0	0	0	0	0	0	0	0	0	0	0	0	0	0	0	0	0	0	0	0	0	0	0	0
mmu-mir-712_16_46_+	16	46	................ACCCGGGCGGTACCCGCTCCGGCGCCGGCC...............................................................	30	ACCCGGGCGGTACCCGCTCCGGCGCCGGCC	118	6.4478	0.0657939	1.0918	0.3952	1.4185	1.0234	0.1876	0.2447	0.5623	0.9845	0.5398	0	0	0	0	0	0	0	0	0	0	0	0	0	0	0	0	0	0	0	0	0	0	0	0	0	0	0	0	0	0	0	0
mmu-mir-712_48_77_+	48	77	................................................CGGGACGCCGCGGCGTCCGTGCGCCGATG................................	29	CGGGACGCCGCGGCGTCCGTGCGCCGATG	117	6.5442	0.0667776	0	0.0494	0	0	0	0	6.3542	0.1406	0	0	0	0	0	0	0	0	0	0	0	0	0	0	0	0	0	0	0	0	0	0	0	0	0	0	0	0	0	0	0	0	0
mmu-mir-712_35_56_+	35	56	...................................CGGCGCCGGCCCGCGGGACGC.....................................................	21	CGGCGCCGGCCCGCGGGACGC	110	6.817	0.0695612	2.0016	1.5314	2.0969	0	0	0	0	0.0938	0.3435	0	0	0	0	0	0	0	0	0	0	0	0	0	0	0	0	0	0	0	0	0	0	0	0	0	0.2451	0	0	0	0	0	0
mmu-mir-712_41_63_+	41	63	.........................................CGGCCCGCGGGACGCCGCGGCG..............................................	22	CGGCCCGCGGGACGCCGCGGCG	110	9.5602	0.0975531	1.395	1.2844	1.6652	0	0	0	0	0.5157	0.4417	0	0	0	0	0	0	0	0	0	0	0	0	0	0	0	0	0	0	0	0	0	0	0	0	0	0	0	0	0	0	0	0
mmu-mir-712_27_47_+	27	47	...........................ACCCGCTCCGGCGCCGGCCC..............................................................	20	ACCCGCTCCGGCGCCGGCCC	107	31.9841	0.326368	0	0	0	0	0.0938	0	0	0.3282	0	0	0	0	0	0	0	0	0	0	0	0	0	0	0	0	0	0	0	0	0	0	0	0	0	0	0	0	0	0	0	0	0
mmu-mir-712_12_35_+	12	35	............CTTCACCCGGGCGGTACCCGCTC..........................................................................	23	CTTCACCCGGGCGGTACCCGCTC	105	5.7087	0.058252	0.8491	1.2844	0.7401	0.2155	0.6098	0.367	0.6748	0.2813	0.4908	0	0	0	0	0	0	0	0	0	0	0	0	0	0	0	0	0	0	0	0	0	0	0	0	0	0	0	0	0	0	0	0
mmu-mir-712_76_100_+	76	100	............................................................................GCGAGTCACCCCCGGGTGTTGCGA.........	24	GCGAGTCACCCCCGGGTGTTGCGA	105	30.2777	0.308956	0	0	0	0	0	0	0	0	0	0	0	0	0	0	0	0	0	0	0	0	0	0	0	0	0	0	0	0	1.0845	0	0	0	0	0	0	0	0	0	0	0	0
mmu-mir-712_15_36_+	15	36	...............CACCCGGGCGGTACCCGCTCC.........................................................................	21	CACCCGGGCGGTACCCGCTCC	103	23.1884	0.236616	0	0	0	0.1616	0	0	0	0.0469	0	0	0	0	0	0	0	0	0	0	0	0	0	0	0	0	0	0	0	0	0	0	0	0	0	0	0	0	0	0	0	0	0
mmu-mir-712_17_46_+	17	46	.................CCCGGGCGGTACCCGCTCCGGCGCCGGCC...............................................................	29	CCCGGGCGGTACCCGCTCCGGCGCCGGCC	102	5.3297	0.0543847	0	1.4326	0.37	1.2389	0	0.0612	1.1246	0.5626	0.5398	0	0	0	0	0	0	0	0	0	0	0	0	0	0	0	0	0	0	0	0	0	0	0	0	0	0	0	0	0	0	0	0
mmu-mir-712_35_61_+	35	61	...................................CGGCGCCGGCCCGCGGGACGCCGCGG................................................	26	CGGCGCCGGCCCGCGGGACGCCGCGG	92	24.6205	0.25123	0.8491	1.1856	1.4185	0	0	0	0.7872	0.5157	0.1963	0	0	0	0	0	0	0	0	0	0	0	0	0	0	0	0	0	0	0	0	0	0	0	0	0	0	0	0	0	0	0	0
mmu-mir-712_35_54_+	35	54	...................................CGGCGCCGGCCCGCGGGAC.......................................................	19	CGGCGCCGGCCCGCGGGAC	88	8.1226	0.0828837	1.0311	0.7904	1.1718	0.0539	0.0938	0.0612	0.3374	0.2344	0.1472	0	0	0	0	0	0	0	0	0	0	0	0	0	0	0	0	0	0	0	0.3615	0	0	0	0	0	0	0	0	0	0	0	0
mmu-mir-712_58_80_+	58	80	..........................................................CGGCGTCCGTGCGCCGATGCGA.............................	22	CGGCGTCCGTGCGCCGATGCGA	86	55.49	0.566224	0	0	0	0	0	0	0	0	0.0491	4.1806	0	2.0996	2.975	11.3696	7.2754	3.6854	5.6348	0	0.7244	0.669	0	0	0	1.4607	0	0	0	0	9.3992	0	0	2.7683	0	0	0	0	0	0	0	0	0
mmu-mir-712_29_47_+	29	47	.............................CCGCTCCGGCGCCGGCCC..............................................................	18	CCGCTCCGGCGCCGGCCC	81	5.138	0.0524286	0.7278	0.6916	1.5418	0.3232	0.0938	0.2447	0	0.3751	0.3926	0	0	0	0	0	0	0.7371	0	0	0	0	0	0	0	0	0	0	0	0	0	0	0	0	0	0	0	0	0	0	0	0	0
mmu-mir-712_38_62_+	38	62	......................................CGCCGGCCCGCGGGACGCCGCGGC...............................................	24	CGCCGGCCCGCGGGACGCCGCGGC	77	9.2387	0.0942724	0	0	0	0	0	0	0	0.0469	0	0	0	0	0	0	0	0	0	0	0	0	0	0	0	0	0	0	0	0	0	0	0	0	0	0	0	0	0	0	0	0	0
mmu-mir-712_13_35_+	13	35	.............TTCACCCGGGCGGTACCCGCTC..........................................................................	22	TTCACCCGGGCGGTACCCGCTC	75	4.1108	0.0419469	0.5459	0.1976	0.9868	1.6159	0.2346	0.0612	0	0.4688	0	0	0	0	0	0	0	0	0	0	0	0	0	0	0	0	0	0	0	0	0	0	0	0	0	0	0	0	0	0	0	0	0
mmu-mir-712_9_33_+	9	33	.........CTCCTTCACCCGGGCGGTACCCGC............................................................................	24	CTCCTTCACCCGGGCGGTACCCGC	73	15.6267	0.159456	0	0	0	0.0539	0	0	0	0	0.0491	0	0	0	0	0	0	0	0	0	0	0	0	0	0	0	0	0	0	0	0	0	0	0	0	0	0	0	0	0	0	0	0
mmu-mir-712_19_38_+	19	38	...................CGGGCGGTACCCGCTCCGG.......................................................................	19	CGGGCGGTACCCGCTCCGG	73	10.3628	0.105743	0.182	0	0	0	0.0938	0	0	0.0938	0.2454	0	0	0	0	0	0	0	0	0	0	0	0	0	0	0	0	0	0	0	0	0	0	0	0.3182	0.1894	0.2451	0	0	0	0	0	0
mmu-mir-712_8_33_+	8	33	........TCTCCTTCACCCGGGCGGTACCCGC............................................................................	25	TCTCCTTCACCCGGGCGGTACCCGC	72	18.1504	0.185208	0	0.2964	0	0.0539	0	0	0	0.0938	0.0982	0	0	0	0	0	0	0	0	0	0	0	0	0	0	0	0	0	0	0	0	0	0	0	0	0	0	0	0	0	0	0	0
mmu-mir-712_27_53_+	27	53	...........................ACCCGCTCCGGCGCCGGCCCGCGGGA........................................................	26	ACCCGCTCCGGCGCCGGCCCGCGGGA	71	25.8134	0.263402	0	0	0	0	0	0	0	0	0	0	0	0	0	0	0	0	0	0	0	0	0	0	0	0	0	0	0	0	0	0	0	0	0	0	0	0	0	0	0	0	0
mmu-mir-712_39_62_+	39	62	.......................................GCCGGCCCGCGGGACGCCGCGGC...............................................	23	GCCGGCCCGCGGGACGCCGCGGC	67	11.8511	0.12093	0	0	0	0	0	0	0	0.1406	0	0	0	0	0	0	0	0	0	3.0202	0	1.338	0	0	0	0	0	0	0	0	0	0	0	0	0	0	0	0	0	0	0	0	0
mmu-mir-712_80_101_+	80	101	................................................................................GTCACCCCCGGGTGTTGCGAG........	21	GTCACCCCCGGGTGTTGCGAG	67	7.668	0.0782449	0	0	0	0	0	0	0	0	0	0	0	0	0	0	0	0	0	0	0	0	0	0	0	0	0	0	0	0	0	0	0	0	0	0	0	0	0	0	0	0	0
mmu-mir-712_30_48_+	30	48	..............................CGCTCCGGCGCCGGCCCG.............................................................	18	CGCTCCGGCGCCGGCCCG	66	3.9463	0.0402684	0.6672	0.5434	0.8634	0.377	0.0469	0.0612	0.4499	0.2813	0.2945	0	0	0	0	0	0	0	0	0	0	0	0	0	0	0	0	0	0	0	0.3615	0	0	0	0	0	0	0	0	0	0	0	0
mmu-mir-712_17_45_+	17	45	.................CCCGGGCGGTACCCGCTCCGGCGCCGGC................................................................	28	CCCGGGCGGTACCCGCTCCGGCGCCGGC	65	3.4847	0.0355582	0.1213	0.4446	0.6167	0.3232	0.0469	0	1.0684	0.4219	0.4417	0	0	0	0	0	0	0	0	0	0	0	0	0	0	0	0	0	0	0	0	0	0	0	0	0	0	0	0	0	0	0	0
mmu-mir-712_37_62_+	37	62	.....................................GCGCCGGCCCGCGGGACGCCGCGGC...............................................	25	GCGCCGGCCCGCGGGACGCCGCGGC	64	9.0702	0.0925531	0	0	0	0	0	0	0	0	0	0	0	0	0	0	0	0	0	0	0	0	0	0	0	0	0	0	0	0	0	0	0	0	0	0	0	0	0	0	0	0	0
mmu-mir-712_8_26_+	8	26	........TCTCCTTCACCCGGGCGG...................................................................................	18	TCTCCTTCACCCGGGCGG	61	9.4483	0.0964112	0	0.0988	0.5551	0	0	0	0	0.0938	0	0	0	0	0	0	0	0	0	0	0	0	0	0	0	0	0	0	0	0	0	0	0	0	0	0	0	0	0	0	0	0	0
mmu-mir-712_14_35_+	14	35	..............TCACCCGGGCGGTACCCGCTC..........................................................................	21	TCACCCGGGCGGTACCCGCTC	61	7.4015	0.0755255	0	0.0494	0.185	0.1077	0.5629	0.0612	0.8435	0	0.0491	0	0	0	0	0	0	0	0	0	0	0	0	0	0	0	0	0	0	0	0	0	0	0	0	0	0	0	0	0	0	0	0
mmu-mir-712_27_54_+	27	54	...........................ACCCGCTCCGGCGCCGGCCCGCGGGAC.......................................................	27	ACCCGCTCCGGCGCCGGCCCGCGGGAC	61	21.9247	0.223721	0	0	0	0	0	0	0	0	0	0	0	0	0	0	0	0	0	0	0	0	0	0	0	0	0	0	0	0	0	0	0	0	0	0	0	0	0	0	0	0	0
mmu-mir-712_16_35_+	16	35	................ACCCGGGCGGTACCCGCTC..........................................................................	19	ACCCGGGCGGTACCCGCTC	60	3.6053	0.0367888	0.4246	0.1482	0.37	0.4848	0.2815	0.4893	0	0.4688	0.3926	0	0	0	0	0	0	0	0	0	0	0	0	0	0	0	0	0	0	0	0.3615	0	0	0	0	0	0	0	0	0	0	0	0
mmu-mir-712_81_100_+	81	100	.................................................................................TCACCCCCGGGTGTTGCGA.........	19	TCACCCCCGGGTGTTGCGA	60	80.2027	0.818395	0	0	0	0	0.1407	0	0	0	0	0	0	0	0	0	0.9094	2.2112	0	0	0.7244	1.338	0	10.9825	4.3875	5.8429	13.0084	0	0	0	0	0	0	5.5366	0	0	0	0	0	0	0	0	0
mmu-mir-712_35_55_+	35	55	...................................CGGCGCCGGCCCGCGGGACG......................................................	20	CGGCGCCGGCCCGCGGGACG	59	3.7277	0.0380378	0.9098	0.1976	1.6652	0	0.0469	0	0	0.1406	0.2454	0	0	0	0	0	0	0	0	0	0	0	0	0	0	0	0	0	0	0	0	0	0	0	0	0	0	0	0	0	0	0	0
mmu-mir-712_53_73_+	53	73	.....................................................CGCCGCGGCGTCCGTGCGCC....................................	20	CGCCGCGGCGTCCGTGCGCC	59	3.2555	0.0332194	0.4852	1.4326	0.6784	0	0.0469	0.0612	0.2249	0.0938	0.0491	0	0	0	0	0	0	0	0	0	0	0	0	0	0	0	0	0	0	0	0	0	0	0	0	0	0	0	0	0	0	0	0
mmu-mir-712_40_63_+	40	63	........................................CCGGCCCGCGGGACGCCGCGGCG..............................................	23	CCGGCCCGCGGGACGCCGCGGCG	58	3.6815	0.0375663	0.0607	0.7904	1.0485	0	0	0	0.5623	0.0938	0.4417	0	0	0	0	0	0	0	0	0	0	0	0	0	0	0	0	0	0	0	0	0	0	0	0	0	0	0	0	0	0	0	0
mmu-mir-712_26_48_+	26	48	..........................TACCCGCTCCGGCGCCGGCCCG.............................................................	22	TACCCGCTCCGGCGCCGGCCCG	57	12.0894	0.123361	0	0.1976	0	0	0.2346	0	0.3374	0	0	0	0	0	0	0	0	0	0	0	0	0	0	0	0	0	0	0	0	0	0.3615	0	0	0	0	0	0	0	0	0.2973	1.6413	0.938	1.9477
mmu-mir-712_59_82_+	59	82	...........................................................GGCGTCCGTGCGCCGATGCGAGT...........................	23	GGCGTCCGTGCGCCGATGCGAGT	57	44.8655	0.457811	0	0	0.2467	0	0.0469	0.1835	0	0.1406	0.0491	0	0	0	0	0	0	0	0	15.1009	13.0389	11.373	3.9189	0	0	0	0	0	0	0	0.3615	0	0	0	0	0	0	0	0	0	0	0	0
mmu-mir-712_6_32_+	6	32	......CTTCTCCTTCACCCGGGCGGTACCCG.............................................................................	26	CTTCTCCTTCACCCGGGCGGTACCCG	54	2.9537	0.0301398	0	0	0	0.1077	0	0	0.5623	1.9222	0	0	0	0	0	0	0	0	0	0	0	0	0	0	0	0	0	0	0	0	0.3615	0	0	0	0	0	0	0	0	0	0	0	0
mmu-mir-712_50_77_+	50	77	..................................................GGACGCCGCGGCGTCCGTGCGCCGATG................................	27	GGACGCCGCGGCGTCCGTGCGCCGATG	54	2.8275	0.028852	0	0	0	0.1616	0	0.0612	1.462	0.7501	0.3926	0	0	0	0	0	0	0	0	0	0	0	0	0	0	0	0	0	0	0	0	0	0	0	0	0	0	0	0	0	0	0	0
mmu-mir-712_15_33_+	15	33	...............CACCCGGGCGGTACCCGC............................................................................	18	CACCCGGGCGGTACCCGC	52	9.1455	0.0933214	0	0	0	0	0	0.1223	0.1687	0.1875	0.0982	0	0	0	0	0	0	0	0	0	0	0	0	0	0	0	0	0	0	0	0	0	0	0	0	0	0	0	0	0	0	0	0
mmu-mir-712_28_46_+	28	46	............................CCCGCTCCGGCGCCGGCC...............................................................	18	CCCGCTCCGGCGCCGGCC	52	3.2713	0.0333806	0.7885	0.4446	0	0.6464	0.1876	0.1835	0	0.2813	0.1472	0	0	0	0	0	0	0	0	0	0	0	0	0	0	0	0	0	0	0	0	0	0	0	0	0	0	0	0	0	0	0	0
mmu-mir-712_13_31_+	13	31	.............TTCACCCGGGCGGTACCC..............................................................................	18	TTCACCCGGGCGGTACCC	51	2.8555	0.0291378	0.7278	1.0868	0.8018	0	0	0	0	0	0.1472	0	0	0	0	0	0	0	0	0	0	0	0	0	0	0	0	0	0	0	0	0	0	0	0	0	0	0	0	0	0	0	0
mmu-mir-712_35_57_+	35	57	...................................CGGCGCCGGCCCGCGGGACGCC....................................................	22	CGGCGCCGGCCCGCGGGACGCC	49	3.0894	0.0315245	1.1524	0.988	0.185	0	0.0469	0	0	0.0469	0.1472	0	0	0	0	0	0	0	0	0	0	0	0	0	0	0	0	0	0	0	0	0	0	0	0	0	0	0	0	0	0	0	0
mmu-mir-712_12_34_+	12	34	............CTTCACCCGGGCGGTACCCGCT...........................................................................	22	CTTCACCCGGGCGGTACCCGCT	48	3.1709	0.0323561	0.7278	0.1482	0.3084	0.377	0.2815	0.1835	0.0562	0.0938	0.1472	0	0	0	0	0	0	0	0	0	0	0	0	0	0	0	0	0	0	0	0	0	0	0	0	0	0	0	0	0	0	0	0
mmu-mir-712_18_36_+	18	36	..................CCGGGCGGTACCCGCTCC.........................................................................	18	CCGGGCGGTACCCGCTCC	48	3.7767	0.0385378	0.9098	0.2964	0.37	0	0.1876	0.1835	0	0.1406	0.2945	0	0	0	0	0	0	0	0	0	0.7244	0	0	0	0	0	0	0	0	0	0	0	0	0	0	0	0	0	0	0	0	0	0
mmu-mir-712_27_48_+	27	48	...........................ACCCGCTCCGGCGCCGGCCCG.............................................................	21	ACCCGCTCCGGCGCCGGCCCG	48	9.6191	0.0981541	0	0.247	0.185	0	0	0	0.8997	0	0.0491	0	0	0	0	0	0	0	0	0	0	0	0	0	0	0	0	0	0	0	0	0	0	0	0	0	0	0	0	0	0	0.469	0
mmu-mir-712_35_53_+	35	53	...................................CGGCGCCGGCCCGCGGGA........................................................	18	CGGCGCCGGCCCGCGGGA	47	3.7784	0.0385551	0.3639	0.3952	0.4934	0	0.0938	0.0612	0.2249	0.1875	0.3435	0	0	0	0	0	0	0	0	0	0	0	0	0	0	0	0	0	0	0	0.3615	0	0	0	0	0	0	0	0	0	0	0	0
mmu-mir-712_19_37_+	19	37	...................CGGGCGGTACCCGCTCCG........................................................................	18	CGGGCGGTACCCGCTCCG	46	5.0421	0.05145	0	0.1976	0.2467	0.0539	0.0469	0	0	0.3751	0.2454	0	0	0	0	0	0	0	0	0	0	0	0	0	0	0	0	0	0	0	0	0	0	0	0.6363	0.1894	0.2451	0	0	0	0	0	0
mmu-mir-712_29_58_+	29	58	.............................CCGCTCCGGCGCCGGCCCGCGGGACGCCG...................................................	29	CCGCTCCGGCGCCGGCCCGCGGGACGCCG	46	2.4778	0.0252837	0.8491	0.7904	0.2467	0.0539	0	0	0	0.0469	0.4908	0	0	0	0	0	0	0	0	0	0	0	0	0	0	0	0	0	0	0	0	0	0	0	0	0	0	0	0	0	0	0	0
mmu-mir-712_41_60_+	41	60	.........................................CGGCCCGCGGGACGCCGCG.................................................	19	CGGCCCGCGGGACGCCGCG	46	3.1061	0.0316949	0.0607	0.2964	0.3084	0	0	0	0.3936	0.1875	0.9324	0	0	0	0	0	0	0	0	0	0	0	0	0	0	0	0	0	0	0	0	0	0	0	0	0	0	0	0	0	0	0	0
mmu-mir-712_33_53_+	33	53	.................................TCCGGCGCCGGCCCGCGGGA........................................................	20	TCCGGCGCCGGCCCGCGGGA	42	12.4087	0.126619	0	0	0	0	0	0	0	0.0938	0.0982	0	0	0	0	0	0	0	0	0	0	0	0	0	0	0	0	0	0	0	0.723	0	0	0	0	0	0	0	0	0	0	0.469	0.3895
mmu-mir-712_8_29_+	8	29	........TCTCCTTCACCCGGGCGGTAC................................................................................	21	TCTCCTTCACCCGGGCGGTAC	41	2.3838	0.0243245	0.4246	0	0.37	0.1616	0.1407	0.3058	0.5623	0.0938	0.1472	0	0	0	0	0	0	0	0	0	0	0	0	0	0	0	0	0	0	0	0	0	0	0	0	0	0	0	0	0	0	0	0
mmu-mir-712_34_54_+	34	54	..................................CCGGCGCCGGCCCGCGGGAC.......................................................	20	CCGGCGCCGGCCCGCGGGAC	41	9.3699	0.0956112	0.2426	0	0.2467	0	0	0	0	0	0.0491	0	0	0	0	0	0	0	0	0	0	0	0	0	0	0	0	0	0	0	0	0	0	0	0	0	0	0	0	0	0	0	0
mmu-mir-712_38_60_+	38	60	......................................CGCCGGCCCGCGGGACGCCGCG.................................................	22	CGCCGGCCCGCGGGACGCCGCG	41	9.6918	0.0988959	0	0.1976	0.5551	0	0	0	0	0.0469	0	0	0	0	0	0	0	0.7371	0	0	0	0.669	0	0	0	0	0	0	0	0	0	0	0	0	0	0	0	0	0	0	0	0	0
mmu-mir-712_6_27_+	6	27	......CTTCTCCTTCACCCGGGCGGT..................................................................................	21	CTTCTCCTTCACCCGGGCGGT	40	2.2579	0.0230398	0	0	0.37	0.1616	0	0	0.731	0.797	0	0	0	0	0	0	0	0	0	0	0	0	0	0	0	0	0	0	0	0	0	0	0	0	0	0	0	0	0	0	0	0	0
mmu-mir-712_12_33_+	12	33	............CTTCACCCGGGCGGTACCCGC............................................................................	21	CTTCACCCGGGCGGTACCCGC	39	3.7646	0.0384143	0.4852	0.247	0	0	0	0.1835	0.4499	0.1406	0.0491	0	0	0	0	0	0	0	0	0	0	0	0	0	0	0	0	0	0	0	0	0	0	0	0	0	0	0	0	0	0	0	0
mmu-mir-712_33_54_+	33	54	.................................TCCGGCGCCGGCCCGCGGGAC.......................................................	21	TCCGGCGCCGGCCCGCGGGAC	39	9.9258	0.101284	0.1213	0	0.0617	0	0	0	0	0.0469	0	0	0	0	0	0	0	0	0	0	0	0	0	0	0	0	0	0	0	0	0	0	0	0	0	0	0	0	0	0	0	0.469	0.7791
mmu-mir-712_74_94_+	74	94	..........................................................................ATGCGAGTCACCCCCGGGTG...............	20	ATGCGAGTCACCCCCGGGTG	39	4.9079	0.0500806	0	0	0	0	0	0	0	0.0469	0	0	0	0	0	0	0	0	0	0	0	0	0	0	0	0	0	0	0	0	0	0	0	0	0	0	0	0	0	0	0	0	0
mmu-mir-712_8_35_+	8	35	........TCTCCTTCACCCGGGCGGTACCCGCTC..........................................................................	27	TCTCCTTCACCCGGGCGGTACCCGCTC	38	2.1337	0.0217724	1.0311	0.741	0	0.1616	0	0	0	0.0469	0.0491	0	0	0	0	0	0	0	0	0	0	0	0	0	0	0	0	0	0	0	0	0	0	0	0	0	0	0	0	0	0	0	0
mmu-mir-712_9_29_+	9	29	.........CTCCTTCACCCGGGCGGTAC................................................................................	20	CTCCTTCACCCGGGCGGTAC	38	2.8139	0.0287133	0.7278	0.3458	0	0.3232	0.1407	0	0	0.1406	0.0982	0	0	0	0	0	0	0	0	0	0	0	0	0	0	0	0	0	0	0	0.723	0	0	0	0	0	0	0	0	0	0	0	0
mmu-mir-712_26_47_+	26	47	..........................TACCCGCTCCGGCGCCGGCCC..............................................................	21	TACCCGCTCCGGCGCCGGCCC	38	10.8846	0.111067	0	0.0494	0	0	0	0.0612	0	0	0	0	0	0	0	0	0	0	0	0	0	0	0	0	0	0	0	0	0	0	0	0	0	0	0	0	0	0	0.7953	0	0	3.2829	1.5582
mmu-mir-712_27_46_+	27	46	...........................ACCCGCTCCGGCGCCGGCC...............................................................	19	ACCCGCTCCGGCGCCGGCC	38	10.7084	0.109269	0	0	0.37	0.1077	0	0	0.0562	0	0	0	0	0	0	0	0	0	0	0	0	0	0	0	0	0	0	0	0	0	0	0	0	0	0	0	0	0	0	0	0	0	0
mmu-mir-712_52_75_+	52	75	....................................................ACGCCGCGGCGTCCGTGCGCCGA..................................	23	ACGCCGCGGCGTCCGTGCGCCGA	38	4.7649	0.0486214	0	0	0	0	0	0	0	0	0	0	0	0	0	0	0	0	0	0	0	0	0	0	0	0	0	0	0	0	0.3615	0	0	0	0	0	0	0	0	0	0	0	0
mmu-mir-712_59_81_+	59	81	...........................................................GGCGTCCGTGCGCCGATGCGAG............................	22	GGCGTCCGTGCGCCGATGCGAG	38	15.4907	0.158068	0	0	0	0	0	0	0	0.0469	0	0	0	0	0	0	0	0	0	0	2.8975	4.683	3.9189	0	0	0	0	0	0	0	0	0	0	0	0	0.3789	0.2451	0	0	0	0	0	0
mmu-mir-712_76_98_+	76	98	............................................................................GCGAGTCACCCCCGGGTGTTGC...........	22	GCGAGTCACCCCCGGGTGTTGC	38	4.0591	0.0414194	0	0	0	0	0	0	0	0	0	0	0	0	0	0	0	0	0	0	0	0	0	0	0	0	0	0	0	0	0.3615	0	0	0	0	0	0	0	0	0	0	0	0
mmu-mir-712_9_32_+	9	32	.........CTCCTTCACCCGGGCGGTACCCG.............................................................................	23	CTCCTTCACCCGGGCGGTACCCG	37	3.862	0.0394082	0.1213	0.3458	0	0.2693	0.2815	0.0612	0	0.1875	0.1963	0	0	0	0	0	0	0	0	0	0	0	0	0	0	0	0	0	0	0	0.3615	0	0	0	0	0	0	0	0	0	0	0	0
mmu-mir-712_20_45_+	20	45	....................GGGCGGTACCCGCTCCGGCGCCGGC................................................................	25	GGGCGGTACCCGCTCCGGCGCCGGC	37	1.9572	0.0199714	0.5459	0.3952	0.3084	0	0	0	0	0.6095	0.0982	0	0	0	0	0	0	0	0	0	0	0	0	0	0	0	0	0	0	0	0	0	0	0	0	0	0	0	0	0	0	0	0
mmu-mir-712_14_37_+	14	37	..............TCACCCGGGCGGTACCCGCTCCG........................................................................	23	TCACCCGGGCGGTACCCGCTCCG	36	5.9091	0.0602969	0	0	0	0	0	0	0	0	0	0	0	0	0	0	0	0	0	0	0	0	0	0	0	0	0	0	0	0	0	0	0	0	0	0	0	0	0	0	0	0	0
mmu-mir-712_53_75_+	53	75	.....................................................CGCCGCGGCGTCCGTGCGCCGA..................................	22	CGCCGCGGCGTCCGTGCGCCGA	35	6.5514	0.066851	0	0.0988	0.1233	0	0	0.2447	0	0	0	0	0	0	0	0	0	0	0	0	0.7244	0.669	0	0	0	0	0	0	0	0	0	0	0	0	0	0	0	0	0	0	0	0	0
mmu-mir-712_11_29_+	11	29	...........CCTTCACCCGGGCGGTAC................................................................................	18	CCTTCACCCGGGCGGTAC	34	1.8257	0.0186296	0	0.1976	0	0	0.1407	0	1.2933	0.0469	0.1472	0	0	0	0	0	0	0	0	0	0	0	0	0	0	0	0	0	0	0	0	0	0	0	0	0	0	0	0	0	0	0	0
mmu-mir-712_47_67_+	47	67	...............................................GCGGGACGCCGCGGCGTCCG..........................................	20	GCGGGACGCCGCGGCGTCCG	34	1.8978	0.0193653	0.3639	0.3952	0.8018	0	0	0	0	0.1406	0.1963	0	0	0	0	0	0	0	0	0	0	0	0	0	0	0	0	0	0	0	0	0	0	0	0	0	0	0	0	0	0	0	0
mmu-mir-712_7_29_+	7	29	.......TTCTCCTTCACCCGGGCGGTAC................................................................................	22	TTCTCCTTCACCCGGGCGGTAC	32	2.4121	0.0246133	0.182	0.2964	0.37	0	0	0	0.6186	0.0469	0.0982	0	0	0	0	0	0	0	0	0	0	0	0	0	0	0	0	0	0	0	0.723	0	0	0	0	0	0	0	0	0	0	0	0
mmu-mir-712_16_36_+	16	36	................ACCCGGGCGGTACCCGCTCC.........................................................................	20	ACCCGGGCGGTACCCGCTCC	32	7.3263	0.0747582	0	0	0	0	0	0	0	0.2813	0.0491	0	0	0	0	0	0	0	0	0	0	0	0	0	0	0	0	0	0	0	0	0	0	0	0	0	0	0	0	0	0	0	0
mmu-mir-712_6_28_+	6	28	......CTTCTCCTTCACCCGGGCGGTA.................................................................................	22	CTTCTCCTTCACCCGGGCGGTA	30	2.8667	0.029252	0	0	0	0	0	0	0.3374	0.7032	0.1472	0	0	0	0	0	0	0	0	0	0	0.669	0	0	0	0	0	0	0	0	0	0	0	0	0	0	0	0	0	0	0	0	0
mmu-mir-712_10_33_+	10	33	..........TCCTTCACCCGGGCGGTACCCGC............................................................................	23	TCCTTCACCCGGGCGGTACCCGC	30	5.3902	0.055002	0.3033	0	0	0	0	0	0	0	0	0	0	0	0	0	0	0	0	0	0	0	0	0	0	0	0	0	0	0	0	0	0	0	0	0	0	0	0	0	0	0	0
mmu-mir-712_29_53_+	29	53	.............................CCGCTCCGGCGCCGGCCCGCGGGA........................................................	24	CCGCTCCGGCGCCGGCCCGCGGGA	30	3.1153	0.0317888	0	0.1482	0	0	0.0469	0	0.2812	0	0.0982	0	0	0	0	0	0	0	0	0	0	0	0	0	0	0	0	0	0	0	0	0	0	0	0	0	0	0	0	0	0	0	0
mmu-mir-712_47_65_+	47	65	...............................................GCGGGACGCCGCGGCGTC............................................	18	GCGGGACGCCGCGGCGTC	30	1.674	0.0170816	0	0.2964	0.9868	0.0539	0	0	0	0.1406	0.1963	0	0	0	0	0	0	0	0	0	0	0	0	0	0	0	0	0	0	0	0	0	0	0	0	0	0	0	0	0	0	0	0
mmu-mir-712_35_60_+	35	60	...................................CGGCGCCGGCCCGCGGGACGCCGCG.................................................	25	CGGCGCCGGCCCGCGGGACGCCGCG	29	5.8978	0.0601816	0.182	0	0.1233	0	0	0	0	0.1875	0.1963	0	0	0	0	0	0	0	0	0	0	0	0	0	0	0	0	0	0	0	0	0	0	0	0	0	0	0	0	0	0	0	0
mmu-mir-712_17_36_+	17	36	.................CCCGGGCGGTACCCGCTCC.........................................................................	19	CCCGGGCGGTACCCGCTCC	28	2.9626	0.0302306	0.4246	0.0988	0.0617	0.1077	0.0469	0.1223	0	0.2813	0.0491	0	0	0	0	0	0	0	0	0	0	0	0	0	0	0	0	0	0	0	0	0	0	0	0	0	0	0	0	0	0	0	0
mmu-mir-712_34_53_+	34	53	..................................CCGGCGCCGGCCCGCGGGA........................................................	19	CCGGCGCCGGCCCGCGGGA	28	7.1375	0.0728316	0	0	0	0	0	0	0	0	0.2945	0	0	0	0	0	0	0	0	0	0	0	0	0	0	0	0	0	0	0	0	0	0	0	0	0	0	0	0	0	0	0	0.7791
mmu-mir-712_9_35_+	9	35	.........CTCCTTCACCCGGGCGGTACCCGCTC..........................................................................	26	CTCCTTCACCCGGGCGGTACCCGCTC	27	3.0002	0.0306143	0	0.247	0.185	0.2155	0.0469	0	0	0.2813	0.0982	0	0	0	0	0	0	0	0	0	0	0	0	0	0	0	0	0	0	0	1.0845	0	0	0	0	0	0	0	0	0	0	0	0
mmu-mir-712_19_46_+	19	46	...................CGGGCGGTACCCGCTCCGGCGCCGGCC...............................................................	27	CGGGCGGTACCCGCTCCGGCGCCGGCC	27	1.5314	0.0156265	0.182	0.3458	0.6167	0.0539	0.0469	0.0612	0.2249	0	0	0	0	0	0	0	0	0	0	0	0	0	0	0	0	0	0	0	0	0	0	0	0	0	0	0	0	0	0	0	0	0	0
mmu-mir-712_61_82_+	61	82	.............................................................CGTCCGTGCGCCGATGCGAGT...........................	21	CGTCCGTGCGCCGATGCGAGT	27	7.9476	0.081098	0.2426	0	0.0617	0.0539	0	0.0612	0.2249	0	0.2454	0	0	0	0	0	0	0	0	0	0	1.338	3.9189	0	0	0	0	0	0	0	0.3615	0	0	0	0	0	0	0	0	0	0	0	0.3895
mmu-mir-712_6_26_+	6	26	......CTTCTCCTTCACCCGGGCGG...................................................................................	20	CTTCTCCTTCACCCGGGCGG	26	2.3654	0.0241367	0	0	0	0.1616	0	0	0.1687	0.7032	0.0491	0	0	0	0	0	0	0	0	0	0	0	0	0	0	0	0	0	0	0	1.0845	0	0	0	0	0	0	0	0	0	0	0	0
mmu-mir-712_26_50_+	26	50	..........................TACCCGCTCCGGCGCCGGCCCGCG...........................................................	24	TACCCGCTCCGGCGCCGGCCCGCG	26	3.5035	0.03575	0	0	0	0	0	0	0.9559	0	0	0	0	0	0	0	0	0	0	0	0	0	0	0	0	0	0	0	0	0	0	0	0	0	0	0	0.2451	0	0	0	0	0.469	0
mmu-mir-712_37_58_+	37	58	.....................................GCGCCGGCCCGCGGGACGCCG...................................................	21	GCGCCGGCCCGCGGGACGCCG	26	4.9911	0.0509296	0	0	0	0	0	0	0	0	0	0	0	0	0	0	0	0	0	0	0	0	0	0	0	0	0	0	0	0	0	0	0	0	0	0	0	0	0	0	0	0	0
mmu-mir-712_6_29_+	6	29	......CTTCTCCTTCACCCGGGCGGTAC................................................................................	23	CTTCTCCTTCACCCGGGCGGTAC	25	1.5136	0.0154449	0	0.3458	0	0	0	0	0.0562	0.7501	0	0	0	0	0	0	0	0	0	0	0	0	0	0	0	0	0	0	0	0	0.3615	0	0	0	0	0	0	0	0	0	0	0	0
mmu-mir-712_13_33_+	13	33	.............TTCACCCGGGCGGTACCCGC............................................................................	20	TTCACCCGGGCGGTACCCGC	25	2.5393	0.0259112	0.0607	0.247	0	0	0.0938	0	0.2812	0	0.0982	0	0	0	0	0	0	0	0	0	0	0	0	0	0	0	0	0	0	0	0	0	0	0	0	0.1894	0	0	0	0	0	0	0
mmu-mir-712_15_37_+	15	37	...............CACCCGGGCGGTACCCGCTCCG........................................................................	22	CACCCGGGCGGTACCCGCTCCG	25	4.5573	0.0465031	0.2426	0	0	0	0	0	0	0.0469	0	0	0	0	0	0	0	0	0	0	0	0	0	0	0	0	0	0	0	0	0.723	0	0	0	0	0	0	0	0	0	0	0	0
mmu-mir-712_40_61_+	40	61	........................................CCGGCCCGCGGGACGCCGCGG................................................	21	CCGGCCCGCGGGACGCCGCGG	25	1.5442	0.0157571	0.5459	0.1976	0.1233	0	0	0	0.4499	0	0	0	0	0	0	0	0	0	0	0	0	0	0	0	0	0	0	0	0	0	0	0	0	0	0	0	0	0	0	0	0	0	0
mmu-mir-712_81_105_+	81	105	.................................................................................TCACCCCCGGGTGTTGCGAGTTCG....	24	TCACCCCCGGGTGTTGCGAGTTCG	24	3.6697	0.0374459	0	0	0	0	0	0	0	0	0	0	0	0	0	0	0	0	0	0	0	0	0	0	0	0	0	0	0	0	0	0	0	0	0	0	0	0	0	0	0	0	0
mmu-mir-712_8_32_+	8	32	........TCTCCTTCACCCGGGCGGTACCCG.............................................................................	24	TCTCCTTCACCCGGGCGGTACCCG	23	2.3155	0.0236276	0.3639	0	0.2467	0.1077	0	0	0	0.2813	0	0	0	0	0	0	0	0	0	0	0	0	0	0	0	0	0	0	0	0	0.3615	0	0	0	0	0	0	0	0	0	0	0	0
mmu-mir-712_33_55_+	33	55	.................................TCCGGCGCCGGCCCGCGGGACG......................................................	22	TCCGGCGCCGGCCCGCGGGACG	23	4.023	0.041051	0	0.2964	0	0	0	0	0	0.1406	0	0	0	0	0	0	0	0	0	0	0	0	0	0	0	0	0	0	0	0	0	0	0	0	0	0.1894	0	0	0	0	0	0	0
mmu-mir-712_76_99_+	76	99	............................................................................GCGAGTCACCCCCGGGTGTTGCG..........	23	GCGAGTCACCCCCGGGTGTTGCG	23	4.1921	0.0427765	0	0	0	0	0	0	0	0	0	0	0	0	0	0	0	0	0	0	0	0	0	0	0	0	0	0	0	0	0.723	0	0	0	0	0.1894	0	0.2039	0	0	0	0	0
mmu-mir-712_82_101_+	82	101	..................................................................................CACCCCCGGGTGTTGCGAG........	19	CACCCCCGGGTGTTGCGAG	23	4.3801	0.0446949	0	0	0	0	0	0.0612	0	0.0469	0.1963	0	0	0	0	0	0	0	0	0	0	0	0	0	0	0	0	0	0	0	0.723	0	0	0	0	0	0	0	0	0	0	0	0
mmu-mir-712_27_49_+	27	49	...........................ACCCGCTCCGGCGCCGGCCCGC............................................................	22	ACCCGCTCCGGCGCCGGCCCGC	22	5.6088	0.0572327	0	0	0	0	0	0	0	0	0	0	0	0	0	0	0	0	0	0	0	0	0	0	0	0	0	0	0	0	0	0	0	0	0	0	0	0	0	0	0	0	0
mmu-mir-712_8_31_+	8	31	........TCTCCTTCACCCGGGCGGTACCC..............................................................................	23	TCTCCTTCACCCGGGCGGTACCC	21	2.9873	0.0304827	0	0.247	0	0	0.0469	0	0.5061	0	0	0	0	0	0	0	0	0	0	0	0.7244	0	0	0	0	0	0	0	0	0	0.3615	0	0	0	0	0	0	0	0	0	0	0	0
mmu-mir-712_8_30_+	8	30	........TCTCCTTCACCCGGGCGGTACC...............................................................................	22	TCTCCTTCACCCGGGCGGTACC	20	1.9259	0.019652	0	0.1976	0.37	0.3232	0	0	0	0	0	0	0	0	0	0	0	0	0	0	0	0	0	0	0	0	0	0	0	0	0.723	0	0	0	0	0	0	0	0	0	0	0	0
mmu-mir-712_10_28_+	10	28	..........TCCTTCACCCGGGCGGTA.................................................................................	18	TCCTTCACCCGGGCGGTA	20	1.5054	0.0153612	0.182	0	0.3084	0.1077	0	0	0	0.3282	0.0491	0	0	0	0	0	0	0	0	0	0	0	0	0	0	0	0	0	0	0	0.3615	0	0	0	0	0	0	0	0	0	0	0	0
mmu-mir-712_18_37_+	18	37	..................CCGGGCGGTACCCGCTCCG........................................................................	19	CCGGGCGGTACCCGCTCCG	20	1.4961	0.0152663	0.182	0	0.4934	0	0.0938	0.0612	0	0.0938	0.1472	0	0	0	0	0	0	0	0	0	0	0	0	0	0	0	0	0	0	0	0	0	0	0	0	0	0	0	0	0	0	0	0
mmu-mir-712_34_60_+	34	60	..................................CCGGCGCCGGCCCGCGGGACGCCGCG.................................................	26	CCGGCGCCGGCCCGCGGGACGCCGCG	20	6.2487	0.0637622	0	0	0	0	0	0	0	0.0938	0	0	0	0	0	0	0	0	0	0	0	0	0	0	0	0	0	0	0	0	0	0	0	0	0	0	0	0	0	0	0	0	0
mmu-mir-712_35_62_+	35	62	...................................CGGCGCCGGCCCGCGGGACGCCGCGGC...............................................	27	CGGCGCCGGCCCGCGGGACGCCGCGGC	20	1.3192	0.0134612	0.4852	0.1482	0.3084	0	0	0	0	0.1406	0	0	0	0	0	0	0	0	0	0	0	0	0	0	0	0	0	0	0	0	0	0	0.2368	0	0	0	0	0	0	0	0	0	0
mmu-mir-712_74_95_+	74	95	..........................................................................ATGCGAGTCACCCCCGGGTGT..............	21	ATGCGAGTCACCCCCGGGTGT	20	2.2125	0.0225765	0	0	0	0	0	0	0	0	0	0	0	0	0	0	0	0	0	0	0	0	0	0	0	0	0	0	0	0	0	0	0	0	0	0	0	0	0	0	0	0	0
mmu-mir-712_10_30_+	10	30	..........TCCTTCACCCGGGCGGTACC...............................................................................	20	TCCTTCACCCGGGCGGTACC	19	1.3571	0.013848	0	0	0	0.377	0	0	0.6186	0	0	0	0	0	0	0	0	0	0	0	0	0	0	0	0	0	0	0	0	0	0.3615	0	0	0	0	0	0	0	0	0	0	0	0
mmu-mir-712_31_53_+	31	53	...............................GCTCCGGCGCCGGCCCGCGGGA........................................................	22	GCTCCGGCGCCGGCCCGCGGGA	19	1.6704	0.0170449	0	0	0.1233	0	0	0	0.5061	0.0938	0	0	0	0	0	0	0	0	0	0	0	0	0	0	0	0	0	0	0	0	0	0	0	0	0	0	0	0	0	0	0	0	0
mmu-mir-712_34_57_+	34	57	..................................CCGGCGCCGGCCCGCGGGACGCC....................................................	23	CCGGCGCCGGCCCGCGGGACGCC	19	2.0633	0.0210541	0.0607	0.1482	0.185	0	0	0	0	0.1875	0.0491	0	0	0	0	0	0	0	0	0	0	0	0	0	0	0	0	0	0	0	0	0	0	0	0	0	0	0	0	0	0	0	0
mmu-mir-712_37_60_+	37	60	.....................................GCGCCGGCCCGCGGGACGCCGCG.................................................	23	GCGCCGGCCCGCGGGACGCCGCG	19	6.0768	0.0620082	0	0	0	0	0	0	0	0	0	0	0	0	0	0	0	0	0	0	0	0	0	0	0	0	0	0	0	0	0	0	0	0	0	0	0	0	0	0	0	0	0
mmu-mir-712_41_61_+	41	61	.........................................CGGCCCGCGGGACGCCGCGG................................................	20	CGGCCCGCGGGACGCCGCGG	19	1.0868	0.0110898	0.3033	0	0.4934	0	0	0	0	0.0938	0.1963	0	0	0	0	0	0	0	0	0	0	0	0	0	0	0	0	0	0	0	0	0	0	0	0	0	0	0	0	0	0	0	0
mmu-mir-712_8_28_+	8	28	........TCTCCTTCACCCGGGCGGTA.................................................................................	20	TCTCCTTCACCCGGGCGGTA	18	2.0941	0.0213684	0	0.0988	0.185	0	0	0.1223	0	0.0469	0	0	0	0	0	0	0	0	0	0	0	0	0	0	0	0	0	0	0	0	0	0	0	0	0	0	0	0	0	0	0	0	0
mmu-mir-712_9_27_+	9	27	.........CTCCTTCACCCGGGCGGT..................................................................................	18	CTCCTTCACCCGGGCGGT	18	1.773	0.0180918	0.0607	0.3458	0.1233	0	0	0	0.1687	0	0	0	0	0	0	0	0	0	0	0	0	0	0	0	0	0	0	0	0	0	0.3615	0	0	0	0	0	0	0	0	0	0	0	0
mmu-mir-712_10_29_+	10	29	..........TCCTTCACCCGGGCGGTAC................................................................................	19	TCCTTCACCCGGGCGGTAC	18	1.171	0.011949	0	0.0494	0	0	0	0.2447	0.6186	0	0	0	0	0	0	0	0	0	0	0	0	0	0	0	0	0	0	0	0	0	0	0	0	0	0	0	0	0	0	0	0	0	0
mmu-mir-712_15_34_+	15	34	...............CACCCGGGCGGTACCCGCT...........................................................................	19	CACCCGGGCGGTACCCGCT	18	1.9261	0.0196541	0.0607	0	0	0.2155	0.0938	0	0	0	0.2454	0	0	0	0	0	0	0	0	0	0	0	0	0	0	0	0	0	0	0	0	0	0	0	0	0	0	0	0	0	0	0	0
mmu-mir-712_26_46_+	26	46	..........................TACCCGCTCCGGCGCCGGCC...............................................................	20	TACCCGCTCCGGCGCCGGCC	18	4.2919	0.0437949	0	0	0	0	0	0.1835	0	0	0	0	0	0	0	0	0	0	0	0	0	0	0	0	0	0	0	0	0	0	0	0	0	0	0	0	0	0	0	0	0	1.407	0.3895
mmu-mir-712_28_48_+	28	48	............................CCCGCTCCGGCGCCGGCCCG.............................................................	20	CCCGCTCCGGCGCCGGCCCG	18	4.899	0.0499898	0	0	0	0	0	0	0.3374	0.0938	0.1963	0	0	0	0	0	0	0	2.8174	0	0	0	0	0	0	0	0	0	0	0	0	0	0	0	0	0	0	0	0	0	0	0	0
mmu-mir-712_30_54_+	30	54	..............................CGCTCCGGCGCCGGCCCGCGGGAC.......................................................	24	CGCTCCGGCGCCGGCCCGCGGGAC	18	1.752	0.0178776	0.0607	0.1976	0	0	0	0	0.4499	0.0469	0	0	0	0	0	0	0	0	0	0	0	0	0	0	0	0	0	0	0	0	0	0	0	0	0	0	0	0	0	0	0	0	0
mmu-mir-712_38_58_+	38	58	......................................CGCCGGCCCGCGGGACGCCG...................................................	20	CGCCGGCCCGCGGGACGCCG	18	4.9348	0.0503551	0	0	0	0	0	0	0	0.0938	0	0	0	0	0	0	0	0	0	0	0	0	0	0	0	0	0	0	0	0	0.3615	0	0	0	0	0	0	0	0	0	0	0	0
mmu-mir-712_39_60_+	39	60	.......................................GCCGGCCCGCGGGACGCCGCG.................................................	21	GCCGGCCCGCGGGACGCCGCG	18	3.986	0.0406735	0	0.1482	0	0	0	0	0	0	0.2454	0	0	0	0	0	0	0	0	0	0	0.669	0	0	0	0	0	0	0	0	0	0	0	0	0	0	0	0	0	0	0	0	0
mmu-mir-712_53_71_+	53	71	.....................................................CGCCGCGGCGTCCGTGCG......................................	18	CGCCGCGGCGTCCGTGCG	18	1.1808	0.012049	0	0	0.37	0.1077	0	0	0.2812	0.1406	0	0	0	0	0	0	0	0	0	0	0	0	0	0	0	0	0	0	0	0	0	0	0	0	0	0	0	0	0	0	0	0	0
mmu-mir-712_75_93_+	75	93	...........................................................................TGCGAGTCACCCCCGGGT................	18	TGCGAGTCACCCCCGGGT	18	7.4177	0.0756908	0	0	0	0.0539	0	0	0	0	0	0	0	0	0	0	0	0	0	0	0	0	0	0	0	0	0	0	0	0	0	0	0	5.5366	0	0	0.2451	0	0	0	0	0	0
mmu-mir-712_86_104_+	86	104	......................................................................................CCCGGGTGTTGCGAGTTC.....	18	CCCGGGTGTTGCGAGTTC	18	1.0394	0.0106061	0	0	0.3084	0	0	0	0.731	0	0	0	0	0	0	0	0	0	0	0	0	0	0	0	0	0	0	0	0	0	0	0	0	0	0	0	0	0	0	0	0	0	0
mmu-mir-712_7_26_+	7	26	.......TTCTCCTTCACCCGGGCGG...................................................................................	19	TTCTCCTTCACCCGGGCGG	17	3.2514	0.0331776	0	0	0	0	0	0.2447	0	0.0469	0.0491	0	0	0	0	0	0	0	0	0	0	0	0	0	0	0	0	0	0	0	2.5305	0	0	0	0	0	0	0	0	0	0	0	0
mmu-mir-712_13_32_+	13	32	.............TTCACCCGGGCGGTACCCG.............................................................................	19	TTCACCCGGGCGGTACCCG	17	0.8354	0.00852449	0.0607	0.3952	0	0	0.0469	0	0	0.2344	0.0982	0	0	0	0	0	0	0	0	0	0	0	0	0	0	0	0	0	0	0	0	0	0	0	0	0	0	0	0	0	0	0	0
mmu-mir-712_13_34_+	13	34	.............TTCACCCGGGCGGTACCCGCT...........................................................................	21	TTCACCCGGGCGGTACCCGCT	17	2.4656	0.0251592	0	0	0	0	0.1407	0	0.2812	0.0469	0	0	0	0	0	0	0	0	0	0	0	0	0	0	0	0	0	0	0	0	0	0	0	0	0	0	0	0	0	0	0	0	0.7791
mmu-mir-712_14_32_+	14	32	..............TCACCCGGGCGGTACCCG.............................................................................	18	TCACCCGGGCGGTACCCG	17	2.2704	0.0231673	0	0.1976	0	0	0	0	0	0.2813	0	0	0	0	0	0	0	0	0	0	0	0	0	0	0	0	0	0	0	0	0	0	0	0	0	0	0	0	0	0	0	0	0
mmu-mir-712_18_46_+	18	46	..................CCGGGCGGTACCCGCTCCGGCGCCGGCC...............................................................	28	CCGGGCGGTACCCGCTCCGGCGCCGGCC	17	0.8988	0.00917143	0	0.3952	0.185	0	0	0.1223	0	0	0.1963	0	0	0	0	0	0	0	0	0	0	0	0	0	0	0	0	0	0	0	0	0	0	0	0	0	0	0	0	0	0	0	0
mmu-mir-712_35_64_+	35	64	...................................CGGCGCCGGCCCGCGGGACGCCGCGGCGT.............................................	29	CGGCGCCGGCCCGCGGGACGCCGCGGCGT	17	0.9672	0.00986939	0.3033	0.247	0.37	0	0	0	0	0.0469	0	0	0	0	0	0	0	0	0	0	0	0	0	0	0	0	0	0	0	0	0	0	0	0	0	0	0	0	0	0	0	0	0
mmu-mir-712_36_63_+	36	63	....................................GGCGCCGGCCCGCGGGACGCCGCGGCG..............................................	27	GGCGCCGGCCCGCGGGACGCCGCGGCG	17	2.5756	0.0262816	0	0	0	0	0	0	0	0	0.0982	0	0	0	0	0	0	0	0	0	0	0	0	0	0	0	0	0	0	0	0	0	0	0	0	0	0	0	0	0	0	0	0
mmu-mir-712_8_27_+	8	27	........TCTCCTTCACCCGGGCGGT..................................................................................	19	TCTCCTTCACCCGGGCGGT	16	2.4949	0.0254582	0.3033	0	0	0	0	0	0	0	0.1963	0	0	0	0	0	0	0	0	0	0	0	0	0	0	0	0	0	0	0	0.3615	0	0	0	0	0	0	0	0	0	0	0	0
mmu-mir-712_9_36_+	9	36	.........CTCCTTCACCCGGGCGGTACCCGCTCC.........................................................................	27	CTCCTTCACCCGGGCGGTACCCGCTCC	16	3.1284	0.0319224	0	0	0	0.0539	0.0469	0	0	0.0938	0	0	0	0	0	0	0	0	0	0	0	0	0	0	0	0	0	0	0	0	0	0	0	0	0	0	0	0	0	0	0	0	0
mmu-mir-712_28_47_+	28	47	............................CCCGCTCCGGCGCCGGCCC..............................................................	19	CCCGCTCCGGCGCCGGCCC	16	2.8331	0.0289092	0.0607	0	0	0	0	0	0	0.1406	0.1472	0	0	0	0	0	0	0	0	0	0	0	0	0	0	0	0	0	0	0	0	0	0	0	0	0	0	0	0	0	0	0	0
mmu-mir-712_34_56_+	34	56	..................................CCGGCGCCGGCCCGCGGGACGC.....................................................	22	CCGGCGCCGGCCCGCGGGACGC	16	2.1524	0.0219633	0.1213	0	0.3084	0	0	0	0	0	0.1963	0	0	0	0	0	0	0	0	0	0	0	0	0	0	0	0	0	0	0	0.3615	0	0	0	0	0	0	0	0	0	0	0	0
mmu-mir-712_76_96_+	76	96	............................................................................GCGAGTCACCCCCGGGTGTT.............	20	GCGAGTCACCCCCGGGTGTT	16	1.9146	0.0195367	0	0	0	0	0	0	0	0	0	0	0	0	0	0	0	0	0	0	0	0	0	0	0	0	0	0	0	0	0.3615	0	0	0	0	0	0	0	0	0	0	0	0
mmu-mir-712_11_36_+	11	36	...........CCTTCACCCGGGCGGTACCCGCTCC.........................................................................	25	CCTTCACCCGGGCGGTACCCGCTCC	15	2.8153	0.0287276	0	0	0	0.1077	0	0	0	0	0.0982	0	0	0	0	0	0	0	0	0	0	0	0	0	0	0	0	0	0	0	0	0	0	0	0	0	0	0	0	0	0	0	0
mmu-mir-712_12_36_+	12	36	............CTTCACCCGGGCGGTACCCGCTCC.........................................................................	24	CTTCACCCGGGCGGTACCCGCTCC	15	1.9866	0.0202714	0.1213	0.1976	0	0	0	0	0	0.0469	0.1963	0	0	0	0	0	0	0	0	0	0	0	0	0	0	0	0	0	0	0	0	0	0	0	0	0	0	0	0	0	0	0.469	0
mmu-mir-712_28_54_+	28	54	............................CCCGCTCCGGCGCCGGCCCGCGGGAC.......................................................	26	CCCGCTCCGGCGCCGGCCCGCGGGAC	15	3.8944	0.0397388	0	0	0	0	0	0	0	0.0469	0	0	0	0	0	0	0	0	0	0	0	0	0	0	0	0	0	0	0	0	0	0	0	0	0	0	0	0	0	0	0	0	0
mmu-mir-712_36_54_+	36	54	....................................GGCGCCGGCCCGCGGGAC.......................................................	18	GGCGCCGGCCCGCGGGAC	15	3.6165	0.0369031	0	0	0	0	0	0	0	0	0	0	0	0	0	0	0	0	0	0	0	0	0	0	0	0	0	0	0	0	0	0	0	0	0	0	0	0	0	0	0	0	0
mmu-mir-712_75_99_+	75	99	...........................................................................TGCGAGTCACCCCCGGGTGTTGCG..........	24	TGCGAGTCACCCCCGGGTGTTGCG	15	3.5914	0.0366469	0	0	0	0	0	0	0	0	0	0	0	0	0	0	0	0	0	0	0	0	0	0	0	0	0	0	0	0	0.723	0	0	0	0	0	0	0	0	0	0	0	0
mmu-mir-712_81_107_+	81	107	.................................................................................TCACCCCCGGGTGTTGCGAGTTCGGG..	26	TCACCCCCGGGTGTTGCGAGTTCGGG	15	1.3205	0.0134745	0	0	0	0.0539	0	0	0	0	0	0	0	0	0	0	0	0	0	0	0	0	0	0	0	0	0	0	0	0	0	0	0	0	0	0	0	0	0	0	0	0	0
mmu-mir-712_83_108_+	83	108	...................................................................................ACCCCCGGGTGTTGCGAGTTCGGGG.	25	ACCCCCGGGTGTTGCGAGTTCGGGG	15	2.0645	0.0210663	0.1213	0	0.37	0.0539	0	0	0	0	0.0491	0	0	0	0	0	0	0	0	0	0	0	0	0	0	0	0	0	0	0	0.3615	0	0	0	0	0	0	0	0	0	0	0	0
mmu-mir-712_0_23_+	0	23	TCTCCGCTTCTCCTTCACCCGGG......................................................................................	23	TCTCCGCTTCTCCTTCACCCGGG	14	0.9054	0.00923878	0.1213	0.1976	0.2467	0.0539	0	0.0612	0.0562	0	0	0	0	0	0	0	0	0	0	0	0	0	0	0	0	0	0	0	0	0	0	0	0	0	0	0	0	0	0	0	0	0	0
mmu-mir-712_6_33_+	6	33	......CTTCTCCTTCACCCGGGCGGTACCCGC............................................................................	27	CTTCTCCTTCACCCGGGCGGTACCCGC	14	0.6614	0.00674898	0	0.0988	0	0	0	0	0	0.5626	0	0	0	0	0	0	0	0	0	0	0	0	0	0	0	0	0	0	0	0	0	0	0	0	0	0	0	0	0	0	0	0	0
mmu-mir-712_12_32_+	12	32	............CTTCACCCGGGCGGTACCCG.............................................................................	20	CTTCACCCGGGCGGTACCCG	14	0.915	0.00933673	0	0.0988	0.3084	0.1077	0	0.1835	0	0	0.0491	0	0	0	0	0	0	0	0	0	0	0	0	0	0	0	0	0	0	0	0	0	0	0	0	0	0	0	0	0	0	0	0
mmu-mir-712_17_37_+	17	37	.................CCCGGGCGGTACCCGCTCCG........................................................................	20	CCCGGGCGGTACCCGCTCCG	14	1.1084	0.0113102	0	0	0	0.5386	0	0	0	0.0469	0.0982	0	0	0	0	0	0	0	0	0	0	0	0	0	0	0	0	0	0	0	0	0	0	0	0	0	0	0	0	0	0	0	0
mmu-mir-712_27_50_+	27	50	...........................ACCCGCTCCGGCGCCGGCCCGCG...........................................................	23	ACCCGCTCCGGCGCCGGCCCGCG	14	2.4729	0.0252337	0	0	0.4317	0	0	0	0	0	0	0	0	0	0	0	0	0	0	0	0	0	0	0	0	0	0	0	0	0	0	0	0	0	0	0	0	0	0	0	0	0	0
mmu-mir-712_27_52_+	27	52	...........................ACCCGCTCCGGCGCCGGCCCGCGGG.........................................................	25	ACCCGCTCCGGCGCCGGCCCGCGGG	14	3.9424	0.0402286	0	0	0	0	0	0	0	0	0	0	0	0	0	0	0	0	0	0	0	0	0	0	0	0	0	0	0	0	0	0	0	0	0	0	0	0	0	0	0	0	0
mmu-mir-712_32_50_+	32	50	................................CTCCGGCGCCGGCCCGCG...........................................................	18	CTCCGGCGCCGGCCCGCG	14	0.8008	0.00817143	0	0.0988	0	0	0	0.0612	0	0.3751	0.0982	0	0	0	0	0	0	0	0	0	0	0	0	0	0	0	0	0	0	0	0	0	0	0	0	0	0	0	0	0	0	0	0
mmu-mir-712_47_71_+	47	71	...............................................GCGGGACGCCGCGGCGTCCGTGCG......................................	24	GCGGGACGCCGCGGCGTCCGTGCG	14	2.5296	0.0258122	0	0	0	0	0	0	0	0	0	0	0	0	0	0	0	0.7371	0	0	0	0	0	0	0	0	0	0	0	0	0	0	0	0	0	0	0	0	0	0	0	0	0
mmu-mir-712_77_101_+	77	101	.............................................................................CGAGTCACCCCCGGGTGTTGCGAG........	24	CGAGTCACCCCCGGGTGTTGCGAG	14	1.7409	0.0177643	0	0	0	0	0	0	0	0	0	0	0	0	0	0	0	0	0	0	0	0	0	0	0	0	0	0	0	0	0	0	0	0	0	0	0	0	0	0	0	0	0
mmu-mir-712_9_34_+	9	34	.........CTCCTTCACCCGGGCGGTACCCGCT...........................................................................	25	CTCCTTCACCCGGGCGGTACCCGCT	13	0.7133	0.00727857	0	0.2964	0.37	0	0	0	0	0.0469	0	0	0	0	0	0	0	0	0	0	0	0	0	0	0	0	0	0	0	0	0	0	0	0	0	0	0	0	0	0	0	0	0
mmu-mir-712_16_42_+	16	42	................ACCCGGGCGGTACCCGCTCCGGCGCC...................................................................	26	ACCCGGGCGGTACCCGCTCCGGCGCC	13	3.79	0.0386735	0	0	0	0	0	0	0	0	0	0	0	0	0	0	0	0	0	0	0	0	0	0	0	0	0	0	0	0	0	0	0	0	0	0	0	0	0	0	0	0	0
mmu-mir-712_29_51_+	29	51	.............................CCGCTCCGGCGCCGGCCCGCGG..........................................................	22	CCGCTCCGGCGCCGGCCCGCGG	13	1.4696	0.0149959	0	0	0.4934	0	0	0	0	0.0469	0	0	0	0	0	0	0	0	0	0	0	0	0	0	0	0	0	0	0	0	0	0	0	0	0	0	0	0	0	0	0	0	0
mmu-mir-712_29_56_+	29	56	.............................CCGCTCCGGCGCCGGCCCGCGGGACGC.....................................................	27	CCGCTCCGGCGCCGGCCCGCGGGACGC	13	0.7174	0.00732041	0.3033	0.0988	0.1233	0	0	0	0	0.0938	0.0982	0	0	0	0	0	0	0	0	0	0	0	0	0	0	0	0	0	0	0	0	0	0	0	0	0	0	0	0	0	0	0	0
mmu-mir-712_35_59_+	35	59	...................................CGGCGCCGGCCCGCGGGACGCCGC..................................................	24	CGGCGCCGGCCCGCGGGACGCCGC	13	1.9214	0.0196061	0	0	0.3084	0	0	0	0	0.0938	0	0	0	0	0	0	0	0	0	0	0	0	0	0	0	0	0	0	0	0	0	0	0	0	0	0	0	0	0	0	0	0	0
mmu-mir-712_61_80_+	61	80	.............................................................CGTCCGTGCGCCGATGCGA.............................	19	CGTCCGTGCGCCGATGCGA	13	4.5939	0.0468765	0	0.247	0	0	0.0938	0	0	0	0.0491	0	0	0	0	0	0	0	0	3.0202	0.7244	0	0	0	0	0	0	0	0	0	0	0	0	0	0	0	0	0	0	0	0	0	0
mmu-mir-712_76_95_+	76	95	............................................................................GCGAGTCACCCCCGGGTGT..............	19	GCGAGTCACCCCCGGGTGT	13	1.3642	0.0139204	0	0	0	0	0	0	0	0	0	0	0	0	0	0	0	0	0	0	0	0	0	0	0	0	0	0	0	0	0	0	0	0	0	0	0	0	0	0	0	0	0
mmu-mir-712_81_102_+	81	102	.................................................................................TCACCCCCGGGTGTTGCGAGT.......	21	TCACCCCCGGGTGTTGCGAGT	13	40.3612	0.411849	0	0	0	0	0	0	0	0	0.1472	0	0	0	0	0	0	0	0	0	0	0	0	0	0	0	0	0	0	0	0.3615	0	0	0	0	0	0	0	0	0	0	0.469	0
mmu-mir-712_6_25_+	6	25	......CTTCTCCTTCACCCGGGCG....................................................................................	19	CTTCTCCTTCACCCGGGCG	12	1.7239	0.0175908	0.1213	0	0.37	0	0	0	0	0	0	0	0	0	0	0	0	0	0	0	0	0	0	0	0	0	0	0	0	0	1.0845	0	0	0	0	0	0	0	0	0	0	0	0
mmu-mir-712_9_28_+	9	28	.........CTCCTTCACCCGGGCGGTA.................................................................................	19	CTCCTTCACCCGGGCGGTA	12	1.1191	0.0114194	0	0	0.4317	0	0	0.0612	0	0	0	0	0	0	0	0	0	0	0	0	0	0	0	0	0	0	0	0	0	0	0.3615	0	0	0	0	0	0	0	0	0	0	0	0
mmu-mir-712_19_39_+	19	39	...................CGGGCGGTACCCGCTCCGGC......................................................................	20	CGGGCGGTACCCGCTCCGGC	12	1.0409	0.0106214	0.182	0	0.2467	0	0	0	0	0.1875	0	0	0	0	0	0	0	0	0	0	0	0	0	0	0	0	0	0	0	0	0	0	0	0	0	0	0	0	0	0	0	0	0
mmu-mir-712_25_47_+	25	47	.........................GTACCCGCTCCGGCGCCGGCCC..............................................................	22	GTACCCGCTCCGGCGCCGGCCC	12	2.2879	0.0233459	0	0	0.2467	0	0	0.2447	0	0	0	0	0	0	0	0	0	0	0	0	0	0	0	0	0	0	0	0	0	0	0	0	0	0	0	0	0	0	0	0	0	1.407	0.3895
mmu-mir-712_27_45_+	27	45	...........................ACCCGCTCCGGCGCCGGC................................................................	18	ACCCGCTCCGGCGCCGGC	12	4.1552	0.0424	0	0	0	0	0	0	0	0	0	0	0	0	0	0	0	0	0	0	0	0	0	0	0	0	0	0	0	0	0	0	0	0	0	0	0	0	0	0	0	0	0
mmu-mir-712_30_49_+	30	49	..............................CGCTCCGGCGCCGGCCCGC............................................................	19	CGCTCCGGCGCCGGCCCGC	12	3.4689	0.0353969	0	0	0	0.0539	0.1407	0	0	0	0	0	0	0	0	0	0	0	0	0	0	0	0	0	0	0	0	0	0	0	1.8075	0	0	0	0	0	0	0	0	0	0	0	0
mmu-mir-712_31_52_+	31	52	...............................GCTCCGGCGCCGGCCCGCGGG.........................................................	21	GCTCCGGCGCCGGCCCGCGGG	12	0.6951	0.00709286	0.3033	0	0.2467	0	0	0	0	0.0469	0.0982	0	0	0	0	0	0	0	0	0	0	0	0	0	0	0	0	0	0	0	0	0	0	0	0	0	0	0	0	0	0	0	0
mmu-mir-712_31_60_+	31	60	...............................GCTCCGGCGCCGGCCCGCGGGACGCCGCG.................................................	29	GCTCCGGCGCCGGCCCGCGGGACGCCGCG	12	0.7339	0.00748878	0.3639	0	0.37	0	0	0	0	0	0	0	0	0	0	0	0	0	0	0	0	0	0	0	0	0	0	0	0	0	0	0	0	0	0	0	0	0	0	0	0	0	0
mmu-mir-712_35_58_+	35	58	...................................CGGCGCCGGCCCGCGGGACGCCG...................................................	23	CGGCGCCGGCCCGCGGGACGCCG	12	2.309	0.0235612	0	0	0	0	0	0	0	0.0469	0.1472	0	0	0	0	0	0	0	0	0	0	0	0	0	0	0	0	0	0	0	0	0	0	0	0	0	0	0	0	0	0	0	0
mmu-mir-712_38_61_+	38	61	......................................CGCCGGCCCGCGGGACGCCGCGG................................................	23	CGCCGGCCCGCGGGACGCCGCGG	12	1.1087	0.0113133	0.1213	0	0.37	0.0539	0	0	0	0.0469	0	0	0	0	0	0	0	0	0	0	0	0	0	0	0	0	0	0	0	0	0	0	0	0	0	0	0	0	0	0	0	0	0
mmu-mir-712_39_61_+	39	61	.......................................GCCGGCCCGCGGGACGCCGCGG................................................	22	GCCGGCCCGCGGGACGCCGCGG	12	1.946	0.0198571	0	0	0	0	0	0	0	0.2344	0.1472	0	0	0	0	0	0	0	0	0	0	1.338	0	0	0	0	0	0	0	0	0	0	0	0	0	0	0	0	0	0	0	0	0
mmu-mir-712_41_62_+	41	62	.........................................CGGCCCGCGGGACGCCGCGGC...............................................	21	CGGCCCGCGGGACGCCGCGGC	12	2.1403	0.0218398	0	0	0.2467	0	0	0	0	0.1875	0.0982	0	0	0	0	0	0	0	0	0	0	0	0	0	0.8775	0.7304	0	0	0	0	0	0	0	0	0	0	0	0	0	0	0	0	0
mmu-mir-712_46_67_+	46	67	..............................................CGCGGGACGCCGCGGCGTCCG..........................................	21	CGCGGGACGCCGCGGCGTCCG	12	0.7043	0.00718673	0.0607	0.0494	0.4934	0.0539	0	0	0	0.0469	0	0	0	0	0	0	0	0	0	0	0	0	0	0	0	0	0	0	0	0	0	0	0	0	0	0	0	0	0	0	0	0	0
mmu-mir-712_51_75_+	51	75	...................................................GACGCCGCGGCGTCCGTGCGCCGA..................................	24	GACGCCGCGGCGTCCGTGCGCCGA	12	1.7216	0.0175673	0	0	0	0	0	0	0	0	0	0	0	0	0	0	0	0	0	0	0	0	0	0	0	0	0	0	0	0	0	0	0	0	0	0	0	0	0	0	0	0	0
mmu-mir-712_86_109_+	86	109	......................................................................................CCCGGGTGTTGCGAGTTCGGGGA	23	CCCGGGTGTTGCGAGTTCGGGGA	12	2.3232	0.0237061	0	0	0	0	0	0	0	0	0	0	0	0	0	0	0	0	0	0	0	0	0	0	0	0	0	0	0	0	0.3615	0	0	0	0	0	0	0	0	0	0	0	0
mmu-mir-712_2_25_+	2	25	..TCCGCTTCTCCTTCACCCGGGCG....................................................................................	23	TCCGCTTCTCCTTCACCCGGGCG	11	0.8684	0.00886122	0	0	0	0	0	0	0.4499	0.0938	0	0	0	0	0	0	0	0	0	0	0	0	0	0	0	0	0	0	0	0	0	0	0	0	0	0	0	0	0	0	0	0	0
mmu-mir-712_9_31_+	9	31	.........CTCCTTCACCCGGGCGGTACCC..............................................................................	22	CTCCTTCACCCGGGCGGTACCC	11	1.0921	0.0111439	0.1213	0	0.3084	0.0539	0	0	0	0	0	0	0	0	0	0	0	0	0	0	0	0	0	0	0	0	0	0	0	0	0	0	0	0	0	0	0	0	0	0	0	0	0
mmu-mir-712_18_43_+	18	43	..................CCGGGCGGTACCCGCTCCGGCGCCG..................................................................	25	CCGGGCGGTACCCGCTCCGGCGCCG	11	0.5285	0.00539286	0	0.247	0	0	0.2346	0	0	0.0469	0	0	0	0	0	0	0	0	0	0	0	0	0	0	0	0	0	0	0	0	0	0	0	0	0	0	0	0	0	0	0	0	0
mmu-mir-712_31_54_+	31	54	...............................GCTCCGGCGCCGGCCCGCGGGAC.......................................................	23	GCTCCGGCGCCGGCCCGCGGGAC	11	4.325	0.0441327	0	0	0	0	0	0	0	0	0	0	0	0	0	0	0	0	0	0	0	0	0	0	0.8775	0.7304	0	0	0	0	0	0	0	0	0	0	0	0	0	0	0	0	0
mmu-mir-712_32_51_+	32	51	................................CTCCGGCGCCGGCCCGCGG..........................................................	19	CTCCGGCGCCGGCCCGCGG	11	0.5284	0.00539184	0	0.0494	0	0	0	0	0.2812	0.1875	0	0	0	0	0	0	0	0	0	0	0	0	0	0	0	0	0	0	0	0	0	0	0	0	0	0	0	0	0	0	0	0	0
mmu-mir-712_39_58_+	39	58	.......................................GCCGGCCCGCGGGACGCCG...................................................	19	GCCGGCCCGCGGGACGCCG	11	2.7168	0.0277224	0	0	0	0	0	0	0	0	0.0982	0	0	0	0	0	0	0	0	0	0	0	0	0	0	0	0	0	0	0	0	0	0	0	0	0	0	0	0	0	0	0	0
mmu-mir-712_44_70_+	44	70	............................................CCCGCGGGACGCCGCGGCGTCCGTGC.......................................	26	CCCGCGGGACGCCGCGGCGTCCGTGC	11	1.3052	0.0133184	0.1213	0	0.3084	0	0.0469	0	0	0	0.0982	0	0	0	0	0	0	0	0	0	0	0	0	0	0	0.7304	0	0	0	0	0	0	0	0	0	0	0	0	0	0	0	0	0
mmu-mir-712_54_75_+	54	75	......................................................GCCGCGGCGTCCGTGCGCCGA..................................	21	GCCGCGGCGTCCGTGCGCCGA	11	1.8606	0.0189857	0	0	0	0	0	0	0	0.0469	0	0	0	0	0	0	0	0	0	0	0	0	0	0	0	0	0	0	0	0	0	0	0	0	0	0	0	0	0	0	0	0	0
mmu-mir-712_54_79_+	54	79	......................................................GCCGCGGCGTCCGTGCGCCGATGCG..............................	25	GCCGCGGCGTCCGTGCGCCGATGCG	11	1.2838	0.0131	0	0	0	0	0	0	0	0	0	0	0	0	0	0	0	0	0	0	0	0	0	0	0	0	0	0	0	0	0	0	0	0	0	0.1894	0	0	0	0	0	0	0
mmu-mir-712_87_105_+	87	105	.......................................................................................CCGGGTGTTGCGAGTTCG....	18	CCGGGTGTTGCGAGTTCG	11	5.9033	0.0602378	0	0	0	0	0	0	0.3936	0	0	0	0	0	0	0	0	0	0	0	0	0	0	0	0.8775	0	4.3361	0	0	0	0	0	0	0	0	0	0	0	0	0	0	0	0
mmu-mir-712_11_32_+	11	32	...........CCTTCACCCGGGCGGTACCCG.............................................................................	21	CCTTCACCCGGGCGGTACCCG	10	0.8674	0.00885102	0	0	0	0	0	0.1835	0	0	0.2454	0	0	0	0	0	0	0	0	0	0	0	0	0	0	0	0	0	0	0	0	0	0	0	0	0	0	0	0	0	0	0	0
mmu-mir-712_11_33_+	11	33	...........CCTTCACCCGGGCGGTACCCGC............................................................................	22	CCTTCACCCGGGCGGTACCCGC	10	1.4429	0.0147235	0	0	0	0	0.0469	0	0	0	0	0	0	0	0	0	0	0	0	0	0	0	0	0	0	0	0	0	0	0	0	0	0	0	0	0	0	0	0	0	0	0	0
mmu-mir-712_14_34_+	14	34	..............TCACCCGGGCGGTACCCGCT...........................................................................	20	TCACCCGGGCGGTACCCGCT	10	2.4699	0.0252031	0.2426	0	0	0	0	0	0	0	0	0	0	0	0	0	0	0	0	0	0	0	0	0	0	0	0	0	0	0	0	0	0	0	0	0	0	0	0	0	0	0	0
mmu-mir-712_16_34_+	16	34	................ACCCGGGCGGTACCCGCT...........................................................................	18	ACCCGGGCGGTACCCGCT	10	3.2232	0.0328898	0	0	0	0	0	0	0	0	0	0	0	0	0	0	0	0	0	0	0	0	0	0	0	0	0	0	0	0	0	0	0	0	0	0	0	0	0	0	0	0	0
mmu-mir-712_19_40_+	19	40	...................CGGGCGGTACCCGCTCCGGCG.....................................................................	21	CGGGCGGTACCCGCTCCGGCG	10	0.6712	0.00684898	0.1213	0	0.2467	0	0	0	0	0	0.0982	0	0	0	0	0	0	0	0	0	0	0	0	0	0	0	0	0	0	0	0	0	0	0	0	0	0	0	0	0	0	0	0
mmu-mir-712_19_47_+	19	47	...................CGGGCGGTACCCGCTCCGGCGCCGGCCC..............................................................	28	CGGGCGGTACCCGCTCCGGCGCCGGCCC	10	0.5831	0.00595	0.182	0	0.185	0	0.0469	0.1223	0	0.0469	0	0	0	0	0	0	0	0	0	0	0	0	0	0	0	0	0	0	0	0	0	0	0	0	0	0	0	0	0	0	0	0	0
mmu-mir-712_31_61_+	31	61	...............................GCTCCGGCGCCGGCCCGCGGGACGCCGCGG................................................	30	GCTCCGGCGCCGGCCCGCGGGACGCCGCGG	10	0.5112	0.00521633	0.1213	0.247	0	0	0	0	0	0.0938	0.0491	0	0	0	0	0	0	0	0	0	0	0	0	0	0	0	0	0	0	0	0	0	0	0	0	0	0	0	0	0	0	0	0
mmu-mir-712_32_53_+	32	53	................................CTCCGGCGCCGGCCCGCGGGA........................................................	21	CTCCGGCGCCGGCCCGCGGGA	10	0.7899	0.0080602	0.182	0.0494	0	0	0	0	0.0562	0.1406	0	0	0	0	0	0	0	0	0	0	0	0	0	0	0	0	0	0	0	0	0	0	0	0	0	0	0	0	0	0	0	0	0
mmu-mir-712_36_58_+	36	58	....................................GGCGCCGGCCCGCGGGACGCCG...................................................	22	GGCGCCGGCCCGCGGGACGCCG	10	2.9693	0.030299	0	0	0	0	0	0	0	0	0	0	0	0	0	0	0	0	0	0	0	0	0	0	0	0	0	0	0	0	0	0	0	0	0	0	0	0	0	0	0	0	0
mmu-mir-712_36_62_+	36	62	....................................GGCGCCGGCCCGCGGGACGCCGCGGC...............................................	26	GGCGCCGGCCCGCGGGACGCCGCGGC	10	2.4332	0.0248286	0	0	0	0	0	0	0	0	0	0	0	0	0	0	0	0	0	0	0	0	0	0	0	0	0	0	0	0	0	0	0	0	0	0	0	0	0	0	0	0	0
mmu-mir-712_38_57_+	38	57	......................................CGCCGGCCCGCGGGACGCC....................................................	19	CGCCGGCCCGCGGGACGCC	10	1.6079	0.0164071	0.182	0	0	0	0	0	0	0	0.0491	0	0	0	0	0	0	0	0	0	0	0	0	0	0	0	0	0	0	0	0	0	0	0	0	0	0	0	0	0	0	0	0
mmu-mir-712_41_59_+	41	59	.........................................CGGCCCGCGGGACGCCGC..................................................	18	CGGCCCGCGGGACGCCGC	10	0.6026	0.00614898	0.0607	0	0	0.0539	0	0.1223	0	0	0.1963	0	0	0	0	0	0	0	0	0	0	0	0	0	0	0	0	0	0	0	0	0	0	0	0	0	0	0	0	0	0	0	0
mmu-mir-712_49_75_+	49	75	.................................................GGGACGCCGCGGCGTCCGTGCGCCGA..................................	26	GGGACGCCGCGGCGTCCGTGCGCCGA	10	0.9308	0.00949796	0	0	0	0	0	0	0.5061	0	0	0	0	0	0	0	0	0	0	0	0	0	0	0	0	0	0	0	0	0	0	0	0	0	0	0	0	0	0	0	0	0	0
mmu-mir-712_59_80_+	59	80	...........................................................GGCGTCCGTGCGCCGATGCGA.............................	21	GGCGTCCGTGCGCCGATGCGA	10	21.7491	0.22193	0	0	0	0	0	0	0	0	0	0	0	0	0	0	0	0	0	0	0	1.338	0	0	0	0	0	19.4428	0	0	0	0	0	0	0	0	0	0	0	0	0	0	0
mmu-mir-712_77_99_+	77	99	.............................................................................CGAGTCACCCCCGGGTGTTGCG..........	22	CGAGTCACCCCCGGGTGTTGCG	10	5.0601	0.0516337	0	0	0	0	0	0	0.1687	0	0	0	0	0	0	0	0	0	0	3.0202	0.7244	0	0	0	0	0	0	0	0	0	0.3615	0	0	0	0	0	0	0	0	0	0	0	0
mmu-mir-712_80_106_+	80	106	................................................................................GTCACCCCCGGGTGTTGCGAGTTCGG...	26	GTCACCCCCGGGTGTTGCGAGTTCGG	10	1.4763	0.0150643	0	0	0	0	0	0	0	0	0	0	0	0	0	0	0	0	0	0	0	0	0	0	0	0	0	0	0	0	0	0	0	0	0	0	0	0	0	0	0	0	0
mmu-mir-712_81_104_+	81	104	.................................................................................TCACCCCCGGGTGTTGCGAGTTC.....	23	TCACCCCCGGGTGTTGCGAGTTC	10	0.8461	0.00863367	0	0	0.185	0	0	0	0	0.0469	0	0	0	0	0	0	0	0	0	0	0	0	0	0	0	0	0	0	0	0	0	0	0	0	0	0	0	0	0	0	0	0	0
mmu-mir-712_0_22_+	0	22	TCTCCGCTTCTCCTTCACCCGG.......................................................................................	22	TCTCCGCTTCTCCTTCACCCGG	9	0.434	0.00442857	0	0	0	0.2693	0	0	0.0562	0	0.0982	0	0	0	0	0	0	0	0	0	0	0	0	0	0	0	0	0	0	0	0	0	0	0	0	0	0	0	0	0	0	0	0
mmu-mir-712_2_23_+	2	23	..TCCGCTTCTCCTTCACCCGGG......................................................................................	21	TCCGCTTCTCCTTCACCCGGG	9	0.4892	0.00499184	0	0.1976	0	0	0.0469	0.2447	0	0	0	0	0	0	0	0	0	0	0	0	0	0	0	0	0	0	0	0	0	0	0	0	0	0	0	0	0	0	0	0	0	0	0
mmu-mir-712_3_23_+	3	23	...CCGCTTCTCCTTCACCCGGG......................................................................................	20	CCGCTTCTCCTTCACCCGGG	9	0.5534	0.00564694	0.0607	0	0	0	0	0	0.3374	0	0.0491	0	0	0	0	0	0	0	0	0	0	0	0	0	0	0	0	0	0	0	0	0	0	0	0	0	0	0	0	0	0	0	0
mmu-mir-712_4_23_+	4	23	....CGCTTCTCCTTCACCCGGG......................................................................................	19	CGCTTCTCCTTCACCCGGG	9	0.5077	0.00518061	0.182	0	0.185	0	0.0938	0	0	0.0469	0	0	0	0	0	0	0	0	0	0	0	0	0	0	0	0	0	0	0	0	0	0	0	0	0	0	0	0	0	0	0	0	0
mmu-mir-712_18_40_+	18	40	..................CCGGGCGGTACCCGCTCCGGCG.....................................................................	22	CCGGGCGGTACCCGCTCCGGCG	9	0.5199	0.0053051	0	0	0.37	0.0539	0.0469	0	0	0	0.0491	0	0	0	0	0	0	0	0	0	0	0	0	0	0	0	0	0	0	0	0	0	0	0	0	0	0	0	0	0	0	0	0
mmu-mir-712_19_45_+	19	45	...................CGGGCGGTACCCGCTCCGGCGCCGGC................................................................	26	CGGGCGGTACCCGCTCCGGCGCCGGC	9	0.4887	0.00498673	0	0.1482	0.2467	0	0	0	0	0.0938	0	0	0	0	0	0	0	0	0	0	0	0	0	0	0	0	0	0	0	0	0	0	0	0	0	0	0	0	0	0	0	0	0
mmu-mir-712_26_49_+	26	49	..........................TACCCGCTCCGGCGCCGGCCCGC............................................................	23	TACCCGCTCCGGCGCCGGCCCGC	9	4.6114	0.0470551	0	0	0	0	0	0	0	0	0	0	0	0	0	0	0	0	0	0	0	0	0	2.7456	0	0	0	0	0	0	0	0	0	0	0	0	0	0	0	0.2973	0	0.938	0
mmu-mir-712_30_53_+	30	53	..............................CGCTCCGGCGCCGGCCCGCGGGA........................................................	23	CGCTCCGGCGCCGGCCCGCGGGA	9	0.8196	0.00836327	0	0.3458	0	0	0	0	0	0	0.0491	0	0	0	0	0	0	0	0	0	0	0	0	0	0	0	0	0	0	0	0	0	0	0	0	0	0	0	0	0	0	0	0
mmu-mir-712_32_61_+	32	61	................................CTCCGGCGCCGGCCCGCGGGACGCCGCGG................................................	29	CTCCGGCGCCGGCCCGCGGGACGCCGCGG	9	0.5135	0.0052398	0.2426	0.0494	0.1233	0	0	0	0	0	0.0982	0	0	0	0	0	0	0	0	0	0	0	0	0	0	0	0	0	0	0	0	0	0	0	0	0	0	0	0	0	0	0	0
mmu-mir-712_40_58_+	40	58	........................................CCGGCCCGCGGGACGCCG...................................................	18	CCGGCCCGCGGGACGCCG	9	0.7497	0.00765	0	0	0	0	0	0.0612	0	0.0938	0.1472	0	0	0	0	0	0	0	0	0	0	0	0	0	0	0	0	0	0	0	0	0	0	0	0	0	0	0	0	0	0	0	0
mmu-mir-712_44_67_+	44	67	............................................CCCGCGGGACGCCGCGGCGTCCG..........................................	23	CCCGCGGGACGCCGCGGCGTCCG	9	0.557	0.00568367	0.0607	0	0.3084	0	0	0	0	0.0469	0.0491	0	0	0	0	0	0	0	0	0	0	0	0	0	0	0	0	0	0	0	0	0	0	0	0	0	0	0	0	0	0	0	0
mmu-mir-712_47_70_+	47	70	...............................................GCGGGACGCCGCGGCGTCCGTGC.......................................	23	GCGGGACGCCGCGGCGTCCGTGC	9	4.5944	0.0468816	0	0	0	0	0	0	0	0	0	0	0	0	0	0	0	0.7371	0	0	0	0	0	0	0	2.1911	0	0	0	0	0	0	0	0	0	0	0	0	0	0	0	0	0
mmu-mir-712_50_74_+	50	74	..................................................GGACGCCGCGGCGTCCGTGCGCCG...................................	24	GGACGCCGCGGCGTCCGTGCGCCG	9	0.5212	0.00531837	0	0	0	0	0	0	0	0.3751	0	0	0	0	0	0	0	0	0	0	0	0	0	0	0	0	0	0	0	0	0	0	0	0	0	0	0	0	0	0	0	0	0
mmu-mir-712_53_74_+	53	74	.....................................................CGCCGCGGCGTCCGTGCGCCG...................................	21	CGCCGCGGCGTCCGTGCGCCG	9	0.4856	0.0049551	0	0	0.2467	0	0.0469	0	0	0.0938	0.0982	0	0	0	0	0	0	0	0	0	0	0	0	0	0	0	0	0	0	0	0	0	0	0	0	0	0	0	0	0	0	0	0
mmu-mir-712_62_81_+	62	81	..............................................................GTCCGTGCGCCGATGCGAG............................	19	GTCCGTGCGCCGATGCGAG	9	0.8981	0.00916429	0	0	0	0	0	0	0	0.0938	0	0	0	0	0	0	0	0	0	0	0	0	0	0	0	0	0	0	0	0	0	0	0	0	0	0	0	0.2039	0	0	0	0	0
mmu-mir-712_84_103_+	84	103	....................................................................................CCCCCGGGTGTTGCGAGTT......	19	CCCCCGGGTGTTGCGAGTT	9	1.1547	0.0117827	0	0	0.4317	0	0	0	0	0	0	0	0	0	0	0	0	0	0	0	0	0	0	0	0	0	0	0	0	0	0.723	0	0	0	0	0	0	0	0	0	0	0	0
mmu-mir-712_0_21_+	0	21	TCTCCGCTTCTCCTTCACCCG........................................................................................	21	TCTCCGCTTCTCCTTCACCCG	8	0.5426	0.00553673	0	0	0.0617	0.0539	0.0938	0	0	0.0938	0	0	0	0	0	0	0	0	0	0	0	0	0	0	0	0	0	0	0	0	0	0	0	0	0	0	0	0	0	0	0	0	0
mmu-mir-712_1_24_+	1	24	.CTCCGCTTCTCCTTCACCCGGGC.....................................................................................	23	CTCCGCTTCTCCTTCACCCGGGC	8	0.5383	0.00549286	0.2426	0.0494	0	0	0	0	0	0	0.0982	0	0	0	0	0	0	0	0	0	0	0	0	0	0	0	0	0	0	0	0	0	0	0	0	0	0	0	0	0	0	0	0
mmu-mir-712_4_24_+	4	24	....CGCTTCTCCTTCACCCGGGC.....................................................................................	20	CGCTTCTCCTTCACCCGGGC	8	0.415	0.00423469	0	0.0988	0	0.2693	0	0	0	0.0469	0	0	0	0	0	0	0	0	0	0	0	0	0	0	0	0	0	0	0	0	0	0	0	0	0	0	0	0	0	0	0	0	0
mmu-mir-712_9_30_+	9	30	.........CTCCTTCACCCGGGCGGTACC...............................................................................	21	CTCCTTCACCCGGGCGGTACC	8	1.0475	0.0106888	0	0.1976	0	0	0	0	0	0.0469	0	0	0	0	0	0	0	0	0	0	0	0	0	0	0	0	0	0	0	0	0.723	0	0	0	0	0	0	0	0	0	0	0	0
mmu-mir-712_19_43_+	19	43	...................CGGGCGGTACCCGCTCCGGCGCCG..................................................................	24	CGGGCGGTACCCGCTCCGGCGCCG	8	0.8412	0.00858367	0	0	0.3084	0	0.0469	0.0612	0	0	0	0	0	0	0	0	0	0	0	0	0	0	0	0	0	0	0	0	0	0	0	0	0	0	0	0	0	0	0	0	0	0	0
mmu-mir-712_25_48_+	25	48	.........................GTACCCGCTCCGGCGCCGGCCCG.............................................................	23	GTACCCGCTCCGGCGCCGGCCCG	8	0.4638	0.00473265	0	0	0.37	0	0	0	0	0.0938	0	0	0	0	0	0	0	0	0	0	0	0	0	0	0	0	0	0	0	0	0	0	0	0	0	0	0	0	0	0	0	0	0
mmu-mir-712_28_53_+	28	53	............................CCCGCTCCGGCGCCGGCCCGCGGGA........................................................	25	CCCGCTCCGGCGCCGGCCCGCGGGA	8	2.5257	0.0257724	0	0	0	0	0	0	0	0	0	0	0	0	0	0	0	0	0	0	0	0	0	0	0	0	0	0	0	0	0	0	0	0	0	0	0	0	0	0	0	0	0
mmu-mir-712_33_52_+	33	52	.................................TCCGGCGCCGGCCCGCGGG.........................................................	19	TCCGGCGCCGGCCCGCGGG	8	1.1712	0.011951	0	0	0	0	0	0	0	0.0469	0.0491	0	0	0	0	0	0	0	0	0	0	0	0	0	0	0	0	0	0	0	0	0	0	0	0	0	0	0	0	0	0	0.469	0
mmu-mir-712_34_59_+	34	59	..................................CCGGCGCCGGCCCGCGGGACGCCGC..................................................	25	CCGGCGCCGGCCCGCGGGACGCCGC	8	2.4409	0.0249071	0	0	0	0	0	0	0	0	0	0	0	0	0	0	0	0	0	0	0	0	0	0	0	0	0	0	0	0	0	0	0	0	0	0	0	0	0	0	0	0	0
mmu-mir-712_52_73_+	52	73	....................................................ACGCCGCGGCGTCCGTGCGCC....................................	21	ACGCCGCGGCGTCCGTGCGCC	8	1.2419	0.0126724	0	0	0	0	0	0	0	0	0	0	0	0	0	0	0	0	0	0	0	0	0	0	0	0	0	0	0	0	0.3615	0	0	0	0	0	0	0	0	0	0	0	0
mmu-mir-712_53_72_+	53	72	.....................................................CGCCGCGGCGTCCGTGCGC.....................................	19	CGCCGCGGCGTCCGTGCGC	8	0.9235	0.00942347	0	0.0988	0	0	0	0	0	0	0	0	0	0	0	0	0	0	0	0	0	0	0	0	0	0	0	0	0	0	0	0	0	0	0	0	0	0	0	0	0	0	0
mmu-mir-712_57_81_+	57	81	.........................................................GCGGCGTCCGTGCGCCGATGCGAG............................	24	GCGGCGTCCGTGCGCCGATGCGAG	8	1.1014	0.0112388	0	0	0	0	0	0	0	0	0	0	0	0	0	0	0	0	0	0	0	0	0	0	0	0	0	0	0	0	0.3615	0	0	0	0	0	0	0	0	0	0	0	0
mmu-mir-712_59_79_+	59	79	...........................................................GGCGTCCGTGCGCCGATGCG..............................	20	GGCGTCCGTGCGCCGATGCG	8	1.2682	0.0129408	0	0	0	0	0	0	0	0	0	0	0	0	0	0	0	0	0	0	0	0	0	0	0	0	0	0	0	0	0	0	0	0	0	0	0	0	0	0	0	0	0
mmu-mir-712_60_81_+	60	81	............................................................GCGTCCGTGCGCCGATGCGAG............................	21	GCGTCCGTGCGCCGATGCGAG	8	2.4296	0.0247918	0	0	0	0	0	0	0	0	0	0	0	0	0	0	0	0	0	0	0	0	0	0	0	0	0	0	0	0	0.3615	0	0	0	0	0.1894	0	0	0	0	0	0	0
mmu-mir-712_74_92_+	74	92	..........................................................................ATGCGAGTCACCCCCGGG.................	18	ATGCGAGTCACCCCCGGG	8	0.3751	0.00382755	0	0	0	0	0	0	0	0.3751	0	0	0	0	0	0	0	0	0	0	0	0	0	0	0	0	0	0	0	0	0	0	0	0	0	0	0	0	0	0	0	0	0
mmu-mir-712_5_31_+	5	31	.....GCTTCTCCTTCACCCGGGCGGTACCC..............................................................................	26	GCTTCTCCTTCACCCGGGCGGTACCC	7	0.3936	0.00401633	0	0	0	0	0	0	0.3936	0	0	0	0	0	0	0	0	0	0	0	0	0	0	0	0	0	0	0	0	0	0	0	0	0	0	0	0	0	0	0	0	0	0
mmu-mir-712_6_36_+	6	36	......CTTCTCCTTCACCCGGGCGGTACCCGCTCC.........................................................................	30	CTTCTCCTTCACCCGGGCGGTACCCGCTCC	7	0.4855	0.00495408	0	0	0	0	0	0	0.3374	0	0	0	0	0	0	0	0	0	0	0	0	0	0	0	0	0	0	0	0	0	0	0	0	0	0	0	0	0	0	0	0	0	0
mmu-mir-712_13_36_+	13	36	.............TTCACCCGGGCGGTACCCGCTCC.........................................................................	23	TTCACCCGGGCGGTACCCGCTCC	7	1.6917	0.0172622	0	0	0	0	0	0	0	0.0938	0	0	0	0	0	0	0.9094	0	0	0	0	0	0	0	0	0	0	0	0	0	0	0	0	0	0	0	0	0	0	0	0	0	0
mmu-mir-712_14_44_+	14	44	..............TCACCCGGGCGGTACCCGCTCCGGCGCCGG.................................................................	30	TCACCCGGGCGGTACCCGCTCCGGCGCCGG	7	0.4246	0.00433265	0.4246	0	0	0	0	0	0	0	0	0	0	0	0	0	0	0	0	0	0	0	0	0	0	0	0	0	0	0	0	0	0	0	0	0	0	0	0	0	0	0	0
mmu-mir-712_15_38_+	15	38	...............CACCCGGGCGGTACCCGCTCCGG.......................................................................	23	CACCCGGGCGGTACCCGCTCCGG	7	1.2277	0.0125276	0.3033	0	0	0	0.0469	0	0	0	0	0	0	0	0	0	0	0	0	0	0	0	0	0	0.8775	0	0	0	0	0	0	0	0	0	0	0	0	0	0	0	0	0	0
mmu-mir-712_16_44_+	16	44	................ACCCGGGCGGTACCCGCTCCGGCGCCGG.................................................................	28	ACCCGGGCGGTACCCGCTCCGGCGCCGG	7	0.5599	0.00571327	0	0	0	0.1616	0	0	0	0.0938	0	0	0	0	0	0	0	0	0	0	0	0	0	0	0	0	0	0	0	0	0	0	0	0	0	0	0	0	0	0	0	0	0
mmu-mir-712_24_43_+	24	43	........................GGTACCCGCTCCGGCGCCG..................................................................	19	GGTACCCGCTCCGGCGCCG	7	0.5908	0.00602857	0	0.1482	0	0	0	0	0	0	0.0982	0	0	0	0	0	0	0	0	0	0	0	0	0	0	0	0	0	0	0	0	0	0	0	0	0	0	0	0	0	0	0	0
mmu-mir-712_24_48_+	24	48	........................GGTACCCGCTCCGGCGCCGGCCCG.............................................................	24	GGTACCCGCTCCGGCGCCGGCCCG	7	0.4359	0.00444796	0	0	0	0	0	0	0	0.1406	0.1472	0	0	0	0	0	0	0	0	0	0	0	0	0	0	0	0	0	0	0	0	0	0	0	0	0	0	0	0	0	0	0	0
mmu-mir-712_25_43_+	25	43	.........................GTACCCGCTCCGGCGCCG..................................................................	18	GTACCCGCTCCGGCGCCG	7	0.4596	0.0046898	0.0607	0	0	0.1077	0	0	0	0.0469	0.0982	0	0	0	0	0	0	0	0	0	0	0	0	0	0	0	0	0	0	0	0	0	0	0	0	0	0	0	0	0	0	0	0
mmu-mir-712_27_51_+	27	51	...........................ACCCGCTCCGGCGCCGGCCCGCGG..........................................................	24	ACCCGCTCCGGCGCCGGCCCGCGG	7	1.9285	0.0196786	0	0	0	0	0	0	0	0	0	0	0	0	0	0	0	0	0	0	0	0	0	0	0	0	0	0	0	0	0	0	0	0	0	0	0	0	0	0	0	0	0
mmu-mir-712_28_51_+	28	51	............................CCCGCTCCGGCGCCGGCCCGCGG..........................................................	23	CCCGCTCCGGCGCCGGCCCGCGG	7	1.1358	0.0115898	0	0	0	0	0	0	0	0.0469	0.1472	0	0	0	0	0	0	0	0	0	0	0	0	0	0	0	0	0	0	0	0	0	0	0	0	0	0	0	0	0	0	0	0
mmu-mir-712_31_49_+	31	49	...............................GCTCCGGCGCCGGCCCGC............................................................	18	GCTCCGGCGCCGGCCCGC	7	0.9158	0.0093449	0	0	0	0	0	0.1223	0	0.0469	0.0491	0	0	0	0	0	0	0	0	0	0	0	0	0	0	0	0	0	0	0	0.3615	0	0	0	0	0	0	0	0	0	0	0	0
mmu-mir-712_31_51_+	31	51	...............................GCTCCGGCGCCGGCCCGCGG..........................................................	20	GCTCCGGCGCCGGCCCGCGG	7	0.4132	0.00421633	0.1213	0.0988	0	0	0	0	0	0	0.0491	0	0	0	0	0	0	0	0	0	0	0	0	0	0	0	0	0	0	0	0	0	0	0	0	0	0	0	0	0	0	0	0
mmu-mir-712_37_56_+	37	56	.....................................GCGCCGGCCCGCGGGACGC.....................................................	19	GCGCCGGCCCGCGGGACGC	7	1.3632	0.0139102	0	0	0	0	0	0	0	0	0	0	0	0	0	0	0	0	0	0	0	0	0	0	0	0	0	0	0	0	0	0	0	0	0	0	0	0	0	0	0	0	0
mmu-mir-712_38_59_+	38	59	......................................CGCCGGCCCGCGGGACGCCGC..................................................	21	CGCCGGCCCGCGGGACGCCGC	7	1.1461	0.0116949	0	0	0	0	0	0	0.0562	0.0469	0.0491	0	0	0	0	0	0	0	0	0	0	0	0	0	0	0	0	0	0	0	0	0	0	0	0	0	0	0	0	0	0	0	0
mmu-mir-712_40_62_+	40	62	........................................CCGGCCCGCGGGACGCCGCGGC...............................................	22	CCGGCCCGCGGGACGCCGCGGC	7	0.7589	0.00774388	0	0	0	0	0	0	0	0.0469	0	0	0	0	0	0	0	0	0	0	0	0	0	0	0	0	0	0	0	0	0	0	0	0	0	0	0	0	0	0	0	0	0
mmu-mir-712_47_69_+	47	69	...............................................GCGGGACGCCGCGGCGTCCGTG........................................	22	GCGGGACGCCGCGGCGTCCGTG	7	0.5485	0.00559694	0.3033	0	0	0	0.0469	0	0	0	0	0	0	0	0	0	0	0	0	0	0	0	0	0	0	0	0	0	0	0	0	0	0	0	0	0	0	0	0	0	0	0	0
mmu-mir-712_58_79_+	58	79	..........................................................CGGCGTCCGTGCGCCGATGCG..............................	21	CGGCGTCCGTGCGCCGATGCG	7	2.1636	0.0220776	0	0	0	0	0	0	0	0	0	0	0	0	0	0	0.9094	0	0	0	0	0	0	0	0	0	0	0	0	0	1.0845	0	0	0	0	0	0	0	0	0	0	0	0
mmu-mir-712_62_92_+	62	92	..............................................................GTCCGTGCGCCGATGCGAGTCACCCCCGGG.................	30	GTCCGTGCGCCGATGCGAGTCACCCCCGGG	7	0.3568	0.00364082	0.0607	0.247	0	0	0	0	0	0	0.0491	0	0	0	0	0	0	0	0	0	0	0	0	0	0	0	0	0	0	0	0	0	0	0	0	0	0	0	0	0	0	0	0
mmu-mir-712_78_101_+	78	101	..............................................................................GAGTCACCCCCGGGTGTTGCGAG........	23	GAGTCACCCCCGGGTGTTGCGAG	7	2.1469	0.0219071	0	0	0	0	0	0	0	0	0	0	0	0	0	0	0.9094	0	0	0	0	0	0	0	0	0	0	0	0	0	0	0	0	0	0	0	0	0	0	0	0	0	0
mmu-mir-712_88_106_+	88	106	........................................................................................CGGGTGTTGCGAGTTCGG...	18	CGGGTGTTGCGAGTTCGG	7	1.0226	0.0104347	0	0	0	0	0	0	0	0	0	0	0	0	0	0	0	0	0	0	0	0	0	0	0	0	0	0	0	0	0	0	0	0	0	0	0	0	0	0	0	0	0
mmu-mir-712_4_22_+	4	22	....CGCTTCTCCTTCACCCGG.......................................................................................	18	CGCTTCTCCTTCACCCGG	6	0.3502	0.00357347	0.3033	0	0	0	0.0469	0	0	0	0	0	0	0	0	0	0	0	0	0	0	0	0	0	0	0	0	0	0	0	0	0	0	0	0	0	0	0	0	0	0	0	0
mmu-mir-712_4_27_+	4	27	....CGCTTCTCCTTCACCCGGGCGGT..................................................................................	23	CGCTTCTCCTTCACCCGGGCGGT	6	0.4509	0.00460102	0	0.247	0	0	0	0	0	0	0	0	0	0	0	0	0	0	0	0	0	0	0	0	0	0	0	0	0	0	0	0	0	0	0	0	0	0.2039	0	0	0	0	0
mmu-mir-712_5_25_+	5	25	.....GCTTCTCCTTCACCCGGGCG....................................................................................	20	GCTTCTCCTTCACCCGGGCG	6	1.2848	0.0131102	0	0	0	0	0	0	0	0.0469	0	0	0	0	0	0	0	0	0	0	0	0	0	0	0	0	0	0	0	0	0.723	0	0	0	0	0	0	0	0	0	0	0	0
mmu-mir-712_5_32_+	5	32	.....GCTTCTCCTTCACCCGGGCGGTACCCG.............................................................................	27	GCTTCTCCTTCACCCGGGCGGTACCCG	6	0.2813	0.00287041	0	0	0	0	0	0	0	0.2813	0	0	0	0	0	0	0	0	0	0	0	0	0	0	0	0	0	0	0	0	0	0	0	0	0	0	0	0	0	0	0	0	0
mmu-mir-712_7_28_+	7	28	.......TTCTCCTTCACCCGGGCGGTA.................................................................................	21	TTCTCCTTCACCCGGGCGGTA	6	2.1001	0.0214296	0	0	0	0	0.0469	0	0	0	0	0	0	0.6999	0	0	0	0	0	0	0	0	0	0	0.8775	0	0	0	0	0	0.3615	0	0	0	0	0	0	0	0	0	0	0	0
mmu-mir-712_8_36_+	8	36	........TCTCCTTCACCCGGGCGGTACCCGCTCC.........................................................................	28	TCTCCTTCACCCGGGCGGTACCCGCTCC	6	0.2964	0.00302449	0	0.2964	0	0	0	0	0	0	0	0	0	0	0	0	0	0	0	0	0	0	0	0	0	0	0	0	0	0	0	0	0	0	0	0	0	0	0	0	0	0	0
mmu-mir-712_10_31_+	10	31	..........TCCTTCACCCGGGCGGTACCC..............................................................................	21	TCCTTCACCCGGGCGGTACCC	6	0.6717	0.00685408	0	0.247	0	0	0	0	0	0	0	0	0	0	0	0	0	0	0	0	0	0	0	0	0	0	0	0	0	0	0	0	0	0	0	0	0	0	0	0	0	0	0
mmu-mir-712_11_35_+	11	35	...........CCTTCACCCGGGCGGTACCCGCTC..........................................................................	24	CCTTCACCCGGGCGGTACCCGCTC	6	0.7134	0.00727959	0	0	0	0	0	0	0	0	0.1963	0	0	0	0	0	0	0	0	0	0	0	0	0	0	0	0	0	0	0	0	0	0	0	0	0	0	0	0	0	0	0	0
mmu-mir-712_15_42_+	15	42	...............CACCCGGGCGGTACCCGCTCCGGCGCC...................................................................	27	CACCCGGGCGGTACCCGCTCCGGCGCC	6	0.3285	0.00335204	0	0	0	0	0	0	0	0.1875	0.0491	0	0	0	0	0	0	0	0	0	0	0	0	0	0	0	0	0	0	0	0	0	0	0	0	0	0	0	0	0	0	0	0
mmu-mir-712_19_41_+	19	41	...................CGGGCGGTACCCGCTCCGGCGC....................................................................	22	CGGGCGGTACCCGCTCCGGCGC	6	1.1217	0.0114459	0	0.1482	0	0	0	0	0	0.0469	0.0491	0	0	0	0	0	0	0	0	0	0	0	0	0	0.8775	0	0	0	0	0	0	0	0	0	0	0	0	0	0	0	0	0	0
mmu-mir-712_19_42_+	19	42	...................CGGGCGGTACCCGCTCCGGCGCC...................................................................	23	CGGGCGGTACCCGCTCCGGCGCC	6	0.3162	0.00322653	0	0	0	0.2693	0	0	0	0.0469	0	0	0	0	0	0	0	0	0	0	0	0	0	0	0	0	0	0	0	0	0	0	0	0	0	0	0	0	0	0	0	0	0
mmu-mir-712_21_48_+	21	48	.....................GGCGGTACCCGCTCCGGCGCCGGCCCG.............................................................	27	GGCGGTACCCGCTCCGGCGCCGGCCCG	6	0.2857	0.00291531	0	0	0	0	0	0	0	0.1875	0.0982	0	0	0	0	0	0	0	0	0	0	0	0	0	0	0	0	0	0	0	0	0	0	0	0	0	0	0	0	0	0	0	0
mmu-mir-712_23_42_+	23	42	.......................CGGTACCCGCTCCGGCGCC...................................................................	19	CGGTACCCGCTCCGGCGCC	6	0.2914	0.00297347	0	0.1976	0	0	0.0469	0	0	0.0469	0	0	0	0	0	0	0	0	0	0	0	0	0	0	0	0	0	0	0	0	0	0	0	0	0	0	0	0	0	0	0	0	0
mmu-mir-712_24_53_+	24	53	........................GGTACCCGCTCCGGCGCCGGCCCGCGGGA........................................................	29	GGTACCCGCTCCGGCGCCGGCCCGCGGGA	6	0.3639	0.00371327	0.3639	0	0	0	0	0	0	0	0	0	0	0	0	0	0	0	0	0	0	0	0	0	0	0	0	0	0	0	0	0	0	0	0	0	0	0	0	0	0	0	0
mmu-mir-712_29_54_+	29	54	.............................CCGCTCCGGCGCCGGCCCGCGGGAC.......................................................	25	CCGCTCCGGCGCCGGCCCGCGGGAC	6	0.9301	0.00949082	0.1213	0	0	0	0	0	0	0	0	0	0	0	0	0	0	0	0	0	0	0	0	0	0	0	0	0	0	0	0	0	0	0	0	0	0	0	0	0	0	0	0
mmu-mir-712_30_50_+	30	50	..............................CGCTCCGGCGCCGGCCCGCG...........................................................	20	CGCTCCGGCGCCGGCCCGCG	6	1.1825	0.0120663	0	0	0	0	0	0	0	0	0.0982	0	0	0	0	0	0	0	0	0	0	0	0	0	0	0	0	0	0	0	0	0	0	0	0	0	0	0	0	0	0	0	0
mmu-mir-712_31_57_+	31	57	...............................GCTCCGGCGCCGGCCCGCGGGACGCC....................................................	26	GCTCCGGCGCCGGCCCGCGGGACGCC	6	0.3209	0.00327449	0	0.1976	0.1233	0	0	0	0	0	0	0	0	0	0	0	0	0	0	0	0	0	0	0	0	0	0	0	0	0	0	0	0	0	0	0	0	0	0	0	0	0	0
mmu-mir-712_33_60_+	33	60	.................................TCCGGCGCCGGCCCGCGGGACGCCGCG.................................................	27	TCCGGCGCCGGCCCGCGGGACGCCGCG	6	0.7592	0.00774694	0.2426	0	0	0	0	0	0	0	0	0	0	0	0	0	0	0	0	0	0	0	0	0	0	0	0	0	0	0	0	0	0	0	0	0	0	0	0	0	0	0	0
mmu-mir-712_37_57_+	37	57	.....................................GCGCCGGCCCGCGGGACGCC....................................................	20	GCGCCGGCCCGCGGGACGCC	6	1.8585	0.0189643	0	0	0	0	0	0	0	0	0	0	0	0	0	0	0	0	0	0	0	0	0	0	0	0	0	0	0	0	0	0	0	0	0	0	0	0	0	0	0	0	0
mmu-mir-712_39_57_+	39	57	.......................................GCCGGCCCGCGGGACGCC....................................................	18	GCCGGCCCGCGGGACGCC	6	0.8738	0.00891633	0	0	0	0	0	0	0	0.0469	0.0491	0	0	0	0	0	0	0	0	0	0	0	0	0	0	0	0	0	0	0	0	0	0	0	0	0	0	0	0	0	0	0	0
mmu-mir-712_39_59_+	39	59	.......................................GCCGGCCCGCGGGACGCCGC..................................................	20	GCCGGCCCGCGGGACGCCGC	6	1.3222	0.0134918	0	0.1482	0	0	0	0	0	0	0	0	0	0	0	0	0	0	0	0	0	0	0	0	0	0	0	0	0	0	0	0	0	0	0	0	0	0	0	0	0	0	0
mmu-mir-712_40_59_+	40	59	........................................CCGGCCCGCGGGACGCCGC..................................................	19	CCGGCCCGCGGGACGCCGC	6	0.4114	0.00419796	0	0.0988	0	0	0	0.0612	0.0562	0	0.0491	0	0	0	0	0	0	0	0	0	0	0	0	0	0	0	0	0	0	0	0	0	0	0	0	0	0	0	0	0	0	0	0
mmu-mir-712_40_60_+	40	60	........................................CCGGCCCGCGGGACGCCGCG.................................................	20	CCGGCCCGCGGGACGCCGCG	6	1.2864	0.0131265	0	0.0494	0	0	0	0	0	0	0.0491	0	0	0	0	0	0	0	0	0	0	0	0	0	0	0	0	0	0	0	0	0	0	0	0	0	0	0	0	0	0	0	0
mmu-mir-712_41_67_+	41	67	.........................................CGGCCCGCGGGACGCCGCGGCGTCCG..........................................	26	CGGCCCGCGGGACGCCGCGGCGTCCG	6	0.3277	0.00334388	0.182	0.0988	0	0	0	0	0	0.0469	0	0	0	0	0	0	0	0	0	0	0	0	0	0	0	0	0	0	0	0	0	0	0	0	0	0	0	0	0	0	0	0	0
mmu-mir-712_45_67_+	45	67	.............................................CCGCGGGACGCCGCGGCGTCCG..........................................	22	CCGCGGGACGCCGCGGCGTCCG	6	0.3414	0.00348367	0.2426	0.0988	0	0	0	0	0	0	0	0	0	0	0	0	0	0	0	0	0	0	0	0	0	0	0	0	0	0	0	0	0	0	0	0	0	0	0	0	0	0	0
mmu-mir-712_45_69_+	45	69	.............................................CCGCGGGACGCCGCGGCGTCCGTG........................................	24	CCGCGGGACGCCGCGGCGTCCGTG	6	0.3635	0.00370918	0.1213	0	0	0	0	0	0	0	0.0982	0	0	0	0	0	0	0	0	0	0	0	0	0	0	0	0	0	0	0	0	0	0	0	0	0	0	0	0	0	0	0	0
mmu-mir-712_46_69_+	46	69	..............................................CGCGGGACGCCGCGGCGTCCGTG........................................	23	CGCGGGACGCCGCGGCGTCCGTG	6	1.6735	0.0170765	0	0	0.0617	0	0	0	0	0	0.0491	0	0	0	0	0	0	0	0	0	0	0	0	0	0	0.7304	0	0	0	0	0.3615	0	0	0	0	0	0	0	0	0	0	0	0
mmu-mir-712_53_77_+	53	77	.....................................................CGCCGCGGCGTCCGTGCGCCGATG................................	24	CGCCGCGGCGTCCGTGCGCCGATG	6	1.1217	0.0114459	0	0.1482	0	0	0.0469	0	0	0	0.0491	0	0	0	0	0	0	0	0	0	0	0	0	0	0.8775	0	0	0	0	0	0	0	0	0	0	0	0	0	0	0	0	0	0
mmu-mir-712_54_72_+	54	72	......................................................GCCGCGGCGTCCGTGCGC.....................................	18	GCCGCGGCGTCCGTGCGC	6	0.677	0.00690816	0	0	0	0	0	0	0	0	0	0	0	0	0	0	0	0	0	0	0	0	0	0	0	0	0	0	0	0	0	0	0	0	0	0	0	0	0	0	0	0	0
mmu-mir-712_54_73_+	54	73	......................................................GCCGCGGCGTCCGTGCGCC....................................	19	GCCGCGGCGTCCGTGCGCC	6	1.6129	0.0164582	0	0	0	0	0	0	0	0	0	0	0	0	0	0	0	0	0	0	0	0	0	0	0	0	0	0	0	0	0	0	0	0	0	0	0.2451	0	0	0	0	0	0
mmu-mir-712_55_73_+	55	73	.......................................................CCGCGGCGTCCGTGCGCC....................................	18	CCGCGGCGTCCGTGCGCC	6	0.3639	0.00371327	0.3639	0	0	0	0	0	0	0	0	0	0	0	0	0	0	0	0	0	0	0	0	0	0	0	0	0	0	0	0	0	0	0	0	0	0	0	0	0	0	0	0
mmu-mir-712_57_82_+	57	82	.........................................................GCGGCGTCCGTGCGCCGATGCGAGT...........................	25	GCGGCGTCCGTGCGCCGATGCGAGT	6	1.6186	0.0165163	0	0.1482	0	0	0	0	0	0	0	0	0	0	0	0	0	0	0	0	0.7244	0.669	0	0	0	0	0	0	0	0	0	0	0	0	0	0	0	0	0	0	0	0	0
mmu-mir-712_61_81_+	61	81	.............................................................CGTCCGTGCGCCGATGCGAG............................	20	CGTCCGTGCGCCGATGCGAG	6	2.6872	0.0274204	0	0	0	0	0	0	0	0	0	0	0	0	0	0	0	0	0	0	0.7244	0.669	0	0	0	0	0	0	0	0	0.723	0	0	0	0	0	0	0	0	0	0	0	0
mmu-mir-712_77_100_+	77	100	.............................................................................CGAGTCACCCCCGGGTGTTGCGA.........	23	CGAGTCACCCCCGGGTGTTGCGA	6	0.8189	0.00835612	0	0	0	0	0	0	0	0.0938	0	0	0	0	0	0	0	0	0	0	0	0	0	0	0	0	0	0	0	0	0	0	0	0	0	0	0	0	0	0	0	0	0
mmu-mir-712_79_97_+	79	97	...............................................................................AGTCACCCCCGGGTGTTG............	18	AGTCACCCCCGGGTGTTG	6	1.6628	0.0169673	0	0	0	0	0	0	0	0	0	0	0	0	0	0	0.9094	0	0	0	0	0	0	0	0	0	0	0	0	0	0	0	0	0	0	0	0	0	0	0	0	0	0
mmu-mir-712_80_99_+	80	99	................................................................................GTCACCCCCGGGTGTTGCG..........	19	GTCACCCCCGGGTGTTGCG	6	4.2627	0.0434969	0	0	0	0	0	0	0	0	0	0	0	0	0	0	0	0	0	3.0202	0	0.669	0	0	0	0	0	0	0	0	0	0	0	0	0	0	0	0	0	0	0	0	0
mmu-mir-712_86_108_+	86	108	......................................................................................CCCGGGTGTTGCGAGTTCGGGG.	22	CCCGGGTGTTGCGAGTTCGGGG	6	1.3496	0.0137714	0	0	0	0	0	0	0	0	0	0	0	0	0	0	0	0	0	0	0	0	0	0	0	0	0	0	0	0	0	0	0	0	0.3182	0	0	0	0	0	0	0	0
mmu-mir-712_87_106_+	87	106	.......................................................................................CCGGGTGTTGCGAGTTCGG...	19	CCGGGTGTTGCGAGTTCGG	6	0.8138	0.00830408	0	0	0	0	0	0	0	0	0	0	0	0	0	0	0	0	0	0	0	0	0	0	0	0	0	0	0	0	0	0	0	0	0	0	0	0	0	0	0	0	0
mmu-mir-712_88_108_+	88	108	........................................................................................CGGGTGTTGCGAGTTCGGGG.	20	CGGGTGTTGCGAGTTCGGGG	6	0.8006	0.00816939	0	0	0	0.0539	0	0	0	0	0	0	0	0	0	0	0	0	0	0	0	0	0	0	0	0	0	0	0	0	0	0	0	0	0	0	0	0	0	0	0	0	0
mmu-mir-712_1_19_+	1	19	.CTCCGCTTCTCCTTCACC..........................................................................................	18	CTCCGCTTCTCCTTCACC	5	0.241	0.00245918	0	0	0	0	0	0	0	0.0938	0.1472	0	0	0	0	0	0	0	0	0	0	0	0	0	0	0	0	0	0	0	0	0	0	0	0	0	0	0	0	0	0	0	0
mmu-mir-712_1_25_+	1	25	.CTCCGCTTCTCCTTCACCCGGGCG....................................................................................	24	CTCCGCTTCTCCTTCACCCGGGCG	5	0.621	0.00633673	0	0	0	0	0	0	0	0	0.1963	0	0	0	0	0	0	0	0	0	0	0	0	0	0	0	0	0	0	0	0	0	0	0	0	0	0	0	0	0	0	0	0
mmu-mir-712_2_20_+	2	20	..TCCGCTTCTCCTTCACCC.........................................................................................	18	TCCGCTTCTCCTTCACCC	5	0.2812	0.00286939	0	0	0	0	0	0	0.2812	0	0	0	0	0	0	0	0	0	0	0	0	0	0	0	0	0	0	0	0	0	0	0	0	0	0	0	0	0	0	0	0	0	0
mmu-mir-712_2_21_+	2	21	..TCCGCTTCTCCTTCACCCG........................................................................................	19	TCCGCTTCTCCTTCACCCG	5	0.4648	0.00474286	0	0	0	0	0	0	0.1687	0	0	0	0	0	0	0	0	0	0	0	0	0	0	0	0	0	0	0	0	0	0	0	0	0	0	0	0	0	0	0	0	0	0
mmu-mir-712_4_28_+	4	28	....CGCTTCTCCTTCACCCGGGCGGTA.................................................................................	24	CGCTTCTCCTTCACCCGGGCGGTA	5	1.4757	0.0150582	0	0	0	0	0	0	0	0	0	0	0	0	0	0	0	0	0	0	0	0	0	0	0	0	0	0	0	0	1.0845	0	0	0	0	0	0.2451	0	0	0	0	0	0
mmu-mir-712_4_32_+	4	32	....CGCTTCTCCTTCACCCGGGCGGTACCCG.............................................................................	28	CGCTTCTCCTTCACCCGGGCGGTACCCG	5	0.57	0.00581633	0	0	0	0.1616	0	0	0	0.0469	0	0	0	0	0	0	0	0	0	0	0	0	0	0	0	0	0	0	0	0	0.3615	0	0	0	0	0	0	0	0	0	0	0	0
mmu-mir-712_6_31_+	6	31	......CTTCTCCTTCACCCGGGCGGTACCC..............................................................................	25	CTTCTCCTTCACCCGGGCGGTACCC	5	0.2344	0.00239184	0	0	0	0	0	0	0	0.2344	0	0	0	0	0	0	0	0	0	0	0	0	0	0	0	0	0	0	0	0	0	0	0	0	0	0	0	0	0	0	0	0	0
mmu-mir-712_6_34_+	6	34	......CTTCTCCTTCACCCGGGCGGTACCCGCT...........................................................................	28	CTTCTCCTTCACCCGGGCGGTACCCGCT	5	0.2344	0.00239184	0	0	0	0	0	0	0	0.2344	0	0	0	0	0	0	0	0	0	0	0	0	0	0	0	0	0	0	0	0	0	0	0	0	0	0	0	0	0	0	0	0	0
mmu-mir-712_7_30_+	7	30	.......TTCTCCTTCACCCGGGCGGTACC...............................................................................	23	TTCTCCTTCACCCGGGCGGTACC	5	1.0144	0.010351	0	0	0.0617	0	0	0.0612	0	0	0	0	0	0	0	0	0	0	0	0	0	0	0	0	0	0	0	0	0	0	0.723	0	0	0	0	0	0	0	0	0	0	0	0
mmu-mir-712_7_31_+	7	31	.......TTCTCCTTCACCCGGGCGGTACCC..............................................................................	24	TTCTCCTTCACCCGGGCGGTACCC	5	0.2812	0.00286939	0	0	0	0	0	0	0.2812	0	0	0	0	0	0	0	0	0	0	0	0	0	0	0	0	0	0	0	0	0	0	0	0	0	0	0	0	0	0	0	0	0	0
mmu-mir-712_7_32_+	7	32	.......TTCTCCTTCACCCGGGCGGTACCCG.............................................................................	25	TTCTCCTTCACCCGGGCGGTACCCG	5	0.248	0.00253061	0	0	0	0.0539	0	0	0	0.0469	0.1472	0	0	0	0	0	0	0	0	0	0	0	0	0	0	0	0	0	0	0	0	0	0	0	0	0	0	0	0	0	0	0	0
mmu-mir-712_15_43_+	15	43	...............CACCCGGGCGGTACCCGCTCCGGCGCCG..................................................................	28	CACCCGGGCGGTACCCGCTCCGGCGCCG	5	0.2388	0.00243673	0	0	0	0	0	0	0	0.1406	0.0982	0	0	0	0	0	0	0	0	0	0	0	0	0	0	0	0	0	0	0	0	0	0	0	0	0	0	0	0	0	0	0	0
mmu-mir-712_18_45_+	18	45	..................CCGGGCGGTACCCGCTCCGGCGCCGGC................................................................	27	CCGGGCGGTACCCGCTCCGGCGCCGGC	5	0.2414	0.00246327	0	0	0	0.0539	0	0	0	0.1875	0	0	0	0	0	0	0	0	0	0	0	0	0	0	0	0	0	0	0	0	0	0	0	0	0	0	0	0	0	0	0	0	0
mmu-mir-712_23_48_+	23	48	.......................CGGTACCCGCTCCGGCGCCGGCCCG.............................................................	25	CGGTACCCGCTCCGGCGCCGGCCCG	5	0.2344	0.00239184	0	0	0	0	0	0	0	0.2344	0	0	0	0	0	0	0	0	0	0	0	0	0	0	0	0	0	0	0	0	0	0	0	0	0	0	0	0	0	0	0	0	0
mmu-mir-712_30_59_+	30	59	..............................CGCTCCGGCGCCGGCCCGCGGGACGCCGC..................................................	29	CGCTCCGGCGCCGGCCCGCGGGACGCCGC	5	0.2961	0.00302143	0	0.0494	0.2467	0	0	0	0	0	0	0	0	0	0	0	0	0	0	0	0	0	0	0	0	0	0	0	0	0	0	0	0	0	0	0	0	0	0	0	0	0	0
mmu-mir-712_32_57_+	32	57	................................CTCCGGCGCCGGCCCGCGGGACGCC....................................................	25	CTCCGGCGCCGGCCCGCGGGACGCC	5	0.3084	0.00314694	0	0	0.3084	0	0	0	0	0	0	0	0	0	0	0	0	0	0	0	0	0	0	0	0	0	0	0	0	0	0	0	0	0	0	0	0	0	0	0	0	0	0
mmu-mir-712_34_52_+	34	52	..................................CCGGCGCCGGCCCGCGGG.........................................................	18	CCGGCGCCGGCCCGCGGG	5	0.7328	0.00747755	0	0	0	0	0	0	0	0.1406	0	0	0	0	0	0	0	0	0	0	0	0	0	0	0	0	0	0	0	0	0	0	0	0	0	0	0	0	0	0	0	0	0
mmu-mir-712_35_65_+	35	65	...................................CGGCGCCGGCCCGCGGGACGCCGCGGCGTC............................................	30	CGGCGCCGGCCCGCGGGACGCCGCGGCGTC	5	0.242	0.00246939	0	0.1482	0	0	0	0	0	0.0938	0	0	0	0	0	0	0	0	0	0	0	0	0	0	0	0	0	0	0	0	0	0	0	0	0	0	0	0	0	0	0	0	0
mmu-mir-712_38_56_+	38	56	......................................CGCCGGCCCGCGGGACGC.....................................................	18	CGCCGGCCCGCGGGACGC	5	1.3357	0.0136296	0	0	0	0	0	0	0	0	0.0491	0	0	0	0	0	0	0	0	0	0	0	0	0	0	0	0	0	0	0	0	0	0	0	0	0	0	0	0	0	0	0	0
mmu-mir-712_40_68_+	40	68	........................................CCGGCCCGCGGGACGCCGCGGCGTCCGT.........................................	28	CCGGCCCGCGGGACGCCGCGGCGTCCGT	5	0.3033	0.0030949	0.3033	0	0	0	0	0	0	0	0	0	0	0	0	0	0	0	0	0	0	0	0	0	0	0	0	0	0	0	0	0	0	0	0	0	0	0	0	0	0	0	0
mmu-mir-712_43_63_+	43	63	...........................................GCCCGCGGGACGCCGCGGCG..............................................	20	GCCCGCGGGACGCCGCGGCG	5	0.8561	0.00873571	0	0	0	0	0	0	0	0	0	0	0	0	0	0	0	0	0	0	0	0	0	0	0	0	0	0	0	0	0	0	0	0	0	0	0	0	0	0	0	0	0
mmu-mir-712_46_70_+	46	70	..............................................CGCGGGACGCCGCGGCGTCCGTGC.......................................	24	CGCGGGACGCCGCGGCGTCCGTGC	5	7.1289	0.0727439	0	0	0	0	0	0	0	0	0	0	0	0	0	0	0	0	0	0	0.7244	1.338	0	0	0	0.7304	4.3361	0	0	0	0	0	0	0	0	0	0	0	0	0	0	0	0
mmu-mir-712_63_81_+	63	81	...............................................................TCCGTGCGCCGATGCGAG............................	18	TCCGTGCGCCGATGCGAG	5	0.5472	0.00558367	0	0	0	0	0	0	0	0	0	0	0	0	0	0	0	0	0	0	0	0	0	0	0	0	0	0	0	0	0	0	0	0	0	0	0	0	0	0	0	0	0
mmu-mir-712_63_82_+	63	82	...............................................................TCCGTGCGCCGATGCGAGT...........................	19	TCCGTGCGCCGATGCGAGT	5	0.3647	0.00372143	0	0	0.185	0	0	0	0	0	0	0	0	0	0	0	0	0	0	0	0	0	0	0	0	0	0	0	0	0	0	0	0	0	0	0	0	0	0	0	0	0	0
mmu-mir-712_64_83_+	64	83	................................................................CCGTGCGCCGATGCGAGTC..........................	19	CCGTGCGCCGATGCGAGTC	5	0.3444	0.00351429	0	0	0	0	0	0	0	0	0.1963	0	0	0	0	0	0	0	0	0	0	0	0	0	0	0	0	0	0	0	0	0	0	0	0	0	0	0	0	0	0	0	0
mmu-mir-712_73_94_+	73	94	.........................................................................GATGCGAGTCACCCCCGGGTG...............	21	GATGCGAGTCACCCCCGGGTG	5	0.3806	0.00388367	0	0	0	0	0	0	0	0.1406	0	0	0	0	0	0	0	0	0	0	0	0	0	0	0	0	0	0	0	0	0	0	0	0	0	0	0	0	0	0	0	0	0
mmu-mir-712_75_97_+	75	97	...........................................................................TGCGAGTCACCCCCGGGTGTTG............	22	TGCGAGTCACCCCCGGGTGTTG	5	0.751	0.00766327	0	0	0	0	0	0	0	0	0	0	0	0	0	0	0	0	0	0	0	0	0	0	0	0	0	0	0	0	0.3615	0	0	0	0	0	0	0	0	0	0	0	0
mmu-mir-712_79_101_+	79	101	...............................................................................AGTCACCCCCGGGTGTTGCGAG........	22	AGTCACCCCCGGGTGTTGCGAG	5	1.0118	0.0103245	0	0	0	0	0	0	0	0	0	0	0	0	0	0	0	0	0	0	0	0	0	0	0	0	0	0	0	0	0.723	0	0	0	0	0	0	0	0	0	0	0	0
mmu-mir-712_81_99_+	81	99	.................................................................................TCACCCCCGGGTGTTGCG..........	18	TCACCCCCGGGTGTTGCG	5	8.8571	0.0903786	0	0	0	0	0	0	0	0	0	0	0	0	0	0	0	0	0	0	0	0	0	2.7456	0.8775	0.7304	4.3361	0	0	0	0	0	0	0	0	0	0	0	0	0	0	0	0
mmu-mir-712_81_108_+	81	108	.................................................................................TCACCCCCGGGTGTTGCGAGTTCGGGG.	27	TCACCCCCGGGTGTTGCGAGTTCGGGG	5	1.6145	0.0164745	0	0	0	0	0	0	0	0	0	0	0	0	0	0	0	0	0	0	0	0	0	0	0	0	0	0	0	0	1.446	0	0	0	0	0	0	0	0	0	0	0	0
mmu-mir-712_83_104_+	83	104	...................................................................................ACCCCCGGGTGTTGCGAGTTC.....	21	ACCCCCGGGTGTTGCGAGTTC	5	0.6931	0.00707245	0	0	0	0.1077	0.0469	0	0	0	0	0	0	0	0	0	0	0	0	0	0	0	0	0	0	0	0	0	0	0	0	0	0	0	0	0	0	0	0	0	0	0	0
mmu-mir-712_83_106_+	83	106	...................................................................................ACCCCCGGGTGTTGCGAGTTCGG...	23	ACCCCCGGGTGTTGCGAGTTCGG	5	0.5246	0.00535306	0	0	0	0	0	0	0	0.0469	0	0	0	0	0	0	0	0	0	0	0	0	0	0	0	0	0	0	0	0	0	0	0	0	0	0	0	0	0	0	0	0	0
mmu-mir-712_84_106_+	84	106	....................................................................................CCCCCGGGTGTTGCGAGTTCGG...	22	CCCCCGGGTGTTGCGAGTTCGG	5	1.2244	0.0124939	0	0	0	0	0	0	0	0	0	0	0	0	0	0	0	0	0	0	0	0	0	0	0	0	0	0	0	0	0.3615	0	0	0	0	0	0	0	0	0	0	0	0
mmu-mir-712_2_22_+	2	22	..TCCGCTTCTCCTTCACCCGG.......................................................................................	20	TCCGCTTCTCCTTCACCCGG	4	0.2015	0.00205612	0	0	0	0.1077	0.0938	0	0	0	0	0	0	0	0	0	0	0	0	0	0	0	0	0	0	0	0	0	0	0	0	0	0	0	0	0	0	0	0	0	0	0	0
mmu-mir-712_2_24_+	2	24	..TCCGCTTCTCCTTCACCCGGGC.....................................................................................	22	TCCGCTTCTCCTTCACCCGGGC	4	0.7637	0.00779286	0	0	0	0	0	0	0	0.0469	0	0	0	0	0	0	0	0	0	0	0	0	0	0	0	0	0	0	0	0	0	0	0	0	0	0	0	0	0	0	0	0	0
mmu-mir-712_4_31_+	4	31	....CGCTTCTCCTTCACCCGGGCGGTACCC..............................................................................	27	CGCTTCTCCTTCACCCGGGCGGTACCC	4	0.3281	0.00334796	0.182	0	0	0	0	0	0	0	0	0	0	0	0	0	0	0	0	0	0	0	0	0	0	0	0	0	0	0	0	0	0	0	0	0	0	0	0	0	0	0	0
mmu-mir-712_7_25_+	7	25	.......TTCTCCTTCACCCGGGCG....................................................................................	18	TTCTCCTTCACCCGGGCG	4	0.8471	0.00864388	0	0	0	0	0	0	0	0	0.1472	0	0	0.6999	0	0	0	0	0	0	0	0	0	0	0	0	0	0	0	0	0	0	0	0	0	0	0	0	0	0	0	0	0
mmu-mir-712_7_34_+	7	34	.......TTCTCCTTCACCCGGGCGGTACCCGCT...........................................................................	27	TTCTCCTTCACCCGGGCGGTACCCGCT	4	0.3091	0.00315408	0	0	0	0	0	0	0	0.1406	0	0	0	0	0	0	0	0	0	0	0	0	0	0	0	0	0	0	0	0	0	0	0	0	0	0	0	0	0	0	0	0	0
mmu-mir-712_10_36_+	10	36	..........TCCTTCACCCGGGCGGTACCCGCTCC.........................................................................	26	TCCTTCACCCGGGCGGTACCCGCTCC	4	0.4228	0.00431429	0	0	0	0	0	0	0	0	0	0	0	0	0	0	0	0	0	0	0	0	0	0	0	0	0	0	0	0	0	0	0	0	0	0	0	0	0	0	0	0	0
mmu-mir-712_11_31_+	11	31	...........CCTTCACCCGGGCGGTACCC..............................................................................	20	CCTTCACCCGGGCGGTACCC	4	0.2158	0.00220204	0	0	0	0.1077	0.0469	0.0612	0	0	0	0	0	0	0	0	0	0	0	0	0	0	0	0	0	0	0	0	0	0	0	0	0	0	0	0	0	0	0	0	0	0	0
mmu-mir-712_13_42_+	13	42	.............TTCACCCGGGCGGTACCCGCTCCGGCGCC...................................................................	29	TTCACCCGGGCGGTACCCGCTCCGGCGCC	4	0.1976	0.00201633	0	0.1976	0	0	0	0	0	0	0	0	0	0	0	0	0	0	0	0	0	0	0	0	0	0	0	0	0	0	0	0	0	0	0	0	0	0	0	0	0	0	0
mmu-mir-712_14_42_+	14	42	..............TCACCCGGGCGGTACCCGCTCCGGCGCC...................................................................	28	TCACCCGGGCGGTACCCGCTCCGGCGCC	4	0.3812	0.0038898	0	0	0	0	0	0	0	0	0	0	0	0	0	0	0	0	0	0	0	0	0	0	0	0	0	0	0	0	0	0	0	0	0	0	0	0	0	0	0	0	0
mmu-mir-712_15_44_+	15	44	...............CACCCGGGCGGTACCCGCTCCGGCGCCGG.................................................................	29	CACCCGGGCGGTACCCGCTCCGGCGCCGG	4	0.649	0.00662245	0	0	0	0	0	0	0	0	0	0	0	0	0	0	0	0	0	0	0	0	0	0	0	0	0	0	0	0	0	0	0	0	0	0	0	0	0	0	0	0	0
mmu-mir-712_16_37_+	16	37	................ACCCGGGCGGTACCCGCTCCG........................................................................	21	ACCCGGGCGGTACCCGCTCCG	4	0.8221	0.00838878	0	0	0	0	0	0	0	0	0	0	0	0	0	0	0	0	0	0	0	0	0	0	0	0	0	0	0	0	0	0	0	0	0	0.1894	0	0	0	0	0	0	0
mmu-mir-712_17_43_+	17	43	.................CCCGGGCGGTACCCGCTCCGGCGCCG..................................................................	26	CCCGGGCGGTACCCGCTCCGGCGCCG	4	0.3796	0.00387347	0	0	0	0	0	0.0612	0	0.0469	0	0	0	0	0	0	0	0	0	0	0	0	0	0	0	0	0	0	0	0	0	0	0	0	0	0	0	0	0	0	0	0	0
mmu-mir-712_17_47_+	17	47	.................CCCGGGCGGTACCCGCTCCGGCGCCGGCCC..............................................................	30	CCCGGGCGGTACCCGCTCCGGCGCCGGCCC	4	0.2011	0.00205204	0	0	0	0.0539	0	0	0	0	0.1472	0	0	0	0	0	0	0	0	0	0	0	0	0	0	0	0	0	0	0	0	0	0	0	0	0	0	0	0	0	0	0	0
mmu-mir-712_20_46_+	20	46	....................GGGCGGTACCCGCTCCGGCGCCGGCC...............................................................	26	GGGCGGTACCCGCTCCGGCGCCGGCC	4	0.1963	0.00200306	0	0	0	0	0	0	0	0	0.1963	0	0	0	0	0	0	0	0	0	0	0	0	0	0	0	0	0	0	0	0	0	0	0	0	0	0	0	0	0	0	0	0
mmu-mir-712_23_47_+	23	47	.......................CGGTACCCGCTCCGGCGCCGGCCC..............................................................	24	CGGTACCCGCTCCGGCGCCGGCCC	4	0.2341	0.00238878	0	0	0.185	0	0	0	0	0	0.0491	0	0	0	0	0	0	0	0	0	0	0	0	0	0	0	0	0	0	0	0	0	0	0	0	0	0	0	0	0	0	0	0
mmu-mir-712_24_50_+	24	50	........................GGTACCCGCTCCGGCGCCGGCCCGCG...........................................................	26	GGTACCCGCTCCGGCGCCGGCCCGCG	4	0.1875	0.00191327	0	0	0	0	0.0469	0	0	0.1406	0	0	0	0	0	0	0	0	0	0	0	0	0	0	0	0	0	0	0	0	0	0	0	0	0	0	0	0	0	0	0	0	0
mmu-mir-712_25_46_+	25	46	.........................GTACCCGCTCCGGCGCCGGCC...............................................................	21	GTACCCGCTCCGGCGCCGGCC	4	0.6681	0.00681735	0	0.0988	0	0	0	0	0	0	0	0	0	0	0	0	0	0	0	0	0	0	0	0	0	0	0	0	0	0	0	0	0	0	0	0	0	0	0	0	0	0	0
mmu-mir-712_26_51_+	26	51	..........................TACCCGCTCCGGCGCCGGCCCGCGG..........................................................	25	TACCCGCTCCGGCGCCGGCCCGCGG	4	1.2087	0.0123337	0	0.0494	0	0	0	0	0	0.0469	0	0	0	0	0	0	0	0	0	0	0	0	0	0	0	0	0	0	0	0	0.3615	0	0	0	0	0	0	0	0	0	0	0	0
mmu-mir-712_28_49_+	28	49	............................CCCGCTCCGGCGCCGGCCCGC............................................................	21	CCCGCTCCGGCGCCGGCCCGC	4	0.8327	0.00849694	0	0	0	0	0	0	0	0	0	0	0	0	0	0	0	0	0	0	0	0	0	0	0	0	0	0	0	0	0	0	0	0	0	0	0	0	0	0	0	0	0
mmu-mir-712_28_50_+	28	50	............................CCCGCTCCGGCGCCGGCCCGCG...........................................................	22	CCCGCTCCGGCGCCGGCCCGCG	4	0.677	0.00690816	0	0	0	0	0	0	0	0	0	0	0	0	0	0	0	0	0	0	0	0	0	0	0	0	0	0	0	0	0	0	0	0	0	0	0	0	0	0	0	0	0
mmu-mir-712_29_55_+	29	55	.............................CCGCTCCGGCGCCGGCCCGCGGGACG......................................................	26	CCGCTCCGGCGCCGGCCCGCGGGACG	4	0.2846	0.00290408	0	0.0988	0	0	0	0	0	0	0	0	0	0	0	0	0	0	0	0	0	0	0	0	0	0	0	0	0	0	0	0	0	0	0	0	0	0	0	0	0	0	0
mmu-mir-712_30_58_+	30	58	..............................CGCTCCGGCGCCGGCCCGCGGGACGCCG...................................................	28	CGCTCCGGCGCCGGCCCGCGGGACGCCG	4	0.5091	0.0051949	0	0.0494	0	0	0	0	0	0	0.0982	0	0	0	0	0	0	0	0	0	0	0	0	0	0	0	0	0	0	0	0.3615	0	0	0	0	0	0	0	0	0	0	0	0
mmu-mir-712_32_52_+	32	52	................................CTCCGGCGCCGGCCCGCGGG.........................................................	20	CTCCGGCGCCGGCCCGCGGG	4	0.946	0.00965306	0	0	0	0	0	0	0	0.0469	0	0	0	0	0	0	0	0	0	0	0	0	0	0	0	0	0	0	0	0	0.3615	0	0	0	0	0	0	0	0	0	0	0	0.3895
mmu-mir-712_33_51_+	33	51	.................................TCCGGCGCCGGCCCGCGG..........................................................	18	TCCGGCGCCGGCCCGCGG	4	0.8066	0.00823061	0	0	0	0	0	0	0	0.0469	0	0	0	0	0	0	0	0	0	0	0	0	0	0	0	0	0	0	0	0	0	0	0	0	0	0	0	0	0	0	0	0	0
mmu-mir-712_37_59_+	37	59	.....................................GCGCCGGCCCGCGGGACGCCGC..................................................	22	GCGCCGGCCCGCGGGACGCCGC	4	0.8529	0.00870306	0	0	0	0	0	0	0	0	0	0	0	0	0	0	0	0	0	0	0	0	0	0	0	0	0	0	0	0	0	0	0	0	0	0	0	0	0	0	0	0	0
mmu-mir-712_38_64_+	38	64	......................................CGCCGGCCCGCGGGACGCCGCGGCGT.............................................	26	CGCCGGCCCGCGGGACGCCGCGGCGT	4	0.2426	0.00247551	0.2426	0	0	0	0	0	0	0	0	0	0	0	0	0	0	0	0	0	0	0	0	0	0	0	0	0	0	0	0	0	0	0	0	0	0	0	0	0	0	0	0
mmu-mir-712_41_69_+	41	69	.........................................CGGCCCGCGGGACGCCGCGGCGTCCGTG........................................	28	CGGCCCGCGGGACGCCGCGGCGTCCGTG	4	0.2467	0.00251735	0	0	0.2467	0	0	0	0	0	0	0	0	0	0	0	0	0	0	0	0	0	0	0	0	0	0	0	0	0	0	0	0	0	0	0	0	0	0	0	0	0	0
mmu-mir-712_41_71_+	41	71	.........................................CGGCCCGCGGGACGCCGCGGCGTCCGTGCG......................................	30	CGGCCCGCGGGACGCCGCGGCGTCCGTGCG	4	0.2467	0.00251735	0	0	0.2467	0	0	0	0	0	0	0	0	0	0	0	0	0	0	0	0	0	0	0	0	0	0	0	0	0	0	0	0	0	0	0	0	0	0	0	0	0	0
mmu-mir-712_42_61_+	42	61	..........................................GGCCCGCGGGACGCCGCGG................................................	19	GGCCCGCGGGACGCCGCGG	4	0.2426	0.00247551	0.2426	0	0	0	0	0	0	0	0	0	0	0	0	0	0	0	0	0	0	0	0	0	0	0	0	0	0	0	0	0	0	0	0	0	0	0	0	0	0	0	0
mmu-mir-712_42_63_+	42	63	..........................................GGCCCGCGGGACGCCGCGGCG..............................................	21	GGCCCGCGGGACGCCGCGGCG	4	1.2151	0.012399	0	0	0	0	0	0	0	0	0	0	0	0	0	0	0	0	0	0	0	0	0	0	0	0	0	0	0	0	0	0	0	0	0	0	0	0	0	0	0	0	0
mmu-mir-712_44_63_+	44	63	............................................CCCGCGGGACGCCGCGGCG..............................................	19	CCCGCGGGACGCCGCGGCG	4	0.4428	0.00451837	0	0	0	0	0	0	0	0.0938	0	0	0	0	0	0	0	0	0	0	0	0	0	0	0	0	0	0	0	0	0	0	0	0	0	0	0	0	0	0	0	0	0
mmu-mir-712_46_71_+	46	71	..............................................CGCGGGACGCCGCGGCGTCCGTGCG......................................	25	CGCGGGACGCCGCGGCGTCCGTGCG	4	2.0941	0.0213684	0	0	0	0	0	0	0	0	0	0	0	0	0	0	0	0	0	0	0.7244	0	0	0	0.8775	0	0	0	0	0	0	0	0	0	0	0	0	0	0	0	0	0	0
mmu-mir-712_50_79_+	50	79	..................................................GGACGCCGCGGCGTCCGTGCGCCGATGCG..............................	29	GGACGCCGCGGCGTCCGTGCGCCGATGCG	4	0.1875	0.00191327	0	0	0	0	0	0	0	0.1875	0	0	0	0	0	0	0	0	0	0	0	0	0	0	0	0	0	0	0	0	0	0	0	0	0	0	0	0	0	0	0	0	0
mmu-mir-712_51_76_+	51	76	...................................................GACGCCGCGGCGTCCGTGCGCCGAT.................................	25	GACGCCGCGGCGTCCGTGCGCCGAT	4	3.3747	0.0344357	0	0	0	0	0	0	0	0	0	0	0	0	0	0	0	0	0	3.0202	0	0	0	0	0	0	0	0	0	0	0	0	0	0	0	0	0	0	0	0	0	0	0
mmu-mir-712_52_72_+	52	72	....................................................ACGCCGCGGCGTCCGTGCGC.....................................	20	ACGCCGCGGCGTCCGTGCGC	4	4.7635	0.0486071	0	0	0	0	0	0	0	0	0	0	0	0	0	0	0	0	0	0	0	0	0	0	0	0	4.3361	0	0	0	0	0	0	0	0	0	0	0	0	0	0	0	0
mmu-mir-712_52_74_+	52	74	....................................................ACGCCGCGGCGTCCGTGCGCCG...................................	22	ACGCCGCGGCGTCCGTGCGCCG	4	0.2794	0.00285102	0	0	0	0	0	0	0	0	0	0	0	0	0	0	0	0	0	0	0	0	0	0	0	0	0	0	0	0	0	0	0	0	0	0	0	0	0	0	0	0	0
mmu-mir-712_54_77_+	54	77	......................................................GCCGCGGCGTCCGTGCGCCGATG................................	23	GCCGCGGCGTCCGTGCGCCGATG	4	0.3703	0.00377857	0	0.0988	0	0	0	0	0	0	0	0	0	0	0	0	0	0	0	0	0	0	0	0	0	0	0	0	0	0	0	0	0	0	0	0	0	0	0	0	0	0	0
mmu-mir-712_72_90_+	72	90	........................................................................CGATGCGAGTCACCCCCG...................	18	CGATGCGAGTCACCCCCG	4	0.1875	0.00191327	0	0	0	0	0	0	0	0.1875	0	0	0	0	0	0	0	0	0	0	0	0	0	0	0	0	0	0	0	0	0	0	0	0	0	0	0	0	0	0	0	0	0
mmu-mir-712_74_96_+	74	96	..........................................................................ATGCGAGTCACCCCCGGGTGTT.............	22	ATGCGAGTCACCCCCGGGTGTT	4	0.3231	0.00329694	0	0	0	0	0	0	0	0.0469	0	0	0	0	0	0	0	0	0	0	0	0	0	0	0	0	0	0	0	0	0	0	0	0	0	0	0	0	0	0	0	0	0
mmu-mir-712_76_106_+	76	106	............................................................................GCGAGTCACCCCCGGGTGTTGCGAGTTCGG...	30	GCGAGTCACCCCCGGGTGTTGCGAGTTCGG	4	0.6909	0.00705	0	0	0	0	0	0	0	0	0	0	0	0	0	0	0	0	0	0	0	0	0	0	0	0	0	0	0	0	0	0	0	0	0	0	0	0	0	0	0	0	0
mmu-mir-712_77_107_+	77	107	.............................................................................CGAGTCACCCCCGGGTGTTGCGAGTTCGGG..	30	CGAGTCACCCCCGGGTGTTGCGAGTTCGGG	4	0.2933	0.00299286	0	0	0	0	0	0	0	0	0.1472	0	0	0	0	0	0	0	0	0	0	0	0	0	0	0	0	0	0	0	0	0	0	0	0	0	0	0	0	0	0	0	0
mmu-mir-712_78_106_+	78	106	..............................................................................GAGTCACCCCCGGGTGTTGCGAGTTCGG...	28	GAGTCACCCCCGGGTGTTGCGAGTTCGG	4	0.6589	0.00672347	0	0	0	0	0	0	0	0	0	0	0	0	0	0	0	0	0	0	0	0	0	0	0	0	0	0	0	0	0	0	0	0	0	0	0	0	0	0	0	0	0
mmu-mir-712_81_103_+	81	103	.................................................................................TCACCCCCGGGTGTTGCGAGTT......	22	TCACCCCCGGGTGTTGCGAGTT	4	0.6666	0.00680204	0	0	0	0	0	0	0	0.0469	0	0	0	0	0	0	0	0	0	0	0	0	0	0	0	0	0	0	0	0	0.3615	0	0	0	0	0	0	0	0	0	0	0	0
mmu-mir-712_85_105_+	85	105	.....................................................................................CCCCGGGTGTTGCGAGTTCG....	20	CCCCGGGTGTTGCGAGTTCG	4	1.0282	0.0104918	0	0	0	0	0	0	0	0	0	0	0	0	0	0	0	0	0	0	0	0	0	0	0	0	0	0	0	0	0.3615	0	0	0	0	0	0	0	0	0	0	0	0.3895
mmu-mir-712_86_106_+	86	106	......................................................................................CCCGGGTGTTGCGAGTTCGG...	20	CCCGGGTGTTGCGAGTTCGG	4	1.0646	0.0108633	0	0	0	0	0	0	0	0	0	0	0	0	0	0	0	0	0	0	0	0.669	0	0	0	0	0	0	0	0	0	0	0	0	0	0	0	0	0	0	0	0	0
mmu-mir-712_89_109_+	89	109	.........................................................................................GGGTGTTGCGAGTTCGGGGA	20	GGGTGTTGCGAGTTCGGGGA	4	0.5142	0.00524694	0	0	0	0	0	0	0	0	0	0	0	0	0	0	0	0	0	0	0	0	0	0	0	0	0	0	0	0	0	0	0	0	0	0	0	0	0	0	0	0	0
mmu-mir-712_0_20_+	0	20	TCTCCGCTTCTCCTTCACCC.........................................................................................	20	TCTCCGCTTCTCCTTCACCC	3	0.2419	0.00246837	0	0	0	0	0	0	0	0.0938	0	0	0	0	0	0	0	0	0	0	0	0	0	0	0	0	0	0	0	0	0	0	0	0	0	0	0	0	0	0	0	0	0
mmu-mir-712_3_24_+	3	24	...CCGCTTCTCCTTCACCCGGGC.....................................................................................	21	CCGCTTCTCCTTCACCCGGGC	3	0.5229	0.00533571	0	0	0	0	0	0	0	0	0.0982	0	0	0	0	0	0	0	0	0	0	0	0	0	0	0	0	0	0	0	0	0	0	0	0	0	0	0	0	0	0	0	0
mmu-mir-712_4_30_+	4	30	....CGCTTCTCCTTCACCCGGGCGGTACC...............................................................................	26	CGCTTCTCCTTCACCCGGGCGGTACC	3	0.4575	0.00466837	0	0	0	0	0	0	0	0.0469	0.0491	0	0	0	0	0	0	0	0	0	0	0	0	0	0	0	0	0	0	0	0.3615	0	0	0	0	0	0	0	0	0	0	0	0
mmu-mir-712_4_33_+	4	33	....CGCTTCTCCTTCACCCGGGCGGTACCCGC............................................................................	29	CGCTTCTCCTTCACCCGGGCGGTACCCGC	3	0.1406	0.00143469	0	0	0	0	0	0	0	0.1406	0	0	0	0	0	0	0	0	0	0	0	0	0	0	0	0	0	0	0	0	0	0	0	0	0	0	0	0	0	0	0	0	0
mmu-mir-712_5_26_+	5	26	.....GCTTCTCCTTCACCCGGGCGG...................................................................................	21	GCTTCTCCTTCACCCGGGCGG	3	0.3913	0.00399286	0	0	0	0	0	0	0	0.0469	0	0	0	0	0	0	0	0	0	0	0	0	0	0	0	0	0	0	0	0	0	0	0	0	0	0	0	0	0	0	0	0	0
mmu-mir-712_5_28_+	5	28	.....GCTTCTCCTTCACCCGGGCGGTA.................................................................................	23	GCTTCTCCTTCACCCGGGCGGTA	3	0.8915	0.00909694	0	0	0	0	0	0	0	0	0	0	0	0	0	0	0	0	0	0	0	0	0	0	0	0	0	0	0	0	0.723	0	0	0	0	0	0	0	0	0	0	0	0
mmu-mir-712_6_24_+	6	24	......CTTCTCCTTCACCCGGGC.....................................................................................	18	CTTCTCCTTCACCCGGGC	3	0.1594	0.00162653	0	0	0	0	0	0	0.1125	0.0469	0	0	0	0	0	0	0	0	0	0	0	0	0	0	0	0	0	0	0	0	0	0	0	0	0	0	0	0	0	0	0	0	0
mmu-mir-712_9_39_+	9	39	.........CTCCTTCACCCGGGCGGTACCCGCTCCGGC......................................................................	30	CTCCTTCACCCGGGCGGTACCCGCTCCGGC	3	0.1482	0.00151224	0	0.1482	0	0	0	0	0	0	0	0	0	0	0	0	0	0	0	0	0	0	0	0	0	0	0	0	0	0	0	0	0	0	0	0	0	0	0	0	0	0	0
mmu-mir-712_10_35_+	10	35	..........TCCTTCACCCGGGCGGTACCCGCTC..........................................................................	25	TCCTTCACCCGGGCGGTACCCGCTC	3	1.2739	0.012999	0	0	0	0	0	0	0	0	0	0	0	0	0	0	0	0	0	0	0	0	0	0	0	0	0	0	0	0	0	0	0	0	0	0	0	0	0	0	0	0	0
mmu-mir-712_13_37_+	13	37	.............TTCACCCGGGCGGTACCCGCTCCG........................................................................	24	TTCACCCGGGCGGTACCCGCTCCG	3	0.1472	0.00150204	0	0	0	0	0	0	0	0	0.1472	0	0	0	0	0	0	0	0	0	0	0	0	0	0	0	0	0	0	0	0	0	0	0	0	0	0	0	0	0	0	0	0
mmu-mir-712_14_40_+	14	40	..............TCACCCGGGCGGTACCCGCTCCGGCG.....................................................................	26	TCACCCGGGCGGTACCCGCTCCGGCG	3	0.5841	0.0059602	0	0	0	0	0	0	0	0	0	0	0	0	0	0	0	0	0	0	0	0	0	0	0	0	0	0	0	0	0	0	0	0	0	0	0	0	0	0	0	0	0
mmu-mir-712_15_40_+	15	40	...............CACCCGGGCGGTACCCGCTCCGGCG.....................................................................	25	CACCCGGGCGGTACCCGCTCCGGCG	3	0.6962	0.00710408	0	0	0	0	0	0	0	0	0	0	0	0	0	0	0	0	0	0	0	0	0	0	0	0	0	0	0	0	0	0	0	0	0	0	0	0	0	0	0	0	0
mmu-mir-712_17_42_+	17	42	.................CCCGGGCGGTACCCGCTCCGGCGCC...................................................................	25	CCCGGGCGGTACCCGCTCCGGCGCC	3	0.5185	0.00529082	0	0	0	0	0.0938	0	0	0	0	0	0	0	0	0	0	0	0	0	0	0	0	0	0	0	0	0	0	0	0	0	0	0	0	0	0	0	0	0	0	0	0
mmu-mir-712_18_39_+	18	39	..................CCGGGCGGTACCCGCTCCGGC......................................................................	21	CCGGGCGGTACCCGCTCCGGC	3	0.5024	0.00512653	0	0	0	0	0	0	0	0	0	0	0	0	0	0	0	0	0	0	0	0	0	0	0	0	0	0	0	0	0	0	0	0	0	0	0	0	0	0	0	0	0
mmu-mir-712_18_47_+	18	47	..................CCGGGCGGTACCCGCTCCGGCGCCGGCCC..............................................................	29	CCGGGCGGTACCCGCTCCGGCGCCGGCCC	3	0.1567	0.00159898	0.0607	0	0	0	0	0	0	0.0469	0.0491	0	0	0	0	0	0	0	0	0	0	0	0	0	0	0	0	0	0	0	0	0	0	0	0	0	0	0	0	0	0	0	0
mmu-mir-712_18_48_+	18	48	..................CCGGGCGGTACCCGCTCCGGCGCCGGCCCG.............................................................	30	CCGGGCGGTACCCGCTCCGGCGCCGGCCCG	3	0.1567	0.00159898	0.0607	0	0	0	0	0	0	0.0469	0.0491	0	0	0	0	0	0	0	0	0	0	0	0	0	0	0	0	0	0	0	0	0	0	0	0	0	0	0	0	0	0	0	0
mmu-mir-712_19_48_+	19	48	...................CGGGCGGTACCCGCTCCGGCGCCGGCCCG.............................................................	29	CGGGCGGTACCCGCTCCGGCGCCGGCCCG	3	0.1472	0.00150204	0	0	0	0	0	0	0	0	0.1472	0	0	0	0	0	0	0	0	0	0	0	0	0	0	0	0	0	0	0	0	0	0	0	0	0	0	0	0	0	0	0	0
mmu-mir-712_21_46_+	21	46	.....................GGCGGTACCCGCTCCGGCGCCGGCC...............................................................	25	GGCGGTACCCGCTCCGGCGCCGGCC	3	0.1407	0.00143571	0	0	0	0	0.1407	0	0	0	0	0	0	0	0	0	0	0	0	0	0	0	0	0	0	0	0	0	0	0	0	0	0	0	0	0	0	0	0	0	0	0	0
mmu-mir-712_22_42_+	22	42	......................GCGGTACCCGCTCCGGCGCC...................................................................	20	GCGGTACCCGCTCCGGCGCC	3	0.5324	0.00543265	0	0	0	0.1077	0	0	0	0	0	0	0	0	0	0	0	0	0	0	0	0	0	0	0	0	0	0	0	0	0	0	0	0	0	0	0	0	0	0	0	0	0
mmu-mir-712_22_43_+	22	43	......................GCGGTACCCGCTCCGGCGCCG..................................................................	21	GCGGTACCCGCTCCGGCGCCG	3	1.381	0.0140918	0	0	0	0	0.0469	0	0	0	0	0	0	0	0	0	0.9094	0	0	0	0	0	0	0	0	0	0	0	0	0	0	0	0	0	0	0	0	0	0	0	0	0	0
mmu-mir-712_22_51_+	22	51	......................GCGGTACCCGCTCCGGCGCCGGCCCGCGG..........................................................	29	GCGGTACCCGCTCCGGCGCCGGCCCGCGG	3	0.1472	0.00150204	0	0	0	0	0	0	0	0	0.1472	0	0	0	0	0	0	0	0	0	0	0	0	0	0	0	0	0	0	0	0	0	0	0	0	0	0	0	0	0	0	0	0
mmu-mir-712_23_43_+	23	43	.......................CGGTACCCGCTCCGGCGCCG..................................................................	20	CGGTACCCGCTCCGGCGCCG	3	0.1407	0.00143571	0	0	0	0	0.1407	0	0	0	0	0	0	0	0	0	0	0	0	0	0	0	0	0	0	0	0	0	0	0	0	0	0	0	0	0	0	0	0	0	0	0	0
mmu-mir-712_23_45_+	23	45	.......................CGGTACCCGCTCCGGCGCCGGC................................................................	22	CGGTACCCGCTCCGGCGCCGGC	3	0.6393	0.00652347	0	0	0	0	0	0	0	0	0	0	0	0	0	0	0	0	0	0	0	0	0	0	0	0	0	0	0	0	0	0	0	0	0	0	0	0	0	0	0	0	0
mmu-mir-712_23_52_+	23	52	.......................CGGTACCCGCTCCGGCGCCGGCCCGCGGG.........................................................	29	CGGTACCCGCTCCGGCGCCGGCCCGCGGG	3	0.1451	0.00148061	0	0	0	0	0	0	0	0.0469	0.0982	0	0	0	0	0	0	0	0	0	0	0	0	0	0	0	0	0	0	0	0	0	0	0	0	0	0	0	0	0	0	0	0
mmu-mir-712_25_55_+	25	55	.........................GTACCCGCTCCGGCGCCGGCCCGCGGGACG......................................................	30	GTACCCGCTCCGGCGCCGGCCCGCGGGACG	3	0.3653	0.00372755	0	0	0	0	0	0	0	0	0	0	0	0	0	0	0	0	0	0	0	0	0	0	0	0	0	0	0	0	0	0	0	0	0	0	0	0	0	0	0	0	0
mmu-mir-712_26_53_+	26	53	..........................TACCCGCTCCGGCGCCGGCCCGCGGGA........................................................	27	TACCCGCTCCGGCGCCGGCCCGCGGGA	3	1.2739	0.012999	0	0	0	0	0	0	0	0	0	0	0	0	0	0	0	0	0	0	0	0	0	0	0	0	0	0	0	0	0	0	0	0	0	0	0	0	0	0	0	0	0
mmu-mir-712_29_52_+	29	52	.............................CCGCTCCGGCGCCGGCCCGCGGG.........................................................	23	CCGCTCCGGCGCCGGCCCGCGGG	3	0.5055	0.00515816	0	0	0	0	0	0	0	0	0	0	0	0	0	0	0	0	0	0	0	0	0	0	0	0	0	0	0	0	0	0	0	0	0	0	0	0	0	0	0	0	0
mmu-mir-712_30_60_+	30	60	..............................CGCTCCGGCGCCGGCCCGCGGGACGCCGCG.................................................	30	CGCTCCGGCGCCGGCCCGCGGGACGCCGCG	3	2.8665	0.02925	0	0	0	0	0	0	0	0	0.0982	0	0	0	0	0	0	0	0	0	0	0	0	0	0	0	0	0	0	0	0	0	0	2.7683	0	0	0	0	0	0	0	0	0
mmu-mir-712_32_58_+	32	58	................................CTCCGGCGCCGGCCCGCGGGACGCCG...................................................	26	CTCCGGCGCCGGCCCGCGGGACGCCG	3	0.1482	0.00151224	0	0.1482	0	0	0	0	0	0	0	0	0	0	0	0	0	0	0	0	0	0	0	0	0	0	0	0	0	0	0	0	0	0	0	0	0	0	0	0	0	0	0
mmu-mir-712_33_59_+	33	59	.................................TCCGGCGCCGGCCCGCGGGACGCCGC..................................................	26	TCCGGCGCCGGCCCGCGGGACGCCGC	3	1.0168	0.0103755	0	0	0	0	0	0	0	0	0	0	0	0	0	0	0	0	0	0	0	0	0	0	0	0	0	0	0	0	0	0	0	0	0	0	0	0	0	0	0	0	0
mmu-mir-712_33_63_+	33	63	.................................TCCGGCGCCGGCCCGCGGGACGCCGCGGCG..............................................	30	TCCGGCGCCGGCCCGCGGGACGCCGCGGCG	3	0.1472	0.00150204	0	0	0	0	0	0	0	0	0.1472	0	0	0	0	0	0	0	0	0	0	0	0	0	0	0	0	0	0	0	0	0	0	0	0	0	0	0	0	0	0	0	0
mmu-mir-712_36_59_+	36	59	....................................GGCGCCGGCCCGCGGGACGCCGC..................................................	23	GGCGCCGGCCCGCGGGACGCCGC	3	0.706	0.00720408	0	0	0	0	0	0	0	0	0	0	0	0	0	0	0	0	0	0	0	0	0	0	0	0	0	0	0	0	0	0	0	0	0	0	0	0	0	0	0	0	0
mmu-mir-712_36_64_+	36	64	....................................GGCGCCGGCCCGCGGGACGCCGCGGCGT.............................................	28	GGCGCCGGCCCGCGGGACGCCGCGGCGT	3	0.1472	0.00150204	0	0	0	0	0	0	0	0	0.1472	0	0	0	0	0	0	0	0	0	0	0	0	0	0	0	0	0	0	0	0	0	0	0	0	0	0	0	0	0	0	0	0
mmu-mir-712_37_55_+	37	55	.....................................GCGCCGGCCCGCGGGACG......................................................	18	GCGCCGGCCCGCGGGACG	3	0.3755	0.00383163	0	0	0	0	0	0	0	0	0	0	0	0	0	0	0	0	0	0	0	0	0	0	0	0	0	0	0	0	0	0	0	0	0	0	0	0	0	0	0	0	0
mmu-mir-712_40_66_+	40	66	........................................CCGGCCCGCGGGACGCCGCGGCGTCC...........................................	26	CCGGCCCGCGGGACGCCGCGGCGTCC	3	0.182	0.00185714	0.182	0	0	0	0	0	0	0	0	0	0	0	0	0	0	0	0	0	0	0	0	0	0	0	0	0	0	0	0	0	0	0	0	0	0	0	0	0	0	0	0
mmu-mir-712_43_67_+	43	67	...........................................GCCCGCGGGACGCCGCGGCGTCCG..........................................	24	GCCCGCGGGACGCCGCGGCGTCCG	3	1.5407	0.0157214	0	0	0	0	0	0	0	0	0	0	0	0	0	0	0	0	0	0	1.4488	0	0	0	0	0	0	0	0	0	0	0	0	0	0	0	0	0	0	0	0	0	0
mmu-mir-712_46_68_+	46	68	..............................................CGCGGGACGCCGCGGCGTCCGT.........................................	22	CGCGGGACGCCGCGGCGTCCGT	3	0.1472	0.00150204	0	0	0	0	0	0	0	0	0.1472	0	0	0	0	0	0	0	0	0	0	0	0	0	0	0	0	0	0	0	0	0	0	0	0	0	0	0	0	0	0	0	0
mmu-mir-712_48_67_+	48	67	................................................CGGGACGCCGCGGCGTCCG..........................................	19	CGGGACGCCGCGGCGTCCG	3	0.185	0.00188776	0	0	0.185	0	0	0	0	0	0	0	0	0	0	0	0	0	0	0	0	0	0	0	0	0	0	0	0	0	0	0	0	0	0	0	0	0	0	0	0	0	0
mmu-mir-712_55_81_+	55	81	.......................................................CCGCGGCGTCCGTGCGCCGATGCGAG............................	26	CCGCGGCGTCCGTGCGCCGATGCGAG	3	0.7386	0.00753673	0	0	0	0	0	0	0	0	0	0	0	0	0	0	0	0	0	0	0	0	0	0	0	0	0	0	0	0	0.3615	0	0	0	0	0	0	0	0	0	0	0	0
mmu-mir-712_58_76_+	58	76	..........................................................CGGCGTCCGTGCGCCGAT.................................	18	CGGCGTCCGTGCGCCGAT	3	0.5473	0.00558469	0	0	0	0	0	0	0	0	0	0	0	0	0	0	0	0	0	0	0	0	0	0	0	0	0	0	0	0	0.3615	0	0	0	0	0	0	0	0	0	0	0	0
mmu-mir-712_60_78_+	60	78	............................................................GCGTCCGTGCGCCGATGC...............................	18	GCGTCCGTGCGCCGATGC	3	0.4402	0.00449184	0	0	0	0	0	0	0	0	0	0	0	0	0	0	0	0	0	0	0	0	0	0	0	0	0	0	0	0	0	0	0	0	0	0	0	0	0	0	0	0	0
mmu-mir-712_60_82_+	60	82	............................................................GCGTCCGTGCGCCGATGCGAGT...........................	22	GCGTCCGTGCGCCGATGCGAGT	3	0.406	0.00414286	0	0	0	0	0	0	0	0	0	0	0	0	0	0	0	0	0	0	0	0	0	0	0	0	0	0	0	0	0	0	0	0	0	0	0	0	0	0	0	0	0
mmu-mir-712_63_86_+	63	86	...............................................................TCCGTGCGCCGATGCGAGTCACC.......................	23	TCCGTGCGCCGATGCGAGTCACC	3	0.9468	0.00966122	0	0	0	0.0539	0	0	0	0	0	0	0	0	0	0	0	0	0	0	0.7244	0	0	0	0	0	0	0	0	0	0	0	0	0	0	0	0	0	0	0	0	0	0
mmu-mir-712_64_82_+	64	82	................................................................CCGTGCGCCGATGCGAGT...........................	18	CCGTGCGCCGATGCGAGT	3	0.182	0.00185714	0.182	0	0	0	0	0	0	0	0	0	0	0	0	0	0	0	0	0	0	0	0	0	0	0	0	0	0	0	0	0	0	0	0	0	0	0	0	0	0	0	0
mmu-mir-712_64_93_+	64	93	................................................................CCGTGCGCCGATGCGAGTCACCCCCGGGT................	29	CCGTGCGCCGATGCGAGTCACCCCCGGGT	3	0.2694	0.00274898	0	0	0.1233	0	0	0	0	0	0	0	0	0	0	0	0	0	0	0	0	0	0	0	0	0	0	0	0	0	0	0	0	0	0	0	0	0	0	0	0	0	0
mmu-mir-712_69_91_+	69	91	.....................................................................CGCCGATGCGAGTCACCCCCGG..................	22	CGCCGATGCGAGTCACCCCCGG	3	0.185	0.00188776	0	0	0.185	0	0	0	0	0	0	0	0	0	0	0	0	0	0	0	0	0	0	0	0	0	0	0	0	0	0	0	0	0	0	0	0	0	0	0	0	0	0
mmu-mir-712_69_94_+	69	94	.....................................................................CGCCGATGCGAGTCACCCCCGGGTG...............	25	CGCCGATGCGAGTCACCCCCGGGTG	3	0.2613	0.00266633	0	0	0	0	0	0	0	0.0938	0	0	0	0	0	0	0	0	0	0	0	0	0	0	0	0	0	0	0	0	0	0	0	0	0	0	0	0	0	0	0	0	0
mmu-mir-712_71_91_+	71	91	.......................................................................CCGATGCGAGTCACCCCCGG..................	20	CCGATGCGAGTCACCCCCGG	3	0.2693	0.00274796	0	0	0	0.0539	0	0	0	0.0469	0	0	0	0	0	0	0	0	0	0	0	0	0	0	0	0	0	0	0	0	0	0	0	0	0	0	0	0	0	0	0	0	0
mmu-mir-712_73_96_+	73	96	.........................................................................GATGCGAGTCACCCCCGGGTGTT.............	23	GATGCGAGTCACCCCCGGGTGTT	3	0.2883	0.00294184	0	0	0	0	0	0	0	0	0	0	0	0	0	0	0	0	0	0	0	0	0	0	0	0	0	0	0	0	0	0	0	0	0	0	0	0	0	0	0	0	0
mmu-mir-712_73_98_+	73	98	.........................................................................GATGCGAGTCACCCCCGGGTGTTGC...........	25	GATGCGAGTCACCCCCGGGTGTTGC	3	0.6219	0.00634592	0	0	0	0	0	0	0	0	0	0	0	0	0	0	0	0	0	0	0	0	0	0	0	0	0	0	0	0	0.3615	0	0	0	0	0	0	0	0	0	0	0	0
mmu-mir-712_76_97_+	76	97	............................................................................GCGAGTCACCCCCGGGTGTTG............	21	GCGAGTCACCCCCGGGTGTTG	3	0.8781	0.0089602	0	0	0	0	0	0	0	0	0	0	0	0	0	0	0	0	0	0	0	0	0	0	0	0	0	0	0	0	0.3615	0	0	0	0	0	0	0	0	0	0	0	0
mmu-mir-712_77_97_+	77	97	.............................................................................CGAGTCACCCCCGGGTGTTG............	20	CGAGTCACCCCCGGGTGTTG	3	1.0845	0.0110663	0	0	0	0	0	0	0	0	0	0	0	0	0	0	0	0	0	0	0	0	0	0	0	0	0	0	0	0	1.0845	0	0	0	0	0	0	0	0	0	0	0	0
mmu-mir-712_77_106_+	77	106	.............................................................................CGAGTCACCCCCGGGTGTTGCGAGTTCGG...	29	CGAGTCACCCCCGGGTGTTGCGAGTTCGG	3	0.5372	0.00548163	0	0	0	0	0	0	0	0	0	0	0	0	0	0	0	0	0	0	0	0	0	0	0	0	0	0	0	0	0	0	0	0	0	0	0.2451	0	0	0	0	0	0
mmu-mir-712_79_98_+	79	98	...............................................................................AGTCACCCCCGGGTGTTGC...........	19	AGTCACCCCCGGGTGTTGC	3	2.5432	0.025951	0	0	0	0	0	0	0	0	0	0	0	0	0	0	1.8188	0	0	0	0.7244	0	0	0	0	0	0	0	0	0	0	0	0	0	0	0	0	0	0	0	0	0	0
mmu-mir-712_79_104_+	79	104	...............................................................................AGTCACCCCCGGGTGTTGCGAGTTC.....	25	AGTCACCCCCGGGTGTTGCGAGTTC	3	1.0845	0.0110663	0	0	0	0	0	0	0	0	0	0	0	0	0	0	0	0	0	0	0	0	0	0	0	0	0	0	0	0	1.0845	0	0	0	0	0	0	0	0	0	0	0	0
mmu-mir-712_79_106_+	79	106	...............................................................................AGTCACCCCCGGGTGTTGCGAGTTCGG...	27	AGTCACCCCCGGGTGTTGCGAGTTCGG	3	0.4422	0.00451224	0	0	0	0	0	0	0	0	0	0	0	0	0	0	0	0	0	0	0	0	0	0	0	0	0	0	0	0	0	0	0	0	0	0	0	0	0	0	0	0	0
mmu-mir-712_79_109_+	79	109	...............................................................................AGTCACCCCCGGGTGTTGCGAGTTCGGGGA	30	AGTCACCCCCGGGTGTTGCGAGTTCGGGGA	3	0.1407	0.00143571	0	0	0	0	0.1407	0	0	0	0	0	0	0	0	0	0	0	0	0	0	0	0	0	0	0	0	0	0	0	0	0	0	0	0	0	0	0	0	0	0	0	0
mmu-mir-712_80_100_+	80	100	................................................................................GTCACCCCCGGGTGTTGCGA.........	20	GTCACCCCCGGGTGTTGCGA	3	0.7988	0.00815102	0	0	0	0	0	0	0	0	0	0	0	0	0	0	0	0	0	0	0	0	0	0	0	0	0	0	0	0	0.3615	0	0	0	0	0	0	0	0	0	0	0	0
mmu-mir-712_80_103_+	80	103	................................................................................GTCACCCCCGGGTGTTGCGAGTT......	23	GTCACCCCCGGGTGTTGCGAGTT	3	1.0845	0.0110663	0	0	0	0	0	0	0	0	0	0	0	0	0	0	0	0	0	0	0	0	0	0	0	0	0	0	0	0	1.0845	0	0	0	0	0	0	0	0	0	0	0	0
mmu-mir-712_82_100_+	82	100	..................................................................................CACCCCCGGGTGTTGCGA.........	18	CACCCCCGGGTGTTGCGA	3	1.1455	0.0116888	0	0	0	0	0	0	0	0.0469	0	0	0	0	0	0	0	0.7371	0	0	0	0	0	0	0	0	0	0	0	0	0.3615	0	0	0	0	0	0	0	0	0	0	0	0
mmu-mir-712_82_106_+	82	106	..................................................................................CACCCCCGGGTGTTGCGAGTTCGG...	24	CACCCCCGGGTGTTGCGAGTTCGG	3	0.4059	0.00414184	0	0	0	0	0	0	0	0	0	0	0	0	0	0	0	0	0	0	0	0	0	0	0	0	0	0	0	0	0	0	0	0	0	0	0	0	0	0	0	0	0
mmu-mir-712_83_107_+	83	107	...................................................................................ACCCCCGGGTGTTGCGAGTTCGGG..	24	ACCCCCGGGTGTTGCGAGTTCGGG	3	0.4828	0.00492653	0.1213	0	0	0	0	0	0	0	0	0	0	0	0	0	0	0	0	0	0	0	0	0	0	0	0	0	0	0	0.3615	0	0	0	0	0	0	0	0	0	0	0	0
mmu-mir-712_84_107_+	84	107	....................................................................................CCCCCGGGTGTTGCGAGTTCGGG..	23	CCCCCGGGTGTTGCGAGTTCGGG	3	0.854	0.00871429	0	0	0	0	0	0	0	0	0	0	0	0	0	0	0	0	0	0	0	0	0	0	0	0	0	0	0	0	0	0	0	0	0	0	0	0	0	0	0	0	0
mmu-mir-712_85_104_+	85	104	.....................................................................................CCCCGGGTGTTGCGAGTTC.....	19	CCCCGGGTGTTGCGAGTTC	3	0.2253	0.00229898	0.1213	0	0	0	0	0	0	0	0	0	0	0	0	0	0	0	0	0	0	0	0	0	0	0	0	0	0	0	0	0	0	0	0	0	0	0	0	0	0	0	0
mmu-mir-712_85_106_+	85	106	.....................................................................................CCCCGGGTGTTGCGAGTTCGG...	21	CCCCGGGTGTTGCGAGTTCGG	3	0.6576	0.0067102	0	0	0	0	0	0	0	0	0	0	0	0	0	0	0	0	0	0	0	0	0	0	0	0	0	0	0	0	0.3615	0	0	0	0	0	0	0	0	0	0	0	0
mmu-mir-712_85_107_+	85	107	.....................................................................................CCCCGGGTGTTGCGAGTTCGGG..	22	CCCCGGGTGTTGCGAGTTCGGG	3	1.2288	0.0125388	0	0	0	0	0	0	0	0	0	0	0	0	0	0	0	0	0	0	0	0.669	0	0	0	0	0	0	0	0	0.3615	0	0	0	0	0	0	0	0	0	0	0	0
mmu-mir-712_85_109_+	85	109	.....................................................................................CCCCGGGTGTTGCGAGTTCGGGGA	24	CCCCGGGTGTTGCGAGTTCGGGGA	3	0.7905	0.00806633	0	0	0	0	0	0	0	0	0	0	0	0	0	0	0	0	0	0	0	0	0	0	0	0	0	0	0	0	0	0	0	0	0	0	0	0	0	0	0	0	0
mmu-mir-712_86_105_+	86	105	......................................................................................CCCGGGTGTTGCGAGTTCG....	19	CCCGGGTGTTGCGAGTTCG	3	0.3209	0.00327449	0	0.0494	0	0	0	0	0	0	0	0	0	0	0	0	0	0	0	0	0	0	0	0	0	0	0	0	0	0	0	0	0	0	0	0	0	0	0	0	0	0	0
mmu-mir-712_88_107_+	88	107	........................................................................................CGGGTGTTGCGAGTTCGGG..	19	CGGGTGTTGCGAGTTCGGG	3	0.4851	0.00495	0	0	0	0	0	0	0	0	0	0	0	0	0	0	0	0	0	0	0	0	0	0	0	0	0	0	0	0	0	0	0	0	0	0	0	0	0	0	0	0	0
mmu-mir-712_90_108_+	90	108	..........................................................................................GGTGTTGCGAGTTCGGGG.	18	GGTGTTGCGAGTTCGGGG	3	0.5055	0.00515816	0	0	0	0	0	0	0	0	0	0	0	0	0	0	0	0	0	0	0	0	0	0	0	0	0	0	0	0	0	0	0	0	0	0	0.2451	0	0	0	0	0	0
mmu-mir-712_1_23_+	1	23	.CTCCGCTTCTCCTTCACCCGGG......................................................................................	22	CTCCGCTTCTCCTTCACCCGGG	2	4.383	0.0447245	0	0	0	0	0	0	0	0.0469	0	0	0	0	0	0	0	0	0	0	0	0	0	0	0	0	4.3361	0	0	0	0	0	0	0	0	0	0	0	0	0	0	0	0
mmu-mir-712_2_26_+	2	26	..TCCGCTTCTCCTTCACCCGGGCGG...................................................................................	24	TCCGCTTCTCCTTCACCCGGGCGG	2	0.0938	0.000957143	0	0	0	0	0	0	0	0.0938	0	0	0	0	0	0	0	0	0	0	0	0	0	0	0	0	0	0	0	0	0	0	0	0	0	0	0	0	0	0	0	0	0
mmu-mir-712_3_25_+	3	25	...CCGCTTCTCCTTCACCCGGGCG....................................................................................	22	CCGCTTCTCCTTCACCCGGGCG	2	0.1077	0.00109898	0	0	0	0.1077	0	0	0	0	0	0	0	0	0	0	0	0	0	0	0	0	0	0	0	0	0	0	0	0	0	0	0	0	0	0	0	0	0	0	0	0	0
mmu-mir-712_3_26_+	3	26	...CCGCTTCTCCTTCACCCGGGCGG...................................................................................	23	CCGCTTCTCCTTCACCCGGGCGG	2	0.723	0.00737755	0	0	0	0	0	0	0	0	0	0	0	0	0	0	0	0	0	0	0	0	0	0	0	0	0	0	0	0	0.723	0	0	0	0	0	0	0	0	0	0	0	0
mmu-mir-712_4_25_+	4	25	....CGCTTCTCCTTCACCCGGGCG....................................................................................	21	CGCTTCTCCTTCACCCGGGCG	2	0.4084	0.00416735	0	0	0	0	0.0469	0	0	0	0	0	0	0	0	0	0	0	0	0	0	0	0	0	0	0	0	0	0	0	0.3615	0	0	0	0	0	0	0	0	0	0	0	0
mmu-mir-712_5_27_+	5	27	.....GCTTCTCCTTCACCCGGGCGGT..................................................................................	22	GCTTCTCCTTCACCCGGGCGGT	2	3.2185	0.0328418	0	0	0	0	0	0	0	0	0	0	0	0	0	0	0	0	0	3.0202	0	0	0	0	0	0	0	0	0	0	0	0	0	0	0	0	0	0	0	0	0	0	0
mmu-mir-712_7_27_+	7	27	.......TTCTCCTTCACCCGGGCGGT..................................................................................	20	TTCTCCTTCACCCGGGCGGT	2	2.8723	0.0293092	0	0	0	0	0	0	0	0	0	0	0	0	0	0	0	0	0	0	0	0	0	0	0	0	0	0	0	0	0	0	0	2.7683	0	0	0	0	0	0	0	0	0
mmu-mir-712_7_35_+	7	35	.......TTCTCCTTCACCCGGGCGGTACCCGCTC..........................................................................	28	TTCTCCTTCACCCGGGCGGTACCCGCTC	2	0.1031	0.00105204	0	0	0	0	0.0469	0	0.0562	0	0	0	0	0	0	0	0	0	0	0	0	0	0	0	0	0	0	0	0	0	0	0	0	0	0	0	0	0	0	0	0	0	0
mmu-mir-712_8_34_+	8	34	........TCTCCTTCACCCGGGCGGTACCCGCT...........................................................................	26	TCTCCTTCACCCGGGCGGTACCCGCT	2	0.7494	0.00764694	0	0	0	0	0	0	0	0	0	0	0	0	0	0	0	0	0	0	0	0	0	0	0	0	0	0	0	0	0	0	0	0	0	0	0	0	0	0	0	0	0
mmu-mir-712_8_37_+	8	37	........TCTCCTTCACCCGGGCGGTACCCGCTCCG........................................................................	29	TCTCCTTCACCCGGGCGGTACCCGCTCCG	2	0.0938	0.000957143	0	0	0	0	0	0	0	0.0938	0	0	0	0	0	0	0	0	0	0	0	0	0	0	0	0	0	0	0	0	0	0	0	0	0	0	0	0	0	0	0	0	0
mmu-mir-712_9_37_+	9	37	.........CTCCTTCACCCGGGCGGTACCCGCTCCG........................................................................	28	CTCCTTCACCCGGGCGGTACCCGCTCCG	2	0.096	0.000979592	0	0	0	0	0	0	0	0.0469	0.0491	0	0	0	0	0	0	0	0	0	0	0	0	0	0	0	0	0	0	0	0	0	0	0	0	0	0	0	0	0	0	0	0
mmu-mir-712_10_32_+	10	32	..........TCCTTCACCCGGGCGGTACCCG.............................................................................	22	TCCTTCACCCGGGCGGTACCCG	2	0.1008	0.00102857	0	0	0	0.0539	0	0	0	0.0469	0	0	0	0	0	0	0	0	0	0	0	0	0	0	0	0	0	0	0	0	0	0	0	0	0	0	0	0	0	0	0	0	0
mmu-mir-712_10_37_+	10	37	..........TCCTTCACCCGGGCGGTACCCGCTCCG........................................................................	27	TCCTTCACCCGGGCGGTACCCGCTCCG	2	0.1959	0.00199898	0	0	0	0	0	0	0	0	0	0	0	0	0	0	0	0	0	0	0	0	0	0	0	0	0	0	0	0	0	0	0	0	0	0	0	0	0	0	0	0	0
mmu-mir-712_11_30_+	11	30	...........CCTTCACCCGGGCGGTACC...............................................................................	19	CCTTCACCCGGGCGGTACC	2	0.2166	0.0022102	0	0	0	0	0	0	0	0	0.0491	0	0	0	0	0	0	0	0	0	0	0	0	0	0	0	0	0	0	0	0	0	0	0	0	0	0	0	0	0	0	0	0
mmu-mir-712_12_38_+	12	38	............CTTCACCCGGGCGGTACCCGCTCCGG.......................................................................	26	CTTCACCCGGGCGGTACCCGCTCCGG	2	0.1008	0.00102857	0	0	0	0.0539	0	0	0	0.0469	0	0	0	0	0	0	0	0	0	0	0	0	0	0	0	0	0	0	0	0	0	0	0	0	0	0	0	0	0	0	0	0	0
mmu-mir-712_12_41_+	12	41	............CTTCACCCGGGCGGTACCCGCTCCGGCGC....................................................................	29	CTTCACCCGGGCGGTACCCGCTCCGGCGC	2	0.1213	0.00123776	0.1213	0	0	0	0	0	0	0	0	0	0	0	0	0	0	0	0	0	0	0	0	0	0	0	0	0	0	0	0	0	0	0	0	0	0	0	0	0	0	0	0
mmu-mir-712_16_40_+	16	40	................ACCCGGGCGGTACCCGCTCCGGCG.....................................................................	24	ACCCGGGCGGTACCCGCTCCGGCG	2	0.5287	0.0053949	0	0	0	0	0	0	0	0	0	0	0	0	0	0	0	0	0	0	0	0	0	0	0	0	0	0	0	0	0	0	0	0	0	0	0	0	0	0	0	0	0
mmu-mir-712_18_42_+	18	42	..................CCGGGCGGTACCCGCTCCGGCGCC...................................................................	24	CCGGGCGGTACCCGCTCCGGCGCC	2	0.1077	0.00109898	0	0	0	0.1077	0	0	0	0	0	0	0	0	0	0	0	0	0	0	0	0	0	0	0	0	0	0	0	0	0	0	0	0	0	0	0	0	0	0	0	0	0
mmu-mir-712_18_44_+	18	44	..................CCGGGCGGTACCCGCTCCGGCGCCGG.................................................................	26	CCGGGCGGTACCCGCTCCGGCGCCGG	2	0.0938	0.000957143	0	0	0	0	0.0938	0	0	0	0	0	0	0	0	0	0	0	0	0	0	0	0	0	0	0	0	0	0	0	0	0	0	0	0	0	0	0	0	0	0	0	0
mmu-mir-712_19_44_+	19	44	...................CGGGCGGTACCCGCTCCGGCGCCGG.................................................................	25	CGGGCGGTACCCGCTCCGGCGCCGG	2	0.0982	0.00100204	0	0	0	0	0	0	0	0	0.0982	0	0	0	0	0	0	0	0	0	0	0	0	0	0	0	0	0	0	0	0	0	0	0	0	0	0	0	0	0	0	0	0
mmu-mir-712_20_38_+	20	38	....................GGGCGGTACCCGCTCCGG.......................................................................	18	GGGCGGTACCCGCTCCGG	2	0.336	0.00342857	0	0	0	0	0	0	0	0	0	0	0	0	0	0	0	0	0	0	0	0	0	0	0	0	0	0	0	0	0	0	0	0	0	0	0	0	0	0	0	0	0
mmu-mir-712_21_41_+	21	41	.....................GGCGGTACCCGCTCCGGCGC....................................................................	20	GGCGGTACCCGCTCCGGCGC	2	0.2619	0.00267245	0	0	0	0	0	0	0	0	0	0	0	0	0	0	0	0	0	0	0	0	0	0	0	0	0	0	0	0	0	0	0	0	0	0	0	0	0	0	0	0	0
mmu-mir-712_21_43_+	21	43	.....................GGCGGTACCCGCTCCGGCGCCG..................................................................	22	GGCGGTACCCGCTCCGGCGCCG	2	0.523	0.00533673	0	0	0	0	0	0	0	0	0	0	0	0	0	0	0	0	0	0	0	0	0	0	0	0	0	0	0	0	0	0	0	0	0	0	0	0	0	0	0	0	0
mmu-mir-712_22_47_+	22	47	......................GCGGTACCCGCTCCGGCGCCGGCCC..............................................................	25	GCGGTACCCGCTCCGGCGCCGGCCC	2	0.0988	0.00100816	0	0.0988	0	0	0	0	0	0	0	0	0	0	0	0	0	0	0	0	0	0	0	0	0	0	0	0	0	0	0	0	0	0	0	0	0	0	0	0	0	0	0
mmu-mir-712_22_50_+	22	50	......................GCGGTACCCGCTCCGGCGCCGGCCCGCG...........................................................	28	GCGGTACCCGCTCCGGCGCCGGCCCGCG	2	0.3464	0.00353469	0	0	0	0	0	0	0	0	0	0	0	0	0	0	0	0	0	0	0	0	0	0	0	0	0	0	0	0	0	0	0	0	0	0	0	0	0	0	0	0	0
mmu-mir-712_23_44_+	23	44	.......................CGGTACCCGCTCCGGCGCCGG.................................................................	21	CGGTACCCGCTCCGGCGCCGG	2	0.3658	0.00373265	0	0	0	0	0	0	0	0	0	0	0	0	0	0	0	0	0	0	0	0	0	0	0	0	0	0	0	0	0	0	0	0	0	0	0	0	0	0	0	0	0
mmu-mir-712_24_42_+	24	42	........................GGTACCCGCTCCGGCGCC...................................................................	18	GGTACCCGCTCCGGCGCC	2	0.193	0.00196939	0	0	0	0	0	0	0	0.0469	0	0	0	0	0	0	0	0	0	0	0	0	0	0	0	0	0	0	0	0	0	0	0	0	0	0	0	0	0	0	0	0	0
mmu-mir-712_24_52_+	24	52	........................GGTACCCGCTCCGGCGCCGGCCCGCGGG.........................................................	28	GGTACCCGCTCCGGCGCCGGCCCGCGGG	2	0.1413	0.00144184	0	0.0494	0	0	0	0	0	0	0	0	0	0	0	0	0	0	0	0	0	0	0	0	0	0	0	0	0	0	0	0	0	0	0	0	0	0	0	0	0	0	0
mmu-mir-712_26_44_+	26	44	..........................TACCCGCTCCGGCGCCGG.................................................................	18	TACCCGCTCCGGCGCCGG	2	0.0938	0.000957143	0	0	0	0	0.0938	0	0	0	0	0	0	0	0	0	0	0	0	0	0	0	0	0	0	0	0	0	0	0	0	0	0	0	0	0	0	0	0	0	0	0	0
mmu-mir-712_26_45_+	26	45	..........................TACCCGCTCCGGCGCCGGC................................................................	19	TACCCGCTCCGGCGCCGGC	2	0.7537	0.00769082	0	0	0	0	0	0	0	0	0	0	0	0	0	0	0	0	0	0	0	0	0	0	0	0	0	0	0	0	0	0	0	0	0	0	0	0	0	0	0	0.469	0
mmu-mir-712_28_52_+	28	52	............................CCCGCTCCGGCGCCGGCCCGCGGG.........................................................	24	CCCGCTCCGGCGCCGGCCCGCGGG	2	0.8493	0.00866633	0	0	0	0	0	0	0	0	0	0	0	0	0	0	0	0	0	0	0	0	0	0	0	0	0	0	0	0	0	0	0	0	0	0	0	0	0	0	0	0	0
mmu-mir-712_29_59_+	29	59	.............................CCGCTCCGGCGCCGGCCCGCGGGACGCCGC..................................................	30	CCGCTCCGGCGCCGGCCCGCGGGACGCCGC	2	0.096	0.000979592	0	0	0	0	0	0	0	0.0469	0.0491	0	0	0	0	0	0	0	0	0	0	0	0	0	0	0	0	0	0	0	0	0	0	0	0	0	0	0	0	0	0	0	0
mmu-mir-712_30_55_+	30	55	..............................CGCTCCGGCGCCGGCCCGCGGGACG......................................................	25	CGCTCCGGCGCCGGCCCGCGGGACG	2	0.2651	0.0027051	0	0	0	0	0	0.0612	0	0	0	0	0	0	0	0	0	0	0	0	0	0	0	0	0	0	0	0	0	0	0	0	0	0	0	0	0	0.2039	0	0	0	0	0
mmu-mir-712_31_55_+	31	55	...............................GCTCCGGCGCCGGCCCGCGGGACG......................................................	24	GCTCCGGCGCCGGCCCGCGGGACG	2	0.1964	0.00200408	0	0	0	0	0	0	0	0	0	0	0	0	0	0	0	0	0	0	0	0	0	0	0	0	0	0	0	0	0	0	0	0	0	0	0	0	0	0	0	0	0
mmu-mir-712_32_55_+	32	55	................................CTCCGGCGCCGGCCCGCGGGACG......................................................	23	CTCCGGCGCCGGCCCGCGGGACG	2	0.3716	0.00379184	0	0	0	0	0	0	0	0.0469	0	0	0	0	0	0	0	0	0	0	0	0	0	0	0	0	0	0	0	0	0	0	0	0	0	0	0	0	0	0	0	0	0
mmu-mir-712_33_61_+	33	61	.................................TCCGGCGCCGGCCCGCGGGACGCCGCGG................................................	28	TCCGGCGCCGGCCCGCGGGACGCCGCGG	2	0.0988	0.00100816	0	0.0988	0	0	0	0	0	0	0	0	0	0	0	0	0	0	0	0	0	0	0	0	0	0	0	0	0	0	0	0	0	0	0	0	0	0	0	0	0	0	0
mmu-mir-712_34_62_+	34	62	..................................CCGGCGCCGGCCCGCGGGACGCCGCGGC...............................................	28	CCGGCGCCGGCCCGCGGGACGCCGCGGC	2	0.0963	0.000982653	0	0.0494	0	0	0	0	0	0.0469	0	0	0	0	0	0	0	0	0	0	0	0	0	0	0	0	0	0	0	0	0	0	0	0	0	0	0	0	0	0	0	0	0
mmu-mir-712_34_64_+	34	64	..................................CCGGCGCCGGCCCGCGGGACGCCGCGGCGT.............................................	30	CCGGCGCCGGCCCGCGGGACGCCGCGGCGT	2	0.0938	0.000957143	0	0	0	0	0	0	0	0.0938	0	0	0	0	0	0	0	0	0	0	0	0	0	0	0	0	0	0	0	0	0	0	0	0	0	0	0	0	0	0	0	0	0
mmu-mir-712_36_55_+	36	55	....................................GGCGCCGGCCCGCGGGACG......................................................	19	GGCGCCGGCCCGCGGGACG	2	0.4373	0.00446224	0	0	0	0	0	0	0	0	0	0	0	0	0	0	0	0	0	0	0	0	0	0	0	0	0	0	0	0	0	0	0	0	0	0	0	0	0	0	0	0	0
mmu-mir-712_37_61_+	37	61	.....................................GCGCCGGCCCGCGGGACGCCGCGG................................................	24	GCGCCGGCCCGCGGGACGCCGCGG	2	0.4922	0.00502245	0	0	0	0	0	0	0	0	0	0	0	0	0	0	0	0	0	0	0	0	0	0	0	0	0	0	0	0	0	0	0	0	0	0	0	0	0	0	0	0	0
mmu-mir-712_40_64_+	40	64	........................................CCGGCCCGCGGGACGCCGCGGCGT.............................................	24	CCGGCCCGCGGGACGCCGCGGCGT	2	1.4488	0.0147837	0	0	0	0	0	0	0	0	0	0	0	0	0	0	0	0	0	0	1.4488	0	0	0	0	0	0	0	0	0	0	0	0	0	0	0	0	0	0	0	0	0	0
mmu-mir-712_44_69_+	44	69	............................................CCCGCGGGACGCCGCGGCGTCCGTG........................................	25	CCCGCGGGACGCCGCGGCGTCCGTG	2	0.9392	0.00958367	0	0	0.0617	0	0	0	0	0	0	0	0	0	0	0	0	0	0	0	0	0	0	0	0.8775	0	0	0	0	0	0	0	0	0	0	0	0	0	0	0	0	0	0
mmu-mir-712_45_63_+	45	63	.............................................CCGCGGGACGCCGCGGCG..............................................	18	CCGCGGGACGCCGCGGCG	2	0.1972	0.00201224	0	0	0	0	0	0	0	0	0.0491	0	0	0	0	0	0	0	0	0	0	0	0	0	0	0	0	0	0	0	0	0	0	0	0	0	0	0	0	0	0	0	0
mmu-mir-712_49_77_+	49	77	.................................................GGGACGCCGCGGCGTCCGTGCGCCGATG................................	28	GGGACGCCGCGGCGTCCGTGCGCCGATG	2	0.0938	0.000957143	0	0	0	0	0	0	0	0.0938	0	0	0	0	0	0	0	0	0	0	0	0	0	0	0	0	0	0	0	0	0	0	0	0	0	0	0	0	0	0	0	0	0
mmu-mir-712_52_76_+	52	76	....................................................ACGCCGCGGCGTCCGTGCGCCGAT.................................	24	ACGCCGCGGCGTCCGTGCGCCGAT	2	1.519	0.0155	0	0	0	0	0	0	0	0	0	0	0	0	0	0	0	0	0	0	0	0	0	0	0	0	0	0	0	0	0	0	0	0	0	0	0	0	0	0	0	0	0
mmu-mir-712_52_78_+	52	78	....................................................ACGCCGCGGCGTCCGTGCGCCGATGC...............................	26	ACGCCGCGGCGTCCGTGCGCCGATGC	2	0.784	0.008	0	0	0	0	0	0	0	0.0469	0	0	0	0	0	0	0	0.7371	0	0	0	0	0	0	0	0	0	0	0	0	0	0	0	0	0	0	0	0	0	0	0	0	0
mmu-mir-712_54_81_+	54	81	......................................................GCCGCGGCGTCCGTGCGCCGATGCGAG............................	27	GCCGCGGCGTCCGTGCGCCGATGCGAG	2	0.5287	0.0053949	0	0	0	0	0	0	0	0	0	0	0	0	0	0	0	0	0	0	0	0	0	0	0	0	0	0	0	0	0	0	0	0	0	0	0	0	0	0	0	0	0
mmu-mir-712_56_81_+	56	81	........................................................CGCGGCGTCCGTGCGCCGATGCGAG............................	25	CGCGGCGTCCGTGCGCCGATGCGAG	2	0.4534	0.00462653	0	0	0	0	0	0	0	0	0	0	0	0	0	0	0	0	0	0	0	0	0	0	0	0	0	0	0	0	0.3615	0	0	0	0	0	0	0	0	0	0	0	0
mmu-mir-712_60_79_+	60	79	............................................................GCGTCCGTGCGCCGATGCG..............................	19	GCGTCCGTGCGCCGATGCG	2	0.4867	0.00496633	0	0	0	0	0	0	0	0	0	0	0	0	0	0	0	0	0	0	0	0	0	0	0	0	0	0	0	0	0	0	0	0	0.3182	0	0	0	0	0	0	0	0
mmu-mir-712_66_91_+	66	91	..................................................................GTGCGCCGATGCGAGTCACCCCCGG..................	25	GTGCGCCGATGCGAGTCACCCCCGG	2	0.2881	0.0029398	0	0	0	0	0	0	0	0	0	0	0	0	0	0	0	0	0	0	0	0	0	0	0	0	0	0	0	0	0	0	0	0	0	0	0	0	0	0	0	0	0
mmu-mir-712_67_88_+	67	88	...................................................................TGCGCCGATGCGAGTCACCCC.....................	21	TGCGCCGATGCGAGTCACCCC	2	0.723	0.00737755	0	0	0	0	0	0	0	0	0	0	0	0	0	0	0	0	0	0	0	0	0	0	0	0	0	0	0	0	0.723	0	0	0	0	0	0	0	0	0	0	0	0
mmu-mir-712_68_88_+	68	88	....................................................................GCGCCGATGCGAGTCACCCC.....................	20	GCGCCGATGCGAGTCACCCC	2	0.3464	0.00353469	0	0	0	0	0	0	0	0	0	0	0	0	0	0	0	0	0	0	0	0	0	0	0	0	0	0	0	0	0	0	0	0	0	0	0	0	0	0	0	0	0
mmu-mir-712_69_89_+	69	89	.....................................................................CGCCGATGCGAGTCACCCCC....................	20	CGCCGATGCGAGTCACCCCC	2	0.3444	0.00351429	0	0	0	0	0	0	0	0	0	0	0	0	0	0	0	0	0	0	0	0	0	0	0	0	0	0	0	0	0	0	0	0	0	0	0	0	0	0	0	0	0
mmu-mir-712_71_89_+	71	89	.......................................................................CCGATGCGAGTCACCCCC....................	18	CCGATGCGAGTCACCCCC	2	0.0938	0.000957143	0	0	0	0	0	0	0	0.0938	0	0	0	0	0	0	0	0	0	0	0	0	0	0	0	0	0	0	0	0	0	0	0	0	0	0	0	0	0	0	0	0	0
mmu-mir-712_71_92_+	71	92	.......................................................................CCGATGCGAGTCACCCCCGGG.................	21	CCGATGCGAGTCACCCCCGGG	2	0.337	0.00343878	0	0	0	0	0	0	0	0	0	0	0	0	0	0	0	0	0	0	0	0	0	0	0	0	0	0	0	0	0	0	0	0	0	0	0	0	0	0	0	0	0
mmu-mir-712_72_95_+	72	95	........................................................................CGATGCGAGTCACCCCCGGGTGT..............	23	CGATGCGAGTCACCCCCGGGTGT	2	0.1959	0.00199898	0	0	0	0	0	0	0	0	0	0	0	0	0	0	0	0	0	0	0	0	0	0	0	0	0	0	0	0	0	0	0	0	0	0	0	0	0	0	0	0	0
mmu-mir-712_73_92_+	73	92	.........................................................................GATGCGAGTCACCCCCGGG.................	19	GATGCGAGTCACCCCCGGG	2	0.3166	0.00323061	0	0	0	0	0	0	0	0	0	0	0	0	0	0	0	0	0	0	0	0	0	0	0	0	0	0	0	0	0	0	0	0	0	0	0	0	0	0	0	0	0
mmu-mir-712_81_109_+	81	109	.................................................................................TCACCCCCGGGTGTTGCGAGTTCGGGGA	28	TCACCCCCGGGTGTTGCGAGTTCGGGGA	2	0.723	0.00737755	0	0	0	0	0	0	0	0	0	0	0	0	0	0	0	0	0	0	0	0	0	0	0	0	0	0	0	0	0.723	0	0	0	0	0	0	0	0	0	0	0	0
mmu-mir-712_82_105_+	82	105	..................................................................................CACCCCCGGGTGTTGCGAGTTCG....	23	CACCCCCGGGTGTTGCGAGTTCG	2	0.4922	0.00502245	0	0	0	0	0	0	0	0	0	0	0	0	0	0	0	0	0	0	0	0	0	0	0	0	0	0	0	0	0	0	0	0	0	0	0	0	0	0	0	0	0
mmu-mir-712_84_102_+	84	102	....................................................................................CCCCCGGGTGTTGCGAGT.......	18	CCCCCGGGTGTTGCGAGT	2	0.3464	0.00353469	0	0	0	0	0	0	0	0	0	0	0	0	0	0	0	0	0	0	0	0	0	0	0	0	0	0	0	0	0	0	0	0	0	0	0	0	0	0	0	0	0
mmu-mir-712_84_105_+	84	105	....................................................................................CCCCCGGGTGTTGCGAGTTCG....	21	CCCCCGGGTGTTGCGAGTTCG	2	0.1972	0.00201224	0	0	0	0	0	0	0	0	0.0491	0	0	0	0	0	0	0	0	0	0	0	0	0	0	0	0	0	0	0	0	0	0	0	0	0	0	0	0	0	0	0	0
mmu-mir-712_84_108_+	84	108	....................................................................................CCCCCGGGTGTTGCGAGTTCGGGG.	24	CCCCCGGGTGTTGCGAGTTCGGGG	2	0.5598	0.00571224	0	0	0	0	0	0	0	0	0	0	0	0	0	0	0	0	0	0	0	0	0	0	0	0	0	0	0	0	0.3615	0	0	0	0	0	0	0	0	0	0	0	0
mmu-mir-712_87_107_+	87	107	.......................................................................................CCGGGTGTTGCGAGTTCGGG..	20	CCGGGTGTTGCGAGTTCGGG	2	0.4663	0.00475816	0	0	0	0	0	0	0	0	0	0	0	0	0	0	0	0	0	0	0	0	0	0	0	0	0	0	0	0	0	0	0	0	0.3182	0	0	0	0	0	0	0	0
mmu-mir-712_87_108_+	87	108	.......................................................................................CCGGGTGTTGCGAGTTCGGGG.	21	CCGGGTGTTGCGAGTTCGGGG	2	0.2068	0.0021102	0.0607	0	0	0	0	0	0	0	0	0	0	0	0	0	0	0	0	0	0	0	0	0	0	0	0	0	0	0	0	0	0	0	0	0	0	0	0	0	0	0	0
mmu-mir-712_0_18_+	0	18	TCTCCGCTTCTCCTTCAC...........................................................................................	18	TCTCCGCTTCTCCTTCAC	1	0.1126	0.00114898	0	0	0	0	0	0	0	0	0	0	0	0	0	0	0	0	0	0	0	0	0	0	0	0	0	0	0	0	0	0	0	0	0	0	0	0	0	0	0	0	0
mmu-mir-712_0_24_+	0	24	TCTCCGCTTCTCCTTCACCCGGGC.....................................................................................	24	TCTCCGCTTCTCCTTCACCCGGGC	1	0.0469	0.000478571	0	0	0	0	0.0469	0	0	0	0	0	0	0	0	0	0	0	0	0	0	0	0	0	0	0	0	0	0	0	0	0	0	0	0	0	0	0	0	0	0	0	0
mmu-mir-712_0_25_+	0	25	TCTCCGCTTCTCCTTCACCCGGGCG....................................................................................	25	TCTCCGCTTCTCCTTCACCCGGGCG	1	0.3615	0.00368878	0	0	0	0	0	0	0	0	0	0	0	0	0	0	0	0	0	0	0	0	0	0	0	0	0	0	0	0	0.3615	0	0	0	0	0	0	0	0	0	0	0	0
mmu-mir-712_1_20_+	1	20	.CTCCGCTTCTCCTTCACCC.........................................................................................	19	CTCCGCTTCTCCTTCACCC	1	0.0539	0.00055	0	0	0	0.0539	0	0	0	0	0	0	0	0	0	0	0	0	0	0	0	0	0	0	0	0	0	0	0	0	0	0	0	0	0	0	0	0	0	0	0	0	0
mmu-mir-712_1_21_+	1	21	.CTCCGCTTCTCCTTCACCCG........................................................................................	20	CTCCGCTTCTCCTTCACCCG	1	0.0539	0.00055	0	0	0	0.0539	0	0	0	0	0	0	0	0	0	0	0	0	0	0	0	0	0	0	0	0	0	0	0	0	0	0	0	0	0	0	0	0	0	0	0	0	0
mmu-mir-712_1_28_+	1	28	.CTCCGCTTCTCCTTCACCCGGGCGGTA.................................................................................	27	CTCCGCTTCTCCTTCACCCGGGCGGTA	1	0.0469	0.000478571	0	0	0	0	0	0	0	0.0469	0	0	0	0	0	0	0	0	0	0	0	0	0	0	0	0	0	0	0	0	0	0	0	0	0	0	0	0	0	0	0	0	0
mmu-mir-712_4_26_+	4	26	....CGCTTCTCCTTCACCCGGGCGG...................................................................................	22	CGCTTCTCCTTCACCCGGGCGG	1	0.3615	0.00368878	0	0	0	0	0	0	0	0	0	0	0	0	0	0	0	0	0	0	0	0	0	0	0	0	0	0	0	0	0.3615	0	0	0	0	0	0	0	0	0	0	0	0
mmu-mir-712_5_23_+	5	23	.....GCTTCTCCTTCACCCGGG......................................................................................	18	GCTTCTCCTTCACCCGGG	1	0.0491	0.00050102	0	0	0	0	0	0	0	0	0.0491	0	0	0	0	0	0	0	0	0	0	0	0	0	0	0	0	0	0	0	0	0	0	0	0	0	0	0	0	0	0	0	0
mmu-mir-712_5_24_+	5	24	.....GCTTCTCCTTCACCCGGGC.....................................................................................	19	GCTTCTCCTTCACCCGGGC	1	0.1461	0.00149082	0	0	0	0	0	0	0	0	0	0	0	0	0	0	0	0	0	0	0	0	0	0	0	0	0	0	0	0	0	0	0	0	0	0	0	0	0	0	0	0	0
mmu-mir-712_5_33_+	5	33	.....GCTTCTCCTTCACCCGGGCGGTACCCGC............................................................................	28	GCTTCTCCTTCACCCGGGCGGTACCCGC	1	0.0469	0.000478571	0	0	0	0	0	0	0	0.0469	0	0	0	0	0	0	0	0	0	0	0	0	0	0	0	0	0	0	0	0	0	0	0	0	0	0	0	0	0	0	0	0	0
mmu-mir-712_6_30_+	6	30	......CTTCTCCTTCACCCGGGCGGTACC...............................................................................	24	CTTCTCCTTCACCCGGGCGGTACC	1	0.0469	0.000478571	0	0	0	0	0	0	0	0.0469	0	0	0	0	0	0	0	0	0	0	0	0	0	0	0	0	0	0	0	0	0	0	0	0	0	0	0	0	0	0	0	0	0
mmu-mir-712_6_35_+	6	35	......CTTCTCCTTCACCCGGGCGGTACCCGCTC..........................................................................	29	CTTCTCCTTCACCCGGGCGGTACCCGCTC	1	0.0539	0.00055	0	0	0	0.0539	0	0	0	0	0	0	0	0	0	0	0	0	0	0	0	0	0	0	0	0	0	0	0	0	0	0	0	0	0	0	0	0	0	0	0	0	0
mmu-mir-712_7_33_+	7	33	.......TTCTCCTTCACCCGGGCGGTACCCGC............................................................................	26	TTCTCCTTCACCCGGGCGGTACCCGC	1	0.1675	0.00170918	0	0	0	0	0	0	0	0	0	0	0	0	0	0	0	0	0	0	0	0	0	0	0	0	0	0	0	0	0	0	0	0	0	0	0	0	0	0	0	0	0
mmu-mir-712_11_37_+	11	37	...........CCTTCACCCGGGCGGTACCCGCTCCG........................................................................	26	CCTTCACCCGGGCGGTACCCGCTCCG	1	0.1126	0.00114898	0	0	0	0	0	0	0	0	0	0	0	0	0	0	0	0	0	0	0	0	0	0	0	0	0	0	0	0	0	0	0	0	0	0	0	0	0	0	0	0	0
mmu-mir-712_12_37_+	12	37	............CTTCACCCGGGCGGTACCCGCTCCG........................................................................	25	CTTCACCCGGGCGGTACCCGCTCCG	1	0.0469	0.000478571	0	0	0	0	0.0469	0	0	0	0	0	0	0	0	0	0	0	0	0	0	0	0	0	0	0	0	0	0	0	0	0	0	0	0	0	0	0	0	0	0	0	0
mmu-mir-712_12_39_+	12	39	............CTTCACCCGGGCGGTACCCGCTCCGGC......................................................................	27	CTTCACCCGGGCGGTACCCGCTCCGGC	1	0.0494	0.000504082	0	0.0494	0	0	0	0	0	0	0	0	0	0	0	0	0	0	0	0	0	0	0	0	0	0	0	0	0	0	0	0	0	0	0	0	0	0	0	0	0	0	0
mmu-mir-712_12_42_+	12	42	............CTTCACCCGGGCGGTACCCGCTCCGGCGCC...................................................................	30	CTTCACCCGGGCGGTACCCGCTCCGGCGCC	1	0.0617	0.000629592	0	0	0.0617	0	0	0	0	0	0	0	0	0	0	0	0	0	0	0	0	0	0	0	0	0	0	0	0	0	0	0	0	0	0	0	0	0	0	0	0	0	0
mmu-mir-712_13_43_+	13	43	.............TTCACCCGGGCGGTACCCGCTCCGGCGCCG..................................................................	30	TTCACCCGGGCGGTACCCGCTCCGGCGCCG	1	0.0469	0.000478571	0	0	0	0	0	0	0	0.0469	0	0	0	0	0	0	0	0	0	0	0	0	0	0	0	0	0	0	0	0	0	0	0	0	0	0	0	0	0	0	0	0	0
mmu-mir-712_14_39_+	14	39	..............TCACCCGGGCGGTACCCGCTCCGGC......................................................................	25	TCACCCGGGCGGTACCCGCTCCGGC	1	0.104	0.00106122	0	0	0	0	0	0	0	0	0	0	0	0	0	0	0	0	0	0	0	0	0	0	0	0	0	0	0	0	0	0	0	0	0	0	0	0	0	0	0	0	0
mmu-mir-712_14_41_+	14	41	..............TCACCCGGGCGGTACCCGCTCCGGCGC....................................................................	27	TCACCCGGGCGGTACCCGCTCCGGCGC	1	0.0919	0.000937755	0	0	0	0	0	0	0	0	0	0	0	0	0	0	0	0	0	0	0	0	0	0	0	0	0	0	0	0	0	0	0	0	0	0	0	0	0	0	0	0	0
mmu-mir-712_16_38_+	16	38	................ACCCGGGCGGTACCCGCTCCGG.......................................................................	22	ACCCGGGCGGTACCCGCTCCGG	1	0.3247	0.00331327	0	0	0	0	0	0	0	0	0	0	0	0	0	0	0	0	0	0	0	0	0	0	0	0	0	0	0	0	0	0	0	0	0	0	0	0	0	0	0	0	0
mmu-mir-712_16_39_+	16	39	................ACCCGGGCGGTACCCGCTCCGGC......................................................................	23	ACCCGGGCGGTACCCGCTCCGGC	1	0.0919	0.000937755	0	0	0	0	0	0	0	0	0	0	0	0	0	0	0	0	0	0	0	0	0	0	0	0	0	0	0	0	0	0	0	0	0	0	0	0	0	0	0	0	0
mmu-mir-712_17_39_+	17	39	.................CCCGGGCGGTACCCGCTCCGGC......................................................................	22	CCCGGGCGGTACCCGCTCCGGC	1	0.0539	0.00055	0	0	0	0.0539	0	0	0	0	0	0	0	0	0	0	0	0	0	0	0	0	0	0	0	0	0	0	0	0	0	0	0	0	0	0	0	0	0	0	0	0	0
mmu-mir-712_18_41_+	18	41	..................CCGGGCGGTACCCGCTCCGGCGC....................................................................	23	CCGGGCGGTACCCGCTCCGGCGC	1	2.7456	0.0280163	0	0	0	0	0	0	0	0	0	0	0	0	0	0	0	0	0	0	0	0	0	2.7456	0	0	0	0	0	0	0	0	0	0	0	0	0	0	0	0	0	0	0
mmu-mir-712_20_39_+	20	39	....................GGGCGGTACCCGCTCCGGC......................................................................	19	GGGCGGTACCCGCTCCGGC	1	0.3247	0.00331327	0	0	0	0	0	0	0	0	0	0	0	0	0	0	0	0	0	0	0	0	0	0	0	0	0	0	0	0	0	0	0	0	0	0	0	0	0	0	0	0	0
mmu-mir-712_20_43_+	20	43	....................GGGCGGTACCCGCTCCGGCGCCG..................................................................	23	GGGCGGTACCCGCTCCGGCGCCG	1	0.4247	0.00433367	0	0	0	0	0	0	0	0	0	0	0	0	0	0	0	0	0	0	0	0	0	0	0	0	0	0	0	0	0	0	0	0	0	0	0	0	0	0	0	0	0
mmu-mir-712_20_47_+	20	47	....................GGGCGGTACCCGCTCCGGCGCCGGCCC..............................................................	27	GGGCGGTACCCGCTCCGGCGCCGGCCC	1	0.0469	0.000478571	0	0	0	0	0	0	0	0.0469	0	0	0	0	0	0	0	0	0	0	0	0	0	0	0	0	0	0	0	0	0	0	0	0	0	0	0	0	0	0	0	0	0
mmu-mir-712_21_45_+	21	45	.....................GGCGGTACCCGCTCCGGCGCCGGC................................................................	24	GGCGGTACCCGCTCCGGCGCCGGC	1	0.0617	0.000629592	0	0	0.0617	0	0	0	0	0	0	0	0	0	0	0	0	0	0	0	0	0	0	0	0	0	0	0	0	0	0	0	0	0	0	0	0	0	0	0	0	0	0
mmu-mir-712_22_41_+	22	41	......................GCGGTACCCGCTCCGGCGC....................................................................	19	GCGGTACCCGCTCCGGCGC	1	0.1675	0.00170918	0	0	0	0	0	0	0	0	0	0	0	0	0	0	0	0	0	0	0	0	0	0	0	0	0	0	0	0	0	0	0	0	0	0	0	0	0	0	0	0	0
mmu-mir-712_22_52_+	22	52	......................GCGGTACCCGCTCCGGCGCCGGCCCGCGGG.........................................................	30	GCGGTACCCGCTCCGGCGCCGGCCCGCGGG	1	0.0491	0.00050102	0	0	0	0	0	0	0	0	0.0491	0	0	0	0	0	0	0	0	0	0	0	0	0	0	0	0	0	0	0	0	0	0	0	0	0	0	0	0	0	0	0	0
mmu-mir-712_23_53_+	23	53	.......................CGGTACCCGCTCCGGCGCCGGCCCGCGGGA........................................................	30	CGGTACCCGCTCCGGCGCCGGCCCGCGGGA	1	0.0469	0.000478571	0	0	0	0	0	0	0	0.0469	0	0	0	0	0	0	0	0	0	0	0	0	0	0	0	0	0	0	0	0	0	0	0	0	0	0	0	0	0	0	0	0	0
mmu-mir-712_24_45_+	24	45	........................GGTACCCGCTCCGGCGCCGGC................................................................	21	GGTACCCGCTCCGGCGCCGGC	1	0.104	0.00106122	0	0	0	0	0	0	0	0	0	0	0	0	0	0	0	0	0	0	0	0	0	0	0	0	0	0	0	0	0	0	0	0	0	0	0	0	0	0	0	0	0
mmu-mir-712_24_46_+	24	46	........................GGTACCCGCTCCGGCGCCGGCC...............................................................	22	GGTACCCGCTCCGGCGCCGGCC	1	0.1461	0.00149082	0	0	0	0	0	0	0	0	0	0	0	0	0	0	0	0	0	0	0	0	0	0	0	0	0	0	0	0	0	0	0	0	0	0	0	0	0	0	0	0	0
mmu-mir-712_24_47_+	24	47	........................GGTACCCGCTCCGGCGCCGGCCC..............................................................	23	GGTACCCGCTCCGGCGCCGGCCC	1	0.0469	0.000478571	0	0	0	0	0	0	0	0.0469	0	0	0	0	0	0	0	0	0	0	0	0	0	0	0	0	0	0	0	0	0	0	0	0	0	0	0	0	0	0	0	0	0
mmu-mir-712_24_49_+	24	49	........................GGTACCCGCTCCGGCGCCGGCCCGC............................................................	25	GGTACCCGCTCCGGCGCCGGCCCGC	1	0.1685	0.00171939	0	0	0	0	0	0	0	0	0	0	0	0	0	0	0	0	0	0	0	0	0	0	0	0	0	0	0	0	0	0	0	0	0	0	0	0	0	0	0	0	0
mmu-mir-712_24_51_+	24	51	........................GGTACCCGCTCCGGCGCCGGCCCGCGG..........................................................	27	GGTACCCGCTCCGGCGCCGGCCCGCGG	1	0.2039	0.00208061	0	0	0	0	0	0	0	0	0	0	0	0	0	0	0	0	0	0	0	0	0	0	0	0	0	0	0	0	0	0	0	0	0	0	0	0.2039	0	0	0	0	0
mmu-mir-712_25_44_+	25	44	.........................GTACCCGCTCCGGCGCCGG.................................................................	19	GTACCCGCTCCGGCGCCGG	1	0.0469	0.000478571	0	0	0	0	0	0	0	0.0469	0	0	0	0	0	0	0	0	0	0	0	0	0	0	0	0	0	0	0	0	0	0	0	0	0	0	0	0	0	0	0	0	0
mmu-mir-712_25_45_+	25	45	.........................GTACCCGCTCCGGCGCCGGC................................................................	20	GTACCCGCTCCGGCGCCGGC	1	0.1461	0.00149082	0	0	0	0	0	0	0	0	0	0	0	0	0	0	0	0	0	0	0	0	0	0	0	0	0	0	0	0	0	0	0	0	0	0	0	0	0	0	0	0	0
mmu-mir-712_25_49_+	25	49	.........................GTACCCGCTCCGGCGCCGGCCCGC............................................................	24	GTACCCGCTCCGGCGCCGGCCCGC	1	0.3999	0.00408061	0	0	0	0	0	0	0	0	0	0	0	0	0	0	0	0	0	0	0	0	0	0	0	0	0	0	0	0	0	0	0	0	0	0	0	0	0	0	0	0	0
mmu-mir-712_25_51_+	25	51	.........................GTACCCGCTCCGGCGCCGGCCCGCGG..........................................................	26	GTACCCGCTCCGGCGCCGGCCCGCGG	1	0.1461	0.00149082	0	0	0	0	0	0	0	0	0	0	0	0	0	0	0	0	0	0	0	0	0	0	0	0	0	0	0	0	0	0	0	0	0	0	0	0	0	0	0	0	0
mmu-mir-712_25_52_+	25	52	.........................GTACCCGCTCCGGCGCCGGCCCGCGGG.........................................................	27	GTACCCGCTCCGGCGCCGGCCCGCGGG	1	0.104	0.00106122	0	0	0	0	0	0	0	0	0	0	0	0	0	0	0	0	0	0	0	0	0	0	0	0	0	0	0	0	0	0	0	0	0	0	0	0	0	0	0	0	0
mmu-mir-712_27_55_+	27	55	...........................ACCCGCTCCGGCGCCGGCCCGCGGGACG......................................................	28	ACCCGCTCCGGCGCCGGCCCGCGGGACG	1	0.104	0.00106122	0	0	0	0	0	0	0	0	0	0	0	0	0	0	0	0	0	0	0	0	0	0	0	0	0	0	0	0	0	0	0	0	0	0	0	0	0	0	0	0	0
mmu-mir-712_27_56_+	27	56	...........................ACCCGCTCCGGCGCCGGCCCGCGGGACGC.....................................................	29	ACCCGCTCCGGCGCCGGCCCGCGGGACGC	1	0.1983	0.00202347	0	0	0	0	0	0	0	0	0	0	0	0	0	0	0	0	0	0	0	0	0	0	0	0	0	0	0	0	0	0	0	0	0	0	0	0	0	0	0	0	0
mmu-mir-712_30_51_+	30	51	..............................CGCTCCGGCGCCGGCCCGCGG..........................................................	21	CGCTCCGGCGCCGGCCCGCGG	1	0.0924	0.000942857	0	0	0	0	0	0	0	0	0	0	0	0	0	0	0	0	0	0	0	0	0	0	0	0	0	0	0	0	0	0	0	0	0	0	0	0	0	0	0	0	0
mmu-mir-712_30_52_+	30	52	..............................CGCTCCGGCGCCGGCCCGCGGG.........................................................	22	CGCTCCGGCGCCGGCCCGCGGG	1	0.0617	0.000629592	0	0	0.0617	0	0	0	0	0	0	0	0	0	0	0	0	0	0	0	0	0	0	0	0	0	0	0	0	0	0	0	0	0	0	0	0	0	0	0	0	0	0
mmu-mir-712_30_57_+	30	57	..............................CGCTCCGGCGCCGGCCCGCGGGACGCC....................................................	27	CGCTCCGGCGCCGGCCCGCGGGACGCC	1	0.0491	0.00050102	0	0	0	0	0	0	0	0	0.0491	0	0	0	0	0	0	0	0	0	0	0	0	0	0	0	0	0	0	0	0	0	0	0	0	0	0	0	0	0	0	0	0
mmu-mir-712_32_54_+	32	54	................................CTCCGGCGCCGGCCCGCGGGAC.......................................................	22	CTCCGGCGCCGGCCCGCGGGAC	1	0.059	0.000602041	0	0	0	0	0	0	0	0	0	0	0	0	0	0	0	0	0	0	0	0	0	0	0	0	0	0	0	0	0	0	0	0	0	0	0	0	0	0	0	0	0
mmu-mir-712_32_56_+	32	56	................................CTCCGGCGCCGGCCCGCGGGACGC.....................................................	24	CTCCGGCGCCGGCCCGCGGGACGC	1	0.0469	0.000478571	0	0	0	0	0	0	0	0.0469	0	0	0	0	0	0	0	0	0	0	0	0	0	0	0	0	0	0	0	0	0	0	0	0	0	0	0	0	0	0	0	0	0
mmu-mir-712_32_60_+	32	60	................................CTCCGGCGCCGGCCCGCGGGACGCCGCG.................................................	28	CTCCGGCGCCGGCCCGCGGGACGCCGCG	1	0.0469	0.000478571	0	0	0	0	0	0	0	0.0469	0	0	0	0	0	0	0	0	0	0	0	0	0	0	0	0	0	0	0	0	0	0	0	0	0	0	0	0	0	0	0	0	0
mmu-mir-712_33_56_+	33	56	.................................TCCGGCGCCGGCCCGCGGGACGC.....................................................	23	TCCGGCGCCGGCCCGCGGGACGC	1	0.0103	0.000105102	0	0	0	0	0	0	0	0	0	0	0	0	0	0	0	0	0	0	0	0	0	0	0	0	0	0	0	0	0	0	0	0	0	0	0	0	0	0	0	0	0
mmu-mir-712_33_58_+	33	58	.................................TCCGGCGCCGGCCCGCGGGACGCCG...................................................	25	TCCGGCGCCGGCCCGCGGGACGCCG	1	0.1675	0.00170918	0	0	0	0	0	0	0	0	0	0	0	0	0	0	0	0	0	0	0	0	0	0	0	0	0	0	0	0	0	0	0	0	0	0	0	0	0	0	0	0	0
mmu-mir-712_34_55_+	34	55	..................................CCGGCGCCGGCCCGCGGGACG......................................................	21	CCGGCGCCGGCCCGCGGGACG	1	0.1126	0.00114898	0	0	0	0	0	0	0	0	0	0	0	0	0	0	0	0	0	0	0	0	0	0	0	0	0	0	0	0	0	0	0	0	0	0	0	0	0	0	0	0	0
mmu-mir-712_34_58_+	34	58	..................................CCGGCGCCGGCCCGCGGGACGCCG...................................................	24	CCGGCGCCGGCCCGCGGGACGCCG	1	0.0491	0.00050102	0	0	0	0	0	0	0	0	0.0491	0	0	0	0	0	0	0	0	0	0	0	0	0	0	0	0	0	0	0	0	0	0	0	0	0	0	0	0	0	0	0	0
mmu-mir-712_34_61_+	34	61	..................................CCGGCGCCGGCCCGCGGGACGCCGCGG................................................	27	CCGGCGCCGGCCCGCGGGACGCCGCGG	1	0.0607	0.000619388	0.0607	0	0	0	0	0	0	0	0	0	0	0	0	0	0	0	0	0	0	0	0	0	0	0	0	0	0	0	0	0	0	0	0	0	0	0	0	0	0	0	0
mmu-mir-712_34_63_+	34	63	..................................CCGGCGCCGGCCCGCGGGACGCCGCGGCG..............................................	29	CCGGCGCCGGCCCGCGGGACGCCGCGGCG	1	0.0469	0.000478571	0	0	0	0	0	0	0	0.0469	0	0	0	0	0	0	0	0	0	0	0	0	0	0	0	0	0	0	0	0	0	0	0	0	0	0	0	0	0	0	0	0	0
mmu-mir-712_36_56_+	36	56	....................................GGCGCCGGCCCGCGGGACGC.....................................................	20	GGCGCCGGCCCGCGGGACGC	1	0.0103	0.000105102	0	0	0	0	0	0	0	0	0	0	0	0	0	0	0	0	0	0	0	0	0	0	0	0	0	0	0	0	0	0	0	0	0	0	0	0	0	0	0	0	0
mmu-mir-712_36_57_+	36	57	....................................GGCGCCGGCCCGCGGGACGCC....................................................	21	GGCGCCGGCCCGCGGGACGCC	1	0.1983	0.00202347	0	0	0	0	0	0	0	0	0	0	0	0	0	0	0	0	0	0	0	0	0	0	0	0	0	0	0	0	0	0	0	0	0	0	0	0	0	0	0	0	0
mmu-mir-712_40_67_+	40	67	........................................CCGGCCCGCGGGACGCCGCGGCGTCCG..........................................	27	CCGGCCCGCGGGACGCCGCGGCGTCCG	1	0.1461	0.00149082	0	0	0	0	0	0	0	0	0	0	0	0	0	0	0	0	0	0	0	0	0	0	0	0	0	0	0	0	0	0	0	0	0	0	0	0	0	0	0	0	0
mmu-mir-712_42_60_+	42	60	..........................................GGCCCGCGGGACGCCGCG.................................................	18	GGCCCGCGGGACGCCGCG	1	0.0469	0.000478571	0	0	0	0	0	0	0	0.0469	0	0	0	0	0	0	0	0	0	0	0	0	0	0	0	0	0	0	0	0	0	0	0	0	0	0	0	0	0	0	0	0	0
mmu-mir-712_42_66_+	42	66	..........................................GGCCCGCGGGACGCCGCGGCGTCC...........................................	24	GGCCCGCGGGACGCCGCGGCGTCC	1	0.0469	0.000478571	0	0	0	0	0	0	0	0.0469	0	0	0	0	0	0	0	0	0	0	0	0	0	0	0	0	0	0	0	0	0	0	0	0	0	0	0	0	0	0	0	0	0
mmu-mir-712_43_65_+	43	65	...........................................GCCCGCGGGACGCCGCGGCGTC............................................	22	GCCCGCGGGACGCCGCGGCGTC	1	0.7304	0.00745306	0	0	0	0	0	0	0	0	0	0	0	0	0	0	0	0	0	0	0	0	0	0	0	0.7304	0	0	0	0	0	0	0	0	0	0	0	0	0	0	0	0	0
mmu-mir-712_43_66_+	43	66	...........................................GCCCGCGGGACGCCGCGGCGTCC...........................................	23	GCCCGCGGGACGCCGCGGCGTCC	1	0.7304	0.00745306	0	0	0	0	0	0	0	0	0	0	0	0	0	0	0	0	0	0	0	0	0	0	0	0.7304	0	0	0	0	0	0	0	0	0	0	0	0	0	0	0	0	0
mmu-mir-712_43_70_+	43	70	...........................................GCCCGCGGGACGCCGCGGCGTCCGTGC.......................................	27	GCCCGCGGGACGCCGCGGCGTCCGTGC	1	0.0494	0.000504082	0	0.0494	0	0	0	0	0	0	0	0	0	0	0	0	0	0	0	0	0	0	0	0	0	0	0	0	0	0	0	0	0	0	0	0	0	0	0	0	0	0	0
mmu-mir-712_44_62_+	44	62	............................................CCCGCGGGACGCCGCGGC...............................................	18	CCCGCGGGACGCCGCGGC	1	0.1062	0.00108367	0	0	0	0	0	0	0	0	0	0	0	0	0	0	0	0	0	0	0	0	0	0	0	0	0	0	0	0	0	0	0	0	0	0	0	0	0	0	0	0	0
mmu-mir-712_44_64_+	44	64	............................................CCCGCGGGACGCCGCGGCGT.............................................	20	CCCGCGGGACGCCGCGGCGT	1	0.1983	0.00202347	0	0	0	0	0	0	0	0	0	0	0	0	0	0	0	0	0	0	0	0	0	0	0	0	0	0	0	0	0	0	0	0	0	0	0	0	0	0	0	0	0
mmu-mir-712_44_65_+	44	65	............................................CCCGCGGGACGCCGCGGCGTC............................................	21	CCCGCGGGACGCCGCGGCGTC	1	0.1675	0.00170918	0	0	0	0	0	0	0	0	0	0	0	0	0	0	0	0	0	0	0	0	0	0	0	0	0	0	0	0	0	0	0	0	0	0	0	0	0	0	0	0	0
mmu-mir-712_45_64_+	45	64	.............................................CCGCGGGACGCCGCGGCGT.............................................	19	CCGCGGGACGCCGCGGCGT	1	1.1943	0.0121867	0	0	0	0	0	0	0	0	0	0	0	0	0	0	0	0	0	0	0	0	0	0	0	0	0	0	0	0	0	0	0	0	0	0	0	0	0	0	0	0	0
mmu-mir-712_45_71_+	45	71	.............................................CCGCGGGACGCCGCGGCGTCCGTGCG......................................	26	CCGCGGGACGCCGCGGCGTCCGTGCG	1	0.1983	0.00202347	0	0	0	0	0	0	0	0	0	0	0	0	0	0	0	0	0	0	0	0	0	0	0	0	0	0	0	0	0	0	0	0	0	0	0	0	0	0	0	0	0
mmu-mir-712_48_66_+	48	66	................................................CGGGACGCCGCGGCGTCC...........................................	18	CGGGACGCCGCGGCGTCC	1	0.0469	0.000478571	0	0	0	0	0	0	0	0.0469	0	0	0	0	0	0	0	0	0	0	0	0	0	0	0	0	0	0	0	0	0	0	0	0	0	0	0	0	0	0	0	0	0
mmu-mir-712_48_71_+	48	71	................................................CGGGACGCCGCGGCGTCCGTGCG......................................	23	CGGGACGCCGCGGCGTCCGTGCG	1	0.3615	0.00368878	0	0	0	0	0	0	0	0	0	0	0	0	0	0	0	0	0	0	0	0	0	0	0	0	0	0	0	0	0.3615	0	0	0	0	0	0	0	0	0	0	0	0
mmu-mir-712_48_74_+	48	74	................................................CGGGACGCCGCGGCGTCCGTGCGCCG...................................	26	CGGGACGCCGCGGCGTCCGTGCGCCG	1	0.1983	0.00202347	0	0	0	0	0	0	0	0	0	0	0	0	0	0	0	0	0	0	0	0	0	0	0	0	0	0	0	0	0	0	0	0	0	0	0	0	0	0	0	0	0
mmu-mir-712_49_67_+	49	67	.................................................GGGACGCCGCGGCGTCCG..........................................	18	GGGACGCCGCGGCGTCCG	1	0.1461	0.00149082	0	0	0	0	0	0	0	0	0	0	0	0	0	0	0	0	0	0	0	0	0	0	0	0	0	0	0	0	0	0	0	0	0	0	0	0	0	0	0	0	0
mmu-mir-712_49_78_+	49	78	.................................................GGGACGCCGCGGCGTCCGTGCGCCGATGC...............................	29	GGGACGCCGCGGCGTCCGTGCGCCGATGC	1	0.1062	0.00108367	0	0	0	0	0	0	0	0	0	0	0	0	0	0	0	0	0	0	0	0	0	0	0	0	0	0	0	0	0	0	0	0	0	0	0	0	0	0	0	0	0
mmu-mir-712_50_75_+	50	75	..................................................GGACGCCGCGGCGTCCGTGCGCCGA..................................	25	GGACGCCGCGGCGTCCGTGCGCCGA	1	0.0469	0.000478571	0	0	0	0	0	0	0	0.0469	0	0	0	0	0	0	0	0	0	0	0	0	0	0	0	0	0	0	0	0	0	0	0	0	0	0	0	0	0	0	0	0	0
mmu-mir-712_51_73_+	51	73	...................................................GACGCCGCGGCGTCCGTGCGCC....................................	22	GACGCCGCGGCGTCCGTGCGCC	1	0.1675	0.00170918	0	0	0	0	0	0	0	0	0	0	0	0	0	0	0	0	0	0	0	0	0	0	0	0	0	0	0	0	0	0	0	0	0	0	0	0	0	0	0	0	0
mmu-mir-712_51_74_+	51	74	...................................................GACGCCGCGGCGTCCGTGCGCCG...................................	23	GACGCCGCGGCGTCCGTGCGCCG	1	0.4247	0.00433367	0	0	0	0	0	0	0	0	0	0	0	0	0	0	0	0	0	0	0	0	0	0	0	0	0	0	0	0	0	0	0	0	0	0	0	0	0	0	0	0	0
mmu-mir-712_52_71_+	52	71	....................................................ACGCCGCGGCGTCCGTGCG......................................	19	ACGCCGCGGCGTCCGTGCG	1	0.1675	0.00170918	0	0	0	0	0	0	0	0	0	0	0	0	0	0	0	0	0	0	0	0	0	0	0	0	0	0	0	0	0	0	0	0	0	0	0	0	0	0	0	0	0
mmu-mir-712_53_78_+	53	78	.....................................................CGCCGCGGCGTCCGTGCGCCGATGC...............................	25	CGCCGCGGCGTCCGTGCGCCGATGC	1	0.0494	0.000504082	0	0.0494	0	0	0	0	0	0	0	0	0	0	0	0	0	0	0	0	0	0	0	0	0	0	0	0	0	0	0	0	0	0	0	0	0	0	0	0	0	0	0
mmu-mir-712_54_76_+	54	76	......................................................GCCGCGGCGTCCGTGCGCCGAT.................................	22	GCCGCGGCGTCCGTGCGCCGAT	1	0.0469	0.000478571	0	0	0	0	0	0	0	0.0469	0	0	0	0	0	0	0	0	0	0	0	0	0	0	0	0	0	0	0	0	0	0	0	0	0	0	0	0	0	0	0	0	0
mmu-mir-712_54_78_+	54	78	......................................................GCCGCGGCGTCCGTGCGCCGATGC...............................	24	GCCGCGGCGTCCGTGCGCCGATGC	1	0.1675	0.00170918	0	0	0	0	0	0	0	0	0	0	0	0	0	0	0	0	0	0	0	0	0	0	0	0	0	0	0	0	0	0	0	0	0	0	0	0	0	0	0	0	0
mmu-mir-712_55_75_+	55	75	.......................................................CCGCGGCGTCCGTGCGCCGA..................................	20	CCGCGGCGTCCGTGCGCCGA	1	0.9094	0.00927959	0	0	0	0	0	0	0	0	0	0	0	0	0	0	0.9094	0	0	0	0	0	0	0	0	0	0	0	0	0	0	0	0	0	0	0	0	0	0	0	0	0	0
mmu-mir-712_55_77_+	55	77	.......................................................CCGCGGCGTCCGTGCGCCGATG................................	22	CCGCGGCGTCCGTGCGCCGATG	1	2.7456	0.0280163	0	0	0	0	0	0	0	0	0	0	0	0	0	0	0	0	0	0	0	0	0	2.7456	0	0	0	0	0	0	0	0	0	0	0	0	0	0	0	0	0	0	0
mmu-mir-712_56_76_+	56	76	........................................................CGCGGCGTCCGTGCGCCGAT.................................	20	CGCGGCGTCCGTGCGCCGAT	1	0.3247	0.00331327	0	0	0	0	0	0	0	0	0	0	0	0	0	0	0	0	0	0	0	0	0	0	0	0	0	0	0	0	0	0	0	0	0	0	0	0	0	0	0	0	0
mmu-mir-712_57_77_+	57	77	.........................................................GCGGCGTCCGTGCGCCGATG................................	20	GCGGCGTCCGTGCGCCGATG	1	0.1675	0.00170918	0	0	0	0	0	0	0	0	0	0	0	0	0	0	0	0	0	0	0	0	0	0	0	0	0	0	0	0	0	0	0	0	0	0	0	0	0	0	0	0	0
mmu-mir-712_57_78_+	57	78	.........................................................GCGGCGTCCGTGCGCCGATGC...............................	21	GCGGCGTCCGTGCGCCGATGC	1	0.1983	0.00202347	0	0	0	0	0	0	0	0	0	0	0	0	0	0	0	0	0	0	0	0	0	0	0	0	0	0	0	0	0	0	0	0	0	0	0	0	0	0	0	0	0
mmu-mir-712_57_79_+	57	79	.........................................................GCGGCGTCCGTGCGCCGATGCG..............................	22	GCGGCGTCCGTGCGCCGATGCG	1	0.1685	0.00171939	0	0	0	0	0	0	0	0	0	0	0	0	0	0	0	0	0	0	0	0	0	0	0	0	0	0	0	0	0	0	0	0	0	0	0	0	0	0	0	0	0
mmu-mir-712_58_78_+	58	78	..........................................................CGGCGTCCGTGCGCCGATGC...............................	20	CGGCGTCCGTGCGCCGATGC	1	0.3182	0.00324694	0	0	0	0	0	0	0	0	0	0	0	0	0	0	0	0	0	0	0	0	0	0	0	0	0	0	0	0	0	0	0	0	0.3182	0	0	0	0	0	0	0	0
mmu-mir-712_58_83_+	58	83	..........................................................CGGCGTCCGTGCGCCGATGCGAGTC..........................	25	CGGCGTCCGTGCGCCGATGCGAGTC	1	0.08	0.000816327	0	0	0	0	0	0	0	0	0	0	0	0	0	0	0	0	0	0	0	0	0	0	0	0	0	0	0	0	0	0	0	0	0	0	0	0	0	0	0	0	0
mmu-mir-712_59_78_+	59	78	...........................................................GGCGTCCGTGCGCCGATGC...............................	19	GGCGTCCGTGCGCCGATGC	1	0.1481	0.00151122	0	0	0	0	0	0	0	0	0	0	0	0	0	0	0	0	0	0	0	0	0	0	0	0	0	0	0	0	0	0	0	0	0	0	0	0	0	0	0	0	0
mmu-mir-712_59_87_+	59	87	...........................................................GGCGTCCGTGCGCCGATGCGAGTCACCC......................	28	GGCGTCCGTGCGCCGATGCGAGTCACCC	1	0.1983	0.00202347	0	0	0	0	0	0	0	0	0	0	0	0	0	0	0	0	0	0	0	0	0	0	0	0	0	0	0	0	0	0	0	0	0	0	0	0	0	0	0	0	0
mmu-mir-712_59_89_+	59	89	...........................................................GGCGTCCGTGCGCCGATGCGAGTCACCCCC....................	30	GGCGTCCGTGCGCCGATGCGAGTCACCCCC	1	0.1481	0.00151122	0	0	0	0	0	0	0	0	0	0	0	0	0	0	0	0	0	0	0	0	0	0	0	0	0	0	0	0	0	0	0	0	0	0	0	0	0	0	0	0	0
mmu-mir-712_60_80_+	60	80	............................................................GCGTCCGTGCGCCGATGCGA.............................	20	GCGTCCGTGCGCCGATGCGA	1	0.8606	0.00878163	0	0	0	0	0	0	0	0	0	0	0.8606	0	0	0	0	0	0	0	0	0	0	0	0	0	0	0	0	0	0	0	0	0	0	0	0	0	0	0	0	0	0
mmu-mir-712_61_89_+	61	89	.............................................................CGTCCGTGCGCCGATGCGAGTCACCCCC....................	28	CGTCCGTGCGCCGATGCGAGTCACCCCC	1	0.1461	0.00149082	0	0	0	0	0	0	0	0	0	0	0	0	0	0	0	0	0	0	0	0	0	0	0	0	0	0	0	0	0	0	0	0	0	0	0	0	0	0	0	0	0
mmu-mir-712_62_89_+	62	89	..............................................................GTCCGTGCGCCGATGCGAGTCACCCCC....................	27	GTCCGTGCGCCGATGCGAGTCACCCCC	1	0.1685	0.00171939	0	0	0	0	0	0	0	0	0	0	0	0	0	0	0	0	0	0	0	0	0	0	0	0	0	0	0	0	0	0	0	0	0	0	0	0	0	0	0	0	0
mmu-mir-712_63_85_+	63	85	...............................................................TCCGTGCGCCGATGCGAGTCAC........................	22	TCCGTGCGCCGATGCGAGTCAC	1	0.0907	0.00092551	0	0	0	0	0	0	0	0	0	0	0	0	0	0	0	0	0	0	0	0	0	0	0	0	0	0	0	0	0	0	0	0	0	0	0	0	0	0	0	0	0
mmu-mir-712_63_88_+	63	88	...............................................................TCCGTGCGCCGATGCGAGTCACCCC.....................	25	TCCGTGCGCCGATGCGAGTCACCCC	1	0.1461	0.00149082	0	0	0	0	0	0	0	0	0	0	0	0	0	0	0	0	0	0	0	0	0	0	0	0	0	0	0	0	0	0	0	0	0	0	0	0	0	0	0	0	0
mmu-mir-712_64_86_+	64	86	................................................................CCGTGCGCCGATGCGAGTCACC.......................	22	CCGTGCGCCGATGCGAGTCACC	1	0.1983	0.00202347	0	0	0	0	0	0	0	0	0	0	0	0	0	0	0	0	0	0	0	0	0	0	0	0	0	0	0	0	0	0	0	0	0	0	0	0	0	0	0	0	0
mmu-mir-712_64_94_+	64	94	................................................................CCGTGCGCCGATGCGAGTCACCCCCGGGTG...............	30	CCGTGCGCCGATGCGAGTCACCCCCGGGTG	1	0.1983	0.00202347	0	0	0	0	0	0	0	0	0	0	0	0	0	0	0	0	0	0	0	0	0	0	0	0	0	0	0	0	0	0	0	0	0	0	0	0	0	0	0	0	0
mmu-mir-712_65_91_+	65	91	.................................................................CGTGCGCCGATGCGAGTCACCCCCGG..................	26	CGTGCGCCGATGCGAGTCACCCCCGG	1	0.1983	0.00202347	0	0	0	0	0	0	0	0	0	0	0	0	0	0	0	0	0	0	0	0	0	0	0	0	0	0	0	0	0	0	0	0	0	0	0	0	0	0	0	0	0
mmu-mir-712_66_86_+	66	86	..................................................................GTGCGCCGATGCGAGTCACC.......................	20	GTGCGCCGATGCGAGTCACC	1	0.1983	0.00202347	0	0	0	0	0	0	0	0	0	0	0	0	0	0	0	0	0	0	0	0	0	0	0	0	0	0	0	0	0	0	0	0	0	0	0	0	0	0	0	0	0
mmu-mir-712_66_87_+	66	87	..................................................................GTGCGCCGATGCGAGTCACCC......................	21	GTGCGCCGATGCGAGTCACCC	1	0.3615	0.00368878	0	0	0	0	0	0	0	0	0	0	0	0	0	0	0	0	0	0	0	0	0	0	0	0	0	0	0	0	0.3615	0	0	0	0	0	0	0	0	0	0	0	0
mmu-mir-712_66_92_+	66	92	..................................................................GTGCGCCGATGCGAGTCACCCCCGGG.................	26	GTGCGCCGATGCGAGTCACCCCCGGG	1	0.1461	0.00149082	0	0	0	0	0	0	0	0	0	0	0	0	0	0	0	0	0	0	0	0	0	0	0	0	0	0	0	0	0	0	0	0	0	0	0	0	0	0	0	0	0
mmu-mir-712_66_94_+	66	94	..................................................................GTGCGCCGATGCGAGTCACCCCCGGGTG...............	28	GTGCGCCGATGCGAGTCACCCCCGGGTG	1	0.1481	0.00151122	0	0	0	0	0	0	0	0	0	0	0	0	0	0	0	0	0	0	0	0	0	0	0	0	0	0	0	0	0	0	0	0	0	0	0	0	0	0	0	0	0
mmu-mir-712_66_96_+	66	96	..................................................................GTGCGCCGATGCGAGTCACCCCCGGGTGTT.............	30	GTGCGCCGATGCGAGTCACCCCCGGGTGTT	1	0.1461	0.00149082	0	0	0	0	0	0	0	0	0	0	0	0	0	0	0	0	0	0	0	0	0	0	0	0	0	0	0	0	0	0	0	0	0	0	0	0	0	0	0	0	0
mmu-mir-712_67_86_+	67	86	...................................................................TGCGCCGATGCGAGTCACC.......................	19	TGCGCCGATGCGAGTCACC	1	0.1481	0.00151122	0	0	0	0	0	0	0	0	0	0	0	0	0	0	0	0	0	0	0	0	0	0	0	0	0	0	0	0	0	0	0	0	0	0	0	0	0	0	0	0	0
mmu-mir-712_67_87_+	67	87	...................................................................TGCGCCGATGCGAGTCACCC......................	20	TGCGCCGATGCGAGTCACCC	1	0.1983	0.00202347	0	0	0	0	0	0	0	0	0	0	0	0	0	0	0	0	0	0	0	0	0	0	0	0	0	0	0	0	0	0	0	0	0	0	0	0	0	0	0	0	0
mmu-mir-712_67_93_+	67	93	...................................................................TGCGCCGATGCGAGTCACCCCCGGGT................	26	TGCGCCGATGCGAGTCACCCCCGGGT	1	0.0494	0.000504082	0	0.0494	0	0	0	0	0	0	0	0	0	0	0	0	0	0	0	0	0	0	0	0	0	0	0	0	0	0	0	0	0	0	0	0	0	0	0	0	0	0	0
mmu-mir-712_67_94_+	67	94	...................................................................TGCGCCGATGCGAGTCACCCCCGGGTG...............	27	TGCGCCGATGCGAGTCACCCCCGGGTG	1	0.0924	0.000942857	0	0	0	0	0	0	0	0	0	0	0	0	0	0	0	0	0	0	0	0	0	0	0	0	0	0	0	0	0	0	0	0	0	0	0	0	0	0	0	0	0
mmu-mir-712_67_97_+	67	97	...................................................................TGCGCCGATGCGAGTCACCCCCGGGTGTTG............	30	TGCGCCGATGCGAGTCACCCCCGGGTGTTG	1	0.1481	0.00151122	0	0	0	0	0	0	0	0	0	0	0	0	0	0	0	0	0	0	0	0	0	0	0	0	0	0	0	0	0	0	0	0	0	0	0	0	0	0	0	0	0
mmu-mir-712_68_87_+	68	87	....................................................................GCGCCGATGCGAGTCACCC......................	19	GCGCCGATGCGAGTCACCC	1	0.1983	0.00202347	0	0	0	0	0	0	0	0	0	0	0	0	0	0	0	0	0	0	0	0	0	0	0	0	0	0	0	0	0	0	0	0	0	0	0	0	0	0	0	0	0
mmu-mir-712_68_92_+	68	92	....................................................................GCGCCGATGCGAGTCACCCCCGGG.................	24	GCGCCGATGCGAGTCACCCCCGGG	1	0.3247	0.00331327	0	0	0	0	0	0	0	0	0	0	0	0	0	0	0	0	0	0	0	0	0	0	0	0	0	0	0	0	0	0	0	0	0	0	0	0	0	0	0	0	0
mmu-mir-712_68_93_+	68	93	....................................................................GCGCCGATGCGAGTCACCCCCGGGT................	25	GCGCCGATGCGAGTCACCCCCGGGT	1	0.1461	0.00149082	0	0	0	0	0	0	0	0	0	0	0	0	0	0	0	0	0	0	0	0	0	0	0	0	0	0	0	0	0	0	0	0	0	0	0	0	0	0	0	0	0
mmu-mir-712_69_90_+	69	90	.....................................................................CGCCGATGCGAGTCACCCCCG...................	21	CGCCGATGCGAGTCACCCCCG	1	0.1507	0.00153776	0	0	0	0	0	0	0	0	0	0	0	0	0	0	0	0	0	0	0	0	0	0	0	0	0	0	0	0	0	0	0	0	0	0	0	0	0	0	0	0	0
mmu-mir-712_69_95_+	69	95	.....................................................................CGCCGATGCGAGTCACCCCCGGGTGT..............	26	CGCCGATGCGAGTCACCCCCGGGTGT	1	0.1983	0.00202347	0	0	0	0	0	0	0	0	0	0	0	0	0	0	0	0	0	0	0	0	0	0	0	0	0	0	0	0	0	0	0	0	0	0	0	0	0	0	0	0	0
mmu-mir-712_69_97_+	69	97	.....................................................................CGCCGATGCGAGTCACCCCCGGGTGTTG............	28	CGCCGATGCGAGTCACCCCCGGGTGTTG	1	0.3615	0.00368878	0	0	0	0	0	0	0	0	0	0	0	0	0	0	0	0	0	0	0	0	0	0	0	0	0	0	0	0	0.3615	0	0	0	0	0	0	0	0	0	0	0	0
mmu-mir-712_70_89_+	70	89	......................................................................GCCGATGCGAGTCACCCCC....................	19	GCCGATGCGAGTCACCCCC	1	0.1983	0.00202347	0	0	0	0	0	0	0	0	0	0	0	0	0	0	0	0	0	0	0	0	0	0	0	0	0	0	0	0	0	0	0	0	0	0	0	0	0	0	0	0	0
mmu-mir-712_70_90_+	70	90	......................................................................GCCGATGCGAGTCACCCCCG...................	20	GCCGATGCGAGTCACCCCCG	1	0.1481	0.00151122	0	0	0	0	0	0	0	0	0	0	0	0	0	0	0	0	0	0	0	0	0	0	0	0	0	0	0	0	0	0	0	0	0	0	0	0	0	0	0	0	0
mmu-mir-712_70_91_+	70	91	......................................................................GCCGATGCGAGTCACCCCCGG..................	21	GCCGATGCGAGTCACCCCCGG	1	0.1461	0.00149082	0	0	0	0	0	0	0	0	0	0	0	0	0	0	0	0	0	0	0	0	0	0	0	0	0	0	0	0	0	0	0	0	0	0	0	0	0	0	0	0	0
mmu-mir-712_70_93_+	70	93	......................................................................GCCGATGCGAGTCACCCCCGGGT................	23	GCCGATGCGAGTCACCCCCGGGT	1	0.1461	0.00149082	0	0	0	0	0	0	0	0	0	0	0	0	0	0	0	0	0	0	0	0	0	0	0	0	0	0	0	0	0	0	0	0	0	0	0	0	0	0	0	0	0
mmu-mir-712_70_94_+	70	94	......................................................................GCCGATGCGAGTCACCCCCGGGTG...............	24	GCCGATGCGAGTCACCCCCGGGTG	1	0.1983	0.00202347	0	0	0	0	0	0	0	0	0	0	0	0	0	0	0	0	0	0	0	0	0	0	0	0	0	0	0	0	0	0	0	0	0	0	0	0	0	0	0	0	0
mmu-mir-712_71_94_+	71	94	.......................................................................CCGATGCGAGTCACCCCCGGGTG...............	23	CCGATGCGAGTCACCCCCGGGTG	1	0.0491	0.00050102	0	0	0	0	0	0	0	0	0.0491	0	0	0	0	0	0	0	0	0	0	0	0	0	0	0	0	0	0	0	0	0	0	0	0	0	0	0	0	0	0	0	0
mmu-mir-712_71_95_+	71	95	.......................................................................CCGATGCGAGTCACCCCCGGGTGT..............	24	CCGATGCGAGTCACCCCCGGGTGT	1	0.1461	0.00149082	0	0	0	0	0	0	0	0	0	0	0	0	0	0	0	0	0	0	0	0	0	0	0	0	0	0	0	0	0	0	0	0	0	0	0	0	0	0	0	0	0
mmu-mir-712_73_95_+	73	95	.........................................................................GATGCGAGTCACCCCCGGGTGT..............	22	GATGCGAGTCACCCCCGGGTGT	1	0.104	0.00106122	0	0	0	0	0	0	0	0	0	0	0	0	0	0	0	0	0	0	0	0	0	0	0	0	0	0	0	0	0	0	0	0	0	0	0	0	0	0	0	0	0
mmu-mir-712_74_93_+	74	93	..........................................................................ATGCGAGTCACCCCCGGGT................	19	ATGCGAGTCACCCCCGGGT	1	0.104	0.00106122	0	0	0	0	0	0	0	0	0	0	0	0	0	0	0	0	0	0	0	0	0	0	0	0	0	0	0	0	0	0	0	0	0	0	0	0	0	0	0	0	0
mmu-mir-712_74_97_+	74	97	..........................................................................ATGCGAGTCACCCCCGGGTGTTG............	23	ATGCGAGTCACCCCCGGGTGTTG	1	0.3615	0.00368878	0	0	0	0	0	0	0	0	0	0	0	0	0	0	0	0	0	0	0	0	0	0	0	0	0	0	0	0	0.3615	0	0	0	0	0	0	0	0	0	0	0	0
mmu-mir-712_74_98_+	74	98	..........................................................................ATGCGAGTCACCCCCGGGTGTTGC...........	24	ATGCGAGTCACCCCCGGGTGTTGC	1	0.3615	0.00368878	0	0	0	0	0	0	0	0	0	0	0	0	0	0	0	0	0	0	0	0	0	0	0	0	0	0	0	0	0.3615	0	0	0	0	0	0	0	0	0	0	0	0
mmu-mir-712_74_100_+	74	100	..........................................................................ATGCGAGTCACCCCCGGGTGTTGCGA.........	26	ATGCGAGTCACCCCCGGGTGTTGCGA	1	0.0919	0.000937755	0	0	0	0	0	0	0	0	0	0	0	0	0	0	0	0	0	0	0	0	0	0	0	0	0	0	0	0	0	0	0	0	0	0	0	0	0	0	0	0	0
mmu-mir-712_75_103_+	75	103	...........................................................................TGCGAGTCACCCCCGGGTGTTGCGAGTT......	28	TGCGAGTCACCCCCGGGTGTTGCGAGTT	1	0.7244	0.00739184	0	0	0	0	0	0	0	0	0	0	0	0	0	0	0	0	0	0	0.7244	0	0	0	0	0	0	0	0	0	0	0	0	0	0	0	0	0	0	0	0	0	0
mmu-mir-712_76_103_+	76	103	............................................................................GCGAGTCACCCCCGGGTGTTGCGAGTT......	27	GCGAGTCACCCCCGGGTGTTGCGAGTT	1	0.3615	0.00368878	0	0	0	0	0	0	0	0	0	0	0	0	0	0	0	0	0	0	0	0	0	0	0	0	0	0	0	0	0.3615	0	0	0	0	0	0	0	0	0	0	0	0
mmu-mir-712_77_102_+	77	102	.............................................................................CGAGTCACCCCCGGGTGTTGCGAGT.......	25	CGAGTCACCCCCGGGTGTTGCGAGT	1	0.3615	0.00368878	0	0	0	0	0	0	0	0	0	0	0	0	0	0	0	0	0	0	0	0	0	0	0	0	0	0	0	0	0.3615	0	0	0	0	0	0	0	0	0	0	0	0
mmu-mir-712_78_96_+	78	96	..............................................................................GAGTCACCCCCGGGTGTT.............	18	GAGTCACCCCCGGGTGTT	1	0.0924	0.000942857	0	0	0	0	0	0	0	0	0	0	0	0	0	0	0	0	0	0	0	0	0	0	0	0	0	0	0	0	0	0	0	0	0	0	0	0	0	0	0	0	0
mmu-mir-712_78_99_+	78	99	..............................................................................GAGTCACCCCCGGGTGTTGCG..........	21	GAGTCACCCCCGGGTGTTGCG	1	0.3615	0.00368878	0	0	0	0	0	0	0	0	0	0	0	0	0	0	0	0	0	0	0	0	0	0	0	0	0	0	0	0	0.3615	0	0	0	0	0	0	0	0	0	0	0	0
mmu-mir-712_79_99_+	79	99	...............................................................................AGTCACCCCCGGGTGTTGCG..........	20	AGTCACCCCCGGGTGTTGCG	1	0.669	0.00682653	0	0	0	0	0	0	0	0	0	0	0	0	0	0	0	0	0	0	0	0.669	0	0	0	0	0	0	0	0	0	0	0	0	0	0	0	0	0	0	0	0	0
mmu-mir-712_79_100_+	79	100	...............................................................................AGTCACCCCCGGGTGTTGCGA.........	21	AGTCACCCCCGGGTGTTGCGA	1	0.7371	0.00752143	0	0	0	0	0	0	0	0	0	0	0	0	0	0	0	0.7371	0	0	0	0	0	0	0	0	0	0	0	0	0	0	0	0	0	0	0	0	0	0	0	0	0
mmu-mir-712_80_102_+	80	102	................................................................................GTCACCCCCGGGTGTTGCGAGT.......	22	GTCACCCCCGGGTGTTGCGAGT	1	0.0919	0.000937755	0	0	0	0	0	0	0	0	0	0	0	0	0	0	0	0	0	0	0	0	0	0	0	0	0	0	0	0	0	0	0	0	0	0	0	0	0	0	0	0	0
mmu-mir-712_80_105_+	80	105	................................................................................GTCACCCCCGGGTGTTGCGAGTTCG....	25	GTCACCCCCGGGTGTTGCGAGTTCG	1	0.3615	0.00368878	0	0	0	0	0	0	0	0	0	0	0	0	0	0	0	0	0	0	0	0	0	0	0	0	0	0	0	0	0.3615	0	0	0	0	0	0	0	0	0	0	0	0
mmu-mir-712_80_108_+	80	108	................................................................................GTCACCCCCGGGTGTTGCGAGTTCGGGG.	28	GTCACCCCCGGGTGTTGCGAGTTCGGGG	1	0.3615	0.00368878	0	0	0	0	0	0	0	0	0	0	0	0	0	0	0	0	0	0	0	0	0	0	0	0	0	0	0	0	0.3615	0	0	0	0	0	0	0	0	0	0	0	0
mmu-mir-712_80_109_+	80	109	................................................................................GTCACCCCCGGGTGTTGCGAGTTCGGGGA	29	GTCACCCCCGGGTGTTGCGAGTTCGGGGA	1	0.0469	0.000478571	0	0	0	0	0	0	0	0.0469	0	0	0	0	0	0	0	0	0	0	0	0	0	0	0	0	0	0	0	0	0	0	0	0	0	0	0	0	0	0	0	0	0
mmu-mir-712_82_102_+	82	102	..................................................................................CACCCCCGGGTGTTGCGAGT.......	20	CACCCCCGGGTGTTGCGAGT	1	0.0469	0.000478571	0	0	0	0	0	0	0	0.0469	0	0	0	0	0	0	0	0	0	0	0	0	0	0	0	0	0	0	0	0	0	0	0	0	0	0	0	0	0	0	0	0	0
mmu-mir-712_82_107_+	82	107	..................................................................................CACCCCCGGGTGTTGCGAGTTCGGG..	25	CACCCCCGGGTGTTGCGAGTTCGGG	1	0.1461	0.00149082	0	0	0	0	0	0	0	0	0	0	0	0	0	0	0	0	0	0	0	0	0	0	0	0	0	0	0	0	0	0	0	0	0	0	0	0	0	0	0	0	0
mmu-mir-712_83_105_+	83	105	...................................................................................ACCCCCGGGTGTTGCGAGTTCG....	22	ACCCCCGGGTGTTGCGAGTTCG	1	0.0494	0.000504082	0	0.0494	0	0	0	0	0	0	0	0	0	0	0	0	0	0	0	0	0	0	0	0	0	0	0	0	0	0	0	0	0	0	0	0	0	0	0	0	0	0	0
mmu-mir-712_84_109_+	84	109	....................................................................................CCCCCGGGTGTTGCGAGTTCGGGGA	25	CCCCCGGGTGTTGCGAGTTCGGGGA	1	0.1675	0.00170918	0	0	0	0	0	0	0	0	0	0	0	0	0	0	0	0	0	0	0	0	0	0	0	0	0	0	0	0	0	0	0	0	0	0	0	0	0	0	0	0	0
mmu-mir-712_86_107_+	86	107	......................................................................................CCCGGGTGTTGCGAGTTCGGG..	21	CCCGGGTGTTGCGAGTTCGGG	1	0.3615	0.00368878	0	0	0	0	0	0	0	0	0	0	0	0	0	0	0	0	0	0	0	0	0	0	0	0	0	0	0	0	0.3615	0	0	0	0	0	0	0	0	0	0	0	0
mmu-mir-712_89_108_+	89	108	.........................................................................................GGGTGTTGCGAGTTCGGGG.	19	GGGTGTTGCGAGTTCGGGG	1	0.1481	0.00151122	0	0	0	0	0	0	0	0	0	0	0	0	0	0	0	0	0	0	0	0	0	0	0	0	0	0	0	0	0	0	0	0	0	0	0	0	0	0	0	0	0
mmu-mir-712_91_109_+	91	109	...........................................................................................GTGTTGCGAGTTCGGGGA	18	GTGTTGCGAGTTCGGGGA	1	0.1481	0.00151122	0	0	0	0	0	0	0	0	0	0	0	0	0	0	0	0	0	0	0	0	0	0	0	0	0	0	0	0	0	0	0	0	0	0	0	0	0	0	0	0	0
[truncated: 57 more columns]

## Sheet: mmu-mir-714
key	start0based	stop1based	mmu-mir-714	sequencelength	sequence	sumcount	sumnormRPMmirpre	Average (RPM normalized by miRNA mapping reads)	SRR640602.GSM1057530: ES_NI; Mus musculus; RNA-Seq	SRR640603.GSM1057531: ES_EMCV 3hrs; Mus musculus; RNA-Seq	SRR640604.GSM1057532: ES_EMCV 6hrs; Mus musculus; RNA-Seq	SRR640605.GSM1057533: ES_D0 INF; Mus musculus; RNA-Seq	SRR640606.GSM1057534: ES_D10 NI; Mus musculus; RNA-Seq	SRR640607.GSM1057535: ES_D10 INF; Mus musculus; RNA-Seq	SRR640612.GSM1057540: IP_mAGO2_INF; Mus musculus; RNA-Seq	SRR640614.GSM1057542: ES_NoV; Mus musculus; RNA-Seq	SRR640615.GSM1057543: ES_NoVÃ«Ã“B2; Mus musculus; RNA-Seq	SRR037904.GSM510440: brain_rep1	SRR037905.GSM510441: brain_rep2	SRR037906.GSM510442: brain_rep3	SRR037907.GSM510443: brain_rep4	SRR037919.GSM510457: e12p5_rep1	SRR037920.GSM510458: e12p5_rep2	SRR037921.GSM510459: e12p5_rep3	SRR037922.GSM510460: e12p5_rep4	SRR037923.GSM510461: e9p5_rep1	SRR037924.GSM510462: e9p5_rep2	SRR037925.GSM510463: e9p5_rep3	SRR037926.GSM510464: e9p5_rep4	SRR037927.GSM510465: e7p5_rep1	SRR037928.GSM510466: e7p5_rep2	SRR037929.GSM510467: e7p5_rep3	SRR037930.GSM510468: e7p5_rep4	SRR038741.GSM527276: DGCR8_wt_hippocampus	SRR038744.GSM527279: DGCR8_wt_cortex	SRR039610.GSM527274: DICER_wt_hippocampus	SRR040488.GSM533911: E18.5 wild type LIVER small RNA	SRR042477.GSM539869: mouse brain tissue [09-002]	SRR042482.GSM539874: mouse skin tissue [09-002]	SRR069834.GSM304914: Analysis of small RNAs in murine neutrophils cultured in vitro by Solexa/Illumina genome analyzer	SRR206939.GSM723280: NAc_saline_smallRNA	SRR206940.GSM723281: NAc_cocaine_smallRNA	SRR206941.GSM723282: PSD_saline_smallRNA	SRR206942.GSM723283: PSD_cocaine_smallRNA	SRR306526.GSM750569: Cerebellum_1	SRR306527.GSM750570: Cerebellum_2	SRR306528.GSM750571: Cerebellum_3	SRR306529.GSM750572: Purkinje_1	SRR306530.GSM750573: Purkinje_2
key	start0based	stop1based	CGACGAGGGCCGGTCGGTCGCCCTGCGGTGGTTGTCTGTGTGTGTTTGGGTCTTGCGCTGGGGGAGGCGGGGTCGACCGCTCGCGGGGTTGGCGCGGTCGCCCGGCGCCG	sequencelength	sequence	sumcount	sumnormRPMmirpre	average normRPMmirpre	SRR640602.NormRPMmirpre	SRR640603.NormRPMmirpre	SRR640604.NormRPMmirpre	SRR640605.NormRPMmirpre	SRR640606.NormRPMmirpre	SRR640607.NormRPMmirpre	SRR640612.NormRPMmirpre	SRR640614.NormRPMmirpre	SRR640615.NormRPMmirpre	SRR037904.NormRPMmirpre	SRR037905.NormRPMmirpre	SRR037906.NormRPMmirpre	SRR037907.NormRPMmirpre	SRR037919.NormRPMmirpre	SRR037920.NormRPMmirpre	SRR037921.NormRPMmirpre	SRR037922.NormRPMmirpre	SRR037923.NormRPMmirpre	SRR037924.NormRPMmirpre	SRR037925.NormRPMmirpre	SRR037926.NormRPMmirpre	SRR037927.NormRPMmirpre	SRR037928.NormRPMmirpre	SRR037929.NormRPMmirpre	SRR037930.NormRPMmirpre	SRR038741.NormRPMmirpre	SRR038744.NormRPMmirpre	SRR039610.NormRPMmirpre	SRR040488.NormRPMmirpre	SRR042477.NormRPMmirpre	SRR042482.NormRPMmirpre	SRR069834.NormRPMmirpre	SRR206939.NormRPMmirpre	SRR206940.NormRPMmirpre	SRR206941.NormRPMmirpre	SRR206942.NormRPMmirpre	SRR306526.NormRPMmirpre	SRR306527.NormRPMmirpre	SRR306528.NormRPMmirpre	SRR306529.NormRPMmirpre	SRR306530.NormRPMmirpre
mmu-mir-714_0_23_+	0	23	CGACGAGGGCCGGTCGGTCGCCC.......................................................................................	23	CGACGAGGGCCGGTCGGTCGCCC	1207	122.328	1.24824	0	0	0	0	0.0938	0	0	0	0.1472	0	0	0	0	0	0	0	0	0	0	0	0	0	0	0	0	0	0	0	0	0	0	0	0	0	0	0	0	0	0	0	0
mmu-mir-714_1_19_+	1	19	.GACGAGGGCCGGTCGGTC...........................................................................................	18	GACGAGGGCCGGTCGGTC	491	27.9846	0.285557	3.6392	3.3098	4.9339	3.1779	0.5629	2.8135	7.7038	1.2658	0.0491	0	0	0	0	0	0	0	0	0	0	0	0	0	0	0	0	0	0	0	0	0	0	0	0	0	0	0	0	0	0	0	0
mmu-mir-714_53_72_+	53	72	.....................................................TGCGCTGGGGGAGGCGGGG......................................	19	TGCGCTGGGGGAGGCGGGG	435	80.4174	0.820586	0	0	0.0617	0.1077	0	0.0612	0	0.1406	0.3926	0	0	0	0	0	0	0	0	0	0	0	0	0	0	0	0	0	0	0	1.446	0	0	0	0	0.1894	0	0	0	0	0	0	0
mmu-mir-714_54_72_+	54	72	......................................................GCGCTGGGGGAGGCGGGG......................................	18	GCGCTGGGGGAGGCGGGG	181	30.0052	0.306176	0	0.0494	0	0	0	0	0	0.0938	0.0491	0	0	0	0	0	0	0	0	0	0	0	0	0	0	0	0	0	0	0	0	0	0	0	0	0	0	0	0	0	0	0	0
mmu-mir-714_58_80_+	58	80	..........................................................TGGGGGAGGCGGGGTCGACCGC..............................	22	TGGGGGAGGCGGGGTCGACCGC	145	13.7265	0.140066	2.4261	0.2964	0.1233	0.3232	0.6567	0.6116	0.0562	0.3751	0.4417	0	0	0.6999	0	0	0	0	0	0	0	0.669	0	0	0	0	0	0	0	0	2.5305	0	0	0	0	0.1894	0	0	0	0	0	0	0
mmu-mir-714_92_110_+	92	110	............................................................................................CGCGGTCGCCCGGCGCCG	18	CGCGGTCGCCCGGCGCCG	137	10.0511	0.102562	0.5459	0.1482	0.5551	0.2693	0.5629	0.4893	3.8238	0.797	0.1472	0	0	0	0	0	0	0	0	0	0	0	0	0	0	0	0	0	0	0	0	0	0	0	0	0	0	0	0	0	0	0	0
mmu-mir-714_58_78_+	58	78	..........................................................TGGGGGAGGCGGGGTCGACC................................	20	TGGGGGAGGCGGGGTCGACC	131	8.7418	0.089202	1.4557	1.482	1.4802	0.2693	0.1876	0.0612	0.8997	0.2813	0.3926	0	0	0	0	0	0	0	0	0	0	0	0	0	0	0	0	0	0	0	0.3615	0	0	0	0	0	0	0	0	0.2973	0	0	0.3895
mmu-mir-714_82_106_+	82	106	..................................................................................GCGGGGTTGGCGCGGTCGCCCGGC....	24	GCGGGGTTGGCGCGGTCGCCCGGC	128	7.3913	0.0754214	1.8196	1.5314	1.2335	0.4309	0.1407	0.3058	0.3374	0.3751	0.6871	0	0	0	0	0	0	0	0	0	0	0	0	0	0	0	0	0	0	0	0	0	0	0	0	0	0	0	0	0	0	0	0
mmu-mir-714_88_106_+	88	106	........................................................................................TTGGCGCGGTCGCCCGGC....	18	TTGGCGCGGTCGCCCGGC	127	7.3627	0.0751296	1.6377	1.0374	2.8987	0.2693	0.1876	0.1835	0.2249	0.2344	0.4417	0	0	0	0	0	0	0	0	0	0	0	0	0	0	0	0	0	0	0	0	0	0	0	0	0	0	0	0	0	0	0	0
mmu-mir-714_1_21_+	1	21	.GACGAGGGCCGGTCGGTCGC.........................................................................................	20	GACGAGGGCCGGTCGGTCGC	116	8.1359	0.0830194	1.3344	0.0494	0.8018	0.0539	0	0.1835	2.6429	0.1406	0.9324	0	0	0	0	0	0	0	0	0	0	0	0	0	0	0	0	0	0	0	0.3615	0	0	0	0	0	0	0	0	0	0	0	0
mmu-mir-714_5_23_+	5	23	.....AGGGCCGGTCGGTCGCCC.......................................................................................	18	AGGGCCGGTCGGTCGCCC	114	8.779	0.0895816	1.2737	0.8892	0.9251	0.5386	0.0469	0.1223	0	1.0783	0.6871	0	0	0	0	0	0	0	0	0	0	0	0	0	0	0	0	0	0	0	0	0	0	0	0	0	0	0	0	0	0	0	0
mmu-mir-714_82_101_+	82	101	..................................................................................GCGGGGTTGGCGCGGTCGC.........	19	GCGGGGTTGGCGCGGTCGC	112	6.3554	0.064851	0.9705	0.6422	1.3568	0.7002	0	0	0.3374	0.5626	1.2269	0	0	0	0	0	0	0	0	0	0	0	0	0	0	0	0	0	0	0	0	0	0	0	0	0	0	0	0	0	0	0	0
mmu-mir-714_53_71_+	53	71	.....................................................TGCGCTGGGGGAGGCGGG.......................................	18	TGCGCTGGGGGAGGCGGG	106	17.6635	0.18024	0	0.247	0	0.1077	0	0.2447	0	0.1875	0.0491	0	0	0	0	0	0	0	0	0	0	0	0	0	0	0	0	0	0	0	1.446	0	0	0	0	0	0	0	0	0	0	0	0
mmu-mir-714_58_81_+	58	81	..........................................................TGGGGGAGGCGGGGTCGACCGCT.............................	23	TGGGGGAGGCGGGGTCGACCGCT	104	51.553	0.526051	0.3639	0.7904	0.6784	0.5925	0.4691	0.3058	0	0.3751	0.3926	0	0.8606	0	0	0	0	0	0	3.0202	0	0	0	0	0	0	0	0	0	0	1.8075	0	0	0	0	0	0	0	0	0	0	0	0
mmu-mir-714_1_20_+	1	20	.GACGAGGGCCGGTCGGTCG..........................................................................................	19	GACGAGGGCCGGTCGGTCG	88	5.1726	0.0527816	1.5163	0.0494	0.4934	0.377	0	0.0612	1.5745	0.4688	0.2454	0	0	0	0	0	0	0	0	0	0	0	0	0	0	0	0	0	0	0	0	0	0	0	0	0	0	0	0	0	0	0	0
mmu-mir-714_1_23_+	1	23	.GACGAGGGCCGGTCGGTCGCCC.......................................................................................	22	GACGAGGGCCGGTCGGTCGCCC	83	8.0238	0.0818755	0	0	0.37	0	0	0	0	0	0.0491	0	0	0	0	0	0	0	0	0	0	0	0	0	0	0	0	0	0	0	0	0	0	0	0	0	0	0	0	0	0	0	0
mmu-mir-714_23_46_+	23	46	.......................TGCGGTGGTTGTCTGTGTGTGTT................................................................	23	TGCGGTGGTTGTCTGTGTGTGTT	82	17.0126	0.173598	0	0	0	0	0	0	0.3374	0.1406	0.0982	0	0	0	0	0	0	0	0	0	0	0	0	0	0	0	0	0	0	0	0.3615	0	0	0	0	0	0	0	0	0	0	0	0
mmu-mir-714_52_71_+	52	71	....................................................TTGCGCTGGGGGAGGCGGG.......................................	19	TTGCGCTGGGGGAGGCGGG	80	4.7316	0.0482816	1.0918	1.1362	0	0	0	0.0612	0	0.7032	0.8343	0	0	0	0	0	0	0	0	0	0	0	0	0	0	0	0	0	0	0	0	0	0	0	0	0	0	0	0	0	0	0	0
mmu-mir-714_58_79_+	58	79	..........................................................TGGGGGAGGCGGGGTCGACCG...............................	21	TGGGGGAGGCGGGGTCGACCG	80	8.0882	0.0825327	1.8196	0.1976	0.4934	0.1616	0.2815	0	0.2249	0.2344	0.2454	0	0	0	0	0	0	0	0	0	0	0	0	0	0	0	0	0	0	0	1.446	0	0	0	0	0	0	0	0	0	0	0.469	0.7791
mmu-mir-714_23_44_+	23	44	.......................TGCGGTGGTTGTCTGTGTGTG..................................................................	21	TGCGGTGGTTGTCTGTGTGTG	72	15.5207	0.158374	0	0	0	0	0	0	0.3936	0	0	0	0	0	0	0	0	0	0	0	0	0	0	0	0	0	0	0	0	0	0.3615	0	0	0	0	0	0	0	0	0	0	0	0
mmu-mir-714_0_21_+	0	21	CGACGAGGGCCGGTCGGTCGC.........................................................................................	21	CGACGAGGGCCGGTCGGTCGC	68	6.7945	0.0693316	0.182	0.0494	0	0	0	0	2.193	0.2344	0.0491	0	0	0	0	0	0	0	0	0	0	0	0	0	0	0	0	0	0	0	0	0	0	0	0	0	0	0	0	0	0	0	0
mmu-mir-714_10_36_+	10	36	..........CGGTCGGTCGCCCTGCGGTGGTTGTC..........................................................................	26	CGGTCGGTCGCCCTGCGGTGGTTGTC	68	4.4019	0.0449173	0	0.1976	1.1101	0.0539	0	0	1.7994	0.4688	0.0491	0	0	0	0	0	0	0	0	0	0	0	0	0	0	0	0	0	0	0	0.723	0	0	0	0	0	0	0	0	0	0	0	0
mmu-mir-714_23_42_+	23	42	.......................TGCGGTGGTTGTCTGTGTG....................................................................	19	TGCGGTGGTTGTCTGTGTG	68	15.9273	0.162523	0	0	0	0	0	0	0	0	0.0491	0	0	0	0	0	0	0	0	0	0	0	0	0	0	0	0	0	0	0	0.723	0	0	0	0	0	0	0	0	0	0	0	0
mmu-mir-714_73_96_+	73	96	.........................................................................CGACCGCTCGCGGGGTTGGCGCG..............	23	CGACCGCTCGCGGGGTTGGCGCG	64	12.4367	0.126905	0	0	0	0	0	0.0612	0	0	0.1963	0	0	0	0	0	0	0	0	0	0	0	0	0	0	0	0	0	0	0	0	0	0	0	0	0	0	0	0	0	0	0	0
mmu-mir-714_24_48_+	24	48	........................GCGGTGGTTGTCTGTGTGTGTTTG..............................................................	24	GCGGTGGTTGTCTGTGTGTGTTTG	62	18.0817	0.184507	0	0.3952	0	0.2155	0	0	0	0	0	0	0	0	0	0	0	0	0	0	0	0	0	0	0	0	0	0	0	0	15.5448	0	0	0	0	0	0	0	0	0	0	0	0
mmu-mir-714_53_79_+	53	79	.....................................................TGCGCTGGGGGAGGCGGGGTCGACCG...............................	26	TGCGCTGGGGGAGGCGGGGTCGACCG	62	3.1689	0.0323357	0.182	0.0988	0.3084	0.3232	0.0938	0.1223	0.1125	0.7501	1.1778	0	0	0	0	0	0	0	0	0	0	0	0	0	0	0	0	0	0	0	0	0	0	0	0	0	0	0	0	0	0	0	0
mmu-mir-714_52_79_+	52	79	....................................................TTGCGCTGGGGGAGGCGGGGTCGACCG...............................	27	TTGCGCTGGGGGAGGCGGGGTCGACCG	58	3.2969	0.0336418	0.6672	0.247	1.4802	0.1616	0.0469	0	0.3936	0.0938	0.1963	0	0	0	0	0	0	0	0	0	0	0	0	0	0	0	0	0	0	0	0	0	0	0	0	0	0	0	0	0	0	0	0
mmu-mir-714_0_22_+	0	22	CGACGAGGGCCGGTCGGTCGCC........................................................................................	22	CGACGAGGGCCGGTCGGTCGCC	54	6.746	0.0688367	0	0	0	0	0	0	0.3374	0.0469	0.0982	0	0	0	0	0	0	0	0	0	0	0	0	0	0	0	0	0	0	0	0	0	0	0	0	0	0	0	0	0	0	0	0
mmu-mir-714_90_108_+	90	108	..........................................................................................GGCGCGGTCGCCCGGCGC..	18	GGCGCGGTCGCCCGGCGC	53	3.0058	0.0306714	0.5459	0.3458	0.37	0	0	0	1.1246	0.1406	0.2945	0	0	0	0	0	0	0	0	0	0	0	0	0	0	0	0	0	0	0	0	0	0	0	0	0	0	0	0	0	0	0	0
mmu-mir-714_52_78_+	52	78	....................................................TTGCGCTGGGGGAGGCGGGGTCGACC................................	26	TTGCGCTGGGGGAGGCGGGGTCGACC	51	2.8999	0.0295908	0.9705	0.5928	0.8634	0.1616	0	0	0.1687	0.0938	0.0491	0	0	0	0	0	0	0	0	0	0	0	0	0	0	0	0	0	0	0	0	0	0	0	0	0	0	0	0	0	0	0	0
mmu-mir-714_80_102_+	80	102	................................................................................TCGCGGGGTTGGCGCGGTCGCC........	22	TCGCGGGGTTGGCGCGGTCGCC	50	3.2028	0.0326816	0.3033	0	1.1718	0	0.0469	0	0.1125	0.4688	0.3926	0	0	0	0	0	0	0	0	0	0	0	0	0	0	0	0	0	0	0	0	0	0	0	0	0	0	0	0	0	0	0	0
mmu-mir-714_52_72_+	52	72	....................................................TTGCGCTGGGGGAGGCGGGG......................................	20	TTGCGCTGGGGGAGGCGGGG	49	3.4948	0.0356612	0.2426	0.8398	0.3084	0	0.0938	0	0	0.4688	0.0491	0	0	0	0	0	0	0	0	0	0	0	0	0	0	0	0	0	0	0	0.3615	0	0	0	0	0	0	0	0	0	0	0	0
mmu-mir-714_31_53_+	31	53	...............................TTGTCTGTGTGTGTTTGGGTCT.........................................................	22	TTGTCTGTGTGTGTTTGGGTCT	47	3.2415	0.0330765	0	0.0988	0	0	0	0	2.0806	0.0469	0	0	0	0	0	0	0	0	0	0	0	0	0	0	0	0	0	0	0	0	0.3615	0	0	0	0	0	0	0	0	0	0	0	0
mmu-mir-714_2_21_+	2	21	..ACGAGGGCCGGTCGGTCGC.........................................................................................	19	ACGAGGGCCGGTCGGTCGC	46	2.7852	0.0284204	0.1213	0.0988	0.6784	0.1616	0	0	1.0122	0.0938	0.1963	0	0	0	0	0	0	0	0	0	0	0	0	0	0	0	0	0	0	0	0	0	0	0	0	0	0	0	0	0	0	0	0
mmu-mir-714_53_80_+	53	80	.....................................................TGCGCTGGGGGAGGCGGGGTCGACCGC..............................	27	TGCGCTGGGGGAGGCGGGGTCGACCGC	46	2.5154	0.0256673	0.3639	0.5434	0.8634	0.1077	0.0469	0.0612	0	0.2344	0.2945	0	0	0	0	0	0	0	0	0	0	0	0	0	0	0	0	0	0	0	0	0	0	0	0	0	0	0	0	0	0	0	0
mmu-mir-714_3_21_+	3	21	...CGAGGGCCGGTCGGTCGC.........................................................................................	18	CGAGGGCCGGTCGGTCGC	45	3.0316	0.0309347	0.2426	0.1976	0.0617	0.1616	0.1407	0.2447	0.3936	0.3751	0.3435	0	0	0	0	0	0	0	0	0	0	0	0	0	0	0	0	0	0	0	0	0	0	0	0	0	0	0	0	0	0	0	0
mmu-mir-714_0_27_+	0	27	CGACGAGGGCCGGTCGGTCGCCCTGCG...................................................................................	27	CGACGAGGGCCGGTCGGTCGCCCTGCG	44	4.1689	0.0425398	0	0	0	0	0	0	0	0.0469	0.0491	0	0	0	0	0	0	0	0	0	0	0	0	0	0	0	0	0	0	0	0	0	0	0	0	0	0	0	0	0	0	0	0
mmu-mir-714_9_36_+	9	36	.........CCGGTCGGTCGCCCTGCGGTGGTTGTC..........................................................................	27	CCGGTCGGTCGCCCTGCGGTGGTTGTC	44	2.5072	0.0255837	0.4852	0	0.6167	0.1616	0	0	0.9559	0.1406	0.1472	0	0	0	0	0	0	0	0	0	0	0	0	0	0	0	0	0	0	0	0	0	0	0	0	0	0	0	0	0	0	0	0
mmu-mir-714_31_51_+	31	51	...............................TTGTCTGTGTGTGTTTGGGT...........................................................	20	TTGTCTGTGTGTGTTTGGGT	44	2.6943	0.0274929	0	0	0	0	0.2346	0	1.9119	0.0938	0	0	0	0	0	0	0	0	0	0	0	0	0	0	0	0	0	0	0	0	0	0	0	0	0	0	0	0.2039	0	0	0	0	0
mmu-mir-714_1_22_+	1	22	.GACGAGGGCCGGTCGGTCGCC........................................................................................	21	GACGAGGGCCGGTCGGTCGCC	43	3.1046	0.0316796	0.182	0.1976	0.185	0.1616	0.1407	0	0.6186	0.0938	0.1472	0	0	0	0	0	0	0	0	0	0	0	0	0	0	0	0	0	0	0	0	0	0	0	0	0	0	0	0	0	0	0	0
mmu-mir-714_31_50_+	31	50	...............................TTGTCTGTGTGTGTTTGGG............................................................	19	TTGTCTGTGTGTGTTTGGG	42	3.245	0.0331122	0.0607	0	0	0	0.1407	0	1.3496	0	0	0	0	0	0	0	0	0	0	0	0	0	0	0	0	0	0	0	0	0	0	0	0	0	0	0	0	0	0	0	0	0	0
mmu-mir-714_2_23_+	2	23	..ACGAGGGCCGGTCGGTCGCCC.......................................................................................	21	ACGAGGGCCGGTCGGTCGCCC	41	3.9529	0.0403357	0	0	0	0	0	0	0	0	0	0	0	0	0	0	0	0	0	0	0	0	0	0	0	0	0	0	0	0	0	0	0	0	0	0	0	0	0	0	0	0	0
mmu-mir-714_25_48_+	25	48	.........................CGGTGGTTGTCTGTGTGTGTTTG..............................................................	23	CGGTGGTTGTCTGTGTGTGTTTG	39	7.6424	0.0779837	0	0	0.3084	0	0	0	0.5623	0.1875	0	0	0	0	0	0	0	0	0	0	0	0	0	0	0	0	0	0	0	0	6.1456	0	0	0	0	0	0	0	0	0	0	0	0
mmu-mir-714_82_103_+	82	103	..................................................................................GCGGGGTTGGCGCGGTCGCCC.......	21	GCGGGGTTGGCGCGGTCGCCC	39	2.1992	0.0224408	0.4246	0.2964	0.37	0	0	0	0.7872	0.0938	0.1472	0	0	0	0	0	0	0	0	0	0	0	0	0	0	0	0	0	0	0	0	0	0	0	0	0	0	0	0	0	0	0	0
mmu-mir-714_25_50_+	25	50	.........................CGGTGGTTGTCTGTGTGTGTTTGGG............................................................	25	CGGTGGTTGTCTGTGTGTGTTTGGG	38	22.2631	0.227174	0.1213	0	0.5551	0.1616	0	0.1223	0.5623	0	0	0	0	0	0	0	0	0	0	0	0	0	0	0	0	0	0	0	0	0	2.5305	0	0	0	0	0	0	0	0	0	0	0	0
mmu-mir-714_32_53_+	32	53	................................TGTCTGTGTGTGTTTGGGTCT.........................................................	21	TGTCTGTGTGTGTTTGGGTCT	38	3.4589	0.0352949	0	0	0	0	0	0	1.3496	0	0	0	0	0	0	0	0	0	0	0	0	0	0	0	0	0	0	0	0	0	0	0	0	0	0	0	0	0	0	0	0	0	0
mmu-mir-714_87_106_+	87	106	.......................................................................................GTTGGCGCGGTCGCCCGGC....	19	GTTGGCGCGGTCGCCCGGC	38	2.2439	0.0228969	1.3344	0.741	0	0	0	0	0	0	0	0	0	0	0	0	0	0	0	0	0	0	0	0	0	0	0	0	0	0	0	0	0	0	0	0	0	0	0	0	0	0	0
mmu-mir-714_0_19_+	0	19	CGACGAGGGCCGGTCGGTC...........................................................................................	19	CGACGAGGGCCGGTCGGTC	36	2.4443	0.0249418	0	0.4446	0.3084	0.1077	0	0.6728	0	0.0469	0.2454	0	0	0	0	0	0	0	0	0	0	0	0	0	0	0	0	0	0	0	0	0	0	0	0	0	0	0	0	0	0	0	0
mmu-mir-714_23_48_+	23	48	.......................TGCGGTGGTTGTCTGTGTGTGTTTG..............................................................	25	TGCGGTGGTTGTCTGTGTGTGTTTG	36	9.9615	0.101648	0	0	0	0	0	0	0.5623	0	0	0	0	0	0	0	0	0	0	0	0	0	0	0	0	0	0	0	0	0	9.3992	0	0	0	0	0	0	0	0	0	0	0	0
mmu-mir-714_21_40_+	21	40	.....................CCTGCGGTGGTTGTCTGTG......................................................................	19	CCTGCGGTGGTTGTCTGTG	35	2.1154	0.0215857	0	0.1976	0	0	0	0	1.5745	0	0.0491	0	0	0	0	0	0	0	0	0	0	0	0	0	0	0	0	0	0	0	0	0	0	0	0	0	0	0	0	0	0	0	0
mmu-mir-714_78_106_+	78	106	..............................................................................GCTCGCGGGGTTGGCGCGGTCGCCCGGC....	28	GCTCGCGGGGTTGGCGCGGTCGCCCGGC	33	1.7973	0.0183398	0.2426	0.5434	0.3084	0.0539	0	0	0.5061	0.0938	0.0491	0	0	0	0	0	0	0	0	0	0	0	0	0	0	0	0	0	0	0	0	0	0	0	0	0	0	0	0	0	0	0	0
mmu-mir-714_82_104_+	82	104	..................................................................................GCGGGGTTGGCGCGGTCGCCCG......	22	GCGGGGTTGGCGCGGTCGCCCG	33	1.802	0.0183878	0.1213	0	0.4934	0.1616	0	0	0.4499	0.2813	0.2945	0	0	0	0	0	0	0	0	0	0	0	0	0	0	0	0	0	0	0	0	0	0	0	0	0	0	0	0	0	0	0	0
mmu-mir-714_28_50_+	28	50	............................TGGTTGTCTGTGTGTGTTTGGG............................................................	22	TGGTTGTCTGTGTGTGTTTGGG	32	3.6167	0.0369051	0	0	0	0	0	0	0	0.0469	0	0	0	0	0	0	0	0	0	0	0	0	0	0	0	0	0	0	0	0	0	0	0	0	0	0	0	0	0	0	0	0	0
mmu-mir-714_24_53_+	24	53	........................GCGGTGGTTGTCTGTGTGTGTTTGGGTCT.........................................................	29	GCGGTGGTTGTCTGTGTGTGTTTGGGTCT	31	2.2295	0.02275	0	0	0.0617	0.1616	0	0	1.2933	0.0469	0	0	0	0	0	0	0	0	0	0	0	0	0	0	0	0	0	0	0	0	0.3615	0	0	0	0	0	0	0	0	0	0	0	0
mmu-mir-714_82_110_+	82	110	..................................................................................GCGGGGTTGGCGCGGTCGCCCGGCGCCG	28	GCGGGGTTGGCGCGGTCGCCCGGCGCCG	31	2.3679	0.0241622	0.182	0.3458	0.2467	0	0	0	0.5623	0.1406	0.0982	0	0	0.6999	0	0	0	0	0	0	0	0	0	0	0	0	0	0	0	0	0	0	0	0	0	0	0	0	0	0	0	0	0
mmu-mir-714_2_20_+	2	20	..ACGAGGGCCGGTCGGTCG..........................................................................................	18	ACGAGGGCCGGTCGGTCG	30	2.4075	0.0245663	0	0.1976	0.37	0.3232	0	0	0.1687	0.3751	0.0982	0	0	0	0	0	0	0	0	0	0	0	0	0	0	0	0	0	0	0	0	0	0	0	0	0	0	0	0	0	0	0	0
mmu-mir-714_21_51_+	21	51	.....................CCTGCGGTGGTTGTCTGTGTGTGTTTGGGT...........................................................	30	CCTGCGGTGGTTGTCTGTGTGTGTTTGGGT	30	1.6495	0.0168316	0	0	0	0	0	0	1.462	0.1875	0	0	0	0	0	0	0	0	0	0	0	0	0	0	0	0	0	0	0	0	0	0	0	0	0	0	0	0	0	0	0	0	0
mmu-mir-714_53_77_+	53	77	.....................................................TGCGCTGGGGGAGGCGGGGTCGAC.................................	24	TGCGCTGGGGGAGGCGGGGTCGAC	30	2.6355	0.0268929	0	0	0.2467	0.3232	0.1407	0.3058	0	0.2813	0.0982	0	0	0	0	0	0	0	0	0	0	0	0	0	0	0	0	0	0	0	0.723	0	0	0	0	0	0	0	0	0	0	0	0
mmu-mir-714_80_106_+	80	106	................................................................................TCGCGGGGTTGGCGCGGTCGCCCGGC....	26	TCGCGGGGTTGGCGCGGTCGCCCGGC	30	1.7254	0.0176061	0.3033	0.0988	0.9251	0.1616	0	0	0	0.1875	0.0491	0	0	0	0	0	0	0	0	0	0	0	0	0	0	0	0	0	0	0	0	0	0	0	0	0	0	0	0	0	0	0	0
mmu-mir-714_34_52_+	34	52	..................................TCTGTGTGTGTTTGGGTC..........................................................	18	TCTGTGTGTGTTTGGGTC	29	4.148	0.0423265	0	0	0.2467	0.2155	0	0	0	0	0	0	0	0	0	0	0	0	0	0	0	0	0	0	0	0	0	0	0	0	0.3615	0	0	0	0	0	0	0	0	0	0	0	0
mmu-mir-714_69_88_+	69	88	.....................................................................GGGTCGACCGCTCGCGGGG......................	19	GGGTCGACCGCTCGCGGGG	29	4.8508	0.049498	0	0	0	0	0	0	0	0	0.0491	0	0	0	0	0	0	0	0	0	0	0	0	0	0	0	0	0	0	0	0	0	0	0	0	0	0	0	0	0	0	0	0
mmu-mir-714_82_102_+	82	102	..................................................................................GCGGGGTTGGCGCGGTCGCC........	20	GCGGGGTTGGCGCGGTCGCC	29	1.9912	0.0203184	0.1213	0.3458	0.185	0.0539	0.1876	0	0	0.1875	0.2454	0	0	0	0	0	0	0	0	0	0	0	0	0	0	0	0	0	0	0	0.3615	0	0	0	0	0.1894	0	0	0	0	0	0	0
mmu-mir-714_53_75_+	53	75	.....................................................TGCGCTGGGGGAGGCGGGGTCG...................................	22	TGCGCTGGGGGAGGCGGGGTCG	28	4.2164	0.0430245	0	0.0988	0	0	0.1876	0	0	0.0938	0.0982	0	0	0	0	0	0	0	0	0	0	0	0	0	0	0	0	0	0	0	0	0	0	0	0	0	0	0	0	0	0	0	0
mmu-mir-714_73_97_+	73	97	.........................................................................CGACCGCTCGCGGGGTTGGCGCGG.............	24	CGACCGCTCGCGGGGTTGGCGCGG	28	5.2941	0.0540214	0	0	0	0	0	0	0	0	0	0	0	0	0	0	0	0	0	0	0	0	0	0	0	0	0	0	0	0	0.3615	0	0	0	0	0	0	0	0	0	0	0	0
mmu-mir-714_0_20_+	0	20	CGACGAGGGCCGGTCGGTCG..........................................................................................	20	CGACGAGGGCCGGTCGGTCG	27	2.1663	0.0221051	0.182	0	0.37	0	0	0	0.6748	0.0469	0	0	0	0	0	0	0	0	0	0	0	0	0	0	0	0	0	0	0	0	0	0	0	0	0	0	0	0	0	0	0	0	0
mmu-mir-714_31_52_+	31	52	...............................TTGTCTGTGTGTGTTTGGGTC..........................................................	21	TTGTCTGTGTGTGTTTGGGTC	27	2.1625	0.0220663	0.2426	0	0	0.1616	0	0	0.0562	0.0469	0.1472	0	0	0	0	0	0	0	0	0	0	0	0	0	0	0	0	0	0	0	0	0	0	0	0	0	0	0	0	0	0	0	0
mmu-mir-714_32_50_+	32	50	................................TGTCTGTGTGTGTTTGGG............................................................	18	TGTCTGTGTGTGTTTGGG	27	3.2704	0.0333714	0	0.0988	0	0	0	0.1835	0	0.0938	0	0	0	0	0	0	0	0	0	0	0	0	0	0	0	0	0	0	0	0	0	0	0	0	0	0	0	0	0	0	0	0	0
mmu-mir-714_32_52_+	32	52	................................TGTCTGTGTGTGTTTGGGTC..........................................................	20	TGTCTGTGTGTGTTTGGGTC	27	3.5493	0.0362173	0	0	0	0.0539	0	0	0.3374	0	0	0	0	0	0	0	0	0	0	0	0	0	0	0	0	0	0	0	0	0	0.723	0	0	0	0	0	0	0	0	0	0	0	0
mmu-mir-714_53_76_+	53	76	.....................................................TGCGCTGGGGGAGGCGGGGTCGA..................................	23	TGCGCTGGGGGAGGCGGGGTCGA	27	8.2502	0.0841857	0	0	0	0.0539	0	0	0	0	0	0	0	0	0	0	0	0	0	0	0	0	0	0	0	0	0	0	0	0	1.0845	0	0	0	0	0	0	0	0	0	0	0	0
mmu-mir-714_82_100_+	82	100	..................................................................................GCGGGGTTGGCGCGGTCG..........	18	GCGGGGTTGGCGCGGTCG	27	2.1111	0.0215418	0.4246	0	0.1233	0.0539	0.0938	0	0	0.1875	0.2454	0	0	0	0	0	0	0	0	0	0	0	0	0	0	0	0	0	0	0	0.3615	0	0	0	0	0	0	0	0	0	0	0	0
mmu-mir-714_5_28_+	5	28	.....AGGGCCGGTCGGTCGCCCTGCGG..................................................................................	23	AGGGCCGGTCGGTCGCCCTGCGG	26	5.9333	0.0605439	0	0	0	0	0	0	0	0	0	0	0	0	0	0	0	0	0	0	0	0	0	0	0.8775	0	0	0	0	0	0	0	0	0	0	0	0	0	0	0	0	0	0
mmu-mir-714_10_32_+	10	32	..........CGGTCGGTCGCCCTGCGGTGGT..............................................................................	22	CGGTCGGTCGCCCTGCGGTGGT	26	1.5071	0.0153786	0.2426	0.0988	0	0.2155	0	0	0.1687	0.1875	0.1963	0	0	0	0	0	0	0	0	0	0	0	0	0	0	0	0	0	0	0	0	0	0	0	0	0	0	0	0	0	0	0	0
mmu-mir-714_12_36_+	12	36	............GTCGGTCGCCCTGCGGTGGTTGTC..........................................................................	24	GTCGGTCGCCCTGCGGTGGTTGTC	26	2.5906	0.0264347	0.182	0	0	0	0	0	0	0.5157	0.0491	0	0	0	0	0	0	0	0	0	0	0	0	0	0	0	0	0	0	0	0.3615	0	0	0	0	0	0	0	0	0	0	0	0
mmu-mir-714_33_52_+	33	52	.................................GTCTGTGTGTGTTTGGGTC..........................................................	19	GTCTGTGTGTGTTTGGGTC	26	2.496	0.0254694	0	0	0.0617	0.0539	0.2815	0	0.1125	0.1406	0.0982	0	0	0	0	0	0	0	0	0	0	0	0	0	0	0	0	0	0	0	0.723	0	0	0	0	0	0	0	0	0	0	0	0
mmu-mir-714_51_70_+	51	70	...................................................CTTGCGCTGGGGGAGGCGG........................................	19	CTTGCGCTGGGGGAGGCGG	26	2.8085	0.0286582	0	0	0	0	0	0	0	0	0	0	0	0	0	0	0	0	0	0	0	0	0	0	0	0	0	0	0	0	0	0	0	0	0	0	0	0	0	0	0	0	0
mmu-mir-714_8_36_+	8	36	........GCCGGTCGGTCGCCCTGCGGTGGTTGTC..........................................................................	28	GCCGGTCGGTCGCCCTGCGGTGGTTGTC	25	2.8805	0.0293929	0	0	0	0.1616	0	0	0.6748	0.1875	0.0491	0	0	0	0	0	0	0	0	0	0	0	0	0	0	0	0	0	0	0	1.8075	0	0	0	0	0	0	0	0	0	0	0	0
mmu-mir-714_22_40_+	22	40	......................CTGCGGTGGTTGTCTGTG......................................................................	18	CTGCGGTGGTTGTCTGTG	25	22.6363	0.230983	0	0.0988	0.185	0.1077	0	0	0.6186	0.0469	0.1963	0	0	0	0	0	0	0	0	0	0	0	0	0	0	0	0	0	0	0	0	0	0	0	0	0	0	0	0	0	0	0	0
mmu-mir-714_31_59_+	31	59	...............................TTGTCTGTGTGTGTTTGGGTCTTGCGCT...................................................	28	TTGTCTGTGTGTGTTTGGGTCTTGCGCT	25	1.6714	0.0170551	0	0	0	0	0	0	1.1809	0.0938	0	0	0	0	0	0	0	0	0	0	0	0	0	0	0	0	0	0	0	0	0	0	0	0	0	0	0	0	0	0	0	0	0
mmu-mir-714_51_69_+	51	69	...................................................CTTGCGCTGGGGGAGGCG.........................................	18	CTTGCGCTGGGGGAGGCG	25	2.3845	0.0243316	0.2426	0	0	0	0	0.1223	0	0.0469	0.0982	0	0	0	0	0	0	0	0	0	0	0	0	0	0	0	0	0	0	0	0	0	0	0	0	0	0	0	0	0	0	0	0
mmu-mir-714_56_79_+	56	79	........................................................GCTGGGGGAGGCGGGGTCGACCG...............................	23	GCTGGGGGAGGCGGGGTCGACCG	25	1.4058	0.0143449	0	0	0	0	0	0	1.4058	0	0	0	0	0	0	0	0	0	0	0	0	0	0	0	0	0	0	0	0	0	0	0	0	0	0	0	0	0	0	0	0	0	0
mmu-mir-714_52_70_+	52	70	....................................................TTGCGCTGGGGGAGGCGG........................................	18	TTGCGCTGGGGGAGGCGG	24	3.2283	0.0329418	0.5459	0.0988	0	0	0	0	0	0	0	0	0	0	0	0	0	0	0	0	0	0	0	0	0	0	0	0	0	0	0	0	0	0	0	0	0	0	0	0	0	0	0
mmu-mir-714_52_80_+	52	80	....................................................TTGCGCTGGGGGAGGCGGGGTCGACCGC..............................	28	TTGCGCTGGGGGAGGCGGGGTCGACCGC	24	1.3005	0.0132704	0	0.1482	0.185	0.1077	0	0	0.6186	0.0938	0.1472	0	0	0	0	0	0	0	0	0	0	0	0	0	0	0	0	0	0	0	0	0	0	0	0	0	0	0	0	0	0	0	0
mmu-mir-714_88_108_+	88	108	........................................................................................TTGGCGCGGTCGCCCGGCGC..	20	TTGGCGCGGTCGCCCGGCGC	24	1.2439	0.0126929	0.3033	0	0.3084	0.1077	0	0.1223	0	0.2344	0.1472	0	0	0	0	0	0	0	0	0	0	0	0	0	0	0	0	0	0	0	0	0	0	0	0	0	0	0	0	0	0	0	0
mmu-mir-714_44_65_+	44	65	............................................TTTGGGTCTTGCGCTGGGGGA.............................................	21	TTTGGGTCTTGCGCTGGGGGA	23	1.6576	0.0169143	0.2426	0.0988	0.2467	0.0539	0	0	0.5061	0	0	0	0	0	0	0	0	0	0	0	0	0	0	0	0	0	0	0	0	0	0	0	0	0	0	0	0	0	0	0	0	0	0
mmu-mir-714_58_77_+	58	77	..........................................................TGGGGGAGGCGGGGTCGAC.................................	19	TGGGGGAGGCGGGGTCGAC	23	1.3242	0.0135122	0.182	0.4446	0	0.1077	0	0.1223	0	0.0938	0	0	0	0	0	0	0	0	0	0	0	0	0	0	0	0	0	0	0	0	0	0	0	0	0	0	0	0	0	0	0	0	0
mmu-mir-714_91_110_+	91	110	...........................................................................................GCGCGGTCGCCCGGCGCCG	19	GCGCGGTCGCCCGGCGCCG	23	1.3126	0.0133939	0.2426	0.0988	0.2467	0.0539	0	0	0	0.3282	0.1963	0	0	0	0	0	0	0	0	0	0	0	0	0	0	0	0	0	0	0	0	0	0	0	0	0	0	0	0	0	0	0	0
mmu-mir-714_3_22_+	3	22	...CGAGGGCCGGTCGGTCGCC........................................................................................	19	CGAGGGCCGGTCGGTCGCC	22	1.4335	0.0146276	0	0.0988	0.1233	0.1616	0	0	0.1125	0.0469	0.4417	0	0	0	0	0	0	0	0	0	0	0	0	0	0	0	0	0	0	0	0	0	0	0	0	0	0	0	0	0	0	0	0
mmu-mir-714_23_50_+	23	50	.......................TGCGGTGGTTGTCTGTGTGTGTTTGGG............................................................	27	TGCGGTGGTTGTCTGTGTGTGTTTGGG	22	5.7738	0.0589163	0.182	0	0	0.1077	0.0938	0.0612	0.6186	0.0469	0	0	0	0	0	0	0	0	0	0	0	0	0	0	0	0	0	0	0	0	0	0	0	0	0	0	0	0	0	0	0	0	0
mmu-mir-714_23_53_+	23	53	.......................TGCGGTGGTTGTCTGTGTGTGTTTGGGTCT.........................................................	30	TGCGGTGGTTGTCTGTGTGTGTTTGGGTCT	22	2.1725	0.0221684	0	0	0.6784	0.2155	0	0	0	0.0469	0.1472	0	0	0	0	0	0	0	0	0	0	0	0	0	0	0	0	0	0	0	1.0845	0	0	0	0	0	0	0	0	0	0	0	0
mmu-mir-714_24_46_+	24	46	........................GCGGTGGTTGTCTGTGTGTGTT................................................................	22	GCGGTGGTTGTCTGTGTGTGTT	22	3.6306	0.0370469	0	0	0.37	0.1077	0	0	0	0.0469	0.1472	0	0	0	0	0	0	0	0	0	0	0	0	0	0	0	0	0	0	0	1.0845	0	0	0	0	0	0	0	0	0	0	0	0
mmu-mir-714_26_51_+	26	51	..........................GGTGGTTGTCTGTGTGTGTTTGGGT...........................................................	25	GGTGGTTGTCTGTGTGTGTTTGGGT	22	1.9687	0.0200888	0	0	0	0.2155	0	0	0.731	0.0469	0	0	0	0	0	0	0	0	0	0	0	0	0	0	0	0	0	0	0	0	0.723	0	0	0	0	0	0	0	0	0	0	0	0
mmu-mir-714_26_52_+	26	52	..........................GGTGGTTGTCTGTGTGTGTTTGGGTC..........................................................	26	GGTGGTTGTCTGTGTGTGTTTGGGTC	22	3.7471	0.0382357	0	0.1482	0	0	0	0	0.8435	0	0	0	0	0	0	0	0	0	0	0	0	0	0	0	0	0	0	0	0	0	0.3615	0	0	0	0	0	0	0	0	0	0	0	0
mmu-mir-714_40_58_+	40	58	........................................TGTGTTTGGGTCTTGCGC....................................................	18	TGTGTTTGGGTCTTGCGC	22	2.7169	0.0277235	0	0	0	0	0	0	0.3936	0	0	0	0	0	0	0	0	0	0	0	0	0	0	0	0	0	0	0	0	0	0.3615	0	0	0	0	0	0	0	0	0	0	0	0
mmu-mir-714_57_75_+	57	75	.........................................................CTGGGGGAGGCGGGGTCG...................................	18	CTGGGGGAGGCGGGGTCG	22	1.4722	0.0150224	0	0.1976	0.6167	0.2155	0	0	0	0.0469	0.0491	0	0	0	0	0	0	0	0	0	0	0	0	0	0	0	0	0	0	0	0	0	0	0	0	0	0	0	0	0	0	0	0
mmu-mir-714_4_22_+	4	22	....GAGGGCCGGTCGGTCGCC........................................................................................	18	GAGGGCCGGTCGGTCGCC	21	3.2175	0.0328316	0	0.0494	0.185	0.1616	0.0469	0	0	0.3282	0	0	0	0	0	0	0	0	0	0	0.7244	0.669	0	0	0	0	0	0	0	0	0.3615	0	0	0	0	0	0	0	0	0	0	0	0
mmu-mir-714_24_44_+	24	44	........................GCGGTGGTTGTCTGTGTGTG..................................................................	20	GCGGTGGTTGTCTGTGTGTG	21	22.4805	0.229393	0	0	0	0	0	0	0.4499	0	0	0	0	0	0	0	0	0	0	0	0	0	0	0	0	0	0	0	0	0	0.723	0	0	0	0	0	0	0	0	0	0	0	0
mmu-mir-714_76_95_+	76	95	............................................................................CCGCTCGCGGGGTTGGCGC...............	19	CCGCTCGCGGGGTTGGCGC	21	2.3866	0.0243531	0.2426	0	0.4317	0	0	0	0	0.0938	0.0982	0	0	0	0	0	0	0	0	0	0	0	0	0	0	0	0	0	0	0	0	0	0	0	0	0.3789	0	0	0	0	0	0	0
mmu-mir-714_25_53_+	25	53	.........................CGGTGGTTGTCTGTGTGTGTTTGGGTCT.........................................................	28	CGGTGGTTGTCTGTGTGTGTTTGGGTCT	20	1.72	0.017551	0	0.1482	0.2467	0	0	0	0.5061	0.0469	0.0491	0	0	0	0	0	0	0	0	0	0	0	0	0	0	0	0	0	0	0	0.723	0	0	0	0	0	0	0	0	0	0	0	0
mmu-mir-714_27_51_+	27	51	...........................GTGGTTGTCTGTGTGTGTTTGGGT...........................................................	24	GTGGTTGTCTGTGTGTGTTTGGGT	20	2.8234	0.0288102	0	0	0	0	0	0	0.6186	0	0	0	0	0	0	0	0	0	0	0	0	0	0	0	0	0	0	0	0	0	1.446	0	0	0	0	0	0	0	0	0	0	0	0
mmu-mir-714_28_52_+	28	52	............................TGGTTGTCTGTGTGTGTTTGGGTC..........................................................	24	TGGTTGTCTGTGTGTGTTTGGGTC	20	3.2782	0.033451	0	0	0	0	0	0	0	0	0	0	0	0	0	0	0	0	0	0	0	0	0	0	0	0	0	0	0	0	0.723	0	0	0	0	0	0	0	0	0	0	0	0
mmu-mir-714_31_49_+	31	49	...............................TTGTCTGTGTGTGTTTGG.............................................................	18	TTGTCTGTGTGTGTTTGG	20	2.1153	0.0215847	0	0	0	0	0	0	0.7872	0	0	0	0	0	0	0	0	0	0	0	0	0	0	0	0	0	0	0	0	0	0.723	0	0	0	0	0	0	0	0	0	0	0	0
mmu-mir-714_31_56_+	31	56	...............................TTGTCTGTGTGTGTTTGGGTCTTGC......................................................	25	TTGTCTGTGTGTGTTTGGGTCTTGC	20	2.1045	0.0214745	0	0	0	0	0	0.0612	0.8435	0	0	0	0	0	0	0	0	0.7371	0	0	0	0	0	0	0	0	0	0	0	0	0	0	0	0	0	0	0	0	0	0	0	0	0
mmu-mir-714_50_69_+	50	69	..................................................TCTTGCGCTGGGGGAGGCG.........................................	19	TCTTGCGCTGGGGGAGGCG	20	2.775	0.0283163	0	0	0	0	0	0	0	0.0469	0.0982	0	0	0	0	0	0	0	0	0	0	0	0	0	0	0	0	0	0	0	0.3615	0	0	0	0	0	0	0	0	0	0	0	0
mmu-mir-714_53_78_+	53	78	.....................................................TGCGCTGGGGGAGGCGGGGTCGACC................................	25	TGCGCTGGGGGAGGCGGGGTCGACC	20	1.8743	0.0191255	0	0.4446	0	0.1077	0	0	0	0	0.1963	0	0	0	0	0	0	0	0	0	0	0	0	0	0	0	0	0	0	0	0	0	0	0	0	0	0	0	0	0	0	0	0
mmu-mir-714_72_97_+	72	97	........................................................................TCGACCGCTCGCGGGGTTGGCGCGG.............	25	TCGACCGCTCGCGGGGTTGGCGCGG	20	2.8343	0.0289214	0	0	0	0	0	0	0	0	0	0	0	0	0	0	0	0	0	0	0	0	0	0	0	0	0	0	0	0	0	0	0	0	0	0	0	0	0	0	0	0	0
mmu-mir-714_73_91_+	73	91	.........................................................................CGACCGCTCGCGGGGTTG...................	18	CGACCGCTCGCGGGGTTG	20	2.7336	0.0278939	0	0.1976	0.3084	0	0	0	0	0.1406	0	0	0	0	0	0	0	0	0	0	0	0	0	0	0	0	0	0	0	0	0.3615	0	0	0	0	0	0	0	0	0	0	0	0
mmu-mir-714_86_106_+	86	106	......................................................................................GGTTGGCGCGGTCGCCCGGC....	20	GGTTGGCGCGGTCGCCCGGC	20	1.136	0.0115918	0.6672	0.2964	0.1233	0	0	0	0	0	0.0491	0	0	0	0	0	0	0	0	0	0	0	0	0	0	0	0	0	0	0	0	0	0	0	0	0	0	0	0	0	0	0	0
mmu-mir-714_6_26_+	6	26	......GGGCCGGTCGGTCGCCCTGC....................................................................................	20	GGGCCGGTCGGTCGCCCTGC	19	2.7616	0.0281796	0	0.2964	0.4317	0	0	0	0	0	0	0	0	0	0	0	0	0	0	0	0	0	0	0	0	0	0	0	0	0	0	0	0	0	0	0	0	0	0	0	0	0	0
mmu-mir-714_22_46_+	22	46	......................CTGCGGTGGTTGTCTGTGTGTGTT................................................................	24	CTGCGGTGGTTGTCTGTGTGTGTT	19	1.1022	0.0112469	0	0.0494	0	0.1616	0	0	0.7872	0	0	0	0	0	0	0	0	0	0	0	0	0	0	0	0	0	0	0	0	0	0	0	0	0	0	0	0	0	0	0	0	0	0
mmu-mir-714_25_44_+	25	44	.........................CGGTGGTTGTCTGTGTGTG..................................................................	19	CGGTGGTTGTCTGTGTGTG	19	2.9327	0.0299255	0	0.0494	0	0	0	0	0.4499	0.0938	0	0	0	0	0	0	0	0	0	0	0	0	0	0	0	0	0	0	0	0	0	0	0	0	0	0	0.2451	0	0	0	0	0	0
mmu-mir-714_27_48_+	27	48	...........................GTGGTTGTCTGTGTGTGTTTG..............................................................	21	GTGGTTGTCTGTGTGTGTTTG	19	1.8879	0.0192643	0	0	0	0	0	0	0.7872	0	0	0	0	0	0	0	0	0	0	0	0	0	0	0	0	0	0	0	0	0	0.723	0	0	0	0	0	0	0	0	0	0	0	0
mmu-mir-714_30_50_+	30	50	..............................GTTGTCTGTGTGTGTTTGGG............................................................	20	GTTGTCTGTGTGTGTTTGGG	19	1.8137	0.0185071	0	0	0	0.0539	0	0	0.5061	0	0.0491	0	0	0	0	0	0	0	0	0	0	0	0	0	0	0	0	0	0	0	0.3615	0	0	0	0	0	0	0	0	0	0	0	0
mmu-mir-714_73_94_+	73	94	.........................................................................CGACCGCTCGCGGGGTTGGCG................	21	CGACCGCTCGCGGGGTTGGCG	19	1.6485	0.0168214	0.182	0	0	0.1077	0	0	0	0.0938	0.1472	0	0	0	0	0	0	0	0	0	0	0	0	0	0	0	0	0	0	0	0	0	0	0	0	0	0	0	0	0	0	0	0
mmu-mir-714_6_27_+	6	27	......GGGCCGGTCGGTCGCCCTGCG...................................................................................	21	GGGCCGGTCGGTCGCCCTGCG	18	6.2958	0.0642429	0	0	0	0	0	0	0	0	0	0	0	0	0	0	0	0	0	0	0	0	0	0	0	0	0	0	0	0	0	0	0	0	0	0	0	0	0	0	0	0	0
mmu-mir-714_7_27_+	7	27	.......GGCCGGTCGGTCGCCCTGCG...................................................................................	20	GGCCGGTCGGTCGCCCTGCG	18	2.6006	0.0265367	0	0	0.37	0.0539	0	0	0	0.0469	0.1963	0	0	0	0	0	0	0	0	0	0	0	0	0	0	0	0	0	0	0	0	0	0	0	0	0	0	0	0	0	0	0	0
mmu-mir-714_8_26_+	8	26	........GCCGGTCGGTCGCCCTGC....................................................................................	18	GCCGGTCGGTCGCCCTGC	18	1.173	0.0119694	0	0	0	0.1616	0	0	0.2812	0.1875	0.1963	0	0	0	0	0	0	0	0	0	0	0	0	0	0	0	0	0	0	0	0	0	0	0	0	0	0	0	0	0	0	0	0
mmu-mir-714_16_36_+	16	36	................GTCGCCCTGCGGTGGTTGTC..........................................................................	20	GTCGCCCTGCGGTGGTTGTC	18	1.9227	0.0196194	0	0	0.2467	0	0	0	0.4499	0	0	0	0	0	0	0	0	0	0	0	0	0	0	0	0	0	0	0	0	0	0	0	0	0	0	0	0	0	0	0	0	0	0
mmu-mir-714_19_40_+	19	40	...................GCCCTGCGGTGGTTGTCTGTG......................................................................	21	GCCCTGCGGTGGTTGTCTGTG	18	1.3786	0.0140673	0	0	0	0	0	0	0.7872	0	0.0982	0	0	0	0	0	0	0	0	0	0	0	0	0	0	0	0	0	0	0	0	0	0	0	0	0	0	0	0	0	0	0	0
mmu-mir-714_19_44_+	19	44	...................GCCCTGCGGTGGTTGTCTGTGTGTG..................................................................	25	GCCCTGCGGTGGTTGTCTGTGTGTG	18	1.0277	0.0104867	0	0	0	0	0	0	0.9559	0	0	0	0	0	0	0	0	0	0	0	0	0	0	0	0	0	0	0	0	0	0	0	0	0	0	0	0	0	0	0	0	0	0
mmu-mir-714_23_45_+	23	45	.......................TGCGGTGGTTGTCTGTGTGTGT.................................................................	22	TGCGGTGGTTGTCTGTGTGTGT	18	4.2576	0.0434449	0	0	0	0.0539	0.0938	0	0	0.0469	0	0	0	0	0	0	0	0	0	0	0	0.669	0	0	0	0	0	0	0	0	0.3615	0	0	0	0	0	0	0	0	0	0	0	0
mmu-mir-714_25_52_+	25	52	.........................CGGTGGTTGTCTGTGTGTGTTTGGGTC..........................................................	27	CGGTGGTTGTCTGTGTGTGTTTGGGTC	18	2.3251	0.0237255	0	0	0	0	0	0	0.731	0	0	0	0	0	0	0	0	0	0	0	0	0	0	0	0	0	0	0	0	0	1.446	0	0	0	0	0	0	0	0	0	0	0	0
mmu-mir-714_33_51_+	33	51	.................................GTCTGTGTGTGTTTGGGT...........................................................	18	GTCTGTGTGTGTTTGGGT	18	2.2574	0.0230347	0	0	0.185	0	0	0.0612	0	0.2344	0	0	0	0	0	0	0	0	0	0	0	0	0	0	0	0	0	0	0	0	1.0845	0	0	0	0	0	0	0	0	0	0	0	0
mmu-mir-714_34_53_+	34	53	..................................TCTGTGTGTGTTTGGGTCT.........................................................	19	TCTGTGTGTGTTTGGGTCT	18	1.9234	0.0196265	0	0	0	0	0	0	0.3374	0	0	0	0	0	0	0	0	0	0	0	0	0	0	0	0	0	0	0	0	0	0	0	0	0	0	0	0	0.2039	0	0	0	0	0
mmu-mir-714_39_58_+	39	58	.......................................GTGTGTTTGGGTCTTGCGC....................................................	19	GTGTGTTTGGGTCTTGCGC	18	4.0035	0.040852	0	0	0	0	0	0	0.4499	0	0	0	0	0	0	0	0	0	0	0	0	0	0	0	0	0	0	0	0	0	0.3615	0	0	0	0	0	0	0	0	0	0	0	0
mmu-mir-714_40_67_+	40	67	........................................TGTGTTTGGGTCTTGCGCTGGGGGAGG...........................................	27	TGTGTTTGGGTCTTGCGCTGGGGGAGG	18	1.0176	0.0103837	0	0	0.0617	0	0	0	0.9559	0	0	0	0	0	0	0	0	0	0	0	0	0	0	0	0	0	0	0	0	0	0	0	0	0	0	0	0	0	0	0	0	0	0
mmu-mir-714_57_80_+	57	80	.........................................................CTGGGGGAGGCGGGGTCGACCGC..............................	23	CTGGGGGAGGCGGGGTCGACCGC	18	1.4099	0.0143867	0.2426	0.1482	0	0	0.0469	0	0.3374	0.0469	0	0	0	0	0	0	0	0	0	0	0	0	0	0	0	0	0	0	0	0	0.3615	0	0	0	0	0	0	0	0	0	0	0	0
mmu-mir-714_82_105_+	82	105	..................................................................................GCGGGGTTGGCGCGGTCGCCCGG.....	23	GCGGGGTTGGCGCGGTCGCCCGG	18	0.885	0.00903061	0	0	0.0617	0	0	0	0	0.2344	0.5889	0	0	0	0	0	0	0	0	0	0	0	0	0	0	0	0	0	0	0	0	0	0	0	0	0	0	0	0	0	0	0	0
mmu-mir-714_2_22_+	2	22	..ACGAGGGCCGGTCGGTCGCC........................................................................................	20	ACGAGGGCCGGTCGGTCGCC	17	2.1655	0.0220969	0	0	0	0	0	0	0.2812	0.0469	0.0491	0	0	0	0	0	0	0	0	0	0	0	0	0	0	0	0	0	0	0	0	0	0	0	0	0	0	0	0	0	0	0	0
mmu-mir-714_8_28_+	8	28	........GCCGGTCGGTCGCCCTGCGG..................................................................................	20	GCCGGTCGGTCGCCCTGCGG	17	1.0835	0.0110561	0	0	0.185	0	0	0	0.731	0	0	0	0	0	0	0	0	0	0	0	0	0	0	0	0	0	0	0	0	0	0	0	0	0	0	0	0	0	0	0	0	0	0
mmu-mir-714_10_33_+	10	33	..........CGGTCGGTCGCCCTGCGGTGGTT.............................................................................	23	CGGTCGGTCGCCCTGCGGTGGTT	17	0.8165	0.00833163	0.2426	0.1976	0	0	0	0	0.1125	0.0469	0.1963	0	0	0	0	0	0	0	0	0	0	0	0	0	0	0	0	0	0	0	0	0	0	0	0	0	0	0	0	0	0	0	0
mmu-mir-714_12_31_+	12	31	............GTCGGTCGCCCTGCGGTGG...............................................................................	19	GTCGGTCGCCCTGCGGTGG	17	1.3577	0.0138541	0	0	0	0	0	0	0	0.3751	0	0	0	0	0	0	0	0	0	0	0	0	0	0	0	0	0	0	0	0	0	0	0	0	0	0	0	0	0	0	0	0	0
mmu-mir-714_13_31_+	13	31	.............TCGGTCGCCCTGCGGTGG...............................................................................	18	TCGGTCGCCCTGCGGTGG	17	2.8559	0.0291418	0	0	0	0	0	0	0	0	0	0	0	0	0	0	0	0	0	0	0	0	0	0	0	0	0	0	0	0	0	0	0	0	0	0	0	0	0	0	0	0	0
mmu-mir-714_24_42_+	24	42	........................GCGGTGGTTGTCTGTGTG....................................................................	18	GCGGTGGTTGTCTGTGTG	17	4.0333	0.0411561	0	0	0	0	0	0	0	0	0	0	0	0	0	0	0	0	0	0	0	0	0	0	0	0	0	0	0	0	1.446	0	0	0	0	0	0	0	0	0	0	0	0
mmu-mir-714_25_46_+	25	46	.........................CGGTGGTTGTCTGTGTGTGTT................................................................	21	CGGTGGTTGTCTGTGTGTGTT	17	20.5884	0.210086	0	0	0.2467	0	0.1407	0	0.3374	0	0	0	0	0	0	0	0	0	0	0	0	0	0	0	0	0	0	0	0	0	0.3615	0	0	0	0	0	0	0	0	0	0	0	0
mmu-mir-714_26_50_+	26	50	..........................GGTGGTTGTCTGTGTGTGTTTGGG............................................................	24	GGTGGTTGTCTGTGTGTGTTTGGG	17	2.2702	0.0231653	0	0.0988	0	0	0	0	0.5061	0	0	0	0	0	0	0	0	0	0	0	0	0	0	0	0	0	0	0	0	0	1.446	0	0	0	0	0	0	0	0	0	0	0	0
mmu-mir-714_31_58_+	31	58	...............................TTGTCTGTGTGTGTTTGGGTCTTGCGC....................................................	27	TTGTCTGTGTGTGTTTGGGTCTTGCGC	17	0.9736	0.00993469	0.2426	0	0	0	0	0	0.731	0	0	0	0	0	0	0	0	0	0	0	0	0	0	0	0	0	0	0	0	0	0	0	0	0	0	0	0	0	0	0	0	0	0
mmu-mir-714_32_58_+	32	58	................................TGTCTGTGTGTGTTTGGGTCTTGCGC....................................................	26	TGTCTGTGTGTGTTTGGGTCTTGCGC	17	1.079	0.0110102	0	0	0.1233	0	0	0	0.7872	0	0	0	0	0	0	0	0	0	0	0	0	0	0	0	0	0	0	0	0	0	0	0	0	0	0	0	0	0	0	0	0	0	0
mmu-mir-714_41_70_+	41	70	.........................................GTGTTTGGGTCTTGCGCTGGGGGAGGCGG........................................	29	GTGTTTGGGTCTTGCGCTGGGGGAGGCGG	17	20.233	0.206459	0	0	0	0	0	0	0.8435	0	0	0	0	0	0	0	0	0	0	0	0	0	0	0	0	0	0	0	0	0	0	0	0	0	0	0	0	0	0	0	0	0	0
mmu-mir-714_49_67_+	49	67	.................................................GTCTTGCGCTGGGGGAGG...........................................	18	GTCTTGCGCTGGGGGAGG	17	2.8951	0.0295418	0.0607	0	0	0	0	0	0	0.1875	0	0	0	0	0	0	0	0	0	0	0	0	0	0	0	0	0	0	0	0	1.446	0	0	0	0	0.1894	0	0	0	0	0	0	0
mmu-mir-714_72_96_+	72	96	........................................................................TCGACCGCTCGCGGGGTTGGCGCG..............	24	TCGACCGCTCGCGGGGTTGGCGCG	17	4.3935	0.0448316	0	0	0	0	0	0	0	0	0	0	0	0	0	0	0	0	0	0	0	0	0	0	0	0	0	0	0	0	0	0	0	0	0	0	0	0	0	0	0	0	0
mmu-mir-714_19_45_+	19	45	...................GCCCTGCGGTGGTTGTCTGTGTGTGT.................................................................	26	GCCCTGCGGTGGTTGTCTGTGTGTGT	16	1.1242	0.0114714	0	0	0	0	0	0	0.7872	0	0	0	0	0	0	0	0	0	0	0	0	0	0	0	0	0	0	0	0	0	0	0	0	0	0	0	0	0	0	0	0	0	0
mmu-mir-714_21_50_+	21	50	.....................CCTGCGGTGGTTGTCTGTGTGTGTTTGGG............................................................	29	CCTGCGGTGGTTGTCTGTGTGTGTTTGGG	16	0.9296	0.00948571	0	0.247	0.2467	0	0	0	0	0.1406	0.1472	0	0	0	0	0	0	0	0	0	0	0	0	0	0	0	0	0	0	0	0	0	0	0	0	0	0	0	0	0	0	0	0
mmu-mir-714_22_52_+	22	52	......................CTGCGGTGGTTGTCTGTGTGTGTTTGGGTC..........................................................	30	CTGCGGTGGTTGTCTGTGTGTGTTTGGGTC	16	0.8632	0.00880816	0.0607	0.2964	0	0	0	0	0.5061	0	0	0	0	0	0	0	0	0	0	0	0	0	0	0	0	0	0	0	0	0	0	0	0	0	0	0	0	0	0	0	0	0	0
mmu-mir-714_26_53_+	26	53	..........................GGTGGTTGTCTGTGTGTGTTTGGGTCT.........................................................	27	GGTGGTTGTCTGTGTGTGTTTGGGTCT	16	2.0565	0.0209847	0	0	0.1233	0.1077	0	0	0	0.2813	0.0982	0	0	0	0	0	0	0	0	0	0	0	0	0	0	0	0	0	0	0	1.446	0	0	0	0	0	0	0	0	0	0	0	0
mmu-mir-714_40_66_+	40	66	........................................TGTGTTTGGGTCTTGCGCTGGGGGAG............................................	26	TGTGTTTGGGTCTTGCGCTGGGGGAG	16	0.9085	0.00927041	0.1213	0	0	0	0	0	0.7872	0	0	0	0	0	0	0	0	0	0	0	0	0	0	0	0	0	0	0	0	0	0	0	0	0	0	0	0	0	0	0	0	0	0
mmu-mir-714_45_72_+	45	72	.............................................TTGGGTCTTGCGCTGGGGGAGGCGGGG......................................	27	TTGGGTCTTGCGCTGGGGGAGGCGGGG	16	0.8569	0.00874388	0	0	0	0.1616	0	0	0.4499	0	0.2454	0	0	0	0	0	0	0	0	0	0	0	0	0	0	0	0	0	0	0	0	0	0	0	0	0	0	0	0	0	0	0	0
mmu-mir-714_50_70_+	50	70	..................................................TCTTGCGCTGGGGGAGGCGG........................................	20	TCTTGCGCTGGGGGAGGCGG	16	2.1823	0.0222684	0	0	0	0	0	0	0	0	0	0	0	0	0	0	0	0	0	0	0	0	0	0	0	0	0	0	0	0	0	0	0	0	0	0	0	0	0	0	0	0	0
mmu-mir-714_73_95_+	73	95	.........................................................................CGACCGCTCGCGGGGTTGGCGC...............	22	CGACCGCTCGCGGGGTTGGCGC	16	1.3307	0.0135786	0	0	0	0	0	0	0.2249	0.0938	0.0982	0	0	0	0	0	0	0	0	0	0	0	0	0	0	0	0	0	0	0	0	0	0	0	0	0	0	0	0	0	0	0	0
mmu-mir-714_78_107_+	78	107	..............................................................................GCTCGCGGGGTTGGCGCGGTCGCCCGGCG...	29	GCTCGCGGGGTTGGCGCGGTCGCCCGGCG	16	0.8994	0.00917755	0	0	0.37	0	0	0	0.3374	0.0938	0.0982	0	0	0	0	0	0	0	0	0	0	0	0	0	0	0	0	0	0	0	0	0	0	0	0	0	0	0	0	0	0	0	0
mmu-mir-714_23_43_+	23	43	.......................TGCGGTGGTTGTCTGTGTGT...................................................................	20	TGCGGTGGTTGTCTGTGTGT	15	3.2073	0.0327276	0	0.1482	0	0	0	0	0	0	0	0	0	0	0	0	0	0	0	0	0	0	0	0	0	0	0	0	0	0	0	0	0	0	0	0	0	0	0	0	0	0	0
mmu-mir-714_23_49_+	23	49	.......................TGCGGTGGTTGTCTGTGTGTGTTTGG.............................................................	26	TGCGGTGGTTGTCTGTGTGTGTTTGG	15	3.2788	0.0334571	0	0.0494	0	0	0	0	0.3374	0	0	0	0	0	0	0	0	0	0	0	0	0	0	0	0	0	0	0	0	0	2.892	0	0	0	0	0	0	0	0	0	0	0	0
mmu-mir-714_26_46_+	26	46	..........................GGTGGTTGTCTGTGTGTGTT................................................................	20	GGTGGTTGTCTGTGTGTGTT	15	2.2964	0.0234327	0	0	0	0.1077	0	0.2447	0	0.1406	0.0491	0	0	0	0	0	0	0	0	0	0	0	0	0	0	0	0	0	0	0	1.0845	0	0	0	0	0	0.2451	0	0	0	0	0	0
mmu-mir-714_28_49_+	28	49	............................TGGTTGTCTGTGTGTGTTTGG.............................................................	21	TGGTTGTCTGTGTGTGTTTGG	15	1.8861	0.0192459	0	0	0	0	0	0	0.731	0	0	0	0	0	0	0	0	0	0	0	0	0	0	0	0	0.7304	0	0	0	0	0	0	0	0	0	0	0	0	0	0	0	0	0
mmu-mir-714_52_77_+	52	77	....................................................TTGCGCTGGGGGAGGCGGGGTCGAC.................................	25	TTGCGCTGGGGGAGGCGGGGTCGAC	15	1.2483	0.0127378	0	0.1482	0.0617	0.0539	0	0.1223	0	0.0469	0.0982	0	0	0	0	0	0	0	0	0	0	0	0	0	0	0	0	0	0	0	0.3615	0	0	0	0	0	0	0	0	0	0	0	0
mmu-mir-714_53_74_+	53	74	.....................................................TGCGCTGGGGGAGGCGGGGTC....................................	21	TGCGCTGGGGGAGGCGGGGTC	15	2.2179	0.0226316	0	0	0.3084	0	0	0.1835	0	0	0.0491	0	0	0	0	0	0	0	0	0	0	0	0	0	0	0	0	0	0	0	0.723	0	0	0	0	0	0	0	0	0	0	0	0
mmu-mir-714_76_96_+	76	96	............................................................................CCGCTCGCGGGGTTGGCGCG..............	20	CCGCTCGCGGGGTTGGCGCG	15	3.3369	0.03405	0.1213	0	0	0	0	0.1223	0	0	0.1472	0	0	0	0	0	0	0	0	0	0.7244	0	0	0	0.8775	0	0	0	0	0	0	0	0	0	0	0	0	0	0	0	0	0	0
mmu-mir-714_20_39_+	20	39	....................CCCTGCGGTGGTTGTCTGT.......................................................................	19	CCCTGCGGTGGTTGTCTGT	14	1.5906	0.0162306	0	0	0	0	0	0	0.5061	0.0469	0	0	0	0	0	0	0	0	0	0	0	0	0	0	0	0	0	0	0	0	0.723	0	0	0	0	0	0	0	0	0	0	0	0
mmu-mir-714_24_43_+	24	43	........................GCGGTGGTTGTCTGTGTGT...................................................................	19	GCGGTGGTTGTCTGTGTGT	14	7.5936	0.0774857	0	0	0	0	0.0469	0	0	0	0	0	0	0	0	0	0	0	0	0	0	0	0	0	0	0	0	0	0	0	0.723	0	0	0	0	0	0	0	0	0	0	0	0
mmu-mir-714_24_49_+	24	49	........................GCGGTGGTTGTCTGTGTGTGTTTGG.............................................................	25	GCGGTGGTTGTCTGTGTGTGTTTGG	14	22.8726	0.233394	0	0	0	0	0	0	0	0	0.0491	0	0	0	0	0	0	0	0	0	0	0	0	0	0	0	0	0	0	0	3.2536	0	0	0	0	0	0	0	0	0	0	0	0
mmu-mir-714_24_50_+	24	50	........................GCGGTGGTTGTCTGTGTGTGTTTGGG............................................................	26	GCGGTGGTTGTCTGTGTGTGTTTGGG	14	4.0487	0.0413133	0	0	0	0	0	0	0	0.3282	0.0491	0	0	0	0	0	0	0	0	0	0	0	0	0	0	0	0	0	0	0	1.0845	0	0	0	0	0	0	0	0	0	0	0	0
mmu-mir-714_29_52_+	29	52	.............................GGTTGTCTGTGTGTGTTTGGGTC..........................................................	23	GGTTGTCTGTGTGTGTTTGGGTC	14	0.9633	0.00982959	0	0	0	0	0	0	0.5623	0.0469	0	0	0	0	0	0	0	0	0	0	0	0	0	0	0	0	0	0	0	0	0	0	0	0	0	0	0	0	0	0	0	0	0
mmu-mir-714_34_58_+	34	58	..................................TCTGTGTGTGTTTGGGTCTTGCGC....................................................	24	TCTGTGTGTGTTTGGGTCTTGCGC	14	1.424	0.0145306	0	0	0	0	0	0	0.3936	0	0	0	0	0	0	0	0	0	0	0	0	0	0	0	0	0	0	0	0	0	0	0	0	0	0	0	0	0	0	0	0	0	0
mmu-mir-714_37_59_+	37	59	.....................................GTGTGTGTTTGGGTCTTGCGCT...................................................	22	GTGTGTGTTTGGGTCTTGCGCT	14	4.2002	0.0428592	0	0	0	0	0	0	0	0	0	0	0	0.6999	0	0	0	0	0	0	0	0	0	0	0	0	0	0	0	0	2.169	0	0	0	0	0	0	0	0	0	0	0	0
mmu-mir-714_41_68_+	41	68	.........................................GTGTTTGGGTCTTGCGCTGGGGGAGGC..........................................	27	GTGTTTGGGTCTTGCGCTGGGGGAGGC	14	1.303	0.0132959	0.2426	0	0	0	0	0	0.2812	0	0	0	0	0	0	0	0	0	0	0	0	0	0	0	0	0	0	0	0	0	0	0	0	0	0	0	0	0	0	0	0	0	0
mmu-mir-714_43_61_+	43	61	...........................................GTTTGGGTCTTGCGCTGG.................................................	18	GTTTGGGTCTTGCGCTGG	14	1.1486	0.0117204	0	0	0	0	0	0	0.5623	0	0	0	0	0	0	0	0	0	0	0	0	0	0	0	0	0	0	0	0	0	0	0	0	0	0	0	0	0	0	0	0	0	0
mmu-mir-714_45_63_+	45	63	.............................................TTGGGTCTTGCGCTGGGG...............................................	18	TTGGGTCTTGCGCTGGGG	14	0.919	0.00937755	0.4246	0.247	0	0	0	0	0	0	0.0491	0	0	0	0	0	0	0	0	0	0	0	0	0	0	0	0	0	0	0	0	0	0	0	0	0	0	0	0	0	0	0	0
mmu-mir-714_74_97_+	74	97	..........................................................................GACCGCTCGCGGGGTTGGCGCGG.............	23	GACCGCTCGCGGGGTTGGCGCGG	14	2.2678	0.0231408	0	0	0	0	0	0	0.3936	0	0	0	0	0	0	0	0	0	0	0	0	0	0	0	0	0	0	0	0	0	0	0	0	0	0	0	0	0	0	0	0	0	0
mmu-mir-714_87_108_+	87	108	.......................................................................................GTTGGCGCGGTCGCCCGGCGC..	21	GTTGGCGCGGTCGCCCGGCGC	14	0.7171	0.00731735	0	0.3458	0.1233	0.0539	0	0	0	0.0469	0.1472	0	0	0	0	0	0	0	0	0	0	0	0	0	0	0	0	0	0	0	0	0	0	0	0	0	0	0	0	0	0	0	0
mmu-mir-714_6_28_+	6	28	......GGGCCGGTCGGTCGCCCTGCGG..................................................................................	22	GGGCCGGTCGGTCGCCCTGCGG	13	3.4438	0.0351408	0	0	0	0	0	0	0	0	0	0	0	0	0	0	0	0	0	0	0	0	0	0	0	0	0	0	0	0	0	0	0	0	0	0	0	0	0	0	0	0	0
mmu-mir-714_10_31_+	10	31	..........CGGTCGGTCGCCCTGCGGTGG...............................................................................	21	CGGTCGGTCGCCCTGCGGTGG	13	1.314	0.0134082	0	0	0.185	0	0.0469	0	0	0	0	0	0	0	0	0	0	0	0	0	0	0	0	0	0	0	0	0	0	0	0	0	0	0	0	0	0	0	0	0	0	0	0
mmu-mir-714_22_51_+	22	51	......................CTGCGGTGGTTGTCTGTGTGTGTTTGGGT...........................................................	29	CTGCGGTGGTTGTCTGTGTGTGTTTGGGT	13	0.7062	0.00720612	0	0.1482	0	0	0.0469	0.0612	0.4499	0	0	0	0	0	0	0	0	0	0	0	0	0	0	0	0	0	0	0	0	0	0	0	0	0	0	0	0	0	0	0	0	0	0
mmu-mir-714_50_72_+	50	72	..................................................TCTTGCGCTGGGGGAGGCGGGG......................................	22	TCTTGCGCTGGGGGAGGCGGGG	13	1.3627	0.0139051	0	0	0	0	0	0	0.1687	0	0.1472	0	0	0	0	0	0	0	0	0	0	0	0	0	0	0	0	0	0	0	0.3615	0	0	0	0	0	0	0	0	0	0	0	0
mmu-mir-714_54_77_+	54	77	......................................................GCGCTGGGGGAGGCGGGGTCGAC.................................	23	GCGCTGGGGGAGGCGGGGTCGAC	13	1.9915	0.0203214	0.182	0.0988	0	0.1077	0.0938	0	0	0	0	0	0	0	0	0	0	0	0	0	0	0	0	0	0	0	0	0	0	0	1.0845	0	0	0	0	0	0	0	0	0	0	0	0
mmu-mir-714_58_76_+	58	76	..........................................................TGGGGGAGGCGGGGTCGA..................................	18	TGGGGGAGGCGGGGTCGA	13	1.9337	0.0197316	0	0.1482	0.1233	0	0	0	0	0	0.0982	0	0	0	0	0	0	0	0	0	0	0	0	0	0	0	0	0	0	0	1.446	0	0	0	0	0	0	0	0	0	0	0	0
mmu-mir-714_74_95_+	74	95	..........................................................................GACCGCTCGCGGGGTTGGCGC...............	21	GACCGCTCGCGGGGTTGGCGC	13	0.8574	0.00874898	0.0607	0.2964	0	0.1616	0	0	0	0	0	0	0	0	0	0	0	0	0	0	0	0	0	0	0	0	0	0	0	0	0	0	0	0	0	0	0	0	0	0	0	0	0
mmu-mir-714_83_106_+	83	106	...................................................................................CGGGGTTGGCGCGGTCGCCCGGC....	23	CGGGGTTGGCGCGGTCGCCCGGC	13	1.3212	0.0134816	0.3639	0	0	0.0539	0	0	0	0.2344	0	0	0	0	0	0	0	0	0	0	0	0.669	0	0	0	0	0	0	0	0	0	0	0	0	0	0	0	0	0	0	0	0	0
mmu-mir-714_7_28_+	7	28	.......GGCCGGTCGGTCGCCCTGCGG..................................................................................	21	GGCCGGTCGGTCGCCCTGCGG	12	1.9359	0.0197541	0	0	0.3084	0	0	0	0	0	0	0	0	0	0	0	0	0	0	0	0	0	0	0	0	0	0	0	0	0	0	0	0	0	0	0	0	0	0	0	0	0	0
mmu-mir-714_9_29_+	9	29	.........CCGGTCGGTCGCCCTGCGGT.................................................................................	20	CCGGTCGGTCGCCCTGCGGT	12	1.0259	0.0104684	0	0.0988	0	0	0.0469	0	0.3374	0	0	0	0	0	0	0	0	0	0	0	0	0	0	0	0	0	0	0	0	0	0	0	0	0	0	0	0	0	0	0	0	0	0
mmu-mir-714_9_37_+	9	37	.........CCGGTCGGTCGCCCTGCGGTGGTTGTCT.........................................................................	28	CCGGTCGGTCGCCCTGCGGTGGTTGTCT	12	0.6451	0.00658265	0.2426	0.247	0.0617	0	0	0	0	0.0938	0	0	0	0	0	0	0	0	0	0	0	0	0	0	0	0	0	0	0	0	0	0	0	0	0	0	0	0	0	0	0	0	0
mmu-mir-714_13_34_+	13	34	.............TCGGTCGCCCTGCGGTGGTTG............................................................................	21	TCGGTCGCCCTGCGGTGGTTG	12	2.2889	0.0233561	0	0	0	0	0	0	0	0	0	0	0	0	0	0	0	0	0	0	0	0	0	0	0	0	0	0	0	0	0	0	0	0	0	0	0	0	0	0	0	0	0
mmu-mir-714_20_40_+	20	40	....................CCCTGCGGTGGTTGTCTGTG......................................................................	20	CCCTGCGGTGGTTGTCTGTG	12	0.6805	0.00694388	0	0	0	0	0	0	0.1125	0.4219	0	0	0	0	0	0	0	0	0	0	0	0	0	0	0	0	0	0	0	0	0	0	0	0	0	0	0	0	0	0	0	0	0
mmu-mir-714_22_43_+	22	43	......................CTGCGGTGGTTGTCTGTGTGT...................................................................	21	CTGCGGTGGTTGTCTGTGTGT	12	1.3188	0.0134571	0	0	0	0	0	0	0.3936	0	0.0982	0	0	0	0	0	0	0	0	0	0	0	0	0	0	0	0	0	0	0	0.723	0	0	0	0	0	0	0	0	0	0	0	0
mmu-mir-714_23_41_+	23	41	.......................TGCGGTGGTTGTCTGTGT.....................................................................	18	TGCGGTGGTTGTCTGTGT	12	2.162	0.0220612	0	0	0.185	0	0	0.1223	0	0	0	0	0	0	0	0	0	0	0	0	0	0	0	0	0	0	0	0	0	0	0.723	0	0	0	0	0	0	0	0	0	0	0	0
mmu-mir-714_26_54_+	26	54	..........................GGTGGTTGTCTGTGTGTGTTTGGGTCTT........................................................	28	GGTGGTTGTCTGTGTGTGTTTGGGTCTT	12	1.866	0.0190408	0	0.1482	0	0	0	0	0.2249	0.0469	0	0	0	0	0	0	0	0	0	0	0	0	0	0	0	0	0	0	0	0	1.446	0	0	0	0	0	0	0	0	0	0	0	0
mmu-mir-714_29_53_+	29	53	.............................GGTTGTCTGTGTGTGTTTGGGTCT.........................................................	24	GGTTGTCTGTGTGTGTTTGGGTCT	12	1.2057	0.0123031	0	0	0	0	0	0	0.2249	0	0	0	0	0	0	0	0	0	0	0	0	0	0	0	0	0	0	0	0	0	0	0	0	0	0	0	0	0	0	0	0	0	0
mmu-mir-714_33_53_+	33	53	.................................GTCTGTGTGTGTTTGGGTCT.........................................................	20	GTCTGTGTGTGTTTGGGTCT	12	0.7049	0.00719286	0.182	0.247	0	0	0	0.1835	0	0	0	0	0	0	0	0	0	0	0	0	0	0	0	0	0	0	0	0	0	0	0	0	0	0	0	0	0	0	0	0	0	0	0
mmu-mir-714_35_53_+	35	53	...................................CTGTGTGTGTTTGGGTCT.........................................................	18	CTGTGTGTGTTTGGGTCT	12	1.2651	0.0129092	0	0.2964	0	0	0	0	0	0	0.0491	0	0	0	0	0	0	0	0	0	0	0	0	0	0	0	0	0	0	0	0	0	0	0	0	0	0	0	0	0	0	0	0
mmu-mir-714_42_62_+	42	62	..........................................TGTTTGGGTCTTGCGCTGGG................................................	20	TGTTTGGGTCTTGCGCTGGG	12	1.5763	0.0160847	0	0	0	0	0	0	0.3936	0	0.0982	0	0	0	0	0	0	0	0	0	0	0	0	0	0	0	0	0	0	0	1.0845	0	0	0	0	0	0	0	0	0	0	0	0
mmu-mir-714_45_64_+	45	64	.............................................TTGGGTCTTGCGCTGGGGG..............................................	19	TTGGGTCTTGCGCTGGGGG	12	0.836	0.00853061	0	0.1482	0	0	0	0	0.3936	0	0	0	0	0	0	0	0	0	0	0	0	0	0	0	0	0	0	0	0	0	0	0	0	0	0	0	0	0	0	0	0	0	0
mmu-mir-714_45_71_+	45	71	.............................................TTGGGTCTTGCGCTGGGGGAGGCGGG.......................................	26	TTGGGTCTTGCGCTGGGGGAGGCGGG	12	0.6425	0.00655612	0	0.0988	0	0	0.0938	0	0.4499	0	0	0	0	0	0	0	0	0	0	0	0	0	0	0	0	0	0	0	0	0	0	0	0	0	0	0	0	0	0	0	0	0	0
mmu-mir-714_51_72_+	51	72	...................................................CTTGCGCTGGGGGAGGCGGGG......................................	21	CTTGCGCTGGGGGAGGCGGGG	12	0.9689	0.00988673	0	0	0	0	0.1407	0	0	0.0469	0.0491	0	0	0	0	0	0	0	0	0	0	0	0	0	0	0	0	0	0	0	0	0	0	0	0	0	0	0	0	0	0	0	0
mmu-mir-714_70_88_+	70	88	......................................................................GGTCGACCGCTCGCGGGG......................	18	GGTCGACCGCTCGCGGGG	12	1.2839	0.013101	0	0	0	0	0	0.1223	0	0	0	0	0	0	0	0	0	0	0	0	0	0	0	0	0	0	0	0	0	0	0	0	0	0	0	0	0	0	0	0	0	0	0
mmu-mir-714_83_101_+	83	101	...................................................................................CGGGGTTGGCGCGGTCGC.........	18	CGGGGTTGGCGCGGTCGC	12	0.8732	0.0089102	0	0	0	0	0	0	0.5623	0	0	0	0	0	0	0	0	0	0	0	0	0	0	0	0	0	0	0	0	0	0	0	0	0	0	0	0	0	0	0	0	0	0
mmu-mir-714_5_27_+	5	27	.....AGGGCCGGTCGGTCGCCCTGCG...................................................................................	22	AGGGCCGGTCGGTCGCCCTGCG	11	3.6997	0.037752	0	0	0	0	0	0	0	0	0	0	0	0	0	0	0	0	0	0	0	0	0	0	0	0	0	0	0	0	0	0	0	0	0	0	0	0	0	0	0	0	0
mmu-mir-714_22_42_+	22	42	......................CTGCGGTGGTTGTCTGTGTG....................................................................	20	CTGCGGTGGTTGTCTGTGTG	11	1.7578	0.0179367	0	0	0	0	0.0469	0	0.1125	0	0	0	0	0	0	0	0	0	0	0	0	0	0	0	0	0	0	0	0	0	0.3615	0	0	0	0	0	0	0	0	0	0	0	0
mmu-mir-714_22_45_+	22	45	......................CTGCGGTGGTTGTCTGTGTGTGT.................................................................	23	CTGCGGTGGTTGTCTGTGTGTGT	11	0.5688	0.00580408	0	0.1976	0	0.1077	0	0	0	0.1406	0	0	0	0	0	0	0	0	0	0	0	0	0	0	0	0	0	0	0	0	0	0	0	0	0	0	0	0	0	0	0	0	0
mmu-mir-714_23_52_+	23	52	.......................TGCGGTGGTTGTCTGTGTGTGTTTGGGTC..........................................................	29	TGCGGTGGTTGTCTGTGTGTGTTTGGGTC	11	0.9134	0.00932041	0	0.0494	0.3084	0	0.0469	0	0	0	0.1472	0	0	0	0	0	0	0	0	0	0	0	0	0	0	0	0	0	0	0	0.3615	0	0	0	0	0	0	0	0	0	0	0	0
mmu-mir-714_24_52_+	24	52	........................GCGGTGGTTGTCTGTGTGTGTTTGGGTC..........................................................	28	GCGGTGGTTGTCTGTGTGTGTTTGGGTC	11	1.2299	0.01255	0	0	0.2467	0.0539	0	0	0.1125	0.0938	0	0	0	0	0	0	0	0	0	0	0	0	0	0	0	0	0	0	0	0	0.723	0	0	0	0	0	0	0	0	0	0	0	0
mmu-mir-714_25_55_+	25	55	.........................CGGTGGTTGTCTGTGTGTGTTTGGGTCTTG.......................................................	30	CGGTGGTTGTCTGTGTGTGTTTGGGTCTTG	11	0.8886	0.00906735	0	0	0	0	0	0	0.3374	0.1406	0.0491	0	0	0	0	0	0	0	0	0	0	0	0	0	0	0	0	0	0	0	0.3615	0	0	0	0	0	0	0	0	0	0	0	0
mmu-mir-714_27_49_+	27	49	...........................GTGGTTGTCTGTGTGTGTTTGG.............................................................	22	GTGGTTGTCTGTGTGTGTTTGG	11	1.2059	0.0123051	0	0	0	0	0	0	0.3936	0	0	0	0	0	0	0	0	0	0	0	0	0	0	0	0	0	0	0	0	0	0.3615	0	0	0	0	0	0	0	0	0	0	0	0
mmu-mir-714_30_49_+	30	49	..............................GTTGTCTGTGTGTGTTTGG.............................................................	19	GTTGTCTGTGTGTGTTTGG	11	1.463	0.0149286	0	0	0	0	0	0	0.3936	0	0	0	0	0	0	0	0	0	0	0	0	0	0	0	0	0	0	0	0	0	0.723	0	0	0	0	0	0	0	0	0	0	0	0
mmu-mir-714_30_52_+	30	52	..............................GTTGTCTGTGTGTGTTTGGGTC..........................................................	22	GTTGTCTGTGTGTGTTTGGGTC	11	1.5355	0.0156684	0	0	0	0	0	0	0.3374	0	0	0	0	0	0	0	0	0	0	0	0	0	0	0	0	0	0	0	0	0	0.3615	0	0	0	0	0	0	0	0	0	0	0	0
mmu-mir-714_36_59_+	36	59	....................................TGTGTGTGTTTGGGTCTTGCGCT...................................................	23	TGTGTGTGTTTGGGTCTTGCGCT	11	3.9766	0.0405776	0	0	0	0	0	0	0	0	0	0	0	0	0	0	0	0	0	0	0	0	0	0	0	0	0	0	0	0	3.9766	0	0	0	0	0	0	0	0	0	0	0	0
mmu-mir-714_38_67_+	38	67	......................................TGTGTGTTTGGGTCTTGCGCTGGGGGAGG...........................................	29	TGTGTGTTTGGGTCTTGCGCTGGGGGAGG	11	0.6186	0.00631224	0	0	0	0	0	0	0.6186	0	0	0	0	0	0	0	0	0	0	0	0	0	0	0	0	0	0	0	0	0	0	0	0	0	0	0	0	0	0	0	0	0	0
mmu-mir-714_40_65_+	40	65	........................................TGTGTTTGGGTCTTGCGCTGGGGGA.............................................	25	TGTGTTTGGGTCTTGCGCTGGGGGA	11	0.6186	0.00631224	0	0	0	0	0	0	0.6186	0	0	0	0	0	0	0	0	0	0	0	0	0	0	0	0	0	0	0	0	0	0	0	0	0	0	0	0	0	0	0	0	0	0
mmu-mir-714_52_74_+	52	74	....................................................TTGCGCTGGGGGAGGCGGGGTC....................................	22	TTGCGCTGGGGGAGGCGGGGTC	11	0.8928	0.0091102	0	0.247	0	0.0539	0	0.1223	0	0	0.0491	0	0	0	0	0	0	0	0	0	0	0	0	0	0	0	0	0	0	0	0.3615	0	0	0	0	0	0	0	0	0	0	0	0
mmu-mir-714_52_75_+	52	75	....................................................TTGCGCTGGGGGAGGCGGGGTCG...................................	23	TTGCGCTGGGGGAGGCGGGGTCG	11	0.6081	0.0062051	0.3639	0.1482	0	0	0	0	0	0.0469	0.0491	0	0	0	0	0	0	0	0	0	0	0	0	0	0	0	0	0	0	0	0	0	0	0	0	0	0	0	0	0	0	0	0
mmu-mir-714_54_82_+	54	82	......................................................GCGCTGGGGGAGGCGGGGTCGACCGCTC............................	28	GCGCTGGGGGAGGCGGGGTCGACCGCTC	11	0.6186	0.00631224	0	0	0	0	0	0	0.6186	0	0	0	0	0	0	0	0	0	0	0	0	0	0	0	0	0	0	0	0	0	0	0	0	0	0	0	0	0	0	0	0	0	0
mmu-mir-714_82_109_+	82	109	..................................................................................GCGGGGTTGGCGCGGTCGCCCGGCGCC.	27	GCGGGGTTGGCGCGGTCGCCCGGCGCC	11	0.8483	0.00865612	0	0	0	0.0539	0	0	0	0.1875	0.2454	0	0	0	0	0	0	0	0	0	0	0	0	0	0	0	0	0	0	0	0.3615	0	0	0	0	0	0	0	0	0	0	0	0
mmu-mir-714_10_28_+	10	28	..........CGGTCGGTCGCCCTGCGG..................................................................................	18	CGGTCGGTCGCCCTGCGG	10	0.9435	0.00962755	0.1213	0	0	0	0	0	0	0.0469	0.0491	0	0	0	0	0	0	0	0	0	0	0	0	0	0	0	0	0	0	0	0	0	0	0	0	0	0	0	0	0	0	0	0
mmu-mir-714_22_50_+	22	50	......................CTGCGGTGGTTGTCTGTGTGTGTTTGGG............................................................	28	CTGCGGTGGTTGTCTGTGTGTGTTTGGG	10	0.7199	0.00734592	0.182	0	0.185	0.1077	0	0	0	0.0469	0	0	0	0	0	0	0	0	0	0	0	0	0	0	0	0	0	0	0	0	0	0	0	0	0	0	0	0	0	0	0	0	0
mmu-mir-714_23_51_+	23	51	.......................TGCGGTGGTTGTCTGTGTGTGTTTGGGT...........................................................	28	TGCGGTGGTTGTCTGTGTGTGTTTGGGT	10	0.8325	0.0084949	0	0	0	0.1077	0.0938	0.1223	0	0	0.1472	0	0	0	0	0	0	0	0	0	0	0	0	0	0	0	0	0	0	0	0.3615	0	0	0	0	0	0	0	0	0	0	0	0
mmu-mir-714_24_47_+	24	47	........................GCGGTGGTTGTCTGTGTGTGTTT...............................................................	23	GCGGTGGTTGTCTGTGTGTGTTT	10	15.8164	0.161392	0	0	0	0	0	0	0	0	0	0	0	0	0	0	0	0	0	0	0	0	0	0	0	0	0	0	0	0	1.0845	0	0	0	0	0	0	0	0	0	0	0	0
mmu-mir-714_37_65_+	37	65	.....................................GTGTGTGTTTGGGTCTTGCGCTGGGGGA.............................................	28	GTGTGTGTTTGGGTCTTGCGCTGGGGGA	10	0.5623	0.00573776	0	0	0	0	0	0	0.5623	0	0	0	0	0	0	0	0	0	0	0	0	0	0	0	0	0	0	0	0	0	0	0	0	0	0	0	0	0	0	0	0	0	0
mmu-mir-714_40_60_+	40	60	........................................TGTGTTTGGGTCTTGCGCTG..................................................	20	TGTGTTTGGGTCTTGCGCTG	10	0.7943	0.0081051	0	0	0	0	0	0	0.4499	0	0	0	0	0	0	0	0	0	0	0	0	0	0	0	0	0	0	0	0	0	0	0	0	0	0	0	0	0	0	0	0	0	0
mmu-mir-714_40_62_+	40	62	........................................TGTGTTTGGGTCTTGCGCTGGG................................................	22	TGTGTTTGGGTCTTGCGCTGGG	10	1.0588	0.0108041	0	0	0	0	0	0	0	0.1406	0.0491	0	0	0	0	0	0	0	0	0	0	0	0	0	0	0	0	0	0	0	0	0	0	0	0	0	0	0	0	0	0	0	0
mmu-mir-714_44_66_+	44	66	............................................TTTGGGTCTTGCGCTGGGGGAG............................................	22	TTTGGGTCTTGCGCTGGGGGAG	10	0.5712	0.00582857	0	0.1976	0	0	0	0	0.2812	0	0	0	0	0	0	0	0	0	0	0	0	0	0	0	0	0	0	0	0	0	0	0	0	0	0	0	0	0	0	0	0	0	0
mmu-mir-714_45_66_+	45	66	.............................................TTGGGTCTTGCGCTGGGGGAG............................................	21	TTGGGTCTTGCGCTGGGGGAG	10	0.5773	0.00589082	0.4246	0.0988	0	0.0539	0	0	0	0	0	0	0	0	0	0	0	0	0	0	0	0	0	0	0	0	0	0	0	0	0	0	0	0	0	0	0	0	0	0	0	0	0
mmu-mir-714_48_67_+	48	67	................................................GGTCTTGCGCTGGGGGAGG...........................................	19	GGTCTTGCGCTGGGGGAGG	10	2.7881	0.02845	0	0	0	0	0	0	0	0	0	0	0	0	0	0	0	0	0	0	0	0	0	0	0	0	0	0	0	0	2.169	0	0	0	0	0	0	0	0	0	0	0	0
mmu-mir-714_48_68_+	48	68	................................................GGTCTTGCGCTGGGGGAGGC..........................................	20	GGTCTTGCGCTGGGGGAGGC	10	3.1043	0.0316765	0	0	0	0	0	0	0	0	0	0	0	0	0	0	0	0	0	0	0	0	0	0	0	0	0	0	0	0	2.892	0	0	0	0	0	0	0	0	0	0	0	0
mmu-mir-714_51_71_+	51	71	...................................................CTTGCGCTGGGGGAGGCGGG.......................................	20	CTTGCGCTGGGGGAGGCGGG	10	0.7425	0.00757653	0	0	0	0	0	0.0612	0.1125	0	0.1963	0	0	0	0	0	0	0	0	0	0	0	0	0	0	0	0	0	0	0	0	0	0	0	0	0	0	0	0	0	0	0	0
mmu-mir-714_52_81_+	52	81	....................................................TTGCGCTGGGGGAGGCGGGGTCGACCGCT.............................	29	TTGCGCTGGGGGAGGCGGGGTCGACCGCT	10	0.5132	0.00523673	0.2426	0	0	0	0	0.0612	0.0562	0.0938	0.0491	0	0	0	0	0	0	0	0	0	0	0	0	0	0	0	0	0	0	0	0	0	0	0	0	0	0	0	0	0	0	0	0
mmu-mir-714_53_82_+	53	82	.....................................................TGCGCTGGGGGAGGCGGGGTCGACCGCTC............................	29	TGCGCTGGGGGAGGCGGGGTCGACCGCTC	10	0.535	0.00545918	0	0.1976	0	0	0	0	0.3374	0	0	0	0	0	0	0	0	0	0	0	0	0	0	0	0	0	0	0	0	0	0	0	0	0	0	0	0	0	0	0	0	0	0
mmu-mir-714_55_80_+	55	80	.......................................................CGCTGGGGGAGGCGGGGTCGACCGC..............................	25	CGCTGGGGGAGGCGGGGTCGACCGC	10	0.582	0.00593878	0.0607	0	0	0	0	0	0.1687	0.1406	0.0982	0	0	0	0	0	0	0	0	0	0	0	0	0	0	0	0	0	0	0	0	0	0	0	0	0	0	0	0	0	0	0	0
mmu-mir-714_59_78_+	59	78	...........................................................GGGGGAGGCGGGGTCGACC................................	19	GGGGGAGGCGGGGTCGACC	10	0.9115	0.00930102	0.3033	0	0.2467	0	0	0	0	0	0	0	0	0	0	0	0	0	0	0	0	0	0	0	0	0	0	0	0	0	0.3615	0	0	0	0	0	0	0	0	0	0	0	0
mmu-mir-714_67_95_+	67	95	...................................................................CGGGGTCGACCGCTCGCGGGGTTGGCGC...............	28	CGGGGTCGACCGCTCGCGGGGTTGGCGC	10	0.5508	0.00562041	0.2426	0.247	0	0	0	0.0612	0	0	0	0	0	0	0	0	0	0	0	0	0	0	0	0	0	0	0	0	0	0	0	0	0	0	0	0	0	0	0	0	0	0	0
mmu-mir-714_73_93_+	73	93	.........................................................................CGACCGCTCGCGGGGTTGGC.................	20	CGACCGCTCGCGGGGTTGGC	10	1.3662	0.0139408	0	0	0	0	0	0.0612	0	0.0938	0	0	0	0	0	0	0	0	0	0	0	0	0	0	0	0	0	0	0	0	0	0	0	0	0	0	0	0	0	0	0	0	0
mmu-mir-714_75_96_+	75	96	...........................................................................ACCGCTCGCGGGGTTGGCGCG..............	21	ACCGCTCGCGGGGTTGGCGCG	10	2.0016	0.0204245	0	0	0	0	0	0	0	0	0	0	0	0	0	0	0	0	0	0	0	0	0	0	0	0	0	0	0	0	0	0	0	0	0	0	0	0	0	0	0	0	0
mmu-mir-714_76_97_+	76	97	............................................................................CCGCTCGCGGGGTTGGCGCGG.............	21	CCGCTCGCGGGGTTGGCGCGG	10	2.4924	0.0254327	0	0	0	0	0	0	0	0	0	0	0	0	0	0	0	0	0	0	0	0	0	0	0	0	0	0	0	0	0	0	0	0	0	0	0	0	0	0	0	0	0
mmu-mir-714_79_97_+	79	97	...............................................................................CTCGCGGGGTTGGCGCGG.............	18	CTCGCGGGGTTGGCGCGG	10	1.7634	0.0179939	0	0	0	0	0	0	0	0	0	0	0	0	0	0	0	0	0	0	0	0	0	0	0	0	0	0	0	0	0	0	0	0	0	0	0	0	0	0	0	0	0
mmu-mir-714_83_103_+	83	103	...................................................................................CGGGGTTGGCGCGGTCGCCC.......	20	CGGGGTTGGCGCGGTCGCCC	10	0.6559	0.00669286	0.182	0.1976	0	0	0	0	0	0	0	0	0	0	0	0	0	0	0	0	0	0	0	0	0	0	0	0	0	0	0	0	0	0	0	0	0	0	0	0	0	0	0
mmu-mir-714_0_18_+	0	18	CGACGAGGGCCGGTCGGT............................................................................................	18	CGACGAGGGCCGGTCGGT	9	0.6034	0.00615714	0	0	0	0.377	0	0	0	0	0	0	0	0	0	0	0	0	0	0	0	0	0	0	0	0	0	0	0	0	0	0	0	0	0	0	0	0	0	0	0	0	0
mmu-mir-714_4_24_+	4	24	....GAGGGCCGGTCGGTCGCCCT......................................................................................	20	GAGGGCCGGTCGGTCGCCCT	9	0.8986	0.00916939	0	0	0	0	0	0	0	0.2813	0	0	0	0	0	0	0	0	0	0	0	0	0	0	0	0	0	0	0	0	0	0	0	0	0	0	0	0	0	0	0	0	0
mmu-mir-714_4_34_+	4	34	....GAGGGCCGGTCGGTCGCCCTGCGGTGGTTG............................................................................	30	GAGGGCCGGTCGGTCGCCCTGCGGTGGTTG	9	0.5551	0.00566429	0	0	0.5551	0	0	0	0	0	0	0	0	0	0	0	0	0	0	0	0	0	0	0	0	0	0	0	0	0	0	0	0	0	0	0	0	0	0	0	0	0	0
mmu-mir-714_13_36_+	13	36	.............TCGGTCGCCCTGCGGTGGTTGTC..........................................................................	23	TCGGTCGCCCTGCGGTGGTTGTC	9	1.1686	0.0119245	0	0	0	0	0	0	0.2812	0	0	0	0	0	0	0	0	0	0	0	0	0	0	0	0	0	0	0	0	0	0	0	0	0	0	0	0	0	0	0	0	0	0
mmu-mir-714_14_36_+	14	36	..............CGGTCGCCCTGCGGTGGTTGTC..........................................................................	22	CGGTCGCCCTGCGGTGGTTGTC	9	0.84	0.00857143	0.4246	0	0	0.0539	0	0	0	0	0	0	0	0	0	0	0	0	0	0	0	0	0	0	0	0	0	0	0	0	0.3615	0	0	0	0	0	0	0	0	0	0	0	0
mmu-mir-714_22_49_+	22	49	......................CTGCGGTGGTTGTCTGTGTGTGTTTGG.............................................................	27	CTGCGGTGGTTGTCTGTGTGTGTTTGG	9	0.4781	0.00487857	0	0	0	0	0.1407	0	0.3374	0	0	0	0	0	0	0	0	0	0	0	0	0	0	0	0	0	0	0	0	0	0	0	0	0	0	0	0	0	0	0	0	0	0
mmu-mir-714_23_47_+	23	47	.......................TGCGGTGGTTGTCTGTGTGTGTTT...............................................................	24	TGCGGTGGTTGTCTGTGTGTGTTT	9	33.8936	0.345853	0	0	0	0	0	0	0	0	0	0	0	0	0	0	0	0	0	0	0	0	0	0	0	0	0	0	0	0	0.3615	0	0	0	0	0	0	0	0	0	0	0	0
mmu-mir-714_25_51_+	25	51	.........................CGGTGGTTGTCTGTGTGTGTTTGGGT...........................................................	26	CGGTGGTTGTCTGTGTGTGTTTGGGT	9	20.6091	0.210297	0	0	0	0	0	0	0.2812	0	0	0	0	0	0	0	0	0	0	0	0	0	0	0	0	0	0	0	0	0	1.0845	0	0	0	0	0	0	0	0	0	0	0	0
mmu-mir-714_26_48_+	26	48	..........................GGTGGTTGTCTGTGTGTGTTTG..............................................................	22	GGTGGTTGTCTGTGTGTGTTTG	9	2.4545	0.0250459	0	0	0	0	0	0	0	0	0	0	0	0	0	0	0	0	0	0	0	0	0	0	0	0	0	0	0	0	2.169	0	0	0	0	0	0	0	0	0	0	0	0
mmu-mir-714_26_49_+	26	49	..........................GGTGGTTGTCTGTGTGTGTTTGG.............................................................	23	GGTGGTTGTCTGTGTGTGTTTGG	9	1.64	0.0167347	0	0	0	0	0	0	0	0.1406	0	0	0	0	0	0	0	0	0	0	0	0	0	0	0	0	0	0	0	0	1.0845	0	0	0	0	0	0	0	0	0	0	0	0
mmu-mir-714_28_46_+	28	46	............................TGGTTGTCTGTGTGTGTT................................................................	18	TGGTTGTCTGTGTGTGTT	9	1.7975	0.0183418	0	0	0	0	0	0	0	0	0	0	0	0	0	0	0	0	0	0	0	0	0	0	0	0	0	0	0	0	0	0	0	0	0	0	0	0	0	0	0	0	0
mmu-mir-714_30_57_+	30	57	..............................GTTGTCTGTGTGTGTTTGGGTCTTGCG.....................................................	27	GTTGTCTGTGTGTGTTTGGGTCTTGCG	9	1.0155	0.0103622	0	0	0	0	0	0	0.3374	0	0	0	0	0	0	0	0	0	0	0	0	0	0	0	0	0	0	0	0	0	0.3615	0	0	0	0	0	0	0	0	0	0	0	0
mmu-mir-714_39_60_+	39	60	.......................................GTGTGTTTGGGTCTTGCGCTG..................................................	21	GTGTGTTTGGGTCTTGCGCTG	9	0.8114	0.00827959	0	0	0	0	0	0	0.4499	0	0	0	0	0	0	0	0	0	0	0	0	0	0	0	0	0	0	0	0	0	0.3615	0	0	0	0	0	0	0	0	0	0	0	0
mmu-mir-714_43_64_+	43	64	...........................................GTTTGGGTCTTGCGCTGGGGG..............................................	21	GTTTGGGTCTTGCGCTGGGGG	9	0.8657	0.00883367	0	0	0	0.2155	0	0	0	0	0	0	0	0	0	0	0	0	0	0	0	0	0	0	0	0	0	0	0	0	0	0	0	0	0	0	0	0	0	0	0	0	0
mmu-mir-714_44_63_+	44	63	............................................TTTGGGTCTTGCGCTGGGG...............................................	19	TTTGGGTCTTGCGCTGGGG	9	2.9366	0.0299653	0.2426	0	0	0	0	0	0	0	0	0	0	0	0	0	0	0	0	0	0	0	0	0	0	0	0	0	0	0	0	0	0	0	0	0	0	0	0	0	0	0	0
mmu-mir-714_44_67_+	44	67	............................................TTTGGGTCTTGCGCTGGGGGAGG...........................................	23	TTTGGGTCTTGCGCTGGGGGAGG	9	0.4853	0.00495204	0	0.0988	0	0	0	0	0.3374	0	0.0491	0	0	0	0	0	0	0	0	0	0	0	0	0	0	0	0	0	0	0	0	0	0	0	0	0	0	0	0	0	0	0	0
mmu-mir-714_49_69_+	49	69	.................................................GTCTTGCGCTGGGGGAGGCG.........................................	20	GTCTTGCGCTGGGGGAGGCG	9	1.2387	0.0126398	0	0	0	0	0	0	0	0.0469	0.1963	0	0	0	0	0	0	0	0	0	0	0	0	0	0	0	0	0	0	0	0.723	0	0	0	0	0	0	0	0	0	0	0	0
mmu-mir-714_51_79_+	51	79	...................................................CTTGCGCTGGGGGAGGCGGGGTCGACCG...............................	28	CTTGCGCTGGGGGAGGCGGGGTCGACCG	9	0.4811	0.00490918	0	0	0.2467	0	0	0	0	0.2344	0	0	0	0	0	0	0	0	0	0	0	0	0	0	0	0	0	0	0	0	0	0	0	0	0	0	0	0	0	0	0	0	0
mmu-mir-714_53_73_+	53	73	.....................................................TGCGCTGGGGGAGGCGGGGT.....................................	20	TGCGCTGGGGGAGGCGGGGT	9	0.8339	0.00850918	0	0	0	0.0539	0	0.2447	0	0.0938	0	0	0	0	0	0	0	0	0	0	0	0	0	0	0	0	0	0	0	0	0.3615	0	0	0	0	0	0	0	0	0	0	0	0
mmu-mir-714_70_98_+	70	98	......................................................................GGTCGACCGCTCGCGGGGTTGGCGCGGT............	28	GGTCGACCGCTCGCGGGGTTGGCGCGGT	9	0.6482	0.00661429	0	0	0	0	0	0	0.4499	0	0	0	0	0	0	0	0	0	0	0	0	0	0	0	0	0	0	0	0	0	0	0	0	0	0	0	0	0	0	0	0	0	0
mmu-mir-714_74_96_+	74	96	..........................................................................GACCGCTCGCGGGGTTGGCGCG..............	22	GACCGCTCGCGGGGTTGGCGCG	9	0.9498	0.00969184	0	0	0	0	0	0.1223	0	0	0.0491	0	0	0	0	0	0	0	0	0	0	0	0	0	0	0	0	0	0	0	0	0	0	0	0	0	0	0	0	0	0	0	0
mmu-mir-714_75_97_+	75	97	...........................................................................ACCGCTCGCGGGGTTGGCGCGG.............	22	ACCGCTCGCGGGGTTGGCGCGG	9	2.5791	0.0263173	0	0	0	0	0	0	0	0	0	0	0	0	0	0	0	0	0	0	0	0	0	0	0	0	0	0	0	0	0	0	0	0	0	0	0	0	0	0	0	0	0
mmu-mir-714_76_100_+	76	100	............................................................................CCGCTCGCGGGGTTGGCGCGGTCG..........	24	CCGCTCGCGGGGTTGGCGCGGTCG	9	0.8204	0.00837143	0.0607	0.1482	0	0	0	0	0	0	0.1472	0	0	0	0	0	0	0	0	0	0	0	0	0	0	0	0	0	0	0	0	0	0	0	0.3182	0	0	0	0	0	0	0	0
mmu-mir-714_77_107_+	77	107	.............................................................................CGCTCGCGGGGTTGGCGCGGTCGCCCGGCG...	30	CGCTCGCGGGGTTGGCGCGGTCGCCCGGCG	9	0.5025	0.00512755	0	0	0.3084	0	0	0	0	0.0469	0.1472	0	0	0	0	0	0	0	0	0	0	0	0	0	0	0	0	0	0	0	0	0	0	0	0	0	0	0	0	0	0	0	0
mmu-mir-714_81_103_+	81	103	.................................................................................CGCGGGGTTGGCGCGGTCGCCC.......	22	CGCGGGGTTGGCGCGGTCGCCC	9	0.5924	0.0060449	0	0	0.4317	0	0	0	0	0.0469	0	0	0	0	0	0	0	0	0	0	0	0	0	0	0	0	0	0	0	0	0	0	0	0	0	0	0	0	0	0	0	0	0
mmu-mir-714_83_102_+	83	102	...................................................................................CGGGGTTGGCGCGGTCGCC........	19	CGGGGTTGGCGCGGTCGCC	9	0.5081	0.00518469	0	0.247	0	0	0	0	0.1687	0	0	0	0	0	0	0	0	0	0	0	0	0	0	0	0	0	0	0	0	0	0	0	0	0	0	0	0	0	0	0	0	0	0
mmu-mir-714_88_107_+	88	107	........................................................................................TTGGCGCGGTCGCCCGGCG...	19	TTGGCGCGGTCGCCCGGCG	9	1.4188	0.0144776	0	0.3458	0	0	0	0	0	0	0	0	0	0	0	0	0	0	0	0	0	0	0	0	0	0	0	0	0	0	0	0	0	0	0	0	0	0	0	0	0	0	0
mmu-mir-714_89_108_+	89	108	.........................................................................................TGGCGCGGTCGCCCGGCGC..	19	TGGCGCGGTCGCCCGGCGC	9	1.1662	0.0119	0.2426	0	0	0	0	0	0	0	0.0491	0	0	0	0	0	0	0	0	0	0	0	0	0	0	0	0	0	0	0	0	0	0	0	0	0	0	0	0	0	0	0	0
mmu-mir-714_3_23_+	3	23	...CGAGGGCCGGTCGGTCGCCC.......................................................................................	20	CGAGGGCCGGTCGGTCGCCC	8	1.1041	0.0112663	0	0	0	0	0	0	0	0	0.0982	0	0	0	0	0	0	0	0	0	0	0	0	0	0	0	0	0	0	0	0	0	0	0	0	0	0	0	0	0	0	0	0
mmu-mir-714_5_26_+	5	26	.....AGGGCCGGTCGGTCGCCCTGC....................................................................................	21	AGGGCCGGTCGGTCGCCCTGC	8	1.2352	0.0126041	0	0	0	0	0	0	0	0.1406	0	0	0	0	0	0	0	0	0	0	0	0	0	0	0	0	0	0	0	0	0	0	0	0	0	0	0	0	0	0	0	0	0
mmu-mir-714_7_36_+	7	36	.......GGCCGGTCGGTCGCCCTGCGGTGGTTGTC..........................................................................	29	GGCCGGTCGGTCGCCCTGCGGTGGTTGTC	8	1.1035	0.0112602	0	0	0	0	0	0	0	0.2344	0	0	0	0	0	0	0	0	0	0	0	0	0	0	0	0	0	0	0	0	0.723	0	0	0	0	0	0	0	0	0	0	0	0
mmu-mir-714_9_32_+	9	32	.........CCGGTCGGTCGCCCTGCGGTGGT..............................................................................	23	CCGGTCGGTCGCCCTGCGGTGGT	8	0.9898	0.0101	0	0	0.2467	0	0	0	0	0	0	0	0	0	0	0	0	0	0	0	0	0	0	0	0	0	0	0	0	0	0	0	0	0	0	0	0	0	0	0	0	0	0
mmu-mir-714_12_34_+	12	34	............GTCGGTCGCCCTGCGGTGGTTG............................................................................	22	GTCGGTCGCCCTGCGGTGGTTG	8	1.4185	0.0144745	0	0	0	0	0	0	0	0	0	0	0	0	0	0	0	0	0	0	0	0	0	0	0	0	0	0	0	0	0	0	0	0	0	0	0	0	0	0	0	0	0
mmu-mir-714_13_40_+	13	40	.............TCGGTCGCCCTGCGGTGGTTGTCTGTG......................................................................	27	TCGGTCGCCCTGCGGTGGTTGTCTGTG	8	1.2355	0.0126071	0	0	0	0	0	0	0.0562	0	0	0	0	0	0	0	0	0	0	0	0	0	0	0	0	0	0	0	0	0	0	0	0	0	0	0	0	0	0	0	0	0	0
mmu-mir-714_19_37_+	19	37	...................GCCCTGCGGTGGTTGTCT.........................................................................	18	GCCCTGCGGTGGTTGTCT	8	0.6362	0.00649184	0	0	0.1233	0	0	0	0	0	0.1963	0	0	0	0	0	0	0	0	0	0	0	0	0	0	0	0	0	0	0	0	0	0	0	0	0	0	0	0	0	0	0	0
mmu-mir-714_19_46_+	19	46	...................GCCCTGCGGTGGTTGTCTGTGTGTGTT................................................................	27	GCCCTGCGGTGGTTGTCTGTGTGTGTT	8	0.4766	0.00486327	0.1213	0	0.3084	0	0	0	0	0.0469	0	0	0	0	0	0	0	0	0	0	0	0	0	0	0	0	0	0	0	0	0	0	0	0	0	0	0	0	0	0	0	0	0
mmu-mir-714_20_50_+	20	50	....................CCCTGCGGTGGTTGTCTGTGTGTGTTTGGG............................................................	30	CCCTGCGGTGGTTGTCTGTGTGTGTTTGGG	8	0.3751	0.00382755	0	0	0	0	0	0	0	0.3751	0	0	0	0	0	0	0	0	0	0	0	0	0	0	0	0	0	0	0	0	0	0	0	0	0	0	0	0	0	0	0	0	0
mmu-mir-714_22_48_+	22	48	......................CTGCGGTGGTTGTCTGTGTGTGTTTG..............................................................	26	CTGCGGTGGTTGTCTGTGTGTGTTTG	8	2.3221	0.0236949	0	0	0	0	0.0469	0	0	0	0	0	0	0	0	0	0	0	0	0	0	0	0	0	0	0	0	0	0	0	2.169	0	0	0	0	0	0	0	0	0	0	0	0
mmu-mir-714_25_49_+	25	49	.........................CGGTGGTTGTCTGTGTGTGTTTGG.............................................................	24	CGGTGGTTGTCTGTGTGTGTTTGG	8	2.4142	0.0246347	0	0	0	0	0	0	0	0.0469	0	0	0	0	0	0	0	0	0	0	0	0	0	0	0	0	0	0	0	0	2.169	0	0	0	0	0	0	0	0	0	0	0	0
mmu-mir-714_26_45_+	26	45	..........................GGTGGTTGTCTGTGTGTGT.................................................................	19	GGTGGTTGTCTGTGTGTGT	8	1.3841	0.0141235	0	0	0	0	0	0	0.1687	0	0	0	0	0	0	0	0	0	0	0	0	0	0	0	0	0	0	0	0	0	0.3615	0	0	0	0	0	0	0	0	0	0	0	0
mmu-mir-714_27_53_+	27	53	...........................GTGGTTGTCTGTGTGTGTTTGGGTCT.........................................................	26	GTGGTTGTCTGTGTGTGTTTGGGTCT	8	0.485	0.00494898	0	0	0	0	0	0	0	0.1406	0.1963	0	0	0	0	0	0	0	0	0	0	0	0	0	0	0	0	0	0	0	0	0	0	0	0	0	0	0	0	0	0	0	0
mmu-mir-714_29_50_+	29	50	.............................GGTTGTCTGTGTGTGTTTGGG............................................................	21	GGTTGTCTGTGTGTGTTTGGG	8	1.3939	0.0142235	0	0	0	0	0	0	0	0	0	0	0	0	0	0	0	0	0	0	0	0	0	0	0	0	0	0	0	0	0	0	0	0	0	0	0	0	0	0	0	0	0
mmu-mir-714_32_51_+	32	51	................................TGTCTGTGTGTGTTTGGGT...........................................................	19	TGTCTGTGTGTGTTTGGGT	8	0.5539	0.00565204	0	0	0	0.1077	0	0	0	0.1875	0	0	0	0	0	0	0	0	0	0	0	0	0	0	0	0	0	0	0	0	0	0	0	0	0	0	0	0	0	0	0	0	0
mmu-mir-714_32_60_+	32	60	................................TGTCTGTGTGTGTTTGGGTCTTGCGCTG..................................................	28	TGTCTGTGTGTGTTTGGGTCTTGCGCTG	8	0.5397	0.00550714	0	0	0	0	0	0	0.3936	0	0	0	0	0	0	0	0	0	0	0	0	0	0	0	0	0	0	0	0	0	0	0	0	0	0	0	0	0	0	0	0	0	0
mmu-mir-714_34_59_+	34	59	..................................TCTGTGTGTGTTTGGGTCTTGCGCT...................................................	25	TCTGTGTGTGTTTGGGTCTTGCGCT	8	1.2025	0.0122704	0	0	0	0	0	0	0.2812	0	0	0	0	0	0	0	0	0	0	0	0	0	0	0	0	0	0	0	0	0	0.723	0	0	0	0	0	0	0	0	0	0	0	0
mmu-mir-714_36_64_+	36	64	....................................TGTGTGTGTTTGGGTCTTGCGCTGGGGG..............................................	28	TGTGTGTGTTTGGGTCTTGCGCTGGGGG	8	0.4499	0.00459082	0	0	0	0	0	0	0.4499	0	0	0	0	0	0	0	0	0	0	0	0	0	0	0	0	0	0	0	0	0	0	0	0	0	0	0	0	0	0	0	0	0	0
mmu-mir-714_37_58_+	37	58	.....................................GTGTGTGTTTGGGTCTTGCGC....................................................	21	GTGTGTGTTTGGGTCTTGCGC	8	1.5426	0.0157408	0	0	0	0	0	0	0	0	0.0491	0	0	0	0	0	0	0	0	0	0	0	0	0	0	0	0	0	0	0	1.0845	0	0	0	0	0	0	0	0	0	0	0	0
mmu-mir-714_42_61_+	42	61	..........................................TGTTTGGGTCTTGCGCTGG.................................................	19	TGTTTGGGTCTTGCGCTGG	8	2.4294	0.0247898	0	0	0	0	0	0	0	0	0	0	0	0	0	0	0	0	0	0	0	0	0	0	0	0	0	0	0	0	2.169	0	0	0	0	0	0	0	0	0	0	0	0
mmu-mir-714_43_63_+	43	63	...........................................GTTTGGGTCTTGCGCTGGGG...............................................	20	GTTTGGGTCTTGCGCTGGGG	8	0.7151	0.00729694	0.2426	0	0	0.0539	0	0	0	0	0	0	0	0	0	0	0	0	0	0	0	0	0	0	0	0	0	0	0	0	0	0	0	0	0	0	0	0	0	0	0	0	0
mmu-mir-714_44_68_+	44	68	............................................TTTGGGTCTTGCGCTGGGGGAGGC..........................................	24	TTTGGGTCTTGCGCTGGGGGAGGC	8	0.6932	0.00707347	0	0	0	0.1077	0	0	0	0	0.1472	0	0	0	0	0	0	0	0	0	0	0	0	0	0	0	0	0	0	0	0	0	0	0	0	0	0	0	0	0	0	0	0
mmu-mir-714_45_67_+	45	67	.............................................TTGGGTCTTGCGCTGGGGGAGG...........................................	22	TTGGGTCTTGCGCTGGGGGAGG	8	0.432	0.00440816	0	0.247	0.185	0	0	0	0	0	0	0	0	0	0	0	0	0	0	0	0	0	0	0	0	0	0	0	0	0	0	0	0	0	0	0	0	0	0	0	0	0	0
mmu-mir-714_47_67_+	47	67	...............................................GGGTCTTGCGCTGGGGGAGG...........................................	20	GGGTCTTGCGCTGGGGGAGG	8	0.5227	0.00533367	0	0	0	0	0	0	0.3936	0	0	0	0	0	0	0	0	0	0	0	0	0	0	0	0	0	0	0	0	0	0	0	0	0	0	0	0	0	0	0	0	0	0
mmu-mir-714_48_66_+	48	66	................................................GGTCTTGCGCTGGGGGAG............................................	18	GGTCTTGCGCTGGGGGAG	8	2.6596	0.0271388	0	0	0	0	0	0	0	0	0	0	0	0	0	0	0	0	0	0	0	0	0	0	0	0	0	0	0	0	2.5305	0	0	0	0	0	0	0	0	0	0	0	0
mmu-mir-714_48_69_+	48	69	................................................GGTCTTGCGCTGGGGGAGGCG.........................................	21	GGTCTTGCGCTGGGGGAGGCG	8	2.7288	0.0278449	0	0	0	0	0	0	0	0	0	0	0	0	0	0	0	0	0	0	0	0	0	0	0	0	0	0	0	0	2.5305	0	0	0	0	0	0	0	0	0	0	0	0
mmu-mir-714_49_68_+	49	68	.................................................GTCTTGCGCTGGGGGAGGC..........................................	19	GTCTTGCGCTGGGGGAGGC	8	1.9084	0.0194735	0	0	0	0	0	0	0	0	0	0	0	0	0	0	0	0	0	0	0	0	0	0	0	0	0	0	0	0	1.0845	0	0	0	0	0	0	0	0	0	0	0	0
mmu-mir-714_50_68_+	50	68	..................................................TCTTGCGCTGGGGGAGGC..........................................	18	TCTTGCGCTGGGGGAGGC	8	0.865	0.00882653	0	0	0.2467	0	0	0	0	0	0	0	0	0	0	0	0	0	0	0	0	0	0	0	0	0	0	0	0	0	0	0	0	0	0	0	0	0	0	0	0	0	0
mmu-mir-714_54_78_+	54	78	......................................................GCGCTGGGGGAGGCGGGGTCGACC................................	24	GCGCTGGGGGAGGCGGGGTCGACC	8	1.3603	0.0138806	0.182	0	0	0	0	0	0	0.0938	0	0	0	0	0	0	0	0	0	0	0	0	0	0	0	0	0	0	0	0	1.0845	0	0	0	0	0	0	0	0	0	0	0	0
mmu-mir-714_54_80_+	54	80	......................................................GCGCTGGGGGAGGCGGGGTCGACCGC..............................	26	GCGCTGGGGGAGGCGGGGTCGACCGC	8	0.3795	0.00387245	0	0	0	0	0	0	0	0.2813	0.0982	0	0	0	0	0	0	0	0	0	0	0	0	0	0	0	0	0	0	0	0	0	0	0	0	0	0	0	0	0	0	0	0
mmu-mir-714_77_96_+	77	96	.............................................................................CGCTCGCGGGGTTGGCGCG..............	19	CGCTCGCGGGGTTGGCGCG	8	1.262	0.0128776	0	0	0	0	0	0	0	0	0	0	0	0	0	0	0	0	0	0	0	0	0	0	0	0	0	0	0	0	0	0	0	0	0	0	0	0	0	0	0	0	0
mmu-mir-714_79_105_+	79	105	...............................................................................CTCGCGGGGTTGGCGCGGTCGCCCGG.....	26	CTCGCGGGGTTGGCGCGGTCGCCCGG	8	0.5666	0.00578163	0.1213	0.247	0	0	0	0	0	0	0	0	0	0	0	0	0	0	0	0	0	0	0	0	0	0	0	0	0	0	0	0	0	0	0	0	0	0	0	0	0	0	0
mmu-mir-714_82_107_+	82	107	..................................................................................GCGGGGTTGGCGCGGTCGCCCGGCG...	25	GCGGGGTTGGCGCGGTCGCCCGGCG	8	0.7582	0.00773673	0.2426	0	0	0.0539	0	0	0	0	0	0	0	0	0	0	0	0	0	0	0	0	0	0	0	0	0	0	0	0	0	0	0	0	0	0	0	0	0	0	0	0	0
mmu-mir-714_0_25_+	0	25	CGACGAGGGCCGGTCGGTCGCCCTG.....................................................................................	25	CGACGAGGGCCGGTCGGTCGCCCTG	7	0.7044	0.00718776	0	0	0	0	0	0	0	0	0	0	0	0	0	0	0	0	0	0	0	0	0	0	0	0	0	0	0	0	0	0	0	0	0	0	0	0	0	0	0	0	0
mmu-mir-714_11_32_+	11	32	...........GGTCGGTCGCCCTGCGGTGGT..............................................................................	21	GGTCGGTCGCCCTGCGGTGGT	7	0.4414	0.00450408	0	0	0	0	0	0	0.3374	0	0	0	0	0	0	0	0	0	0	0	0	0	0	0	0	0	0	0	0	0	0	0	0	0	0	0	0	0	0	0	0	0	0
mmu-mir-714_12_30_+	12	30	............GTCGGTCGCCCTGCGGTG................................................................................	18	GTCGGTCGCCCTGCGGTG	7	0.9312	0.00950204	0	0	0	0	0	0	0	0.0469	0	0	0	0	0	0	0	0	0	0	0	0	0	0	0	0	0	0	0	0	0	0	0	0	0	0	0	0	0	0	0	0	0
mmu-mir-714_16_34_+	16	34	................GTCGCCCTGCGGTGGTTG............................................................................	18	GTCGCCCTGCGGTGGTTG	7	4.422	0.0451224	0	0	0	0	0	0	0	0	0	0	0	0	0	0	0	0	0	0	0	0	0	2.7456	0	0	0	0	0	0	0	0	0	0	0	0	0	0	0	0	0	0	0
mmu-mir-714_16_46_+	16	46	................GTCGCCCTGCGGTGGTTGTCTGTGTGTGTT................................................................	30	GTCGCCCTGCGGTGGTTGTCTGTGTGTGTT	7	0.3936	0.00401633	0	0	0	0	0	0	0.3936	0	0	0	0	0	0	0	0	0	0	0	0	0	0	0	0	0	0	0	0	0	0	0	0	0	0	0	0	0	0	0	0	0	0
mmu-mir-714_17_38_+	17	38	.................TCGCCCTGCGGTGGTTGTCTG........................................................................	21	TCGCCCTGCGGTGGTTGTCTG	7	1.938	0.0197755	0	0	0	0	0	0	0	0	0	0	0	0	0	0	0	0	0	0	0	0	0	0	0	0	0	0	0	0	0	0	0	0	0	0	0	0	0	0	0	0	0
mmu-mir-714_17_42_+	17	42	.................TCGCCCTGCGGTGGTTGTCTGTGTG....................................................................	25	TCGCCCTGCGGTGGTTGTCTGTGTG	7	1.4753	0.0150541	0	0	0	0	0	0	0	0	0	0	0	0	0	0	0	0	0	0	0	0	0	0	0	0	0	0	0	0	0.3615	0	0	0	0	0	0	0	0	0	0	0	0
mmu-mir-714_19_39_+	19	39	...................GCCCTGCGGTGGTTGTCTGT.......................................................................	20	GCCCTGCGGTGGTTGTCTGT	7	1.5614	0.0159327	0	0	0	0	0	0	0	0	0.0491	0	0	0	0	0	0	0	0	0	0	0	0	0	0	0	0	0	0	0	0	0	0	0	0	0	0	0	0	0	0	0	0
mmu-mir-714_19_49_+	19	49	...................GCCCTGCGGTGGTTGTCTGTGTGTGTTTGG.............................................................	30	GCCCTGCGGTGGTTGTCTGTGTGTGTTTGG	7	0.3842	0.00392041	0	0	0	0.2155	0	0	0.1687	0	0	0	0	0	0	0	0	0	0	0	0	0	0	0	0	0	0	0	0	0	0	0	0	0	0	0	0	0	0	0	0	0	0
mmu-mir-714_21_46_+	21	46	.....................CCTGCGGTGGTTGTCTGTGTGTGTT................................................................	25	CCTGCGGTGGTTGTCTGTGTGTGTT	7	0.3469	0.0035398	0	0	0	0	0	0	0.1125	0.2344	0	0	0	0	0	0	0	0	0	0	0	0	0	0	0	0	0	0	0	0	0	0	0	0	0	0	0	0	0	0	0	0	0
mmu-mir-714_24_45_+	24	45	........................GCGGTGGTTGTCTGTGTGTGT.................................................................	21	GCGGTGGTTGTCTGTGTGTGT	7	3.7006	0.0377612	0	0	0	0	0	0	0	0	0	0	0	0	0	0	0	0	0	0	0	0	0	0	0	0	0	0	0	0	1.0845	0	0	0	0	0	0	0	0	0	0	0	0
mmu-mir-714_27_50_+	27	50	...........................GTGGTTGTCTGTGTGTGTTTGGG............................................................	23	GTGGTTGTCTGTGTGTGTTTGGG	7	1.1415	0.011648	0	0	0	0	0	0	0	0.0469	0	0	0	0	0	0	0	0	0	0	0	0	0	0	0	0	0	0	0	0	0	0	0	0	0	0	0	0	0	0	0	0	0
mmu-mir-714_28_51_+	28	51	............................TGGTTGTCTGTGTGTGTTTGGGT...........................................................	23	TGGTTGTCTGTGTGTGTTTGGGT	7	1.3571	0.013848	0	0	0	0	0	0	0	0	0	0	0	0	0	0	0	0	0	0	0	0	0	0	0	0	0	0	0	0	0.723	0	0	0	0	0	0	0	0	0	0	0	0
mmu-mir-714_29_58_+	29	58	.............................GGTTGTCTGTGTGTGTTTGGGTCTTGCGC....................................................	29	GGTTGTCTGTGTGTGTTTGGGTCTTGCGC	7	0.4022	0.00410408	0	0	0.3084	0	0.0938	0	0	0	0	0	0	0	0	0	0	0	0	0	0	0	0	0	0	0	0	0	0	0	0	0	0	0	0	0	0	0	0	0	0	0	0
mmu-mir-714_33_56_+	33	56	.................................GTCTGTGTGTGTTTGGGTCTTGC......................................................	23	GTCTGTGTGTGTTTGGGTCTTGC	7	0.5755	0.00587245	0	0	0	0	0	0	0.2249	0	0	0	0	0	0	0	0	0	0	0	0	0	0	0	0	0	0	0	0	0	0	0	0	0	0	0	0	0	0	0	0	0	0
mmu-mir-714_33_59_+	33	59	.................................GTCTGTGTGTGTTTGGGTCTTGCGCT...................................................	26	GTCTGTGTGTGTTTGGGTCTTGCGCT	7	0.3936	0.00401633	0	0	0	0	0	0	0.3936	0	0	0	0	0	0	0	0	0	0	0	0	0	0	0	0	0	0	0	0	0	0	0	0	0	0	0	0	0	0	0	0	0	0
mmu-mir-714_34_63_+	34	63	..................................TCTGTGTGTGTTTGGGTCTTGCGCTGGGG...............................................	29	TCTGTGTGTGTTTGGGTCTTGCGCTGGGG	7	0.5161	0.00526633	0	0	0.37	0	0	0	0	0	0	0	0	0	0	0	0	0	0	0	0	0	0	0	0	0	0	0	0	0	0	0	0	0	0	0	0	0	0	0	0	0	0
mmu-mir-714_36_58_+	36	58	....................................TGTGTGTGTTTGGGTCTTGCGC....................................................	22	TGTGTGTGTTTGGGTCTTGCGC	7	1.4526	0.0148224	0	0	0	0.0539	0	0	0	0	0	0	0	0	0	0	0	0	0	0	0	0	0	0	0	0	0	0	0	0	1.0845	0	0	0	0	0	0	0	0	0	0	0	0
mmu-mir-714_36_60_+	36	60	....................................TGTGTGTGTTTGGGTCTTGCGCTG..................................................	24	TGTGTGTGTTTGGGTCTTGCGCTG	7	1.2821	0.0130827	0	0.1976	0	0	0	0	0	0	0	0	0	0	0	0	0	0	0	0	0	0	0	0	0	0	0	0	0	0	1.0845	0	0	0	0	0	0	0	0	0	0	0	0
mmu-mir-714_37_60_+	37	60	.....................................GTGTGTGTTTGGGTCTTGCGCTG..................................................	23	GTGTGTGTTTGGGTCTTGCGCTG	7	0.5137	0.00524184	0	0	0	0.1077	0	0	0	0.0469	0.0982	0	0	0	0	0	0	0	0	0	0	0	0	0	0	0	0	0	0	0	0	0	0	0	0	0	0	0	0	0	0	0	0
mmu-mir-714_40_63_+	40	63	........................................TGTGTTTGGGTCTTGCGCTGGGG...............................................	23	TGTGTTTGGGTCTTGCGCTGGGG	7	0.5333	0.00544184	0	0	0	0	0	0	0.2812	0	0	0	0	0	0	0	0	0	0	0	0	0	0	0	0	0	0	0	0	0	0	0	0	0	0	0	0	0	0	0	0	0	0
mmu-mir-714_42_64_+	42	64	..........................................TGTTTGGGTCTTGCGCTGGGGG..............................................	22	TGTTTGGGTCTTGCGCTGGGGG	7	0.4414	0.00450408	0	0	0	0	0	0	0.3374	0	0	0	0	0	0	0	0	0	0	0	0	0	0	0	0	0	0	0	0	0	0	0	0	0	0	0	0	0	0	0	0	0	0
mmu-mir-714_42_68_+	42	68	..........................................TGTTTGGGTCTTGCGCTGGGGGAGGC..........................................	26	TGTTTGGGTCTTGCGCTGGGGGAGGC	7	1.5599	0.0159173	0	0	0	0	0	0	0	0	0	0	0	0	0	0	0	0	0	0	0	0	0	0	0	0	0	0	0	0	0.723	0	0	0	0	0	0	0	0	0	0	0	0
mmu-mir-714_43_65_+	43	65	...........................................GTTTGGGTCTTGCGCTGGGGGA.............................................	22	GTTTGGGTCTTGCGCTGGGGGA	7	0.591	0.00603061	0.3033	0	0	0	0	0	0	0	0	0	0	0	0	0	0	0	0	0	0	0	0	0	0	0	0	0	0	0	0	0	0	0	0	0	0	0	0	0	0	0	0
mmu-mir-714_43_68_+	43	68	...........................................GTTTGGGTCTTGCGCTGGGGGAGGC..........................................	25	GTTTGGGTCTTGCGCTGGGGGAGGC	7	1.5939	0.0162643	0	0	0	0	0	0	0	0	0	0	0	0	0	0	0	0	0	0	0	0	0	0	0	0	0	0	0	0	0.723	0	0	0	0	0	0	0	0	0	0	0	0
mmu-mir-714_45_69_+	45	69	.............................................TTGGGTCTTGCGCTGGGGGAGGCG.........................................	24	TTGGGTCTTGCGCTGGGGGAGGCG	7	0.3936	0.00401633	0	0	0	0	0	0	0.3936	0	0	0	0	0	0	0	0	0	0	0	0	0	0	0	0	0	0	0	0	0	0	0	0	0	0	0	0	0	0	0	0	0	0
mmu-mir-714_45_74_+	45	74	.............................................TTGGGTCTTGCGCTGGGGGAGGCGGGGTC....................................	29	TTGGGTCTTGCGCTGGGGGAGGCGGGGTC	7	0.3408	0.00347755	0	0.247	0	0	0	0	0	0.0938	0	0	0	0	0	0	0	0	0	0	0	0	0	0	0	0	0	0	0	0	0	0	0	0	0	0	0	0	0	0	0	0	0
mmu-mir-714_51_81_+	51	81	...................................................CTTGCGCTGGGGGAGGCGGGGTCGACCGCT.............................	30	CTTGCGCTGGGGGAGGCGGGGTCGACCGCT	7	0.3936	0.00401633	0	0	0	0	0	0	0.3936	0	0	0	0	0	0	0	0	0	0	0	0	0	0	0	0	0	0	0	0	0	0	0	0	0	0	0	0	0	0	0	0	0	0
mmu-mir-714_52_73_+	52	73	....................................................TTGCGCTGGGGGAGGCGGGGT.....................................	21	TTGCGCTGGGGGAGGCGGGGT	7	0.3408	0.00347755	0	0.247	0	0	0	0	0	0.0938	0	0	0	0	0	0	0	0	0	0	0	0	0	0	0	0	0	0	0	0	0	0	0	0	0	0	0	0	0	0	0	0	0
mmu-mir-714_52_76_+	52	76	....................................................TTGCGCTGGGGGAGGCGGGGTCGA..................................	24	TTGCGCTGGGGGAGGCGGGGTCGA	7	0.7207	0.00735408	0	0	0	0.1616	0	0	0	0	0	0	0	0	0	0	0	0	0	0	0	0	0	0	0	0	0	0	0	0	0	0	0	0	0	0	0	0	0	0	0	0	0
mmu-mir-714_52_82_+	52	82	....................................................TTGCGCTGGGGGAGGCGGGGTCGACCGCTC............................	30	TTGCGCTGGGGGAGGCGGGGTCGACCGCTC	7	0.3725	0.00380102	0	0	0.185	0	0	0	0	0.1875	0	0	0	0	0	0	0	0	0	0	0	0	0	0	0	0	0	0	0	0	0	0	0	0	0	0	0	0	0	0	0	0	0
mmu-mir-714_54_74_+	54	74	......................................................GCGCTGGGGGAGGCGGGGTC....................................	20	GCGCTGGGGGAGGCGGGGTC	7	4.3557	0.0444459	0	0.0988	0	0	0	0	0	0	0	0	0	0	0	0	0	0	0	3.0202	0	0.669	0	0	0	0	0	0	0	0	0.3615	0	0	0	0	0	0	0	0	0	0	0	0
mmu-mir-714_54_75_+	54	75	......................................................GCGCTGGGGGAGGCGGGGTCG...................................	21	GCGCTGGGGGAGGCGGGGTCG	7	1.5398	0.0157122	0	0	0	0	0	0	0	0	0	0	0	0	0	0	0	0	0	0	0	0	0	0	0	0	0	0	0	0	1.0845	0	0	0	0	0	0	0	0	0	0	0	0
mmu-mir-714_54_79_+	54	79	......................................................GCGCTGGGGGAGGCGGGGTCGACCG...............................	25	GCGCTGGGGGAGGCGGGGTCGACCG	7	0.3326	0.00339388	0	0	0	0	0	0	0	0.2344	0.0982	0	0	0	0	0	0	0	0	0	0	0	0	0	0	0	0	0	0	0	0	0	0	0	0	0	0	0	0	0	0	0	0
mmu-mir-714_55_79_+	55	79	.......................................................CGCTGGGGGAGGCGGGGTCGACCG...............................	24	CGCTGGGGGAGGCGGGGTCGACCG	7	0.645	0.00658163	0	0	0	0	0	0	0	0.2344	0.0491	0	0	0	0	0	0	0	0	0	0	0	0	0	0	0	0	0	0	0	0.3615	0	0	0	0	0	0	0	0	0	0	0	0
mmu-mir-714_64_91_+	64	91	................................................................AGGCGGGGTCGACCGCTCGCGGGGTTG...................	27	AGGCGGGGTCGACCGCTCGCGGGGTTG	7	0.3452	0.00352245	0	0.247	0	0	0	0	0	0	0.0982	0	0	0	0	0	0	0	0	0	0	0	0	0	0	0	0	0	0	0	0	0	0	0	0	0	0	0	0	0	0	0	0
mmu-mir-714_67_88_+	67	88	...................................................................CGGGGTCGACCGCTCGCGGGG......................	21	CGGGGTCGACCGCTCGCGGGG	7	0.4063	0.00414592	0.3033	0	0	0.0539	0	0	0	0	0.0491	0	0	0	0	0	0	0	0	0	0	0	0	0	0	0	0	0	0	0	0	0	0	0	0	0	0	0	0	0	0	0	0
mmu-mir-714_71_93_+	71	93	.......................................................................GTCGACCGCTCGCGGGGTTGGC.................	22	GTCGACCGCTCGCGGGGTTGGC	7	1.4971	0.0152765	0	0	0	0	0	0	0	0	0	0	0	0	0	0	0	0	0	0	0	0	0	0	0	0	0	0	0	0	0.723	0	0	0	0	0.1894	0	0	0	0	0	0	0
mmu-mir-714_78_98_+	78	98	..............................................................................GCTCGCGGGGTTGGCGCGGT............	20	GCTCGCGGGGTTGGCGCGGT	7	1.4922	0.0152265	0	0	0	0	0	0	0	0	0	0	0	0	0	0	0	0	0	0	0	0	0	0	0	0	0	0	0	0	1.0845	0	0	0	0	0	0.2451	0	0	0	0	0	0
mmu-mir-714_87_107_+	87	107	.......................................................................................GTTGGCGCGGTCGCCCGGCG...	20	GTTGGCGCGGTCGCCCGGCG	7	0.3497	0.00356837	0	0.1976	0	0.0539	0	0	0	0	0.0982	0	0	0	0	0	0	0	0	0	0	0	0	0	0	0	0	0	0	0	0	0	0	0	0	0	0	0	0	0	0	0	0
mmu-mir-714_2_24_+	2	24	..ACGAGGGCCGGTCGGTCGCCCT......................................................................................	22	ACGAGGGCCGGTCGGTCGCCCT	6	0.6522	0.0066551	0	0	0	0	0	0	0	0	0	0	0	0	0	0	0	0	0	0	0	0	0	0	0	0	0	0	0	0	0	0	0	0	0	0	0	0	0	0	0	0	0
mmu-mir-714_10_29_+	10	29	..........CGGTCGGTCGCCCTGCGGT.................................................................................	19	CGGTCGGTCGCCCTGCGGT	6	0.8157	0.00832347	0	0	0	0	0	0	0	0.0938	0	0	0	0	0	0	0	0	0	0	0	0	0	0	0	0	0	0	0	0	0	0	0.2368	0	0	0	0	0	0	0	0	0	0
mmu-mir-714_10_37_+	10	37	..........CGGTCGGTCGCCCTGCGGTGGTTGTCT.........................................................................	27	CGGTCGGTCGCCCTGCGGTGGTTGTCT	6	0.4095	0.00417857	0	0	0	0	0	0	0	0.0938	0.1472	0	0	0	0	0	0	0	0	0	0	0	0	0	0	0	0	0	0	0	0	0	0	0	0	0	0	0	0	0	0	0	0
mmu-mir-714_20_49_+	20	49	....................CCCTGCGGTGGTTGTCTGTGTGTGTTTGG.............................................................	29	CCCTGCGGTGGTTGTCTGTGTGTGTTTGG	6	1.2274	0.0125245	0	0	0	0	0	0	0	0.0938	0.0491	0	0	0	0	0	0	0	0	0	0	0	0	0	0	0	0	0	0	0	1.0845	0	0	0	0	0	0	0	0	0	0	0	0
mmu-mir-714_28_53_+	28	53	............................TGGTTGTCTGTGTGTGTTTGGGTCT.........................................................	25	TGGTTGTCTGTGTGTGTTTGGGTCT	6	0.6327	0.00645612	0	0	0	0	0	0	0.1687	0.0469	0	0	0	0	0	0	0	0	0	0	0	0	0	0	0	0	0	0	0	0	0	0	0	0	0	0	0	0	0	0	0	0	0
mmu-mir-714_29_47_+	29	47	.............................GGTTGTCTGTGTGTGTTT...............................................................	18	GGTTGTCTGTGTGTGTTT	6	1.2168	0.0124163	0	0	0	0	0	0	0	0	0	0	0	0	0	0	0	0	0	0	0	0	0	0	0	0	0	0	0	0	0	0	0	0	0	0	0	0	0	0	0	0	0
mmu-mir-714_29_59_+	29	59	.............................GGTTGTCTGTGTGTGTTTGGGTCTTGCGCT...................................................	30	GGTTGTCTGTGTGTGTTTGGGTCTTGCGCT	6	0.3374	0.00344286	0	0	0	0	0	0	0.3374	0	0	0	0	0	0	0	0	0	0	0	0	0	0	0	0	0	0	0	0	0	0	0	0	0	0	0	0	0	0	0	0	0	0
mmu-mir-714_32_56_+	32	56	................................TGTCTGTGTGTGTTTGGGTCTTGC......................................................	24	TGTCTGTGTGTGTTTGGGTCTTGC	6	0.4497	0.00458878	0	0	0	0	0	0	0.2812	0	0	0	0	0	0	0	0	0	0	0	0	0	0	0	0	0	0	0	0	0	0	0	0	0	0	0	0	0	0	0	0	0	0
mmu-mir-714_32_59_+	32	59	................................TGTCTGTGTGTGTTTGGGTCTTGCGCT...................................................	27	TGTCTGTGTGTGTTTGGGTCTTGCGCT	6	0.6403	0.00653367	0	0	0	0.0539	0	0	0.2249	0	0	0	0	0	0	0	0	0	0	0	0	0	0	0	0	0	0	0	0	0	0.3615	0	0	0	0	0	0	0	0	0	0	0	0
mmu-mir-714_33_58_+	33	58	.................................GTCTGTGTGTGTTTGGGTCTTGCGC....................................................	25	GTCTGTGTGTGTTTGGGTCTTGCGC	6	0.3374	0.00344286	0	0	0	0	0	0	0.3374	0	0	0	0	0	0	0	0	0	0	0	0	0	0	0	0	0	0	0	0	0	0	0	0	0	0	0	0	0	0	0	0	0	0
mmu-mir-714_34_54_+	34	54	..................................TCTGTGTGTGTTTGGGTCTT........................................................	20	TCTGTGTGTGTTTGGGTCTT	6	0.5973	0.0060949	0	0.0494	0	0.1077	0	0	0	0	0	0	0	0	0	0	0	0	0	0	0	0	0	0	0	0	0	0	0	0	0	0	0	0	0	0	0	0	0	0	0	0	0
mmu-mir-714_36_61_+	36	61	....................................TGTGTGTGTTTGGGTCTTGCGCTGG.................................................	25	TGTGTGTGTTTGGGTCTTGCGCTGG	6	2.169	0.0221327	0	0	0	0	0	0	0	0	0	0	0	0	0	0	0	0	0	0	0	0	0	0	0	0	0	0	0	0	2.169	0	0	0	0	0	0	0	0	0	0	0	0
mmu-mir-714_44_72_+	44	72	............................................TTTGGGTCTTGCGCTGGGGGAGGCGGGG......................................	28	TTTGGGTCTTGCGCTGGGGGAGGCGGGG	6	0.3271	0.00333776	0.182	0	0	0	0	0	0	0.0469	0.0982	0	0	0	0	0	0	0	0	0	0	0	0	0	0	0	0	0	0	0	0	0	0	0	0	0	0	0	0	0	0	0	0
mmu-mir-714_46_67_+	46	67	..............................................TGGGTCTTGCGCTGGGGGAGG...........................................	21	TGGGTCTTGCGCTGGGGGAGG	6	1.7596	0.0179551	0	0	0	0	0	0	0	0	0	0	0	0	0	0	0	0	0	0	0	0	0	0	0	0	0	0	0	0	1.446	0	0	0	0	0	0	0	0	0	0	0	0
mmu-mir-714_51_73_+	51	73	...................................................CTTGCGCTGGGGGAGGCGGGGT.....................................	22	CTTGCGCTGGGGGAGGCGGGGT	6	0.3281	0.00334796	0	0	0	0	0.0469	0	0.2812	0	0	0	0	0	0	0	0	0	0	0	0	0	0	0	0	0	0	0	0	0	0	0	0	0	0	0	0	0	0	0	0	0	0
mmu-mir-714_51_77_+	51	77	...................................................CTTGCGCTGGGGGAGGCGGGGTCGAC.................................	26	CTTGCGCTGGGGGAGGCGGGGTCGAC	6	0.4331	0.00441939	0	0	0	0.2155	0	0	0	0	0.0491	0	0	0	0	0	0	0	0	0	0	0	0	0	0	0	0	0	0	0	0	0	0	0	0	0	0	0	0	0	0	0	0
mmu-mir-714_55_75_+	55	75	.......................................................CGCTGGGGGAGGCGGGGTCG...................................	20	CGCTGGGGGAGGCGGGGTCG	6	0.3691	0.00376633	0.0607	0	0.3084	0	0	0	0	0	0	0	0	0	0	0	0	0	0	0	0	0	0	0	0	0	0	0	0	0	0	0	0	0	0	0	0	0	0	0	0	0	0
mmu-mir-714_58_82_+	58	82	..........................................................TGGGGGAGGCGGGGTCGACCGCTC............................	24	TGGGGGAGGCGGGGTCGACCGCTC	6	0.7441	0.00759286	0	0.0988	0	0	0	0	0	0	0.0491	0	0	0	0	0	0	0	0	0	0	0	0	0	0	0	0	0	0	0	0	0	0	0	0	0	0	0	0	0	0	0	0
mmu-mir-714_58_85_+	58	85	..........................................................TGGGGGAGGCGGGGTCGACCGCTCGCG.........................	27	TGGGGGAGGCGGGGTCGACCGCTCGCG	6	0.3639	0.00371327	0.3639	0	0	0	0	0	0	0	0	0	0	0	0	0	0	0	0	0	0	0	0	0	0	0	0	0	0	0	0	0	0	0	0	0	0	0	0	0	0	0	0
mmu-mir-714_61_79_+	61	79	.............................................................GGGAGGCGGGGTCGACCG...............................	18	GGGAGGCGGGGTCGACCG	6	0.3187	0.00325204	0	0	0	0	0	0	0.2249	0.0938	0	0	0	0	0	0	0	0	0	0	0	0	0	0	0	0	0	0	0	0	0	0	0	0	0	0	0	0	0	0	0	0	0
mmu-mir-714_68_88_+	68	88	....................................................................GGGGTCGACCGCTCGCGGGG......................	20	GGGGTCGACCGCTCGCGGGG	6	1.287	0.0131327	0	0.0494	0	0	0	0	0	0	0.0491	0	0	0	0	0	0	0	0	0	0	0	0	0	0	0	0	0	0	0	1.0845	0	0	0	0	0	0	0	0	0	0	0	0
mmu-mir-714_69_89_+	69	89	.....................................................................GGGTCGACCGCTCGCGGGGT.....................	20	GGGTCGACCGCTCGCGGGGT	6	1.3999	0.0142847	0	0	0	0	0	0	0	0	0	0	0	0	0	0	0	0	0	0	0	0	0	0	0	0	0	0	0	0	0	0	0	0	0	0	0	0	0	0	0	0	0
mmu-mir-714_74_93_+	74	93	..........................................................................GACCGCTCGCGGGGTTGGC.................	19	GACCGCTCGCGGGGTTGGC	6	1.2123	0.0123704	0	0	0	0.0539	0	0	0	0	0	0	0	0	0	0	0	0	0	0	0	0	0	0	0	0	0	0	0	0	0	0	0	0	0	0	0	0	0	0	0	0	0
mmu-mir-714_76_94_+	76	94	............................................................................CCGCTCGCGGGGTTGGCG................	18	CCGCTCGCGGGGTTGGCG	6	0.7835	0.0079949	0	0	0	0	0	0	0	0	0	0	0	0	0	0	0	0	0	0	0	0	0	0	0	0	0	0	0	0	0	0	0	0	0	0	0	0	0	0	0	0	0
mmu-mir-714_81_100_+	81	100	.................................................................................CGCGGGGTTGGCGCGGTCG..........	19	CGCGGGGTTGGCGCGGTCG	6	1.029	0.0105	0.1213	0	0	0	0	0	0	0	0	0	0	0	0	0	0	0	0	0	0	0	0	0	0	0	0	0	0	0	0	0	0	0	0	0	0	0	0	0	0	0	0
mmu-mir-714_82_108_+	82	108	..................................................................................GCGGGGTTGGCGCGGTCGCCCGGCGC..	26	GCGGGGTTGGCGCGGTCGCCCGGCGC	6	0.325	0.00331633	0.1213	0	0	0.1077	0	0	0	0.0469	0.0491	0	0	0	0	0	0	0	0	0	0	0	0	0	0	0	0	0	0	0	0	0	0	0	0	0	0	0	0	0	0	0	0
mmu-mir-714_0_24_+	0	24	CGACGAGGGCCGGTCGGTCGCCCT......................................................................................	24	CGACGAGGGCCGGTCGGTCGCCCT	5	0.4959	0.0050602	0	0	0	0	0	0	0	0	0	0	0	0	0	0	0	0	0	0	0	0	0	0	0	0	0	0	0	0	0	0	0	0	0	0	0	0	0	0	0	0	0
mmu-mir-714_0_26_+	0	26	CGACGAGGGCCGGTCGGTCGCCCTGC....................................................................................	26	CGACGAGGGCCGGTCGGTCGCCCTGC	5	0.4842	0.00494082	0	0	0	0	0	0	0	0	0	0	0	0	0	0	0	0	0	0	0	0	0	0	0	0	0	0	0	0	0	0	0	0	0	0	0	0	0	0	0	0	0
mmu-mir-714_3_27_+	3	27	...CGAGGGCCGGTCGGTCGCCCTGCG...................................................................................	24	CGAGGGCCGGTCGGTCGCCCTGCG	5	1.4876	0.0151796	0	0	0	0	0	0	0	0	0	0	0	0	0	0	0	0	0	0	0	0	0	0	0	0	0	0	0	0	0	0	0	0	0	0	0	0	0	0	0	0	0
mmu-mir-714_7_25_+	7	25	.......GGCCGGTCGGTCGCCCTG.....................................................................................	18	GGCCGGTCGGTCGCCCTG	5	0.242	0.00246939	0	0.1482	0	0	0	0	0	0.0938	0	0	0	0	0	0	0	0	0	0	0	0	0	0	0	0	0	0	0	0	0	0	0	0	0	0	0	0	0	0	0	0	0
mmu-mir-714_7_26_+	7	26	.......GGCCGGTCGGTCGCCCTGC....................................................................................	19	GGCCGGTCGGTCGCCCTGC	5	0.6536	0.00666939	0.182	0	0	0	0	0	0	0.0469	0	0	0	0	0	0	0	0	0	0	0	0	0	0	0	0	0	0	0	0	0	0	0	0	0	0	0	0	0	0	0	0	0
mmu-mir-714_8_37_+	8	37	........GCCGGTCGGTCGCCCTGCGGTGGTTGTCT.........................................................................	29	GCCGGTCGGTCGCCCTGCGGTGGTTGTCT	5	0.2565	0.00261735	0	0.0988	0.0617	0	0	0	0	0.0469	0.0491	0	0	0	0	0	0	0	0	0	0	0	0	0	0	0	0	0	0	0	0	0	0	0	0	0	0	0	0	0	0	0	0
mmu-mir-714_11_30_+	11	30	...........GGTCGGTCGCCCTGCGGTG................................................................................	19	GGTCGGTCGCCCTGCGGTG	5	0.4451	0.00454184	0	0	0	0	0	0	0.0562	0	0.0982	0	0	0	0	0	0	0	0	0	0	0	0	0	0	0	0	0	0	0	0	0	0	0	0	0	0	0	0	0	0	0	0
mmu-mir-714_12_32_+	12	32	............GTCGGTCGCCCTGCGGTGGT..............................................................................	20	GTCGGTCGCCCTGCGGTGGT	5	0.5744	0.00586122	0	0	0	0	0	0	0	0.0938	0	0	0	0	0	0	0	0	0	0	0	0	0	0	0	0	0	0	0	0	0	0	0	0	0	0	0	0	0	0	0	0	0
mmu-mir-714_13_32_+	13	32	.............TCGGTCGCCCTGCGGTGGT..............................................................................	19	TCGGTCGCCCTGCGGTGGT	5	0.798	0.00814286	0	0	0	0	0	0	0	0	0	0	0	0	0	0	0	0	0	0	0	0	0	0	0	0	0	0	0	0	0	0	0	0	0	0	0	0	0	0	0	0	0
mmu-mir-714_15_36_+	15	36	...............GGTCGCCCTGCGGTGGTTGTC..........................................................................	21	GGTCGCCCTGCGGTGGTTGTC	5	0.8034	0.00819796	0	0	0	0	0	0	0	0.0469	0	0	0	0	0	0	0	0	0	0	0	0	0	0	0	0	0	0	0	0	0.3615	0	0	0	0	0	0	0	0	0	0	0	0
mmu-mir-714_17_40_+	17	40	.................TCGCCCTGCGGTGGTTGTCTGTG......................................................................	23	TCGCCCTGCGGTGGTTGTCTGTG	5	0.9773	0.00997245	0	0	0	0	0	0	0	0	0	0	0	0	0	0	0	0	0	0	0	0	0	0	0	0	0	0	0	0	0	0	0	0	0	0	0	0	0	0	0	0	0
mmu-mir-714_25_47_+	25	47	.........................CGGTGGTTGTCTGTGTGTGTTT...............................................................	22	CGGTGGTTGTCTGTGTGTGTTT	5	0.8636	0.00881224	0	0	0	0	0	0	0	0.1406	0	0	0	0	0	0	0	0	0	0	0	0	0	0	0	0	0	0	0	0	0.723	0	0	0	0	0	0	0	0	0	0	0	0
mmu-mir-714_29_51_+	29	51	.............................GGTTGTCTGTGTGTGTTTGGGT...........................................................	22	GGTTGTCTGTGTGTGTTTGGGT	5	0.7104	0.00724898	0	0.0988	0	0	0	0	0	0	0	0	0	0	0	0	0	0	0	0	0	0	0	0	0	0	0	0	0	0	0.3615	0	0	0	0	0	0	0	0	0	0	0	0
mmu-mir-714_30_48_+	30	48	..............................GTTGTCTGTGTGTGTTTG..............................................................	18	GTTGTCTGTGTGTGTTTG	5	1.0576	0.0107918	0	0	0	0	0	0	0	0.0469	0	0	0	0	0	0	0	0	0	0	0	0	0	0	0	0	0	0	0	0	0.723	0	0	0	0	0	0	0	0	0	0	0	0
mmu-mir-714_30_58_+	30	58	..............................GTTGTCTGTGTGTGTTTGGGTCTTGCGC....................................................	28	GTTGTCTGTGTGTGTTTGGGTCTTGCGC	5	0.8295	0.00846429	0	0	0	0	0	0	0	0	0	0	0	0	0	0	0	0	0	0	0	0	0	0	0	0	0	0	0	0	0	0	0	0	0	0	0	0	0	0	0	0	0
mmu-mir-714_37_55_+	37	55	.....................................GTGTGTGTTTGGGTCTTG.......................................................	18	GTGTGTGTTTGGGTCTTG	5	0.8039	0.00820306	0	0	0	0	0	0	0	0.0469	0.0491	0	0	0	0	0	0	0	0	0	0	0	0	0	0	0	0	0	0	0	0.3615	0	0	0	0	0	0	0	0	0	0	0	0
mmu-mir-714_37_56_+	37	56	.....................................GTGTGTGTTTGGGTCTTGC......................................................	19	GTGTGTGTTTGGGTCTTGC	5	0.7483	0.00763571	0	0	0	0.0539	0	0	0	0	0	0	0	0	0	0	0	0	0	0	0	0	0	0	0	0	0	0	0	0	0.3615	0	0	0	0	0	0	0	0	0	0	0	0
mmu-mir-714_38_58_+	38	58	......................................TGTGTGTTTGGGTCTTGCGC....................................................	20	TGTGTGTTTGGGTCTTGCGC	5	0.8095	0.0082602	0	0	0	0	0	0	0	0	0	0	0	0	0	0	0	0	0	0	0	0	0	0	0	0	0	0	0	0	0.3615	0	0	0	0	0	0	0	0	0	0	0	0
mmu-mir-714_39_59_+	39	59	.......................................GTGTGTTTGGGTCTTGCGCT...................................................	20	GTGTGTTTGGGTCTTGCGCT	5	0.7417	0.00756837	0	0	0	0	0	0	0	0	0	0	0	0	0	0	0	0	0	0	0	0	0	0	0	0	0	0	0	0	0.3615	0	0	0	0	0	0	0	0	0	0	0	0
mmu-mir-714_40_68_+	40	68	........................................TGTGTTTGGGTCTTGCGCTGGGGGAGGC..........................................	28	TGTGTTTGGGTCTTGCGCTGGGGGAGGC	5	0.432	0.00440816	0.2426	0	0	0	0	0	0	0	0	0	0	0	0	0	0	0	0	0	0	0	0	0	0	0	0	0	0	0	0	0	0	0	0	0.1894	0	0	0	0	0	0	0
mmu-mir-714_42_63_+	42	63	..........................................TGTTTGGGTCTTGCGCTGGGG...............................................	21	TGTTTGGGTCTTGCGCTGGGG	5	0.5771	0.00588878	0	0	0	0	0.0469	0	0.1687	0	0	0	0	0	0	0	0	0	0	0	0	0	0	0	0	0	0	0	0	0	0.3615	0	0	0	0	0	0	0	0	0	0	0	0
mmu-mir-714_44_64_+	44	64	............................................TTTGGGTCTTGCGCTGGGGG..............................................	20	TTTGGGTCTTGCGCTGGGGG	5	0.4666	0.00476122	0	0	0	0	0	0	0.0562	0.0938	0	0	0	0	0	0	0	0	0	0	0	0	0	0	0	0	0	0	0	0	0	0	0	0	0	0	0	0	0	0	0	0	0
mmu-mir-714_45_75_+	45	75	.............................................TTGGGTCTTGCGCTGGGGGAGGCGGGGTCG...................................	30	TTGGGTCTTGCGCTGGGGGAGGCGGGGTCG	5	0.3033	0.0030949	0.3033	0	0	0	0	0	0	0	0	0	0	0	0	0	0	0	0	0	0	0	0	0	0	0	0	0	0	0	0	0	0	0	0	0	0	0	0	0	0	0	0
mmu-mir-714_46_69_+	46	69	..............................................TGGGTCTTGCGCTGGGGGAGGCG.........................................	23	TGGGTCTTGCGCTGGGGGAGGCG	5	1.0356	0.0105673	0	0	0	0	0	0	0	0	0	0	0	0	0	0	0	0	0	0	0	0	0	0	0	0	0	0	0	0	0.723	0	0	0	0	0	0	0	0	0	0	0	0
mmu-mir-714_48_70_+	48	70	................................................GGTCTTGCGCTGGGGGAGGCGG........................................	22	GGTCTTGCGCTGGGGGAGGCGG	5	0.9005	0.00918878	0	0	0	0	0	0	0	0	0	0	0	0	0	0	0	0	0	0	0	0	0	0	0	0	0	0	0	0	0.3615	0	0	0	0	0	0	0	0	0	0	0	0
mmu-mir-714_48_77_+	48	77	................................................GGTCTTGCGCTGGGGGAGGCGGGGTCGAC.................................	29	GGTCTTGCGCTGGGGGAGGCGGGGTCGAC	5	1.3142	0.0134102	0	0	0	0	0	0.0612	0	0	0	0	0	0	0	0	0	0	0	0	0	0	0	0	0	0	0	0	0	0	1.0845	0	0	0	0	0	0	0	0	0	0	0	0
mmu-mir-714_49_71_+	49	71	.................................................GTCTTGCGCTGGGGGAGGCGGG.......................................	22	GTCTTGCGCTGGGGGAGGCGGG	5	0.8169	0.00833571	0	0.0494	0	0	0	0	0	0	0	0	0	0	0	0	0	0	0	0	0	0	0	0	0	0	0	0	0	0	0.3615	0	0	0	0	0	0	0	0	0	0	0	0
mmu-mir-714_50_71_+	50	71	..................................................TCTTGCGCTGGGGGAGGCGGG.......................................	21	TCTTGCGCTGGGGGAGGCGGG	5	0.5384	0.00549388	0	0	0	0	0	0	0	0	0	0	0	0	0	0	0	0	0	0	0	0	0	0	0	0	0	0	0	0	0	0	0	0	0	0	0	0	0	0	0	0	0
mmu-mir-714_51_75_+	51	75	...................................................CTTGCGCTGGGGGAGGCGGGGTCG...................................	24	CTTGCGCTGGGGGAGGCGGGGTCG	5	0.256	0.00261224	0	0.0988	0	0	0	0.0612	0	0.0469	0.0491	0	0	0	0	0	0	0	0	0	0	0	0	0	0	0	0	0	0	0	0	0	0	0	0	0	0	0	0	0	0	0	0
mmu-mir-714_54_76_+	54	76	......................................................GCGCTGGGGGAGGCGGGGTCGA..................................	22	GCGCTGGGGGAGGCGGGGTCGA	5	1.5586	0.0159041	0	0	0	0	0	0	0	0	0	0	0	0	0	0	0	0	0	0	0	0	0	0	0	0	0	0	0	0	1.446	0	0	0	0	0	0	0	0	0	0	0	0
mmu-mir-714_55_74_+	55	74	.......................................................CGCTGGGGGAGGCGGGGTC....................................	19	CGCTGGGGGAGGCGGGGTC	5	0.6468	0.0066	0.1213	0	0	0.0539	0	0	0	0.0469	0	0	0	0	0	0	0	0	0	0	0	0	0	0	0	0	0	0	0	0	0	0	0	0	0	0	0	0	0	0	0	0	0
mmu-mir-714_55_77_+	55	77	.......................................................CGCTGGGGGAGGCGGGGTCGAC.................................	22	CGCTGGGGGAGGCGGGGTCGAC	5	1.2415	0.0126684	0	0	0	0	0	0	0	0.0938	0	0	0	0	0	0	0	0	0	0	0	0	0	0	0	0	0	0	0	0	0.723	0	0	0	0	0	0	0	0	0	0	0	0
mmu-mir-714_60_80_+	60	80	............................................................GGGGAGGCGGGGTCGACCGC..............................	20	GGGGAGGCGGGGTCGACCGC	5	0.4273	0.0043602	0	0	0	0	0	0	0	0	0.1472	0	0	0	0	0	0	0	0	0	0	0	0	0	0	0	0	0	0	0	0	0	0	0	0	0	0	0	0	0	0	0	0
mmu-mir-714_63_93_+	63	93	...............................................................GAGGCGGGGTCGACCGCTCGCGGGGTTGGC.................	30	GAGGCGGGGTCGACCGCTCGCGGGGTTGGC	5	0.2464	0.00251429	0	0.1482	0	0	0	0	0	0	0.0982	0	0	0	0	0	0	0	0	0	0	0	0	0	0	0	0	0	0	0	0	0	0	0	0	0	0	0	0	0	0	0	0
mmu-mir-714_64_84_+	64	84	................................................................AGGCGGGGTCGACCGCTCGC..........................	20	AGGCGGGGTCGACCGCTCGC	5	0.886	0.00904082	0	0	0	0	0	0	0	0	0	0	0	0	0	0	0	0	0	0	0	0	0	0	0	0	0	0	0	0	0	0	0	0	0	0	0	0	0	0	0	0	0
mmu-mir-714_64_87_+	64	87	................................................................AGGCGGGGTCGACCGCTCGCGGG.......................	23	AGGCGGGGTCGACCGCTCGCGGG	5	0.3345	0.00341327	0.2426	0	0	0	0	0	0	0	0	0	0	0	0	0	0	0	0	0	0	0	0	0	0	0	0	0	0	0	0	0	0	0	0	0	0	0	0	0	0	0	0
mmu-mir-714_67_85_+	67	85	...................................................................CGGGGTCGACCGCTCGCG.........................	18	CGGGGTCGACCGCTCGCG	5	0.4756	0.00485306	0	0	0	0	0.1407	0	0	0	0	0	0	0	0	0	0	0	0	0	0	0	0	0	0	0	0	0	0	0	0	0	0	0	0	0	0	0	0	0	0	0	0
mmu-mir-714_67_97_+	67	97	...................................................................CGGGGTCGACCGCTCGCGGGGTTGGCGCGG.............	30	CGGGGTCGACCGCTCGCGGGGTTGGCGCGG	5	0.2832	0.0028898	0	0	0.185	0	0	0	0	0	0.0982	0	0	0	0	0	0	0	0	0	0	0	0	0	0	0	0	0	0	0	0	0	0	0	0	0	0	0	0	0	0	0	0
mmu-mir-714_68_89_+	68	89	....................................................................GGGGTCGACCGCTCGCGGGGT.....................	21	GGGGTCGACCGCTCGCGGGGT	5	0.2812	0.00286939	0	0	0	0	0	0	0.2812	0	0	0	0	0	0	0	0	0	0	0	0	0	0	0	0	0	0	0	0	0	0	0	0	0	0	0	0	0	0	0	0	0	0
mmu-mir-714_68_97_+	68	97	....................................................................GGGGTCGACCGCTCGCGGGGTTGGCGCGG.............	29	GGGGTCGACCGCTCGCGGGGTTGGCGCGG	5	0.4327	0.00441531	0	0.0494	0.185	0	0	0	0	0	0	0	0	0	0	0	0	0	0	0	0	0	0	0	0	0	0	0	0	0	0	0	0	0	0	0	0	0	0	0	0	0	0
mmu-mir-714_71_89_+	71	89	.......................................................................GTCGACCGCTCGCGGGGT.....................	18	GTCGACCGCTCGCGGGGT	5	0.3033	0.0030949	0.3033	0	0	0	0	0	0	0	0	0	0	0	0	0	0	0	0	0	0	0	0	0	0	0	0	0	0	0	0	0	0	0	0	0	0	0	0	0	0	0	0
mmu-mir-714_71_91_+	71	91	.......................................................................GTCGACCGCTCGCGGGGTTG...................	20	GTCGACCGCTCGCGGGGTTG	5	1.3106	0.0133735	0	0	0	0	0	0	0	0	0	0	0	0	0	0	0	0	0	0	0	0	0	0	0	0	0	0	0	0	1.0845	0	0	0	0	0	0	0	0	0	0	0	0
mmu-mir-714_73_98_+	73	98	.........................................................................CGACCGCTCGCGGGGTTGGCGCGGT............	25	CGACCGCTCGCGGGGTTGGCGCGGT	5	0.2856	0.00291429	0.0607	0	0	0	0	0	0.2249	0	0	0	0	0	0	0	0	0	0	0	0	0	0	0	0	0	0	0	0	0	0	0	0	0	0	0	0	0	0	0	0	0	0
mmu-mir-714_75_100_+	75	100	...........................................................................ACCGCTCGCGGGGTTGGCGCGGTCG..........	25	ACCGCTCGCGGGGTTGGCGCGGTCG	5	0.3043	0.0031051	0.2426	0	0.0617	0	0	0	0	0	0	0	0	0	0	0	0	0	0	0	0	0	0	0	0	0	0	0	0	0	0	0	0	0	0	0	0	0	0	0	0	0	0
mmu-mir-714_78_105_+	78	105	..............................................................................GCTCGCGGGGTTGGCGCGGTCGCCCGG.....	27	GCTCGCGGGGTTGGCGCGGTCGCCCGG	5	0.2788	0.0028449	0	0	0.185	0	0	0	0	0.0938	0	0	0	0	0	0	0	0	0	0	0	0	0	0	0	0	0	0	0	0	0	0	0	0	0	0	0	0	0	0	0	0	0
mmu-mir-714_79_102_+	79	102	...............................................................................CTCGCGGGGTTGGCGCGGTCGCC........	23	CTCGCGGGGTTGGCGCGGTCGCC	5	0.2958	0.00301837	0	0	0	0.1077	0.0469	0.0612	0	0	0	0	0	0	0	0	0	0	0	0	0	0	0	0	0	0	0	0	0	0	0	0	0	0	0	0	0	0	0	0	0	0	0
mmu-mir-714_79_107_+	79	107	...............................................................................CTCGCGGGGTTGGCGCGGTCGCCCGGCG...	28	CTCGCGGGGTTGGCGCGGTCGCCCGGCG	5	0.2602	0.0026551	0	0	0	0.0539	0	0	0.1125	0.0938	0	0	0	0	0	0	0	0	0	0	0	0	0	0	0	0	0	0	0	0	0	0	0	0	0	0	0	0	0	0	0	0	0
mmu-mir-714_81_107_+	81	107	.................................................................................CGCGGGGTTGGCGCGGTCGCCCGGCG...	26	CGCGGGGTTGGCGCGGTCGCCCGGCG	5	0.2417	0.00246633	0	0.0988	0	0	0	0	0	0.0938	0.0491	0	0	0	0	0	0	0	0	0	0	0	0	0	0	0	0	0	0	0	0	0	0	0	0	0	0	0	0	0	0	0	0
mmu-mir-714_84_102_+	84	102	....................................................................................GGGGTTGGCGCGGTCGCC........	18	GGGGTTGGCGCGGTCGCC	5	0.5803	0.00592143	0	0	0	0	0	0	0	0	0.0982	0	0	0	0	0	0	0	0	0	0	0	0	0	0	0	0	0	0	0	0	0	0	0	0	0	0	0	0	0	0	0	0
mmu-mir-714_84_106_+	84	106	....................................................................................GGGGTTGGCGCGGTCGCCCGGC....	22	GGGGTTGGCGCGGTCGCCCGGC	5	0.2344	0.00239184	0	0	0	0	0	0	0	0.2344	0	0	0	0	0	0	0	0	0	0	0	0	0	0	0	0	0	0	0	0	0	0	0	0	0	0	0	0	0	0	0	0	0
mmu-mir-714_90_110_+	90	110	..........................................................................................GGCGCGGTCGCCCGGCGCCG	20	GGCGCGGTCGCCCGGCGCCG	5	0.5544	0.00565714	0	0	0	0	0	0	0	0.0938	0	0	0	0	0	0	0	0	0	0	0	0	0	0	0	0	0	0	0	0	0	0	0	0	0	0	0	0	0	0	0	0	0
mmu-mir-714_91_109_+	91	109	...........................................................................................GCGCGGTCGCCCGGCGCC.	18	GCGCGGTCGCCCGGCGCC	5	0.2454	0.00250408	0	0	0	0	0	0	0	0	0.2454	0	0	0	0	0	0	0	0	0	0	0	0	0	0	0	0	0	0	0	0	0	0	0	0	0	0	0	0	0	0	0	0
mmu-mir-714_1_28_+	1	28	.GACGAGGGCCGGTCGGTCGCCCTGCGG..................................................................................	27	GACGAGGGCCGGTCGGTCGCCCTGCGG	4	0.4272	0.00435918	0	0.0494	0	0	0	0	0	0.0469	0	0	0	0	0	0	0	0	0	0	0	0	0	0	0	0	0	0	0	0	0	0	0	0	0	0	0	0	0	0	0	0	0
mmu-mir-714_3_28_+	3	28	...CGAGGGCCGGTCGGTCGCCCTGCGG..................................................................................	25	CGAGGGCCGGTCGGTCGCCCTGCGG	4	0.4804	0.00490204	0	0	0	0	0	0	0	0	0	0	0	0	0	0	0	0	0	0	0	0	0	0	0	0	0	0	0	0	0	0	0	0	0	0	0	0	0	0	0	0	0
mmu-mir-714_5_25_+	5	25	.....AGGGCCGGTCGGTCGCCCTG.....................................................................................	20	AGGGCCGGTCGGTCGCCCTG	4	1.3278	0.013549	0	0	0	0.0539	0	0	0	0	0	0	0	0	0	0	0	0	0	0	0	0	0	0	0	0	0	0	0	0	0	0	0	0	0	0	0	0	0	0	0	0	0
mmu-mir-714_5_33_+	5	33	.....AGGGCCGGTCGGTCGCCCTGCGGTGGTT.............................................................................	28	AGGGCCGGTCGGTCGCCCTGCGGTGGTT	4	2.3056	0.0235265	0	0	0	0	0	0	0	0.0938	0	0	0	0	0	0	0	0	0	0	0	0	0	0	0	0	0	0	0	0	0	0	0	0	0	0	0	0	0	0	0	0	0
mmu-mir-714_8_27_+	8	27	........GCCGGTCGGTCGCCCTGCG...................................................................................	19	GCCGGTCGGTCGCCCTGCG	4	0.88	0.00897959	0	0	0	0	0	0	0	0.0938	0	0	0	0	0	0	0	0	0	0	0	0	0	0	0	0	0	0	0	0	0.3615	0	0	0	0	0	0	0	0	0	0	0	0
mmu-mir-714_8_31_+	8	31	........GCCGGTCGGTCGCCCTGCGGTGG...............................................................................	23	GCCGGTCGGTCGCCCTGCGGTGG	4	0.3281	0.00334796	0.182	0	0	0	0	0	0	0	0	0	0	0	0	0	0	0	0	0	0	0	0	0	0	0	0	0	0	0	0	0	0	0	0	0	0	0	0	0	0	0	0
mmu-mir-714_9_28_+	9	28	.........CCGGTCGGTCGCCCTGCGG..................................................................................	19	CCGGTCGGTCGCCCTGCGG	4	0.6077	0.00620102	0	0	0	0	0	0	0	0	0	0	0	0	0	0	0	0	0	0	0	0	0	0	0	0	0	0	0	0	0	0	0	0	0	0	0	0	0	0	0	0	0
mmu-mir-714_9_30_+	9	30	.........CCGGTCGGTCGCCCTGCGGTG................................................................................	21	CCGGTCGGTCGCCCTGCGGTG	4	0.3142	0.00320612	0	0.0988	0	0	0.0469	0	0	0	0	0	0	0	0	0	0	0	0	0	0	0	0	0	0	0	0	0	0	0	0	0	0	0	0	0	0	0	0	0	0	0	0
mmu-mir-714_10_30_+	10	30	..........CGGTCGGTCGCCCTGCGGTG................................................................................	20	CGGTCGGTCGCCCTGCGGTG	4	0.5823	0.00594184	0	0	0	0	0	0	0	0	0	0	0	0	0	0	0	0	0	0	0	0	0	0	0	0	0	0	0	0	0	0	0	0	0	0	0	0	0	0	0	0	0
mmu-mir-714_10_40_+	10	40	..........CGGTCGGTCGCCCTGCGGTGGTTGTCTGTG......................................................................	30	CGGTCGGTCGCCCTGCGGTGGTTGTCTGTG	4	0.4258	0.0043449	0	0	0	0	0	0	0	0	0.0491	0	0	0	0	0	0	0	0	0	0	0	0	0	0	0	0	0	0	0	0	0	0	0	0	0	0	0	0	0	0	0	0
mmu-mir-714_11_36_+	11	36	...........GGTCGGTCGCCCTGCGGTGGTTGTC..........................................................................	25	GGTCGGTCGCCCTGCGGTGGTTGTC	4	0.2311	0.00235816	0.182	0	0	0	0	0	0	0	0.0491	0	0	0	0	0	0	0	0	0	0	0	0	0	0	0	0	0	0	0	0	0	0	0	0	0	0	0	0	0	0	0	0
mmu-mir-714_16_38_+	16	38	................GTCGCCCTGCGGTGGTTGTCTG........................................................................	22	GTCGCCCTGCGGTGGTTGTCTG	4	0.5361	0.00547041	0	0	0	0	0	0	0	0	0	0	0	0	0	0	0	0	0	0	0	0	0	0	0	0	0	0	0	0	0	0	0	0	0	0	0	0	0	0	0	0	0
mmu-mir-714_19_41_+	19	41	...................GCCCTGCGGTGGTTGTCTGTGT.....................................................................	22	GCCCTGCGGTGGTTGTCTGTGT	4	0.6941	0.00708265	0.1213	0	0	0	0	0	0	0	0	0	0	0	0	0	0	0	0	0	0	0	0	0	0	0	0	0	0	0	0	0	0	0	0	0	0	0	0	0	0	0	0
mmu-mir-714_22_44_+	22	44	......................CTGCGGTGGTTGTCTGTGTGTG..................................................................	22	CTGCGGTGGTTGTCTGTGTGTG	4	0.8895	0.00907653	0	0	0	0.0539	0	0	0	0	0	0	0	0	0	0	0	0	0	0	0	0	0	0	0	0	0	0	0	0	0.723	0	0	0	0	0	0	0	0	0	0	0	0
mmu-mir-714_24_51_+	24	51	........................GCGGTGGTTGTCTGTGTGTGTTTGGGT...........................................................	27	GCGGTGGTTGTCTGTGTGTGTTTGGGT	4	1.1407	0.0116398	0	0	0	0	0	0	0.0562	0	0	0	0	0	0	0	0	0	0	0	0	0	0	0	0	0	0	0	0	0	1.0845	0	0	0	0	0	0	0	0	0	0	0	0
mmu-mir-714_29_48_+	29	48	.............................GGTTGTCTGTGTGTGTTTG..............................................................	19	GGTTGTCTGTGTGTGTTTG	4	1.253	0.0127857	0	0	0	0	0	0	0	0	0	0	0	0	0	0	0	0	0	0	0	0	0	0	0	0	0	0	0	0	1.0845	0	0	0	0	0	0	0	0	0	0	0	0
mmu-mir-714_33_55_+	33	55	.................................GTCTGTGTGTGTTTGGGTCTTG.......................................................	22	GTCTGTGTGTGTTTGGGTCTTG	4	0.2044	0.00208571	0	0.1482	0	0	0	0	0.0562	0	0	0	0	0	0	0	0	0	0	0	0	0	0	0	0	0	0	0	0	0	0	0	0	0	0	0	0	0	0	0	0	0	0
mmu-mir-714_33_63_+	33	63	.................................GTCTGTGTGTGTTTGGGTCTTGCGCTGGGG...............................................	30	GTCTGTGTGTGTTTGGGTCTTGCGCTGGGG	4	0.3311	0.00337857	0	0	0.185	0	0	0	0	0	0	0	0	0	0	0	0	0	0	0	0	0	0	0	0	0	0	0	0	0	0	0	0	0	0	0	0	0	0	0	0	0	0
mmu-mir-714_34_56_+	34	56	..................................TCTGTGTGTGTTTGGGTCTTGC......................................................	22	TCTGTGTGTGTTTGGGTCTTGC	4	0.4046	0.00412857	0	0	0	0	0	0	0.1125	0	0	0	0	0	0	0	0	0	0	0	0	0	0	0	0	0	0	0	0	0	0	0	0	0	0	0	0	0	0	0	0	0	0
mmu-mir-714_35_55_+	35	55	...................................CTGTGTGTGTTTGGGTCTTG.......................................................	20	CTGTGTGTGTTTGGGTCTTG	4	0.3465	0.00353571	0	0.1482	0	0	0	0	0	0	0	0	0	0	0	0	0	0	0	0	0	0	0	0	0	0	0	0	0	0	0	0	0	0	0	0	0	0	0	0	0	0	0
mmu-mir-714_35_56_+	35	56	...................................CTGTGTGTGTTTGGGTCTTGC......................................................	21	CTGTGTGTGTTTGGGTCTTGC	4	0.4885	0.00498469	0	0	0	0	0	0	0	0	0	0	0	0	0	0	0	0	0	0	0	0	0	0	0	0	0	0	0	0	0	0	0	0	0	0	0	0	0	0	0	0	0
mmu-mir-714_35_57_+	35	57	...................................CTGTGTGTGTTTGGGTCTTGCG.....................................................	22	CTGTGTGTGTTTGGGTCTTGCG	4	0.5442	0.00555306	0	0	0	0	0	0	0	0	0	0	0	0	0	0	0	0	0	0	0	0	0	0	0	0	0	0	0	0	0	0	0	0	0	0	0	0	0	0	0	0	0
mmu-mir-714_36_54_+	36	54	....................................TGTGTGTGTTTGGGTCTT........................................................	18	TGTGTGTGTTTGGGTCTT	4	0.7129	0.00727449	0	0	0	0	0	0	0	0	0.0491	0	0	0	0	0	0	0	0	0	0	0	0	0	0	0	0	0	0	0	0.3615	0	0	0	0	0	0	0	0	0	0	0	0
mmu-mir-714_36_65_+	36	65	....................................TGTGTGTGTTTGGGTCTTGCGCTGGGGGA.............................................	29	TGTGTGTGTTTGGGTCTTGCGCTGGGGGA	4	0.3279	0.00334592	0	0	0	0	0	0	0.1125	0.0469	0	0	0	0	0	0	0	0	0	0	0	0	0	0	0	0	0	0	0	0	0	0	0	0	0	0	0	0	0	0	0	0	0
mmu-mir-714_37_61_+	37	61	.....................................GTGTGTGTTTGGGTCTTGCGCTGG.................................................	24	GTGTGTGTTTGGGTCTTGCGCTGG	4	1.5615	0.0159337	0	0	0	0	0	0	0	0	0	0	0	0	0	0	0	0	0	0	0	0	0	0	0	0	0	0	0	0	0	0	0	0	0	0	0	0	0	0	0	0	0
mmu-mir-714_38_56_+	38	56	......................................TGTGTGTTTGGGTCTTGC......................................................	18	TGTGTGTTTGGGTCTTGC	4	0.5416	0.00552653	0	0	0	0	0	0	0	0	0.0491	0	0	0	0	0	0	0	0	0	0	0	0	0	0	0	0	0	0	0	0	0	0	0	0	0	0	0	0	0	0	0	0
mmu-mir-714_38_59_+	38	59	......................................TGTGTGTTTGGGTCTTGCGCT...................................................	21	TGTGTGTTTGGGTCTTGCGCT	4	0.5097	0.00520102	0	0.1482	0	0	0	0	0	0	0	0	0	0	0	0	0	0	0	0	0	0	0	0	0	0	0	0	0	0	0.3615	0	0	0	0	0	0	0	0	0	0	0	0
mmu-mir-714_38_62_+	38	62	......................................TGTGTGTTTGGGTCTTGCGCTGGG................................................	24	TGTGTGTTTGGGTCTTGCGCTGGG	4	0.5893	0.00601327	0	0	0	0	0	0	0	0	0	0	0	0	0	0	0	0	0	0	0	0	0	0	0	0	0	0	0	0	0	0	0	0	0	0	0	0	0	0	0	0	0
mmu-mir-714_41_59_+	41	59	.........................................GTGTTTGGGTCTTGCGCT...................................................	18	GTGTTTGGGTCTTGCGCT	4	0.3883	0.00396224	0	0	0	0	0	0	0	0	0	0	0	0	0	0	0	0	0	0	0	0	0	0	0	0	0	0	0	0	0	0	0	0	0	0	0	0	0	0	0	0	0
mmu-mir-714_42_60_+	42	60	..........................................TGTTTGGGTCTTGCGCTG..................................................	18	TGTTTGGGTCTTGCGCTG	4	0.8744	0.00892245	0	0	0	0	0	0	0	0	0	0	0	0	0	0	0	0	0	0	0	0	0	0	0	0	0	0	0	0	0.3615	0	0	0	0	0	0	0	0	0	0	0	0
mmu-mir-714_42_67_+	42	67	..........................................TGTTTGGGTCTTGCGCTGGGGGAGG...........................................	25	TGTTTGGGTCTTGCGCTGGGGGAGG	4	0.983	0.0100306	0	0	0.0617	0	0	0	0	0	0	0	0	0	0	0	0	0	0	0	0	0	0	0	0	0	0	0	0	0	0.723	0	0	0	0	0	0	0	0	0	0	0	0
mmu-mir-714_43_66_+	43	66	...........................................GTTTGGGTCTTGCGCTGGGGGAG............................................	23	GTTTGGGTCTTGCGCTGGGGGAG	4	0.3301	0.00336837	0.182	0	0	0	0	0	0	0	0	0	0	0	0	0	0	0	0	0	0	0	0	0	0	0	0	0	0	0	0	0	0	0	0	0	0	0	0	0	0	0	0
mmu-mir-714_44_62_+	44	62	............................................TTTGGGTCTTGCGCTGGG................................................	18	TTTGGGTCTTGCGCTGGG	4	0.7113	0.00725816	0	0	0	0	0	0	0	0	0	0	0	0	0	0	0	0	0	0	0	0	0	0	0	0	0	0	0	0	0	0	0	0	0	0	0	0	0	0	0	0	0
mmu-mir-714_45_68_+	45	68	.............................................TTGGGTCTTGCGCTGGGGGAGGC..........................................	23	TTGGGTCTTGCGCTGGGGGAGGC	4	0.2382	0.00243061	0.182	0	0	0	0	0	0.0562	0	0	0	0	0	0	0	0	0	0	0	0	0	0	0	0	0	0	0	0	0	0	0	0	0	0	0	0	0	0	0	0	0	0
[truncated: 385 more rows]
[truncated: 57 more columns]

## Sheet: mmu-mir-715
key	start0based	stop1based	mmu-mir-715	sequencelength	sequence	sumcount	sumnormRPMmirpre	Average (RPM normalized by miRNA mapping reads)	SRR640602.GSM1057530: ES_NI; Mus musculus; RNA-Seq	SRR640603.GSM1057531: ES_EMCV 3hrs; Mus musculus; RNA-Seq	SRR640604.GSM1057532: ES_EMCV 6hrs; Mus musculus; RNA-Seq	SRR640605.GSM1057533: ES_D0 INF; Mus musculus; RNA-Seq	SRR640606.GSM1057534: ES_D10 NI; Mus musculus; RNA-Seq	SRR640607.GSM1057535: ES_D10 INF; Mus musculus; RNA-Seq	SRR640612.GSM1057540: IP_mAGO2_INF; Mus musculus; RNA-Seq	SRR640614.GSM1057542: ES_NoV; Mus musculus; RNA-Seq	SRR640615.GSM1057543: ES_NoVÃ«Ã“B2; Mus musculus; RNA-Seq	SRR037904.GSM510440: brain_rep1	SRR037905.GSM510441: brain_rep2	SRR037906.GSM510442: brain_rep3	SRR037907.GSM510443: brain_rep4	SRR037919.GSM510457: e12p5_rep1	SRR037920.GSM510458: e12p5_rep2	SRR037921.GSM510459: e12p5_rep3	SRR037922.GSM510460: e12p5_rep4	SRR037923.GSM510461: e9p5_rep1	SRR037924.GSM510462: e9p5_rep2	SRR037925.GSM510463: e9p5_rep3	SRR037926.GSM510464: e9p5_rep4	SRR037927.GSM510465: e7p5_rep1	SRR037928.GSM510466: e7p5_rep2	SRR037929.GSM510467: e7p5_rep3	SRR037930.GSM510468: e7p5_rep4	SRR038741.GSM527276: DGCR8_wt_hippocampus	SRR038744.GSM527279: DGCR8_wt_cortex	SRR039610.GSM527274: DICER_wt_hippocampus	SRR040488.GSM533911: E18.5 wild type LIVER small RNA	SRR042477.GSM539869: mouse brain tissue [09-002]	SRR042482.GSM539874: mouse skin tissue [09-002]	SRR069834.GSM304914: Analysis of small RNAs in murine neutrophils cultured in vitro by Solexa/Illumina genome analyzer	SRR206939.GSM723280: NAc_saline_smallRNA	SRR206940.GSM723281: NAc_cocaine_smallRNA	SRR206941.GSM723282: PSD_saline_smallRNA	SRR206942.GSM723283: PSD_cocaine_smallRNA	SRR306526.GSM750569: Cerebellum_1	SRR306527.GSM750570: Cerebellum_2	SRR306528.GSM750571: Cerebellum_3	SRR306529.GSM750572: Purkinje_1	SRR306530.GSM750573: Purkinje_2
[truncated: 414 more rows]
[truncated: 57 more columns]

[truncated: 16 more sheets: mmu-mir-2134-1, mmu-mir-2134-2, mmu-mir-2134-3, mmu-mir-2134-4, mmu-mir-2143-1, mmu-mir-2143-2, mmu-mir-2143-3, mmu-mir-689-1, mmu-mir-689-2, mmu-mir-5105, hsa-mir-663a, hsa-mir-663b, hsa-mir-1826, hsa-mir-3648, hsa-mir-3687, hsa-mir-6087]
