# Supplementary material
Source: HighWire-hosted journal article supplement (doi:10.1101/rna.049098.114)
Supplement: TableS5_Oligos.xlsx [file TableS5_Oligos.xlsx]

## Sheet: Sheet1
Oligo name	sequence		reference
Oligo probes for Northern blotting
hpCG4068B	ggagcgaacttgttggagtcaa	Exiqon LNA,	Okamura et al. Nature 2008
miR-1010	CTGCAAATGGAACGATAGGTGAAA	Exiqon LNA,	Okamura et al. Cell 2007
miR-9a	tcatacagctagataaccaaaga	Exiqon LNA,	Martin et al. MCB 2009
miR-8	GACATCTTTACCTGACAGTATTA	Exiqon LNA,	Okamura et al. Nature 2008
miR-ITS1	TGGCATATATCAATTCCTTCAATA	Exiqon LNA,	This study
miR-ITS1	TGGCATATATCAATTCCTTCAATA	DNA	This study
Bantam	aatcagctttcaaaatgatctca	DNA	Okamura et al. Nature 2008
2S rRNA	TAC AAC CCT CAA CCA TAT GTA GTC CAA GCA	DNA	Okamura et al. Cell 2007
antisense inhibitors
ASO-hp-CG4068-B	mAmAmCmAmUmgmgmamgmcmgmamamcmUmUmgmUmUmgmgmamgmUmcmamamAmUmAmCmA	2' Ome RNA	Okamura et al. Nature 2007
RC-miR-288	mUmGmUmCmAmUmGmAmAmAmUmGmAmAmAmUmCmGmAmCmAmUmGmAmAmAmCmCmAmAmC	2' Ome RNA	Okamura et al. Nature 2008
2Ome-ITS1-5p-1-RC	mAmAmCmAmU mUmGmGmCmAmUmAmUmAmUmCmAmAmUmUmCmCmUmUmCmAmAmUma mAmUmAmCmA	2' Ome RNA	This study
DNA oligos for sensor constructs
ITS1_5p_perfect_A	GGCCGC TGGCATATATCAATTCCTTCAAta aatcac TGGCATATATCAATTCCTTCAAta C	DNA	This study
ITS1_perfect_B	TCGAG TATTGAAGGAATTGATATATGCCA GTGATT TATTGAAGGAATTGATATATGCCA GC	DNA	This study
